# Supplementary material
Source: PubMed Central journal article supplement (PMC4350029)

# Supplementary Figure S3

a.

MS/MS Fragmentation of **PVKGAYR**

Found in **Q07666**, KH domain-containing, RNA-binding, signal transduction-associated protein 1 OS=Homo sapiens GN=KHDRBS1 PE=1 SV=1

Match to Query 1018: 859.491428 from(430.752990,2+) intensity(111006.5938)

Title: File1319 Spectrum5739 scans: 6249

Data file I:\2013-9-13-Hela-Prometh-Fr2-ZW.mgf

Click mouse within plot area to zoom in by factor of two about that point

Or, Plot from  to  Da

Label all possible matches  Label matches used for scoring

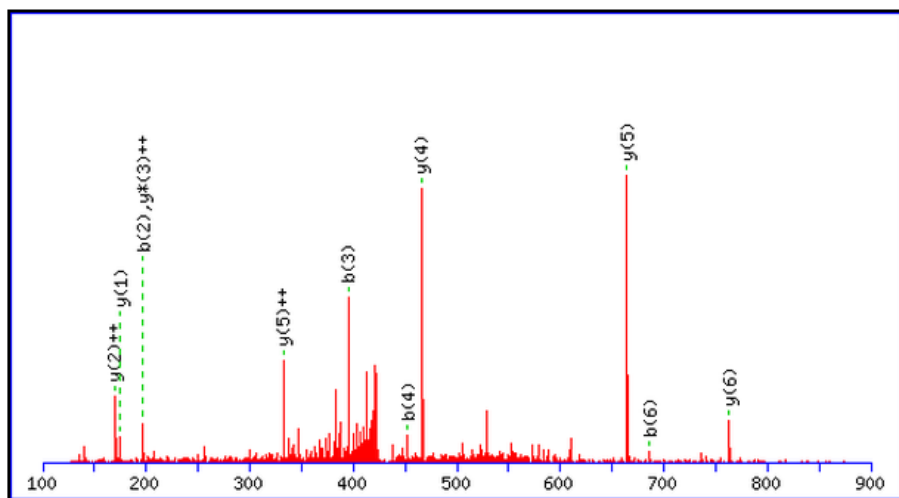

Monoisotopic mass of neutral peptide Mr(calc): 859.4916  
Fixed modifications: Carbamidomethyl (C) (apply to specified residues or termini)  
Variable modifications:  
K3 : Propionyl-Methylation (K)  
Ions Score: 20 Expect: 4.6  
Matches : 11/44 fragment ions using 24 most intense peaks ([help](#))

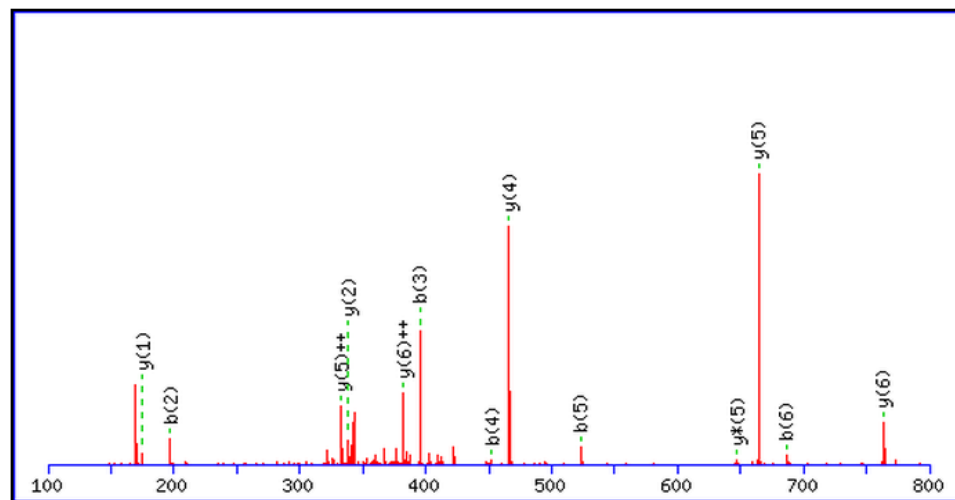

Monoisotopic mass of neutral peptide Mr(calc): 859.4916  
Variable modifications:  
K3 : Propionyl-Methylation (K)  
Ions Score: 31 Expect: 0.26  
Matches : 13/44 fragment ions using 28 most intense peaks ([help](#))

MS/MS spectrum of HeLa cell derived peptide  
PVK<sub>pr+me1</sub>GAYR from protein KHDRBS1

Corresponding synthetic peptide

b.

**MS/MS Fragmentation of KGGPDDR**

Found in **Q15056**, Eukaryotic translation initiation factor 4H OS=Homo sapiens GN=EIF4H PE=1 SV=5

Match to Query 878: 817.420508 from(409.717530, 2+) intensity(128621.9297)

Title: File332 Spectrum1569 scans: 2191

Data file \\192.168.1.104\public\raw data\Elite\_01\methylation\_ZW\k562\2013-5-23-K562-Kpropio-methyl-IP-Fr10-ZW.mgf

Click mouse within plot area to zoom in by factor of two about that point

Or,   to  Da

Label all possible matches  Label matches used for scoring

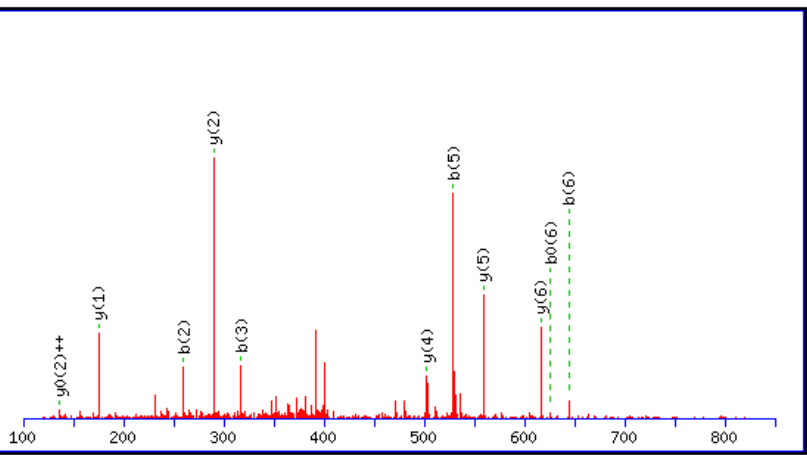

**Monoisotopic mass of neutral peptide Mr(calc):** 817.4203  
**Fixed modifications:** Carbamidomethyl (C) (apply to specified residues or termini only)  
**Variable modifications:**  
 K1 : Propionyl-(13CD3)Methyl (K)  
**Ions Score:** 36 **Expect:** 0.046  
**Matches :** 11/62 fragment ions using 21 most intense peaks ([help](#))

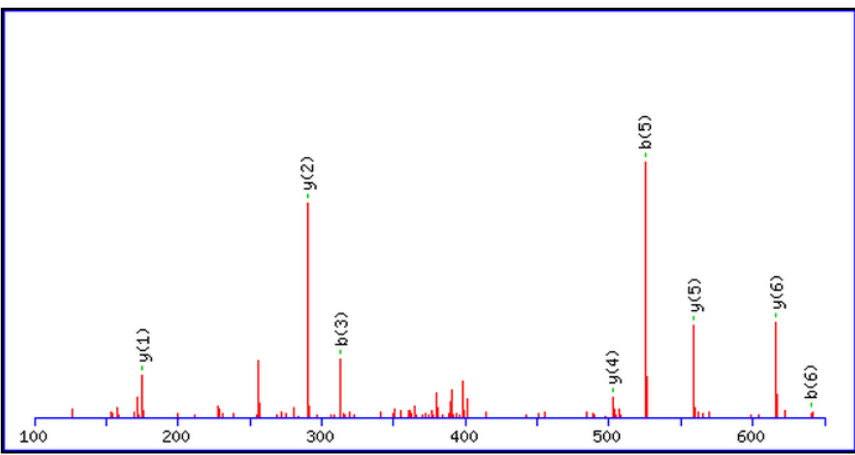

**Monoisotopic mass of neutral peptide Mr(calc):** 813.3981  
**Variable modifications:**  
 K1 : Propionyl-Methylation (K)  
**Ions Score:** 46 **Expect:** 0.0015  
**Matches :** 8/62 fragment ions using 12 most intense peaks ([help](#))

MS/MS spectrum of K562 cell derived peptide  
 K<sub>pr+me1</sub>GGPDDR from protein EIF4H

Corresponding synthetic peptide

C.

MS/MS Fragmentation of **LKLGVKDAR**

Found in **F8WCX5**, Polymerase delta-interacting protein 3 OS=Homo sapiens GN=POLDIP3 PE=2 SV=1

Match to Query 2801: 1128.713848 from(565.364200, 2+) intensity(20450.9316)

Title: File365 Spectrum9513 scans: 11035

Data file \\192.168.1.104\public\raw data\Elite\_01\methylation\_ZW\k562\2013-6-3-K562-Kpropio-methyl-IP-Fr20-ZW.mgf

Click mouse within plot area to zoom in by factor of two about that point

Or,   to  Da

Label all possible matches  Label matches used for scoring

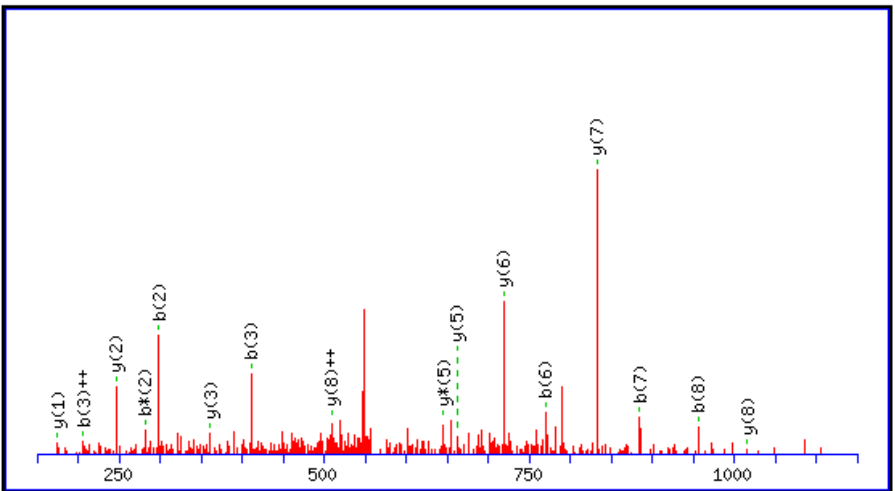

**Monoisotopic mass of neutral peptide Mr(calc):** 1128.7139  
**Fixed modifications:** Carbamidomethyl (C) (apply to specified residues or termini)  
**Variable modifications:**  
**K2** : Propionyl (K)  
**K6** : Propionyl-(13CD3)Methyl (K)  
**Ions Score:** 28 **Expect:** 0.27  
**Matches :** 16/78 fragment ions using 47 most intense peaks ([help](#))

MS/MS spectrum of K562 cell derived peptide  
 LK<sub>pr</sub> LGVK<sub>pr+me1</sub> DAR from protein POLDIP3

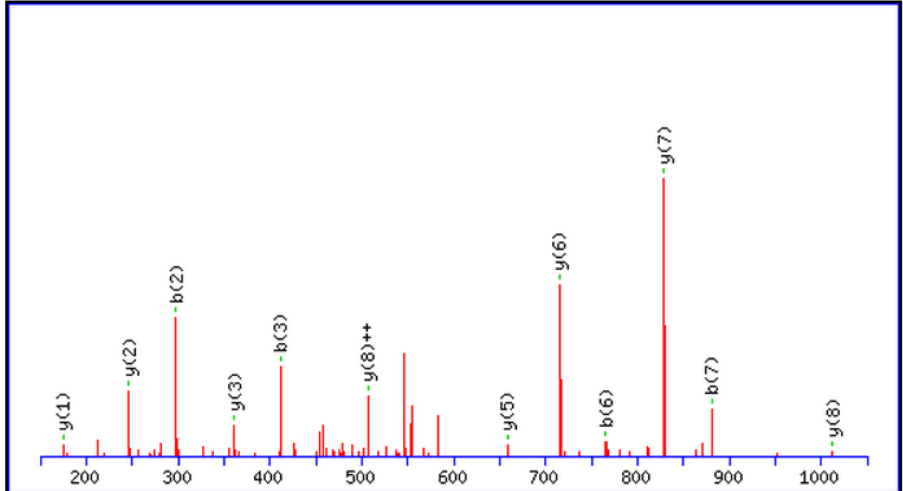

**Monoisotopic mass of neutral peptide Mr(calc):** 1124.6917  
**Variable modifications:**  
**K2** : Propionyl (K)  
**K6** : Propionyl-Methylation (K)  
**Ions Score:** 46 **Expect:** 0.0028  
**Matches :** 12/78 fragment ions using 24 most intense peaks ([help](#))

Corresponding synthetic peptide

d.

MS/MS Fragmentation of **KLAEQFPR**

Found in **E9PL10**, Transcription factor BTF3 homolog 4 OS=Homo sapiens GN=BTF3L4 PE=2 SV=1

Match to Query 2898: 1061.614348 from(531.814450,2+) intensity(101693.7109)

Title: File394 Spectrum9278 scans: 10529

Data file \\192.168.1.104\public\raw data\Elite\_01\methylation\_ZW\SW620\2013-5-16-620-Kpropio-methyl-IP-Fr8-ZW.mgf

Click mouse within plot area to zoom in by factor of two about that point

Or,   to  Da

Label all possible matches  Label matches used for scoring

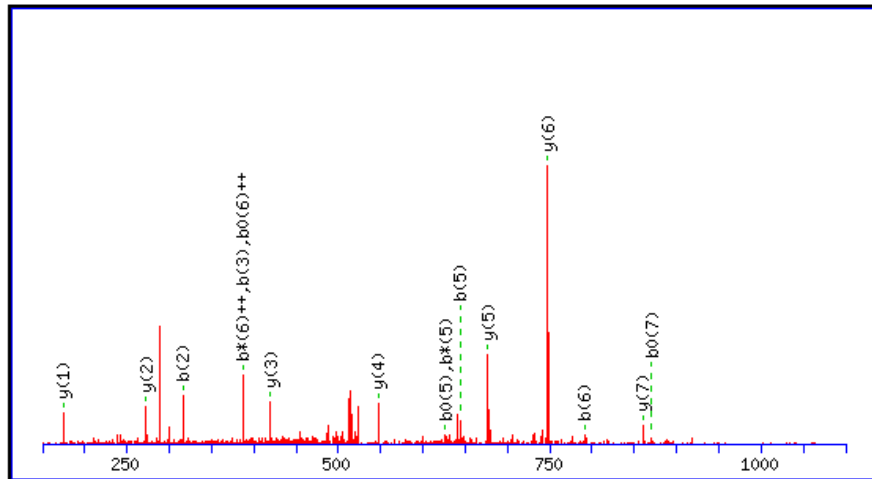

**Monoisotopic mass of neutral peptide Mr(calc):** 1061.6142

**Fixed modifications:** Carbamidomethyl (C) (apply to specified residues or termini on

**Variable modifications:**

K1 : Propionyl-(13CD3)Methyl (K)

**Ions Score:** 45 **Expect:** 0.011

**Matches :** 16/70 fragment ions using 28 most intense peaks ([help](#))

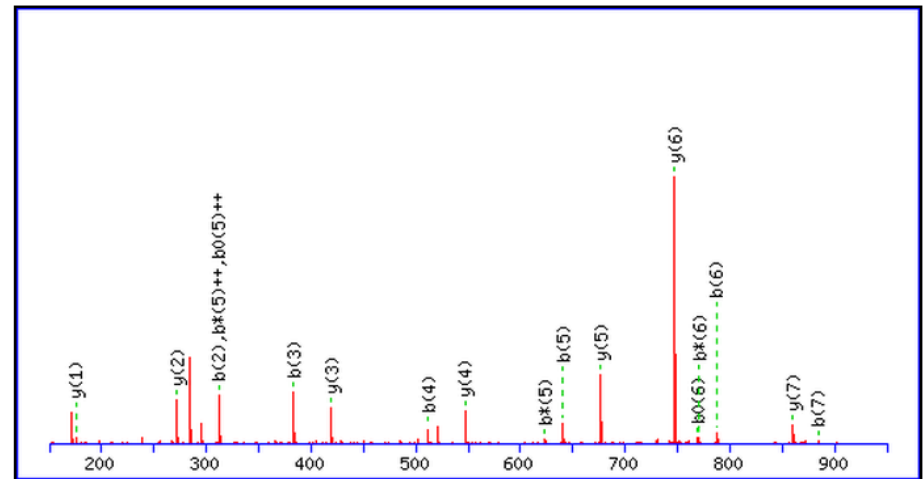

**Monoisotopic mass of neutral peptide Mr(calc):** 1057.5920

**Variable modifications:**

K1 : Propionyl-Methylation (K)

**Ions Score:** 56 **Expect:** 0.00086

**Matches :** 18/70 fragment ions using 24 most intense peaks ([help](#))

MS/MS spectrum of SW620 cell derived peptide K<sub>pr+me1</sub>LAEQFPR from protein BTF3L4

Corresponding synthetic peptide

e.

MS/MS Fragmentation of **IKGKVQDAR**

Found in **Q9BY77-2**, Isoform 2 of Polymerase delta-interacting protein 3 OS=Homo sapiens GN=POLDIP3

Match to Query 4700: 1143.687348 from(572.850950,2+) intensity(36830.8047)

Title: File336 Spectrum5985 scans: 7126

Data file \\192.168.1.104\public\raw data\Elite\_01\methylation\_ZW\k562\2013-5-23-K562-Kpropio-methyl-IP-Fr13-ZW.mgf

Click mouse within plot area to zoom in by factor of two about that point

Or,   to  Da

Label all possible matches  Label matches used for scoring

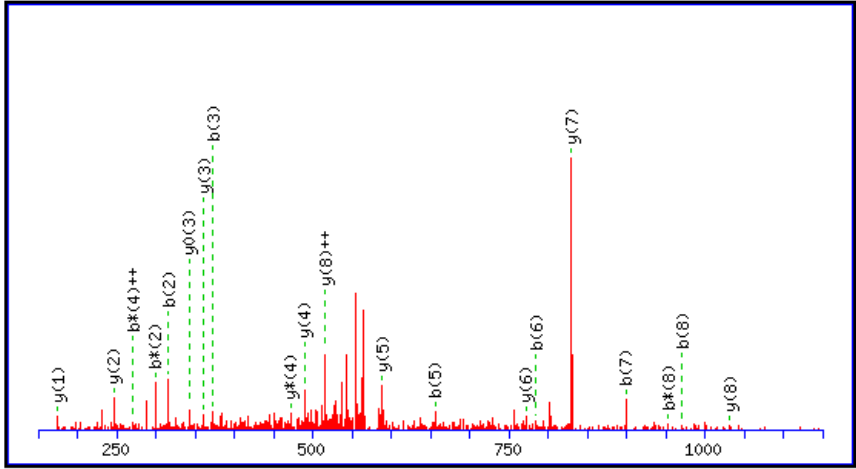

**Monoisotopic mass of neutral peptide Mr(calc):** 1143.6884  
**Fixed modifications:** Carbamidomethyl (C) (apply to specified residues or termini only)  
**Variable modifications:**  
**K2** : Propionyl-(13CD3)Methyl (K)  
**K4** : Propionyl (K)  
**Ions Score:** 28 **Expect:** 0.41  
**Matches** : 20/78 fragment ions using 75 most intense peaks ([help](#))

MS/MS spectrum of K562 cell derived peptide  $IK_{pr+me1}GK_{pr}VQDAR$  from protein POLDIP3

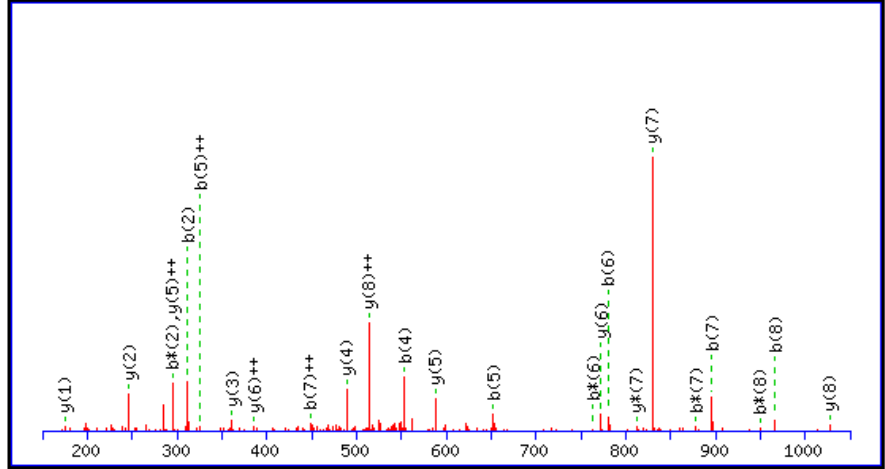

**Monoisotopic mass of neutral peptide Mr(calc):** 1139.6662  
**Variable modifications:**  
**K2** : Propionyl-Methylation (K)  
**K4** : Propionyl (K)  
**Ions Score:** 43 **Expect:** 0.0076  
**Matches** : 24/78 fragment ions using 50 most intense peaks ([help](#))

Corresponding synthetic peptide

f.

MS/MS Fragmentation of **LANTQGKKAKR**

Found in **Q99459**, Cell division cycle 5-like protein OS=Homo sapiens GN=CDC5L PE=1 SV=2

Match to Query 8167: 1399.843368 from(700.928960,2+) intensity(262291.8750)

Title: File359 Spectrum6057 scans: 7190

Data file \\192.168.1.104\public\raw data\Elite\_01\methylation\_ZW\k562\2013-6-3-K562-Kpropio-methyl-IP-Fr14-ZW.mgf

Click mouse within plot area to zoom in by factor of two about that point

Or, Plot from  to  Da

Label all possible matches  Label matches used for scoring

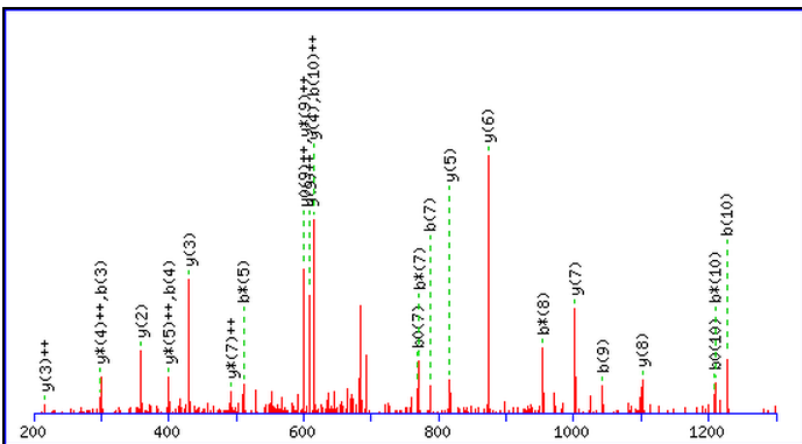

Monoisotopic mass of neutral peptide Mr(calc): 1399.8419

Fixed modifications: Carbamidomethyl (C) (apply to specified residues or termini only)

Variable modifications:

K7 : Propionyl-(13CD3)Methyl (K)

K8 : Propionyl (K)

K10 : Propionyl (K)

Ions Score: 48 Expect: 0.0035

Matches : 26/96 fragment ions using 33 most intense peaks [\(help\)](#)

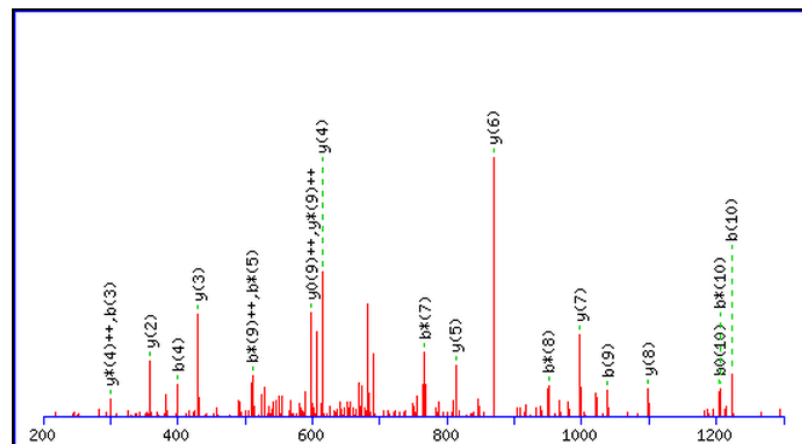

Monoisotopic mass of neutral peptide Mr(calc): 1395.8198

Variable modifications:

K7 : Propionyl-Methylation (K)

K8 : Propionyl (K)

K10 : Propionyl (K)

Ions Score: 60 Expect: 0.00023

Matches : 20/96 fragment ions using 22 most intense peaks [\(help\)](#)

MS/MS spectrum of K562 cell derived peptide  
LANTQGK<sub>pr+me1</sub>K<sub>pr</sub>AK<sub>pr</sub>R from protein CDC5L

Corresponding synthetic peptide

MS/MS Fragmentation of **YIGIVKQAGLER**

Found in **P52597**, Heterogeneous nuclear ribonucleoprotein F OS=Homo sapiens GN=HNRNPF PE=1 SV=3

Match to Query 7163: 1419.836888 from(710.925720,2+) intensity(76685.4297)

Title: File309 Spectrum12005 scans: 13689

Data file \\192.168.1.104\public\raw data\Elite\_01\methylation\_ZW\k562\2013-5-23-K562-Kpropio-methyl-IP-Fr6-ZW.mgf

Click mouse within plot area to zoom in by factor of two about that point

Or, Plot from  to  Da

Label all possible matches  Label matches used for scoring

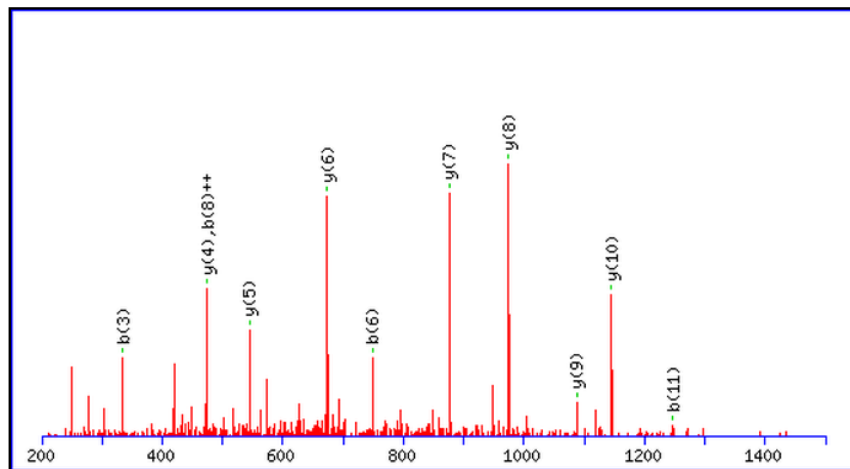

Monoisotopic mass of neutral peptide Mr(calc): 1419.8358  
 Fixed modifications: Carbamidomethyl (C) (apply to specified residues or termini)  
 Variable modifications:  
 K6 : Propionyl-(13CD3)Methyl (K)  
 Ions Score: 61 Expect: 0.00024  
 Matches : 11/100 fragment ions using 12 most intense peaks ([help](#))

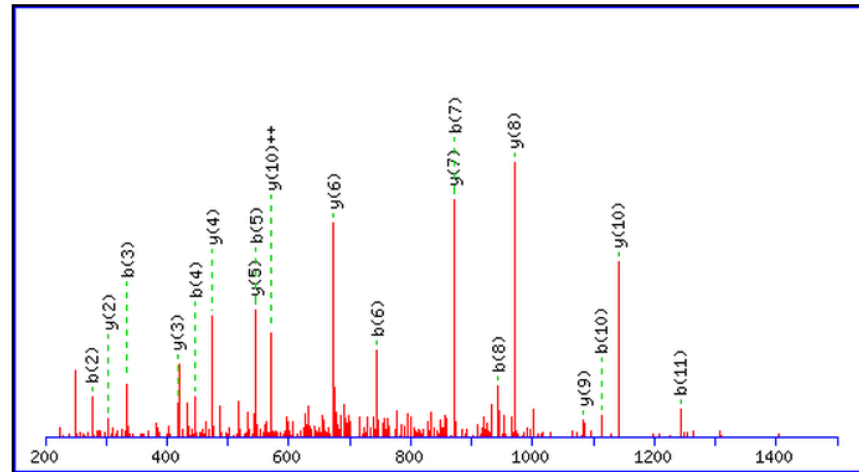

Monoisotopic mass of neutral peptide Mr(calc): 1415.8136  
 Variable modifications:  
 K6 : Propionyl-Methylation (K)  
 Ions Score: 63 Expect: 0.00011  
 Matches : 19/100 fragment ions using 34 most intense peaks ([help](#))

MS/MS spectrum of K562 cell derived peptide  
 YIGIVK<sub>pr+me1</sub>QAGLER from protein HNRNPF

Corresponding synthetic peptide

# h.

## MS/MS Fragmentation of INTLFQKDR

Found in **I3L3Z8**, Pre-mRNA-processing-splicing factor 8 (Fragment) OS=Homo sapiens GN=PRPF8 PE=4 SV=1

Match to Query 6346: 1207.681608 from(604.848080,2+) intensity(116592.1484)

Title: File320 Spectrum12819 scans: 14303

Data file \\192.168.1.104\public\raw data\Elite\_01\methylation\_ZW\k562\2013-5-23-562-Kpropio-methyl-IP-Fr5-ZW.mgf

Click mouse within plot area to zoom in by factor of two about that point

Or,   to  Da

Label all possible matches  Label matches used for scoring

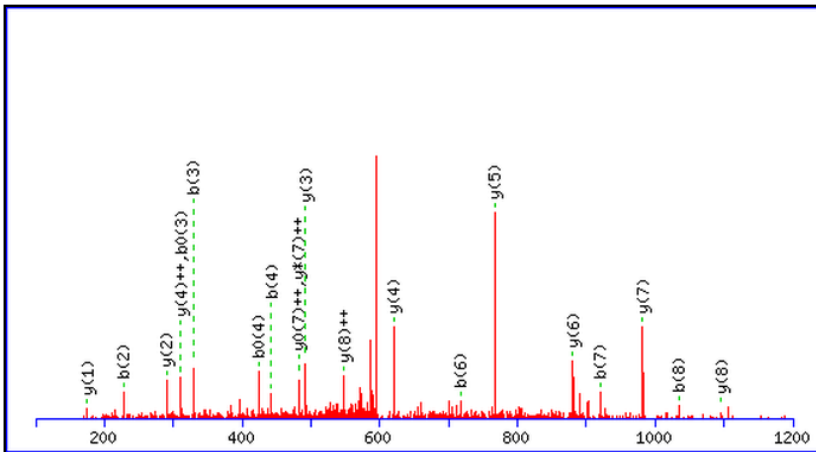

Monoisotopic mass of neutral peptide Mr(calc): 1207.6834

Fixed modifications: Carbamidomethyl (C) (apply to specified residues or termini only)

Variable modifications:

K7 : Propionyl-(13CD3)Methyl (K)

Ions Score: 58 Expect: 0.00062

Matches : 20/88 fragment ions using 32 most intense peaks ([help](#))

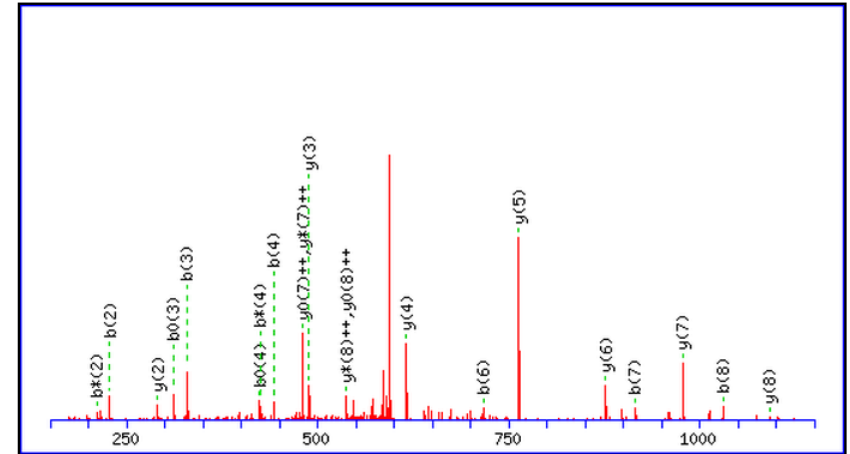

Monoisotopic mass of neutral peptide Mr(calc): 1203.6612

Variable modifications:

K7 : Propionyl-Methylation (K)

Ions Score: 53 Expect: 0.0014

Matches : 21/88 fragment ions using 30 most intense peaks ([help](#))

MS/MS spectrum of K562 cell derived peptide  
INTLFQK<sub>pr+me1</sub>DR from protein PRPF8

Corresponding synthetic peptide



i.

MS/MS Fragmentation of **FLIKAPEGPPR**

Found in **F8WD00**, U3 small nucleolar RNA-associated protein 14 homolog A OS=Homo sapiens GN=UTP14A PE=2 SV=1

Match to Query 5650: 1297.766088 from(649.890320,2+) intensity(112340.5703)

Title: File314 Spectrum12142 scans: 14042

Data file \\192.168.1.104\public\raw data\Elite\_01\methylation\_ZW\k562\2013-5-23-K562-Kpropio-methyl-IP-Fr9-ZW.mgf

Click mouse within plot area to zoom in by factor of two about that point

Or, Plot from  to  Da

Label all possible matches  Label matches used for scoring

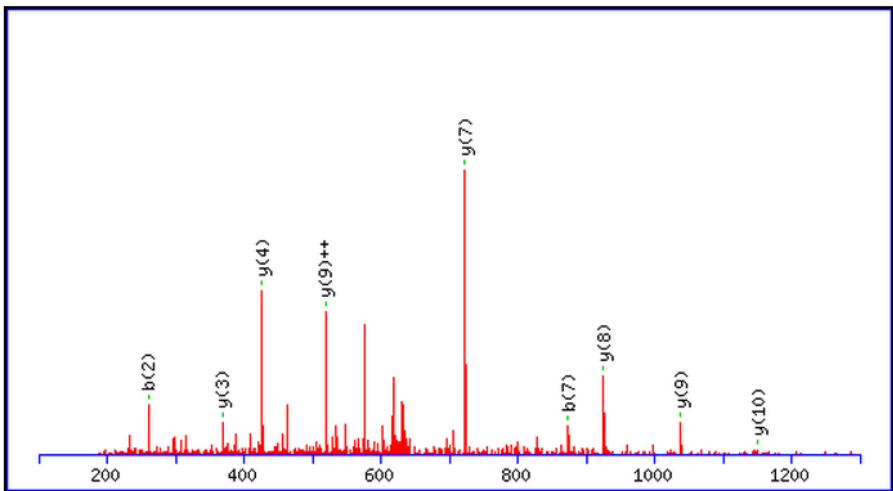

Monoisotopic mass of neutral peptide Mr(calc): 1297.7667  
 Fixed modifications: Carbamidomethyl (C) (apply to specified residues or to all)  
 Variable modifications:  
 K4 : Propionyl-(13CD3)Methyl (K)  
 Ions Score: 43 Expect: 0.018  
 Matches : 9/94 fragment ions using 12 most intense peaks ([help](#))

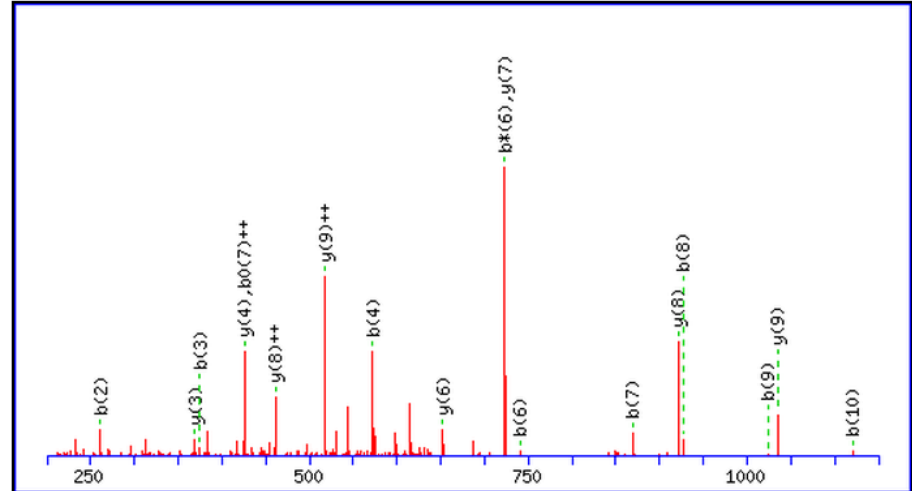

Monoisotopic mass of neutral peptide Mr(calc): 1293.7445  
 Variable modifications:  
 K4 : Propionyl-Methylation (K)  
 Ions Score: 55 Expect: 0.00052  
 Matches : 18/94 fragment ions using 28 most intense peaks ([help](#))

MS/MS spectrum of K562 cell derived peptide  
 FLIK<sub>pr+me1</sub>APEGPPR from protein UTP14A

Corresponding synthetic peptide

j.

### MS/MS Fragmentation of **GKQGGKAR**

Found in **P0C0S8|H2A1\_HUMAN** in **Uniprot\_Human**, Histone H2A type 1 OS=Homo sapiens GN=HIST1H2AG PE=1 SV=2

Match to Query 1687: 930.552588 from(466.283570,2+) intensity(65342.2305)

Title: File307 Spectrum1813 scans: 2444

Data file I:\k562 Kpropio-methyl-IP\k562-propionyl\2013-5-23-K562-Kpropio-methyl-IP-Fr16-ZW.mgf

Click mouse within plot area to zoom in by factor of two about that point

Or,  100 to  Da

Label all possible matches  Label matches used for scoring

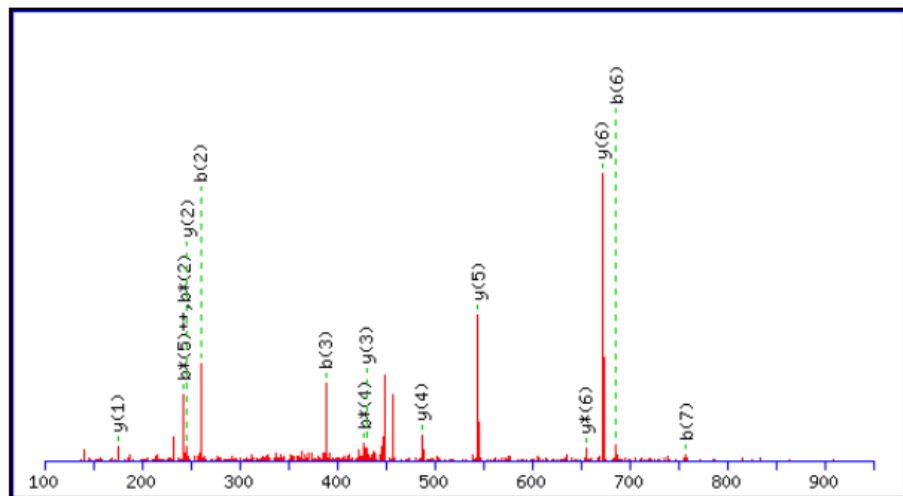

Monoisotopic mass of neutral peptide Mr(calc): 930.5519  
 Fixed modifications: Carbamidomethyl (C) (apply to specified residues or terms)  
 Variable modifications:  
 K2 : Propionyl-(13CD3)Methyl (K)  
 K6 : Propionyl (K)  
 Ions Score: 36 Expect: 0.056  
 Matches : 14/54 fragment ions using 30 most intense peaks ([help](#))

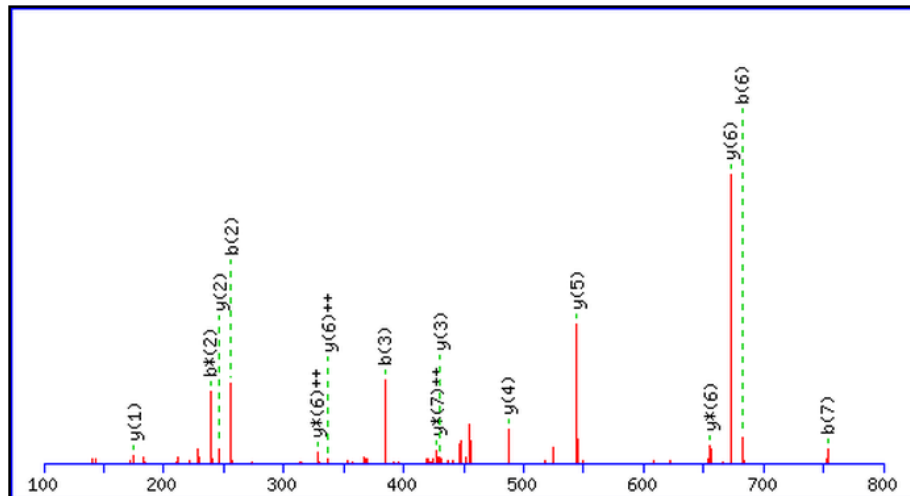

Monoisotopic mass of neutral peptide Mr(calc): 926.5298  
 Variable modifications:  
 K2 : Propionyl-Methylation (K)  
 K6 : Propionyl (K)  
 Ions Score: 41 Expect: 0.01  
 Matches : 15/54 fragment ions using 27 most intense peaks ([help](#))

MS/MS spectrum of K562 cell derived peptide  
 $GK_{pr+me1}QGGK_{pr}AR$  from protein H2A

Corresponding synthetic peptide

# Supplementary Figure S4

a

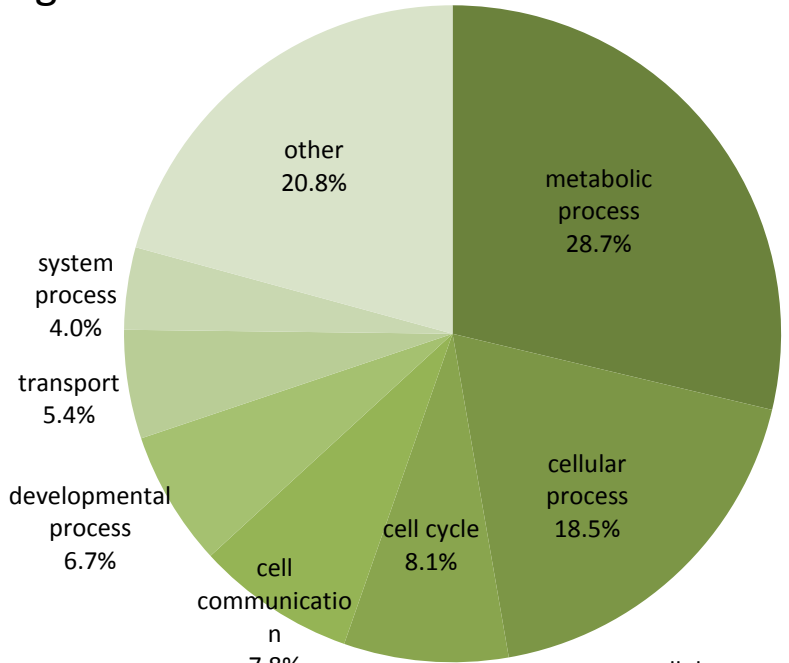

Biological Processes

b

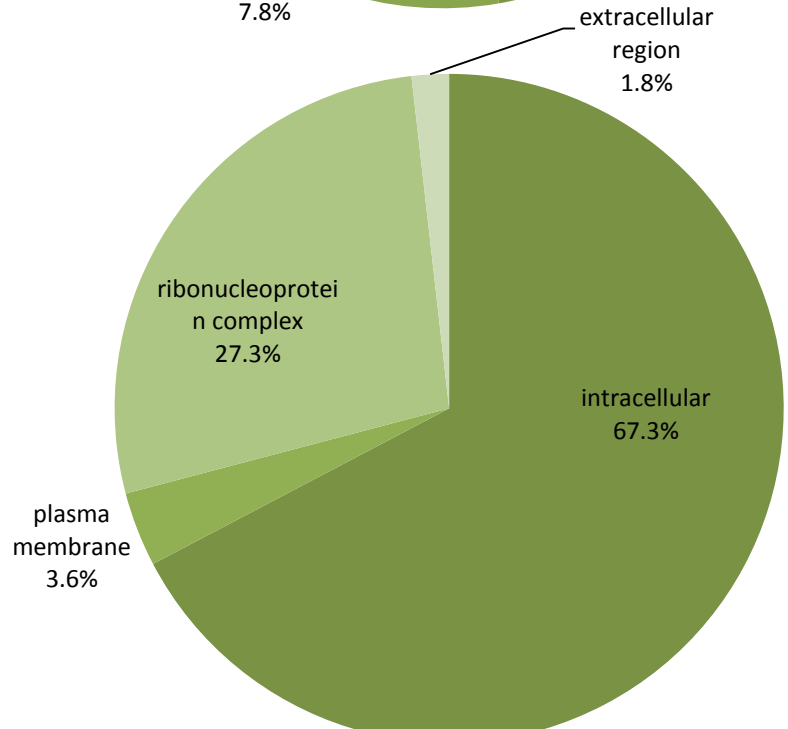

Cellular Component

# Supplementary Figure S5

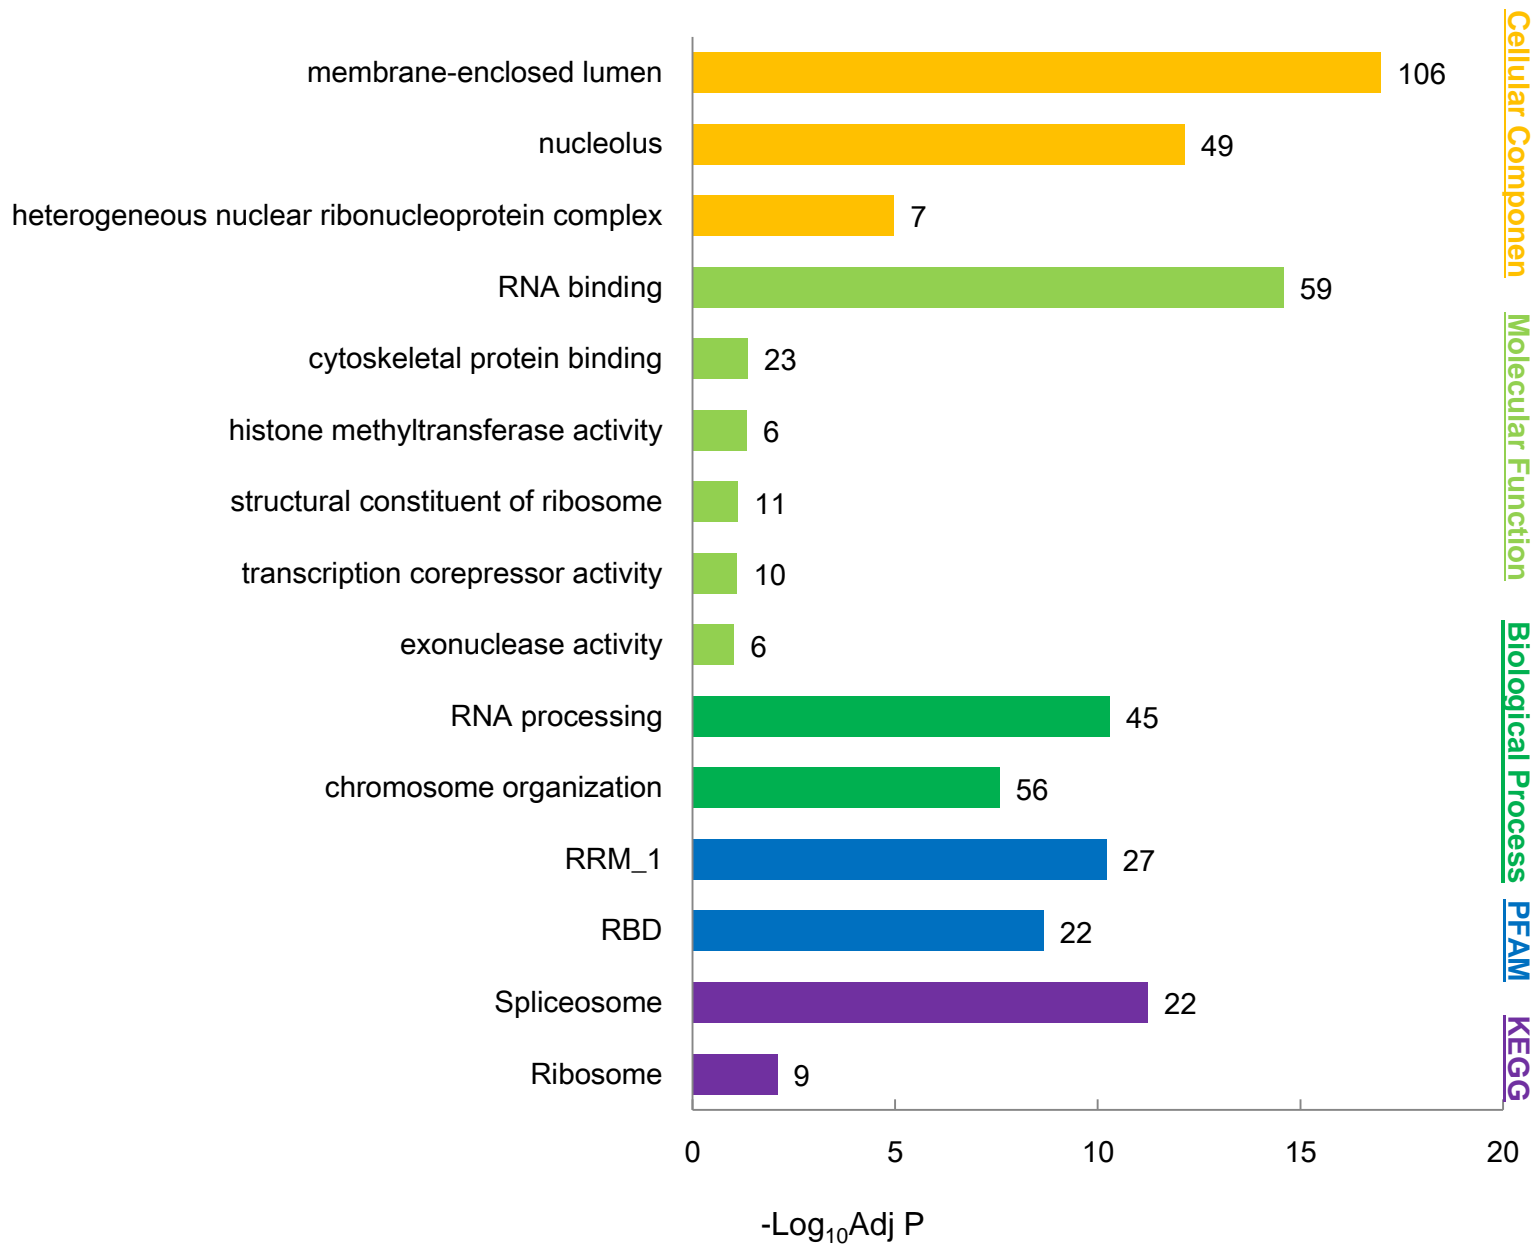

# Supplementary Figure S6

a

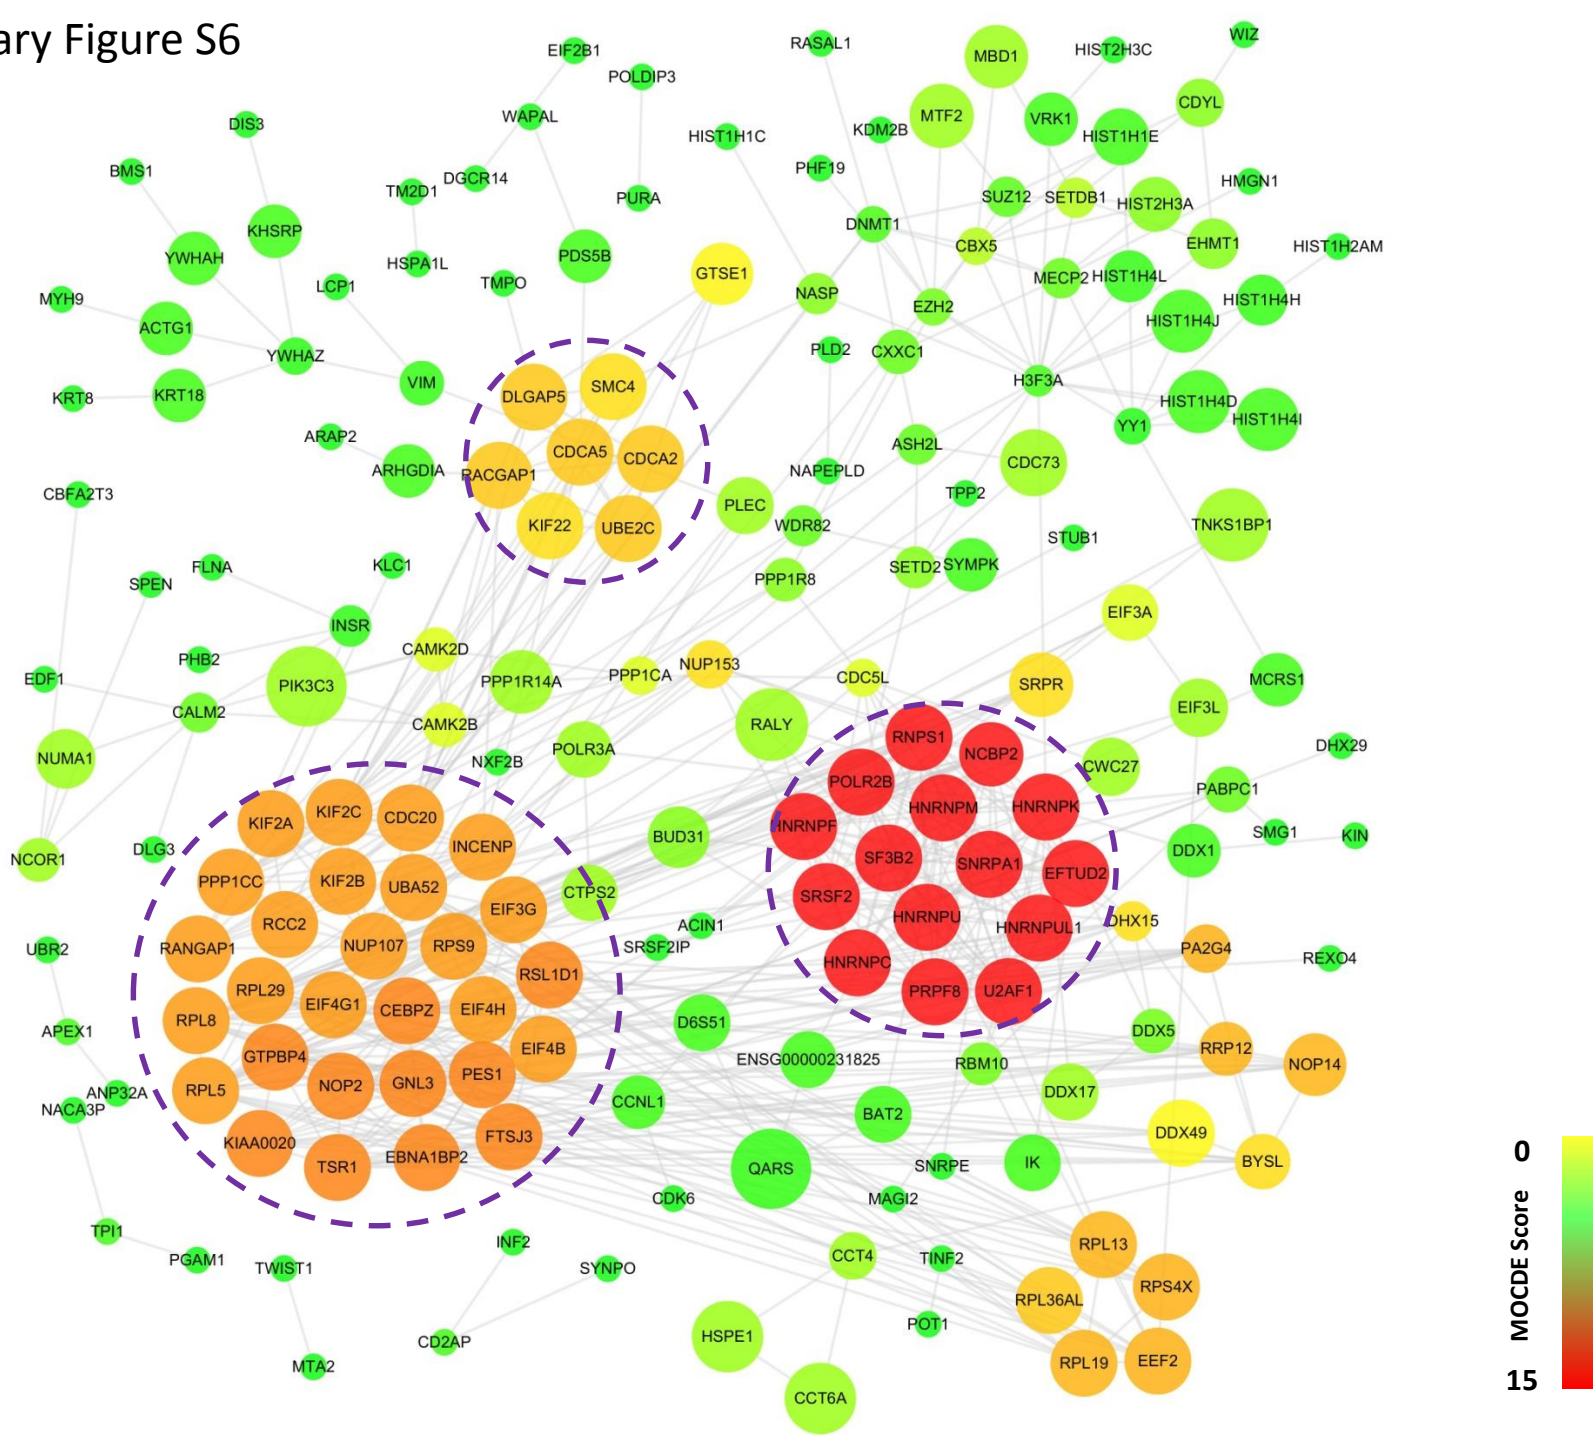

b

RNA splicing

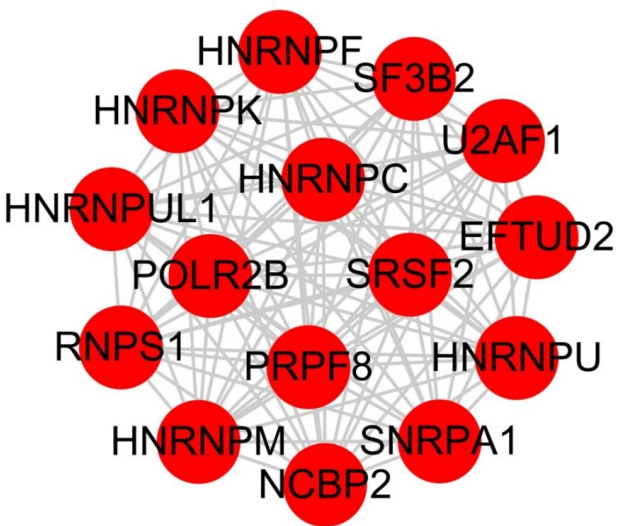

Cluster 1 (Cluster score = 15)  
nodes = 15 , edges = 105

c

Ribosome

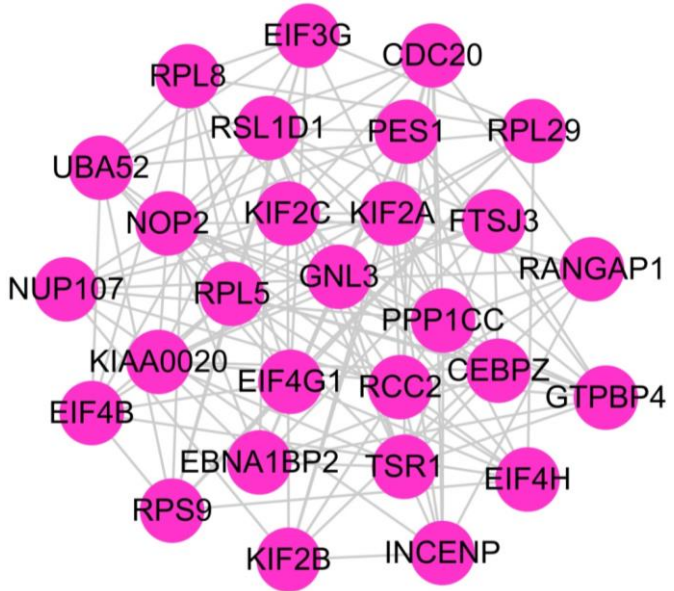

Cluster 2 (Cluster score = 8.96)  
nodes = 28 , edges = 121

d

Cell cycle

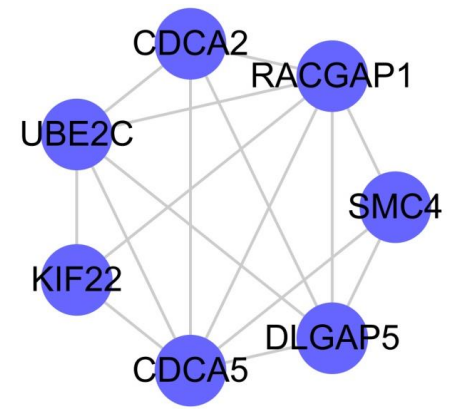

Cluster 3 (Cluster score = 5.33)  
nodes = 7 , edges = 16

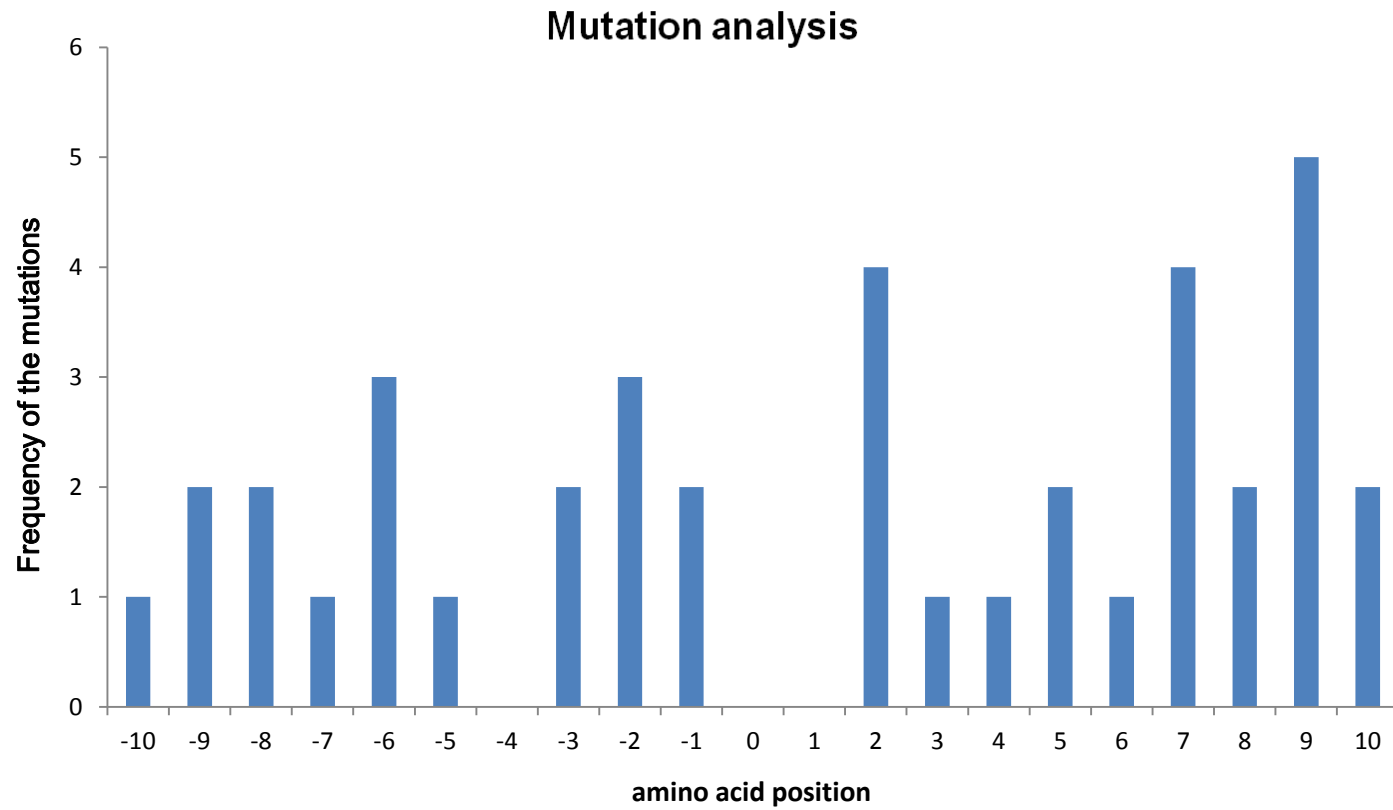

Supplementary Figure S8

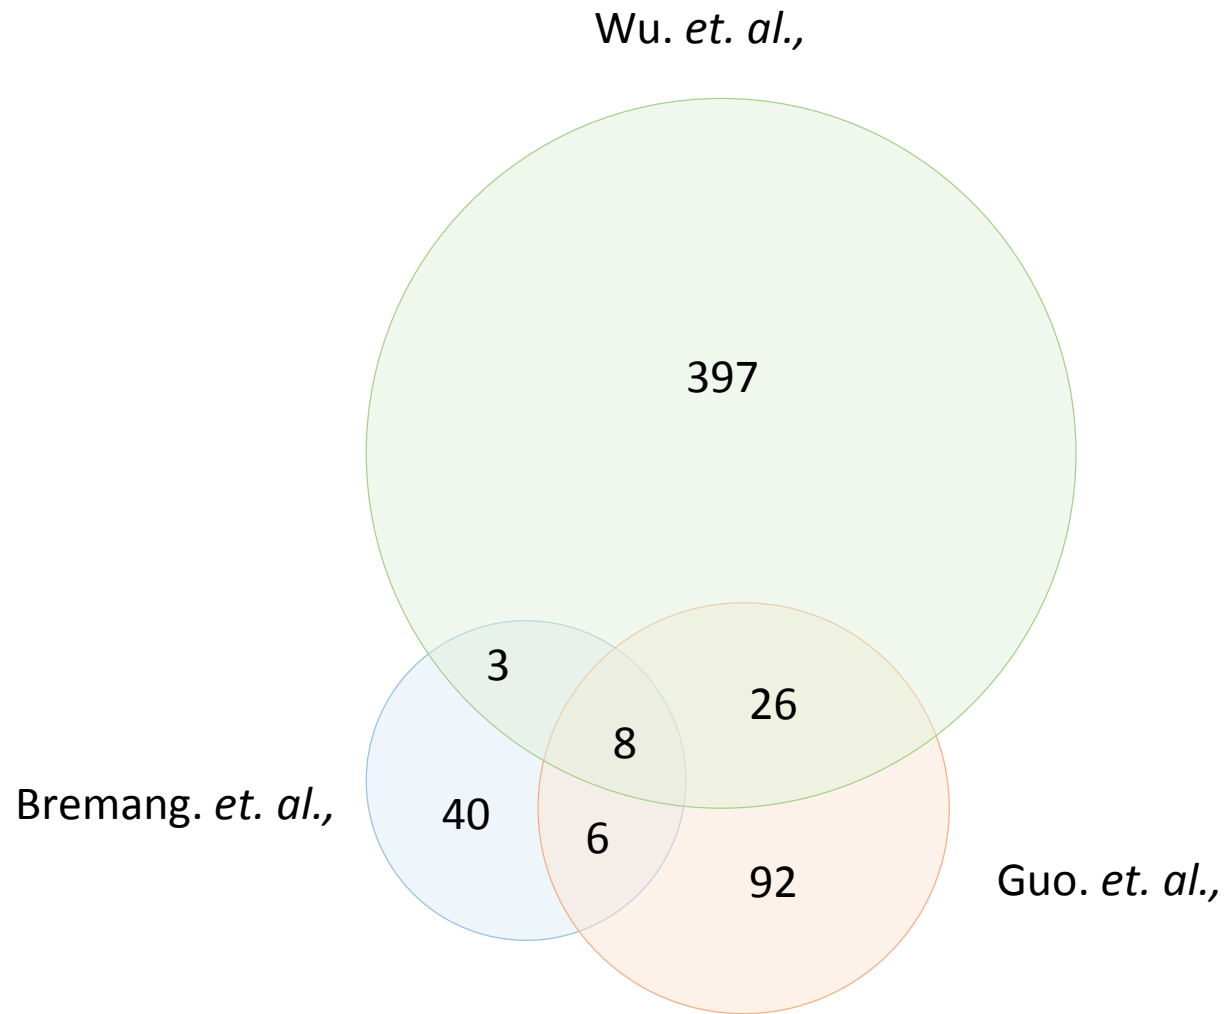

Supplement: supp_M114.044255_mcp.M114.044255-11.pdf [file supp_M114.044255_mcp.M114.044255-11.pdf]
