# Supplementary material
Source: PubMed Central journal article supplement (PMC4350029)
Supplement: supp_M114.044255_mcp.M114.044255-10.pdf [file supp_M114.044255_mcp.M114.044255-10.pdf]

MS/MS Fragmentation of **TSLKAKQLLQTSSTKR**Found in **HOY9L2**, SLAIN motif-containing protein 2 (Fragment) OS=Homo sapiens GN=SLAIN2 PE=4 SV=1

Match to Query 14719: 1975.156108 from(988.585330,2+) intensity(194919.0938)

Title: File392 Spectrum14778 scans: 16369

Data file \\192.168.1.104\public\raw data\Elite\_01\methylation\_ZW\SW620\2013-5-16-620-Kpropio-methyl-IP-Fr6-ZW.mgf

Click mouse within plot area to zoom in by factor of two about that point

Or,   to  Da Label all possible matches  Label matches used for scoring 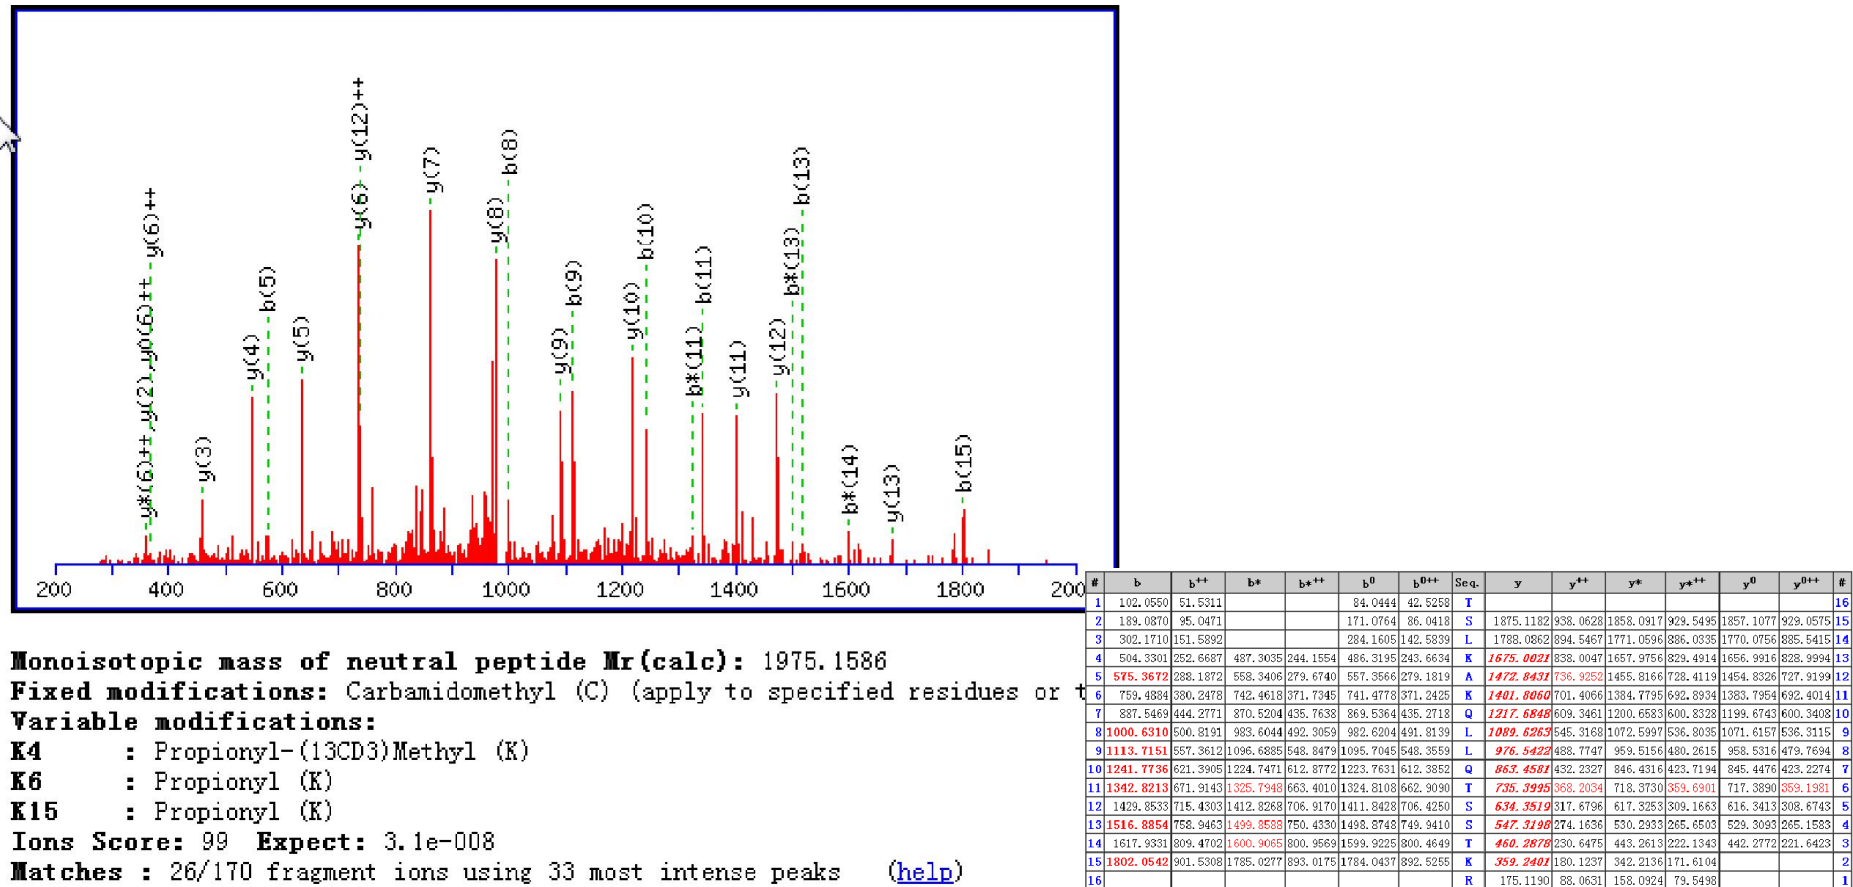

MS/MS Fragmentation of **KQSGYGGQTKPIFR**Found in **HOY3V9**, Uncharacterized protein (Fragment) OS=Homo sapiens PE=2 SV=1

Match to Query 10592: 1695.920508 from(848.967530,2+) intensity(857648.3125)

Title: File654 Spectrum10395 scans: 11930

Data file \\192.168.1.104\public\raw data\Elite\_01\methylation\_ZW\SW620\2013-6-18-SW620-Kpropio-methyl-IP-Fr4-ZW.mgf

Click mouse within plot area to zoom in by factor of two about that point

Or,   to  Da Label all possible matches  Label matches used for scoring 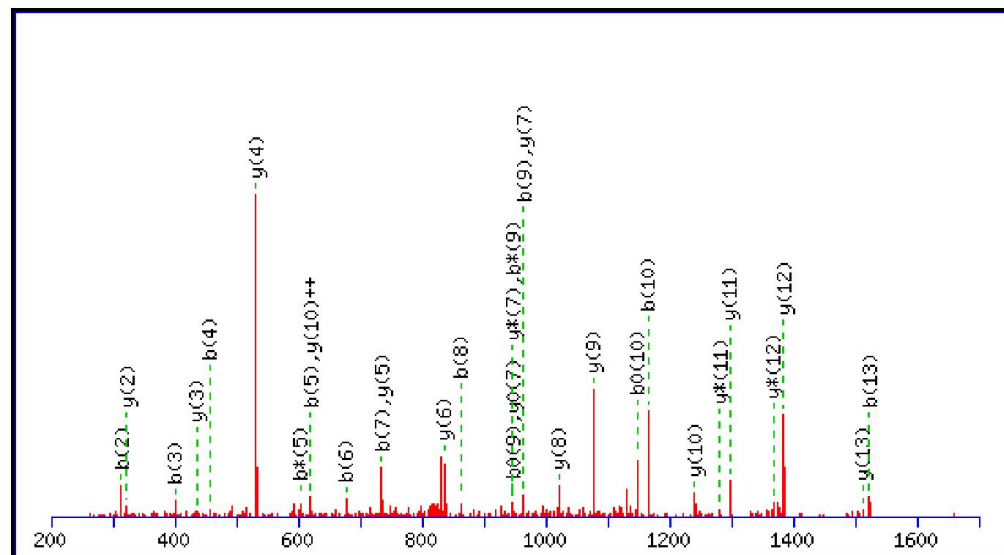**Monoisotopic mass of neutral peptide Mr(calc):** 1695.9217**Fixed modifications:** Carbamidomethyl (C) (apply to specified residues or termini only)**Variable modifications:****K1** : Propionyl (K)**K10** : Propionyl-(13CD3)Methyl (K)**Ions Score:** 97 **Expect:** 1.2e-007**Matches** : 31/142 fragment ions using 40 most intense peaks ([help](#))

| #  | b                | b <sup>++</sup> | b*              | b <sup>+++</sup> | b <sup>0</sup>   | b <sup>0++</sup> | Seq. | y                | y <sup>++</sup> | y*               | y <sup>+++</sup> | y <sup>0</sup>  | y <sup>0++</sup> | #  |
|----|------------------|-----------------|-----------------|------------------|------------------|------------------|------|------------------|-----------------|------------------|------------------|-----------------|------------------|----|
| 1  | 185.1285         | 93.0679         | 168.1019        | 84.5546          |                  |                  | K    |                  |                 |                  |                  |                 |                  | 14 |
| 2  | <b>313.1870</b>  | 157.0972        | 296.1605        | 148.5839         |                  |                  | Q    | <b>1512.8078</b> | 756.9075        | 1495.7812        | 748.3943         | 1494.7972       | 747.9023         | 13 |
| 3  | <b>400.2191</b>  | 200.6132        | 383.1925        | 192.0999         | 382.2085         | 191.6079         | S    | <b>1384.7492</b> | 692.8782        | <b>1367.7227</b> | 684.3650         | 1366.7386       | 683.8730         | 12 |
| 4  | <b>457.2405</b>  | 229.1239        | 440.2140        | 220.6106         | 439.2300         | 220.1186         | G    | <b>1297.7172</b> | 649.3622        | <b>1280.6906</b> | 640.8490         | 1279.7066       | 640.3569         | 11 |
| 5  | <b>620.3039</b>  | 310.6556        | <b>603.2773</b> | 302.1423         | 602.2933         | 301.6503         | Y    | <b>1240.6957</b> | <b>620.8515</b> | 1223.6692        | 612.3382         | 1222.6852       | 611.8462         | 10 |
| 6  | <b>677.3253</b>  | 339.1663        | 660.2988        | 330.6530         | 659.3148         | 330.1610         | G    | <b>1077.6324</b> | 539.3198        | 1060.6058        | 530.8066         | 1059.6218       | 530.3146         | 9  |
| 7  | <b>734.3468</b>  | 367.6770        | 717.3202        | 359.1638         | 716.3362         | 358.6717         | G    | <b>1020.6109</b> | 510.8091        | 1003.5844        | 502.2958         | 1002.6004       | 501.8038         | 8  |
| 8  | <b>862.4054</b>  | 431.7063        | 845.3788        | 423.1930         | 844.3948         | 422.7010         | Q    | <b>963.5895</b>  | 482.2984        | <b>946.5629</b>  | 473.7851         | <b>945.5789</b> | 473.2931         | 7  |
| 9  | <b>963.4530</b>  | 482.2302        | <b>946.4265</b> | 473.7169         | <b>945.4425</b>  | 473.2249         | T    | <b>835.5309</b>  | 418.2691        | 818.5043         | 409.7558         | 817.5203        | 409.2638         | 6  |
| 10 | <b>1165.6121</b> | 583.3097        | 1148.5855       | 574.7964         | <b>1147.6015</b> | 574.3044         | K    | <b>734.4832</b>  | 367.7452        | 717.4567         | 359.2320         |                 |                  | 5  |
| 11 | 1262.6648        | 631.8360        | 1245.6383       | 623.3228         | 1244.6543        | 622.8308         | P    | <b>532.3242</b>  | 266.6657        | 515.2976         | 258.1525         |                 |                  | 4  |
| 12 | 1375.7489        | 688.3781        | 1358.7223       | 679.8648         | 1357.7383        | 679.3723         | I    | <b>435.2714</b>  | 218.1394        | 418.2449         | 209.6261         |                 |                  | 3  |
| 13 | <b>1522.8173</b> | 761.9123        | 1505.7907       | 753.3990         | 1504.8067        | 752.9070         | F    | <b>322.1874</b>  | 161.5973        | 305.1608         | 153.0840         |                 |                  | 2  |
| 14 |                  |                 |                 |                  |                  |                  | R    | 175.1190         | 88.0631         | 158.0924         | 79.5498          |                 |                  | 1  |

Found in **F6QR24**, Nuclear pore complex protein Nup153 OS=Homo sapiens GN=NUP153 PE=2 SV=1

Match to Query 14797: 2275.205668 from(1138.610110,2+) intensity(0.0000)

Title: File422 Spectrum9337 scans: 10829

Data file \\192.168.1.104\public\raw data\Elite\_01\methylation\_ZW\SW620\2013-6-5-SW620-Kpropio-methyl-IP-Fr13-ZW.mgf

Click mouse within plot area to zoom in by factor of two about that point

Or,   to  Da Label all possible matches  Label matches used for scoring 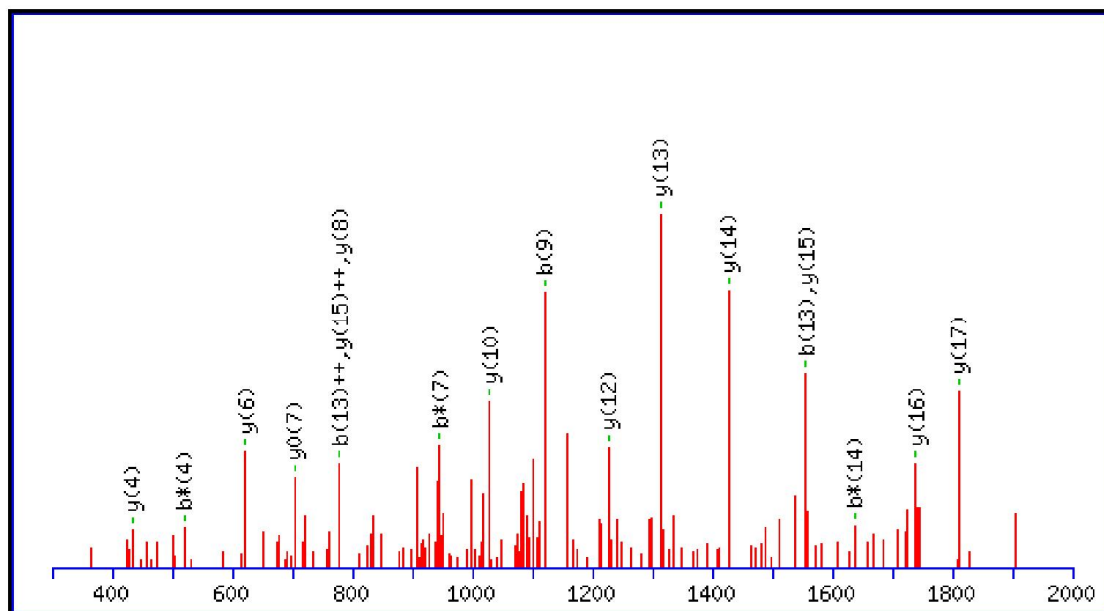**Monoisotopic mass of neutral peptide Mr(calc):** 2275.2023**Fixed modifications:** Carbamidomethyl (C) (apply to specified residues or**Variable modifications:****M2** : Label:13C(1)2H(3) (M)**K3** : Propionyl-(13CD3)Methyl (K)**K5** : Propionyl (K)**Ions Score:** 92 **Expect:** 5.4e-007**Matches** : 18/210 fragment ions using 16 most intense peaks ([help](#))

| #  | b                | b <sup>++</sup> | b <sup>+</sup> | b <sup>+</sup> ++ | b <sup>0</sup> | b <sup>0</sup> ++ | Seq. | y                | y <sup>++</sup>  | y <sup>+</sup> | y <sup>+</sup> ++ | y <sup>0</sup> | y <sup>0</sup> ++ | #         |    |
|----|------------------|-----------------|----------------|-------------------|----------------|-------------------|------|------------------|------------------|----------------|-------------------|----------------|-------------------|-----------|----|
| 1  | 129.0659         | 65.0366         | 112.0393       | 56.5233           |                |                   |      | <b>Q</b>         |                  |                |                   |                |                   | 20        |    |
| 2  | 254.1285         | 132.5679        | 247.1020       | 124.0546          |                |                   |      | <b>I</b>         | 2148.1511        | 1074.5792      | 2131.1245         | 1066.0659      | 2130.1495         | 1065.5739 | 19 |
| 3  | 466.2375         | 233.6474        | 449.2610       | 225.1341          |                |                   |      | <b>K</b>         | 2013.0884        | 1007.0478      | 1996.0618         | 998.5346       | 1995.0778         | 998.0425  | 18 |
| 4  | 537.3247         | 269.1660        | 520.2981       | 260.6527          |                |                   |      | <b>A</b>         | <b>1810.9294</b> | 905.9683       | 1793.9028         | 897.4550       | 1792.9188         | 896.9630  | 17 |
| 5  | 721.4458         | 361.2266        | 704.4193       | 352.7133          |                |                   |      | <b>K</b>         | <b>1739.8925</b> | 870.4498       | 1722.8657         | 861.9365       | 1721.8817         | 861.4445  | 16 |
| 6  | 849.5044         | 425.2558        | 832.4779       | 416.7426          |                |                   |      | <b>Q</b>         | <b>1555.7711</b> | 778.3892       | 1538.7445         | 769.8759       | 1537.7605         | 769.3839  | 15 |
| 7  | 962.5885         | 481.7979        | 945.5619       | 473.2948          |                |                   |      | <b>L</b>         | <b>1427.7125</b> | 714.3599       | 1410.6860         | 705.8466       | 1409.7019         | 705.3546  | 14 |
| 8  | 1049.6205        | 525.3139        | 1032.5940      | 516.8006          | 1031.6099      | 516.3086          | S    | <b>1314.6284</b> | 657.8173         | 1297.6019      | 649.3046          | 1296.6179      | 648.8126          | 13        |    |
| 9  | 1120.6576        | 560.8324        | 1103.6311      | 552.3192          | 1102.6470      | 551.8272          | A    | <b>1227.5964</b> | 614.3018         | 1210.5699      | 605.7886          | 1209.5858      | 605.2966          | 12        |    |
| 10 | 1248.7162        | 624.8617        | 1231.6896      | 616.3485          | 1230.7056      | 615.8565          | Q    | 1156.5593        | 579.7833         | 1139.5327      | 570.2700          | 1138.5487      | 569.7780          | 11        |    |
| 11 | 1335.7482        | 668.3777        | 1318.7217      | 659.8645          | 1317.7377      | 659.3725          | S    | <b>1028.5007</b> | 514.7540         | 1011.4742      | 506.2407          | 1010.4902      | 505.7487          | 10        |    |
| 12 | 1498.8115        | 749.9094        | 1481.7850      | 741.3961          | 1480.8010      | 740.9041          | Y    | 941.4687         | 471.2380         | 924.4421       | 462.7247          | 923.4581       | 462.2327          | 9         |    |
| 13 | <b>1555.8330</b> | <b>778.4201</b> | 1538.8065      | 769.9069          | 1537.8224      | 769.4149          | G    | <b>778.4054</b>  | 389.7063         | 761.3788       | 381.1930          | 760.3948       | 380.7010          | 8         |    |
| 14 | 1654.9014        | 827.9644        | 1637.8749      | 819.4411          | 1636.8909      | 818.9491          | Y    | 721.3839         | 361.1956         | 704.3673       | 352.6823          | 703.3733       | 352.1903          | 7         |    |
| 15 | 1755.9491        | 878.4782        | 1738.9226      | 869.9649          | 1737.9385      | 869.4729          | T    | <b>622.3155</b>  | 311.6614         | 605.2889       | 303.1481          | 604.3049       | 302.6561          | 6         |    |
| 16 | 1842.9811        | 921.9942        | 1825.9646      | 913.4809          | 1824.9706      | 912.9889          | S    | 521.2678         | 261.1375         | 504.2413       | 252.6243          | 503.2572       | 252.1323          | 5         |    |
| 17 | 1930.0132        | 965.5102        | 1912.9866      | 956.9969          | 1912.0026      | 956.5049          | S    | <b>434.2358</b>  | 217.6215         | 417.2092       | 209.1083          | 416.2252       | 208.6162          | 4         |    |
| 18 | 2031.0608        | 1016.0341       | 2014.0343      | 1007.5208         | 2013.0503      | 1007.0288         | T    | 347.2037         | 174.1055         | 330.1772       | 165.5922          | 329.1932       | 165.1002          | 3         |    |
| 19 | 2102.0980        | 1051.5526       | 2085.0714      | 1043.0393         | 2084.0874      | 1042.5473         | A    | 246.1561         | 123.5817         | 229.1295       | 115.0684          |                |                   | 2         |    |
| 20 |                  |                 |                |                   |                |                   | R    | 175.1190         | 88.0631          | 153.0924       | 79.5496           |                |                   | 1         |    |

MS/MS Fragmentation of **YSQADALKYVGIER**Found in **Q15910**, Histone-lysine N-methyltransferase EZH2 OS=Homo sapiens GN=EZH2 PE=1 SV=2

Match to Query 9792: 1685.890608 from(843.952580, 2+) intensity(47430.5039)

Title: File419 Spectrum12074 scans: 13797

Data file \\192.168.1.104\public\raw data\Elite\_01\methylation\_ZW\SW620\2013-06-05-SW620-Kpropio-methyl-IP-Fr9-ZW.mgf

Click mouse within plot area to zoom in by factor of two about that point

Or,   to  Da Label all possible matches  Label matches used for scoring 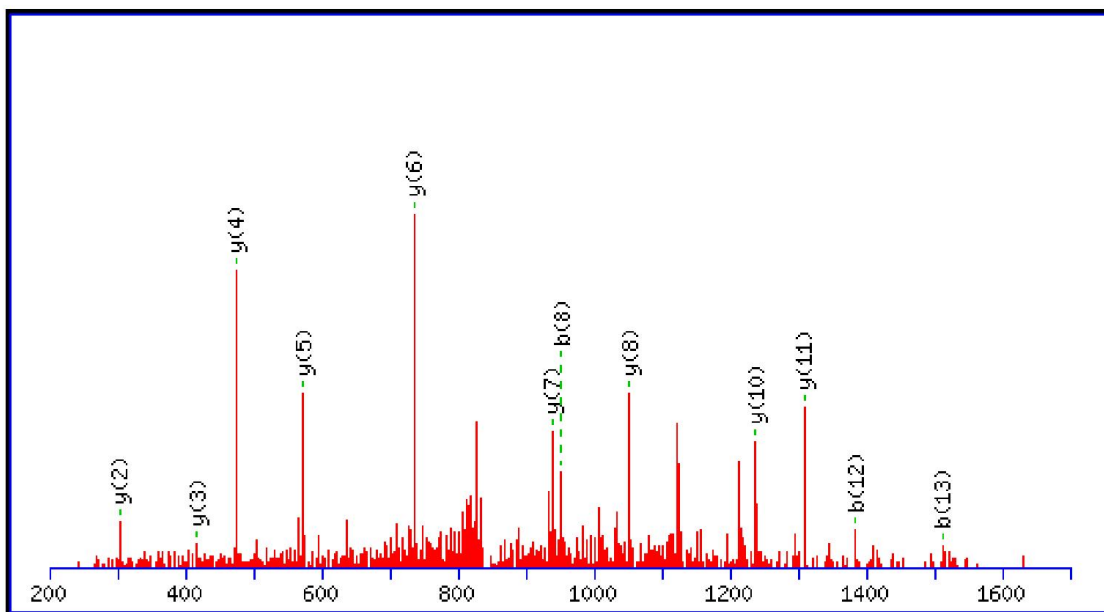Monoisotopic mass of neutral peptide **Mr(calc): 1685.8897**

Fixed modifications: Carbamidomethyl (C) (apply to specified residues only)

Variable modifications:

**K8** : Propionyl-(13CD3)Methyl (K)

Ions Score: 85 Expect: 1.6e-006

Matches : 12/148 fragment ions using 14 most intense peaks ([help](#))

| #  | b         | b <sup>++</sup> | b*        | b <sup>++</sup> | b <sup>0</sup> | b <sup>0++</sup> | Seq. | y         | y <sup>++</sup> | y*        | y <sup>++</sup> | y <sup>0</sup> | y <sup>0++</sup> | #  |
|----|-----------|-----------------|-----------|-----------------|----------------|------------------|------|-----------|-----------------|-----------|-----------------|----------------|------------------|----|
| 1  | 164.0706  | 82.5389         |           |                 |                |                  | Y    |           |                 |           |                 |                |                  | 14 |
| 2  | 251.1026  | 126.0550        |           |                 | 233.0921       | 117.0497         | S    | 1523.8337 | 762.4205        | 1506.8071 | 753.9072        | 1505.8231      | 753.4152         | 13 |
| 3  | 379.1612  | 190.0842        | 362.1347  | 181.5710        | 361.1506       | 181.0790         | Q    | 1436.8016 | 718.9045        | 1419.7751 | 710.3912        | 1418.7911      | 709.8992         | 12 |
| 4  | 450.1983  | 225.6028        | 433.1718  | 217.0895        | 432.1878       | 216.5975         | A    | 1308.7431 | 654.8752        | 1291.7165 | 646.3619        | 1290.7325      | 645.8699         | 11 |
| 5  | 565.2253  | 283.1163        | 548.1987  | 274.6030        | 547.2147       | 274.1120         | D    | 1237.7059 | 619.3566        | 1220.6794 | 610.8453        | 1219.6954      | 610.3513         | 10 |
| 6  | 636.2624  | 318.6348        | 619.2358  | 310.1216        | 618.2518       | 309.6295         | A    | 1122.6790 | 561.8431        | 1105.6825 | 553.3299        | 1104.6684      | 552.8379         | 9  |
| 7  | 749.3464  | 375.1769        | 732.3199  | 366.6636        | 731.3359       | 366.1716         | L    | 1051.6419 | 526.3246        | 1034.6153 | 517.8113        | 1033.6313      | 517.3193         | 8  |
| 8  | 951.5055  | 476.2564        | 934.4789  | 467.7431        | 933.4949       | 467.2511         | K    | 938.5578  | 469.7826        | 921.5313  | 461.2693        | 920.5473       | 460.7773         | 7  |
| 9  | 1114.5688 | 557.7880        | 1097.5422 | 549.2748        | 1096.5582      | 548.7827         | Y    | 736.3988  | 368.7030        | 719.3723  | 360.1898        | 718.3883       | 359.6978         | 6  |
| 10 | 1213.6372 | 607.3222        | 1196.6107 | 598.8090        | 1195.6266      | 598.3170         | V    | 573.3355  | 287.1714        | 556.3089  | 278.6581        | 555.3249       | 278.1661         | 5  |
| 11 | 1270.6587 | 635.8330        | 1253.6321 | 627.3197        | 1252.6481      | 626.8277         | G    | 474.2671  | 237.6372        | 457.2405  | 229.1239        | 456.2565       | 228.6319         | 4  |
| 12 | 1383.7427 | 692.3750        | 1366.7162 | 683.8617        | 1365.7322      | 683.3697         | I    | 417.2456  | 209.1264        | 400.2191  | 200.6132        | 399.2350       | 200.1212         | 3  |
| 13 | 1512.7853 | 756.8963        | 1495.7588 | 748.3830        | 1494.7748      | 747.8910         | E    | 304.1615  | 152.5844        | 287.1350  | 144.0711        | 286.1510       | 143.5791         | 2  |
| 14 |           |                 |           |                 |                |                  | R    | 175.1190  | 88.0631         | 158.0924  | 79.5498         |                |                  | 1  |

MS/MS Fragmentation of **LKQQSELQSQVR**Found in **C9J9W2**, LIM and SH3 domain protein 1 (Fragment) OS=Homo sapiens GN=LASPI PE=2 SV=1

Match to Query 7819: 1516.847868 from(759.431210, 2+) intensity(891431.9375)

Title: File660 Spectrum4849 scans: 5963

Data file \\192.168.1.104\public\raw data\Elite\_01\methylation\_ZW\SW620\2013-6-18-SW620-Kpropio-methyl-IP-Fr3-ZW.mgf

Click mouse within plot area to zoom in by factor of two about that point

Or,   to  Da Label all possible matches  Label matches used for scoring 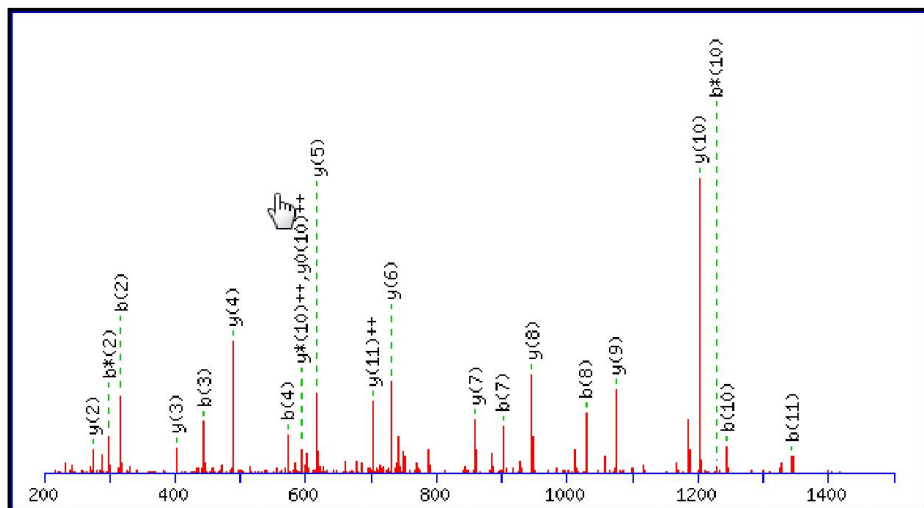**Monoisotopic mass of neutral peptide Mr(calc):** 1516.8482**Fixed modifications:** Carbamidomethyl (C) (apply to specified residues or termini only)**Variable modifications:****K2** : Propionyl-(13CD3)Methyl (K)**Ions Score:** 78 **Expect:** 8.6e-006**Matches** : 21/116 fragment ions using 25 most intense peaks ([help](#))

| #  | b                | b <sup>++</sup> | b <sup>*</sup>   | b <sup>+++</sup> | b <sup>0</sup> | b <sup>0++</sup> | Seq. | y                | y <sup>++</sup> | y <sup>*</sup> | y <sup>+++</sup> | y <sup>0</sup> | y <sup>0++</sup> | #  |
|----|------------------|-----------------|------------------|------------------|----------------|------------------|------|------------------|-----------------|----------------|------------------|----------------|------------------|----|
| 1  | 114.0913         | 57.5493         |                  |                  |                |                  | L    |                  |                 |                |                  |                |                  | 12 |
| 2  | <b>316.2504</b>  | 158.6288        | <b>299.2238</b>  | 150.1155         |                |                  | K    | 1404.7714        | <b>702.8893</b> | 1387.7449      | 694.3761         | 1386.7608      | 693.8841         | 11 |
| 3  | <b>444.3089</b>  | 222.6581        | 427.2824         | 214.1448         |                |                  | Q    | <b>1202.6124</b> | 601.8098        | 1185.5858      | <b>593.2966</b>  | 1184.6018      | <b>592.8046</b>  | 10 |
| 4  | <b>572.3675</b>  | 286.6874        | 555.3410         | 278.1741         |                |                  | Q    | <b>1074.5538</b> | 537.7805        | 1057.5273      | 529.2673         | 1056.5432      | 528.7753         | 9  |
| 5  | 659.3995         | 330.2034        | 642.3730         | 321.6901         | 641.3890       | 321.1981         | S    | <b>946.4952</b>  | 473.7513        | 929.4687       | 465.2380         | 928.4847       | 464.7460         | 8  |
| 6  | 788.4421         | 394.7247        | 771.4156         | 386.2114         | 770.4316       | 385.7194         | E    | <b>859.4632</b>  | 430.2352        | 842.4367       | 421.7220         | 841.4526       | 421.2300         | 7  |
| 7  | <b>901.5262</b>  | 451.2667        | 884.4996         | 442.7535         | 883.5156       | 442.2615         | L    | <b>730.4206</b>  | 365.7139        | 713.3941       | 357.2007         | 712.4100       | 356.7087         | 6  |
| 8  | <b>1029.5848</b> | 515.2960        | 1012.5582        | 506.7827         | 1011.5742      | 506.2907         | Q    | <b>617.3366</b>  | 309.1719        | 600.3100       | 300.6586         | 599.3260       | 300.1666         | 5  |
| 9  | 1116.6168        | 558.8120        | 1099.5903        | 550.2988         | 1098.6062      | 549.8068         | S    | <b>489.2780</b>  | 245.1426        | 472.2514       | 236.6293         | 471.2674       | 236.1373         | 4  |
| 10 | <b>1244.6754</b> | 622.8413        | <b>1227.6488</b> | 614.3281         | 1226.6648      | 613.8360         | Q    | <b>402.2459</b>  | 201.6266        | 385.2194       | 193.1133         |                |                  | 3  |
| 11 | <b>1343.7438</b> | 672.3755        | 1326.7172        | 663.8623         | 1325.7332      | 663.3703         | V    | <b>274.1874</b>  | 137.5973        | 257.1608       | 129.0840         |                |                  | 2  |
| 12 |                  |                 |                  |                  |                |                  | R    | 175.1190         | 88.0631         | 158.0924       | 79.5498          |                |                  | 1  |

Found in **J3KPX7**, Prohibitin-2 OS=Homo sapiens GN=PHB2 PE=4 SV=1

Match to Query 3718: 1200.673808 from(601.344180, 2+) intensity(782513.6875)

Title: File440 Spectrum14076 scans: 15700

Data file \\192.168.1.104\public\raw data\Elite\_01\methylation\_ZW\SW620\2013-6-5-SW620-Kpropio-methyl-IP-Fr11-ZW.mgf

Click mouse within plot area to zoom in by factor of two about that point

Or,   to  Da Label all possible matches  Label matches used for scoring 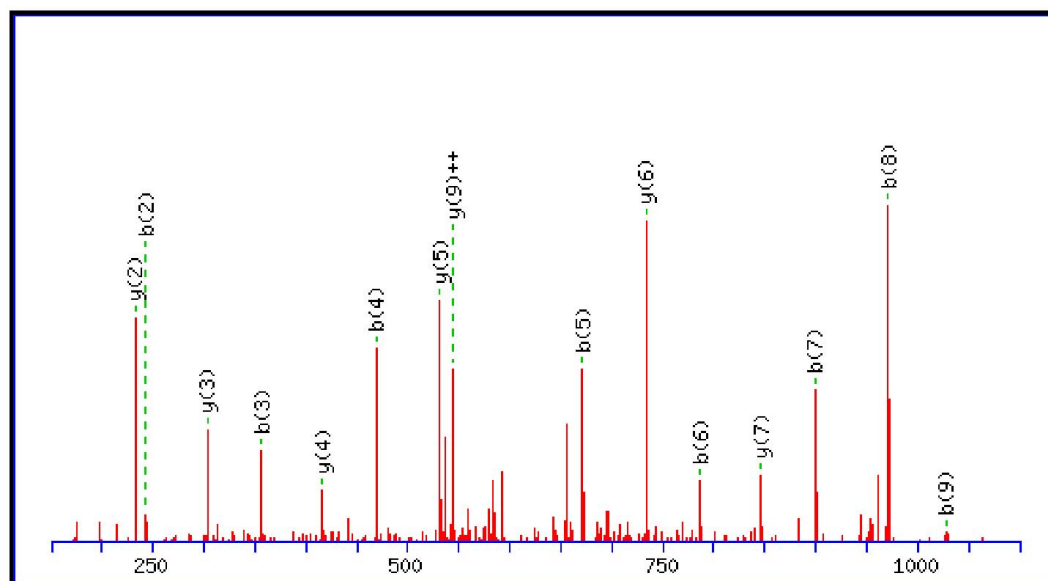**Monoisotopic mass of neutral peptide Mr(calc):** 1200.6735**Fixed modifications:** Carbamidomethyl (C) (apply to specified residues or termini only)**Variable modifications:****N-term :** Acetyl (Protein N-term)**K5 :** Propionyl-(13CD3)Methyl (K)**Ions Score:** 73 **Expect:** 2.3e-005**Matches :** 15/88 fragment ions using 18 most intense peaks

| #  | b                | b <sup>++</sup> | b*        | b <sup>+++</sup> | b <sup>0</sup> | b <sup>0++</sup> | Seq. | y               | y <sup>++</sup> | y*        | y <sup>+++</sup> | y <sup>0</sup> | y <sup>0++</sup> | #  |
|----|------------------|-----------------|-----------|------------------|----------------|------------------|------|-----------------|-----------------|-----------|------------------|----------------|------------------|----|
| 1  | 114.0550         | 57.5311         |           |                  |                |                  | A    |                 |                 |           |                  |                |                  | 10 |
| 2  | <b>242.1135</b>  | 121.5604        | 225.0870  | 113.0471         |                |                  | Q    | 1088.6331       | <b>544.8202</b> | 1071.6066 | 536.3069         | 1070.6226      | 535.8149         | 9  |
| 3  | <b>356.1565</b>  | 178.5819        | 339.1299  | 170.0686         |                |                  | N    | 960.5745        | 480.7909        | 943.5480  | 472.2776         | 942.5640       | 471.7856         | 8  |
| 4  | <b>469.2405</b>  | 235.1239        | 452.2140  | 226.6106         |                |                  | L    | <b>846.5316</b> | 423.7694        | 829.5051  | 415.2562         | 828.5210       | 414.7642         | 7  |
| 5  | <b>671.3995</b>  | 336.2034        | 654.3730  | 327.6901         |                |                  | K    | <b>733.4476</b> | 367.2274        | 716.4210  | 358.7141         | 715.4370       | 358.2221         | 6  |
| 6  | <b>786.4265</b>  | 393.7169        | 769.3999  | 385.2036         | 768.4159       | 384.7116         | D    | <b>531.2885</b> | 266.1479        | 514.2620  | 257.6346         | 513.2780       | 257.1426         | 5  |
| 7  | <b>899.5105</b>  | 450.2589        | 882.4840  | 441.7456         | 881.5000       | 441.2536         | L    | <b>416.2616</b> | 208.6344        | 399.2350  | 200.1212         |                |                  | 4  |
| 8  | <b>970.5477</b>  | 485.7775        | 953.5211  | 477.2642         | 952.5371       | 476.7722         | A    | <b>303.1775</b> | 152.0924        | 286.1510  | 143.5791         |                |                  | 3  |
| 9  | <b>1027.5691</b> | 514.2882        | 1010.5426 | 505.7749         | 1009.5586      | 505.2829         | G    | <b>232.1404</b> | 116.5738        | 215.1139  | 108.0606         |                |                  | 2  |
| 10 |                  |                 |           |                  |                |                  | R    | 175.1190        | 88.0631         | 158.0924  | 79.5498          |                |                  | 1  |

MS/MS Fragmentation of **EATLKMAQLADSPR**

Found in **Q9NRJ4**, Tubby-related protein 4 OS=Homo sapiens GN=TULP4 PE=2 SV=2

Match to Query 9788: 1607.872408 from(804.943480, 2+) intensity(66701.1953)

Title: File394 Spectrum13004 scans: 14506

Data file \\192.168.1.104\public\raw data\Elite\_01\methylation\_ZW\SW620\2013-5-16-620-Kpropio-methyl-IP-Fr8-ZW.mgf

Click mouse within plot area to zoom in by factor of two about that point

Or,   to  Da

Label all possible matches  Label matches used for scoring

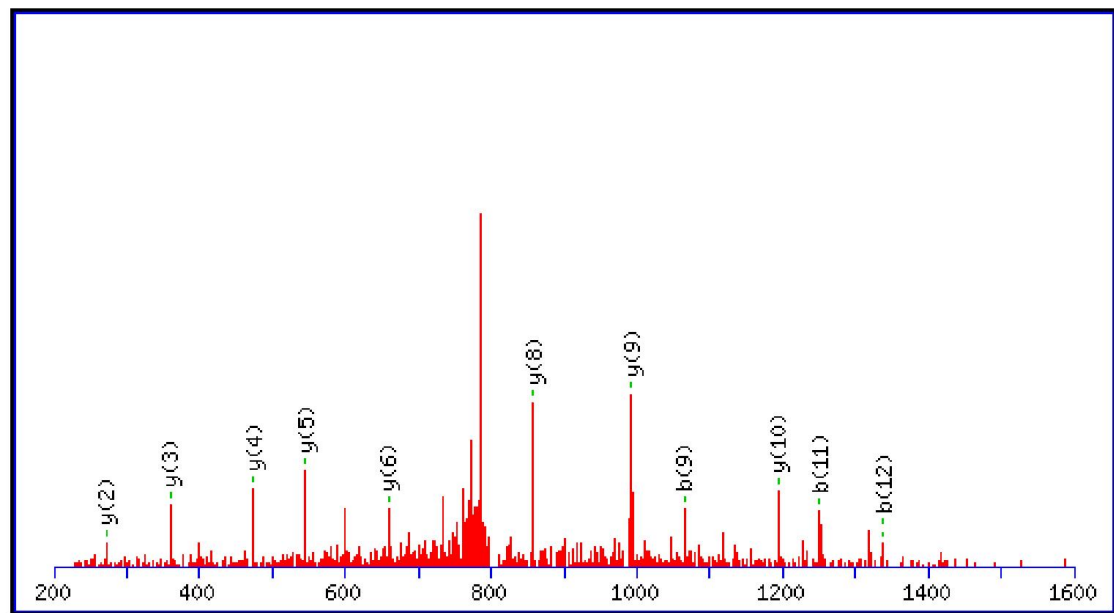

**Monoisotopic mass of neutral peptide Mr(calc): 1607.8734**

**Fixed modifications:** Carbamidomethyl (C) (apply to specified residues or

**Variable modifications:**

**K5** : Propionyl-(13CD3)Methyl (K)

**M6** : Label:13C(1)2H(3) (M)

**Ions Score: 70 Expect: 5.9e-005**

**Matches : 11/144 fragment ions using 14 most intense peaks** ([help](#))

| #  | b                | b <sup>++</sup> | b*        | b <sup>++</sup> | b <sup>0</sup> | b <sup>0++</sup> | Seq. | y                | y <sup>++</sup> | y*        | y <sup>++</sup> | y <sup>0</sup> | y <sup>0++</sup> | #  |
|----|------------------|-----------------|-----------|-----------------|----------------|------------------|------|------------------|-----------------|-----------|-----------------|----------------|------------------|----|
| 1  | 130.0499         | 65.5286         |           |                 | 112.0393       | 56.5233          | K    |                  |                 |           |                 |                |                  | 14 |
| 2  | 201.0870         | 101.0471        |           |                 | 183.0764       | 92.0418          | A    | 1479.8381        | 740.4227        | 1462.8115 | 731.9094        | 1461.8275      | 731.4174         | 13 |
| 3  | 302.1347         | 151.5710        |           |                 | 284.1241       | 142.5657         | T    | 1408.8010        | 704.9041        | 1391.7744 | 696.3909        | 1390.7904      | 695.8988         | 12 |
| 4  | 415.2187         | 208.1130        |           |                 | 397.2082       | 199.1077         | L    | 1307.7533        | 654.3803        | 1290.7268 | 645.8670        | 1289.7427      | 645.3750         | 11 |
| 5  | 617.3777         | 308.1925        | 600.3512  | 300.6792        | 599.3672       | 300.1872         | K    | <b>1194.6692</b> | 597.8383        | 1177.6427 | 589.3250        | 1176.6587      | 588.8330         | 10 |
| 6  | 752.4404         | 376.7238        | 735.4139  | 368.2106        | 734.4298       | 367.7186         | N    | <b>992.5102</b>  | 496.7588        | 975.4837  | 488.2455        | 974.4997       | 487.7535         | 9  |
| 7  | 823.4775         | 412.2424        | 806.4510  | 403.7291        | 805.4670       | 403.2371         | A    | <b>857.4476</b>  | 423.2274        | 840.4210  | 420.7141        | 839.4370       | 420.2221         | 8  |
| 8  | 951.5361         | 476.2717        | 934.5096  | 467.7584        | 933.5255       | 467.2664         | Q    | 796.4104         | 393.7089        | 769.3839  | 385.1956        | 768.3999       | 384.7036         | 7  |
| 9  | <b>1064.6202</b> | 532.8137        | 1047.5936 | 524.3004        | 1046.6096      | 523.8084         | L    | <b>658.3519</b>  | 329.6796        | 641.3253  | 321.1663        | 640.3413       | 320.6743         | 6  |
| 10 | 1135.6573        | 568.3328        | 1118.6307 | 559.8190        | 1117.6467      | 559.3270         | A    | <b>545.2678</b>  | 273.1375        | 528.2413  | 264.6243        | 527.2572       | 264.1823         | 5  |
| 11 | <b>1250.6842</b> | 625.8457        | 1233.6577 | 617.3325        | 1232.6737      | 616.8405         | D    | <b>474.8307</b>  | 237.6190        | 457.2041  | 229.1057        | 456.2201       | 228.6137         | 4  |
| 12 | <b>1337.7163</b> | 669.3618        | 1320.6897 | 660.8485        | 1319.7057      | 660.3565         | S    | <b>359.2037</b>  | 180.1055        | 342.1772  | 171.5922        | 341.1932       | 171.1002         | 3  |
| 13 | 1434.7690        | 717.8881        | 1417.7425 | 709.3749        | 1416.7584      | 708.8829         | P    | <b>272.1717</b>  | 136.5895        | 265.1452  | 128.0762        | 264.1388       | 127.5622         | 2  |
| 14 |                  |                 |           |                 |                |                  | R    | 175.1190         | 88.0631         | 158.0924  | 79.5498         |                |                  | 1  |

Found in **Q9BQ61**, Uncharacterized protein C19orf43 OS=Homo sapiens GN=C19orf43 PE=1 SV=1

Match to Query 8650: 1519.860928 from(760.937740,2+) intensity(65464.1211)

Title: File649 Spectrum13509 scans: 14933

Data file \\192.168.1.104\public\raw data\Elite\_01\methylation\_ZW\SW620\2013-6-18-SW620-Kpropio-methyl-IP-Fr20-ZW.mgf

Click mouse within plot area to zoom in by factor of two about that point

Or,   to  Da Label all possible matches  Label matches used for scoring 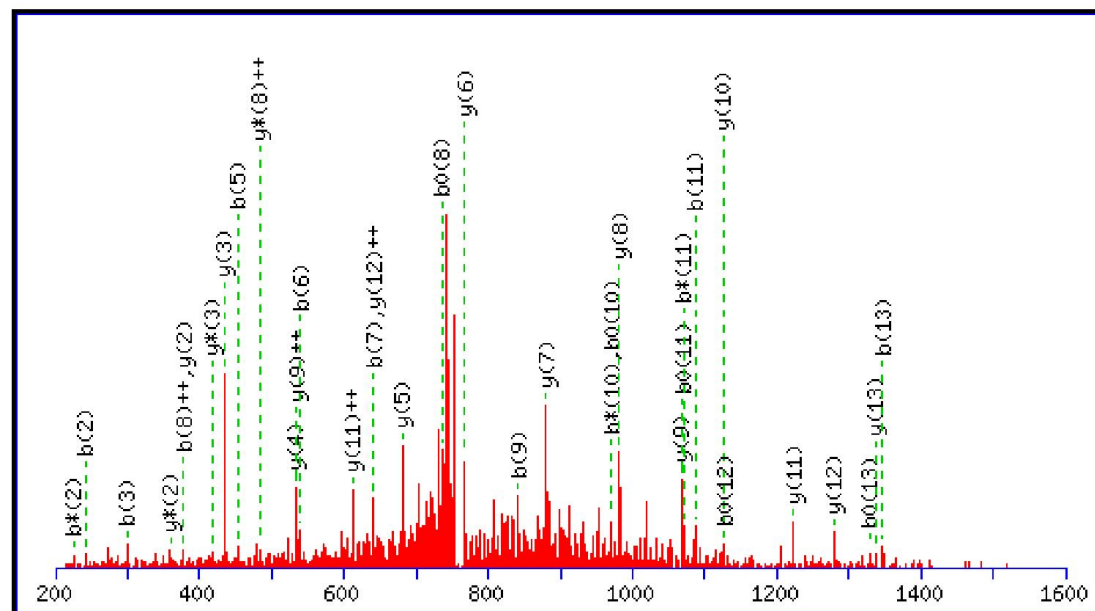Monoisotopic mass of neutral peptide **Mr(calc): 1519.8631**

Fixed modifications: Carbamidomethyl (C) (apply to specified residues or

Variable modifications:

K1 : Propionyl (K)

K13 : Propionyl-(13CD3)Methyl (K)

Ions Score: 69 Expect: 5.2e-005

Matches : 35/136 fragment ions using 78 most intense peaks [\(help\)](#)

| #  | b                | b <sup>++</sup> | b <sup>*</sup>   | b <sup>+++</sup> | b <sup>0</sup>   | b <sup>0++</sup> | Seq.     | y                | y <sup>++</sup>  | y <sup>*</sup>  | y <sup>+++</sup> | y <sup>0</sup> | y <sup>0++</sup> | #        |
|----|------------------|-----------------|------------------|------------------|------------------|------------------|----------|------------------|------------------|-----------------|------------------|----------------|------------------|----------|
| 1  | 185.1285         | 95.0679         | 168.1019         | 84.5546          |                  |                  |          |                  |                  |                 |                  |                |                  | 14       |
| 2  | <b>242.1499</b>  | 121.6786        | <b>225.1234</b>  | 113.0653         |                  |                  |          | <b>G</b>         | <b>1336.7492</b> | 668.8782        | 1319.7227        | 660.3650       | 1318.7396        | 659.8730 |
| 3  | <b>299.1714</b>  | 150.0893        | 282.1448         | 141.5761         |                  |                  |          | <b>G</b>         | <b>1279.7277</b> | <b>640.3675</b> | 1262.7012        | 631.8542       | 1261.7172        | 631.3622 |
| 4  | 396.2241         | 198.6157        | 379.1976         | 190.1024         |                  |                  |          | <b>P</b>         | <b>1222.7063</b> | <b>611.8568</b> | 1205.6797        | 603.3455       | 1204.6957        | 602.8515 |
| 5  | <b>453.2456</b>  | 227.1264        | 436.2191         | 218.6132         |                  |                  |          | <b>G</b>         | <b>1125.6535</b> | 563.3304        | 1108.6270        | 554.8171       | 1107.6430        | 554.3251 |
| 6  | <b>540.2776</b>  | 270.6426        | 523.2511         | 262.1292         | 522.2671         | 261.6372         | <b>S</b> | <b>1068.6321</b> | <b>534.8197</b>  | 1051.6055       | 526.3064         | 1050.6215      | 525.8144         |          |
| 7  | <b>641.3253</b>  | 321.1663        | 624.2988         | 312.6530         | 623.3148         | 312.1610         | <b>T</b> | <b>981.6002</b>  | 491.3037         | 964.5735        | <b>482.7904</b>  | 963.5895       | 482.2984         |          |
| 8  | 764.4094         | <b>377.7083</b> | 737.3828         | 369.1951         | <b>736.3988</b>  | 368.7030         | <b>L</b> | <b>880.5523</b>  | 440.7798         | 863.5258        | 452.2665         | 862.5418       | 451.7745         |          |
| 9  | <b>841.4414</b>  | 421.2245        | 824.4149         | 412.7111         | 823.4308         | 412.2191         | <b>S</b> | <b>767.4683</b>  | 384.2378         | 750.4417        | 375.7245         | 749.4577       | 375.2325         |          |
| 10 | 988.5098         | 494.7585        | <b>971.4833</b>  | 486.2453         | <b>970.4993</b>  | 485.7533         | <b>F</b> | <b>680.4363</b>  | 340.7218         | 663.4097        | 332.2085         |                |                  |          |
| 11 | <b>1087.5782</b> | 544.2928        | <b>1070.5517</b> | 535.7795         | <b>1069.5677</b> | 535.2875         | <b>V</b> | <b>533.3678</b>  | 267.1876         | 516.3413        | 258.6743         |                |                  |          |
| 12 | 1144.5997        | 572.8035        | 1127.5732        | 564.2902         | <b>1126.5891</b> | 563.7982         | <b>G</b> | <b>434.2994</b>  | 217.6534         | <b>417.2729</b> | 209.1401         |                |                  |          |
| 13 | <b>1346.7587</b> | 673.8830        | 1329.7322        | 665.3697         | <b>1328.7481</b> | 664.8777         | <b>K</b> | <b>377.2780</b>  | 189.1426         | <b>360.2614</b> | 180.6293         |                |                  |          |
| 14 |                  |                 |                  |                  |                  |                  | <b>R</b> | 175.1190         | 88.0631          | 158.0924        | 79.5498          |                |                  |          |



Match to Query 9012: 1684.978848 from(843.496700,2+) intensity(83880.1172)

Title: File667 Spectrum11996 scans: 13910

Data file \\192.168.1.104\public\raw data\Elite\_01\methylation\_ZW\SW620\2013-6-18-SW620-Kpropio-methyl-IP-Fr18-ZW.mgf

Click mouse within plot area to zoom in by factor of two about that point

Or,   to  Da

Label all possible matches  Label matches used for scoring

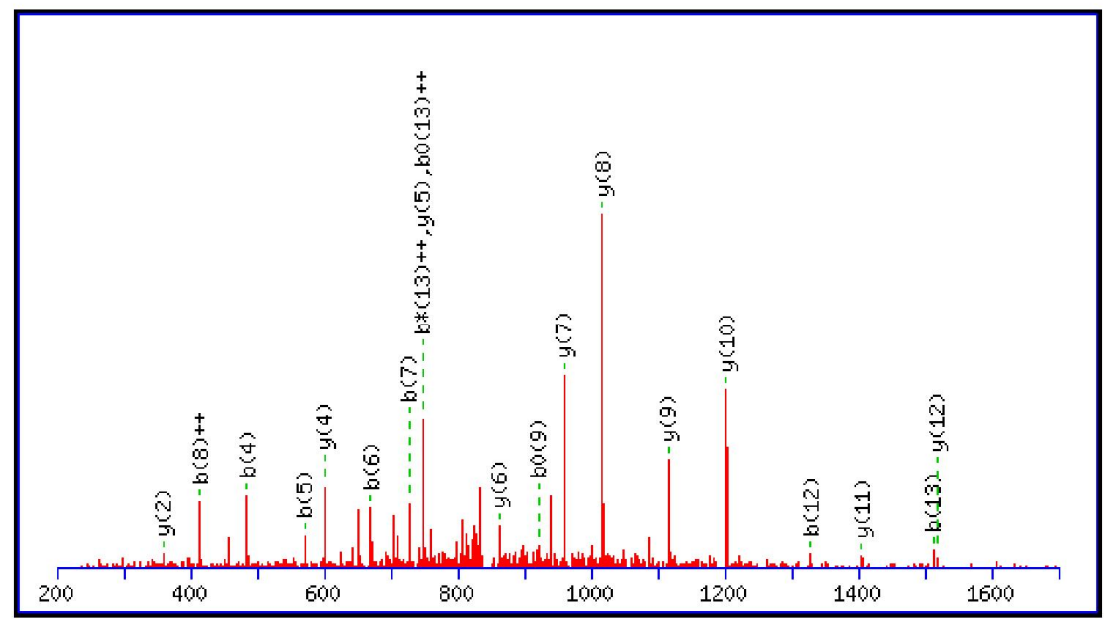

**Monoisotopic mass of neutral peptide Mr(calc):** 1684.9785  
**Fixed modifications:** Carbamidomethyl (C) (apply to specified residues or  
**Variable modifications:**  
**K4** : Propionyl-(13CD3)Methyl (K)  
**K12** : Propionyl (K)  
**K13** : Propionyl (K)  
**Ions Score:** 68 **Expect:** 5.1e-005  
**Matches :** 20/132 fragment ions using 30 most intense peaks [\(help\)](#)

| #  | b                | b <sup>++</sup> | b*        | b <sup>+++</sup> | b <sup>0</sup>  | b <sup>0++</sup> | Seq. | y                | y <sup>++</sup> | y*        | y <sup>+++</sup> | y <sup>0</sup> | y <sup>0++</sup> | #  |
|----|------------------|-----------------|-----------|------------------|-----------------|------------------|------|------------------|-----------------|-----------|------------------|----------------|------------------|----|
| 1  | 72.0444          | 96.5258         |           |                  |                 |                  | A    |                  |                 |           |                  |                |                  | 14 |
| 2  | 169.0972         | 85.0522         |           |                  |                 |                  | P    | 1614.9486        | 807.9780        | 1597.9221 | 799.4647         | 1596.9381      | 798.9727         | 13 |
| 3  | 282.1812         | 141.5942        |           |                  |                 | I                | L    | <b>1517.8959</b> | 759.4516        | 1500.8693 | 750.9383         | 1499.8853      | 750.4463         | 12 |
| 4  | <b>484.3402</b>  | 242.6738        | 467.3137  | 234.1605         |                 |                  | K    | <b>1404.8118</b> | 702.9095        | 1387.7853 | 694.3963         | 1386.8012      | 693.9043         | 11 |
| 5  | <b>571.3723</b>  | 286.1898        | 554.3457  | 277.6765         | 553.3617        | 277.1845         | S    | <b>1202.6528</b> | 601.8300        | 1185.6263 | 593.3168         | 1184.6422      | 592.8248         | 10 |
| 6  | <b>670.4407</b>  | 335.7290        | 653.4141  | 327.2107         | 652.4301        | 326.7187         | V    | <b>1115.6208</b> | 558.3140        | 1098.5942 | 549.8007         | 1097.6102      | 549.3087         | 9  |
| 7  | <b>727.4621</b>  | 364.2347        | 710.4356  | 355.7214         | 709.4516        | 355.2294         | G    | <b>1016.5524</b> | 508.7798        | 999.5258  | 500.2665         | 998.5418       | 499.7745         | 8  |
| 8  | 824.5149         | <b>412.7611</b> | 807.4884  | 404.2478         | 806.5043        | 403.7558         | P    | <b>959.5309</b>  | 480.2691        | 942.5043  | 471.7558         | 941.5203       | 471.2638         | 7  |
| 9  | 939.5418         | 470.2746        | 922.5153  | 461.7613         | <b>921.5313</b> | 461.2693         | D    | <b>862.4781</b>  | 431.7427        | 845.4516  | 423.2294         | 844.4676       | 422.7374         | 6  |
| 10 | 1086.6103        | 543.8088        | 1069.5837 | 535.2955         | 1068.5997       | 534.8035         | F    | <b>747.4512</b>  | 374.2292        | 730.4246  | 365.7160         |                |                  | 5  |
| 11 | 1143.6517        | 572.3195        | 1126.6052 | 563.8062         | 1125.6212       | 563.3142         | G    | <b>600.3828</b>  | 300.6950        | 583.3562  | 292.1817         |                |                  | 4  |
| 12 | <b>1327.7529</b> | 664.3801        | 1310.7264 | 655.8668         | 1309.7423       | 655.3748         | K    | 543.3613         | 272.1843        | 526.3348  | 263.6710         |                |                  | 3  |
| 13 | <b>1511.8741</b> | 756.4407        | 1494.8475 | <b>747.9274</b>  | 1493.8635       | <b>747.4354</b>  | K    | <b>359.2401</b>  | 180.1237        | 342.2136  | 171.6104         |                |                  | 2  |
| 14 |                  |                 |           |                  |                 |                  | R    | 175.1190         | 88.0631         | 158.0924  | 79.5498          |                |                  | 1  |

MS/MS Fragmentation of **SGPSDHDLKPNAAIR**

Found in **A8MYT4**, Phosphatidylinositol 3-kinase catalytic subunit type 3 OS=Homo sapiens GN=PIK3C3 PE=2 SV=2

Match to Query 8779: 1638.823708 from(820.419130,2+) intensity(147951.2969)

Title: File386 Spectrum6160 scans: 7108

Data file \\192.168.1.104\public\raw data\Elite\_01\methylation\_ZW\SW620\2013-5-16-620-Kpropio-methyl-IP-Frl4-ZW.mgf

Click mouse within plot area to zoom in by factor of two about that point

Or,   to  Da

Label all possible matches  Label matches used for scoring

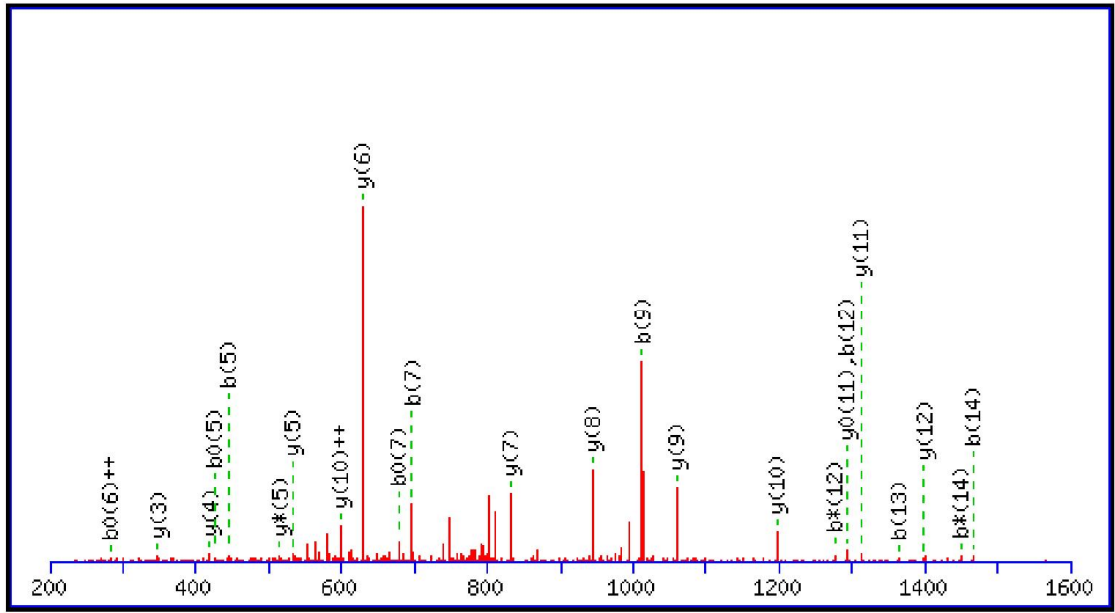

**Monoisotopic mass of neutral peptide Mr(calc): 1638.8234**

**Fixed modifications:** Carbamidomethyl (C) (apply to specified residues only)

**Variable modifications:**

**K9** : Propionyl-(13CD3)Methyl (K)

**Ions Score: 67 Expect: 7.4e-005**

**Matches : 24/150 fragment ions using 40 most intense peaks** ([help](#))

| #  | b                | b <sup>++</sup> | b*               | b <sup>+++</sup> | b <sup>0</sup>  | b <sup>0++</sup> | Seq. | y                | y <sup>++</sup> | y*              | y <sup>+++</sup> | y <sup>0</sup>   | y <sup>0++</sup> | #  |
|----|------------------|-----------------|------------------|------------------|-----------------|------------------|------|------------------|-----------------|-----------------|------------------|------------------|------------------|----|
| 1  | 88.0393          | 44.5233         |                  |                  | 70.0287         | 95.5190          | S    |                  |                 |                 |                  |                  |                  | 15 |
| 2  | 145.0608         | 73.0340         |                  |                  | 127.0502        | 64.0287          | G    | 1552.7987        | 776.9030        | 1536.7721       | 768.3897         | 1534.7881        | 767.8977         | 14 |
| 3  | 242.1135         | 121.5604        |                  |                  | 224.1030        | 112.5551         | P    | 1495.7772        | 748.3922        | 1478.7507       | 739.8790         | 1477.7667        | 739.3870         | 13 |
| 4  | 329.1456         | 165.0764        |                  |                  | 311.1350        | 156.0711         | S    | <b>1398.7245</b> | 699.8659        | 1381.6979       | 691.3526         | 1380.7139        | 690.8606         | 12 |
| 5  | <b>444.1725</b>  | 222.5899        |                  |                  | <b>426.1619</b> | 213.5846         | D    | <b>1311.6924</b> | 656.3499        | 1294.6659       | 647.8366         | <b>1293.6819</b> | 647.3448         | 11 |
| 6  | 581.2314         | 291.1193        |                  |                  | 563.2209        | <b>282.1141</b>  | H    | <b>1196.6655</b> | <b>598.8364</b> | 1179.6389       | 590.3231         | 1178.6549        | 589.8311         | 10 |
| 7  | <b>696.2584</b>  | 348.6328        |                  |                  | <b>678.2478</b> | 339.6275         | D    | <b>1059.6066</b> | 530.3069        | 1042.5800       | 521.7936         | 1041.5960        | 521.3016         | 9  |
| 8  | 809.3424         | 405.1748        |                  |                  | 791.3319        | 396.1696         | L    | <b>944.5796</b>  | 472.7935        | 927.5531        | 464.2802         | 926.5691         | 463.7882         | 8  |
| 9  | <b>1011.5014</b> | 506.2544        | 994.4749         | 497.7411         | 993.4909        | 497.2491         | K    | <b>831.4956</b>  | 416.2514        | 814.4690        | 407.7381         | 813.4850         | 407.2461         | 7  |
| 10 | 1108.5542        | 554.7807        | 1091.5277        | 546.2675         | 1090.5436       | 545.7755         | P    | <b>629.3365</b>  | 315.1719        | 612.3100        | 306.6586         | 611.3260         | 306.1666         | 6  |
| 11 | 1222.5971        | 611.8022        | 1205.5706        | 603.2889         | 1204.5866       | 602.7969         | N    | <b>532.2836</b>  | 266.6455        | <b>515.2572</b> | 258.1323         | 514.2732         | 257.6402         | 5  |
| 12 | <b>1293.6342</b> | 647.3208        | <b>1276.6071</b> | 638.8075         | 1275.6237       | 638.3155         | A    | <b>418.2409</b>  | 209.6241        | 401.2143        | 201.1108         | 400.2303         | 200.6193         | 4  |
| 13 | <b>1364.6714</b> | 682.8393        | 1347.6448        | 674.3260         | 1346.6608       | 673.8340         | A    | <b>347.2037</b>  | 174.1055        | 330.1772        | 165.5922         | 329.1932         | 165.1002         | 3  |
| 14 | <b>1465.7190</b> | 733.3632        | <b>1448.6925</b> | 724.8499         | 1447.7085       | 724.3579         | T    | 276.1666         | 138.5870        | 259.1401        | 130.0737         | 258.1561         | 129.5817         | 2  |
| 15 |                  |                 |                  |                  |                 |                  | R    | 175.1190         | 88.0631         | 168.0924        | 79.5498          |                  |                  | 1  |

MS/MS Fragmentation of **TDDGKGLGMQLKGPLGPGGR**Found in **Q9NQS1**, Cell death regulator Aven OS=Homo sapiens GN=AVEN PE=1 SV=1

Match to Query 15036: 2087.123148 from(1044.568850, 2+) intensity(67384.5625)

Title: File658 Spectrum13479 scans: 15088

Data file \\192.168.1.104\public\raw data\Elite\_01\methylation\_ZW\SW620\2013-6-18-SW620-Kpropio-methyl-IP-Fr17-ZW.mgf

Click mouse within plot area to zoom in by factor of two about that point

Or,   to  Da Label all possible matches  Label matches used for scoring 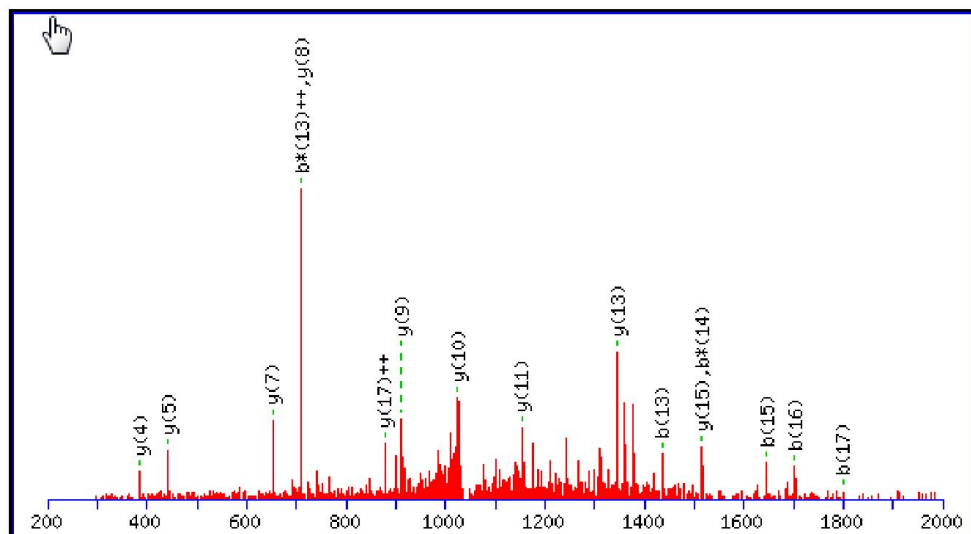**Monoisotopic mass of neutral peptide Mr(calc):** 2087.1227**Fixed modifications:** Carbamidomethyl (C) (apply to specified residues or termini only)**Variable modifications:****K5** : Propionyl (K)**M9** : Label:13C(1)2H(3) (M)**K12** : Propionyl-(13CD3)Methyl (K)**Ions Score:** 67 **Expect:** 0.00014**Matches** : 16/186 fragment ions using 17 most intense peaks ([help](#))

| #  | b                | b <sup>++</sup> | b <sup>+</sup>   | b <sup>0</sup>  | b <sup>0</sup> | Seq.     | y        | y <sup>++</sup>  | y <sup>+</sup>  | y <sup>++</sup> | y <sup>0</sup> | y <sup>0</sup> | #        |
|----|------------------|-----------------|------------------|-----------------|----------------|----------|----------|------------------|-----------------|-----------------|----------------|----------------|----------|
| 1  | 102.0550         | 51.5311         |                  |                 | 84.0444        | 42.5258  | <b>T</b> |                  |                 |                 |                |                | 20       |
| 2  | 217.0819         | 109.0446        |                  |                 | 199.0713       | 100.0393 | <b>D</b> | 1987.0822        | 994.0448        | 1970.0557       | 985.5315       | 1969.0717      | 985.0395 |
| 3  | 332.1088         | 166.5581        |                  |                 | 314.0983       | 157.5528 | <b>D</b> | 1872.0653        | 936.5313        | 1855.0288       | 928.0180       | 1854.0447      | 927.5260 |
| 4  | 389.1303         | 195.0688        |                  |                 | 371.1197       | 186.0635 | <b>G</b> | 1757.0284        | <b>879.0178</b> | 1740.0018       | 870.5045       |                | 17       |
| 5  | 573.2515         | 287.1294        | 556.2249         | 278.6161        | 555.2409       | 278.1241 | <b>K</b> | 1700.0069        | 850.5071        | 1682.9803       | 841.9938       |                | 16       |
| 6  | 630.2729         | 315.6401        | 613.2464         | 307.1268        | 612.2624       | 306.6348 | <b>G</b> | <b>1515.8857</b> | 758.4465        | 1498.8592       | 749.9332       |                | 15       |
| 7  | 743.3570         | 372.1821        | 726.3305         | 363.6689        | 725.3464       | 363.1769 | <b>L</b> | 1458.8643        | 729.9358        | 1441.8377       | 721.4225       |                | 14       |
| 8  | 800.3785         | 400.6929        | 783.3519         | 392.1796        | 782.3679       | 391.6876 | <b>G</b> | <b>1395.7802</b> | 673.3937        | 1328.7536       | 664.8805       |                | 13       |
| 9  | 935.4411         | 468.2242        | 918.4146         | 459.7109        | 917.4306       | 459.2189 | <b>I</b> | 1288.7587        | 644.8830        | 1271.7322       | 636.3697       |                | 12       |
| 10 | 1063.4997        | 532.2535        | 1046.4732        | 523.7402        | 1045.4892      | 523.2482 | <b>Q</b> | <b>1153.6961</b> | 577.3517        | 1136.6696       | 568.8384       |                | 11       |
| 11 | 1176.5838        | 588.7965        | 1159.5572        | 580.2823        | 1158.5732      | 579.7902 | <b>L</b> | <b>1025.6378</b> | 513.3224        | 1008.6109       | 504.8091       |                | 10       |
| 12 | 1378.7428        | 689.8750        | 1361.7163        | 681.3618        | 1360.7322      | 680.8638 | <b>K</b> | <b>912.5534</b>  | 456.7803        | 895.5269        | 448.2671       |                | 9        |
| 13 | <b>1435.7643</b> | 718.3858        | 1418.7377        | <b>709.8725</b> | 1417.7537      | 709.3805 | <b>G</b> | <b>710.3944</b>  | 355.7008        | 693.3679        | 347.1876       |                | 8        |
| 14 | 1532.8170        | 766.9122        | <b>1515.7905</b> | 758.3989        | 1514.8065      | 757.9069 | <b>P</b> | <b>653.3729</b>  | 327.1901        | 636.3464        | 318.6768       |                | 7        |
| 15 | <b>1645.9011</b> | 823.4542        | 1628.8745        | 814.9409        | 1627.8905      | 814.4489 | <b>L</b> | 556.3202         | 278.6637        | 539.2936        | 270.1504       |                | 6        |
| 16 | <b>1702.9226</b> | 851.9649        | 1685.8960        | 843.4516        | 1684.9120      | 842.9596 | <b>G</b> | <b>443.2361</b>  | 222.1217        | 426.2096        | 213.6084       |                | 5        |
| 17 | <b>1799.9753</b> | 900.4913        | 1782.9488        | 891.9780        | 1781.9648      | 891.4860 | <b>P</b> | <b>386.2146</b>  | 193.6110        | 369.1881        | 185.0977       |                | 4        |
| 18 | 1856.9968        | 929.0201        | 1839.9702        | 920.4888        | 1838.9862      | 919.9967 | <b>C</b> | 289.1619         | 145.0846        | 272.1353        | 136.5713       |                | 3        |
| 19 | 1914.0182        | 957.5128        | 1896.9917        | 948.9995        | 1896.0077      | 948.5075 | <b>G</b> | 232.1404         | 116.5738        | 215.1139        | 108.0606       |                | 2        |
| 20 |                  |                 |                  |                 |                |          | <b>R</b> | 175.1190         | 88.0631         | 158.0924        | 79.5498        |                | 1        |

Found in **Q9BVP2**, Guanine nucleotide-binding protein-like 3 OS=Homo sapiens GN=GNL3 PE=1 SV=2

Match to Query 6244: 1414.857148 from(708.435850,2+) intensity(303580.1563)

Title: File386 Spectrum10835 scans: 12137

Data file \\192.168.1.104\public\raw data\Elite\_01\methylation\_ZW\SW620\2013-5-16-620-Kpropio-methyl-IP-Fr14-ZW.mgf

Click mouse within plot area to zoom in by factor of two about that point

Or,   to  Da Label all possible matches  Label matches used for scoring 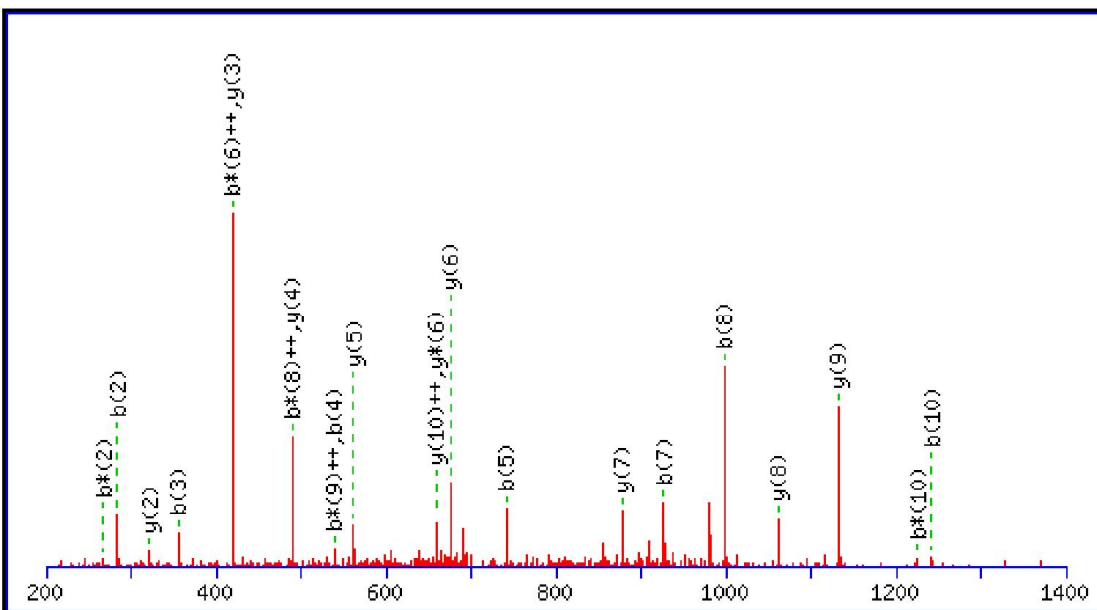

Monoisotopic mass of neutral peptide Mr(calc): 1414.8569

Fixed modifications: Carbamidomethyl (C) (apply to specified residues or

Variable modifications:

**K2** : Propionyl (K)**K4** : Propionyl (K)**K5** : Propionyl-(13CD3)Methyl (K)

Ions Score: 66 Expect: 5.3e-005

Matches : 22/78 fragment ions using 24 most intense peaks ([help](#))

| #  | b                | b <sup>++</sup> | b*               | b <sup>+++</sup> | Seq. | y                | y <sup>++</sup> | y*              | y <sup>+++</sup> | #  |
|----|------------------|-----------------|------------------|------------------|------|------------------|-----------------|-----------------|------------------|----|
| 1  | 100.0757         | 50.5415         |                  |                  | V    |                  |                 |                 |                  | 11 |
| 2  | <b>284.1969</b>  | 142.6021        | <b>267.1703</b>  | 134.0888         | K    | 1316.7958        | <b>658.9015</b> | 1299.7692       | 650.3882         | 10 |
| 3  | <b>355.2340</b>  | 178.1206        | 338.2074         | 169.6074         | A    | <b>1132.6746</b> | 566.8409        | 1115.6480       | 558.3277         | 9  |
| 4  | <b>539.3552</b>  | 270.1812        | 522.3286         | 261.6679         | K    | <b>1061.6375</b> | 531.3224        | 1044.6109       | 522.8091         | 8  |
| 5  | <b>741.5142</b>  | 371.2607        | 724.4876         | 362.7475         | K    | <b>877.5163</b>  | 439.2618        | 860.4897        | 430.7485         | 7  |
| 6  | 855.5571         | 428.2822        | 838.5306         | <b>419.7689</b>  | N    | <b>675.3573</b>  | 338.1823        | <b>658.3307</b> | 329.6690         | 6  |
| 7  | <b>926.5942</b>  | 463.8007        | 909.5677         | 455.2875         | A    | <b>561.3144</b>  | 281.1608        | 544.2878        | 272.6475         | 5  |
| 8  | <b>997.6313</b>  | 499.3193        | 980.6048         | <b>490.8060</b>  | A    | <b>490.2772</b>  | 245.6423        | 473.2507        | 237.1290         | 4  |
| 9  | 1094.6841        | 547.8457        | 1077.6575        | <b>539.3324</b>  | P    | <b>419.2401</b>  | 210.1237        | 402.2136        | 201.6104         | 3  |
| 10 | <b>1241.7525</b> | 621.3799        | <b>1224.7260</b> | 612.8666         | F    | <b>322.1874</b>  | 161.5973        | 305.1608        | 153.0840         | 2  |
| 11 |                  |                 |                  |                  | R    | 175.1190         | 88.0631         | 158.0924        | 79.5498          | 1  |

Found in **E9PBG7**, Calcium/calmodulin-dependent protein kinase type II subunit delta OS=Homo sapiens GN=CAMK2D PE=2 SV=1

Match to Query 10827: 1650.033788 from(826.024170,2+) intensity(613010.8125)

Title: File392 Spectrum18879 scans: 20903

Data file \\192.168.1.104\public\raw data\Elite\_01\methylation\_ZW\SW620\2013-5-16-620-Kpropio-methyl-IP-Fr6-ZW.mgf

Click mouse within plot area to zoom in by factor of two about that point

Or,   to  Da Label all possible matches  Label matches used for scoring 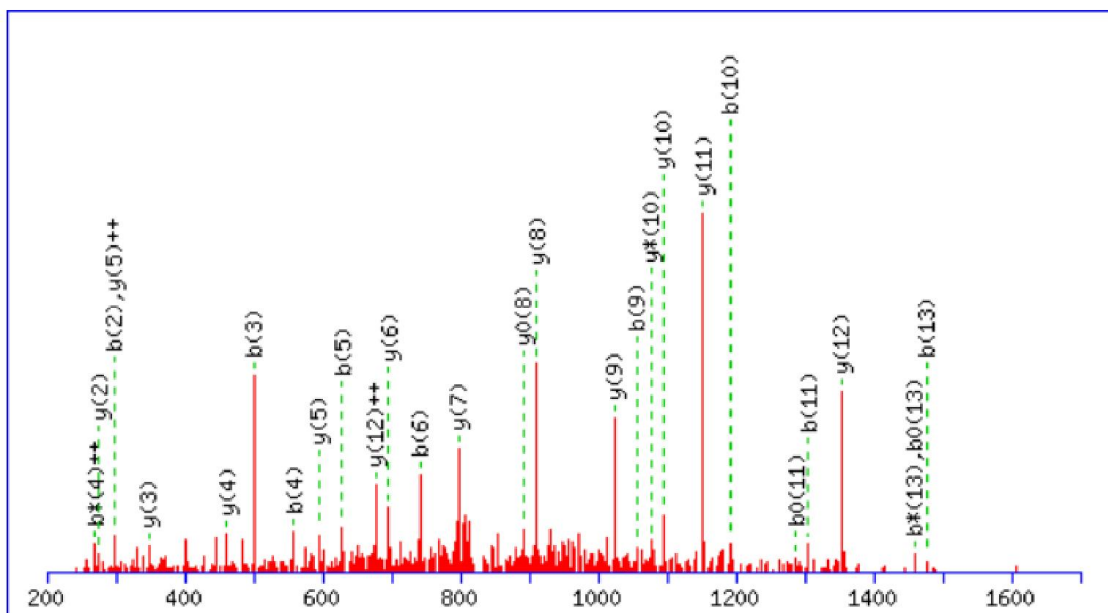

Monoisotopic mass of neutral peptide Mr(calc): 1650.0295

Fixed modifications: Carbamidomethyl (C) (apply to specified resi

Variable modifications:

K1 : Propionyl (K)

K3 : Propionyl-(13CD3)Methyl (K)

M10 : Label:13C(1)2H(3) (M)

Ions Score: 66 Expect: 2.1e-005

Matches : 28/140 fragment ions using 53 most intense peaks

[\(hel](#)

| #  | b                | b <sup>+</sup> | b <sup>+</sup>   | b <sup>++</sup> | b <sup>0</sup>   | b <sup>0++</sup> | Seq. | y                | y <sup>++</sup> | y <sup>+</sup>   | y <sup>+++</sup> | y <sup>0</sup>  | y <sup>0++</sup> | #  |
|----|------------------|----------------|------------------|-----------------|------------------|------------------|------|------------------|-----------------|------------------|------------------|-----------------|------------------|----|
| 1  | 185.1285         | 93.0679        | 168.1019         | 84.5546         |                  |                  | K    |                  |                 |                  |                  |                 |                  | 14 |
| 2  | <b>298.2125</b>  | 149.6099       | 281.1860         | 141.0966        |                  |                  | L    | 1466.9156        | 733.9614        | 1449.8891        | 725.4482         | 1448.9051       | 724.9562         | 13 |
| 3  | <b>500.3715</b>  | 250.6894       | 483.3450         | 242.1761        |                  |                  | K    | <b>1353.8316</b> | <b>677.4194</b> | 1336.8050        | 668.9061         | 1335.8210       | 668.4141         | 12 |
| 4  | <b>557.3930</b>  | 279.2001       | 540.3664         | <b>270.6869</b> |                  |                  | G    | <b>1151.6725</b> | 576.3399        | 1134.6460        | 567.8266         | 1133.6620       | 567.3346         | 11 |
| 5  | <b>628.4301</b>  | 314.7187       | 611.4036         | 306.2054        |                  |                  | A    | <b>1094.6511</b> | 547.8292        | <b>1077.6245</b> | 539.3159         | 1076.6405       | 538.8239         | 10 |
| 6  | <b>741.5142</b>  | 371.2607       | 724.4876         | 362.7475        |                  |                  | I    | <b>1023.6140</b> | 512.3106        | 1006.5874        | 503.7973         | 1005.6034       | 503.3053         | 9  |
| 7  | 854.5982         | 427.8028       | 837.5717         | 419.2895        |                  |                  | L    | <b>910.5299</b>  | 455.7686        | 893.5034         | 447.2553         | <b>892.5193</b> | 446.7633         | 8  |
| 8  | 955.6459         | 478.3266       | 938.6194         | 469.8133        | 937.6354         | 469.3213         | T    | <b>797.4458</b>  | 399.2266        | 780.4193         | 390.7133         | 779.4353        | 390.2213         | 7  |
| 9  | <b>1056.6936</b> | 528.8504       | 1039.6670        | 520.3372        | 1038.6830        | 519.8452         | T    | <b>696.3982</b>  | 348.7027        | 679.3716         | 340.1894         | 678.3876        | 339.6974         | 6  |
| 10 | <b>1191.7563</b> | 596.3818       | 1174.7297        | 587.8685        | 1173.7457        | 587.3765         | M    | <b>595.3505</b>  | <b>298.1789</b> | 578.3239         | 289.6656         | 577.3399        | 289.1736         | 5  |
| 11 | <b>1304.8403</b> | 652.9238       | 1287.8138        | 644.4105        | <b>1286.8298</b> | 643.9185         | L    | <b>460.2878</b>  | 230.6475        | 443.2613         | 222.1343         | 442.2772        | 221.6423         | 4  |
| 12 | 1375.8774        | 688.4424       | 1358.8509        | 679.9291        | 1357.8669        | 679.4371         | A    | <b>347.2037</b>  | 174.1055        | 330.1772         | 165.5922         | 329.1932        | 165.1002         | 3  |
| 13 | <b>1476.9251</b> | 738.9662       | <b>1459.8986</b> | 730.4529        | <b>1458.9146</b> | 729.9609         | T    | <b>276.1666</b>  | 138.5870        | 259.1401         | 130.0757         | 258.1561        | 129.5817         | 2  |
| 14 |                  |                |                  |                 |                  |                  | R    | 175.1190         | 88.0631         | 158.0924         | 79.5498          |                 |                  | 1  |

MS/MS Fragmentation of **AASVSPNLKKTNAQAAPKPR**  
 Found in **B4DH53**, MAP1S light chain OS=Homo sapiens GN=MAP1S PE=2 SV=1

Match to Query 16359: 2234.266448 from(1118.140500,2+) intensity(111044.6719)  
 Title: File386 Spectrum10990 scans: 12302  
 Data file \\192.168.1.104\public\raw data\Elite\_01\methylation\_ZW\SW620\2013-5-16-620-Kpropio-methyl-IP-Fr14-ZW.mgf

Click mouse within plot area to zoom in by factor of two about that point  
 Or,   to  Da   
 Label all possible matches  Label matches used for scoring

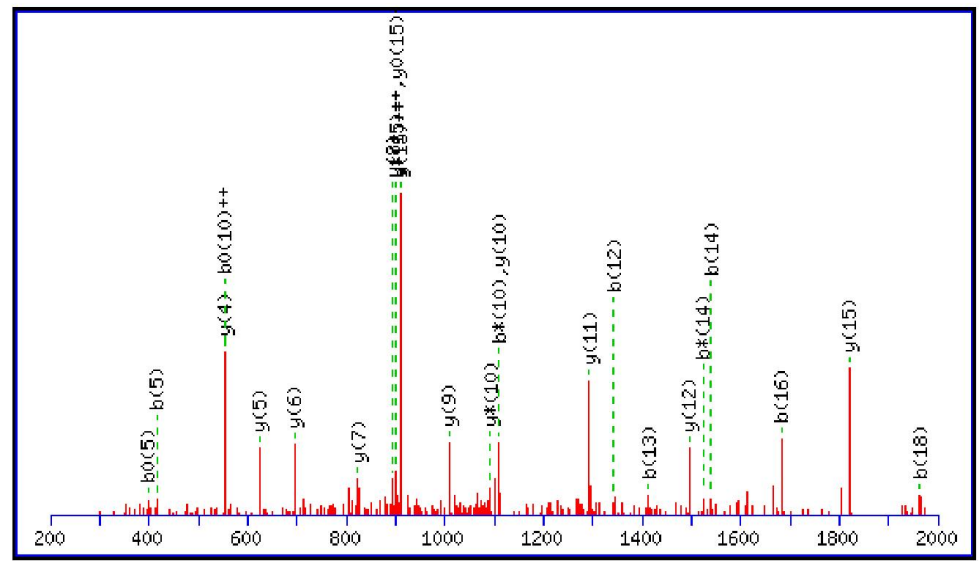

**Monoisotopic mass of neutral peptide Mr(calc):** 2234.2655  
**Fixed modifications:** Carbamidomethyl (C) (apply to specified residues or termini only)  
**Variable modifications:**  
**K9** : Propionyl-(13CD3)Methyl (K)  
**K10** : Propionyl (K)  
**K18** : Propionyl (K)  
**Ions Score:** 63 **Expect:** 0.00019  
**Matches :** 24/194 fragment ions using 34 most intense peaks ([help](#))

| #  | b                | y <sup>++</sup> | b*        | b <sup>++</sup> | b <sup>0</sup>  | y <sup>0++</sup> | Seq. | y                | y <sup>++</sup> | y*        | y <sup>++</sup> | y <sup>0</sup> | y <sup>0++</sup> | #  |
|----|------------------|-----------------|-----------|-----------------|-----------------|------------------|------|------------------|-----------------|-----------|-----------------|----------------|------------------|----|
| 1  | 72.0444          | 36.5258         |           |                 |                 |                  | A    |                  |                 |           |                 |                |                  | 20 |
| 2  | 143.0815         | 72.0444         |           |                 |                 |                  | A    | 2164.2357        | 1082.6215       | 2147.2092 | 1074.1082       | 2146.2251      | 1073.6162        | 19 |
| 3  | 230.1135         | 115.5604        |           |                 | 212.1030        | 106.5551         | S    | 2093.1986        | 1047.1029       | 2076.1721 | 1038.5897       | 2075.1880      | 1038.0977        | 18 |
| 4  | 317.1456         | 159.0764        |           |                 | 299.1350        | 150.0711         | S    | 2006.1666        | 1003.5869       | 1989.1400 | 995.0736        | 1988.1560      | 994.5816         | 17 |
| 5  | <b>416.2140</b>  | 208.6106        |           |                 | <b>398.2034</b> | 199.6053         | V    | 1919.1345        | 960.0709        | 1902.1080 | 951.5576        | 1901.1240      | 951.0656         | 16 |
| 6  | 513.2667         | 257.1370        |           |                 | 495.2562        | 248.1317         | P    | <b>1820.0661</b> | 910.5367        | 1803.0396 | 902.0234        | 1802.0556      | 901.5314         | 15 |
| 7  | 627.3097         | 314.1585        | 610.2831  | 305.6452        | 609.2991        | 305.1532         | N    | 1723.0134        | 862.0103        | 1705.9688 | 853.4970        | 1705.0028      | 853.0050         | 14 |
| 8  | 740.3937         | 370.7005        | 723.3672  | 362.1872        | 722.3832        | 361.6952         | L    | 1608.9704        | 804.3889        | 1591.9439 | 796.4756        | 1590.9598      | 795.9836         | 13 |
| 9  | 942.5527         | 471.7800        | 925.5262  | 463.2667        | 924.5422        | 462.7747         | K    | <b>1495.8864</b> | 748.4468        | 1478.8598 | 739.9336        | 1477.8758      | 739.4415         | 12 |
| 10 | 1126.6739        | 563.8406        | 1109.6474 | 555.3273        | 1108.6634       | 554.8353         | K    | <b>1293.7374</b> | 647.3673        | 1276.7008 | 638.8546        | 1275.7168      | 638.3620         | 11 |
| 11 | 1227.7216        | 614.3644        | 1210.6951 | 605.8512        | 1209.7110       | 605.3592         | T    | <b>1109.6062</b> | 555.3067        | 1092.5796 | 546.7935        | 1091.5956      | 546.3014         | 10 |
| 12 | <b>1341.7645</b> | 671.3859        | 1324.7380 | 662.8726        | 1323.7540       | 662.3808         | N    | <b>1008.5585</b> | 504.7829        | 991.5320  | 496.2696        |                |                  | 9  |
| 13 | <b>1412.8016</b> | 706.9045        | 1395.7751 | 698.3912        | 1394.7911       | 697.8992         | A    | <b>894.5156</b>  | 447.7614        | 877.4890  | 439.2482        |                |                  | 8  |
| 14 | <b>1540.8602</b> | 770.9337        | 1523.8337 | 762.4205        | 1522.8497       | 761.9285         | Q    | <b>823.4785</b>  | 412.2429        | 806.4519  | 403.7296        |                |                  | 7  |
| 15 | 1611.8973        | 806.4523        | 1594.8708 | 797.9390        | 1593.8868       | 797.4470         | A    | <b>695.4199</b>  | 348.2136        | 678.3933  | 339.7003        |                |                  | 6  |
| 16 | <b>1682.9344</b> | 841.9709        | 1665.9079 | 833.4576        | 1664.9239       | 832.9656         | A    | <b>624.3828</b>  | 312.6950        | 607.3562  | 304.1817        |                |                  | 5  |
| 17 | 1779.9872        | 890.4972        | 1762.9607 | 881.9840        | 1761.9766       | 881.4920         | P    | <b>553.9457</b>  | 277.1765        | 536.3191  | 268.6632        |                |                  | 4  |
| 18 | <b>1964.1084</b> | 982.5578        | 1947.0818 | 974.0446        | 1946.0978       | 973.5525         | K    | 456.2929         | 228.6501        | 439.2663  | 220.1368        |                |                  | 3  |
| 19 | 2061.1612        | 1031.0842       | 2044.1346 | 1022.5709       | 2043.1506       | 1022.0789        | P    | 272.1717         | 136.5895        | 255.1452  | 128.0762        |                |                  | 2  |
| 20 |                  |                 |           |                 |                 |                  | R    | 175.1190         | 88.0631         | 158.0924  | 79.5498         |                |                  | 1  |

Found in **Q8NHM5**, Lysine-specific demethylase 2B OS=Homo sapiens GN=KDM2B PE=1 SV=1

Match to Query 15626: 2140.088968 from(1071.051760,2+) intensity(60884.8594)

Title: File386 Spectrum11418 scans: 12758

Data file \\192.168.1.104\public\raw data\Elite\_01\methylation\_ZW\SW620\2013-5-16-620-Kpropio-methyl-IP-Fr14-ZW.mgf

Click mouse within plot area to zoom in by factor of two about that point

Or,   to  Da Label all possible matches  Label matches used for scoring 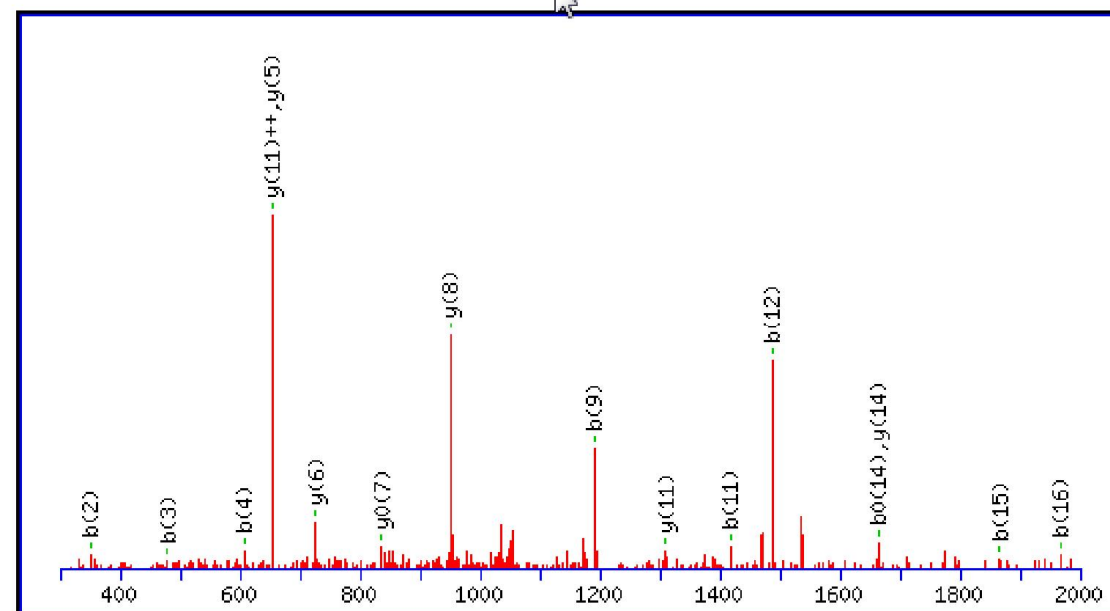**Monoisotopic mass of neutral peptide Mr(calc):** 2140.0961**Fixed modifications:** Carbamidomethyl (C) (apply to specified residues only)**Variable modifications:****K2** : Propionyl-(13CD3)Methyl (K)**K15** : Propionyl (K)**Ions Score:** 61 **Expect:** 0.00051**Matches** : 16/182 fragment ions using 17 most intense peaks [\(help\)](#)

| #  | b                | b <sup>++</sup> | b <sup>+</sup> | b <sup>+++</sup> | b <sup>0</sup>   | b <sup>0++</sup> | Seq. | y                | y <sup>++</sup> | y <sup>+</sup> | y <sup>+++</sup> | y <sup>0</sup>  | y <sup>0++</sup> | #  |
|----|------------------|-----------------|----------------|------------------|------------------|------------------|------|------------------|-----------------|----------------|------------------|-----------------|------------------|----|
| 1  | 148.0757         | 74.5415         |                |                  |                  |                  | F    |                  |                 |                |                  |                 |                  | 17 |
| 2  | <b>350.2347</b>  | 175.6210        | 333.2082       | 167.1077         |                  |                  | K    | 1994.0349        | 997.5211        | 1977.0084      | 989.0078         | 1976.0244       | 988.5158         | 16 |
| 3  | <b>478.2933</b>  | 239.6503        | 461.2667       | 231.1370         |                  |                  | Q    | 1791.3759        | 896.4416        | 1774.8494      | 887.9283         | 1773.8654       | 887.4363         | 15 |
| 4  | <b>607.3359</b>  | 304.1716        | 590.3093       | 295.6583         | 589.3258         | 295.1663         | E    | <b>1663.8174</b> | 832.4123        | 1646.7908      | 823.8990         | 1645.8068       | 823.4070         | 14 |
| 5  | 704.3886         | 352.6980        | 687.3621       | 344.1847         | 686.3781         | 343.6927         | P    | 1534.7748        | 767.3910        | 1517.7482      | 759.3777         | 1516.7642       | 758.8857         | 13 |
| 6  | 833.4312         | 417.2193        | 816.4047       | 408.7060         | 815.4207         | 408.2140         | E    | 1437.7220        | 719.3646        | 1420.6955      | 710.8514         | 1419.7114       | 710.3594         | 12 |
| 7  | 948.4582         | 474.7327        | 931.4316       | 466.2195         | 930.4476         | 465.7274         | D    | <b>1308.6794</b> | <b>654.8433</b> | 1291.6529      | 646.3301         | 1290.6688       | 645.8381         | 11 |
| 8  | 1077.5008        | 539.2540        | 1060.4742      | 530.7407         | 1059.4902        | 530.2487         | E    | 1193.6525        | 597.3299        | 1176.6259      | 588.3166         | 1175.6419       | 588.3246         | 10 |
| 9  | <b>1190.5848</b> | 595.7961        | 1173.5583      | 587.2828         | 1172.5743        | 586.7908         | L    | 1064.6099        | 532.8086        | 1047.5833      | 524.2963         | 1046.5993       | 523.8033         | 9  |
| 10 | 1287.6376        | 644.3224        | 1270.6110      | 635.8092         | 1269.6270        | 635.3172         | P    | <b>951.5258</b>  | 476.2665        | 934.4939       | 467.7533         | 933.5152        | 467.2613         | 8  |
| 11 | <b>1416.6502</b> | 708.8437        | 1399.6536      | 700.3305         | 1398.6696        | 699.8384         | E    | 890.4730         | 427.7402        | 837.4465       | 419.2269         | <b>836.4625</b> | 418.7349         | 7  |
| 12 | <b>1487.7173</b> | 744.3623        | 1470.6908      | 735.8490         | 1469.7067        | 735.3570         | A    | <b>725.4305</b>  | 363.2189        | 708.4039       | 354.7056         | 707.4199        | 354.2136         | 6  |
| 13 | 1584.7701        | 792.8887        | 1567.7435      | 784.3754         | 1566.7595        | 783.8834         | P    | <b>654.3933</b>  | 327.7003        | 637.3668       | 319.1870         | 636.3828        | 318.6950         | 5  |
| 14 | 1681.8228        | 841.4151        | 1664.7963      | 832.9018         | <b>1663.8123</b> | 832.4098         | P    | 557.3406         | 279.1739        | 540.3140       | 270.8607         | 539.3300        | 270.1686         | 4  |
| 15 | <b>1865.9440</b> | 933.4756        | 1848.9175      | 924.9624         | 1847.9354        | 924.4704         | K    | 460.2878         | 230.6475        | 443.2613       | 222.1343         | 442.2772        | 221.6423         | 3  |
| 16 | <b>1966.9917</b> | 983.9995        | 1949.9651      | 975.4862         | 1948.9811        | 974.9942         | T    | 276.1666         | 138.5870        | 259.1401       | 130.0737         | 258.1561        | 129.5817         | 2  |
| 17 |                  |                 |                |                  |                  |                  | R    | 175.1190         | 88.0631         | 158.0924       | 79.5499          |                 |                  | 1  |

MS/MS Fragmentation of **VTDLKAALRQ**

Found in **E7EQT4**, Apoptotic chromatin condensation inducer in the nucleus OS=Homo sapiens GN=ACIN1 PE=2 SV=2

Match to Query 5270: 1316.756568 from(659.385560, 2+) intensity(124479.6797)

Title: File388 Spectrum13891 scans: 15609

Data file \\192.168.1.104\public\raw data\Elite\_01\methylation\_ZW\SW620\2013-5-16-620-Kpropio-methyl-IP-Fr16-ZW.mgf

Click mouse within plot area to zoom in by factor of two about that point

Or,   to  Da

Label all possible matches  Label matches used for scoring

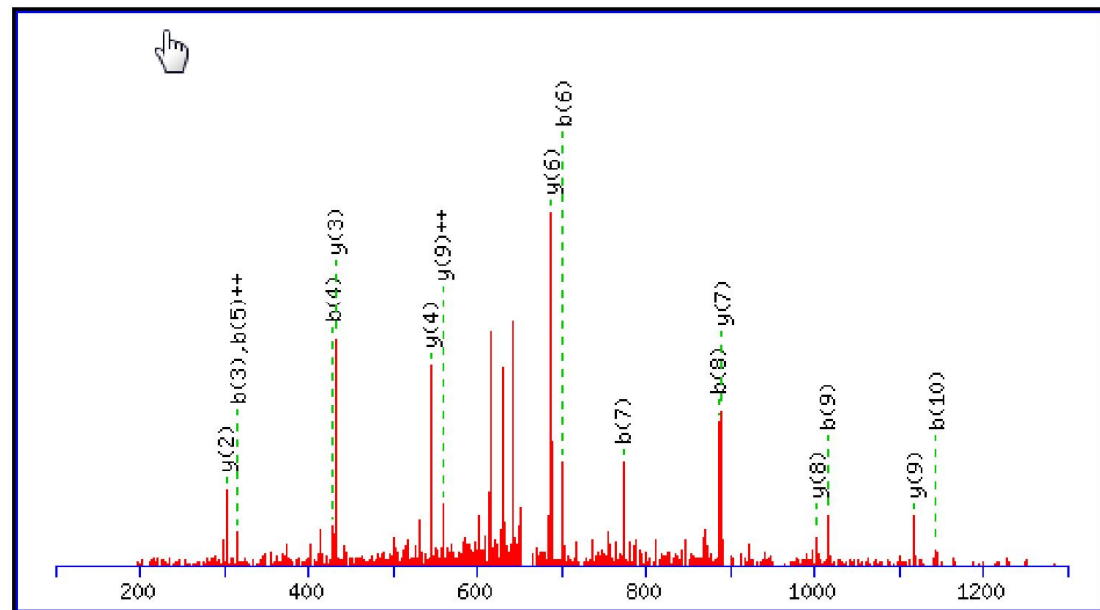

**Monoisotopic mass of neutral peptide Mr(calc): 1316.7572**

**Fixed modifications:** Carbamidomethyl (C) (apply to specified residues or termini only)

**Variable modifications:**

**K5** : Propionyl-(13CD3)Methyl (K)

**Ions Score: 61 Expect: 0.00035**

**Matches : 16/106 fragment ions using 22 most intense peaks** ([help](#))

| #  | b                | b <sup>++</sup> | b <sup>+</sup> | b <sup>++</sup> | b <sup>0</sup> | b <sup>++</sup> | Seq. | y                | y <sup>++</sup> | y <sup>+</sup> | y <sup>++</sup> | y <sup>0</sup> | y <sup>++</sup> | #  |
|----|------------------|-----------------|----------------|-----------------|----------------|-----------------|------|------------------|-----------------|----------------|-----------------|----------------|-----------------|----|
| 1  | 100.0787         | 50.5418         |                |                 |                |                 | Y    |                  |                 |                |                 |                |                 | 11 |
| 2  | 201.1234         | 101.0653        |                |                 | 183.1128       | 92.0600         | T    | 1218.6961        | 609.3517        | 1201.6696      | 601.3384        | 1200.6855      | 600.8464        | 10 |
| 3  | <b>316.1505</b>  | 158.5788        |                |                 | 298.1397       | 149.5735        | D    | <b>1117.6484</b> | <b>559.3279</b> | 1100.6219      | 550.8146        | 1099.6379      | 550.3226        | 9  |
| 4  | <b>429.2344</b>  | 215.1208        |                |                 | 411.2238       | 206.1155        | L    | <b>1002.6215</b> | 501.8144        | 985.5949       | 493.3011        | 984.6109       | 492.8091        | 8  |
| 5  | 631.3934         | <b>316.2003</b> | 614.3668       | 307.6871        | 613.3828       | 307.1951        | K    | <b>889.5374</b>  | 445.2724        | 872.5109       | 436.7591        | 871.5269       | 436.2671        | 7  |
| 6  | <b>702.4305</b>  | 351.7189        | 685.4040       | 343.2056        | 684.4199       | 342.7136        | A    | <b>687.3784</b>  | 344.1928        | 670.3519       | 335.6796        | 669.3678       | 335.1876        | 6  |
| 7  | <b>773.4676</b>  | 387.2374        | 756.4411       | 378.7242        | 755.4571       | 378.2322        | A    | 616.3413         | 308.6743        | 599.3148       | 300.1610        | 598.3307       | 299.6690        | 5  |
| 8  | <b>886.5517</b>  | 443.7796        | 869.5251       | 435.2682        | 868.5411       | 434.7742        | L    | <b>545.3042</b>  | 273.1557        | 528.2776       | 264.6425        | 527.2936       | 264.1504        | 4  |
| 9  | <b>1015.5943</b> | 508.3008        | 998.5677       | 499.7875        | 997.5837       | 499.2955        | E    | <b>432.2201</b>  | 216.6137        | 415.1936       | 208.1004        | 414.2096       | 207.6084        | 3  |
| 10 | <b>1143.6529</b> | 572.3301        | 1126.6263      | 563.8168        | 1125.6423      | 563.3248        | Q    | <b>303.1775</b>  | 152.0924        | 286.1510       | 143.5791        |                |                 | 2  |
| 11 |                  |                 |                |                 |                |                 | R    | 175.1190         | 88.0631         | 158.0924       | 79.5498         |                |                 | 1  |



Found in **Q5VTE0**, Putative elongation factor 1-alpha-like 3 OS=Homo sapiens GN=EEF1A1P5 PE=5 SV=1

Match to query 13321: 2036.063948 from(1019.039250,2+) intensity(15974.4160)

Title: File422 Spectrum9491 scans: 10993

Data file \\192.168.1.104\public\raw data\Elite\_01\methylation\_ZW\SW620\2013-6-5-SW620-Kpropio-methyl-IP-Fr13-ZW.mgf

Click mouse within plot area to zoom in by factor of two about that point

Or,   to  Da Label all possible matches  Label matches used for scoring 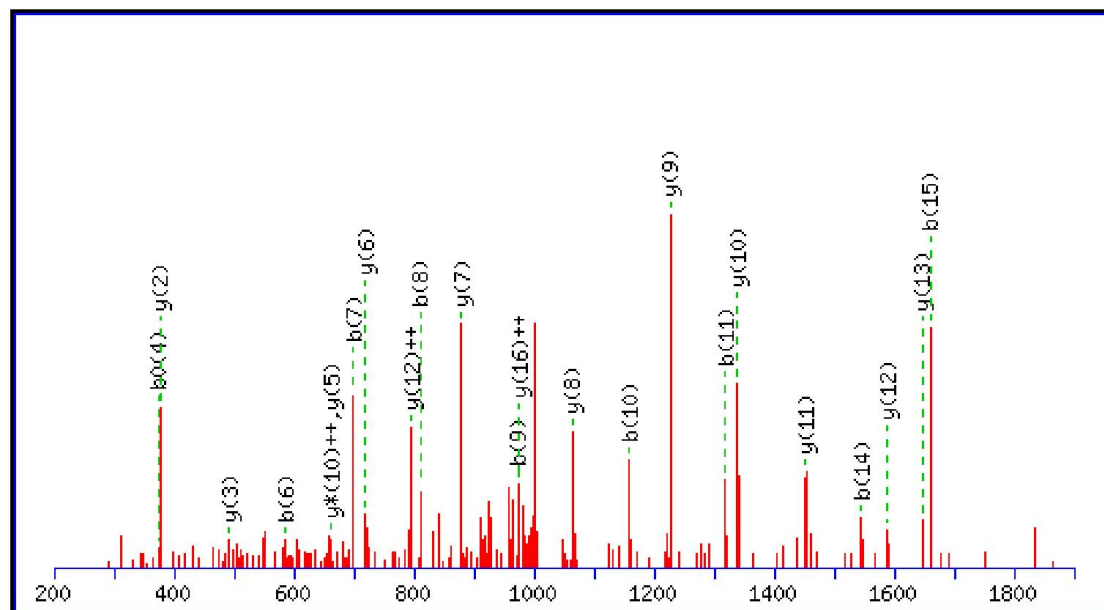Monoisotopic mass of neutral peptide **Mr(calc)**: 2036.0634

Fixed modifications: Carbamidomethyl (C) (apply to specified residues or

Variable modifications:

**K10** : Propionyl (K)**K16** : Propionyl-(13CD3)Methyl (K)

Ions Score: 60 Expect: 0.00074

Matches : 23/170 fragment ions using 45 most intense peaks ([help](#))

| #  | b                | b <sup>++</sup> | b*        | b <sup>+++</sup> | b <sup>0</sup>  | b <sup>0++</sup> | Seq. | y                | y <sup>++</sup> | y*        | y <sup>+++</sup> | y <sup>0</sup> | y <sup>0++</sup> | #  |
|----|------------------|-----------------|-----------|------------------|-----------------|------------------|------|------------------|-----------------|-----------|------------------|----------------|------------------|----|
| 1  | 88.0393          | 44.5233         |           |                  | 70.0287         | 35.5180          | S    |                  |                 |           |                  |                |                  | 1  |
| 2  | 139.0370         | 95.0471         |           |                  | 171.0764        | 86.0418          | T    | 1960.0386        | <b>975.5229</b> | 1933.0120 | 967.0097         | 1932.0230      | 966.5177         | 16 |
| 3  | 290.1347         | 145.5710        |           |                  | 272.1241        | 136.5657         | T    | 1848.9909        | 924.9991        | 1831.9644 | 916.4853         | 1830.9804      | 915.9938         | 15 |
| 4  | 391.1823         | 196.0948        |           |                  | <b>373.1718</b> | 187.0895         | T    | 1747.9432        | 874.4753        | 1730.9167 | 865.9620         | 1729.9327      | 865.4700         | 14 |
| 5  | 448.2038         | 224.6055        |           |                  | 430.1932        | 215.6003         | G    | <b>1646.0956</b> | 823.9514        | 1629.8690 | 815.4381         | 1628.8850      | 814.9461         | 13 |
| 6  | <b>585.2627</b>  | 293.1350        |           |                  | 567.2522        | 284.1297         | H    | <b>1589.8741</b> | <b>795.4407</b> | 1572.8475 | 786.9274         | 1571.8635      | 786.4354         | 12 |
| 7  | <b>698.3468</b>  | 349.6770        |           |                  | 680.3362        | 340.6717         | L    | <b>1452.0152</b> | 726.9112        | 1435.7886 | 718.3980         | 1434.8046      | 717.9069         | 11 |
| 8  | <b>811.4308</b>  | 406.2191        |           |                  | 793.4203        | 397.2138         | I    | <b>1339.7311</b> | 670.3692        | 1322.7046 | <b>661.8559</b>  | 1321.7206      | 661.3639         | 10 |
| 9  | <b>974.4942</b>  | 487.7507        |           |                  | 956.4836        | 478.7454         | Y    | <b>1226.6471</b> | 613.8272        | 1209.6205 | 605.3139         | 1208.6365      | 604.8219         | 9  |
| 10 | <b>1158.6154</b> | 579.8113        | 1141.5888 | 571.2980         | 1140.6048       | 570.8060         | K    | <b>1063.5837</b> | 532.2955        | 1046.5572 | 523.7822         | 1045.5732      | 523.2902         | 8  |
| 11 | <b>1318.6460</b> | 659.8266        | 1301.6195 | 651.3134         | 1300.6354       | 650.8214         | C    | <b>879.4635</b>  | 440.2349        | 862.4360  | 431.7218         | 861.4520       | 431.2298         | 7  |
| 12 | 1375.6675        | 688.3374        | 1358.6409 | 679.8241         | 1357.6569       | 679.3321         | G    | <b>719.4319</b>  | 360.2196        | 702.4054  | 351.7063         | 701.4213       | 351.2143         | 6  |
| 13 | 1432.6889        | 716.8481        | 1415.6624 | 708.3348         | 1414.6784       | 707.8428         | G    | <b>662.4104</b>  | 331.7089        | 645.3839  | 323.1956         | 644.3999       | 322.7036         | 5  |
| 14 | <b>1545.7730</b> | 773.3901        | 1528.7464 | 764.8769         | 1527.7624       | 764.3849         | I    | 605.3890         | 303.1981        | 588.3624  | 294.6848         | 587.3784       | 294.1928         | 4  |
| 15 | <b>1660.7999</b> | 830.9036        | 1643.7734 | 822.3903         | 1642.7894       | 821.8983         | D    | <b>492.3049</b>  | 246.6561        | 475.2784  | 238.1428         | 474.2943       | 237.6508         | 3  |
| 16 | 1862.9589        | 931.8631        | 1845.9324 | 923.4698         | 1844.9484       | 922.9778         | K    | <b>377.3780</b>  | 189.1426        | 360.2514  | 180.6293         |                |                  | 2  |
| 17 |                  |                 |           |                  |                 |                  | R    | 175.1190         | 88.0631         | 158.0924  | 79.5498          |                |                  |    |

Found in **F8VR77**, Proliferation-associated protein 2G4 OS=Homo sapiens GN=PA2G4 PE=2 SV=1

Match to Query 11015: 1827.995088 from(915.004820, 2+) intensity(15173.9170)

Title: File422 Spectrum11833 scans: 13491

Data file \\192.168.1.104\public\raw data\Elite\_01\methylation\_ZW\SW620\2013-6-5-SW620-Kpropio-methyl-IP-Fr13-ZW.mgf

Click mouse within plot area to zoom in by factor of two about that point

Or,   to  Da Label all possible matches  Label matches used for scoring 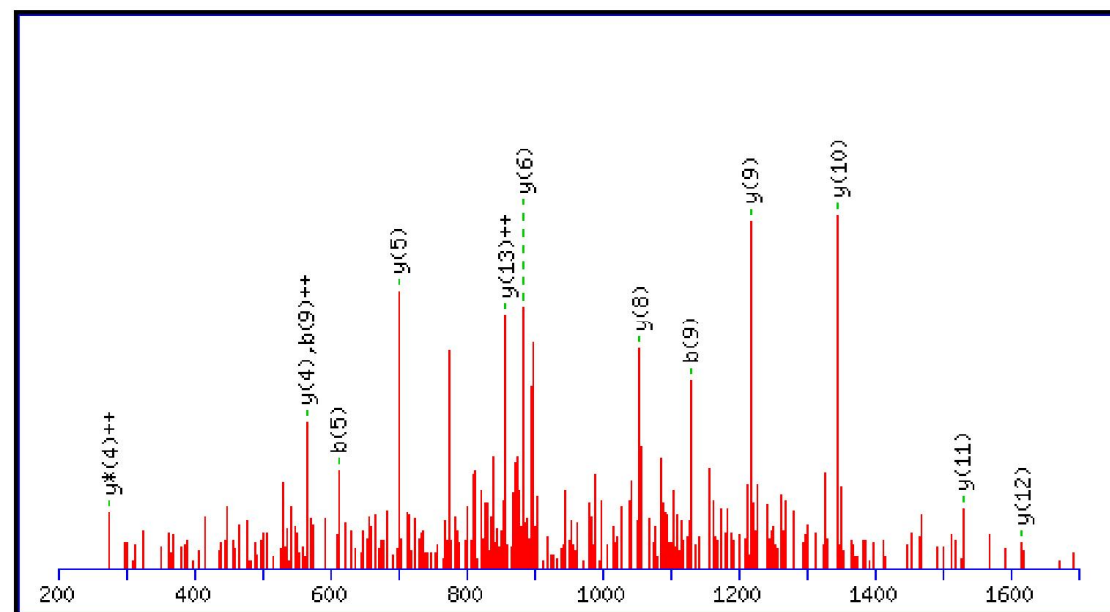Monoisotopic mass of neutral peptide **Mr(calc): 1827.9946**

Fixed modifications: Carbamidomethyl (C) (apply to specified residues only)

Variable modifications:

**K4** : Propionyl (K)**K9** : Propionyl (K)**M10** : Label:13C(1)2H(3) (M)**K11** : Propionyl-(13CD3)Methyl (K)

Ions Score: 58 Expect: 0.00091

Matches : 13/148 fragment ions using 15 most intense peaks ([help](#))

| #  | b         | b <sup>++</sup> | b <sup>+</sup> | b <sup>+++</sup> | b <sup>0</sup> | b <sup>0++</sup> | Seq. | y         | y <sup>++</sup> | y <sup>+</sup> | y <sup>+++</sup> | y <sup>0</sup> | y <sup>0++</sup> | #  |
|----|-----------|-----------------|----------------|------------------|----------------|------------------|------|-----------|-----------------|----------------|------------------|----------------|------------------|----|
| 1  | 116.0342  | 58.5207         |                |                  | 98.0237        | 49.5155          | D    |           |                 |                |                  |                |                  | 14 |
| 2  | 213.0870  | 107.0471        |                |                  | 195.0764       | 98.0418          | P    | 1713.9749 | 857.4911        | 1696.9484      | 848.9778         | 1695.9644      | 848.4858         | 13 |
| 3  | 300.1190  | 150.5631        |                |                  | 282.1084       | 141.5579         | S    | 1616.9222 | 808.9647        | 1599.8956      | 800.4514         | 1598.9116      | 799.9594         | 12 |
| 4  | 484.2402  | 242.6237        | 467.2136       | 234.1105         | 466.2296       | 233.6184         | K    | 1529.8901 | 765.4487        | 1512.8636      | 756.9354         | 1511.8796      | 756.4434         | 11 |
| 5  | 612.2988  | 306.6530        | 595.2722       | 298.1397         | 594.2882       | 297.6477         | Q    | 1345.7690 | 673.3881        | 1328.7424      | 664.8748         | 1327.7584      | 664.3928         | 10 |
| 6  | 775.3621  | 388.1847        | 758.3385       | 379.6714         | 757.3515       | 379.1794         | Y    | 1217.7104 | 609.3888        | 1200.6838      | 600.8456         | 1199.6998      | 600.3536         | 9  |
| 7  | 832.3836  | 416.6954        | 815.3570       | 408.1821         | 814.3730       | 407.8901         | G    | 1054.6470 | 527.8272        | 1037.6205      | 519.3189         | 1036.6365      | 518.8219         | 8  |
| 8  | 945.4676  | 473.2375        | 928.4411       | 464.7242         | 927.4571       | 464.2322         | L    | 997.6256  | 499.3164        | 980.5990       | 490.8032         | 979.6150       | 490.3111         | 7  |
| 9  | 1129.5888 | 565.2980        | 1112.5623      | 556.7848         | 1111.5782      | 556.2928         | K    | 884.5415  | 442.7744        | 867.5150       | 434.2611         | 866.5310       | 433.7691         | 6  |
| 10 | 1284.6515 | 632.8294        | 1247.6249      | 624.3161         | 1246.6409      | 623.3241         | I    | 700.4203  | 350.7188        | 683.3938       | 342.2005         | 682.4098       | 341.7085         | 5  |
| 11 | 1466.8105 | 733.9089        | 1449.7839      | 725.3956         | 1448.7999      | 724.9036         | K    | 565.3577  | 283.1825        | 548.3311       | 274.6692         | 547.3471       | 274.1772         | 4  |
| 12 | 1567.8582 | 794.4327        | 1550.8316      | 775.9194         | 1549.8476      | 775.4274         | T    | 363.1987  | 182.1030        | 346.1721       | 173.5897         | 345.1881       | 173.0977         | 3  |
| 13 | 1654.8902 | 827.9487        | 1637.8636      | 819.4355         | 1636.8796      | 818.9435         | S    | 262.1510  | 131.5791        | 245.1244       | 123.0659         | 244.1404       | 122.5738         | 2  |
| 14 |           |                 |                |                  |                |                  | R    | 175.1190  | 88.0631         | 158.0924       | 79.5498          |                |                  | 1  |

MS/MS Fragmentation of **GWLKSNVSDAVAQSTR**

Found in **P60174-1**, Isoform 2 of Triosephosphate isomerase OS=Homo sapiens GN=TPI1

Match to Query 11677: 1791.937108 from(896.975830,2+) intensity(24611.7207)

Title: File388 Spectrum11845 scans: 13426

Data file \\192.168.1.104\public\raw data\Elite\_01\methylation\_ZW\SW620\2013-5-16-620-Kpropio-methyl-IP-Fr16-ZW.mgf

Click mouse within plot area to zoom in by factor of two about that point

Or,   to  Da

Label all possible matches  Label matches used for scoring

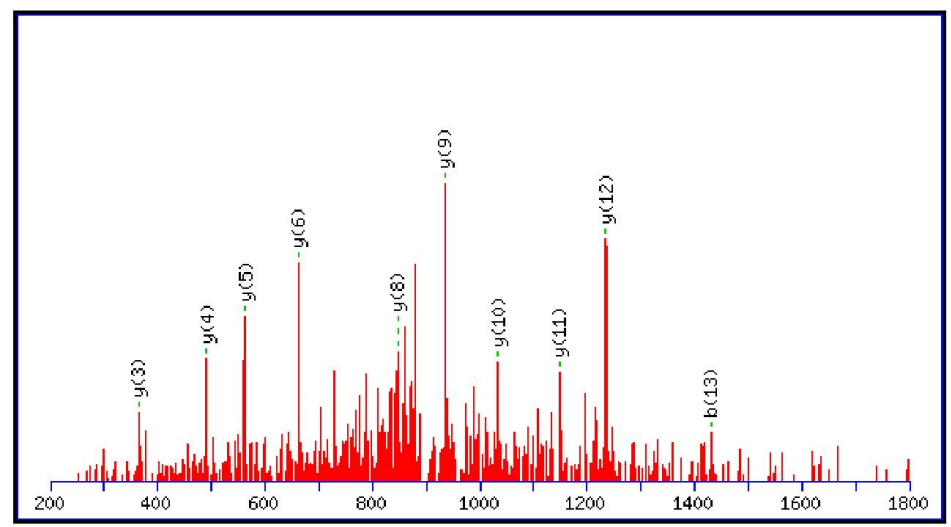

**Monoisotopic mass of neutral peptide Mr(calc):** 1791.9388

**Fixed modifications:** Carbamidomethyl (C) (apply to specified residues or termini only)

**Variable modifications:**

**K4** : Propionyl-(13CD3)Methyl (K)

**Ions Score:** 58 **Expect:** 0.00092

**Matches :** 10/164 fragment ions using 16 most intense peaks [\(help\)](#)

| #  | b                | b <sup>++</sup> | b <sup>+</sup> | b <sup>+++</sup> | b <sup>0</sup> | b <sup>0++</sup> | Seq. | y                | y <sup>++</sup> | y <sup>+</sup> | y <sup>+++</sup> | y <sup>0</sup> | y <sup>0++</sup> | #  |
|----|------------------|-----------------|----------------|------------------|----------------|------------------|------|------------------|-----------------|----------------|------------------|----------------|------------------|----|
| 1  | 58.0237          | 29.5180         |                |                  |                |                  | G    |                  |                 |                |                  |                |                  | 16 |
| 2  | 244.1081         | 122.5577        |                |                  |                |                  | W    | 1735.9246        | 868.4659        | 1718.8981      | 859.9527         | 1717.9140      | 859.4607         | 15 |
| 3  | 357.1921         | 179.0997        |                |                  |                |                  | L    | 1549.8453        | 775.4263        | 1532.8187      | 766.9130         | 1531.8347      | 766.4210         | 14 |
| 4  | 559.3511         | 280.1792        | 542.3246       | 271.6659         |                |                  | K    | 1436.7612        | 718.3843        | 1419.7347      | 710.3710         | 1418.7507      | 709.8790         | 13 |
| 5  | 646.3832         | 323.6952        | 629.3566       | 315.1819         | 628.3726       | 314.6899         | S    | <b>1234.6022</b> | 617.8047        | 1217.5757      | 609.2915         | 1216.5917      | 608.7995         | 12 |
| 7  | 760.4261         | 380.7167        | 743.3995       | 372.2034         | 742.4155       | 371.7114         | N    | <b>1147.5702</b> | 574.2887        | 1130.5436      | 565.7755         | 1129.5596      | 565.2835         | 11 |
| 7  | 859.4945         | 430.2509        | 842.4679       | 421.7376         | 841.4839       | 421.2456         | V    | <b>1033.5273</b> | 517.2673        | 1016.5007      | 508.7540         | 1015.5167      | 508.2620         | 10 |
| 8  | 946.5265         | 473.7669        | 929.5000       | 465.2536         | 928.5160       | 464.7616         | S    | <b>934.4589</b>  | 467.7331        | 917.4323       | 459.2198         | 916.4483       | 458.7278         | 9  |
| 9  | 1061.5535        | 531.2804        | 1044.5269      | 522.7671         | 1043.5429      | 522.2751         | D    | <b>847.4268</b>  | 424.2170        | 830.4003       | 415.7038         | 829.4163       | 415.2118         | 8  |
| 10 | 1132.5906        | 566.7989        | 1115.5640      | 558.2857         | 1114.5800      | 557.7936         | A    | 732.3999         | 366.7036        | 715.3733       | 358.1903         | 714.3893       | 357.6983         | 7  |
| 11 | 1231.6590        | 616.3331        | 1214.6324      | 607.8199         | 1213.6484      | 607.3279         | V    | <b>661.3628</b>  | 331.1850        | 644.3362       | 322.6717         | 643.3522       | 322.1797         | 6  |
| 12 | 1302.6961        | 651.8517        | 1285.6686      | 643.3384         | 1284.6855      | 642.8464         | A    | <b>562.2944</b>  | 281.6508        | 545.2678       | 273.1375         | 544.2838       | 272.6455         | 5  |
| 13 | <b>1430.7547</b> | 715.8810        | 1413.7281      | 707.3677         | 1412.7441      | 706.8757         | Q    | <b>491.2572</b>  | 246.1323        | 474.2307       | 237.6190         | 473.2467       | 237.1270         | 4  |
| 14 | 1517.7867        | 759.3970        | 1500.7602      | 750.8837         | 1499.7762      | 750.3917         | S    | <b>363.1987</b>  | 182.1030        | 346.1721       | 173.5897         | 345.1831       | 173.0977         | 3  |
| 15 | 1618.8344        | 809.9208        | 1601.8078      | 801.4076         | 1600.8238      | 800.9156         | T    | 276.1666         | 138.5870        | 259.1401       | 130.0737         | 258.1561       | 129.5817         | 2  |
| 16 |                  |                 |                |                  |                |                  | R    | 175.1190         | 88.0631         | 158.0924       | 79.5498          |                |                  | 1  |

MS/MS Fragmentation of **AKAKKVGAR**  
 Found in **E9PFK5**, Nucleolar protein 14 OS=Homo sapiens GN=NOI14 PE=2 SV=1

Match to Query 3442: 1169.739468 from(585.877010, 2+) intensity(85083.2891)  
 Title: File440 Spectrum11741 scans: 13209  
 Data file \\192.168.1.104\public\raw data\Elite\_01\methylation\_ZW\SW620\2013-6-5-SW620-Kpropio-methyl-IP-Fr11-ZW.mgf

Click mouse within plot area to zoom in by factor of two about that point  
 Or,   to  Da   
 Label all possible matches  Label matches used for scoring

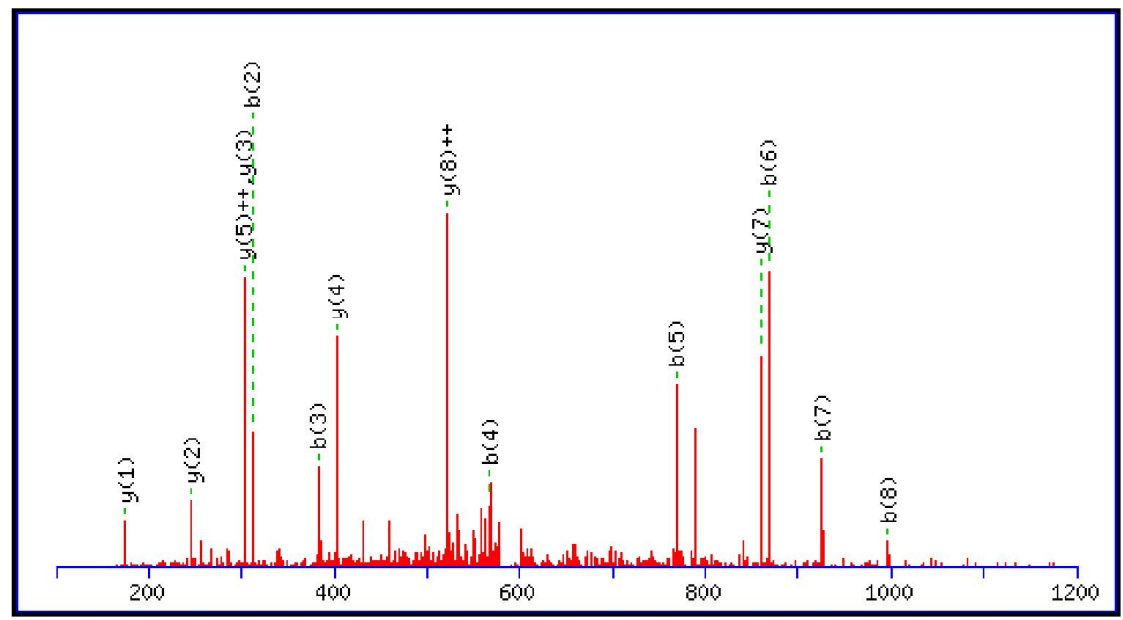

**Monoisotopic mass of neutral peptide Mr(calc):** 1169.7404  
**Fixed modifications:** Carbamidomethyl (C) (apply to specified residues only)  
**Variable modifications:**  
**N-term :** Propionyl (protein N-term) (Protein N-term)  
**K2 :** Propionyl (K)  
**K4 :** Propionyl (K)  
**K5 :** Propionyl-(13CD3)Methyl (K)  
**Ions Score:** 58 **Expect:** 0.00022  
**Matches :** 14/62 fragment ions using 20 most intense peaks ([help](#))

| # | b               | b <sup>++</sup> | b*       | b <sup>++</sup> * | Seq. | y               | y <sup>++</sup> | y*        | y <sup>++</sup> * | # |
|---|-----------------|-----------------|----------|-------------------|------|-----------------|-----------------|-----------|-------------------|---|
| 1 | 128.0706        | 64.5389         |          |                   | A    |                 |                 |           |                   | 9 |
| 2 | <b>312.1918</b> | 156.5995        | 295.1652 | 148.0863          | K    | 1043.6844       | <b>522.3459</b> | 1026.6579 | 513.8326          | 8 |
| 3 | <b>383.2289</b> | 192.1181        | 366.2023 | 183.6048          | A    | <b>859.5632</b> | 430.2853        | 842.5367  | 421.7720          | 7 |
| 4 | <b>567.3501</b> | 284.1787        | 550.3235 | 275.6654          | K    | 788.5261        | 394.7667        | 771.4996  | 386.2534          | 6 |
| 5 | <b>769.5091</b> | 385.2582        | 752.4825 | 376.7449          | K    | 604.4050        | <b>302.7061</b> | 587.3784  | 294.1928          | 5 |
| 6 | <b>868.5775</b> | 434.7924        | 851.5510 | 426.2791          | V    | <b>402.2459</b> | 201.6266        | 385.2194  | 193.1133          | 4 |
| 7 | <b>925.5990</b> | 463.3031        | 908.5724 | 454.7898          | G    | <b>303.1775</b> | 152.0924        | 286.1510  | 143.5791          | 3 |
| 8 | <b>996.6361</b> | 498.8217        | 979.6095 | 490.3084          | A    | <b>246.1561</b> | 123.5817        | 229.1295  | 115.0684          | 2 |
| 9 |                 |                 |          |                   | R    | <b>175.1190</b> | 88.0631         | 158.0924  | 79.5498           | 1 |

MS/MS Fragmentation of **FKETNDKAE**LDK

Found in **Q13123**, Protein Red OS=Homo sapiens GN=IK PE=1 SV=3

Match to Query 9195: 1594.812348 from(798.413450, 2+) intensity(10038.9229)

Title: File443 Spectrum9068 scans: 10462

Data file \\192.168.1.104\public\raw data\Elite\_01\methylation\_ZW\SW620\2013-6-6-SW620-Kpropio-methyl-IP-Fr15-ZW.mgf

Click mouse within plot area to zoom in by factor of two about that point

Or,   to  Da

Label all possible matches  Label matches used for scoring

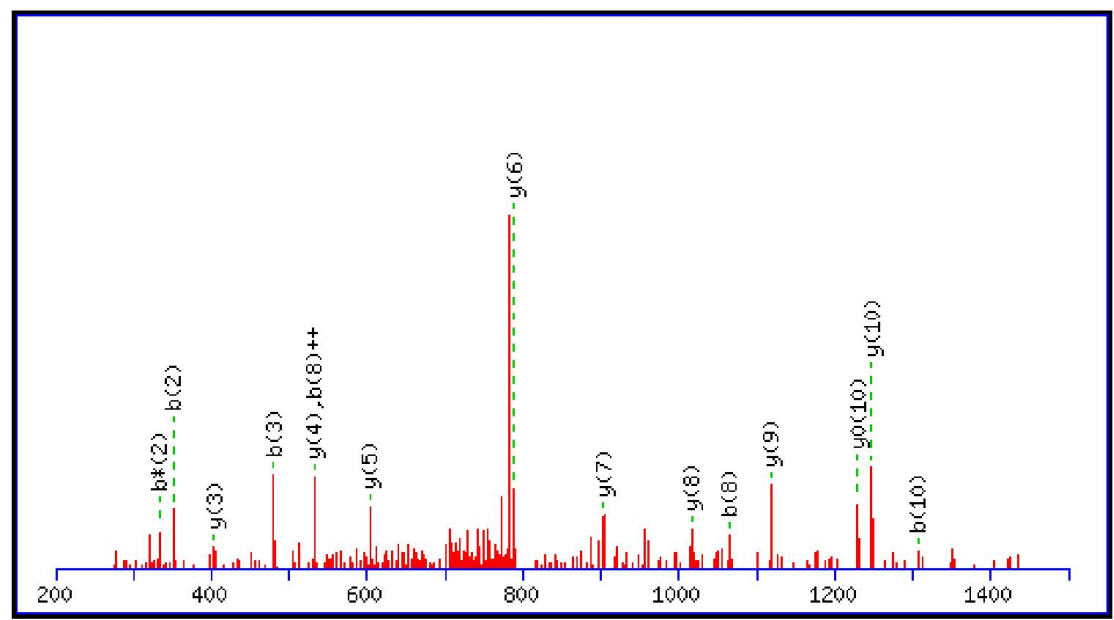

**Monoisotopic mass of neutral peptide Mr(calc):** 1594.8111

**Fixed modifications:** Carbamidomethyl (C) (apply to specified residues or termini only)

**Variable modifications:**

**K2** : Propionyl-(13CD3)Methyl (K)

**K7** : Propionyl (K)

**Ions Score:** 52 **Expect:** 0.0026

**Matches :** 15/124 fragment ions using 24 most intense peaks ([help](#))

| #  | b                | b <sup>++</sup> | b*              | b <sup>++</sup> | b <sup>0</sup> | b <sup>0++</sup> | Seq.     | y                | y <sup>++</sup> | y*        | y <sup>++</sup> | y <sup>0</sup>   | y <sup>0++</sup> | #  |
|----|------------------|-----------------|-----------------|-----------------|----------------|------------------|----------|------------------|-----------------|-----------|-----------------|------------------|------------------|----|
| 1  | 148.0757         | 74.5415         |                 |                 |                |                  | <b>F</b> |                  |                 |           |                 |                  |                  | 12 |
| 2  | <b>350.2347</b>  | 175.6210        | <b>333.2082</b> | 167.1077        |                |                  | <b>K</b> | 1448.7500        | 724.8786        | 1431.7234 | 716.3654        | 1430.7394        | 715.8734         | 11 |
| 3  | <b>479.2773</b>  | 240.1423        | 462.2507        | 231.6290        | 461.2667       | 231.1370         | <b>E</b> | <b>1246.5910</b> | 623.7991        | 1229.5644 | 615.2859        | <b>1238.5804</b> | 614.7938         | 10 |
| 4  | 580.3250         | 290.6661        | 563.2984        | 282.1529        | 562.3144       | 281.6608         | <b>T</b> | <b>1117.5484</b> | 559.2778        | 1100.5218 | 550.7646        | 1099.5378        | 550.2726         | 9  |
| 5  | 694.3679         | 347.6876        | 677.3414        | 339.1743        | 676.3573       | 338.6823         | <b>N</b> | <b>1016.5007</b> | 508.7540        | 999.4742  | 500.2407        | 998.4901         | 499.7487         | 8  |
| 6  | 809.3948         | 405.2011        | 792.3683        | 396.6878        | 791.3843       | 396.1958         | <b>D</b> | <b>902.4578</b>  | 451.7325        | 885.4312  | 443.2193        | 884.4472         | 442.7272         | 7  |
| 7  | 993.5160         | 497.2616        | 976.4895        | 488.7484        | 975.5055       | 488.2564         | <b>K</b> | <b>787.4308</b>  | 394.2191        | 770.4043  | 385.7058        | 769.4203         | 385.2138         | 6  |
| 8  | <b>1064.5531</b> | <b>532.7802</b> | 1047.5266       | 524.2669        | 1046.5426      | 523.7749         | <b>A</b> | <b>603.3097</b>  | 302.1585        | 586.2831  | 293.6452        | 585.2991         | 293.1532         | 5  |
| 9  | 1193.5957        | 597.3015        | 1176.5692       | 588.7882        | 1175.5852      | 588.2962         | <b>E</b> | <b>532.2726</b>  | 266.6399        | 515.2460  | 258.1263        | 514.2620         | 257.6346         | 4  |
| 10 | <b>1306.6798</b> | 653.2435        | 1289.6532       | 645.3303        | 1288.6692      | 644.8383         | <b>L</b> | <b>403.2300</b>  | 202.1186        | 386.2034  | 193.6053        | 385.2194         | 193.1133         | 3  |
| 11 | 1421.7067        | 711.3570        | 1404.6802       | 702.8437        | 1403.6962      | 702.3517         | <b>D</b> | 290.1959         | 145.5766        | 273.1193  | 137.0633        | 272.1353         | 136.5713         | 2  |
| 12 |                  |                 |                 |                 |                |                  | <b>R</b> | 175.1190         | 88.0631         | 158.0924  | 79.5498         |                  |                  | 1  |

MS/MS Fragmentation of **VTQKSYKVSTSGPR**Found in **P05787**, Keratin, type II cytoskeletal 8 OS=Homo sapiens GN=KRT8 PE=1 SV=7

Match to Query 10634: 1666.915508 from(834.465030, 2+) intensity(25637.6309)

Title: File652 Spectrum7046 scans: 8207

Data file \\192.168.1.104\public\raw data\Elite\_01\methylation\_ZW\SW620\2013-6-18-SW620-Kpropio-methyl-IP-Fr10-ZW.mgf

Click mouse within plot area to zoom in by factor of two about that point

Or,   to  Da Label all possible matches  Label matches used for scoring 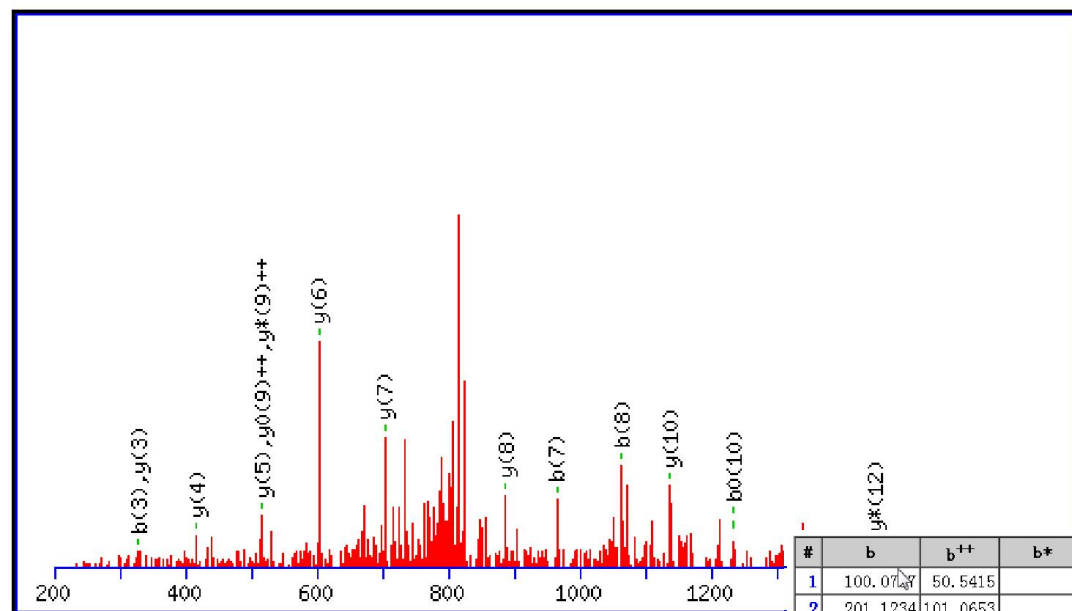**Monoisotopic mass of neutral peptide Mr(calc): 1666****Fixed modifications:** Carbamidomethyl (C) (apply to spec)**Variable modifications:****K4** : Propionyl-(13CD3)Methyl (K)**K7** : Propionyl (K)**Ions Score:** 52 **Expect:** 0.0035**Matches** : 14/144 fragment ions using 15 most intense peaks

| #  | b                | b <sup>++</sup> | b <sup>*</sup> | b <sup>*++</sup> | b <sup>0</sup>   | b <sup>0++</sup> | Seq. | y                | y <sup>++</sup> | y <sup>*</sup>   | y <sup>*++</sup> | y <sup>0</sup> | y <sup>0++</sup> | #  |
|----|------------------|-----------------|----------------|------------------|------------------|------------------|------|------------------|-----------------|------------------|------------------|----------------|------------------|----|
| 1  | 100.0737         | 50.5415         |                |                  |                  |                  | V    |                  |                 |                  |                  |                |                  | 14 |
| 2  | 201.1234         | 101.0653        |                |                  | 183.1128         | 92.0600          | T    | 1568.8551        | 784.9312        | 1551.8286        | 776.4179         | 1550.8446      | 775.9259         | 13 |
| 3  | <b>329.1819</b>  | 165.0946        | 312.1554       | 156.5813         | 311.1714         | 156.0893         | Q    | 1467.8075        | 734.4074        | <b>1450.7809</b> | 725.8941         | 1449.7969      | 725.4021         | 12 |
| 4  | 531.3410         | 266.1741        | 514.3144       | 257.6608         | 513.3304         | 257.1688         | K    | 1339.7489        | 670.3781        | 1322.7223        | 661.8648         | 1321.7383      | 661.3728         | 11 |
| 5  | 618.3730         | 309.6901        | 601.3464       | 301.1769         | 600.3624         | 300.6848         | S    | <b>1137.5899</b> | 569.2986        | 1120.5633        | 560.7853         | 1119.5793      | 560.2933         | 10 |
| 6  | 781.4363         | 391.2218        | 764.4098       | 382.7085         | 763.4258         | 382.2165         | Y    | 1050.5578        | 525.7826        | 1033.5313        | <b>517.2693</b>  | 1032.5473      | <b>516.7773</b>  | 9  |
| 7  | <b>965.5575</b>  | 483.2824        | 948.5309       | 474.7691         | 947.5469         | 474.2771         | K    | <b>887.4945</b>  | 444.2509        | 870.4680         | 435.7376         | 869.4839       | 435.2456         | 8  |
| 8  | <b>1064.6259</b> | 532.8166        | 1047.5994      | 524.3033         | 1046.6153        | 523.8113         | V    | <b>703.3733</b>  | 352.1903        | 686.3468         | 343.6770         | 685.3628       | 343.1850         | 7  |
| 9  | 1151.6579        | 576.3326        | 1134.6314      | 567.8193         | 1133.6474        | 567.3273         | S    | <b>604.3049</b>  | 302.6561        | 587.2784         | 294.1428         | 586.2944       | 293.6508         | 6  |
| 10 | 1252.7056        | 626.3564        | 1235.6791      | 618.3432         | <b>1234.6951</b> | 617.8512         | T    | <b>517.2729</b>  | 259.1401        | 500.2463         | 250.6268         | 499.2623       | 250.1348         | 5  |
| 11 | 1339.7376        | 670.3725        | 1322.7111      | 661.8592         | 1321.7271        | 661.3672         | S    | <b>416.2252</b>  | 208.6162        | 399.1987         | 200.1030         | 398.2146       | 199.6110         | 4  |
| 12 | 1396.7591        | 698.8832        | 1379.7326      | 690.3699         | 1378.7485        | 689.8779         | G    | <b>329.1932</b>  | 165.1002        | 312.1666         | 156.5870         |                |                  | 3  |
| 13 | 1493.8119        | 747.4096        | 1476.7853      | 738.8963         | 1475.8013        | 738.4043         | P    | 272.1717         | 136.5895        | 255.1452         | 128.0762         |                |                  | 2  |
| 14 |                  |                 |                |                  |                  |                  | R    | 175.1190         | 88.0631         | 158.0924         | 79.5498          |                |                  | 1  |

MS/MS Fragmentation of **EHLEKKGQVR**

Found in **F8VZY9**, Keratin, type I cytoskeletal 18 OS=Homo sapiens GN=KRT18 PE=2 SV=1

Match to Query 6782: 1449.824928 from(725.919740, 2+) intensity(66155.8906)

Title: File388 Spectrum6492 scans: 7687

Data file \\192.168.1.104\public\raw data\Elite\_01\methylation\_ZW\SW620\2013-5-16-620-Kpropio-methyl-IP-Fr16-ZW.mgf

Click mouse within plot area to zoom in by factor of two about that point

Or,   to  Da

Label all possible matches  Label matches used for scoring

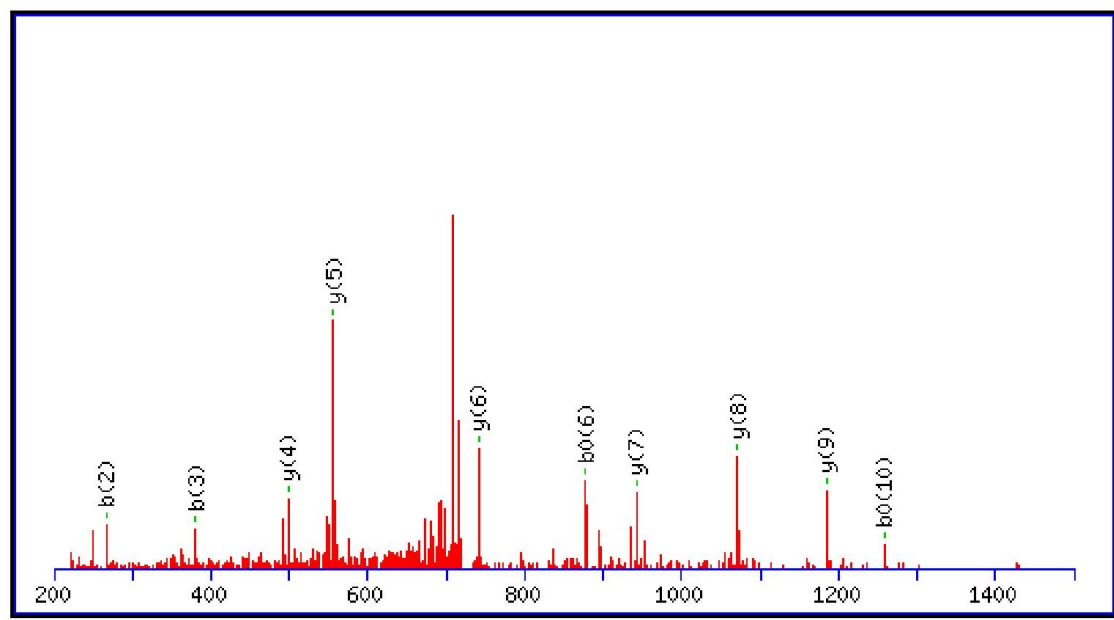

**Monoisotopic mass of neutral peptide Mr(calc): 1449.8212**

**Fixed modifications:** Carbamidomethyl (C) (apply to specified residues or termini only)

**Variable modifications:**

**K5** : Propionyl-(13CD3)Methyl (K)

**K6** : Propionyl (K)

**Ions Score:** 52 **Expect:** 0.0028

**Matches** : 10/98 fragment ions using 12 most intense peaks ([help](#))

| #  | b               | b <sup>++</sup> | b <sup>+</sup> | b <sup>+++</sup> | b <sup>0</sup>   | b <sup>0++</sup> | Seq. | y                | y <sup>++</sup> | y <sup>+</sup> | y <sup>+++</sup> | y <sup>0</sup> | y <sup>0++</sup> | #  |
|----|-----------------|-----------------|----------------|------------------|------------------|------------------|------|------------------|-----------------|----------------|------------------|----------------|------------------|----|
| 1  | 130.0499        | 65.5286         |                |                  | 112.0393         | 56.5233          | K    |                  |                 |                |                  |                |                  | 11 |
| 2  | <b>267.1088</b> | 134.0580        |                |                  | 249.0982         | 125.0527         | H    | 1321.7859        | 661.3966        | 1304.7594      | 652.8833         | 1303.7754      | 652.3913         | 10 |
| 3  | <b>380.1928</b> | 190.6001        |                |                  | 362.1823         | 181.5948         | L    | <b>1184.7270</b> | 592.3871        | 1167.7005      | 584.3539         | 1166.7165      | 583.9619         | 9  |
| 4  | 509.2354        | 255.1214        |                |                  | 491.2249         | 246.1161         | K    | <b>1071.6430</b> | 536.3251        | 1054.6164      | 527.8118         | 1053.6324      | 527.3188         | 8  |
| 5  | 711.3945        | 356.2009        | 694.3679       | 347.6876         | 693.3839         | 347.1956         | K    | <b>942.6004</b>  | 471.8038        | 925.5738       | 463.2905         |                |                  | 7  |
| 6  | 895.5156        | 448.2615        | 878.4891       | 439.7482         | <b>877.5051</b>  | 439.2562         | K    | <b>740.4413</b>  | 370.7243        | 723.4148       | 362.2110         |                |                  | 6  |
| 7  | 952.5371        | 476.7722        | 935.5105       | 468.2589         | 934.5265         | 467.7669         | G    | <b>556.3202</b>  | 278.6637        | 539.2936       | 270.1504         |                |                  | 5  |
| 8  | 1049.5899       | 525.2986        | 1032.5633      | 516.7853         | 1031.5793        | 516.2933         | P    | <b>499.2987</b>  | 250.1530        | 482.2722       | 241.6397         |                |                  | 4  |
| 9  | 1177.6484       | 589.3279        | 1160.6219      | 580.8146         | 1159.6379        | 580.3226         | Q    | 402.2459         | 201.6266        | 385.2194       | 193.1133         |                |                  | 3  |
| 10 | 1276.7168       | 638.3621        | 1259.6903      | 630.3488         | <b>1258.7063</b> | 629.8568         | V    | 274.1874         | 137.5973        | 257.1608       | 129.0840         |                |                  | 2  |
| 11 |                 |                 |                |                  |                  |                  | R    | 175.1190         | 88.0631         | 158.0924       | 79.5498          |                |                  | 1  |

MS/MS Fragmentation of **ISFKGALSEEQMR**Found in **F8VQX1**, RasGAP-activating-like protein 1 OS=Homo sapiens GN=RASAL1 PE=2 SV=1

Match to Query 8201: 1572.835788 from(787.425170,2+) intensity(259861.9531)

Title: File388 Spectrum14427 scans: 16181

Data file \\192.168.1.104\public\raw data\Elite\_01\methylation\_ZW\SW620\2013-5-16-620-Kpropio-methyl-IP-Fr16-ZW.mgf

Click mouse within plot area to zoom in by factor of two about that point

Or,   to  Da Label all possible matches  Label matches used for scoring 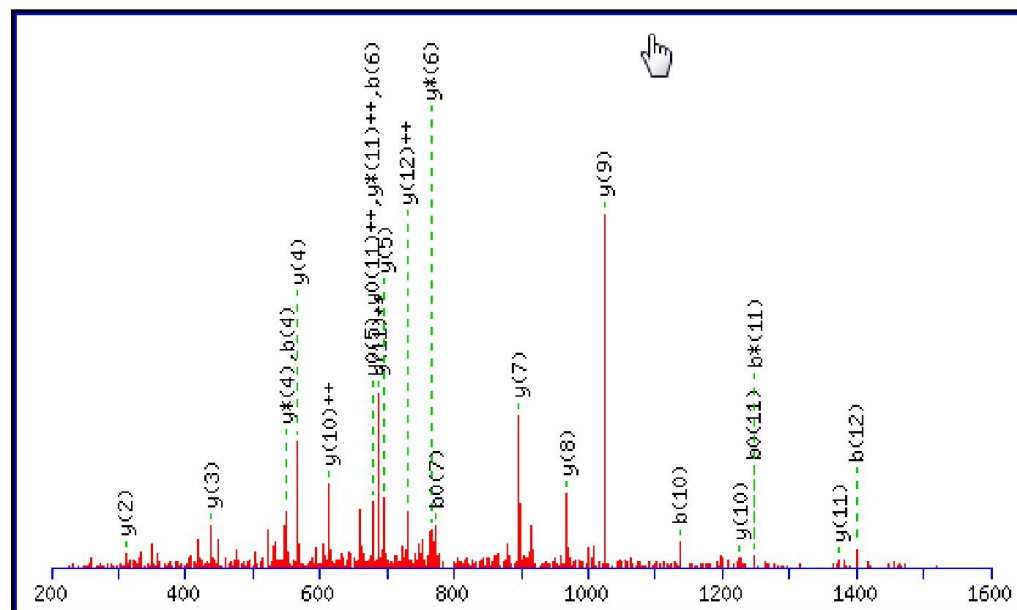Monoisotopic mass of neutral peptide  $M_r(\text{calc})$ : 1572.8363

Fixed modifications: Carbamidomethyl (C) (apply to specified residues or termini only)

Variable modifications:

K4 : Propionyl-(13C3)Methyl (K)

M12 : Label:13C(1)2H(3) (M)

Ions Score: 51 Expect: 0.0046

Matches : 24/130 fragment ions using 39 most intense peaks ([help](#))

| #  | b         | b <sup>++</sup> | b*        | b <sup>+++</sup> | b <sup>0</sup> | b <sup>0++</sup> | Seq. | y         | y <sup>++</sup> | y*        | y <sup>+++</sup> | y <sup>0</sup> | y <sup>0++</sup> | #  |
|----|-----------|-----------------|-----------|------------------|----------------|------------------|------|-----------|-----------------|-----------|------------------|----------------|------------------|----|
| 1  | 114.0913  | 57.5493         |           |                  |                |                  | I    |           |                 |           |                  |                |                  | 13 |
| 2  | 201.1234  | 101.0653        |           |                  | 183.1128       | 92.0600          | S    | 1460.7595 | 730.8834        | 1443.7330 | 722.3701         | 1442.7489      | 721.8781         | 12 |
| 3  | 348.1918  | 174.5995        |           |                  | 330.1812       | 165.5942         | F    | 1373.7275 | 687.3674        | 1356.7009 | 678.8541         | 1355.7169      | 678.5621         | 11 |
| 4  | 550.3508  | 275.6790        | 533.3242  | 267.1658         | 532.3402       | 266.6738         | K    | 1226.6591 | 613.8332        | 1209.6325 | 605.3199         | 1208.6485      | 604.8279         | 10 |
| 5  | 607.3723  | 304.1898        | 590.3457  | 295.6765         | 589.3617       | 295.1845         | G    | 1024.5001 | 512.7537        | 1007.4735 | 504.2404         | 1006.4895      | 503.7484         | 9  |
| 6  | 678.4094  | 339.7083        | 661.3828  | 331.1950         | 660.3988       | 330.7030         | A    | 967.4786  | 484.2429        | 950.4520  | 475.7297         | 949.4680       | 475.2377         | 8  |
| 7  | 791.4934  | 396.2504        | 774.4669  | 387.7371         | 773.4829       | 387.2451         | L    | 896.4415  | 448.7244        | 879.4149  | 440.2111         | 878.4309       | 439.7191         | 7  |
| 8  | 878.5255  | 439.7664        | 861.4989  | 431.2531         | 860.5149       | 430.7611         | S    | 783.3574  | 392.1823        | 766.3309  | 383.6691         | 765.3468       | 383.1771         | 6  |
| 9  | 1007.5681 | 504.2877        | 990.5415  | 495.7744         | 989.5575       | 495.2824         | E    | 696.3254  | 348.6663        | 679.2988  | 340.1531         | 678.3148       | 339.6610         | 5  |
| 10 | 1136.6107 | 568.8090        | 1119.5841 | 560.2957         | 1118.6001      | 559.3037         | E    | 567.2828  | 284.1450        | 550.2562  | 275.6318         | 549.2722       | 275.1398         | 4  |
| 11 | 1264.6692 | 632.8383        | 1247.6427 | 624.3250         | 1246.6587      | 623.8330         | Q    | 438.3403  | 219.6237        | 421.2137  | 211.1105         |                |                  | 3  |
| 12 | 1399.7319 | 700.3696        | 1382.7054 | 691.8563         | 1381.7213      | 691.3643         | K    | 310.1816  | 155.5944        | 293.1551  | 147.0812         |                |                  | 2  |
| 13 |           |                 |           |                  |                |                  | R    | 175.1190  | 88.0631         | 158.0924  | 79.5498          |                |                  | 1  |



Found in **Q92499**, ATP-dependent RNA helicase DDX1 OS=Homo sapiens GN=DDX1 PE=1 SV=2

Match to Query 1229: 883.551368 from(442.782960,2+) intensity(23381.2656)

Title: File394 Spectrum4245 scans: 5060

Data file \\192.168.1.104\public\raw data\Elite\_01\methylation\_ZW\SW620\2013-5-16-620-Kpropio-methyl-IP-Fr8-ZW.mgf

Click mouse within plot area to zoom in by factor of two about that point

Or,   to  Da Label all possible matches  Label matches used for scoring 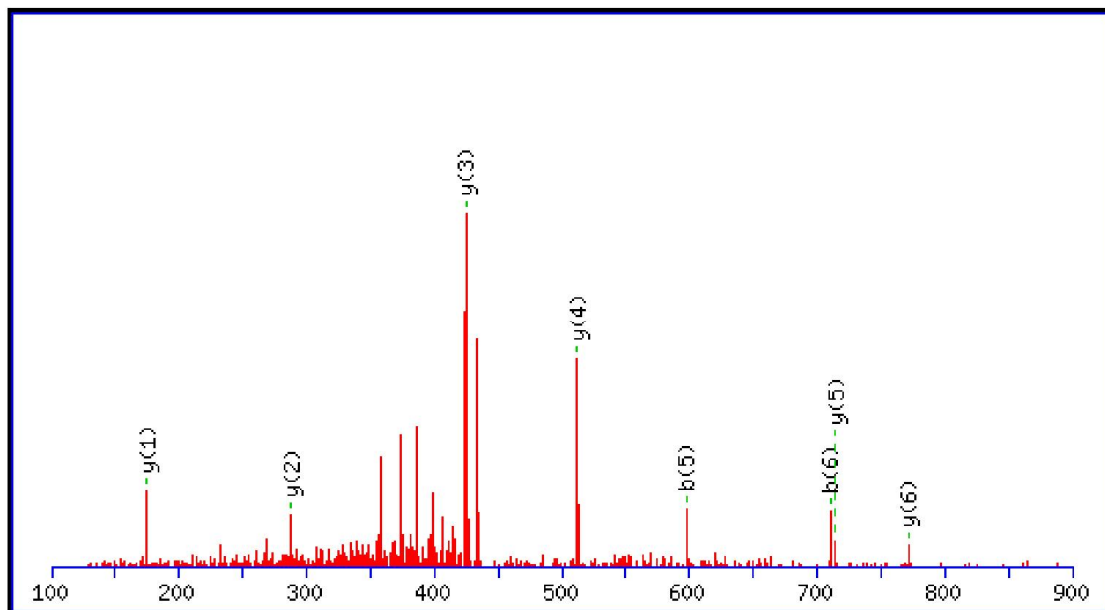**Monoisotopic mass of neutral peptide Mr(calc):** 883.5512**Fixed modifications:** Carbamidomethyl (C) (apply to specified residues or termini only)**Variable modifications:****K3** : Propionyl-(13CD3)Methyl (K)**Ions Score:** 47 **Expect:** 0.0034**Matches** : 8/56 fragment ions using 16 most intense peaks [\(help\)](#)

| # | b               | b <sup>++</sup> | b*       | b <sup>+++</sup> | b <sup>0</sup> | b <sup>0++</sup> | Seq. | y               | y <sup>++</sup> | y*       | y <sup>+++</sup> | y <sup>0</sup> | y <sup>0++</sup> | # |
|---|-----------------|-----------------|----------|------------------|----------------|------------------|------|-----------------|-----------------|----------|------------------|----------------|------------------|---|
| 1 | 114.0913        | 57.5493         |          |                  |                |                  | L    |                 |                 |          |                  |                |                  | 7 |
| 2 | 171.1128        | 86.0600         |          |                  |                |                  | G    | <b>771.4744</b> | 386.2409        | 754.4479 | 377.7276         | 753.4639       | 377.2356         | 6 |
| 3 | 373.2718        | 187.1395        | 356.2453 | 178.6263         |                |                  | K    | <b>714.4530</b> | 357.7301        | 697.4264 | 349.2168         | 696.4424       | 348.7248         | 5 |
| 4 | 460.3038        | 230.6558        | 443.2773 | 222.1423         | 442.2933       | 221.6503         | S    | <b>512.2940</b> | 256.6506        | 495.2674 | 248.1373         | 494.2834       | 247.6453         | 4 |
| 5 | <b>597.3628</b> | 299.1850        | 580.3362 | 290.6717         | 579.3522       | 290.1797         | H    | <b>425.2619</b> | 213.1346        | 408.2354 | 204.6213         |                |                  | 3 |
| 6 | <b>710.4468</b> | 355.7270        | 693.4203 | 347.2138         | 692.4363       | 346.7218         | I    | <b>288.2030</b> | 144.6051        | 271.1765 | 136.0919         |                |                  | 2 |
| 7 |                 |                 |          |                  |                |                  | R    | <b>175.1190</b> | 88.0631         | 158.0924 | 79.5498          |                |                  | 1 |

MS/MS Fragmentation of **QVLKQKHLDDCLR**

Found in **B5MC16**, Calmodulin-lysine N-methyltransferase OS=Homo sapiens GN=CAMKMT PE=2 SV=1

Match to Query 12314: 1781.972268 from(891.993410, 2+) intensity(25075.1875)

Title: File394 Spectrum11155 scans: 12533

Data file \\192.168.1.104\public\raw data\Elite\_01\methylation\_ZW\SW620\2013-5-16-620-Kpropio-methyl-IP-Fr8-ZW.mgf

Click mouse within plot area to zoom in by factor of two about that point

Or,   to  Da

Label all possible matches  Label matches used for scoring

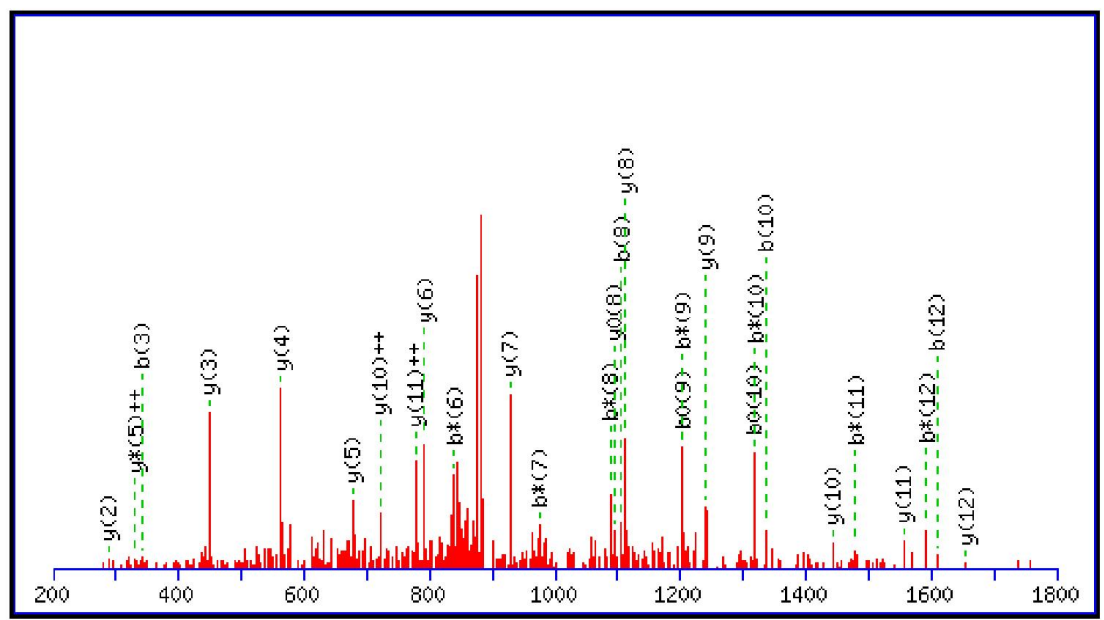

**Monoisotopic mass of neutral peptide Mr(calc):** 1781.9731

**Fixed modifications:** Carbamidomethyl (C) (apply to specified residues or

**Variable modifications:**

**K4** : Propionyl-(13CD3)Methyl (K)

**K6** : Propionyl (K)

**Ions Score:** 47 **Expect:** 0.011

**Matches** : 28/122 fragment ions using 72 most intense peaks ([help](#))

| #  | b         | b <sup>++</sup> | b <sup>+</sup> | b <sup>++</sup> | b <sup>0</sup> | b <sup>0++</sup> | Seq. | y | y <sup>++</sup> | y <sup>+</sup> | y <sup>++</sup> | y <sup>0</sup> | y <sup>0++</sup> | #        |    |
|----|-----------|-----------------|----------------|-----------------|----------------|------------------|------|---|-----------------|----------------|-----------------|----------------|------------------|----------|----|
| 1  | 129.0659  | 65.0366         | 112.0393       | 56.5233         |                |                  |      | Q |                 |                |                 |                |                  | 13       |    |
| 2  | 228.1343  | 114.5708        | 211.1077       | 106.0575        |                |                  |      | V | 1654.9218       | 827.9645       | 1637.8952       | 819.4513       | 1636.9112        | 818.9592 | 12 |
| 3  | 341.2183  | 171.1123        | 324.1918       | 162.5995        |                |                  |      | L | 1555.8534       | 775.4303       | 1538.8268       | 769.9170       | 1537.8428        | 769.4250 | 11 |
| 4  | 543.3773  | 272.1923        | 526.3508       | 263.6790        |                |                  |      | K | 1442.7693       | 721.8883       | 1425.7427       | 713.3750       | 1424.7587        | 712.8830 | 10 |
| 5  | 671.4359  | 336.2216        | 654.4094       | 327.7083        |                |                  |      | Q | 1240.6103       | 620.8088       | 1223.5837       | 612.2955       | 1222.5997        | 611.8035 | 9  |
| 6  | 855.5571  | 428.2822        | 838.5306       | 419.7689        |                |                  |      | K | 1112.5517       | 556.7795       | 1095.5252       | 548.2662       | 1094.5411        | 547.7742 | 8  |
| 7  | 992.6160  | 496.8116        | 975.5895       | 488.2984        |                |                  |      | H | 928.4305        | 464.7189       | 911.4040        | 456.2056       | 910.4200         | 455.7136 | 7  |
| 8  | 1105.7001 | 553.3537        | 1088.6735      | 544.8404        |                |                  |      | L | 791.3716        | 396.1894       | 774.3451        | 387.6762       | 773.3610         | 387.1842 | 6  |
| 9  | 1220.7270 | 610.8671        | 1203.7005      | 602.3539        | 1202.7165      | 601.8619         |      | D | 678.2876        | 339.6474       | 661.2610        | 331.1341       | 660.2770         | 330.6421 | 5  |
| 10 | 1335.7540 | 668.3806        | 1318.7274      | 659.8673        | 1317.7434      | 659.3753         |      | D | 563.2606        | 282.1339       | 546.2341        | 273.6207       | 545.2500         | 273.1287 | 4  |
| 11 | 1495.7846 | 748.3959        | 1478.7581      | 739.8827        | 1477.7740      | 739.3907         |      | C | 448.2337        | 224.6205       | 431.2071        | 216.1072       |                  |          | 3  |
| 12 | 1608.8687 | 804.9380        | 1591.8421      | 796.4247        | 1590.8581      | 795.9327         |      | L | 288.2030        | 144.6051       | 271.1765        | 136.0919       |                  |          | 2  |
| 13 |           |                 |                |                 |                |                  |      | R | 175.1190        | 88.0631        | 158.0924        | 79.5498        |                  |          | 1  |

MS/MS Fragmentation of **KVAKEGGPKVTSR**Found in **Q15397**, Pumilio domain-containing protein KIAA0020 OS=Homo sapiens GN=KIAA0020 PE=1 SV=3

Match to Query 8103: 1541.904628 from(771.959590, 2+) intensity(8409.0791)

Title: File660 Spectrum5207 scans: 6344

Data file \\192.168.1.104\public\raw data\Elite\_01\methylation\_ZW\SW620\2013-6-18-SW620-Kpropio-methyl-IP-Fr3-ZW.mgf

Click mouse within plot area to zoom in by factor of two about that point

Or,   to  DaLabel all possible matches  Label matches used for scoring 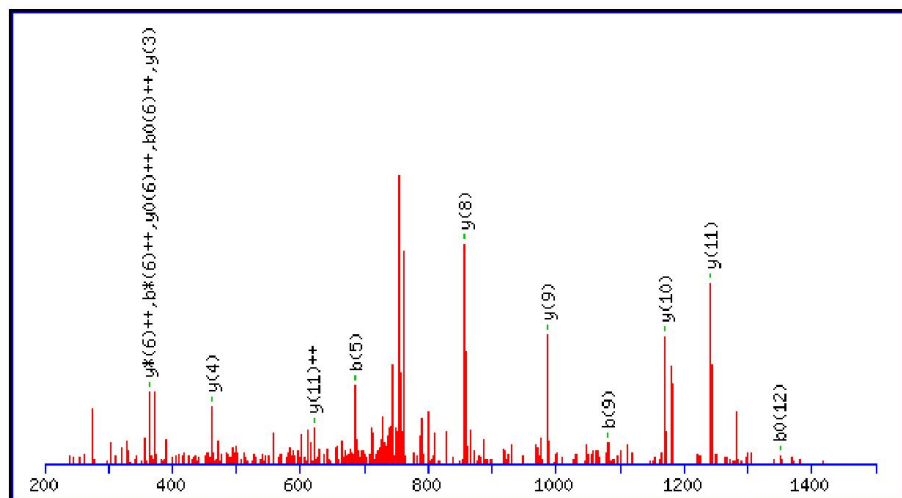**Monoisotopic mass of neutral peptide Mr(calc):** 1541.9050**Fixed modifications:** Carbamidomethyl (C) (apply to specified residues or termini only)**Variable modifications:****K1** : Propionyl-(13CD3)Methyl (K)**K4** : Propionyl (K)**K9** : Propionyl (K)**Ions Score:** 47 **Expect:** 0.0068**Matches** : 14/134 fragment ions using 12 most intense peaks ([help](#))

| #  | b                | b <sup>++</sup> | b*        | b <sup>+++</sup> | b <sup>0</sup>   | b <sup>0++</sup> | Seq.     | y                | y <sup>++</sup> | y*        | y <sup>+++</sup> | y <sup>0</sup> | y <sup>0++</sup> | #  |
|----|------------------|-----------------|-----------|------------------|------------------|------------------|----------|------------------|-----------------|-----------|------------------|----------------|------------------|----|
| 1  | 203.1663         | 102.0868        | 186.1397  | 93.5735          |                  |                  | <b>K</b> |                  |                 |           |                  |                |                  | 13 |
| 2  | 302.2447         | 151.6210        | 285.2082  | 143.1077         |                  |                  | <b>V</b> | 1340.7532        | 670.8803        | 1323.7267 | 662.3670         | 1322.7427      | 661.8750         | 12 |
| 3  | 373.2718         | 187.1395        | 356.2453  | 178.6263         |                  |                  | <b>A</b> | <b>1241.6848</b> | <b>621.5461</b> | 1224.6583 | 612.8328         | 1223.6743      | 612.3408         | 11 |
| 4  | 557.3930         | 279.2001        | 540.3664  | 270.6869         |                  |                  | <b>K</b> | <b>1170.6477</b> | 585.8275        | 1153.6212 | 577.3142         | 1152.6371      | 576.8222         | 10 |
| 5  | <b>686.4356</b>  | 343.7214        | 669.4090  | 335.2082         | 668.4250         | 334.7161         | <b>E</b> | <b>986.5265</b>  | 493.7669        | 969.5000  | 485.2536         | 968.5160       | 484.7616         | 9  |
| 6  | 743.4571         | 372.2322        | 726.4305  | <b>363.7189</b>  | 725.4465         | <b>363.2269</b>  | <b>G</b> | <b>857.4839</b>  | 429.2456        | 840.4574  | 420.7323         | 839.4734       | 420.2403         | 8  |
| 7  | 800.4785         | 400.7429        | 783.4520  | 392.2296         | 782.4680         | 391.7376         | <b>G</b> | 800.4625         | 400.7349        | 783.4359  | 392.2216         | 782.4519       | 391.7296         | 7  |
| 8  | 897.5313         | 449.2693        | 880.5047  | 440.7560         | 879.5207         | 440.2640         | <b>P</b> | 743.4410         | 372.2241        | 726.4145  | <b>363.7109</b>  | 725.4305       | <b>363.2189</b>  | 6  |
| 9  | <b>1081.6525</b> | 541.3299        | 1064.6259 | 532.8168         | 1063.6419        | 532.3246         | <b>K</b> | 646.3883         | 323.6978        | 629.3617  | 315.1845         | 628.3777       | 314.6925         | 5  |
| 10 | 1180.7209        | 590.3641        | 1163.6943 | 582.3508         | 1162.7103        | 581.8588         | <b>V</b> | <b>462.2671</b>  | 231.6372        | 445.2405  | 223.1239         | 444.2565       | 222.6319         | 4  |
| 11 | 1281.7686        | 641.3879        | 1264.7420 | 632.8746         | 1263.7580        | 632.3826         | <b>T</b> | <b>363.1987</b>  | 182.1030        | 346.1721  | 173.5897         | 345.1881       | 173.0977         | 3  |
| 12 | 1368.8006        | 684.9039        | 1351.7740 | 676.3907         | <b>1350.7900</b> | 675.8986         | <b>S</b> | 262.1510         | 131.5791        | 245.1244  | 123.0659         | 244.1404       | 122.5738         | 2  |
| 13 |                  |                 |           |                  |                  |                  | <b>R</b> | 175.1190         | 88.0631         | 158.0924  | 79.5498          |                |                  | 1  |

Found in **Q5VZU9**, Tripeptidyl-peptidase 2 OS=Homo sapiens GN=TPP2 PE=2 SV=1

Match to Query 6361: 1436.803928 from(719.409240, 2+) intensity(69501.9375)

Title: File419 Spectrum10494 scans: 12112

Data file \\192.168.1.104\public\raw data\Elite\_01\methylation\_ZW\SW620\2013-06-05-SW620-Kpropio-methyl-IP-Fr9-ZW.mgf

Click mouse within plot area to zoom in by factor of two about that point

Or,   to  Da Label all possible matches  Label matches used for scoring 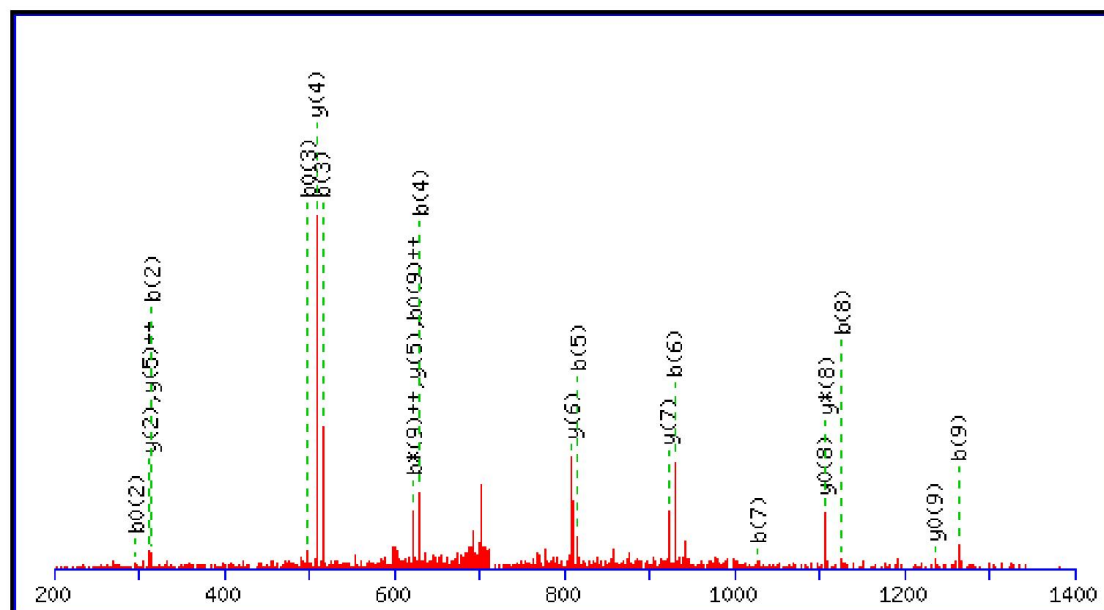**Monoisotopic mass of neutral peptide Mr(calc): 1436.8049****Fixed modifications:** Carbamidomethyl (C) (apply to specified residues or termini only)**Variable modifications:****K1** : Propionyl (K)**K3** : Propionyl-(13CD3)Methyl (K)**Ions Score: 47** **Expect: 0.011****Matches** : 21/98 fragment ions using 36 most intense peaks ([help](#))

| #  | b                | b <sup>++</sup> | b <sup>*</sup> | b <sup>*++</sup> | b <sup>0</sup>  | b <sup>0++</sup> | Seq.     | y               | y <sup>++</sup> | y <sup>*</sup>   | y <sup>*++</sup> | y <sup>0</sup>   | y <sup>0++</sup> | #  |
|----|------------------|-----------------|----------------|------------------|-----------------|------------------|----------|-----------------|-----------------|------------------|------------------|------------------|------------------|----|
| 1  | 185.1285         | 93.0679         | 168.1019       | 84.5546          |                 |                  | <b>K</b> |                 |                 |                  |                  |                  |                  | 10 |
| 2  | <b>314.1710</b>  | 157.5892        | 297.1445       | 149.0759         | <b>296.1605</b> | 148.5839         | <b>K</b> | 1253.6910       | 627.3491        | 1236.6644        | 618.8358         | <b>1235.6804</b> | 618.3438         | 9  |
| 3  | <b>516.3301</b>  | 258.6627        | 499.3035       | 250.1554         | <b>498.3195</b> | 249.6634         | <b>K</b> | 1124.6484       | 562.8278        | <b>1107.6218</b> | 554.3146         | <b>1106.6378</b> | 553.8225         | 8  |
| 4  | <b>629.4141</b>  | 315.2107        | 612.3876       | 306.6974         | 611.4036        | 306.2054         | <b>I</b> | <b>922.4894</b> | 461.7483        | 905.4628         | 453.2350         | 904.4788         | 452.7430         | 7  |
| 5  | <b>815.4934</b>  | 408.2504        | 798.4669       | 399.7371         | 797.4829        | 399.2451         | <b>W</b> | <b>809.4053</b> | 405.2063        | 792.3787         | 396.6930         | 791.3947         | 396.2010         | 6  |
| 6  | <b>930.5204</b>  | 465.7638        | 913.4938       | 457.2506         | 912.5098        | 456.7585         | <b>D</b> | <b>623.3260</b> | <b>312.1666</b> | 606.2994         | 303.6534         | 605.3154         | 303.1613         | 5  |
| 7  | <b>1027.5731</b> | 514.2902        | 1010.5466      | 505.7769         | 1009.5626       | 505.2849         | <b>P</b> | <b>508.2990</b> | 254.6532        | 491.2725         | 246.1399         |                  |                  | 4  |
| 8  | <b>1126.6416</b> | 563.8244        | 1109.6150      | 555.3111         | 1108.6310       | 554.8191         | <b>V</b> | 411.2463        | 206.1268        | 394.2197         | 197.6135         |                  |                  | 3  |
| 9  | <b>1263.7005</b> | 632.3539        | 1246.8739      | <b>623.8406</b>  | 1245.6899       | <b>623.3486</b>  | <b>H</b> | <b>312.1779</b> | 156.5926        | 295.1513         | 148.0793         |                  |                  | 2  |
| 10 |                  |                 |                |                  |                 |                  | <b>R</b> | 175.1190        | 88.0631         | 158.0924         | 79.5498          |                  |                  | 1  |

MS/MS Fragmentation of **SLVIVKKLNTR**

Found in **Q8N655**, Uncharacterized protein C10orf12 OS=Homo sapiens GN=C10orf12 PE=1 SV=1

Match to Query 6095: 1399.904768 from(700.959660, 2+) intensity(79978.1953)

Title: File388 Spectrum15903 scans: 17797

Data file \\192.168.1.104\public\raw data\Elite\_01\methylation\_ZW\SW620\2013-5-16-620-Kpropio-methyl-IP-Fr16-ZW.mgf

Click mouse within plot area to zoom in by factor of two about that point

Or,   to  Da

Label all possible matches  Label matches used for scoring

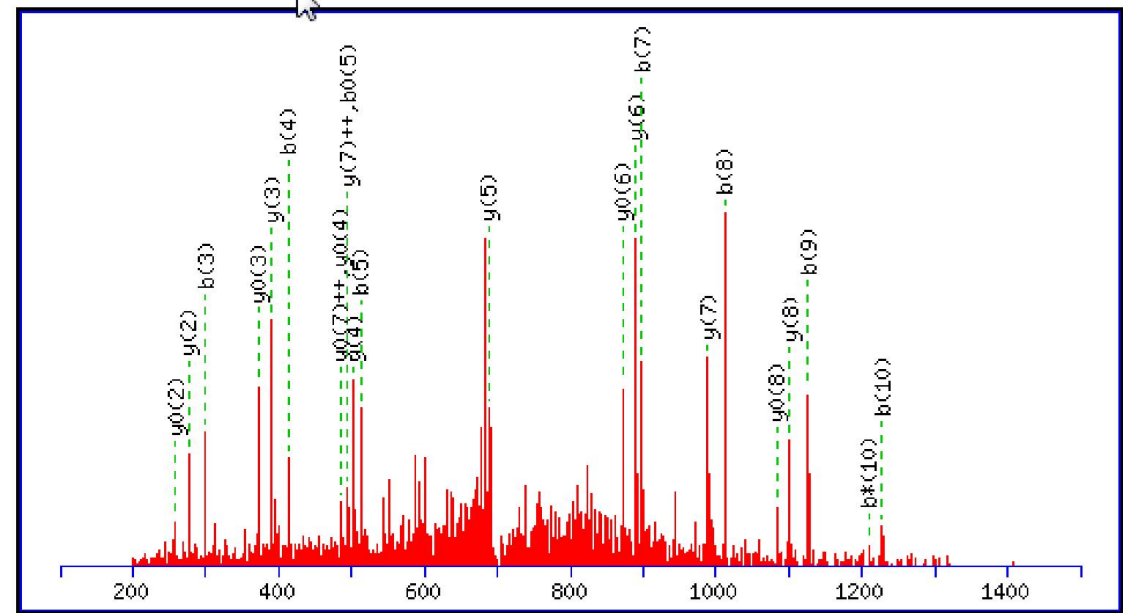

**Monoisotopic mass of neutral peptide Mr(calc):** 1399.9035

**Fixed modifications:** Carbamidomethyl (C) (apply to specified residues only)

**Variable modifications:**

**K6** : Propionyl-(13CD3)Methyl (K)

**K7** : Propionyl (K)

**Ions Score:** 46 **Expect:** 0.0015

**Matches :** 23/108 fragment ions using 36 most intense peaks [\(help\)](#)

| #  | b                | b <sup>++</sup> | b <sup>*</sup>   | b <sup>++</sup> | b <sup>0</sup>  | b <sup>0++</sup> | Seq. | y                | y <sup>++</sup> | y <sup>*</sup> | y <sup>++</sup> | y <sup>0</sup>   | y <sup>0++</sup> | #  |
|----|------------------|-----------------|------------------|-----------------|-----------------|------------------|------|------------------|-----------------|----------------|-----------------|------------------|------------------|----|
| 1  | 88.0393          | 44.5233         |                  |                 | 70.0287         | 35.5180          | S    |                  |                 |                |                 |                  |                  | 11 |
| 2  | 201.1234         | 101.0653        |                  |                 | 183.1128        | 92.0500          | L    | 1313.8788        | 657.4430        | 1296.8522      | 648.9297        | 1295.8682        | 648.4377         | 10 |
| 3  | <b>300.1918</b>  | 150.5996        |                  |                 | 282.1812        | 141.5942         | Y    | 1200.7947        | 600.9010        | 1183.7682      | 592.3877        | 1182.7841        | 591.8967         | 9  |
| 4  | <b>413.2758</b>  | 207.1416        |                  |                 | 395.2653        | 198.1363         | I    | <b>1101.7263</b> | 551.3668        | 1084.6997      | 542.8535        | <b>1083.7157</b> | 542.3615         | 8  |
| 5  | <b>512.3443</b>  | 256.6758        |                  |                 | <b>494.3337</b> | 247.6705         | Y    | <b>988.6422</b>  | <b>494.3248</b> | 971.6157       | 486.3115        | 970.6317         | <b>485.8195</b>  | 7  |
| 6  | 714.5033         | 357.7553        | 697.4767         | 349.2420        | 696.4927        | 348.7500         | K    | <b>889.5738</b>  | 445.2905        | 872.5473       | 436.7773        | <b>871.5632</b>  | 436.2853         | 6  |
| 7  | <b>898.6245</b>  | 449.8159        | 881.5979         | 441.3026        | 880.6139        | 440.8106         | K    | <b>687.4148</b>  | 344.2110        | 670.3883       | 335.6978        | 669.4042         | 335.2068         | 5  |
| 8  | <b>1011.7085</b> | 506.3579        | 994.6820         | 497.8446        | 993.6979        | 497.3526         | L    | <b>503.2936</b>  | 252.1504        | 486.2671       | 243.6372        | <b>485.2831</b>  | 243.1452         | 4  |
| 9  | <b>1125.7514</b> | 563.3794        | 1108.7249        | 554.8661        | 1107.7409       | 554.3741         | N    | <b>390.2096</b>  | 195.6084        | 373.1830       | 187.0951        | <b>372.1990</b>  | 186.6031         | 3  |
| 10 | <b>1226.7991</b> | 613.9032        | <b>1209.7726</b> | 605.8899        | 1208.7886       | 604.8979         | T    | <b>276.1666</b>  | 138.5870        | 259.1401       | 130.0737        | <b>258.1661</b>  | 129.5817         | 2  |
| 11 |                  |                 |                  |                 |                 |                  | R    | 175.1190         | 88.0631         | 158.0924       | 79.5498         |                  |                  | 1  |

MS/MS Fragmentation of **KSSAGGAKAGQPESR**Found in **P17098**, Zinc finger protein 8 OS=Homo sapiens GN=ZNF8 PE=1 SV=2

Match to Query 8060: 1559.821988 from(780.918270,2+) intensity(6126.0859)

Title: File440 Spectrum3286 scans: 4144

Data file \\192.168.1.104\public\raw data\Elite\_01\methylation\_ZW\SW620\2013-6-5-SW620-Kpropio-methyl-IP-Fr11-ZW.mgf

Click mouse within plot area to zoom in by factor of two about that point

Or,   to  Da Label all possible matches  Label matches used for scoring 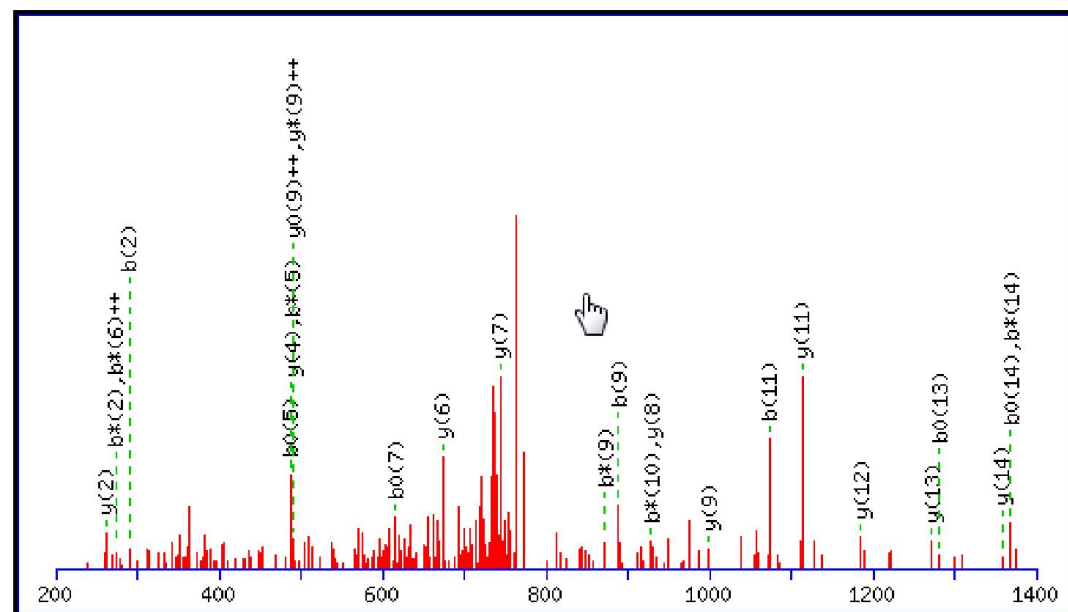Monoisotopic mass of neutral peptide **Mr(calc): 1559.8176**

Fixed modifications: Carbamidomethyl (C) (apply to specified residues or to all)

Variable modifications:

**K1** : Propionyl-(13CD3)Methyl (K)**K8** : Propionyl (K)

Ions Score: 45 Expect: 0.014

Matches : 25/164 fragment ions using 60 most intense peaks ([help](#))

| #  | b                | b <sup>++</sup> | b*               | b <sup>++</sup> | b <sup>0</sup>   | b <sup>0++</sup> | Seq. | y                | y <sup>++</sup> | y*        | y <sup>++</sup> | y <sup>0</sup> | y <sup>0++</sup> | #  |
|----|------------------|-----------------|------------------|-----------------|------------------|------------------|------|------------------|-----------------|-----------|-----------------|----------------|------------------|----|
| 1  | 203.1663         | 102.0868        | 186.1397         | 93.5735         |                  |                  | K    |                  |                 |           |                 |                |                  | 15 |
| 2  | <b>290.1983</b>  | 145.6028        | <b>273.1718</b>  | 137.0895        | 272.1878         | 136.5975         | S    | <b>1358.6659</b> | 679.3366        | 1341.6393 | 671.3233        | 1340.6553      | 670.8313         | 14 |
| 3  | 377.2303         | 189.1188        | 360.2038         | 180.6055        | 359.2198         | 180.1135         | S    | <b>1271.6339</b> | 636.3206        | 1254.6073 | 627.8073        | 1253.6233      | 627.3153         | 13 |
| 4  | 448.2675         | 224.6374        | 431.2409         | 216.1241        | 430.2569         | 215.6321         | A    | <b>1184.6018</b> | 592.3046        | 1167.5753 | 584.2913        | 1166.5913      | 583.7993         | 12 |
| 5  | 505.2889         | 253.1481        | <b>488.2624</b>  | 244.6348        | <b>487.2784</b>  | 244.1428         | G    | <b>1113.5647</b> | 557.2860        | 1096.5382 | 548.7727        | 1095.5541      | 548.2807         | 11 |
| 6  | 662.3104         | 331.6583        | 645.2838         | <b>323.1456</b> | 644.2998         | 322.6535         | C    | 1056.5432        | 523.7753        | 1039.5167 | 520.2620        | 1038.5327      | 519.7700         | 10 |
| 7  | 633.3475         | 317.1774        | 616.3210         | 308.6641        | <b>615.3369</b>  | 308.1721         | A    | <b>999.5218</b>  | 500.2645        | 982.4952  | <b>491.7513</b> | 981.5112       | <b>491.2592</b>  | 9  |
| 8  | 817.4687         | 409.2380        | 800.4421         | 400.7247        | 799.4581         | 400.2327         | K    | <b>928.4847</b>  | 464.7460        | 911.4581  | 456.2327        | 910.4741       | 455.7407         | 8  |
| 9  | <b>888.5058</b>  | 444.7565        | <b>871.4792</b>  | 436.2433        | 870.4952         | 435.7513         | A    | <b>744.3635</b>  | 372.6854        | 727.3369  | 364.1721        | 726.3529       | 363.6801         | 7  |
| 10 | 945.5273         | 473.2673        | <b>928.5007</b>  | 464.7540        | 927.5167         | 464.2620         | C    | <b>673.3264</b>  | 337.1668        | 656.2998  | 328.6536        | 655.3158       | 328.1615         | 6  |
| 11 | <b>1073.5858</b> | 537.2966        | 1056.5593        | 528.7833        | 1055.5753        | 528.2913         | Q    | 616.3049         | 308.6561        | 599.2784  | 300.1428        | 598.2944       | 299.6508         | 5  |
| 12 | 1170.6386        | 585.3229        | 1153.6121        | 577.3097        | 1152.6280        | 576.8177         | P    | <b>488.2463</b>  | 244.6268        | 471.2198  | 236.1135        | 470.2358       | 235.6215         | 4  |
| 13 | 1299.6812        | 650.3442        | 1282.6546        | 641.8310        | <b>1281.6706</b> | 641.3390         | E    | 391.1936         | 196.1094        | 374.1670  | 187.5872        | 373.1830       | 187.0951         | 3  |
| 14 | 1386.7132        | 693.3602        | <b>1369.6867</b> | 685.3470        | <b>1368.7027</b> | 684.8550         | S    | <b>262.1510</b>  | 131.5791        | 245.1244  | 123.0659        | 244.1404       | 122.5738         | 2  |
| 15 |                  |                 |                  |                 |                  |                  | R    | 175.1190         | 88.0631         | 158.0924  | 79.5498         |                |                  | 1  |

MS/MS Fragmentation of **THFKKSLDDGKVS**

Found in **F5H0L8**, SEC23-interacting protein OS=Homo sapiens GN=SEC23IP PE=2 SV=1

Match to Query 12640: 1802.979348 from(902.496950, 2+) intensity(32097.1836)

Title: File394 Spectrum10127 scans: 11437

Data file \\192.168.1.104\public\raw data\Elite\_01\methylation\_ZW\SW620\2013-5-16-620-Kpropio-methyl-IP-Fr8-ZW.mgf

Click mouse within plot area to zoom in by factor of two about that point

Or,   to  Da

Label all possible matches  Label matches used for scoring

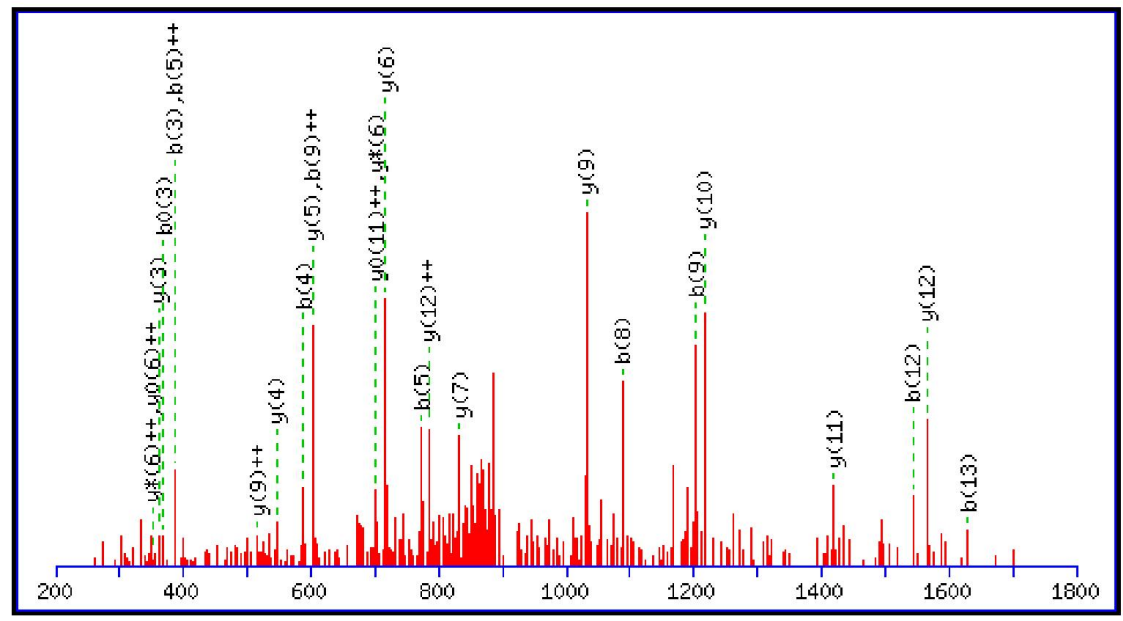

**Monoisotopic mass of neutral peptide Mr(calc): 1802.9799**

**Fixed modifications:** Carbamidomethyl (C) (apply to specified residues only)

**Variable modifications:**

**K4** : Propionyl-(13CD3)Methyl (K)

**K5** : Propionyl (K)

**K11** : Propionyl (K)

**Ions Score:** 45 **Expect:** 0.017

**Matches :** 25/148 fragment ions using 44 most intense peaks ([help](#))

| #  | b                | b <sup>++</sup> | b <sup>+</sup> | b <sup>+++</sup> | b <sup>0</sup>  | b <sup>0++</sup> | Seq.     | y                | y <sup>++</sup>  | y <sup>+</sup>  | y <sup>+++</sup> | y <sup>0</sup> | y <sup>0++</sup> | #               |    |
|----|------------------|-----------------|----------------|------------------|-----------------|------------------|----------|------------------|------------------|-----------------|------------------|----------------|------------------|-----------------|----|
| 1  | 102.0560         | 51.5311         |                |                  | 84.0444         | 42.5258          | T        |                  |                  |                 |                  |                |                  | 14              |    |
| 2  | 239.1139         | 120.0606        |                |                  | 221.1033        | 111.0553         | H        | 1702.9395        | 851.9734         | 1685.9130       | 843.4601         | 1684.9290      | 842.9621         | 13              |    |
| 3  | <b>386.1825</b>  | 193.5948        |                |                  | <b>368.1717</b> | 184.5895         | F        | <b>1565.8806</b> | <b>783.4439</b>  | 1548.8541       | 774.9307         | 1547.8701      | 774.4387         | 12              |    |
| 4  | <b>588.3415</b>  | 294.6743        |                | 571.3147         | 286.1610        | 570.3307         | 285.6690 | K                | <b>1418.8122</b> | 709.9097        | 1401.7857        | 701.9965       | 1400.8016        | <b>700.9045</b> | 11 |
| 5  | <b>772.4625</b>  | <b>386.7349</b> | 755.4359       | 378.2216         | 754.4519        | 377.7296         | K        | <b>1216.6532</b> | 608.8302         | 1199.6266       | 600.3170         | 1198.6426      | 599.8250         | 10              |    |
| 6  | 859.4945         | 430.2509        | 842.4680       | 421.7376         | 841.4839        | 421.2456         | S        | <b>1032.5320</b> | <b>516.7696</b>  | 1015.5055       | 508.2564         | 1014.5214      | 507.7644         | 9               |    |
| 7  | 972.5786         | 486.7929        | 955.5520       | 478.2796         | 954.5680        | 477.7876         | L        | 945.5000         | 473.2536         | 928.4734        | 464.7404         | 927.4894       | 464.2483         | 8               |    |
| 8  | <b>1087.6055</b> | 544.3064        | 1070.5790      | 535.7931         | 1069.5949       | 535.3011         | D        | <b>832.4159</b>  | 416.7116         | 815.3894        | 408.1983         | 814.4054       | 407.7063         | 7               |    |
| 9  | <b>1202.6325</b> | <b>601.8199</b> | 1185.6059      | 593.3066         | 1184.6219       | 592.8146         | D        | <b>717.3890</b>  | 359.1981         | <b>700.3624</b> | <b>350.6849</b>  | 699.3784       | <b>350.1928</b>  | 6               |    |
| 10 | 1259.6539        | 630.3306        | 1242.6274      | 621.8173         | 1241.6433       | 621.3253         | G        | <b>602.3620</b>  | 301.6847         | 585.3385        | 293.1714         | 584.3515       | 292.6794         | 5               |    |
| 11 | 1443.7761        | 722.3912        | 1426.7485      | 713.8779         | 1425.7645       | 713.3859         | K        | <b>545.3406</b>  | 273.1739         | 528.3140        | 264.6606         | 527.3300       | 264.1686         | 4               |    |
| 12 | <b>1542.8435</b> | 771.9254        | 1525.8170      | 763.4121         | 1524.8329       | 762.9201         | V        | <b>361.2194</b>  | 181.1133         | 344.1928        | 172.6001         | 343.2088       | 172.1081         | 3               |    |
| 13 | <b>1629.8755</b> | 815.4414        | 1612.8490      | 806.9281         | 1611.8660       | 806.4361         | S        | 262.1510         | 131.5791         | 245.1294        | 123.0659         | 244.1404       | 122.5738         | 2               |    |
| 14 |                  |                 |                |                  |                 |                  | R        | 175.1190         | 88.0631          | 158.0924        | 79.5498          |                |                  | 1               |    |

MS/MS Fragmentation of **DWYQKQGPGR**

Found in **P08727**, Keratin, type I cytoskeletal 19 OS=Homo sapiens GN=KRT19 PE=1 SV=4

Match to Query 8577: 1491.736548 from(746.875550, 2+) intensity(30655.0273)

Title: File392 Spectrum10177 scans: 11453

Data file \\192.168.1.104\public\raw data\Elite\_01\methylation\_ZW\SW620\2013-5-16-620-Kpropio-methyl-IP-Fr6-ZW.mgf

Click mouse within plot area to zoom in by factor of two about that point

Or,   to  Da

Label all possible matches  Label matches used for scoring

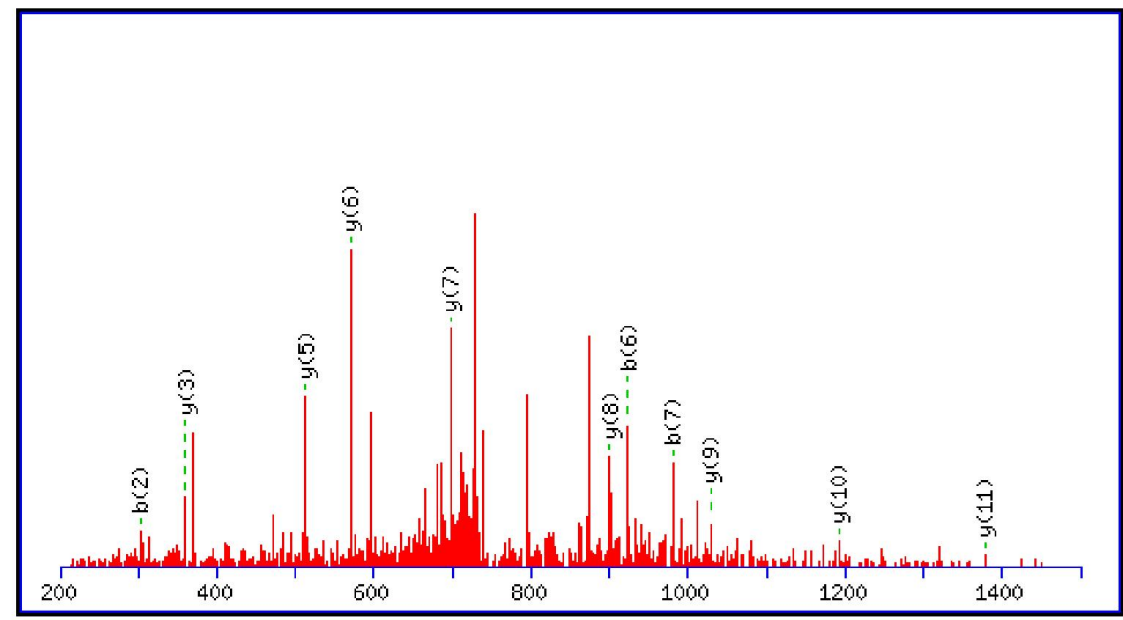

**Monoisotopic mass of neutral peptide Mr(calc): 1491.7379**

**Fixed modifications:** Carbamidomethyl (C) (apply to specified residues or termini only)

**Variable modifications:**

**K5** : Propionyl-(13CD3)Methyl (K)

**Ions Score: 45 Expect: 0.0096**

**Matches : 11/124 fragment ions using 26 most intense peaks** ([help](#))

| #  | b               | b <sup>++</sup> | b <sup>+</sup> | b <sup>++</sup> | b <sup>0</sup> | b <sup>0++</sup> | Seq. | y                | y <sup>++</sup> | y <sup>+</sup> | y <sup>++</sup> | y <sup>0</sup> | y <sup>0++</sup> | #  |
|----|-----------------|-----------------|----------------|-----------------|----------------|------------------|------|------------------|-----------------|----------------|-----------------|----------------|------------------|----|
| 1  | 116.0342        | 58.5207         |                |                 | 98.0237        | 49.5155          | D    |                  |                 |                |                 |                |                  | 12 |
| 2  | <b>302.1135</b> | 151.5604        |                |                 | 284.1030       | 142.5551         | W    | <b>1377.7182</b> | 689.3628        | 1360.6917      | 680.8495        | 1359.7077      | 680.3575         | 11 |
| 3  | 465.1769        | 233.0921        |                |                 | 447.1663       | 224.0868         | Y    | <b>1191.6389</b> | 596.3231        | 1174.6124      | 587.8098        | 1173.6284      | 587.3178         | 10 |
| 4  | 593.2354        | 297.1214        | 576.2089       | 288.6081        | 575.2249       | 288.1161         | Q    | <b>1028.5756</b> | 514.7914        | 1011.5491      | 506.2782        | 1010.5650      | 505.7862         | 9  |
| 5  | 795.3945        | 398.2009        | 778.3679       | 389.6876        | 777.3839       | 389.1956         | K    | <b>900.5170</b>  | 450.7622        | 883.4905       | 442.2489        | 882.5065       | 441.7569         | 8  |
| 6  | <b>923.4530</b> | 462.2302        | 906.4265       | 453.7169        | 905.4425       | 453.2349         | Q    | <b>698.3580</b>  | 349.6826        | 681.3315       | 341.1694        | 680.3474       | 340.6774         | 7  |
| 7  | <b>980.4745</b> | 490.7409        | 963.4479       | 482.2276        | 962.4639       | 481.7356         | G    | <b>570.2994</b>  | 285.6534        | 553.2729       | 277.1401        | 552.2889       | 276.6481         | 6  |
| 8  | 1077.5273       | 539.2673        | 1060.5007      | 530.7540        | 1059.5167      | 530.2620         | P    | <b>513.2780</b>  | 257.1426        | 496.2514       | 248.6293        | 495.2674       | 248.1373         | 5  |
| 9  | 1134.5487       | 567.7780        | 1117.5222      | 559.2647        | 1116.5382      | 558.7227         | G    | 416.2252         | 208.6162        | 399.1987       | 200.1030        | 398.2145       | 199.6110         | 4  |
| 10 | 1231.6015       | 616.3044        | 1214.5749      | 607.7911        | 1213.5909      | 607.2991         | P    | <b>359.2037</b>  | 180.1055        | 342.1772       | 171.5922        | 341.1932       | 171.1002         | 3  |
| 11 | 1318.6335       | 659.8204        | 1301.6070      | 651.3071        | 1300.6229      | 650.8151         | S    | 262.1510         | 131.5791        | 245.1244       | 123.0659        | 244.1404       | 122.5738         | 2  |
| 12 |                 |                 |                |                 |                |                  | R    | 175.1190         | 88.0631         | 158.0924       | 79.5498         |                |                  | 1  |



MS/MS Fragmentation of **KLAEQFPR**

Found in **E9PL10**, Transcription factor BTF3 homolog 4 OS=Homo sapiens GN=BTF3L4 PE=2 SV=1

Match to Query 2898: 1061.614348 from(531.814450, 2+) intensity(101693.7109)

Title: File394 Spectrum9278 scans: 10529

Data file \\192.168.1.104\public\raw data\Date\_01\methylation\_ZW\SW620\2013-5-16-620-Kpropio-methyl-IP-Fr8-ZW.mgf

Click mouse within plot area to zoom in by factor of two about that point

Or,   to  Da

Label all possible matches  Label matches used for scoring

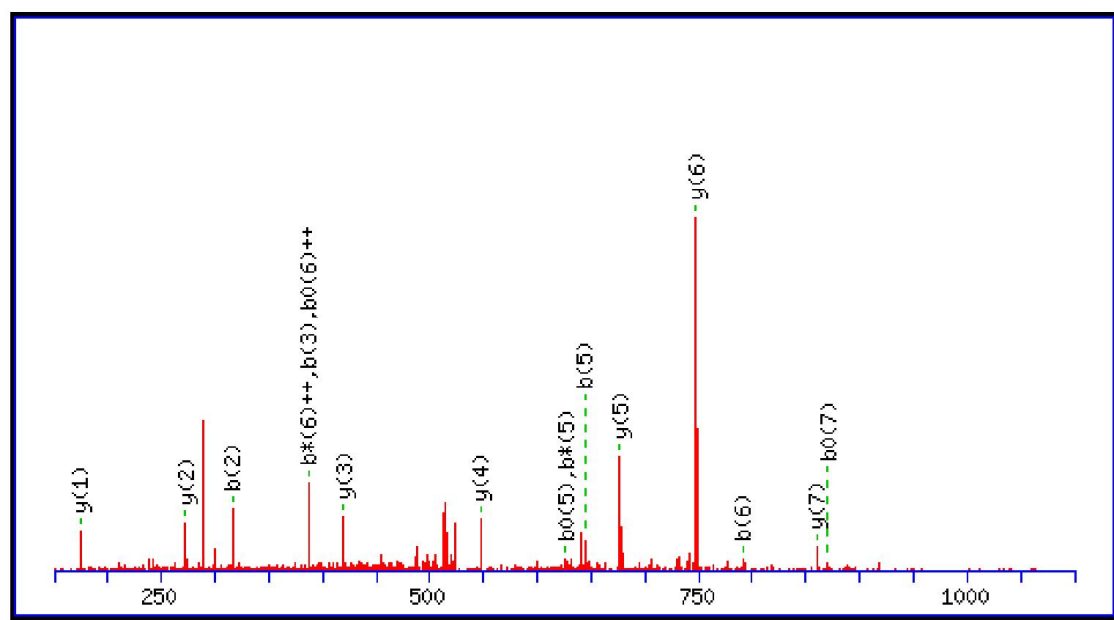

**Monoisotopic mass of neutral peptide Mr(calc):** 1061.6142

**Fixed modifications:** Carbamidomethyl (C) (apply to specified residues or termini only)

**Variable modifications:**

**K1** : Propionyl-(13C<sup>3</sup>)Methyl (K)

**Ions Score:** 45 **Expect:** 0.011

**Matches** : 16/70 fragment ions using 28 most intense peaks [\(help\)](#)

| # | b               | b <sup>++</sup> | b <sup>+</sup>  | b <sup>++</sup> | b <sup>0</sup>  | b <sup>0++</sup> | Seq. | y               | y <sup>++</sup> | y <sup>+</sup> | y <sup>++</sup> | y <sup>0</sup> | y <sup>0++</sup> | # |
|---|-----------------|-----------------|-----------------|-----------------|-----------------|------------------|------|-----------------|-----------------|----------------|-----------------|----------------|------------------|---|
| 1 | 203.1663        | 102.0868        | 186.1397        | 93.5735         |                 |                  | K    |                 |                 |                |                 |                |                  | 8 |
| 2 | <b>316.2504</b> | 158.6288        | 299.2238        | 150.1155        |                 |                  | L    | <b>860.4625</b> | 430.7349        | 843.4359       | 422.2216        | 842.4519       | 421.7296         | 7 |
| 3 | <b>387.2875</b> | 194.1474        | 370.2609        | 185.6341        |                 |                  | A    | <b>747.3784</b> | 374.1928        | 730.3519       | 365.6796        | 729.3679       | 365.1876         | 6 |
| 4 | 516.3301        | 258.6687        | 499.3035        | 250.1554        | 498.3195        | 249.6634         | E    | <b>676.3413</b> | 338.6743        | 659.3148       | 330.1610        | 658.3307       | 329.6690         | 5 |
| 5 | <b>644.3886</b> | 322.6980        | <b>627.3621</b> | 314.1847        | <b>626.3781</b> | 313.6927         | Q    | <b>547.2987</b> | 274.1530        | 530.2722       | 265.6397        |                |                  | 4 |
| 6 | <b>791.4571</b> | 396.2322        | 774.4305        | <b>387.7189</b> | 773.4465        | <b>387.2269</b>  | P    | <b>419.2401</b> | 210.1237        | 402.2136       | 201.6104        |                |                  | 3 |
| 7 | 888.5098        | 444.7585        | 871.4833        | 436.2453        | <b>870.4993</b> | 435.7533         | P    | <b>272.1717</b> | 136.5895        | 255.1452       | 128.0762        |                |                  | 2 |
| 8 |                 |                 |                 |                 |                 |                  | R    | <b>175.1190</b> | 88.0631         | 158.0924       | 79.5498         |                |                  | 1 |

Found in **E7EUYO**, DNA-dependent protein kinase catalytic subunit OS=Homo sapiens GN=PRKDC PE=2 SV=1

Match to Query 2738: 1044.620208 from(523.317380, 2+) intensity(29836.3086)

Title: File386 Spectrum4653 scans: 5491

Data file \\192.168.1.104\public\raw data\Elite01\methylation\_ZW\SW620\2013-5-16-620-Kpropio-methyl-IP-Fr14-ZW.mgf

Click mouse within plot area to zoom in by factor of two about that point

Or,   to  Da Label all possible matches  Label matches used for scoring 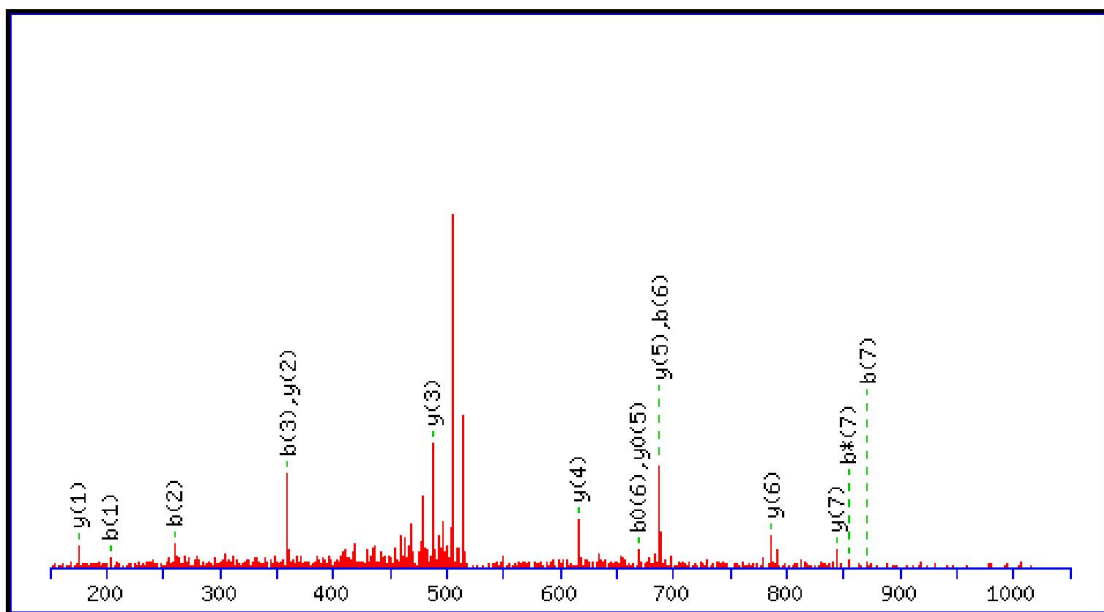Monoisotopic mass of neutral peptide  $M_r(\text{calc})$ : 1044.6200

Fixed modifications: Carbamidomethyl (C) (apply to specified residues or termini only)

Variable modifications:

**K1** : Propionyl-(13CD3)Methyl (K)**K7** : Propionyl (K)

Ions Score: 45 Expect: 0.009

Matches : 15/70 fragment ions using 27 most intense peaks ([help](#))

| # | b               | b <sup>++</sup> | b <sup>*</sup>  | b <sup>*++</sup> | b <sup>0</sup>  | b <sup>0++</sup> | Seq.     | y               | y <sup>++</sup> | y <sup>*</sup> | y <sup>*++</sup> | y <sup>0</sup>  | y <sup>0++</sup> | # |
|---|-----------------|-----------------|-----------------|------------------|-----------------|------------------|----------|-----------------|-----------------|----------------|------------------|-----------------|------------------|---|
| 1 | <b>203.1663</b> | 102.0868        | 186.1397        | 93.5735          |                 |                  | <b>K</b> |                 |                 |                |                  |                 |                  | 8 |
| 2 | <b>260.1878</b> | 130.5976        | 243.1612        | 122.0842         |                 |                  | <b>G</b> | <b>843.4683</b> | 422.2378        | 826.4417       | 413.7245         | 825.4577        | 413.2325         | 7 |
| 3 | <b>359.2562</b> | 180.1317        | 342.2296        | 171.6184         |                 |                  | <b>V</b> | <b>786.4468</b> | 393.7271        | 769.4203       | 385.2138         | 768.4363        | 384.7218         | 6 |
| 4 | 430.2933        | 215.6603        | 413.2667        | 207.1370         |                 |                  | <b>A</b> | <b>687.3784</b> | 344.1928        | 670.3519       | 335.6796         | <b>669.3679</b> | 335.1876         | 5 |
| 5 | 559.3359        | 280.1716        | 542.3093        | 271.6583         | 541.3253        | 271.1663         | <b>E</b> | <b>616.3413</b> | 308.6743        | 599.3148       | 300.1610         | 598.3307        | 299.6690         | 4 |
| 6 | <b>687.3945</b> | 344.2009        | 670.3679        | 335.6876         | <b>669.3839</b> | 335.1956         | <b>Q</b> | <b>487.2987</b> | 244.1530        | 470.2722       | 235.6397         |                 |                  | 3 |
| 7 | <b>871.5156</b> | 436.2615        | <b>854.4891</b> | 427.7482         | 853.5051        | 427.2562         | <b>K</b> | <b>359.2401</b> | 180.1237        | 342.2136       | 171.6104         |                 |                  | 2 |
| 8 |                 |                 |                 |                  |                 |                  | <b>R</b> | <b>175.1190</b> | 88.0631         | 158.0924       | 79.5498          |                 |                  | 1 |

Found in **Q13470**, Non-receptor tyrosine-protein kinase TNK1 OS=Homo sapiens GN=TNK1 PE=1 SV=3

Match to Query 7464: 1495.840428 from(748.927490,2+) intensity(77194.1563)

Title: File388 Spectrum12472 scans: 14095

Data file \\192.168.1.104\public\raw data\Elite\_01\methylation\_ZW\SW620\2013-5-16-620-Kpropio-methyl-IP-Fr16-ZW.mgf

Click mouse within plot area to zoom in by factor of two about that point

Or,   to  Da Label all possible matches  Label matches used for scoring 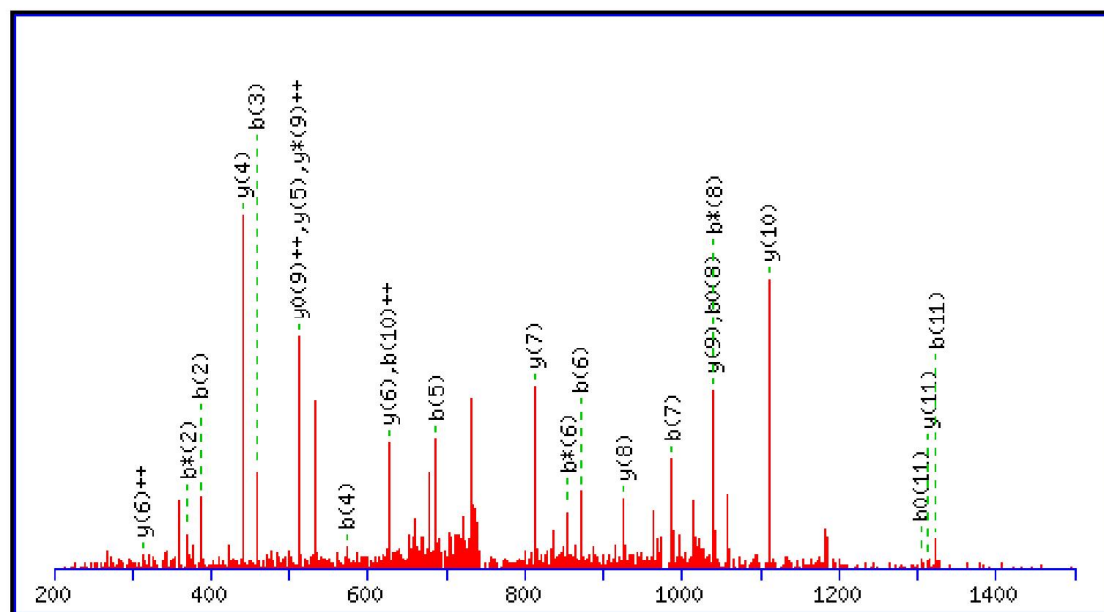**Monoisotopic mass of neutral peptide Mr(calc):** 1495.8419**Fixed modifications:** Carbamidomethyl (C) (apply to specified residues or [terminal only](#))**Variable modifications:****K1** : Propionyl (K)**K2** : Propionyl-(13CD3)Methyl (K)**Ions Score:** 45 **Expect:** 0.015**Matches** : 24/110 fragment ions using 39 most intense peaks ([help](#))

| #  | b                | b <sup>++</sup> | b <sup>+</sup>   | b <sup>++</sup> | b <sup>0</sup>   | b <sup>0++</sup> | Seq. | y                | y <sup>++</sup> | y <sup>+</sup> | y <sup>++</sup> | y <sup>0</sup> | y <sup>0++</sup> | #  |
|----|------------------|-----------------|------------------|-----------------|------------------|------------------|------|------------------|-----------------|----------------|-----------------|----------------|------------------|----|
| 1  | 185.1285         | 93.0679         | 168.1019         | 84.5546         |                  |                  | K    |                  |                 |                |                 |                |                  | 12 |
| 2  | <b>387.2875</b>  | 194.1474        | <b>370.2609</b>  | 185.6341        |                  |                  | K    | <b>1312.7281</b> | 656.8877        | 1295.7015      | 648.3544        | 1294.7175      | 647.8624         | 11 |
| 3  | <b>458.3246</b>  | 229.6659        | 441.2980         | 221.1527        |                  |                  | A    | <b>1110.5691</b> | 555.7882        | 1093.5425      | 547.2749        | 1092.5535      | 546.7829         | 10 |
| 4  | <b>572.3675</b>  | 286.6874        | 555.3410         | 278.1741        |                  |                  | N    | <b>1039.5390</b> | 520.2696        | 1022.5054      | <b>511.7563</b> | 1021.5214      | <b>511.2643</b>  | 9  |
| 5  | <b>685.4516</b>  | 343.2294        | 668.4250         | 334.7161        |                  |                  | L    | <b>925.4890</b>  | 463.2482        | 908.4625       | 454.7349        | 907.4785       | 454.2429         | 8  |
| 6  | <b>871.5309</b>  | 436.2691        | <b>854.5043</b>  | 427.7558        |                  |                  | W    | <b>812.4050</b>  | 406.7061        | 795.3794       | 398.1928        | 794.3944       | 397.7008         | 7  |
| 7  | <b>986.5578</b>  | 493.7826        | 969.5313         | 485.2693        | 968.5473         | 484.7773         | D    | <b>626.3257</b>  | <b>313.6665</b> | 609.2991       | 305.1532        | 608.3151       | 304.6612         | 6  |
| 8  | 1057.5949        | 529.3011        | <b>1040.5684</b> | 520.7878        | <b>1039.5844</b> | 520.2958         | A    | <b>511.2987</b>  | 256.1530        | 494.2722       | 247.6397        |                |                  | 5  |
| 9  | 1154.6477        | 577.8275        | 1137.6212        | 569.3142        | 1136.6371        | 568.8222         | P    | <b>440.2616</b>  | 220.6344        | 423.2350       | 212.1212        |                |                  | 4  |
| 10 | 1251.7005        | <b>626.3539</b> | 1234.6739        | 617.8406        | 1233.6899        | 617.3486         | L    | 343.2088         | 172.1081        | 326.1823       | 163.5948        |                |                  | 3  |
| 11 | <b>1322.7376</b> | 661.8724        | 1305.7110        | 653.3592        | <b>1304.7270</b> | 652.8671         | A    | 246.1561         | 123.5817        | 229.1295       | 115.0684        |                |                  | 2  |
| 12 |                  |                 |                  |                 |                  |                  | R    | 175.1190         | 88.0631         | 168.0924       | 79.5498         |                |                  | 1  |

MS/MS Fragmentation of **KASGAPAGAR**

Found in **E9PFK5**, Nucleolar protein 14 OS=Homo sapiens GN=NOP14 PE=2 SV=1

Match to Query 1394: 958.546428 from(480.280490, 2+) intensity(8626.3740)

Title: File440 Spectrum1496 scans: 2208

Data file \\192.168.1.104\public\raw data\Elite\_01\methylation\_ZW\SW620\2013-6-5-SW620-Kpropio-methyl-IP-Fr11-ZW.mgf

Click mouse within plot area to zoom in by factor of two about that point

Or,   to  Da

Label all possible matches  Label matches used for scoring

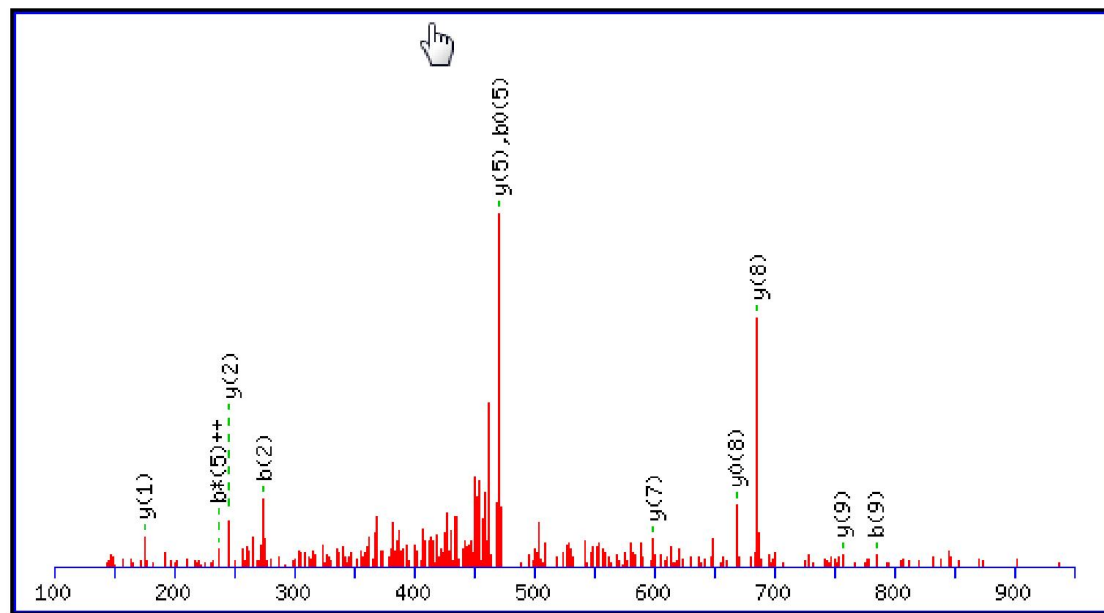

**Monoisotopic mass of neutral peptide Mr(calc): 958.5468**

**Fixed modifications:** Carbamidomethyl (C) (apply to specified residues or termini only)

**Variable modifications:**

**K1** : Propionyl-(13CD3)Methyl (K)

**Ions Score:** 45 **Expect:** 0.013

**Matches :** 11/90 fragment ions using 16 most intense peaks ([help](#))

| #  | b               | b <sup>++</sup> | b*       | b <sup>++</sup> * | b <sup>0</sup>  | b <sup>0++</sup> | Seq. | y               | y <sup>++</sup> | y*       | y <sup>++</sup> * | y <sup>0</sup>  | y <sup>0++</sup> | #  |
|----|-----------------|-----------------|----------|-------------------|-----------------|------------------|------|-----------------|-----------------|----------|-------------------|-----------------|------------------|----|
| 1  | 203.1663        | 102.0868        | 186.1397 | 93.5735           |                 |                  | K    |                 |                 |          |                   |                 |                  | 10 |
| 2  | <b>274.2034</b> | 137.6053        | 257.1769 | 129.0921          |                 |                  | A    | <b>757.3957</b> | 379.2012        | 740.3686 | 370.6879          | 739.3846        | 370.1959         | 9  |
| 3  | 361.2354        | 181.1214        | 344.2089 | 172.6081          | 343.2249        | 172.1161         | S    | <b>686.3580</b> | 343.6826        | 669.3315 | 335.1694          | <b>668.3474</b> | 334.6774         | 8  |
| 4  | 418.2569        | 209.6321        | 401.2303 | 201.1188          | 400.2463        | 200.6268         | G    | <b>599.3260</b> | 300.1666        | 582.2994 | 291.6534          |                 |                  | 7  |
| 5  | 489.2940        | 245.1506        | 472.2675 | <b>236.6374</b>   | <b>471.2834</b> | 236.1454         | A    | 542.3045        | 271.6559        | 525.2780 | 263.1426          |                 |                  | 6  |
| 6  | 586.3468        | 293.6770        | 569.3202 | 285.1638          | 568.3362        | 284.6717         | P    | <b>471.2674</b> | 236.1373        | 454.2409 | 227.6241          |                 |                  | 5  |
| 7  | 657.3839        | 329.1956        | 640.3573 | 320.6823          | 639.3733        | 320.1903         | A    | 374.2146        | 187.6110        | 357.1881 | 179.0977          |                 |                  | 4  |
| 8  | 714.4054        | 357.7063        | 697.3788 | 349.1930          | 696.3648        | 348.7010         | G    | 303.1775        | 152.0924        | 286.1510 | 143.5791          |                 |                  | 3  |
| 9  | <b>785.4425</b> | 393.2249        | 768.4159 | 384.7116          | 767.4319        | 384.2196         | A    | <b>246.1561</b> | 123.5817        | 229.1295 | 115.0684          |                 |                  | 2  |
| 10 |                 |                 |          |                   |                 |                  | R    | <b>175.1190</b> | 88.0631         | 158.0924 | 79.5498           |                 |                  | 1  |

MS/MS Fragmentation of **QFQFKAKR**

Found in **Q9NRF8**, CTP synthase 2 OS=Homo sapiens GN=CTPS2 PE=1 SV=1

Match to Query 3990: 1181.683328 from(591.848940, 2+) intensity(309332.5625)

Title: File386 Spectrum12040 scans: 13422

Data file \\192.168.1.104\public\raw data\Elite\_01\methylation\_ZW\SW620\2013-5-16-620-Kpropio-methyl-IP-Fr14-ZW.mgf

Click mouse within plot area to zoom in by factor of two about that point

Or,   to  Da

Label all possible matches  Label matches used for scoring

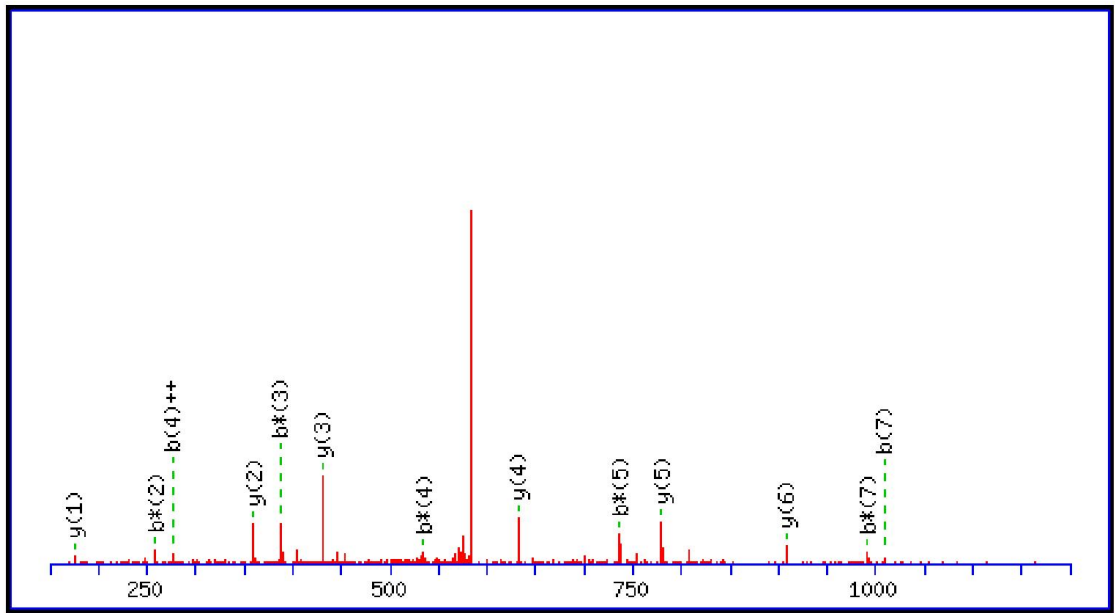

**Monoisotopic mass of neutral peptide Mr(calc):** 1181.6830

**Fixed modifications:** Carbamidomethyl (C) (apply to specified residues only)

**Variable modifications:**

**K5** : Propionyl-(13CD3)Methyl (K)

**K7** : Propionyl (K)

**Ions Score:** 44 **Expect:** 0.012

**Matches :** 14/56 fragment ions using 20 most intense peaks [\(help\)](#)

| # | b                | b <sup>++</sup> | b <sup>*</sup>  | b <sup>+++</sup> | Seq. | y               | y <sup>++</sup> | y <sup>*</sup> | y <sup>+++</sup> | # |
|---|------------------|-----------------|-----------------|------------------|------|-----------------|-----------------|----------------|------------------|---|
| 1 | 129.0659         | 65.0366         | 112.0393        | 56.5233          | Q    |                 |                 |                |                  | 8 |
| 2 | <b>276.1343</b>  | 138.5708        | <b>259.1077</b> | 130.0575         | F    | 1054.6317       | 527.8195        | 1037.6051      | 519.3062         | 7 |
| 3 | 404.1928         | 202.6001        | <b>387.1663</b> | 194.0868         | Q    | <b>907.5632</b> | 454.2853        | 890.5367       | 445.7720         | 6 |
| 4 | 551.2613         | <b>276.1343</b> | <b>534.2347</b> | 267.6210         | F    | <b>779.5047</b> | 390.2560        | 762.4781       | 381.7427         | 5 |
| 5 | 753.4203         | 377.2138        | <b>736.3937</b> | 368.7005         | K    | <b>632.4363</b> | 316.7218        | 615.4097       | 308.2085         | 4 |
| 6 | 824.4574         | 412.7323        | 807.4308        | 404.2191         | A    | <b>430.2772</b> | 215.6423        | 413.2507       | 207.1290         | 3 |
| 7 | <b>1008.5786</b> | 504.7929        | <b>991.5520</b> | 496.2796         | K    | <b>359.2401</b> | 180.1237        | 342.2136       | 171.6104         | 2 |
| 8 |                  |                 |                 |                  | R    | <b>175.1190</b> | 88.0631         | 158.0924       | 79.5498          | 1 |

MS/MS Fragmentation of **MLKTAVSEKMLKPTGR**

Found in **FZZ2C0**, Exosome complex exonuclease RRP44 OS=Homo sapiens GN=DIS3 PE=2 SV=1

Match to Query 14545: 1983.155868 from(992.585210, 2+) intensity(112453.6563)

Title: File652 Spectrum15184 scans: 16896

Data file \\192.168.1.104\public\raw data\Elite\_01\methylation\_ZW\SW620\2013-6-18-SW620-Kpropio-methyl-IP-Fr10-ZW.mgf

Click mouse within plot area to zoom in by factor of two about that point

Or,   to  Da

Label all possible matches  Label matches used for scoring

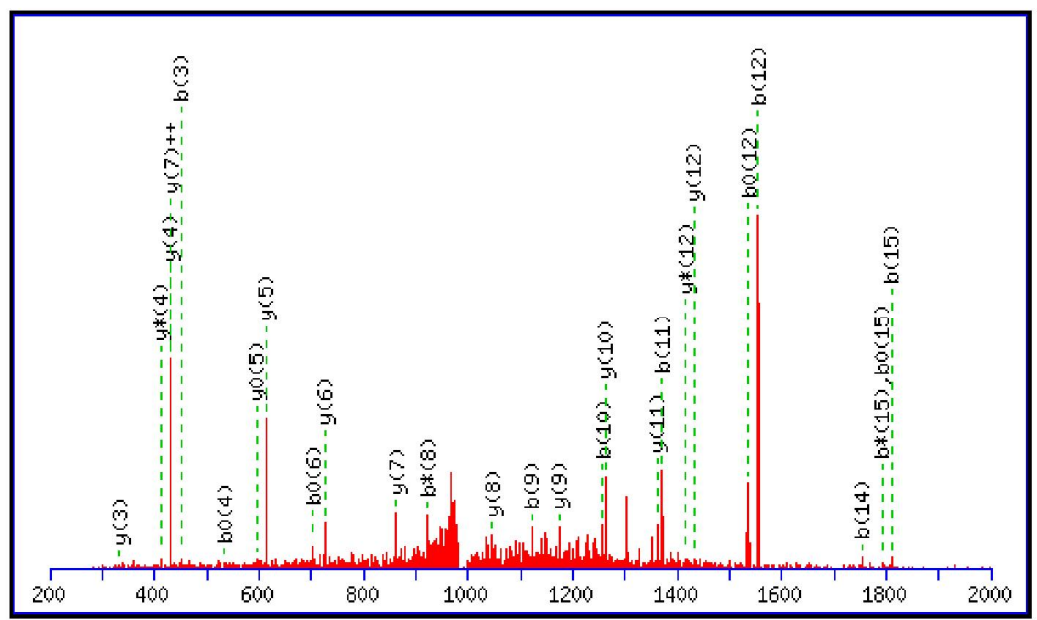

**Monoisotopic mass of neutral peptide Mr(calc):** 1983.1562

**Fixed modifications:** Carbamidomethyl (C) (apply to specified residues or termi

**Variable modifications:**

- M1** : Label:13C(1)2H(3) (M)
- K3** : Propionyl-(13CD3)Methyl (K)
- K9** : Propionyl (K)
- M10** : Label:13C(1)2H(3) (M)
- K12** : Propionyl (K)

**Ions Score:** 43 **Expect:** 0.016

**Matches** : 27/166 fragment ions using 67 most intense peaks [\(help\)](#)

| #  | b                | b <sup>++</sup> | b*               | b <sup>++</sup> | b <sup>0</sup>   | b <sup>0++</sup> | Seq.     | y                | y <sup>++</sup> | y*               | y <sup>++</sup> | y <sup>0</sup>  | y <sup>0++</sup> | #         |
|----|------------------|-----------------|------------------|-----------------|------------------|------------------|----------|------------------|-----------------|------------------|-----------------|-----------------|------------------|-----------|
| 1  | 136.0699         | 68.5386         |                  |                 |                  |                  | <b>I</b> |                  |                 |                  |                 |                 |                  | <b>16</b> |
| 2  | 249.1540         | 125.0806        |                  |                 |                  |                  | <b>L</b> | 1849.1009        | 925.0541        | 1832.0743        | 916.5408        | 1831.0903       | 916.0488         | <b>15</b> |
| 3  | <b>451.3130</b>  | 226.1601        | 434.2365         | 217.6469        |                  |                  | <b>K</b> | 1736.0168        | 868.5120        | 1718.9902        | 859.9988        | 1718.0062       | 859.5068         | <b>14</b> |
| 4  | 552.3607         | 276.6840        | 535.3342         | 268.1707        | <b>534.3501</b>  | 267.6787         | <b>T</b> | 1533.8578        | 767.4325        | 1516.8812        | 758.9193        | 1515.9472       | 758.4272         | <b>13</b> |
| 5  | 623.3978         | 312.2025        | 606.3713         | 303.6893        | 605.3873         | 303.1973         | <b>A</b> | <b>1432.8101</b> | 716.9087        | <b>1415.7835</b> | 708.3954        | 1414.7995       | 707.9034         | <b>12</b> |
| 6  | 722.4662         | 361.7368        | 705.4397         | 353.2235        | <b>704.4557</b>  | 352.7315         | <b>V</b> | <b>1361.7730</b> | 681.3901        | 1344.7464        | 672.8769        | 1343.7624       | 672.3843         | <b>11</b> |
| 7  | 809.4983         | 405.2528        | 792.4717         | 396.7395        | 791.4877         | 396.2475         | <b>S</b> | <b>1262.7046</b> | 631.8559        | 1245.6780        | 623.3426        | 1244.6940       | 622.8506         | <b>10</b> |
| 8  | 938.5409         | 469.7741        | <b>921.5143</b>  | 461.2608        | 920.5303         | 460.7688         | <b>E</b> | <b>1175.6725</b> | 588.3399        | 1158.6460        | 579.8266        | 1157.6620       | 579.3346         | <b>9</b>  |
| 9  | <b>1122.6620</b> | 561.8347        | 1105.6355        | 553.3214        | 1104.6515        | 552.8294         | <b>K</b> | <b>1046.6299</b> | 523.8186        | 1029.6034        | 515.3053        | 1028.6194       | 514.8133         | <b>8</b>  |
| 10 | <b>1257.7247</b> | 629.3660        | 1240.6982        | 620.8527        | 1239.7141        | 620.3607         | <b>I</b> | <b>862.5088</b>  | <b>431.7580</b> | 845.4822         | 423.2447        | 844.4982        | 422.7527         | <b>7</b>  |
| 11 | <b>1370.8089</b> | 685.9080        | 1353.7822        | 677.3947        | 1352.7982        | 676.9027         | <b>L</b> | <b>727.4461</b>  | 364.2267        | 710.4196         | 355.7134        | 709.4355        | 355.2214         | <b>6</b>  |
| 12 | <b>1554.9299</b> | 777.9686        | 1537.9034        | 769.4553        | <b>1536.9194</b> | 768.9633         | <b>K</b> | <b>614.3620</b>  | 307.6847        | 597.3355         | 299.1714        | <b>596.3515</b> | 298.6794         | <b>5</b>  |
| 13 | 1651.9827        | 826.4950        | 1634.9562        | 817.9817        | 1633.9721        | 817.4897         | <b>P</b> | <b>430.2409</b>  | 215.6241        | <b>413.2143</b>  | 207.1108        | 412.2303        | 206.6188         | <b>4</b>  |
| 14 | <b>1753.0304</b> | 877.0188        | 1736.0038        | 868.5056        | 1735.0198        | 868.0135         | <b>T</b> | <b>333.1881</b>  | 167.0977        | 316.1615         | 158.5844        | 315.1775        | 158.0924         | <b>3</b>  |
| 15 | <b>1810.0518</b> | 905.5296        | <b>1793.0253</b> | 897.0163        | <b>1792.0413</b> | 896.5243         | <b>G</b> | 232.1404         | 116.5738        | 215.1199         | 108.0606        |                 |                  | <b>2</b>  |
| 16 |                  |                 |                  |                 |                  |                  | <b>R</b> | 175.1190         | 88.0631         | 158.0924         | 79.5498         |                 |                  | <b>1</b>  |

MS/MS Fragmentation of **LALKTLKKVR**

Found in **Q2NL82**, Pre-rRNA-processing protein TSR1 homolog OS=Homo sapiens GN=TSR1 PE=1 SV=1

Match to Query 7124: 1441.952128 from(721.983340, 2+) intensity(105017.2422)

Title: File443j Spectrum15197 scans: 17009

Data file \\192.168.1.104\public\raw data\Elite\_01\methylation\_ZW\SW620\2013-6-6-SW620-Kpropio-methyl-IP-Fr15-ZW.mgf

Click mouse within plot area to zoom in by factor of two about that point

Or,   to  Da

Label all possible matches  Label matches used for scoring

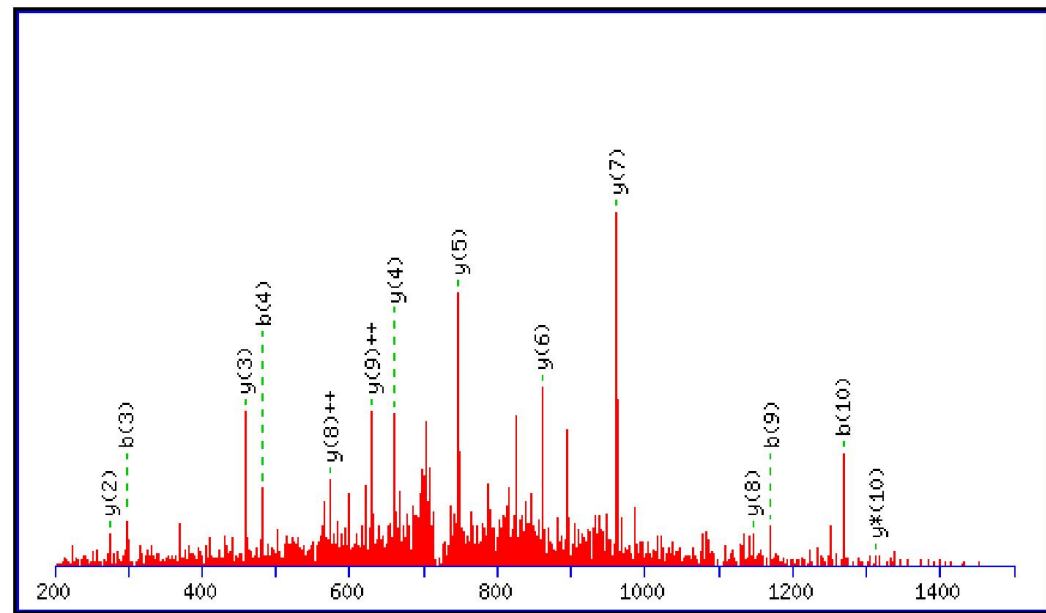

**Monoisotopic mass of neutral peptide Mr(calc):** 1441.9504

**Fixed modifications:** Carbamidomethyl (C) (apply to sp)

**Variable modifications:**  
**K4** : Propionyl (K)  
**K8** : Propionyl-(13CD3)Methyl (K)  
**K9** : Propionyl (K)

**Ions Score:** 43 **Expect:** 0.0015

**Matches :** 14/98 fragment ions using 26 most intense peaks

| #  | b         | b <sup>++</sup> | b <sup>+</sup> | b <sup>+++</sup> | b <sup>0</sup> | b <sup>0++</sup> | Seq. | y         | y <sup>++</sup> | y <sup>+</sup> | y <sup>+++</sup> | y <sup>0</sup> | y <sup>0++</sup> | #  |
|----|-----------|-----------------|----------------|------------------|----------------|------------------|------|-----------|-----------------|----------------|------------------|----------------|------------------|----|
| 1  | 114.0913  | 57.5493         |                |                  |                |                  | L    |           |                 |                |                  |                |                  | 11 |
| 2  | 185.1285  | 93.0679         |                |                  |                |                  | A    | 1329.8737 | 665.4405        | 1312.8471      | 656.9272         | 1311.8631      | 656.4352         | 10 |
| 3  | 298.2125  | 149.6099        |                |                  |                |                  | L    | 1258.8366 | 629.9219        | 1241.8100      | 621.4086         | 1240.8260      | 620.9166         | 9  |
| 4  | 482.3337  | 241.6705        | 465.3071       | 233.1572         |                |                  | K    | 1145.7525 | 573.3799        | 1128.7260      | 564.8666         | 1127.7419      | 564.3746         | 8  |
| 5  | 583.3814  | 292.1943        | 566.3548       | 283.6811         | 565.3708       | 283.1890         | T    | 961.6313  | 481.3193        | 944.6048       | 472.8060         | 943.6208       | 472.3140         | 7  |
| 6  | 696.4654  | 348.7364        | 679.4389       | 340.2231         | 678.4549       | 339.7311         | L    | 850.5836  | 430.7955        | 843.5571       | 422.2822         | 842.5731       | 421.7902         | 6  |
| 7  | 783.4975  | 392.2524        | 766.4709       | 383.7391         | 765.4869       | 383.2471         | S    | 747.4996  | 374.2534        | 730.4730       | 365.7402         | 729.4890       | 365.2481         | 5  |
| 8  | 985.6565  | 493.3319        | 968.6299       | 484.8186         | 967.6459       | 484.3266         | K    | 660.4676  | 330.7374        | 643.4410       | 322.2241         |                |                  | 4  |
| 9  | 1169.7777 | 585.3925        | 1152.7511      | 576.8792         | 1151.7671      | 576.3872         | K    | 458.3085  | 229.6579        | 441.2820       | 221.1446         |                |                  | 3  |
| 10 | 1268.8461 | 634.9267        | 1251.8195      | 626.4134         | 1250.8355      | 625.9214         | V    | 274.1874  | 137.5973        | 257.1608       | 129.0840         |                |                  | 2  |
| 11 |           |                 |                |                  |                |                  | R    | 175.1190  | 88.0631         | 158.0924       | 79.5498          |                |                  | 1  |

Found in **075420**, PERQ amino acid-rich with GYF domain-containing protein 1 OS=Homo sapiens GN=GIGYF1 PE=1 SV=2

Match to Query 1040: 917.556428 from(459.785490, 2+) intensity(12051.6621)

Title: File440 Spectrum7958 scans: 9163

Data file \\192.168.1.104\public\raw data\Elite\_01\methylation\_ZW\SW620\2013-6-5-SW620-Kpropio-methyl-IP-Fr11-ZW.mgf

Click mouse within plot area to zoom in by factor of two about that point

Or,   to  Da Label all possible matches  Label matches used for scoring 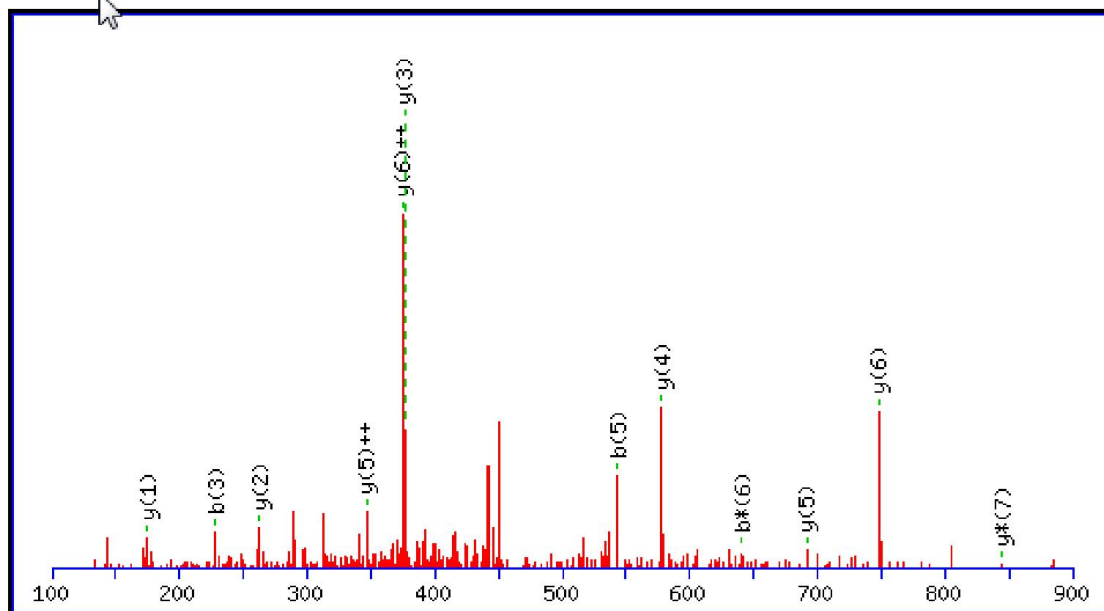**Monoisotopic mass of neutral peptide Mr(calc):** 917.5567**Fixed modifications:** Carbamidomethyl (C) (apply to specified residues or termini only)**Variable modifications:****K5** : Propionyl-(13CD3)Methyl (K)**Ions Score:** 42 **Expect:** 0.016**Matches** : 12/62 fragment ions using 24 most intense peaks ([help](#))

| # | b        | b <sup>++</sup> | b*       | b <sup>++</sup> * | b <sup>0</sup> | b <sup>0++</sup> | Seq. | y        | y <sup>++</sup> | y*       | y <sup>++</sup> * | y <sup>0</sup> | y <sup>0++</sup> | # |
|---|----------|-----------------|----------|-------------------|----------------|------------------|------|----------|-----------------|----------|-------------------|----------------|------------------|---|
| 1 | 58.0287  | 29.5180         |          |                   |                |                  | G    |          |                 |          |                   |                |                  | 8 |
| 2 | 171.1128 | 86.0600         |          |                   |                |                  | L    | 861.5425 | 431.2749        | 844.5160 | 422.7618          | 843.5319       | 422.2696         | 7 |
| 3 | 228.1343 | 114.5708        |          |                   |                |                  | G    | 748.4584 | 374.7329        | 731.4319 | 366.2196          | 730.4479       | 365.7276         | 6 |
| 4 | 341.2183 | 171.1128        |          |                   |                |                  | L    | 691.4370 | 346.2221        | 674.4104 | 337.7089          | 673.4264       | 337.2168         | 5 |
| 5 | 543.3173 | 272.1923        | 528.3508 | 263.6790          |                |                  | K    | 578.3529 | 289.6801        | 561.3264 | 281.1668          | 560.3424       | 280.6748         | 4 |
| 6 | 657.4203 | 329.2138        | 640.3937 | 320.7005          |                |                  | N    | 376.1939 | 188.6006        | 359.1674 | 180.0873          | 358.1833       | 179.5953         | 3 |
| 7 | 744.4523 | 372.7298        | 727.4258 | 364.2165          | 726.4417       | 363.7245         | S    | 262.1510 | 131.5791        | 245.1244 | 123.0659          | 244.1404       | 122.5738         | 2 |
| 8 |          |                 |          |                   |                |                  | R    | 175.1190 | 88.0631         | 158.0924 | 79.5498           |                |                  | 1 |



MS/MS Fragmentation of **TPLCAILKQKAPQQYR**Found in **A8MTK3**, POT1 protection of telomeres 1 homolog (S. pombe), isoform CRA\_a OS=Homo sapiens GN=POT1 PE=2 SV=1

Match to Query 14754: 2044.142308 from(1023.078430, 2+) intensity(112413.2500)

Title: File386 Spectrum16342 scans: 18040

Data file \\192.168.1.104\public\raw data\Elite\_01\methylation\_ZW\SW620\2013-5-16-620-Kpropio-methyl-IP-Fr14-ZW.mgf

Click mouse within plot area to zoom in by factor of two about that point

Or,   to  Da Label all possible matches  Label matches used for scoring 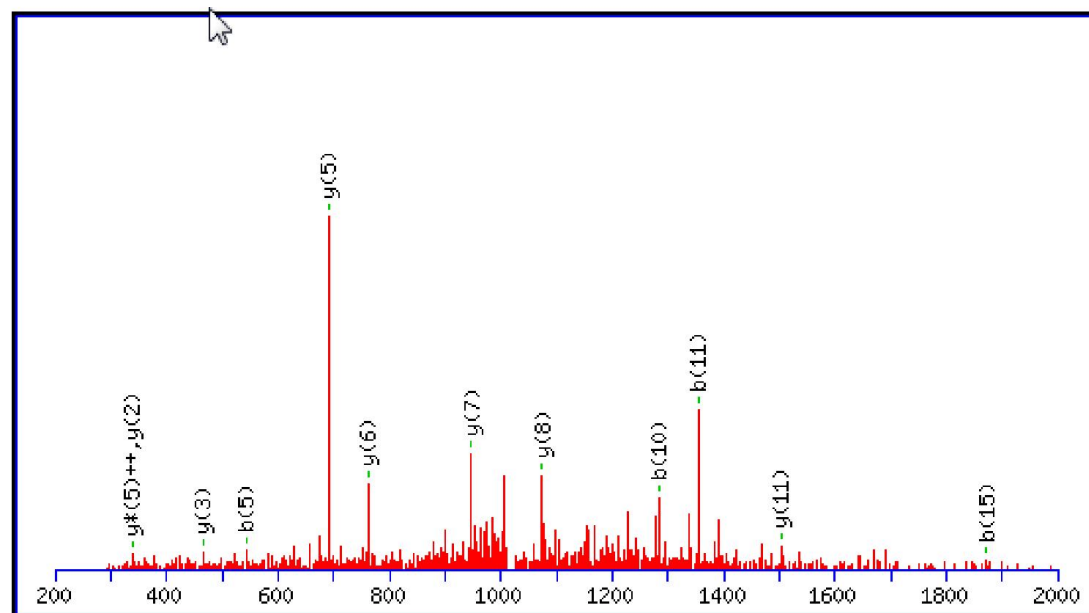**Monoisotopic mass of neutral peptide Mr(calc):** 2044.1412**Fixed modifications:** Carbamidomethyl (C) (apply to specified residues or t**Variable modifications:****K8** : Propionyl-(13CD3)Methyl (K)**K10** : Propionyl (K)**Ions Score:** 41 **Expect:** 0.045**Matches** : 12/136 fragment ions using 17 most intense peaks ([help](#))

| #  | b                | b <sup>++</sup> | b*        | b <sup>++</sup> | b <sup>0</sup> | b <sup>0++</sup> | Seq. | y                | y <sup>++</sup> | y*        | y <sup>++</sup> | #  |
|----|------------------|-----------------|-----------|-----------------|----------------|------------------|------|------------------|-----------------|-----------|-----------------|----|
| 1  | 102.0550         | 51.5311         |           |                 | 84.0444        | 42.5258          | T    |                  |                 |           |                 | 16 |
| 2  | 199.1077         | 100.0575        |           |                 | 181.0972       | 91.0522          | P    | 1944.1008        | 972.5540        | 1927.0743 | 964.0408        | 15 |
| 3  | 312.1918         | 156.5995        |           |                 | 294.1812       | 147.5942         | L    | 1847.0480        | 924.0277        | 1830.0215 | 915.5144        | 14 |
| 4  | 472.2224         | 236.6149        |           |                 | 454.2119       | 227.6096         | C    | 1733.9640        | 867.4856        | 1716.9374 | 858.9724        | 13 |
| 5  | <b>543.2595</b>  | 272.1334        |           |                 | 525.2490       | 263.1281         | A    | 1573.9333        | 787.4703        | 1556.9068 | 778.9570        | 12 |
| 6  | 658.3436         | 328.6754        |           |                 | 638.3330       | 319.6702         | I    | <b>1502.8962</b> | 751.9517        | 1485.8697 | 743.4385        | 11 |
| 7  | 769.4277         | 385.2175        |           |                 | 751.4171       | 376.2122         | L    | 1389.8121        | 695.4097        | 1372.7856 | 686.8964        | 10 |
| 8  | 971.5867         | 486.2970        | 954.5601  | 477.7837        | 953.5761       | 477.2917         | K    | 1276.7281        | 638.8677        | 1259.7015 | 630.3544        | 9  |
| 9  | 1099.6453        | 550.3263        | 1082.6137 | 541.8130        | 1081.6347      | 541.3210         | Q    | <b>1074.5691</b> | 537.7882        | 1057.5425 | 529.2749        | 8  |
| 10 | <b>1283.7664</b> | 642.3869        | 1266.7399 | 633.8736        | 1265.7559      | 633.3816         | K    | <b>946.5105</b>  | 473.7589        | 929.4839  | 465.2456        | 7  |
| 11 | <b>1354.8036</b> | 677.9054        | 1337.7770 | 669.3921        | 1336.7930      | 668.9001         | A    | <b>762.3893</b>  | 381.6983        | 745.3628  | 373.1850        | 6  |
| 12 | 1451.8563        | 726.4318        | 1434.8298 | 717.9185        | 1433.8458      | 717.4265         | P    | <b>691.3522</b>  | 346.1797        | 674.3257  | 337.6665        | 5  |
| 13 | 1579.9149        | 790.4611        | 1562.8884 | 781.9478        | 1561.9043      | 781.4558         | Q    | 594.2994         | 297.6534        | 577.2729  | 289.1401        | 4  |
| 14 | 1707.9735        | 854.4904        | 1690.9469 | 845.9771        | 1689.9629      | 845.4851         | Q    | <b>466.2409</b>  | 233.6241        | 449.2143  | 225.1108        | 3  |
| 15 | <b>1871.0368</b> | 936.0220        | 1854.0103 | 927.5088        | 1853.0262      | 927.0168         | Y    | <b>338.1823</b>  | 169.5948        | 321.1557  | 161.0815        | 2  |
| 16 |                  |                 |           |                 |                |                  | R    | 175.1190         | 88.0631         | 158.0924  | 79.5498         | 1  |

Found in **G3V1T4**, Nuclear pore complex protein Nup107 OS=Homo sapiens GN=NUP107 PE=2 SV=1

Match to Query 1550: 974.579748 from(488.297150, 2+) intensity(23531.1719)

Title: File440 Spectrum1870 scans: 2624

Data file \\192.168.1.104\public\raw data\Elite\_01\methylation\_ZW\SW620\2013-6-5-SW620-Kpropio-methyl-IP-Fr11-ZW.mgf

Click mouse within plot area to zoom in by factor of two about that point

Or,   to  Da Label all possible matches  Label matches used for scoring 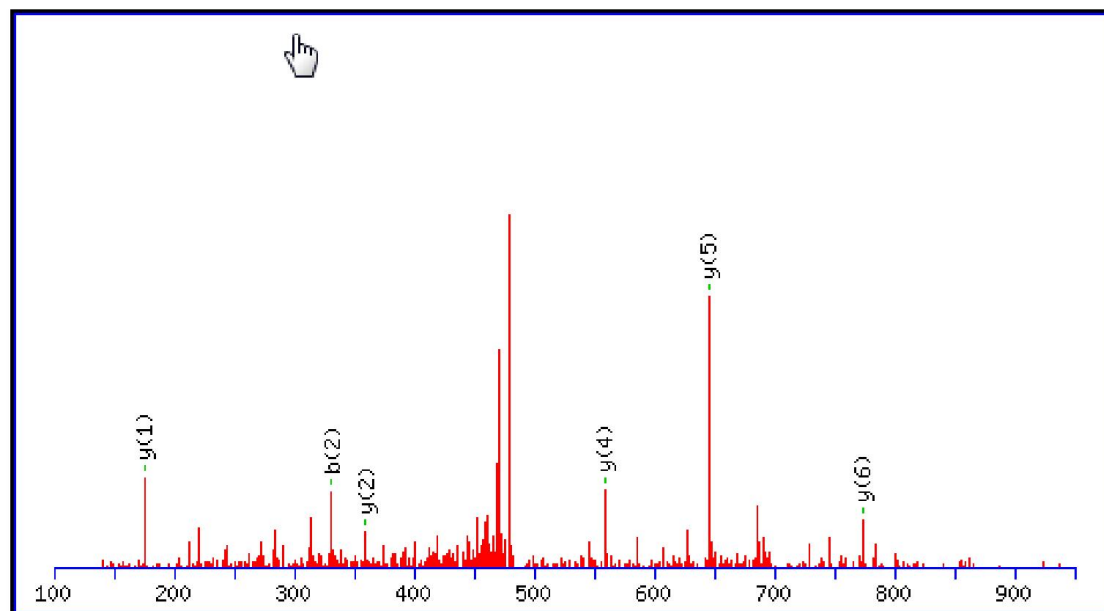**Monoisotopic mass of neutral peptide Mr(calc):** 974.5781**Fixed modifications:** Carbamidomethyl (C) (apply to specified residues or termini only)**Variable modifications:****K1** : Propionyl-(13CD3)Methyl (K)**K6** : Propionyl (K)**Ions Score:** 40 **Expect:** 0.026**Matches** : 6/60 fragment ions using 8 most intense peaks ([help](#))

| # | b               | b <sup>++</sup> | b <sup>+</sup> | b <sup>+++</sup> | b <sup>0</sup> | b <sup>0++</sup> | Seq. | y               | y <sup>++</sup> | y <sup>+</sup> | y <sup>+++</sup> | y <sup>0</sup> | y <sup>0++</sup> | # |
|---|-----------------|-----------------|----------------|------------------|----------------|------------------|------|-----------------|-----------------|----------------|------------------|----------------|------------------|---|
| 1 | 263.1663        | 102.0868        | 186.1397       | 93.5735          |                |                  | K    |                 |                 |                |                  |                |                  | 7 |
| 2 | <b>331.2249</b> | 166.1161        | 314.1983       | 157.6028         |                |                  | Q    | <b>773.4264</b> | 387.2169        | 756.3999       | 378.7036         | 755.4159       | 378.2116         | 6 |
| 3 | 418.2569        | 209.6321        | 401.2303       | 201.1188         | 400.2463       | 200.6268         | S    | <b>645.3679</b> | 323.1876        | 628.3413       | 314.6743         | 627.3573       | 314.1823         | 5 |
| 4 | 489.2940        | 245.1506        | 472.2675       | 236.6374         | 471.2834       | 236.1454         | A    | <b>558.3358</b> | 279.6715        | 541.3093       | 271.1583         |                |                  | 4 |
| 5 | 617.3526        | 309.1799        | 600.3260       | 300.6667         | 599.3420       | 300.1746         | Q    | 487.2987        | 244.1530        | 470.2722       | 235.6397         |                |                  | 3 |
| 6 | 801.4738        | 401.2405        | 784.4472       | 392.7272         | 783.4632       | 392.2352         | K    | <b>359.2401</b> | 180.1237        | 342.2136       | 171.6104         |                |                  | 2 |
| 7 |                 |                 |                |                  |                |                  | R    | <b>175.1190</b> | 88.0631         | 168.0924       | 79.5498          |                |                  | 1 |

MS/MS Fragmentation of **AAVKTLNPKAEVAR**

Found in **P40227**, T-complex protein 1 subunit zeta OS=Homo sapiens GN=CCT6A PE=1 SV=3

Match to Query 8805: 1638.958968 from(820.486760, 2+) intensity(42681.8750)

Title: File386 Spectrum15176 scans: 16768

Data file \\192.168.1.104\public\raw data\Elite\_01\methylation\_ZW\SW620\2013-5-16-620-Kpropio-methyl-IP-Fr14-ZW.mgf

Click mouse within plot area to zoom in by factor of two about that point

Or,   to  Da

Label all possible matches  Label matches used for scoring

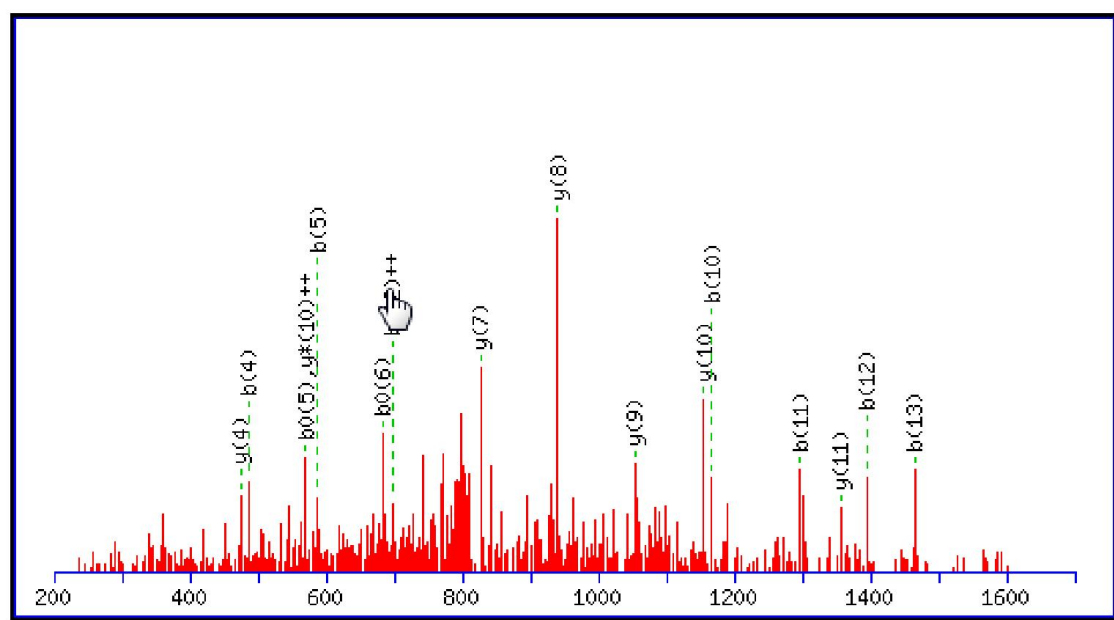

**Monoisotopic mass of neutral peptide Mr(calc): 1638.9577**

**Fixed modifications:** Carbamidomethyl (C) (apply to specified residues or

**Variable modifications:**

**N-term :** Acetyl (Protein N-term)

**K4 :** Propionyl-(13CD3)Methyl (K)

**K9 :** Propionyl (K)

**Ions Score:** 38 **Expect:** 0.06

**Matches :** 16/136 fragment ions using 28 most intense peaks [\(help\)](#)

| #  | b                | b <sup>++</sup> | b <sup>+</sup> | b <sup>+++</sup> | b <sup>0</sup>  | b <sup>0++</sup> | Seq. | y                | y <sup>++</sup> | y <sup>+</sup> | y <sup>+++</sup> | y <sup>0</sup> | y <sup>0++</sup> | #  |
|----|------------------|-----------------|----------------|------------------|-----------------|------------------|------|------------------|-----------------|----------------|------------------|----------------|------------------|----|
| 1  | 114.0550         | 57.5311         |                |                  |                 |                  | A    |                  |                 |                |                  |                |                  | 14 |
| 2  | 185.0921         | 93.0497         |                |                  |                 |                  | A    | 1526.9173        | 763.9623        | 1509.8908      | 755.4490         | 1508.9068      | 754.9570         | 13 |
| 3  | 284.1605         | 142.5839        |                |                  |                 |                  | V    | 1455.8802        | 728.4438        | 1438.8537      | 719.9305         | 1437.8697      | 719.4385         | 12 |
| 4  | <b>486.3195</b>  | 243.6634        | 469.2929       | 235.1501         |                 |                  | K    | <b>1356.8118</b> | 678.9095        | 1339.7853      | 670.3963         | 1338.8012      | 669.9043         | 11 |
| 5  | <b>587.3672</b>  | 294.1872        | 570.3406       | 285.6740         | <b>569.3566</b> | 285.1819         | T    | <b>1154.6529</b> | 577.8300        | 1137.6263      | <b>569.3168</b>  | 1136.6422      | 568.8248         | 10 |
| 6  | 700.4512         | 350.7293        | 683.4247       | 342.2160         | <b>682.4407</b> | 341.7240         | L    | <b>1053.6051</b> | 527.3062        | 1036.5786      | 518.7929         | 1035.5946      | 518.3009         | 9  |
| 7  | 814.4942         | 407.7507        | 797.4676       | 399.2374         | 796.4836        | 398.7454         | N    | <b>940.5211</b>  | 470.7642        | 923.4945       | 462.2509         | 922.5105       | 461.7589         | 8  |
| 8  | 911.5469         | 456.2771        | 894.5204       | 447.7638         | 893.5364        | 447.2718         | P    | <b>826.4781</b>  | 413.7427        | 809.4516       | 405.2294         | 808.4676       | 404.7374         | 7  |
| 9  | 1095.6681        | 548.3377        | 1078.6416      | 539.8244         | 1077.6575       | 539.3224         | K    | 729.4254         | 365.2163        | 712.3988       | 356.7030         | 711.4148       | 356.2110         | 6  |
| 10 | <b>1166.7052</b> | 583.8562        | 1149.6787      | 575.3430         | 1148.6947       | 574.8510         | A    | 645.3042         | 273.1557        | 628.2776       | 264.6425         | 627.2936       | 264.1504         | 5  |
| 11 | <b>1295.7478</b> | 648.3775        | 1278.7213      | 639.8643         | 1277.7372       | 639.3723         | K    | <b>474.2671</b>  | 237.6372        | 457.2405       | 229.1239         | 456.2565       | 228.6319         | 4  |
| 12 | <b>1394.8162</b> | 697.9118        | 1377.7897      | 689.3985         | 1376.8057       | 688.9065         | V    | 345.2245         | 173.1159        | 328.1979       | 164.6028         |                |                  | 3  |
| 13 | <b>1465.8533</b> | 733.4303        | 1448.8268      | 724.9170         | 1447.8428       | 724.4250         | A    | 246.1561         | 123.5817        | 229.1295       | 115.0684         |                |                  | 2  |
| 14 |                  |                 |                |                  |                 |                  | R    | 175.1190         | 88.0631         | 158.0924       | 79.5498          |                |                  | 1  |

Found in **095750**, Fibroblast growth factor 19 OS=Homo sapiens GN=FGF19 PE=1 SV=1

Match to Query 4430: 1239.754728 from(620.884640, 2+) intensity(133018.7813)

Title: File654 Spectrum11311 scans: 12907

Data file \\192.168.1.104\public\raw data\Elite\_01\methylation\_ZW\SW620\2013-6-18-SW620-Kpropio-methyl-IP-Fr4-ZW.mgf

Click mouse within plot area to zoom in by factor of two about that point

Or,   to  Da Label all possible matches  Label matches used for scoring 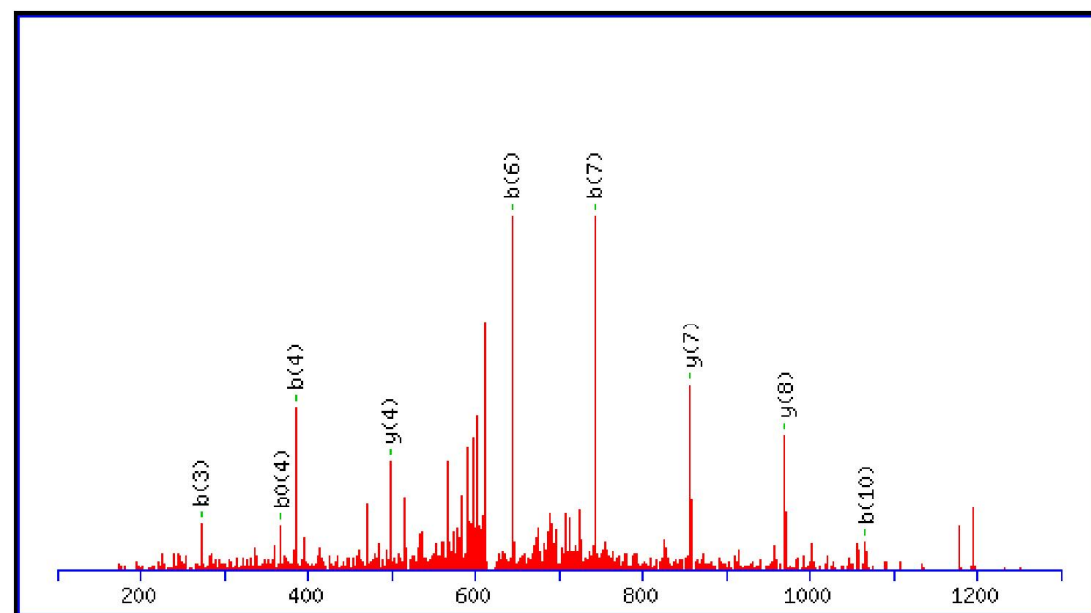**Monoisotopic mass of neutral peptide Mr(calc):** 1239.7572**Fixed modifications:** Carbamidomethyl (C) (apply to specified residues or termini only)**Variable modifications:****K5** : Propionyl-(13CD3)Methyl (K)**Ions Score:** 37 **Expect:** 0.043**Matches** : 9/108 fragment ions using 11 most intense peaks ([help](#))

| #  | b                | b <sup>++</sup> | b <sup>+</sup> | b <sup>+++</sup> | b <sup>0</sup>  | b <sup>0++</sup> | Seq. | y               | y <sup>++</sup> | y <sup>+</sup> | y <sup>+++</sup> | y <sup>0</sup> | y <sup>0++</sup> | #  |
|----|------------------|-----------------|----------------|------------------|-----------------|------------------|------|-----------------|-----------------|----------------|------------------|----------------|------------------|----|
| 1  | 102.0550         | 51.5311         |                |                  | 84.0444         | 42.5258          | T    |                 |                 |                |                  |                |                  | 11 |
| 2  | 201.1234         | 101.0653        |                |                  | 183.1128        | 92.0600          | V    | 1139.7168       | 570.3520        | 1122.6902      | 561.8488         | 1121.7062      | 561.3567         | 10 |
| 3  | <b>272.1605</b>  | 136.5839        |                |                  | 254.1499        | 127.5786         | A    | 1040.6484       | 520.3278        | 1023.6218      | 512.3146         | 1022.6378      | 511.8225         | 9  |
| 4  | <b>385.2445</b>  | 193.1259        |                |                  | <b>367.2340</b> | 184.1206         | I    | <b>969.6113</b> | 485.3093        | 952.5847       | 476.7960         | 951.6007       | 476.3040         | 8  |
| 5  | 587.4038         | 294.2054        | 570.3770       | 285.6921         | 569.3930        | 285.2001         | K    | <b>856.5272</b> | 428.7672        | 839.5006       | 420.2540         | 838.5166       | 419.7820         | 7  |
| 6  | <b>644.4250</b>  | 322.7162        | 627.3985       | 314.2029         | 626.4145        | 313.7109         | G    | 654.3682        | 327.6877        | 637.3416       | 319.1745         | 636.3576       | 318.6824         | 6  |
| 7  | <b>743.4934</b>  | 372.2504        | 726.4669       | 363.7371         | 725.4829        | 363.2451         | V    | 597.3467        | 299.1770        | 580.3202       | 290.6637         | 579.3362       | 290.1717         | 5  |
| 8  | 880.5523         | 440.7798        | 863.5258       | 432.2665         | 862.5418        | 431.7745         | H    | <b>498.2783</b> | 249.6428        | 481.2518       | 241.1295         | 480.2677       | 240.6375         | 4  |
| 9  | 967.5844         | 484.2958        | 950.5578       | 475.7826         | 949.5738        | 475.2905         | S    | 361.2194        | 181.1135        | 344.1928       | 172.6001         | 343.2088       | 172.1081         | 3  |
| 10 | <b>1066.6528</b> | 533.8300        | 1049.6262      | 525.3168         | 1048.6422       | 524.8248         | V    | 274.1874        | 137.5973        | 257.1608       | 129.0840         |                |                  | 2  |
| 11 |                  |                 |                |                  |                 |                  | R    | 175.1190        | 88.0631         | 158.0924       | 79.5498          |                |                  | 1  |

MS/MS Fragmentation of **DRLVPLKNR**Found in **H7C602**, T-lymphoma invasion and metastasis-inducing protein 2 OS=Homo sapiens GN=TIAM2 PE=2 SW=1

Match to Query 3972: 1183.727748 from(592.871150, 2+) intensity(15340.2852)

Title: File649 Spectrum11051 scans: 12311

Data file \\192.168.1.104\public\raw data\Elite\_01\methylation\_ZW\SW620\2013-6-18-SW620-Kpropio-methyl-IP-Fr20-ZW.mgf

Click mouse within plot area to zoom in by factor of two about that point

Or,   to  Da Label all possible matches  Label matches used for scoring 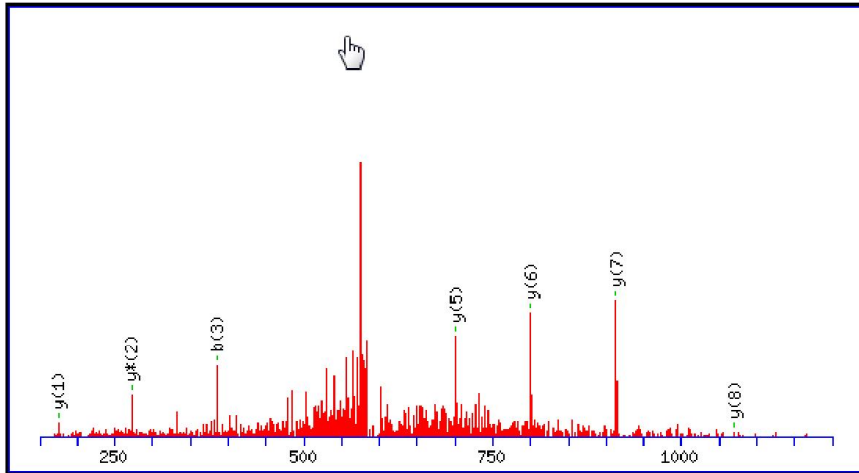**Monoisotopic mass of neutral peptide Mr(calc):** 1183.7310**Fixed modifications:** Carbamidomethyl (C) (apply to specified residues or termini only)**Variable modifications:****K7** : Propionyl-(13CD3)Methyl (K)**Ions Score:** 37 **Expect:** 0.042**Matches** : 8/78 fragment ions using 10 most intense peaks ([help](#))

| # | b               | b <sup>++</sup> | b <sup>+</sup> | b <sup>+</sup> + | b <sup>0</sup> | b <sup>0</sup> + | Seq. | y                | y <sup>++</sup> | y <sup>+</sup>  | y <sup>+</sup> + | # |
|---|-----------------|-----------------|----------------|------------------|----------------|------------------|------|------------------|-----------------|-----------------|------------------|---|
| 1 | 116.0342        | 58.5207         |                |                  | 98.0237        | 49.5155          | D    |                  |                 |                 |                  | 9 |
| 2 | <b>272.1353</b> | 136.5713        | 255.1088       | 128.0580         | 254.1248       | 127.5660         | R    | <b>1069.7113</b> | 535.3593        | 1052.6848       | 526.8460         | 8 |
| 3 | <b>385.2194</b> | 193.1133        | 368.1928       | 184.6001         | 367.2088       | 184.1081         | L    | <b>913.6102</b>  | 457.3087        | 896.5836        | 448.7955         | 7 |
| 4 | 484.2878        | 242.6475        | 467.2613       | 234.1343         | 466.2772       | 233.6423         | V    | <b>800.5261</b>  | 400.7667        | 783.4996        | 392.2534         | 6 |
| 5 | 581.3406        | 291.1739        | 564.3140       | 282.6606         | 563.3300       | 282.1686         | P    | <b>701.4577</b>  | 351.2325        | 684.4312        | 342.1928         | 5 |
| 6 | 694.4246        | 347.7160        | 677.3981       | 339.2027         | 676.4141       | 338.7107         | L    | 604.4050         | 302.7061        | 587.3784        | 294.1928         | 4 |
| 7 | 896.5836        | 448.7955        | 879.5571       | 440.2822         | 878.5731       | 439.7902         | K    | 491.3209         | 246.1641        | 474.2943        | 237.6508         | 3 |
| 8 | 1010.6266       | 505.8169        | 993.6000       | 497.3037         | 992.6160       | 496.8116         | N    | 289.1619         | 145.0846        | <b>272.1353</b> | 136.5713         | 2 |
| 9 |                 |                 |                |                  |                |                  | R    | <b>175.1190</b>  | 88.0631         | 158.0924        | 79.5498          | 1 |

MS/MS Fragmentation of **VKEQFR**Found in **014802**, DNA-directed RNA polymerase III subunit RPC1 OS=Homo sapiens GN=POLR3A PE=1 SV=2

Match to Query 1533: 935.534088 from(468.774320, 2+) intensity(22065.8086)

Title: File448 Spectrum12546 scans: 14308

Data file \\192.168.1.104\public\raw data\Elite\_01\methylation\_ZW\SW620\2013-6-6-SW620-Kpropio-methyl-IP-Fr7-ZW.mgf

Click mouse within plot area to zoom in by factor of two about that point

Or,   to  Da Label all possible matches  Label matches used for scoring 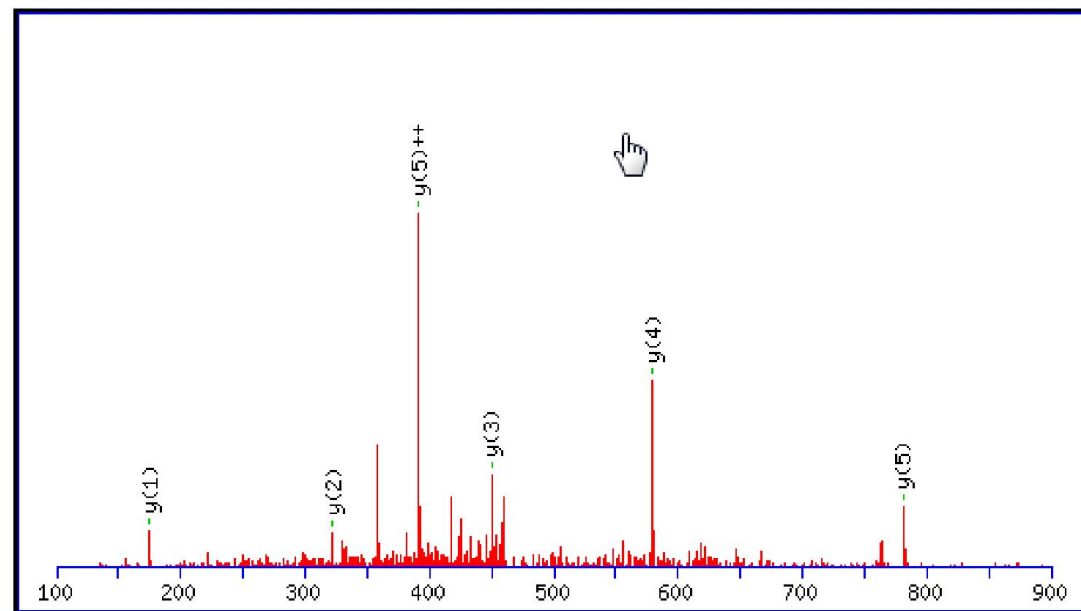**Monoisotopic mass of neutral peptide Mr(calc):** 935.5349**Fixed modifications:** Carbamidomethyl (C) (apply to specified residues or termini only)**Variable modifications:****N-term :** Propionyl (protein N-term) (Protein N-term)**K2 :** Propionyl-(13CD3)Methyl (K)**Ions Score:** 37 **Expect:** 0.066**Matches :** 6/48 fragment ions using 8 most intense peaks ([help](#))

| # | b        | b <sup>++</sup> | b <sup>+</sup> | b <sup>+++</sup> | b <sup>0</sup> | b <sup>0++</sup> | Seq. | y               | y <sup>++</sup> | y <sup>+</sup> | y <sup>+++</sup> | y <sup>0</sup> | y <sup>0++</sup> | # |
|---|----------|-----------------|----------------|------------------|----------------|------------------|------|-----------------|-----------------|----------------|------------------|----------------|------------------|---|
| 1 | 136.1019 | 78.5546         |                |                  |                |                  | V    |                 |                 |                |                  |                |                  | 6 |
| 2 | 358.2609 | 179.6341        | 341.2344       | 171.1208         |                |                  | K    | <b>781.4476</b> | <b>391.2274</b> | 764.4210       | 382.7141         | 763.4370       | 382.2221         | 5 |
| 3 | 487.3035 | 244.1554        | 470.2770       | 235.6421         | 469.2929       | 235.1501         | K    | <b>579.2885</b> | 290.1479        | 562.2620       | 281.6346         | 561.2780       | 281.1426         | 4 |
| 4 | 615.3621 | 308.1847        | 598.3355       | 299.6714         | 597.3515       | 299.1794         | Q    | <b>450.2459</b> | 225.6266        | 433.2194       | 217.1133         |                |                  | 3 |
| 5 | 762.4305 | 381.7189        | 745.4040       | 373.2056         | 744.4199       | 372.7136         | F    | <b>322.1874</b> | 161.5973        | 305.1608       | 153.0840         |                |                  | 2 |
| 6 |          |                 |                |                  |                |                  | R    | <b>175.1190</b> | 88.0631         | 158.0924       | 79.5498          |                |                  | 1 |

MS/MS Fragmentation of **IPNFKGASHAAEQLPR**Found in **Q2M296-3**, Isoform 3 of Methenyltetrahydrofolate synthase domain-containing protein OS=Homo sapiens GN=MTHFS

Match to Query 12153: 1808.978172 from(604.000000,3+) intensity(38576.3711)

Title: File658 Spectrum8433 scans: 9706

Data file \\192.168.1.104\public\raw data\Elite\_01\methylation\_ZW\SW620\2013-6-18-SW620-Kpropio-methyl-IP-Fr17-ZW.mgf

Click mouse within plot area to zoom in by factor of two about that point

Or,   to  Da Label all possible matches  Label matches used for scoring 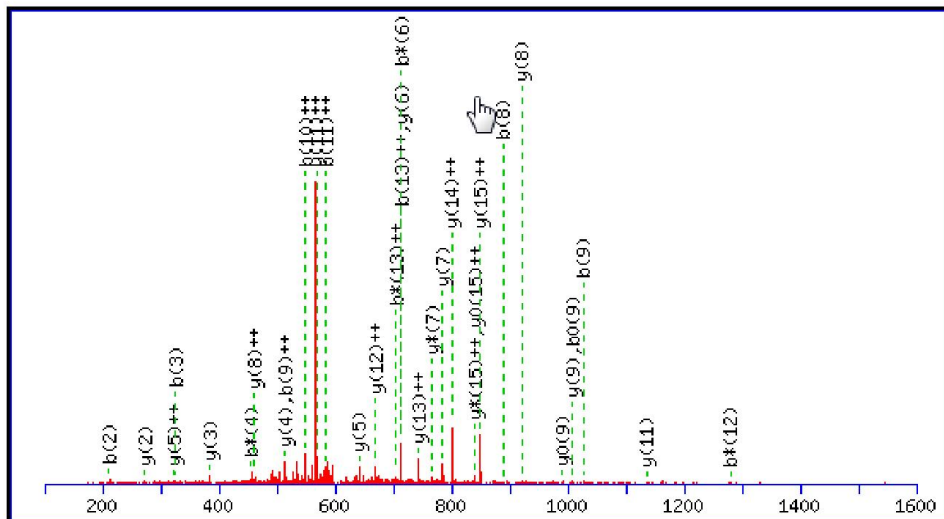**Monoisotopic mass of neutral peptide  $M_r(\text{calc})$ :** 1808.9806**Fixed modifications:** Carbamidomethyl (C) (apply to specified residues or termini only)**Variable modifications:****K5** : Propionyl-(13CD3)Methyl (K)**Ions Score:** 37 **Expect:** 0.13**Matches** : 33/154 fragment ions using 72 most intense peaks ([help](#))

| #  | b                | b <sup>++</sup> | b*               | b <sup>+++</sup> | b <sup>0</sup>   | b <sup>0++</sup> | Seq. | y                | y <sup>++</sup> | y*              | y <sup>+++</sup> | y <sup>0</sup>   | y <sup>0++</sup> | #  |
|----|------------------|-----------------|------------------|------------------|------------------|------------------|------|------------------|-----------------|-----------------|------------------|------------------|------------------|----|
| 1  | 114.0913         | 57.5493         |                  |                  |                  |                  | I    |                  |                 |                 |                  |                  |                  | 16 |
| 2  | <b>211.1441</b>  | 106.0757        |                  |                  |                  |                  | P    | 1696.9038        | <b>848.9555</b> | 1679.8773       | <b>840.4423</b>  | 1678.8332        | <b>839.9503</b>  | 15 |
| 3  | <b>325.1870</b>  | 163.0972        | 308.1605         | 154.5839         |                  |                  | N    | 1599.8511        | <b>800.4292</b> | 1582.8245       | 791.9159         | 1581.8405        | 791.4239         | 14 |
| 4  | 472.2554         | 236.6314        | <b>455.2239</b>  | 228.1181         |                  |                  | F    | 1485.8081        | <b>743.4077</b> | 1468.7816       | 734.8944         | <b>1467.7976</b> | 734.4024         | 13 |
| 5  | 674.4145         | 337.7109        | 657.3879         | 329.1976         |                  |                  | K    | 1338.7397        | <b>669.8735</b> | 1321.7132       | 661.3602         | 1320.7291        | 660.8882         | 12 |
| 6  | 731.4359         | 366.2216        | <b>714.4094</b>  | 357.7083         |                  |                  | G    | <b>1136.5807</b> | <b>568.7940</b> | 1119.5541       | 560.2907         | 1118.5701        | 559.7887         | 11 |
| 7  | 802.4730         | 401.7402        | 785.4465         | 393.2269         |                  |                  | A    | 1079.5592        | 540.2833        | 1062.5327       | 531.7700         | 1061.5487        | 531.2780         | 10 |
| 8  | <b>889.5051</b>  | 445.2562        | 872.4785         | 436.7429         | 871.4945         | 436.2509         | S    | <b>1008.5221</b> | 504.7647        | 991.4956        | 496.2514         | <b>990.5116</b>  | 495.7594         | 9  |
| 9  | <b>1026.5640</b> | <b>513.7856</b> | 1009.5374        | 505.2724         | <b>1008.5534</b> | 504.7803         | H    | <b>921.4901</b>  | <b>461.2487</b> | 904.4635        | 452.7354         | 903.4795         | 452.2434         | 8  |
| 10 | 1097.6011        | <b>549.3042</b> | 1080.5745        | 540.7909         | 1079.5905        | 540.2989         | A    | <b>784.4312</b>  | 392.7192        | <b>767.4046</b> | 384.2060         | 766.4206         | 383.7139         | 7  |
| 11 | 1168.6382        | <b>584.8227</b> | 1151.6117        | 576.3095         | 1150.6276        | 575.8175         | A    | <b>713.3941</b>  | 357.2007        | 696.3675        | 348.6874         | 695.3835         | 348.1954         | 6  |
| 12 | 1297.6808        | 649.3440        | <b>1280.6542</b> | 640.8308         | 1279.6702        | 640.3388         | E    | <b>642.3570</b>  | <b>321.6821</b> | 625.3304        | 313.1688         | 624.3464         | 312.6768         | 5  |
| 13 | 1425.7394        | <b>713.3733</b> | 1408.7128        | <b>704.8601</b>  | 1407.7288        | 704.3680         | Q    | <b>513.3144</b>  | 257.1608        | 496.2878        | 248.6475         |                  |                  | 4  |
| 14 | 1538.8234        | 769.9154        | 1521.7969        | 761.4021         | 1520.8129        | 760.9101         | L    | <b>385.2558</b>  | 193.1315        | 368.2292        | 184.6183         |                  |                  | 3  |
| 15 | 1635.8762        | 818.4417        | 1618.8497        | 809.9285         | 1617.8656        | 809.4365         | P    | <b>272.1717</b>  | 136.5895        | 255.1452        | 128.0762         |                  |                  | 2  |
| 16 |                  |                 |                  |                  |                  |                  | R    | 175.1190         | 88.0631         | 158.0924        | 79.5498          |                  |                  | 1  |

MS/MS Fragmentation of **PKMPGR**Found in **Q9Y5K6**, CD2-associated protein OS=Homo sapiens GN=CD2AP PE=1 SV=1

Match to Query 221: 762.461828 from(382.238190, 2+) intensity(97489.3281)

Title: File392 Spectrum4019 scans: 4788

Data file \\192.168.1.104\public\raw data\Elite\_01\methylation\_ZW\SW620\2013-5-16-620-Kpropio-methyl-IP-Fr6-ZW.mgf

Click mouse within plot area to zoom in by factor of two about that point

Or,   to  Da Label all possible matches  Label matches used for scoring 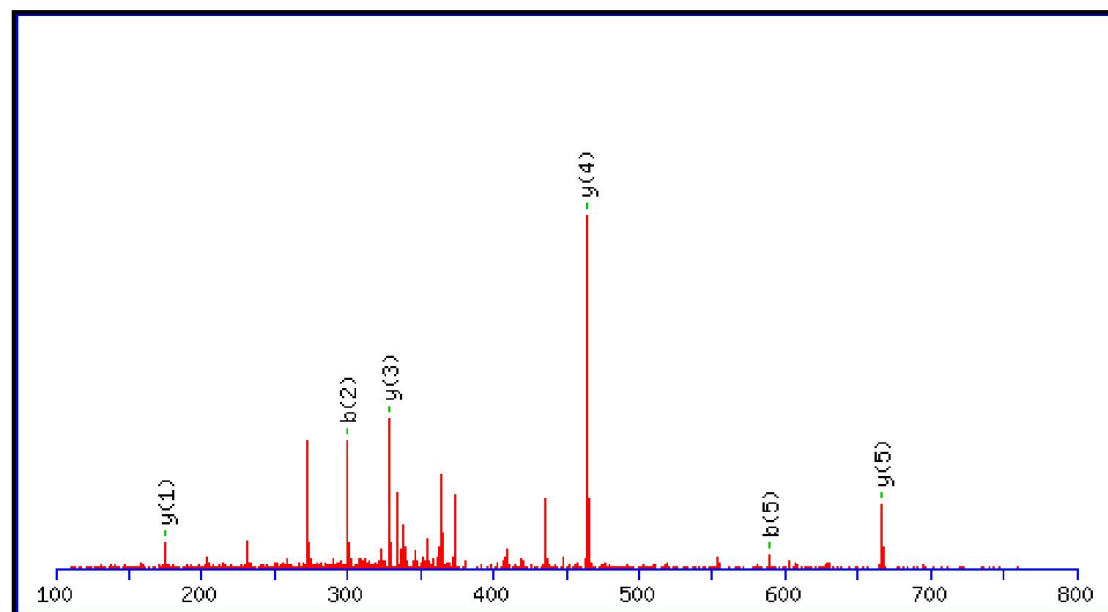**Monoisotopic mass of neutral peptide Mr(calc):** 762.4603**Fixed modifications:** Carbamidomethyl (C) (apply to specified residues or termini only)**Variable modifications:****K2** : Propionyl-(13CD3)Methyl (K)**M3** : Label:13C(1)2H(3) (M)**Ions Score:** 36 **Expect:** 0.059**Matches** : 6/38 fragment ions using 7 most intense peaks ([help](#))

| # | b               | b <sup>++</sup> | b*       | b <sup>*++</sup> | Seq. | y               | y <sup>++</sup> | y*       | y <sup>*++</sup> | # |
|---|-----------------|-----------------|----------|------------------|------|-----------------|-----------------|----------|------------------|---|
| 1 | 98.0600         | 49.5337         |          |                  | P    |                 |                 |          |                  | 6 |
| 2 | <b>300.2191</b> | 150.6132        | 283.1925 | 142.0999         | K    | <b>666.4149</b> | 333.7111        | 649.3883 | 325.1978         | 5 |
| 3 | 435.2817        | 218.1445        | 418.2552 | 209.6312         | M    | <b>464.2558</b> | 232.6316        | 447.2293 | 224.1183         | 4 |
| 4 | 532.3345        | 266.6709        | 515.3079 | 258.1576         | P    | <b>329.1932</b> | 165.1002        | 312.1666 | 156.5870         | 3 |
| 5 | <b>589.3560</b> | 295.1816        | 572.3294 | 286.6683         | G    | 232.1404        | 116.5738        | 215.1139 | 108.0606         | 2 |
| 6 |                 |                 |          |                  | R    | <b>175.1190</b> | 88.0631         | 158.0924 | 79.5498          | 1 |



Found in **H7C5D0**, Protein DENND6A (Fragment) OS=Homo sapiens GN=DENND6A PE=4 SV=1

Match to Query 14565: 2009.043972 from(670.688600, 3+) intensity(31107.2813)

Title: File388 Spectrum17027 scans: 19170

Data file \\192.168.1.104\public\raw data\Elite\_01\methylation\_ZW\SW620\2013-5-16-620-Kpropio-methyl-IP-Fr16-ZW.mgf

Click mouse within plot area to zoom in by factor of two about that point

Or,   to  DaLabel all possible matches  Label matches used for scoring 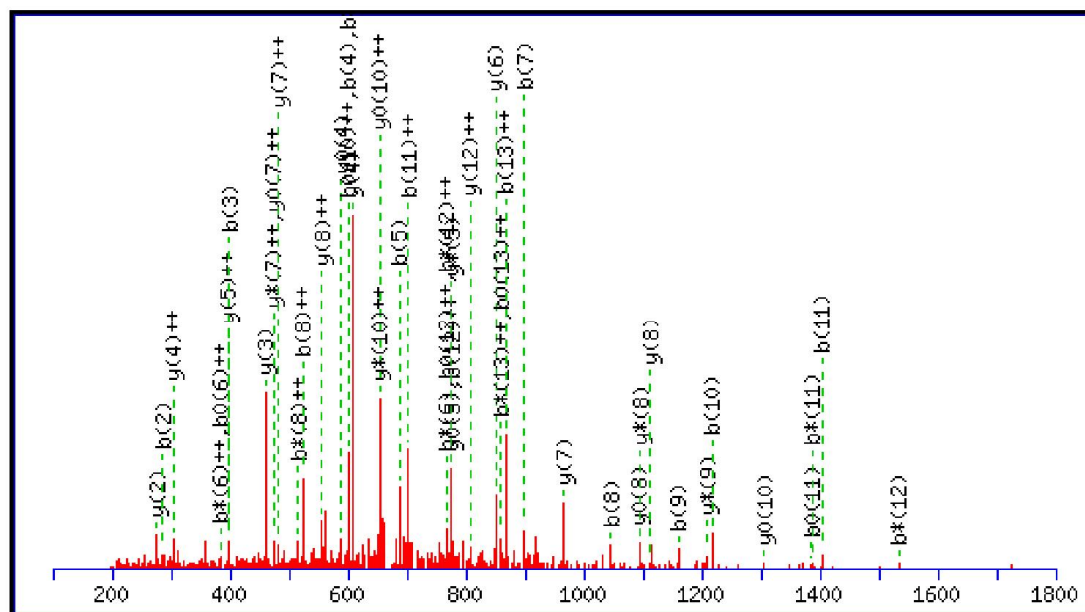Monoisotopic mass of neutral peptide  $M_r(\text{calc})$ : 2009.0432

Fixed modifications: Carbamidomethyl (C) (apply to specified residues or

Variable modifications:

K4 : Propionyl-(13CD3)Methyl (K)

K13 : Propionyl (K)

Ions Score: 36 Expect: 0.17

Matches : 48/152 fragment ions using 80 most intense peaks ([help](#))

| #  | b                | b <sup>++</sup> | b*               | b <sup>++</sup> | b <sup>0</sup>   | b <sup>0++</sup> | Seq. | y                | y <sup>++</sup> | y*               | y <sup>++</sup> | y <sup>0</sup>   | y <sup>0++</sup> | #  |
|----|------------------|-----------------|------------------|-----------------|------------------|------------------|------|------------------|-----------------|------------------|-----------------|------------------|------------------|----|
| 1  | 138.0662         | 69.5367         |                  |                 |                  |                  | H    |                  |                 |                  |                 |                  |                  | 15 |
| 2  | <b>285.1346</b>  | 143.0709        |                  |                 |                  |                  | F    | 1872.9916        | 936.9994        | 1855.9650        | 928.4861        | 1854.9810        | 927.9941         | 14 |
| 3  | <b>398.2187</b>  | 199.6130        |                  |                 |                  |                  | L    | 1725.9232        | 863.4652        | 1708.8966        | 854.9519        | 1707.9126        | 854.4599         | 13 |
| 4  | <b>600.3777</b>  | 900.6925        | 583.3511         | 292.1792        |                  |                  | K    | 1612.8391        | <b>806.9232</b> | 1595.8125        | 798.4099        | 1594.8285        | 797.9179         | 12 |
| 5  | <b>687.4097</b>  | 344.2085        | 670.3832         | 335.6952        | 669.3991         | 335.2032         | S    | 1410.6801        | 705.8437        | 1393.6535        | 697.3304        | 1392.6695        | 696.8384         | 11 |
| 6  | 784.4625         | 392.7349        | <b>767.4359</b>  | <b>384.2216</b> | 766.4519         | <b>383.7296</b>  | P    | 1323.6480        | 662.3277        | 1306.6215        | <b>653.8144</b> | <b>1305.6375</b> | <b>653.3224</b>  | 10 |
| 7  | <b>898.5054</b>  | 449.7563        | 881.4783         | 441.2431        | 880.4948         | 440.7511         | N    | 1226.5953        | 613.8013        | <b>1209.5687</b> | 605.2880        | 1208.5847        | 604.7960         | 9  |
| 8  | <b>1045.5738</b> | <b>523.2905</b> | 1028.5473        | <b>514.7773</b> | 1027.5632        | 514.2853         | F    | <b>1112.5524</b> | <b>556.7798</b> | <b>1096.5258</b> | 548.2665        | <b>1094.5418</b> | 547.7745         | 8  |
| 9  | <b>1160.6008</b> | 580.8040        | 1143.6742        | 572.2907        | 1142.5902        | 571.7987         | D    | <b>965.4839</b>  | <b>483.2456</b> | 948.4574         | <b>474.7323</b> | 947.4734         | <b>474.2403</b>  | 7  |
| 10 | <b>1217.6222</b> | 609.3147        | 1200.5957        | <b>600.8015</b> | 1199.6117        | <b>600.3095</b>  | G    | <b>850.4570</b>  | 425.7321        | 833.4305         | 417.2139        | 832.4464         | 416.7269         | 6  |
| 11 | <b>1403.7015</b> | <b>702.3544</b> | <b>1386.6750</b> | 693.8411        | <b>1385.6910</b> | 693.3491         | W    | 793.4355         | <b>397.2214</b> | <b>776.4090</b>  | 388.7081        | <b>775.4250</b>  | 388.2161         | 5  |
| 12 | 1550.7699        | <b>775.8886</b> | <b>1533.7434</b> | <b>767.3753</b> | 1532.7594        | <b>766.8833</b>  | F    | <b>607.3562</b>  | <b>304.1817</b> | 590.3297         | 295.6685        | <b>589.3457</b>  | 295.1765         | 4  |
| 13 | 1734.8911        | <b>867.9492</b> | 1717.8646        | <b>859.4359</b> | 1716.8806        | <b>858.9439</b>  | K    | <b>460.2878</b>  | 230.6475        | 443.2613         | 222.1343        | 442.2772         | 221.6423         | 3  |
| 14 | 1835.9388        | 918.4730        | 1818.9123        | 909.9598        | 1817.9282        | 909.4678         | T    | <b>276.1666</b>  | 138.5870        | 259.1401         | 130.0737        | 258.1561         | 129.5817         | 2  |
| 15 |                  |                 |                  |                 |                  |                  | R    | 175.1190         | 88.0631         | 158.0924         | 79.5493         |                  |                  | 1  |

MS/MS Fragmentation of **SGLLKALR**

Found in **F8WE41**, Nuclear cap-binding protein subunit 2 OS=Homo sapiens GN=NCBP2 PE=2 SV=1

Match to Query 3108: 1029.646328 from(515.830440,2+) intensity(9958.5732)

Title: File390 Spectrum12907 scans: 15436

Data file \\192.168.1.104\public\raw data\Elite\_01\methylation\_ZW\SW620\2013-5-16-620-Kpropio-methyl-IP-Fr2-ZW.mgf

Click mouse within plot area to zoom in by factor of two about that point

Or,   to  Da

Label all possible matches  Label matches used for scoring

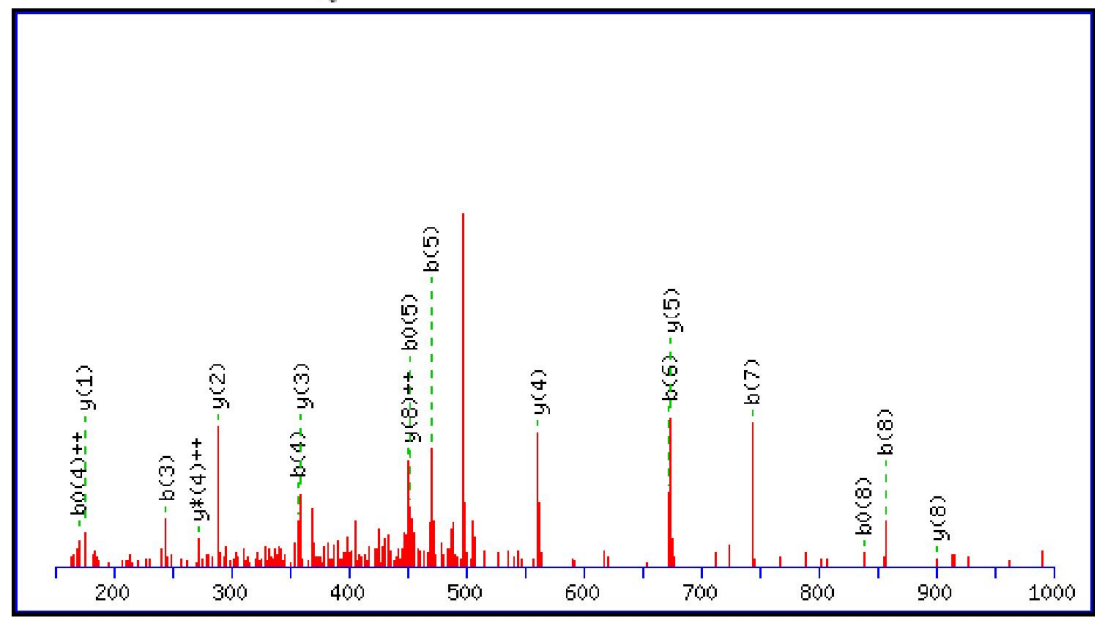

**Monoisotopic mass of neutral peptide Mr(calc):** 1029.6455

**Fixed modifications:** Carbamidomethyl (C) (apply to specified residues or termini only)

**Variable modifications:**

**N-term :** Acetyl (Protein N-term)

**K6 :** Propionyl-(13CD3)Methyl (K)

**Ions Score:** 36 **Expect:** 0.045

**Matches :** 17/70 fragment ions using 33 most intense peaks [\(help\)](#)

| # | b               | b <sup>++</sup> | b <sup>+</sup>  | b <sup>+++</sup> | b <sup>0</sup>  | b <sup>0++</sup> | Seq. | y               | y <sup>++</sup> | y <sup>+</sup> | y <sup>+++</sup> | # |
|---|-----------------|-----------------|-----------------|------------------|-----------------|------------------|------|-----------------|-----------------|----------------|------------------|---|
| 1 | 130.0499        | 65.5286         |                 |                  | 112.0393        | 56.5233          | S    |                 |                 |                |                  | 9 |
| 2 | 187.0713        | 94.0393         |                 |                  | 169.0608        | 85.0340          | G    | <b>901.6102</b> | <b>451.3087</b> | 884.5837       | 442.7955         | 8 |
| 3 | <b>244.0928</b> | 122.5500        |                 |                  | 226.0822        | 113.5448         | G    | 844.5887        | 422.7980        | 827.5622       | 414.2847         | 7 |
| 4 | <b>357.1769</b> | 179.0921        |                 |                  | 339.1663        | <b>170.0868</b>  | L    | 787.5673        | 394.2873        | 770.5407       | 385.7740         | 6 |
| 5 | <b>470.2609</b> | 235.6341        |                 |                  | <b>452.2504</b> | 226.6288         | L    | <b>674.4832</b> | 337.7452        | 657.4567       | 329.2320         | 5 |
| 6 | <b>672.4199</b> | 336.7136        | <b>655.5934</b> | 328.2003         | 654.4094        | 327.7083         | K    | <b>561.3991</b> | 281.2032        | 544.5726       | <b>272.6899</b>  | 4 |
| 7 | <b>743.4571</b> | 372.2322        | 726.4305        | 363.7189         | 725.4465        | 363.2269         | A    | <b>359.2407</b> | 180.1237        | 342.2136       | 171.6104         | 3 |
| 8 | <b>856.5411</b> | 428.7742        | 839.5146        | 420.2609         | <b>838.5306</b> | 419.7689         | L    | <b>288.2030</b> | 144.6051        | 271.1765       | 136.0919         | 2 |
| 9 |                 |                 |                 |                  |                 |                  | R    | <b>175.1190</b> | 88.0631         | 158.0924       | 79.5498          | 1 |

MS/MS Fragmentation of **PAAAKLKASR**Found in **A7E2D7**, E1A-binding protein p400 (Fragment) OS=Homo sapiens GN=EP400 PE=2 SV=1

Match to Query 3401: 1141.707988 from(571.861270, 2+) intensity(5912.1660)

Title: File443 Spectrum7209 scans: 8456

Data file \\192.168.1.104\public\raw data\Elite\_01\methylation\_ZW\SW620\2013-6-6-SW620-Kpropio-methyl-IP-Fr15-ZW.mgf

Click mouse within plot area to zoom in by factor of two about that point

Or,   to  Da Label all possible matches  Label matches used for scoring 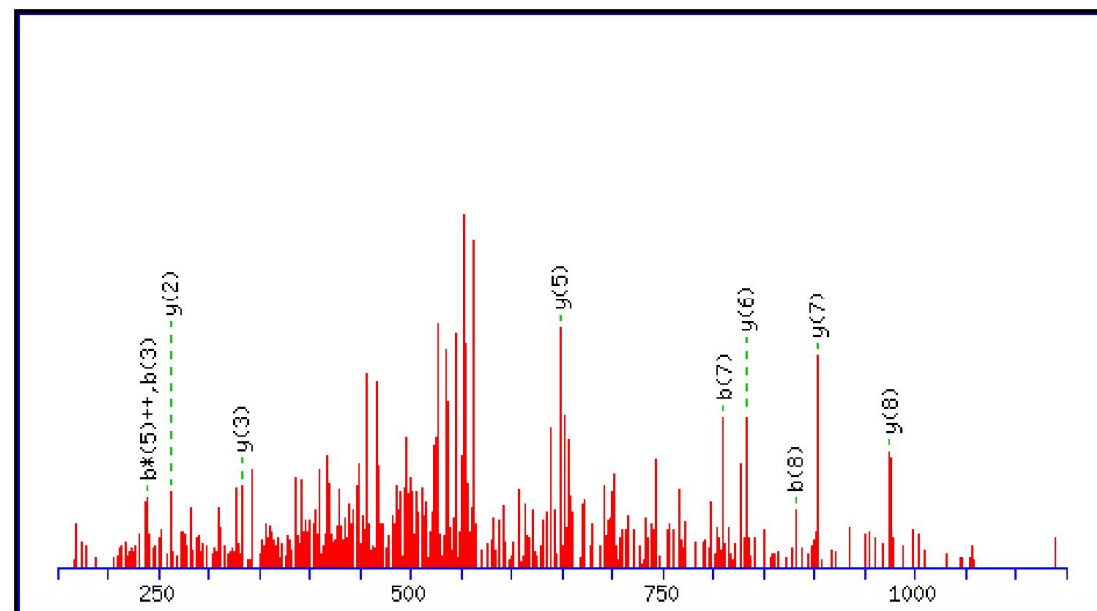**Monoisotopic mass of neutral peptide****Fixed modifications:** Carbamidomethyl (C)**Variable modifications:****K5** : Propionyl (K)**K7** : Propionyl-(13CD3)Methyl (K)**Ions Score:** 35 **Expect:** 0.059**Matches** : 10/82 fragment ions using 19 mo

| #  | b               | b <sup>++</sup> | b*       | b <sup>+++</sup> | b <sup>0</sup> | b <sup>0++</sup> | Seq. | y               | y <sup>++</sup> | y*        | y <sup>+++</sup> | y <sup>0</sup> | y <sup>0++</sup> | #  |
|----|-----------------|-----------------|----------|------------------|----------------|------------------|------|-----------------|-----------------|-----------|------------------|----------------|------------------|----|
| 1  | 98.0600         | 49.5337         |          |                  |                |                  | P    |                 |                 |           |                  |                |                  | 10 |
| 2  | 169.0972        | 85.0522         |          |                  |                |                  | A    | 1045.6637       | 523.3355        | 1028.6371 | 514.8222         | 1027.6531      | 514.3302         | 9  |
| 3  | <b>240.1343</b> | 120.5708        |          |                  |                |                  | A    | <b>974.6266</b> | 487.8169        | 957.6000  | 479.3037         | 956.6160       | 478.8116         | 8  |
| 4  | 311.1714        | 156.0893        |          |                  |                |                  | A    | <b>903.5895</b> | 452.2984        | 886.5629  | 443.7851         | 885.5789       | 443.2931         | 7  |
| 5  | 495.2926        | 248.1499        | 478.2660 | <b>239.6366</b>  |                |                  | K    | <b>832.5523</b> | 416.7798        | 815.5258  | 408.2665         | 814.5418       | 407.7745         | 6  |
| 6  | 608.3766        | 304.6920        | 591.3501 | 296.1787         |                |                  | L    | <b>648.4312</b> | 324.7192        | 631.4046  | 316.2059         | 630.4206       | 315.7139         | 5  |
| 7  | <b>810.5356</b> | 405.7715        | 793.5091 | 397.2582         |                |                  | K    | 535.3471        | 268.1772        | 518.3206  | 259.6639         | 517.3365       | 259.1719         | 4  |
| 8  | <b>881.5728</b> | 441.2900        | 864.5462 | 432.7767         |                |                  | A    | <b>333.1881</b> | 167.0977        | 316.1615  | 158.5844         | 315.1775       | 158.0924         | 3  |
| 9  | 968.6048        | 484.8060        | 951.5782 | 476.2928         | 950.5942       | 475.8007         | S    | <b>262.1510</b> | 131.5791        | 245.1244  | 123.0659         | 244.1404       | 122.5738         | 2  |
| 10 |                 |                 |          |                  |                |                  | R    | 175.1190        | 88.0631         | 158.0924  | 79.5498          |                |                  | 1  |

MS/MS Fragmentation of **EHYLKQKR**

Found in **B5MCA1**, Coiled-coil domain-containing protein 104 OS=Homo sapiens GN=CCDC104 PE=2 SV=1

Match to Query 3842: 1230.698708 from(616.356630,2+) intensity(78258.2266)

Title: File660 Spectrum4402 scans: 5486

Data file \\192.168.1.104\public\raw data\Elite\_01\methylation\_ZW\SW620\2013-6-18-SW620-Kpropio-methyl-IP-Fr3-ZW.mgf

Click mouse within plot area to zoom in by factor of two about that point

Or,   to  Da

Label all possible matches  Label matches used for scoring

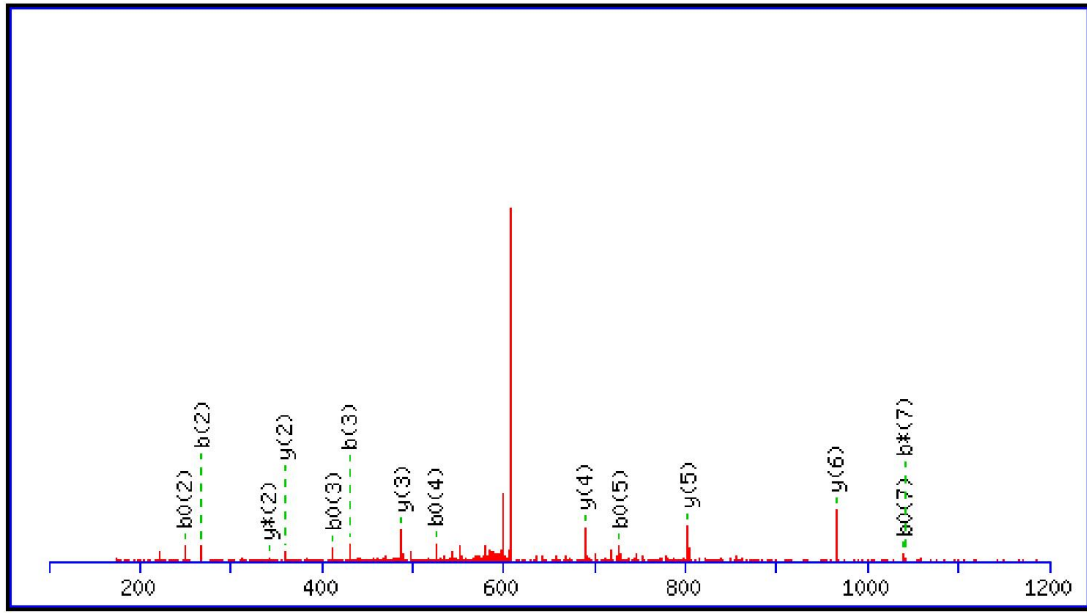

**Monoisotopic mass of neutral peptide Mr(calc):** 1230.6993

**Fixed modifications:** Carbamidomethyl (C) (apply to specified residues or termini only)

**Variable modifications:**

**K5** : Propionyl-(13CD3)Methyl (K)

**K7** : Propionyl (K)

**Ions Score:** 35 **Expect:** 0.13

**Matches** : 14/62 fragment ions using 21 most intense peaks ([help](#))

| # | b               | b <sup>++</sup> | b <sup>+</sup> | b <sup>+++</sup> | b <sup>0</sup> | b <sup>0++</sup> | Seq. | y               | y <sup>++</sup> | y <sup>+</sup> | y <sup>+++</sup> | # |
|---|-----------------|-----------------|----------------|------------------|----------------|------------------|------|-----------------|-----------------|----------------|------------------|---|
| 1 | 130.0499        | 65.5286         |                |                  | 112.0393       | 56.5233          | K    |                 |                 |                |                  | 8 |
| 2 | <b>267.1088</b> | 134.0580        |                |                  | 249.0982       | 125.0527         | H    | 1102.6640       | 551.8357        | 1085.6375      | 543.3224         | 7 |
| 3 | <b>430.1721</b> | 215.5897        |                |                  | 412.1615       | 206.5844         | Y    | <b>965.6051</b> | 483.3062        | 948.5786       | 474.7929         | 6 |
| 4 | 543.2562        | 272.1317        |                |                  | 525.2456       | 263.1264         | L    | <b>802.5418</b> | 401.7745        | 785.5152       | 393.2613         | 5 |
| 5 | 745.4152        | 373.2112        | 728.3886       | 364.6980         | 727.4046       | 364.2059         | K    | <b>689.4577</b> | 345.2325        | 672.4312       | 336.7192         | 4 |
| 6 | 873.4738        | 437.2405        | 856.4472       | 428.7272         | 855.4632       | 428.2352         | Q    | <b>487.2987</b> | 244.1530        | 470.2722       | 235.6397         | 3 |
| 7 | 1057.5949       | 529.3011        | 1040.5684      | 520.7878         | 1039.5844      | 520.2958         | K    | <b>359.2401</b> | 180.1237        | 342.2136       | 171.6104         | 2 |
| 8 |                 |                 |                |                  |                |                  | R    | 175.1190        | 88.0631         | 158.0924       | 79.5498          | 1 |

Found in **Q9UMY1**, Nucleolar protein 7 OS=Homo sapiens GN=NOL7 PE=1 SV=2

Match to Query 1545: 960.551188 from(481.282870, 2+) intensity(66393.2109)

Title: File388 Spectrum5403 scans: 6512

Data file \\192.168.1.104\public\raw data\Elite\_01\methylation\_ZW\SW620\2013-5-16-620-Kpropio-methyl-IP-Fr16-ZW.mgf

Click mouse within plot area to zoom in by factor of two about that point

Or,   to  Da Label all possible matches  Label matches used for scoring 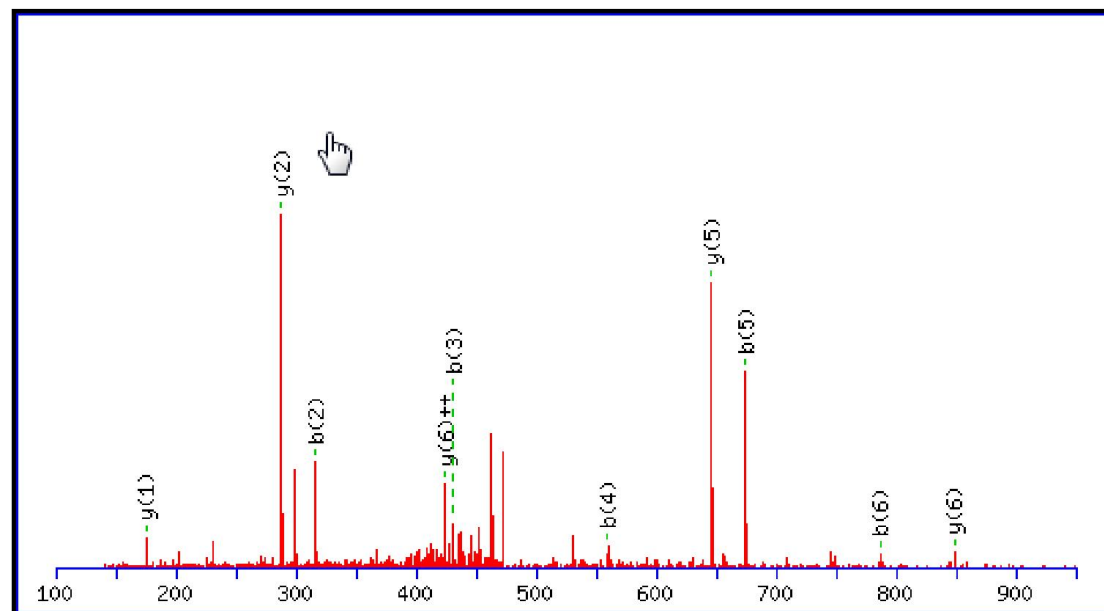**Monoisotopic mass of neutral peptide Mr(calc):** 960.5513**Fixed modifications:** Carbamidomethyl (C) (apply to specified residues or termini only)**Variable modifications:****K2** : Propionyl-(13CD3)Methyl (K)**Ions Score:** 35 **Expect:** 0.1**Matches** : 10/62 fragment ions using 18 most intense peaks ([help](#))

| # | b                   | b <sup>++</sup> | b*       | b <sup>+++</sup> | b <sup>0</sup> | b <sup>0++</sup> | Seq. | y                   | y <sup>++</sup> | y*       | y <sup>+++</sup> | y <sup>0</sup> | y <sup>0++</sup> | # |
|---|---------------------|-----------------|----------|------------------|----------------|------------------|------|---------------------|-----------------|----------|------------------|----------------|------------------|---|
| 1 | 114.0913            | 57.5493         |          |                  |                |                  | L    |                     |                 |          |                  |                |                  | 7 |
| 2 | <del>316.2509</del> | 158.6288        | 299.2238 | 150.1155         |                |                  | K    | <del>848.4745</del> | 424.7409        | 831.4479 | 416.2276         | 830.4639       | 415.7356         | 6 |
| 3 | <del>431.2773</del> | 216.1423        | 414.2607 | 207.6290         | 413.2667       | 207.1370         | D    | <del>646.3155</del> | 323.6614        | 629.2889 | 315.1481         | 628.3049       | 314.6561         | 5 |
| 4 | <del>559.3359</del> | 280.1716        | 542.3093 | 271.6583         | 541.3253       | 271.1663         | Q    | 531.2885            | 266.1479        | 514.2620 | 257.6348         | 513.2780       | 257.1426         | 4 |
| 5 | <del>674.3620</del> | 337.6850        | 657.3363 | 329.1718         | 656.3523       | 328.6798         | D    | 403.2300            | 202.1186        | 386.2034 | 193.6053         | 385.2194       | 193.1133         | 3 |
| 6 | <del>787.4459</del> | 394.2271        | 770.4203 | 385.7138         | 769.4363       | 385.2218         | L    | <del>288.2030</del> | 144.6051        | 271.1765 | 136.0919         |                |                  | 2 |
| 7 |                     |                 |          |                  |                |                  | R    | <del>175.1190</del> | 88.0631         | 158.0924 | 79.5498          |                |                  | 1 |

Found in BIANRO, Poly(A) binding protein, cytoplasmic 4 (Inducible form), isoform CRA\_e OS=Homo sapiens GN=PABPC4 PE=2 SV=1

Match to Query 6842: 1466.783892 from(489.935240, 3+) intensity(78308.3359)

Title: File440 Spectrum6594 scans: 7697

Data file \\192.168.1.104\public\raw data\Elite\_01\methylation\_ZW\SW620\2013-6-5-SW620-Kpropio-methyl-IP-Fr11-ZW.mgf

Click mouse within plot area to zoom in by factor of two about that point

Or,   to  Da Label all possible matches  Label matches used for scoring 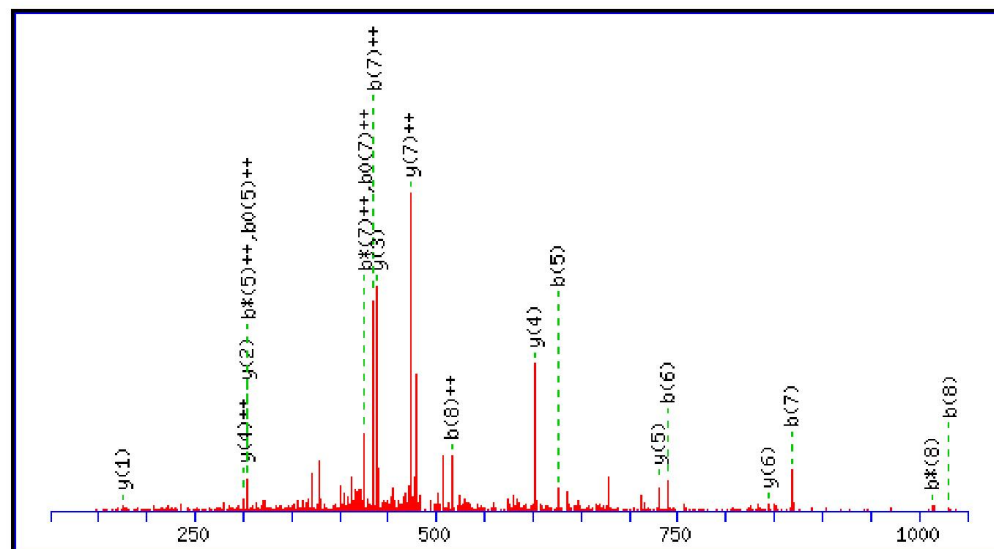**Monoisotopic mass of neutral peptide  $M_r(\text{calc})$ :** 1466.7845**Fixed modifications:** Carbamidomethyl (C) (apply to specified residues or termini only)**Variable modifications:****K1** : Propionyl-(13CD3)Methyl (K)**M9** : Label:13C(1)2H(3) (M)**Ions Score:** 35 **Expect:** 0.17**Matches** : 19/100 fragment ions using 27 most intense peaks ([help](#))

| #  | b                | b <sup>++</sup> | b <sup>+</sup>   | b <sup>*++</sup> | b <sup>0</sup> | b <sup>0++</sup> | Seq. | y               | y <sup>++</sup> | y <sup>+</sup> | y <sup>*++</sup> | y <sup>0</sup> | y <sup>0++</sup> | #  |
|----|------------------|-----------------|------------------|------------------|----------------|------------------|------|-----------------|-----------------|----------------|------------------|----------------|------------------|----|
| 1  | 203.1663         | 102.0868        | 186.1397         | 93.5735          |                |                  | K    |                 |                 |                |                  |                |                  | 11 |
| 2  | 274.2034         | 137.6053        | 257.1769         | 129.0921         |                |                  | A    | 1265.6328       | 633.3200        | 1248.6063      | 624.8068         | 1247.6222      | 624.3143         | 10 |
| 3  | 411.2623         | 206.1348        | 394.2358         | 197.6215         |                |                  | H    | 1194.5957       | 597.8015        | 1177.5691      | 589.2882         | 1176.5851      | 588.7962         | 9  |
| 4  | 524.3464         | 262.6768        | 507.3198         | 254.1636         |                |                  | L    | 1057.5368       | 529.2720        | 1040.5102      | 520.7588         | 1039.5262      | 520.2667         | 8  |
| 5  | <b>625.3941</b>  | 313.2007        | 608.3675         | <b>304.6874</b>  | 607.3835       | <b>304.1954</b>  | T    | 944.4527        | <b>472.7300</b> | 927.4262       | 464.2167         | 926.4421       | 463.7247         | 7  |
| 6  | <b>739.4370</b>  | 370.2221        | 722.4104         | 361.7089         | 721.4264       | 361.2168         | N    | <b>843.4050</b> | 422.2062        | 826.3785       | 413.6929         |                |                  | 6  |
| 7  | <b>867.4956</b>  | <b>434.2514</b> | 850.4690         | <b>425.7381</b>  | 849.4850       | <b>425.2461</b>  | Q    | <b>729.3621</b> | 365.1847        | 712.3356       | 356.6714         |                |                  | 5  |
| 8  | <b>1030.5589</b> | <b>515.7831</b> | <b>1013.5323</b> | 507.2698         | 1012.5483      | 506.7778         | Y    | <b>601.3035</b> | <b>301.1554</b> | 584.2770       | 292.6421         |                |                  | 4  |
| 9  | 1165.6216        | 583.3144        | 1148.5950        | 574.3011         | 1147.6110      | 574.3091         | H    | <b>438.2402</b> | 219.6237        | 421.2137       | 211.1105         |                |                  | 3  |
| 10 | 1293.6801        | 647.3437        | 1276.6536        | 638.3304         | 1275.6696      | 638.3384         | Q    | <b>303.1775</b> | 152.0924        | 286.1510       | 143.5791         |                |                  | 2  |
| 11 |                  |                 |                  |                  |                |                  | R    | <b>175.1190</b> | 88.0631         | 158.0924       | 79.5498          |                |                  | 1  |

MS/MS Fragmentation of **HLEMDAFKR**

Found in **J3KPS2**, Protein FAM83H (Fragment) OS=Homo sapiens GN=FAM83H PE=4 SV=1

Match to Query 3757: 1223.649028 from(612.831790, 2+) intensity(28718.8613)

Title: File419 Spectrum9103 scans: 10628

Data file \\192.168.1.104\public\raw data\Elite\_01\methylation\_ZW\SW620\2013-06-05-SW620-Kpropio-methyl-IP-Fr9-ZW.mgf

Click mouse within plot area to zoom in by factor of two about that point

Or,   to  Da

Label all possible matches  Label matches used for scoring

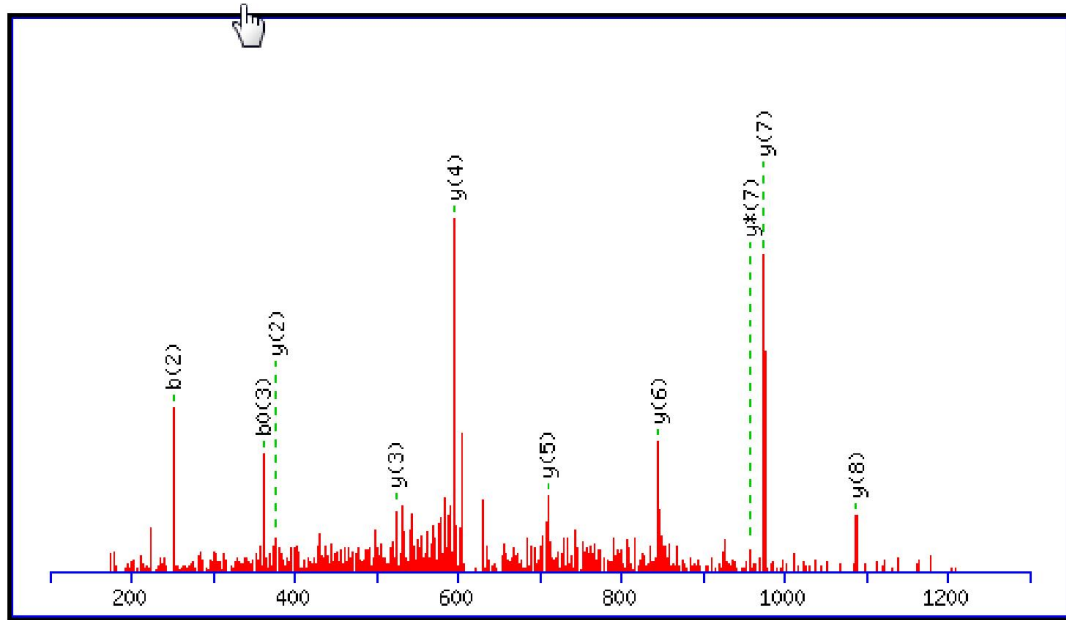

**Monoisotopic mass of neutral peptide Mr(calc): 1223.6514**

**Fixed modifications:** Carbamidomethyl (C) (apply to specified residues or termini only)

**Variable modifications:**

**M4** : Label:13C(1)2H(3) (M)

**K8** : Propionyl-(13CD3)Methyl (K)

**Ions Score:** 34 **Expect:** 0.15

**Matches** : 10/70 fragment ions using 22 most intense peaks [\(help\)](#)

| # | b               | b++      | b+        | b*++     | b <sup>0</sup>  | b <sup>0</sup> ++ | Seq. | y                | y++      | y+              | y*++     | y <sup>0</sup> | y <sup>0</sup> ++ | # |
|---|-----------------|----------|-----------|----------|-----------------|-------------------|------|------------------|----------|-----------------|----------|----------------|-------------------|---|
| 1 | 138.0662        | 69.5367  |           |          |                 |                   | H    |                  |          |                 |          |                |                   | 9 |
| 2 | <b>261.1603</b> | 126.0788 |           |          |                 |                   | L    | <b>1087.5998</b> | 544.3035 | 1070.5732       | 535.7902 | 1069.5882      | 535.2982          | 8 |
| 3 | 380.1928        | 190.6001 |           |          | <b>362.1823</b> | 181.5948          | E    | <b>974.5157</b>  | 487.7615 | <b>957.4891</b> | 479.2482 | 956.5051       | 478.7582          | 7 |
| 4 | 515.2555        | 258.1314 |           |          | 497.2450        | 249.1261          | K    | <b>845.4731</b>  | 423.2402 | 828.4466        | 414.7269 | 827.4625       | 414.2349          | 6 |
| 5 | 630.2825        | 315.6449 |           |          | 612.2719        | 306.6396          | D    | <b>710.4104</b>  | 355.7089 | 693.3839        | 347.1956 | 692.3999       | 346.7036          | 5 |
| 6 | 701.3196        | 351.1634 |           |          | 683.3090        | 342.1581          | A    | <b>595.3835</b>  | 298.1954 | 578.3569        | 289.6821 |                |                   | 4 |
| 7 | 848.3880        | 424.6976 |           |          | 830.3774        | 415.6923          | F    | <b>524.3464</b>  | 262.6768 | 507.3198        | 254.1636 |                |                   | 3 |
| 8 | 1060.5470       | 525.7771 | 1033.5205 | 517.2639 | 1032.5364       | 516.7719          | K    | <b>377.2780</b>  | 189.1426 | 360.2514        | 180.6293 |                |                   | 2 |
| 9 |                 |          |           |          |                 |                   | R    | 175.1190         | 88.0631  | 158.0924        | 79.5498  |                |                   | 1 |

MS/MS Fragmentation of **SKTVLKR**Found in **Q9UK61**, Protein FAM208A OS=Homo sapiens GN=FAM208A PE=1 SV=3

Match to Query 1822: 960.623748 from(481.319150, 2+) intensity(19628.7578)

Title: File448 Spectrum7200 scans: 8578

Data file \\192.168.1.104\public\raw data\Elite\_01\methylation\_ZW\SW620\2013-6-6-SW620-Kpropio-methyl-IP-Fr7-ZW.mgf

Click mouse within plot area to zoom in by factor of two about that point

Or,   to  Da Label all possible matches  Label matches used for scoring 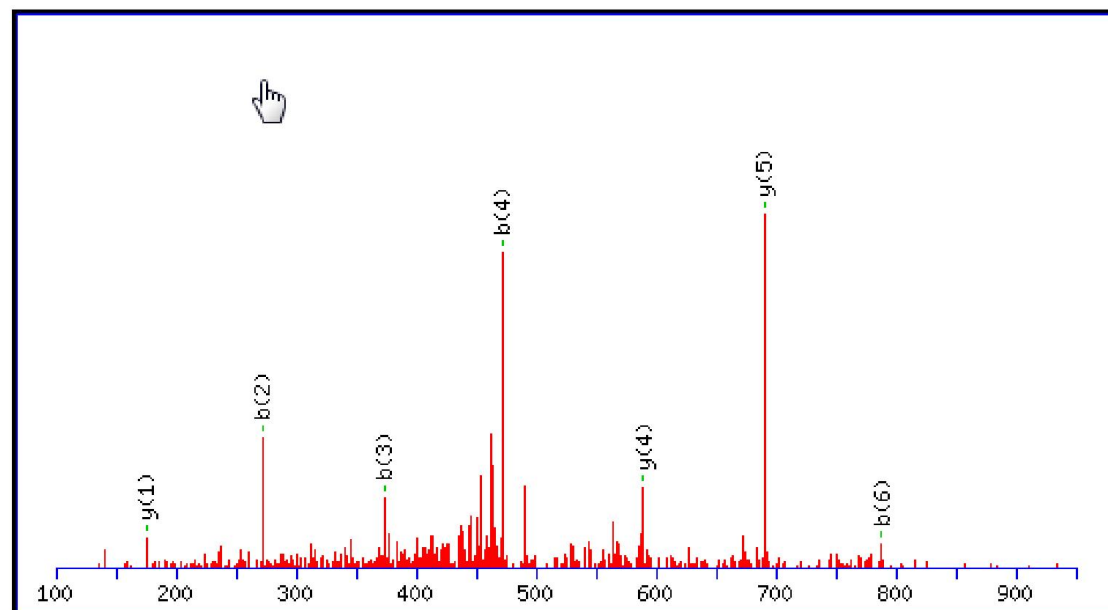Monoisotopic mass of neutral peptide **Mr(calc): 960.6240**

Fixed modifications: Carbamidomethyl (C) (apply to specified residues or termini only)

Variable modifications:

**K2** : Propionyl (K)**K6** : Propionyl-(13CD3)Methyl (K)

Ions Score: 33 Expect: 0.054

Matches : 7/62 fragment ions using 8 most intense peaks ([help](#))

| # | b               | b <sup>++</sup> | b <sup>+</sup> | b <sup>+++</sup> | b <sup>0</sup> | b <sup>0++</sup> | Seq. | y               | y <sup>++</sup> | y <sup>+</sup> | y <sup>+++</sup> | y <sup>0</sup> | y <sup>0++</sup> | # |
|---|-----------------|-----------------|----------------|------------------|----------------|------------------|------|-----------------|-----------------|----------------|------------------|----------------|------------------|---|
| 1 | 88.0393         | 44.5233         |                |                  | 70.0287        | 35.5180          | S    |                 |                 |                |                  |                |                  | 7 |
| 2 | <b>273.1605</b> | 136.5839        | 255.1339       | 128.0706         | 254.1499       | 127.5786         | K    | 874.5993        | 437.3033        | 857.5728       | 429.2900         | 856.5887       | 428.7980         | 6 |
| 3 | <b>373.2082</b> | 187.1077        | 356.1816       | 178.5944         | 355.1976       | 178.1024         | T    | <b>690.4781</b> | 345.7427        | 673.4516       | 337.2294         | 672.4676       | 336.7374         | 5 |
| 4 | <b>473.2766</b> | 236.6419        | 455.2500       | 228.1287         | 454.2660       | 227.6366         | V    | <b>589.4304</b> | 295.2189        | 572.4039       | 286.7056         |                |                  | 4 |
| 5 | 585.3606        | 293.1840        | 568.3341       | 284.6707         | 567.3501       | 284.1787         | L    | 490.3620        | 245.6847        | 473.3355       | 237.1714         |                |                  | 3 |
| 6 | <b>787.5197</b> | 394.2635        | 770.4931       | 385.7502         | 769.5091       | 385.2582         | K    | 377.2780        | 189.1426        | 360.2514       | 180.6293         |                |                  | 2 |
| 7 |                 |                 |                |                  |                |                  | R    | <b>175.1190</b> | 88.0631         | 158.0924       | 79.5498          |                |                  | 1 |



MS/MS Fragmentation of **KPLFR**Found in **Q00534**, Cyclin-dependent kinase 6 OS=Homo sapiens GN=CDK6 PE=1 SV=1

Match to Query 120: 733.476348 from(367.745450, 2+) intensity(149053.1250)

Title: File386 Spectrum10086 scans: 11335

Data file \\192.168.1.104\public\raw data\Elite\_01\methylation\_ZW\SW620\2013-5-16-620-Kpropio-methyl-IP-Fr14-ZW.mgf

Click mouse within plot area to zoom in by factor of two about that point

Or,   to  Da Label all possible matches  Label matches used for scoring 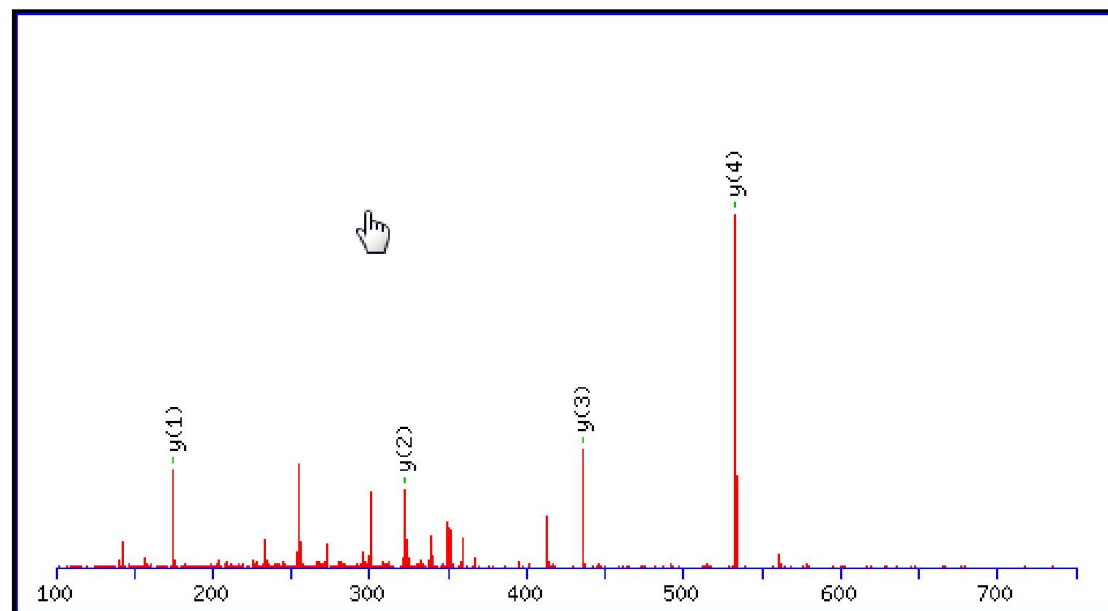**Monoisotopic mass of neutral peptide Mr(calc):** 733.4759**Fixed modifications:** Carbamidomethyl (C) (apply to specified residues or termini only)**Variable modifications:****K1** : Propionyl-(13CD3)Methyl (K)**Ions Score:** 32 **Expect:** 0.06**Matches** : 4/32 fragment ions using 7 most intense peaks ([help](#))

| # | b        | b <sup>++</sup> | b*       | b <sup>*++</sup> | Seq.     | y               | y <sup>++</sup> | y*       | y <sup>*++</sup> | # |
|---|----------|-----------------|----------|------------------|----------|-----------------|-----------------|----------|------------------|---|
| 1 | 203.1663 | 102.0868        | 186.1397 | 93.5735          | <b>K</b> |                 |                 |          |                  | 5 |
| 2 | 300.2191 | 150.6132        | 283.1925 | 142.0999         | <b>P</b> | <b>532.3242</b> | 266.6657        | 515.2976 | 258.1525         | 4 |
| 3 | 413.3031 | 207.1552        | 396.2766 | 198.6419         | <b>L</b> | <b>435.2714</b> | 218.1394        | 418.2449 | 209.6261         | 3 |
| 4 | 560.3715 | 280.6894        | 543.3450 | 272.1761         | <b>F</b> | <b>322.1874</b> | 161.5973        | 305.1608 | 153.0840         | 2 |
| 5 |          |                 |          |                  | <b>R</b> | <b>175.1190</b> | 88.0631         | 158.0924 | 79.5498          | 1 |

Found in **Q9P2G4**, Microtubule-associated protein 10 OS=Homo sapiens GN=MAP10 PE=1 SV=2

Match to Query 7903: 1521.887908 from(761.951230,2+) intensity(32169.0371)

Title: File660 Spectrum7847 scans: 9170

Data file \\192.168.1.104\public\raw data\Elite\_01\methylation\_ZW\SW620\2013-6-18-SW620-Kpropio-methyl-IP-Fr3-ZW.mgf

Click mouse within plot area to zoom in by factor of two about that point

Or,   to  Da Label all possible matches  Label matches used for scoring 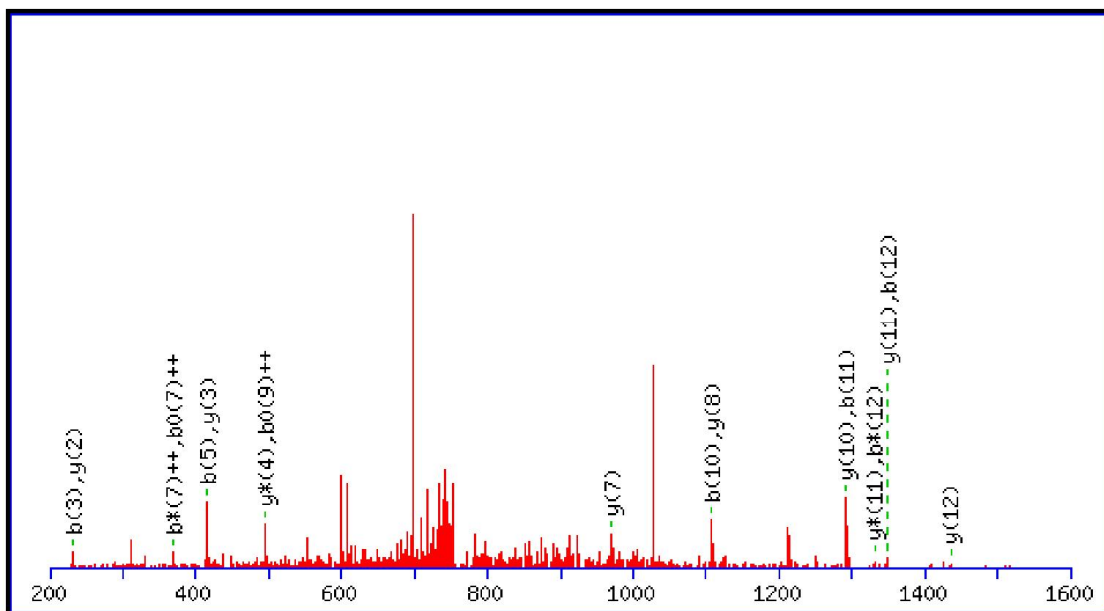Monoisotopic mass of neutral peptide **Mr(calc)**: 1521.9012Fixed modifications: Carbamidomethyl (C) (apply to specified residues or [add all](#))

Variable modifications:

**K7** : Propionyl-(13CD3)Methyl (K)**K11** : Propionyl (K)

Ions Score: 31 Expect: 0.26

Matches : 18/110 fragment ions using 26 most intense peaks [\(help\)](#)

| #  | b                | b <sup>++</sup> | b*               | b <sup>++</sup> | b <sup>0</sup> | b <sup>0++</sup> | Seq. | y                | y <sup>++</sup> | y*               | y <sup>++</sup> | y <sup>0</sup> | y <sup>0++</sup> | #  |
|----|------------------|-----------------|------------------|-----------------|----------------|------------------|------|------------------|-----------------|------------------|-----------------|----------------|------------------|----|
| 1  | 88.0393          | 44.5233         |                  |                 | 70.0287        | 35.5180          | S    |                  |                 |                  |                 |                |                  | 13 |
| 2  | 175.0713         | 88.0393         |                  |                 | 157.0608       | 79.0340          | S    | <b>1435.8765</b> | 718.4419        | 1418.8499        | 709.9286        | 1417.8659      | 709.4366         | 12 |
| 3  | <b>232.0928</b>  | 116.5500        |                  |                 | 214.0822       | 107.5448         | G    | <b>1348.8445</b> | 674.9259        | <b>1331.8179</b> | 666.4126        |                |                  | 11 |
| 4  | 303.1299         | 152.0686        |                  |                 | 285.1193       | 143.0633         | A    | <b>1291.8230</b> | 646.4151        | 1274.7964        | 637.9019        |                |                  | 10 |
| 5  | <b>416.2140</b>  | 208.6106        |                  |                 | 398.2034       | 199.6053         | L    | 1220.7859        | 610.8968        | 1203.7593        | 602.3833        |                |                  | 9  |
| 6  | 553.2729         | 277.1401        |                  |                 | 535.2623       | 268.1348         | H    | <b>1107.7018</b> | 554.3545        | 1090.6753        | 545.8413        |                |                  | 8  |
| 7  | 755.4319         | 378.2196        | 738.4054         | <b>369.7063</b> | 737.4213       | <b>369.2143</b>  | K    | <b>970.6429</b>  | 485.8251        | 953.6163         | 477.3118        |                |                  | 7  |
| 8  | 911.5330         | 456.2701        | 894.5065         | 447.7569        | 893.5224       | 447.2649         | R    | 768.4839         | 384.7456        | 751.4573         | 376.2323        |                |                  | 6  |
| 9  | 1010.6014        | 505.8044        | 993.5749         | 497.2911        | 992.5909       | <b>496.7991</b>  | V    | 612.3828         | 306.6950        | 595.3562         | 298.1817        |                |                  | 5  |
| 10 | <b>1107.6542</b> | 554.3307        | 1090.6276        | 545.8175        | 1089.6436      | 545.3254         | P    | 513.3144         | 257.1608        | <b>496.2878</b>  | 248.6475        |                |                  | 4  |
| 11 | <b>1291.7754</b> | 646.3913        | 1274.7488        | 637.8780        | 1273.7648      | 637.3860         | K    | <b>416.2616</b>  | 208.6344        | 399.2350         | 200.1212        |                |                  | 3  |
| 12 | <b>1348.7968</b> | 674.9021        | <b>1331.7703</b> | 666.3888        | 1330.7863      | 665.8968         | G    | <b>232.1404</b>  | 116.5738        | 215.1139         | 108.0606        |                |                  | 2  |
| 13 |                  |                 |                  |                 |                |                  | R    | 175.1190         | 88.0631         | 158.0924         | 79.5498         |                |                  | 1  |

MS/MS Fragmentation of **LAGGAAIKGGR**

Found in **014979**, Heterogeneous nuclear ribonucleoprotein D-like OS=Homo sapiens GN=HNRPDL PE=1 SV=3

Match to Query 2226: 1043.634608 from(522.824580,2+) intensity(7091.7891)

Title: File440 Spectrum6881 scans: 8006

Data file \\192.168.1.104\public\raw data\Elite\_01\methylation\_ZW\SW620\2013-6-5-SW620-Kpropio-methyl-IP-Fr11-ZW.mgf

Click mouse within plot area to zoom in by factor of two about that point

Or,   to  Da

Label all possible matches  Label matches used for scoring

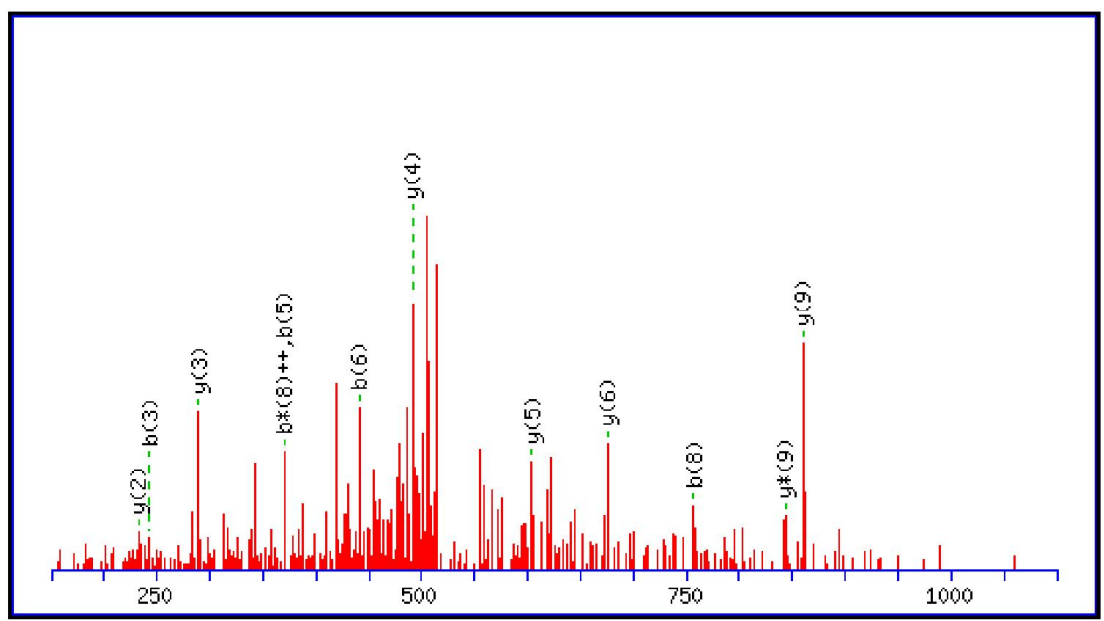

**Monoisotopic mass of neutral peptide Mr(calc):** 1043.6360  
**Fixed modifications:** Carbamidomethyl (C) (apply to specified residues or  
**Variable modifications:**  
**K8** : Propionyl-(13CD3)Methyl (K)  
**Ions Score:** 31 **Expect:** 0.19  
**Matches :** 12/66 fragment ions using 26 most intense peaks ([help](#))

| #  | b               | b <sup>++</sup> | b*       | b <sup>*++</sup> | Seq. | y               | y <sup>++</sup> | y*              | y <sup>*++</sup> | #  |
|----|-----------------|-----------------|----------|------------------|------|-----------------|-----------------|-----------------|------------------|----|
| 1  | 114.0913        | 27.5493         |          |                  | L    |                 |                 |                 |                  | 11 |
| 2  | 185.1285        | 93.0679         |          |                  | A    | 931.5592        | 466.2833        | 914.5327        | 457.7700         | 10 |
| 3  | <b>242.1499</b> | 121.5786        |          |                  | G    | <b>860.5221</b> | 430.7647        | <b>843.4956</b> | 422.2514         | 9  |
| 4  | 299.1714        | 150.0893        |          |                  | G    | 803.5006        | 402.2540        | 786.4741        | 393.7407         | 8  |
| 5  | <b>370.2085</b> | 185.6079        |          |                  | A    | 746.4792        | 373.7432        | 729.4526        | 365.2300         | 7  |
| 6  | <b>441.2456</b> | 221.1264        |          |                  | A    | <b>675.4421</b> | 338.2247        | 658.4155        | 329.7114         | 6  |
| 7  | 554.3297        | 277.6685        |          |                  | I    | <b>604.4050</b> | 302.7061        | 587.3784        | 294.1928         | 5  |
| 8  | <b>756.4887</b> | 378.7480        | 739.4621 | <b>370.2347</b>  | K    | <b>491.3209</b> | 246.1641        | 474.2943        | 237.6508         | 4  |
| 9  | 813.5102        | 407.2587        | 796.4836 | 398.7454         | G    | <b>289.1619</b> | 145.0846        | 272.1353        | 136.5713         | 3  |
| 10 | 870.5316        | 435.7694        | 853.5051 | 427.2562         | G    | <b>232.1404</b> | 116.5738        | 215.1139        | 108.0606         | 2  |
| 11 |                 |                 |          |                  | R    | 175.1190        | 88.0631         | 158.0924        | 79.5498          | 1  |

MS/MS Fragmentation of **LGLKMANEAAAKNR**

Found in **Q96DF8**, Protein DGCR14 OS=Homo sapiens GN=DGCR14 PE=1 SV=1

Match to Query 8719: 1619.919768 from(810.967160, 2+) intensity(25497.2539)

Title: File388 Spectrum11636 scans: 13203

Data file \\192.168.1.104\public\raw data\Elite\_01\methylation\_ZW\SW620\2013-5-16-620-Kpropio-methyl-IP-Fr16-ZW.mgf

Click mouse within plot area to zoom in by factor of two about that point

Or,   to  Da

Label all possible matches  Label matches used for scoring

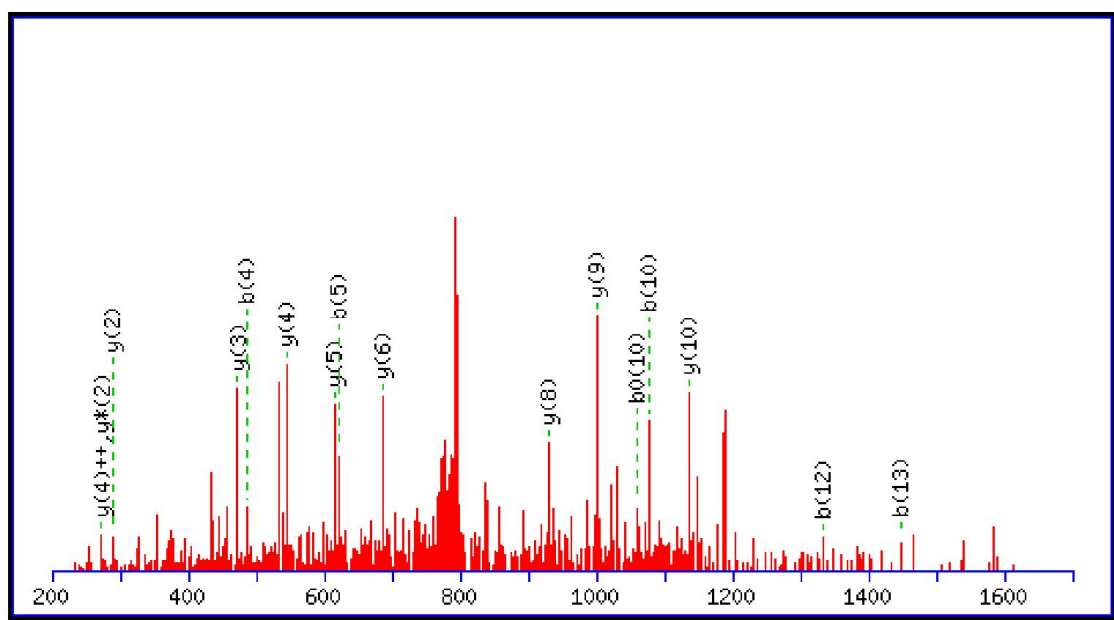

**Monoisotopic mass of neutral peptide Mr(calc):** 1619.9210

**Fixed modifications:** Carbamidomethyl (C) (apply to specified residues or

**Variable modifications:**

**K4** : Propionyl-(13CD3)Methyl (K)

**M5** : Label:13C(1)2H(3) (M)

**K12** : Propionyl (K)

**Ions Score:** 31 **Expect:** 0.4

**Matches** : 16/124 fragment ions using 42 most intense peaks [\(help\)](#)

| #  | b                | b <sup>++</sup> | b <sup>+</sup> | b <sup>++</sup> | b <sup>0</sup>   | b <sup>0++</sup> | Seq. | y                | y <sup>++</sup> | y <sup>+</sup>  | y <sup>++</sup> | y <sup>0</sup> | y <sup>0++</sup> | #  |
|----|------------------|-----------------|----------------|-----------------|------------------|------------------|------|------------------|-----------------|-----------------|-----------------|----------------|------------------|----|
| 1  | 114.0913         | 57.5493         |                |                 |                  |                  | L    |                  |                 |                 |                 |                |                  | 14 |
| 2  | 171.1128         | 85.0600         |                |                 |                  |                  | G    | 1507.8442        | 754.4258        | 1490.8177       | 745.9125        | 1489.8337      | 745.4205         | 13 |
| 3  | 284.1969         | 142.6021        |                |                 |                  |                  | L    | 1450.8228        | 725.9150        | 1433.7962       | 717.4018        | 1432.8122      | 716.9097         | 12 |
| 4  | <b>486.3559</b>  | 243.6816        | 469.3293       | 235.1683        |                  |                  | K    | 1337.7387        | 669.3730        | 1320.7122       | 660.8597        | 1319.7282      | 660.3677         | 11 |
| 5  | <b>621.4186</b>  | 311.2129        | 604.3920       | 302.6996        |                  |                  | N    | <b>1135.5797</b> | 568.2935        | 1118.5532       | 559.7802        | 1117.5691      | 559.2882         | 10 |
| 6  | 692.4557         | 346.7315        | 675.4291       | 338.2182        |                  |                  | A    | <b>1008.5178</b> | 500.7622        | 983.4905        | 492.2489        | 982.5065       | 491.7569         | 9  |
| 7  | 806.4986         | 403.7529        | 789.4720       | 395.2397        |                  |                  | N    | <b>929.4799</b>  | 465.2436        | 912.4534        | 456.7303        | 911.4694       | 456.2383         | 8  |
| 8  | 935.5412         | 468.2742        | 918.5146       | 459.7610        | 917.5306         | 459.2689         | E    | 815.4370         | 408.2221        | 798.4104        | 399.7089        | 797.4264       | 399.2169         | 7  |
| 9  | 1006.5783        | 503.7928        | 989.5517       | 495.2795        | 988.5677         | 494.7875         | A    | <b>686.3944</b>  | 343.7008        | 669.3678        | 335.1876        |                |                  | 6  |
| 10 | <b>1077.6154</b> | 539.3113        | 1060.5889      | 530.7981        | <b>1059.6048</b> | 530.3061         | A    | <b>615.3573</b>  | 308.1823        | 598.3307        | 299.6690        |                |                  | 5  |
| 11 | 1148.6525        | 574.8299        | 1131.6260      | 566.3166        | 1130.6420        | 565.8246         | A    | <b>544.3202</b>  | <b>272.6637</b> | 527.2936        | 264.1504        |                |                  | 4  |
| 12 | <b>1332.7737</b> | 666.8905        | 1315.7472      | 658.3772        | 1314.7631        | 657.8852         | K    | <b>473.2831</b>  | 237.1452        | 456.2565        | 228.6319        |                |                  | 3  |
| 13 | <b>1446.8166</b> | 723.9120        | 1429.7901      | 715.3987        | 1428.8061        | 714.9067         | N    | <b>289.1679</b>  | 145.0846        | <b>272.1353</b> | 136.5713        |                |                  | 2  |
| 14 |                  |                 |                |                 |                  |                  | R    | 175.1190         | 88.0631         | 158.0924        | 79.5498         |                |                  | 1  |

Found in **B4DJ58**, Ribosomal L1 domain-containing protein 1 OS=Homo sapiens GN=RSL1D1 PE=2 SV=1

Match to Query 4807: 1311.698208 from(656.856380, 2+) intensity(215553.1875)

Title: File440 Spectrum11498 scans: 12950

Data file \\192.168.1.104\public\raw data\Elite\_01\methylation\_ZW\SW620\2013-6-5-SW620-Kpropio-methyl-IP-Fr11-ZW.mgf

Click mouse within plot area to zoom in by factor of two about that point

Or,   to  Da Label all possible matches  Label matches used for scoring 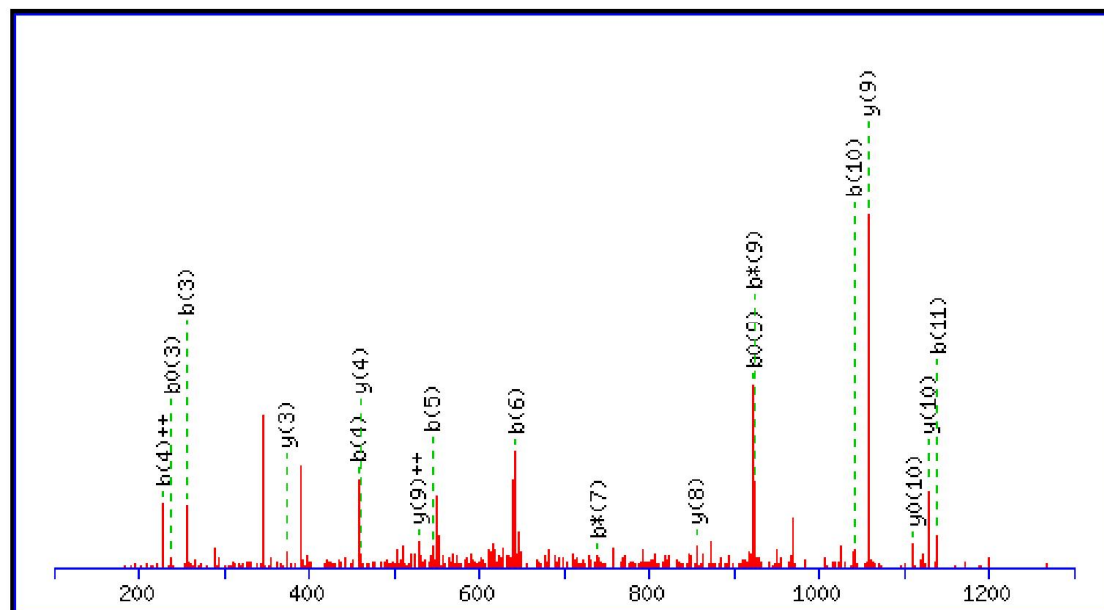**Monoisotopic mass of neutral peptide Mr(calc):** 1311.7055**Fixed modifications:** Carbamidomethyl (C) (apply to specified residues or termini only)**Variable modifications:****K4** : Propionyl-(13CD3)Methyl (K)**Ions Score:** 31 **Expect:** 0.36**Matches** : 18/122 fragment ions using 44 most intense peaks ([help](#))

| #  | b                | b <sup>++</sup> | b*              | b <sup>+++</sup> | b <sup>0</sup>  | b <sup>0++</sup> | Seq. | y                | y <sup>++</sup> | y*        | y <sup>+++</sup> | y <sup>0</sup>   | y <sup>0++</sup> | #  |
|----|------------------|-----------------|-----------------|------------------|-----------------|------------------|------|------------------|-----------------|-----------|------------------|------------------|------------------|----|
| 1  | 88.0593          | 44.5233         |                 |                  | 70.0287         | 35.5190          | S    |                  |                 |           |                  |                  |                  | 12 |
| 2  | 185.0921         | 93.0497         |                 |                  | 167.0815        | 84.0444          | P    | 1225.6808        | 613.3440        | 1208.6542 | 604.3308         | 1207.6702        | 604.3388         | 11 |
| 3  | <b>256.1293</b>  | 128.5682        |                 |                  | <b>238.1186</b> | 119.5629         | A    | <b>1126.6280</b> | 564.8177        | 1111.6015 | 556.3044         | <b>1110.6175</b> | 555.8124         | 10 |
| 4  | <b>458.2882</b>  | <b>229.6477</b> | 441.2616        | 221.1345         | 440.2776        | 220.6425         | K    | <b>1057.5909</b> | <b>529.2991</b> | 1040.5644 | 520.7858         | 1039.5804        | 520.2938         | 9  |
| 5  | <b>545.3202</b>  | 273.1637        | 528.2937        | 264.6505         | 527.3097        | 264.1585         | S    | <b>855.4319</b>  | 428.2196        | 838.4054  | 419.7063         | 837.4213         | 419.2143         | 8  |
| 6  | <b>642.3730</b>  | 321.6901        | 625.3464        | 313.1769         | 624.3624        | 312.6848         | P    | 768.3999         | 384.7036        | 751.3733  | 376.1903         | 750.3893         | 375.6983         | 7  |
| 7  | 756.4159         | 378.7116        | <b>739.3594</b> | 370.1983         | 738.4053        | 369.7063         | N    | 671.3471         | 336.1772        | 654.3206  | 327.6639         | 653.3365         | 327.1719         | 6  |
| 8  | 853.4687         | 427.2380        | 836.4421        | 418.7247         | 835.4581        | 418.2327         | P    | 557.3042         | 279.1557        | 540.2776  | 270.6425         | 539.2936         | 270.1504         | 5  |
| 9  | 940.5007         | 470.7540        | <b>923.4742</b> | 462.2407         | <b>922.4901</b> | 461.7487         | S    | <b>460.2514</b>  | 230.6293        | 443.2249  | 222.1161         | 442.2409         | 221.6241         | 4  |
| 10 | <b>1041.5484</b> | 521.2778        | 1024.5218       | 512.7646         | 1023.5378       | 512.2725         | T    | <b>373.2194</b>  | 187.1133        | 356.1928  | 178.6001         | 355.2088         | 178.1081         | 3  |
| 11 | <b>1138.6011</b> | 569.8042        | 1121.5746       | 561.2909         | 1120.5906       | 560.7989         | P    | 272.1717         | 136.5895        | 255.1452  | 128.0762         |                  |                  | 2  |
| 12 |                  |                 |                 |                  |                 |                  | R    | 175.1190         | 88.0631         | 158.0924  | 79.5498          |                  |                  | 1  |

Found in **E9PKK0**, 182 kDa tankyrase-1-binding protein OS=Homo sapiens GN=TNKS1BP1 PE=2 SV=1

Match to Query 2973: 1087.614968 from(544.814760,2+) intensity(31439.4707)

Title: File388 Spectrum6427 scans: 7617

Data file \\192.168.1.104\public\raw data\Elite\_01\methylation\_ZW\SW620\2013-5-16-620-Kpropio-methyl-IP-Fr16-ZW.mgf

Click mouse within plot area to zoom in by factor of two about that point

Or,   to  Da Label all possible matches  Label matches used for scoring 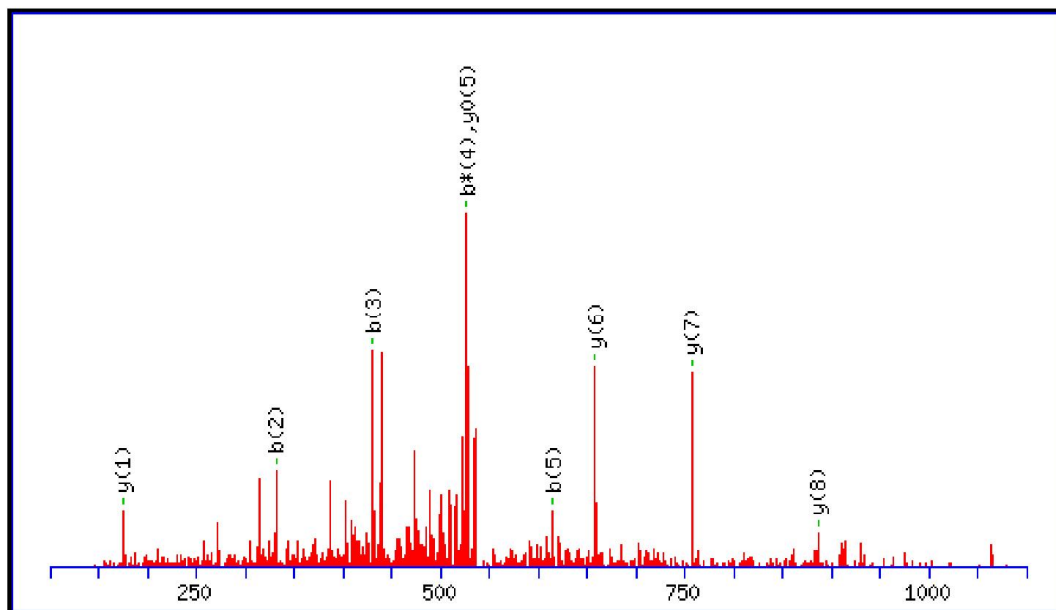**Monoisotopic mass of neutral peptide Mr(calc):** 1087.6146**Fixed modifications:** Carbamidomethyl (C) (apply to specified residues or termini only)**Variable modifications:****K1** : Propionyl-(13CD3)Methyl (K)**Ions Score:** 30 **Expect:** 0.39**Matches** : 9/92 fragment ions using 10 most intense peaks ([help](#))

| # | b               | b <sup>++</sup> | b <sup>*</sup>  | b <sup>+++</sup> | b <sup>0</sup> | b <sup>0++</sup> | Seq.     | y               | y <sup>++</sup> | y <sup>*</sup> | y <sup>+++</sup> | y <sup>0</sup>  | y <sup>0++</sup> | # |
|---|-----------------|-----------------|-----------------|------------------|----------------|------------------|----------|-----------------|-----------------|----------------|------------------|-----------------|------------------|---|
| 1 | 203.1663        | 102.0868        | 186.1397        | 93.5735          |                |                  | <b>K</b> |                 |                 |                |                  |                 |                  | 9 |
| 2 | <b>332.2089</b> | 166.6981        | 315.1823        | 158.0948         | 314.1983       | 157.6028         | <b>E</b> | <b>886.4629</b> | 443.7351        | 869.4363       | 435.2218         | 868.4523        | 434.7298         | 8 |
| 3 | <b>431.2773</b> | 216.1423        | 414.2507        | 207.6290         | 413.2667       | 207.1370         | <b>V</b> | <b>757.4203</b> | 379.2138        | 740.3937       | 370.7005         | 739.4097        | 370.2085         | 7 |
| 4 | 544.3614        | 272.6843        | <b>527.3348</b> | 264.1710         | 526.3508       | 263.6790         | <b>L</b> | <b>658.3519</b> | 329.6796        | 641.3253       | 321.1663         | 640.3413        | 320.6743         | 6 |
| 5 | <b>615.3985</b> | 308.2029        | 598.3719        | 299.4996         | 597.3879       | 299.1976         | <b>A</b> | 545.2678        | 273.1375        | 528.2413       | 264.6243         | <b>527.2572</b> | 264.1323         | 5 |
| 6 | 702.4305        | 351.7189        | 685.4040        | 343.2056         | 684.4199       | 342.7136         | <b>S</b> | 474.2307        | 237.6190        | 457.2041       | 229.1057         | 456.2201        | 228.6137         | 4 |
| 7 | 799.4833        | 400.2453        | 782.4567        | 391.7320         | 781.4727       | 391.2400         | <b>P</b> | 387.1987        | 194.1030        | 370.1721       | 185.5897         | 369.1881        | 185.0977         | 3 |
| 8 | 914.6102        | 457.7537        | 897.4837        | 449.2455         | 896.4996       | 448.7535         | <b>D</b> | 290.1459        | 145.5766        | 273.1193       | 137.0633         | 272.1353        | 136.5713         | 2 |
| 9 |                 |                 |                 |                  |                |                  | <b>R</b> | <b>175.1190</b> | 88.0631         | 158.0924       | 79.5498          |                 |                  | 1 |

MS/MS Fragmentation of **KHLHTHGPR**

Found in **P25490**, Transcriptional repressor protein YY1 OS=Homo sapiens GN=YY1 PE=1 SV=2

Match to Query 3002: 1155.653548 from(578.834050,2+) intensity(4199.0898)

Title: File660 Spectrum373 scans: 902

Data file \\192.168.1.104\public\raw data\Elite\_01\methylation\_ZW\SW620\2013-6-18-SW620-Kpropio-methyl-IP-Fr3-ZW.mgf

Click mouse within plot area to zoom in by factor of two about that point

Or,   to  Da

Label all possible matches  Label matches used for scoring

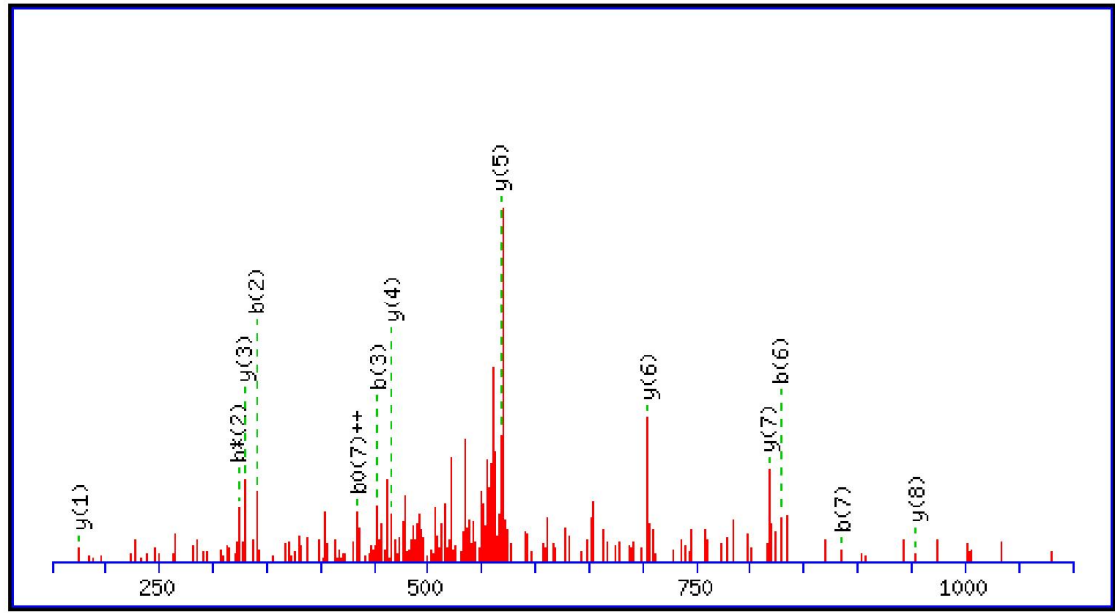

**Monoisotopic mass of neutral peptide Mr(calc):** 1155.6534

**Fixed modifications:** Carbamidomethyl (C) (apply to specified residues or termini only)

**Variable modifications:**

**K1** : Propionyl-(13CD3)Methyl (K)

**Ions Score:** 30 **Expect:** 0.43

**Matches :** 13/80 fragment ions using 45 most intense peaks [\(help\)](#)

| # | b               | b <sup>++</sup> | b <sup>+</sup>  | b <sup>+++</sup> | b <sup>0</sup> | b <sup>0++</sup> | Seq. | y               | y <sup>++</sup> | y <sup>+</sup> | y <sup>+++</sup> | y <sup>0</sup> | y <sup>0++</sup> | # |
|---|-----------------|-----------------|-----------------|------------------|----------------|------------------|------|-----------------|-----------------|----------------|------------------|----------------|------------------|---|
| 1 | 203.1663        | 102.0868        | 186.1397        | 93.5735          |                |                  | K    |                 |                 |                |                  |                |                  | 9 |
| 2 | <b>340.2252</b> | 170.6162        | <b>323.1987</b> | 162.1030         |                |                  | H    | <b>954.5017</b> | 477.7545        | 937.4751       | 469.2412         | 936.4911       | 468.7492         | 8 |
| 3 | <b>453.3093</b> | 227.1583        | 436.2827        | 218.6450         |                |                  | L    | <b>817.4427</b> | 409.2250        | 800.4162       | 400.7117         | 799.4322       | 400.2197         | 7 |
| 4 | 590.3682        | 295.6877        | 573.3416        | 287.1745         |                |                  | H    | <b>704.3587</b> | 352.6830        | 687.3321       | 344.1637         | 686.3481       | 343.6777         | 6 |
| 5 | 691.4159        | 346.2116        | 674.3893        | 337.6983         | 673.4053       | 337.2063         | T    | <b>567.2998</b> | 284.1535        | 550.2732       | 275.6402         | 549.2892       | 275.1482         | 5 |
| 6 | <b>828.4748</b> | 414.7410        | 811.4482        | 406.2277         | 810.4642       | 405.7357         | H    | <b>466.2521</b> | 233.6297        | 449.2255       | 225.1164         |                |                  | 4 |
| 7 | <b>885.4962</b> | 443.2518        | 868.4697        | 434.7385         | 867.4857       | <b>434.2465</b>  | G    | <b>329.1932</b> | 165.1002        | 312.1666       | 156.5870         |                |                  | 3 |
| 8 | 982.5490        | 491.7781        | 965.5224        | 483.2649         | 964.5384       | 482.7729         | P    | 272.1717        | 136.5895        | 256.1452       | 128.0762         |                |                  | 2 |
| 9 |                 |                 |                 |                  |                |                  | R    | <b>175.1190</b> | 88.0631         | 158.0924       | 79.5498          |                |                  | 1 |

MS/MS Fragmentation of **AGGEPWGAKKPR**

Found in **E5RHJ4**, DBIRD complex subunit KIAA1967 (Fragment) OS=Homo sapiens GN=KIAA1967 PE=2 SV=1

Match to Query 6455: 1382.759128 from(692.386840, 2+) intensity(46311.7227)

Title: File394 Spectrum11304 scans: 12692

Data file \\192.168.1.104\public\raw data\Elite\_01\methylation\_ZW\SW620\2013-5-16-620-Kpropio-methyl-IP-Fr8-ZW.mgf

Click mouse within plot area to zoom in by factor of two about that point

Or,   to  Da

Label all possible matches  Label matches used for scoring

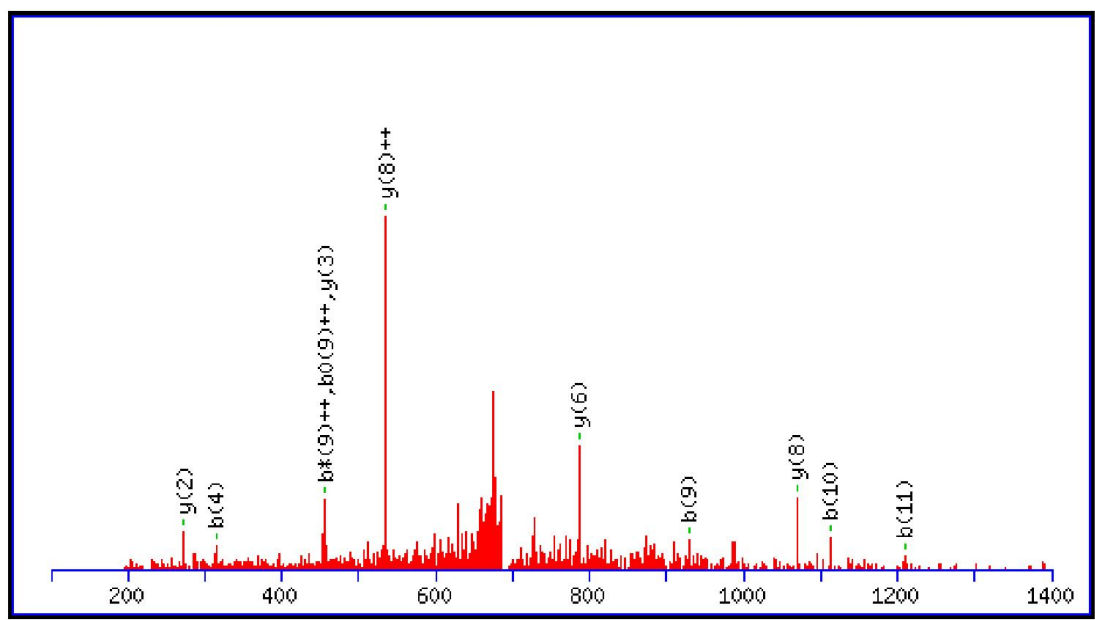

**Monoisotopic mass of neutral peptide Mr(calc): 1382.7579**

**Fixed modifications:** Carbamidomethyl (C) (apply to specified residues or termini only)

**Variable modifications:**

**K9** : Propionyl-(13CD3)Methyl (K)

**K10** : Propionyl (K)

**Ions Score: 29 Expect: 0.55**

**Matches : 11/94 fragment ions using 12 most intense peaks** ([help](#))

| #  | b                | b <sup>++</sup> | b*        | b <sup>0++</sup> | b <sup>0</sup> | b <sup>0++</sup> | Seq. | y                | y <sup>++</sup> | y*        | y <sup>0++</sup> | y <sup>0</sup> | y <sup>0++</sup> | #  |
|----|------------------|-----------------|-----------|------------------|----------------|------------------|------|------------------|-----------------|-----------|------------------|----------------|------------------|----|
| 1  | 72.0444          | 36.5258         |           |                  |                |                  | A    |                  |                 |           |                  |                |                  | 12 |
| 2  | 129.0689         | 65.0386         |           |                  |                |                  | G    | 1312.7281        | 656.3877        | 1236.7015 | 648.3844         | 1294.7175      | 647.9824         | 11 |
| 3  | 186.0873         | 93.5473         |           |                  |                |                  | G    | 1255.7066        | 628.3569        | 1238.6801 | 619.8437         | 1237.6961      | 619.3517         | 10 |
| 4  | <b>315.1299</b>  | 158.0636        |           |                  | 297.1193       | 149.0633         | E    | 1198.6852        | 599.8462        | 1181.6586 | 591.3329         | 1180.6746      | 590.8409         | 9  |
| 5  | 412.1827         | 206.5950        |           |                  | 394.1721       | 197.5897         | P    | <b>1069.6426</b> | <b>535.3249</b> | 1052.6160 | 526.8116         |                |                  | 8  |
| 6  | 538.2620         | 299.6346        |           |                  | 530.2514       | 290.6293         | W    | 972.5898         | 486.7985        | 956.5632  | 478.2853         |                |                  | 7  |
| 7  | 655.2835         | 328.1454        |           |                  | 637.2729       | 319.1401         | G    | <b>786.5105</b>  | 393.7589        | 769.4839  | 385.2456         |                |                  | 6  |
| 8  | 726.3206         | 363.6639        |           |                  | 708.3100       | 354.6586         | A    | 729.4890         | 365.2481        | 712.4625  | 356.7349         |                |                  | 5  |
| 9  | <b>928.4796</b>  | 464.7439        | 911.4530  | <b>456.2302</b>  | 910.4690       | <b>455.7331</b>  | K    | 658.4519         | 329.7296        | 641.4254  | 321.2163         |                |                  | 4  |
| 10 | <b>1112.6908</b> | 556.8040        | 1095.5742 | 548.2907         | 1094.5902      | 547.7937         | K    | <b>456.2929</b>  | 228.6501        | 439.2653  | 220.1368         |                |                  | 3  |
| 11 | <b>1209.6535</b> | 605.3304        | 1192.6270 | 596.8171         | 1191.6430      | 596.3251         | P    | <b>272.1717</b>  | 136.5895        | 255.1452  | 123.0762         |                |                  | 2  |
| 12 |                  |                 |           |                  |                |                  | R    | 175.1190         | 88.0631         | 158.0924  | 79.5498          |                |                  | 1  |



Found in **P54277**, PMS1 protein homolog 1 OS=Homo sapiens GN=PMS1 PE=1 SV=1

Match to Query 11054: 1751.948322 from(584.990050, 3+) intensity(88685.5859)

Title: File386 Spectrum14227 scans: 15755

Data file \\192.168.1.104\public\raw data\Elite\_01\methylation\_ZW\SW620\2013-5-16-620-Kpropio-methyl-IP-Fr14-ZW.mgf

Click mouse within plot area to zoom in by factor of two about that point

Or,   to  Da Label all possible matches  Label matches used for scoring 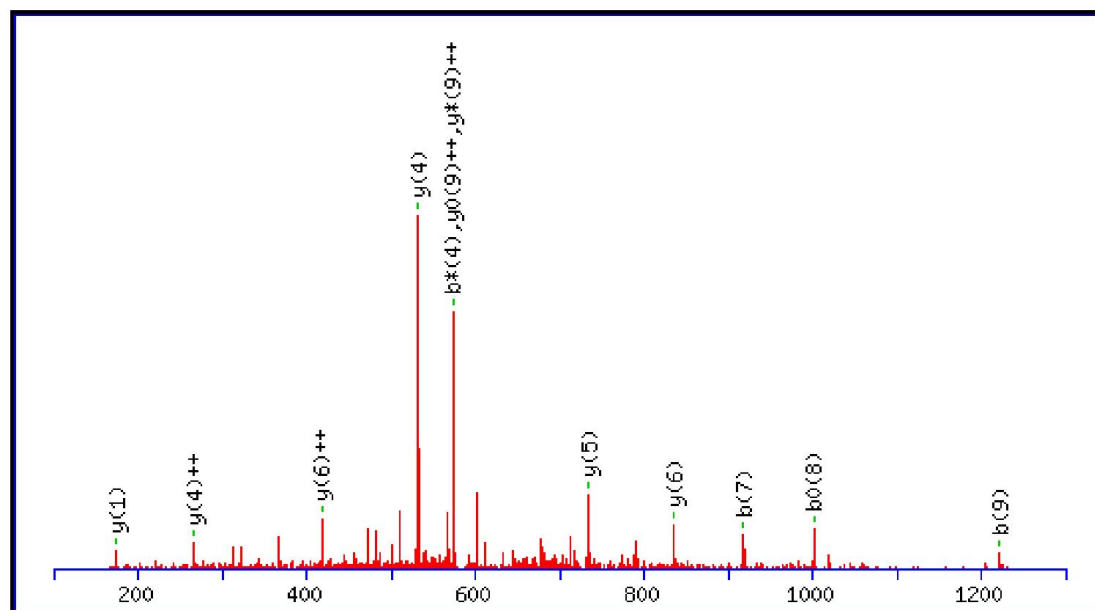**Monoisotopic mass of neutral peptide Mr(cal****Fixed modifications:** Carbamidomethyl (C) (appl**Variable modifications:****K2** : Propionyl (K)**K9** : Propionyl-(13CD3)Methyl (K)**Ions Score:** 29 **Expect:** 0.73**Matches** : 12/134 fragment ions using 11 most int

| #  | b         | b <sup>++</sup> | b*        | b* <sup>++</sup> | b <sup>0</sup> | b <sup>0++</sup> | Seq. | y         | y <sup>++</sup> | y*        | y* <sup>++</sup> | y <sup>0</sup> | y <sup>0++</sup> | #  |
|----|-----------|-----------------|-----------|------------------|----------------|------------------|------|-----------|-----------------|-----------|------------------|----------------|------------------|----|
| 1  | 114.0913  | 57.5493         |           |                  |                |                  | L    |           |                 |           |                  |                |                  | 13 |
| 2  | 298.2125  | 149.6099        | 281.1860  | 141.0966         |                |                  | K    | 1639.8810 | 820.4441        | 1622.8545 | 811.9309         | 1621.8704      | 811.4389         | 12 |
| 3  | 461.2758  | 231.1416        | 444.2493  | 222.6283         |                |                  | Y    | 1455.7598 | 728.3836        | 1438.7333 | 719.8703         | 1437.7493      | 719.3783         | 11 |
| 4  | 590.3184  | 295.6629        | 573.2919  | 287.1496         | 572.3079       | 286.6576         | E    | 1292.6965 | 646.8519        | 1275.6700 | 638.3386         | 1274.6859      | 637.8466         | 10 |
| 5  | 719.3610  | 360.1842        | 702.3345  | 351.6709         | 701.3505       | 351.1789         | E    | 1163.6539 | 582.3306        | 1146.6274 | 573.8173         | 1145.6433      | 573.3253         | 9  |
| 6  | 847.4560  | 424.2316        | 830.4294  | 415.7184         | 829.4454       | 415.2264         | K    | 1034.6113 | 517.8093        | 1017.5848 | 509.2960         | 1016.6008      | 508.8040         | 8  |
| 7  | 918.4931  | 459.7502        | 901.4666  | 451.2369         | 900.4825       | 450.7449         | A    | 906.5164  | 453.7618        | 889.4898  | 445.2485         | 888.5058       | 444.7565         | 7  |
| 8  | 1019.5408 | 510.2740        | 1002.5142 | 501.7608         | 1001.5302      | 501.2688         | T    | 835.4792  | 418.2433        | 818.4527  | 409.7300         | 817.4687       | 409.2380         | 6  |
| 9  | 1221.6998 | 611.3535        | 1204.6733 | 602.8403         | 1203.6892      | 602.3483         | K    | 734.4316  | 367.7194        | 717.4050  | 359.2061         | 716.4210       | 358.7141         | 5  |
| 10 | 1336.7267 | 668.8670        | 1319.7002 | 660.3537         | 1318.7162      | 659.8617         | D    | 532.2726  | 266.6399        | 515.2460  | 258.1266         | 514.2620       | 257.6346         | 4  |
| 11 | 1449.8108 | 725.4090        | 1432.7843 | 716.8958         | 1431.8002      | 716.4038         | L    | 417.2456  | 209.1264        | 400.2191  | 200.6132         | 399.2350       | 200.1212         | 3  |
| 12 | 1578.8534 | 789.9303        | 1561.8269 | 781.4171         | 1560.8428      | 780.9251         | E    | 304.1615  | 152.5844        | 287.1350  | 144.0711         | 286.1510       | 143.5791         | 2  |
| 13 |           |                 |           |                  |                |                  | R    | 175.1190  | 88.0631         | 158.0924  | 79.5498          |                |                  | 1  |

MS/MS Fragmentation of **SAAKQHYLKHSR**Found in **Q9UPZ9**, Serine/threonine-protein kinase ICK OS=Homo sapiens GN=ICK PE=1 SV=1

Match to Query 9041: 1555.858008 from(778.936280, 2+) intensity(28214.5996)

Title: File394 Spectrum5163 scans: 6065

Data file \\192.168.1.104\public\raw data\Elite\_01\methylation\_ZW\SW620\2013-5-16-620-Kpropio-methyl-IP-Fr8-ZW.mgf

Click mouse within plot area to zoom in by factor of two about that point

Or,   to  Da Label all possible matches  Label matches used for scoring 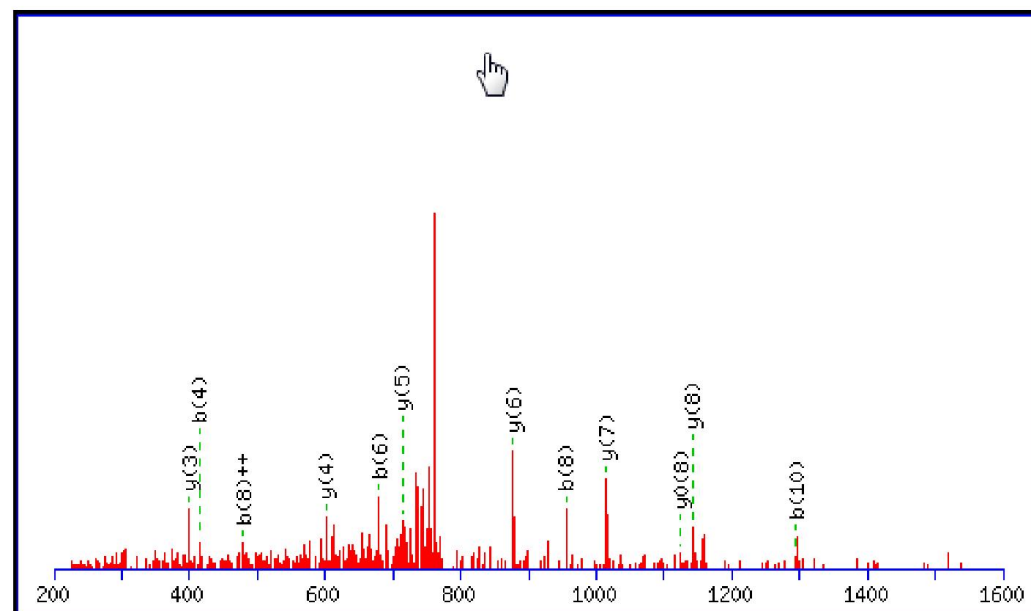**Monoisotopic mass of neutral peptide Mr(calc):** 1554.8539**Fixed modifications:** Carbamidomethyl (C) (apply to specified residues or termini only)**Variable modifications:****K4** : Propionyl (K)**K9** : Propionyl-(13CD3)Methyl (K)**Ions Score:** 29 **Expect:** 0.69**Matches** : 12/124 fragment ions using 27 most intense peaks ([help](#))

| #  | b                | b <sup>++</sup> | b*        | b <sup>++</sup> | b <sup>0</sup> | b <sup>0++</sup> | Seq. | y                | y <sup>++</sup> | y*        | y <sup>++</sup> | y <sup>0</sup>   | y <sup>0++</sup> | #  |
|----|------------------|-----------------|-----------|-----------------|----------------|------------------|------|------------------|-----------------|-----------|-----------------|------------------|------------------|----|
| 1  | 88.0393          | 44.5233         |           |                 | 70.0287        | 35.5180          | S    |                  |                 |           |                 |                  |                  | 12 |
| 2  | 159.0764         | 80.0418         |           |                 | 141.0659       | 71.0366          | A    | 1468.8292        | 734.9182        | 1451.8026 | 726.4050        | 1450.8186        | 725.9130         | 11 |
| 3  | 230.1135         | 115.5604        |           |                 | 212.1030       | 106.5551         | A    | 1397.7921        | 699.3997        | 1380.7655 | 690.8864        | 1379.7815        | 690.3944         | 10 |
| 4  | <b>414.2347</b>  | 207.6210        | 397.2082  | 199.1077        | 396.2241       | 198.6157         | K    | 1326.7550        | 663.8811        | 1309.7284 | 655.3678        | 1308.7444        | 654.8758         | 9  |
| 5  | 542.2933         | 271.6503        | 525.2667  | 263.1370        | 524.2827       | 262.6450         | Q    | <b>1142.6338</b> | 571.8205        | 1125.6072 | 563.3073        | <b>1124.6232</b> | 562.8152         | 8  |
| 6  | <b>679.3522</b>  | 340.1797        | 662.3257  | 331.6665        | 661.3416       | 331.1745         | H    | <b>1014.5752</b> | 507.7912        | 997.5487  | 499.2780        | 996.5646         | 498.7860         | 7  |
| 7  | 842.4155         | 421.7114        | 825.3890  | 413.1981        | 824.4050       | 412.7061         | Y    | <b>877.5163</b>  | 439.2618        | 860.4897  | 430.7485        | 859.5057         | 430.2565         | 6  |
| 8  | <b>955.4996</b>  | <b>478.2534</b> | 938.4730  | 469.7402        | 937.4890       | 469.2482         | L    | <b>714.4530</b>  | 357.7301        | 697.4264  | 349.2168        | 696.4424         | 348.7248         | 5  |
| 9  | 1157.6586        | 579.3329        | 1140.6321 | 570.8197        | 1139.6480      | 570.3277         | K    | <b>601.3689</b>  | 301.1881        | 584.3424  | 292.6748        | 583.3583         | 292.1828         | 4  |
| 10 | <b>1294.7175</b> | 647.8624        | 1277.6910 | 639.3491        | 1276.7070      | 638.8571         | H    | <b>399.2099</b>  | 200.1086        | 382.1833  | 191.5953        | 381.1993         | 191.1033         | 3  |
| 11 | 1381.7495        | 691.3784        | 1364.7230 | 682.8651        | 1363.7390      | 682.3731         | S    | 262.1510         | 131.5791        | 245.1244  | 123.0659        | 244.1404         | 122.5738         | 2  |
| 12 |                  |                 |           |                 |                |                  | R    | 175.1190         | 88.0631         | 158.0924  | 79.5498         |                  |                  |    |

MS/MS Fragmentation of **LKAQKEDDVACSR**

Found in **Q93075**, Putative deoxyribonuclease TATDN2 OS=Homo sapiens GN=TATDN2 PE=1 SV=2

Match to Query 8928: 1648.836148 from(825.425350,2+) intensity(22388.1328)

Title: File386 Spectrum7499 scans: 8557

Data file \\192.168.1.104\public\raw data\Elite\_01\methylation\_ZW\SW620\2013-5-16-620-Kpropio-methyl-IP-Fr14-ZW.mgf

Click mouse within plot area to zoom in by factor of two about that point

Or,   to  Da

Label all possible matches  Label matches used for scoring

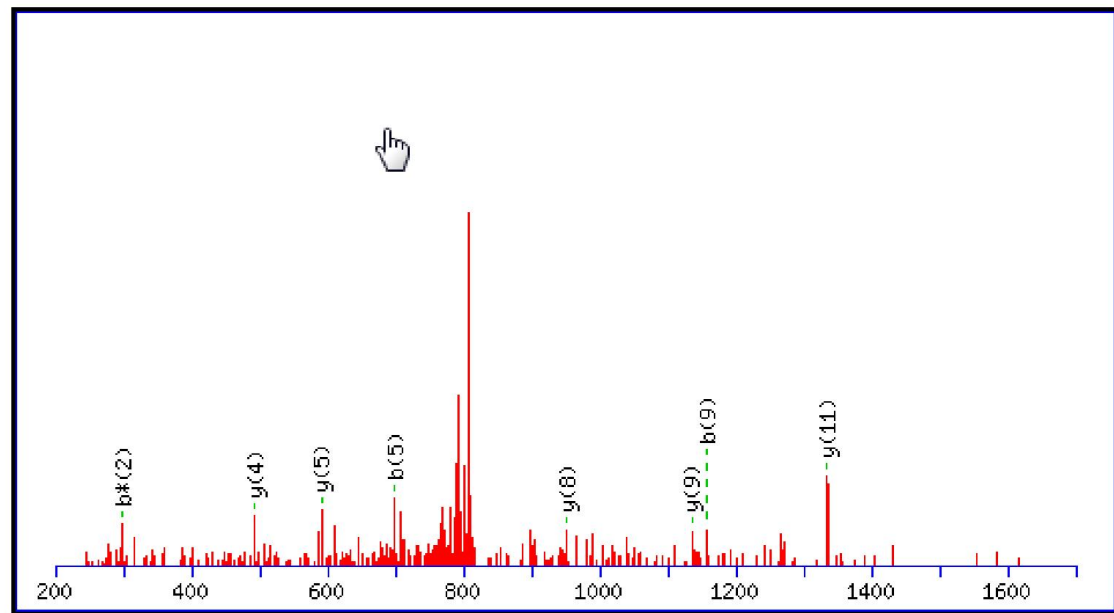

**Monoisotopic mass of neutral peptide Mr(calc): 164**

**Fixed modifications:** Carbamidomethyl (C) (apply to spe

**Variable modifications:**

**K2** : Propionyl-(13CD3)Methyl (K)

**K5** : Propionyl (K)

**Ions Score: 29 Expect: 0.63**

**Matches : 8/130 fragment ions using 13 most intense peak**

| #  | b         | b <sup>++</sup> | b*        | b <sup>+++</sup> | b <sup>0</sup> | b <sup>0++</sup> | Seq. | y         | y <sup>++</sup> | y*        | y <sup>*++</sup> | y <sup>0</sup> | y <sup>0++</sup> | #  |
|----|-----------|-----------------|-----------|------------------|----------------|------------------|------|-----------|-----------------|-----------|------------------|----------------|------------------|----|
| 1  | 114.0913  | 57.5493         |           |                  |                |                  | L    |           |                 |           |                  |                |                  | 13 |
| 2  | 316.2504  | 158.6288        | 299.2238  | 150.1155         |                |                  | K    | 1536.7595 | 768.8834        | 1519.7330 | 760.3701         | 1518.7490      | 759.8781         | 12 |
| 3  | 387.2875  | 194.1474        | 370.2609  | 185.6341         |                |                  | A    | 1334.6005 | 667.8039        | 1317.5740 | 659.2906         | 1316.5899      | 658.7986         | 11 |
| 4  | 515.3460  | 258.1767        | 498.3195  | 249.6634         |                |                  | Q    | 1283.5634 | 632.2853        | 1246.5368 | 623.7721         | 1245.5528      | 623.2801         | 10 |
| 5  | 699.4672  | 350.2372        | 682.4407  | 341.7240         |                |                  | K    | 1135.5048 | 568.2560        | 1118.4783 | 559.7428         | 1117.4942      | 559.2508         | 9  |
| 6  | 828.5098  | 414.7585        | 811.4833  | 406.2453         | 810.4993       | 405.7533         | E    | 951.3836  | 476.1955        | 934.3571  | 467.6822         | 933.3731       | 467.1902         | 8  |
| 7  | 943.5368  | 472.2720        | 926.5102  | 463.7587         | 925.5262       | 463.2667         | D    | 822.3410  | 411.6742        | 805.3145  | 403.1609         | 804.3305       | 402.6689         | 7  |
| 8  | 1058.5637 | 529.7855        | 1041.5372 | 521.2722         | 1040.5531      | 520.7802         | D    | 707.3141  | 354.1607        | 690.2876  | 345.6474         | 689.3035       | 345.1554         | 6  |
| 9  | 1157.6321 | 579.3197        | 1140.6056 | 570.8064         | 1139.6216      | 570.3144         | V    | 592.2872  | 296.6472        | 575.2606  | 288.1339         | 574.2766       | 287.6419         | 5  |
| 10 | 1228.6692 | 614.8383        | 1211.6427 | 606.3250         | 1210.6587      | 605.8330         | A    | 493.2187  | 247.1130        | 476.1922  | 238.5997         | 475.2082       | 238.1077         | 4  |
| 11 | 1388.6999 | 694.8536        | 1371.6733 | 686.3403         | 1370.6893      | 685.8483         | C    | 422.1816  | 211.5945        | 405.1551  | 203.0812         | 404.1711       | 202.5892         | 3  |
| 12 | 1475.7319 | 738.3696        | 1458.7054 | 729.8563         | 1457.7213      | 729.3643         | S    | 282.1510  | 131.5791        | 245.1244  | 123.0659         | 244.1404       | 122.5738         | 2  |
| 13 |           |                 |           |                  |                |                  | R    | 175.1190  | 88.0631         | 158.0924  | 79.5498          |                |                  | 1  |

MS/MS Fragmentation of **IGGKGTAR**Found in **P20290-2**, Isoform 2 of Transcription factor BTF3 OS=Homo sapiens GN=BTF3

Match to Query 619: 832.503828 from(417.259190, 2+) intensity(15790.2529)

Title: File649 Spectrum3146 scans: 3856

Data file \\192.168.1.104\public\raw data\Elite\_01\methylation\_ZW\SW620\2013-6-18-SW620-Kpropio-methyl-IP-Fr20-ZW.mgf

Click mouse within plot area to zoom in by factor of two about that point

Or,   to  Da Label all possible matches  Label matches used for scoring 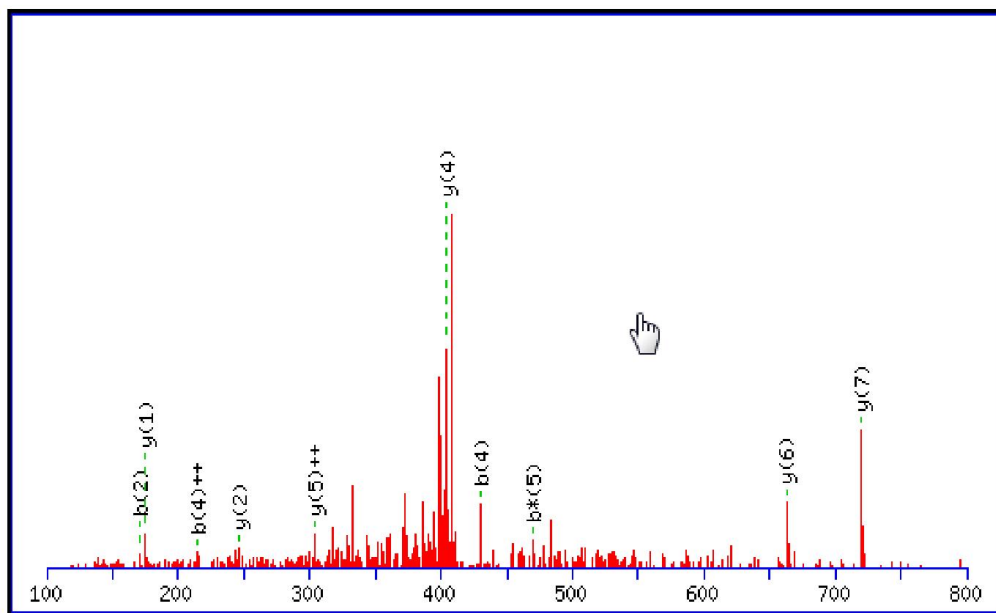**Monoisotopic mass of neutral peptide Mr(calc):** 832.5039**Fixed modifications:** Carbamidomethyl (C) (apply to specified residues or termini only)**Variable modifications:****K4** : Propionyl-(13CD3)Methyl (K)**Ions Score:** 28 **Expect:** 0.41**Matches :** 10/64 fragment ions using 21 most intense peaks[\(help\)](#)

| # | b               | b <sup>++</sup> | b <sup>*</sup>  | b <sup>*++</sup> | b <sup>0</sup> | b <sup>0++</sup> | Seq. | y               | y <sup>++</sup> | y <sup>*</sup> | y <sup>*++</sup> | y <sup>0</sup> | y <sup>0++</sup> | # |
|---|-----------------|-----------------|-----------------|------------------|----------------|------------------|------|-----------------|-----------------|----------------|------------------|----------------|------------------|---|
| 1 | 114.0913        | 57.5493         |                 |                  |                |                  | I    |                 |                 |                |                  |                |                  | 8 |
| 2 | <b>171.1128</b> | 86.0600         |                 |                  |                |                  | G    | <b>720.4272</b> | 360.7172        | 703.4006       | 352.2039         | 702.4166       | 351.7119         | 7 |
| 3 | 228.1343        | 114.5708        |                 |                  |                |                  | G    | <b>663.4057</b> | 332.2065        | 646.3791       | 323.6932         | 645.3951       | 323.2012         | 6 |
| 4 | <b>430.2933</b> | <b>215.6503</b> | 413.2667        | 207.1370         |                |                  | K    | 606.3842        | <b>303.6957</b> | 589.3577       | 295.1825         | 588.3737       | 294.6905         | 5 |
| 5 | 487.3147        | 244.1610        | <b>470.2882</b> | 235.6477         |                |                  | G    | <b>404.2252</b> | 202.6162        | 387.1987       | 194.1030         | 386.2146       | 193.6110         | 4 |
| 6 | 588.3624        | 294.6849        | 571.3359        | 286.1716         | 570.3519       | 285.6796         | T    | 347.2037        | 174.1055        | 330.1772       | 165.5922         | 329.1932       | 165.1002         | 3 |
| 7 | 659.3995        | 330.2034        | 642.3730        | 321.6901         | 641.3890       | 321.1981         | A    | <b>246.1561</b> | 123.5817        | 229.1295       | 115.0684         |                |                  | 2 |
| 8 |                 |                 |                 |                  |                |                  | R    | <b>175.1190</b> | 88.0631         | 153.0924       | 79.5498          |                |                  | 1 |

Found in **Q9BW04**, Specifically androgen-regulated gene protein OS=Homo sapiens GN=SARG PE=1 SV=2

Match to Query 6945: 1480.923672 from(494.648500, 3+) intensity(42679.0820)

Title: File671 Spectrum12897 scans: 14294

Data file \\192.168.1.104\public\raw data\Elite\_01\methylation\_ZW\SW620\2013-6-18-SW620-Kpropio-methyl-IP-Fr5-ZW.mgf

Click mouse within plot area to zoom in by factor of two about that point

Or,   to  Da Label all possible matches  Label matches used for scoring 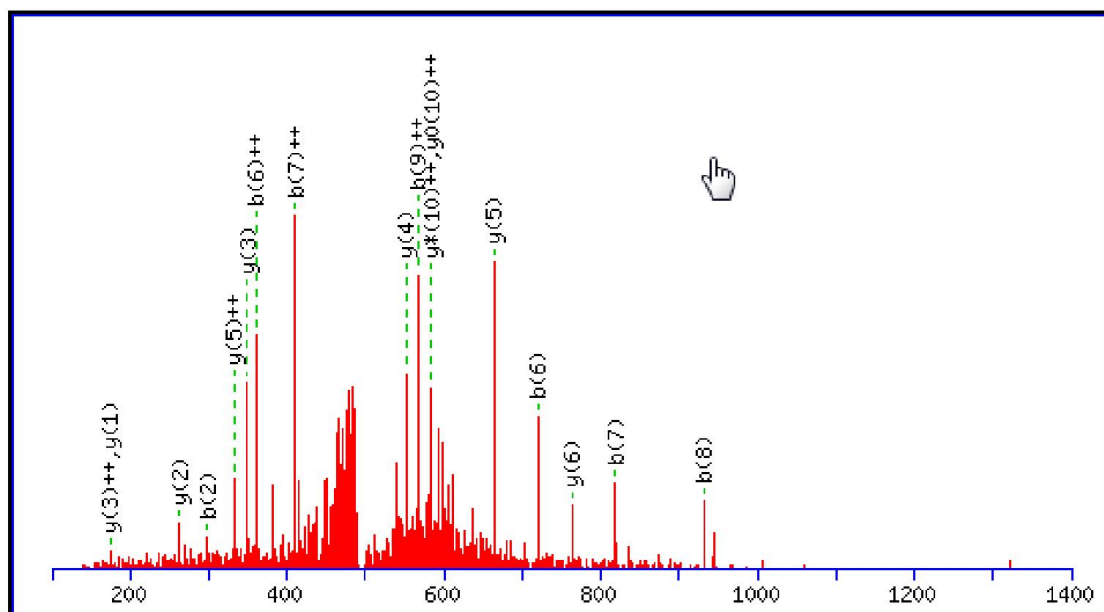Monoisotopic mass of neutral peptide  $M_r(\text{calc})$ 

Fixed modifications: Carbamidomethyl (C) (apply

Variable modifications:

K1 : Propionyl (K)

K9 : Propionyl-(13CD3)Methyl (K)

Ions Score: 28 Expect: 0.17

Matches : 17/112 fragment ions using 29 most inten

| #  | b               | b <sup>++</sup> | b <sup>+</sup> | b <sup>*++</sup> | b <sup>0</sup> | b <sup>0++</sup> | Seq. | y               | y <sup>++</sup> | y <sup>+</sup> | y <sup>*++</sup> | y <sup>0</sup> | y <sup>0++</sup> | #  |
|----|-----------------|-----------------|----------------|------------------|----------------|------------------|------|-----------------|-----------------|----------------|------------------|----------------|------------------|----|
| 1  | 185.1285        | 93.0679         | 168.1019       | 84.5546          |                |                  | K    |                 |                 |                |                  |                |                  | 12 |
| 2  | <b>298.2125</b> | 149.6099        | 281.1360       | 141.0966         |                |                  | L    | 1297.8111       | 649.4092        | 1230.7845      | 640.8959         | 1279.3005      | 640.4039         | 11 |
| 3  | 395.2653        | 198.1363        | 378.2387       | 189.6230         |                |                  | P    | 1184.7270       | 592.8671        | 1167.7005      | <b>584.3539</b>  | 1166.7165      | <b>583.8619</b>  | 10 |
| 4  | 492.3180        | 246.6627        | 475.2915       | 238.1494         |                |                  | P    | 1087.6743       | 544.3408        | 1070.6477      | 535.8275         | 1069.6637      | 535.3355         | 9  |
| 5  | 606.3610        | 303.6841        | 589.3344       | 295.1709         |                |                  | N    | 990.6215        | 495.8144        | 973.5949       | 487.3011         | 972.6109       | 486.8091         | 8  |
| 6  | <b>719.4450</b> | <b>360.2262</b> | 702.4185       | 351.7129         |                |                  | I    | 876.5786        | 438.7929        | 859.5520       | 430.2796         | 858.5680       | 429.7876         | 7  |
| 7  | <b>818.5135</b> | <b>409.7604</b> | 801.4869       | 401.2471         |                |                  | V    | <b>763.4945</b> | 382.2509        | 746.4680       | 373.7376         | 745.4839       | 373.2456         | 6  |
| 8  | <b>931.5975</b> | 466.3024        | 914.5710       | 457.7891         |                |                  | L    | <b>664.4261</b> | <b>332.7167</b> | 647.3995       | 324.2034         | 646.4155       | 323.7114         | 5  |
| 9  | 1133.7565       | <b>567.3819</b> | 1116.7300      | 558.8686         |                |                  | K    | <b>551.3420</b> | 276.1746        | 534.3155       | 267.6614         | 533.3315       | 267.1694         | 4  |
| 10 | 1220.7886       | 610.8979        | 1203.7620      | 602.3846         | 1202.7780      | 601.8926         | S    | <b>349.1830</b> | <b>175.0951</b> | 332.1565       | 166.5819         | 331.1724       | 166.0899         | 3  |
| 11 | 1307.8206       | 654.4139        | 1290.7940      | 645.9007         | 1289.8100      | 645.4086         | S    | <b>262.1510</b> | 131.5791        | 245.1244       | 123.0659         | 244.1404       | 122.5738         | 2  |
| 12 |                 |                 |                |                  |                |                  | R    | <b>175.1190</b> | 88.0631         | 158.0924       | 79.5498          |                |                  | 1  |

MS/MS Fragmentation of **MHILKGSPNVIPR**

Found in **J3KPA2**, TM2 domain containing 1, isoform CRA\_c OS=Homo sapiens GN=TM2D1 PE=4 SV=1

Match to Query 9200: 1538.919408 from(770.466980,2+) intensity(488869.7813)

Title: File392 Spectrum20433 scans: 22592

Data file \\192.168.1.104\public\raw data\Elite\_01\methylation\_ZW\SW620\2013-5-16-620-Kpropio-methyl-IP-Fr6-ZW.mgf

Click mouse within plot area to zoom in by factor of two about that point

Or,   to  Da

Label all possible matches  Label matches used for scoring

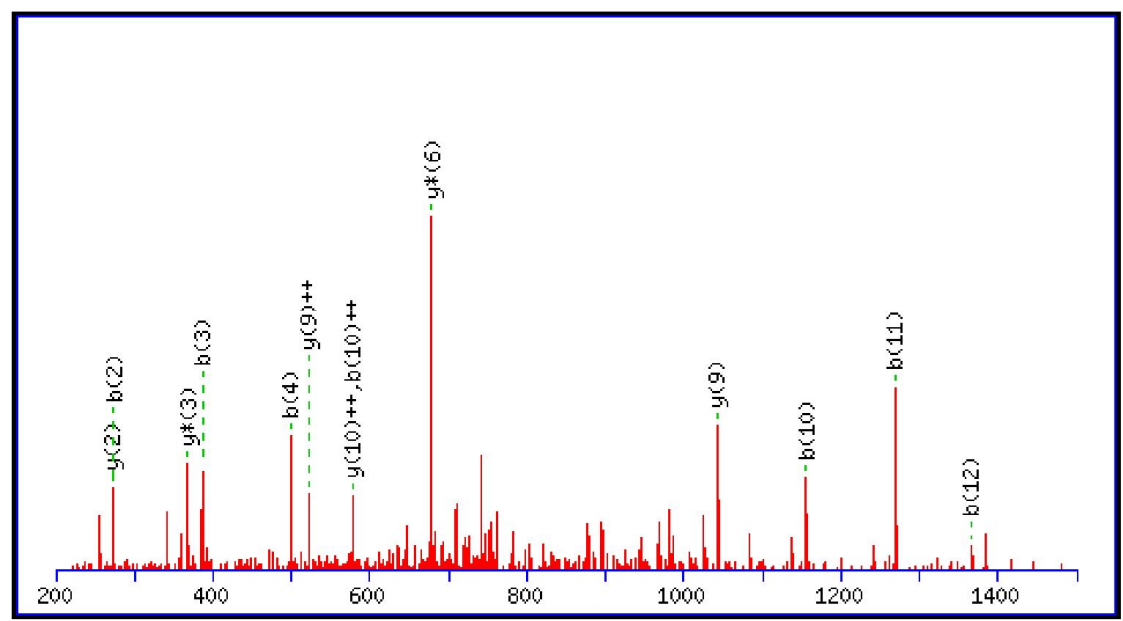

**Monoisotopic mass of neutral peptide Mr(calc):** 1538.91  
**Fixed modifications:** Carbamidomethyl (C) (apply to specific...)  
**Variable modifications:**  
**M1** : Label:13C(1)2H(3) (M)  
**K5** : Propionyl-(13CD3)Methyl (K)  
**Ions Score:** 28 **Expect:** 0.44  
**Matches :** 13/112 fragment ions using 26 most intense peaks

| #  | b                | b <sup>++</sup> | b <sup>+</sup> | b <sup>+++</sup> | b <sup>0</sup> | b <sup>0++</sup> | Seq.     | y                | y <sup>++</sup> | y <sup>*</sup>  | y <sup>+++</sup> | y <sup>0</sup> | y <sup>0++</sup> | #         |
|----|------------------|-----------------|----------------|------------------|----------------|------------------|----------|------------------|-----------------|-----------------|------------------|----------------|------------------|-----------|
| 1  | 136.0699         | 68.5386         |                |                  |                |                  | <b>H</b> |                  |                 |                 |                  |                |                  | <b>13</b> |
| 2  | <b>273.1289</b>  | 137.0681        |                |                  |                |                  | <b>H</b> | 1404.8594        | 702.9334        | 1387.8329       | 694.4201         | 1386.8489      | 693.9281         | <b>12</b> |
| 3  | <b>386.2129</b>  | 193.6101        |                |                  |                |                  | <b>I</b> | 1267.8005        | 634.4039        | 1250.7740       | 625.8906         | 1249.7900      | 625.3986         | <b>11</b> |
| 4  | <b>499.2970</b>  | 250.1521        |                |                  |                |                  | <b>L</b> | 1154.7165        | <b>577.8619</b> | 1137.6899       | 569.3486         | 1136.7059      | 568.8566         | <b>10</b> |
| 5  | 701.4560         | 351.2316        | 684.4294       | 342.7184         |                |                  | <b>K</b> | <b>1041.6324</b> | <b>521.3198</b> | 1024.6058       | 512.8066         | 1023.6218      | 512.3146         | <b>9</b>  |
| 6  | 758.4775         | 379.7424        | 741.4509       | 371.2291         |                |                  | <b>G</b> | 839.4734         | 420.2403        | 822.4468        | 411.7271         | 821.4628       | 411.2350         | <b>8</b>  |
| 7  | 845.5095         | 423.2584        | 828.4829       | 414.7451         | 827.4989       | 414.2531         | <b>S</b> | 782.4519         | 391.7296        | 765.4254        | 383.2163         | 764.4413       | 382.7243         | <b>7</b>  |
| 8  | 942.5623         | 471.7848        | 925.5357       | 463.2715         | 924.5517       | 462.7795         | <b>P</b> | 695.4199         | 348.2136        | <b>678.3933</b> | 339.7003         |                |                  | <b>6</b>  |
| 9  | 1056.6052        | 528.8062        | 1039.5785      | 520.2930         | 1038.5946      | 519.8009         | <b>N</b> | 598.3671         | 299.6872        | 581.3406        | 291.1739         |                |                  | <b>5</b>  |
| 10 | <b>1155.6736</b> | <b>578.3404</b> | 1138.6470      | 569.8272         | 1137.6630      | 569.3352         | <b>V</b> | 484.3242         | 242.6657        | 467.2976        | 234.1525         |                |                  | <b>4</b>  |
| 11 | <b>1268.7577</b> | 634.8825        | 1251.7311      | 626.3692         | 1250.7471      | 625.8772         | <b>I</b> | 385.2558         | 193.1315        | <b>368.2292</b> | 184.6183         |                |                  | <b>3</b>  |
| 12 | <b>1365.8104</b> | 683.4089        | 1348.7839      | 674.8956         | 1347.7999      | 674.4036         | <b>P</b> | <b>272.1717</b>  | 136.5895        | 255.1452        | 128.0762         |                |                  | <b>2</b>  |
| 13 |                  |                 |                |                  |                |                  | <b>R</b> | 175.1190         | 88.0631         | 158.0924        | 79.5498          |                |                  | <b>1</b>  |

Found in **HOY4X3**, RNA-binding protein 39 (Fragment) OS=Homo sapiens GN=RBM39 PE=4 SV=1

Match to Query 8528: 1606.913308 from(804.463930, 2+) intensity(38880.4023)

Title: File388 Spectrum11051 scans: 12579

Data file \\192.168.1.104\public\raw data\Elite\_01\methylation\_ZW\SW620\2013-5-16-620-Kpropio-methyl-IP-Fr16-ZW.mgf

Click mouse within plot area to zoom in by factor of two about that point

Or,   to  Da Label all possible matches  Label matches used for scoring 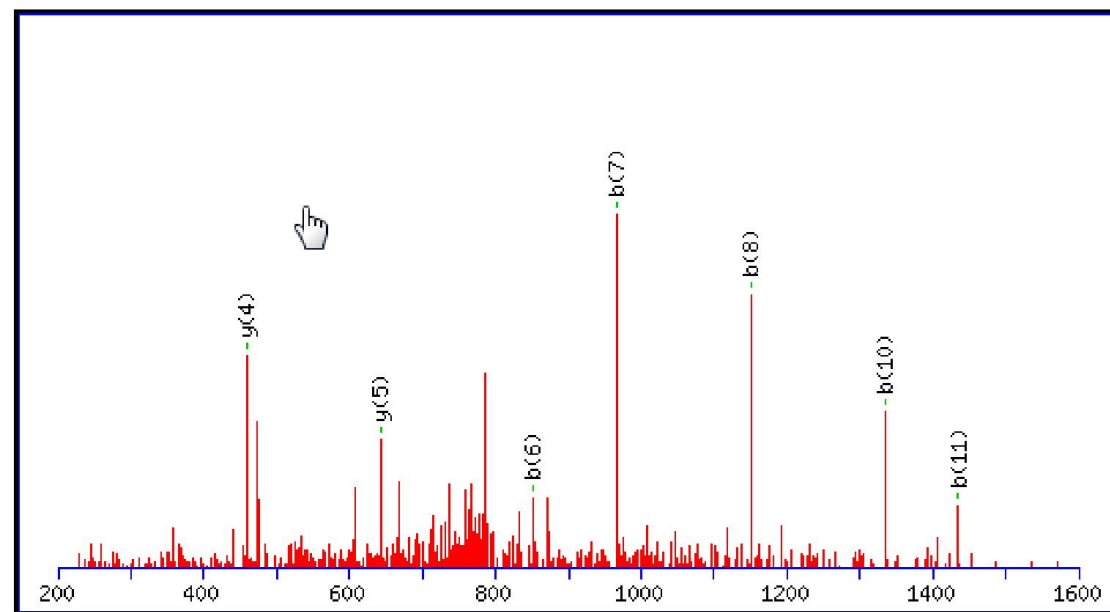Monoisotopic mass of neutral peptide  $M_r(\text{calc})$ : 1606.9224

Fixed modifications: Carbamidomethyl (C) (apply to s

Variable modifications:

N-term : Propionyl-(13CD3)Methyl (Protein N-term)

K6 : Propionyl-(13CD3)Methyl (K)

K8 : Propionyl (K)

Ions Score: 27 Expect: 0.8

Matches : 7/118 fragment ions using 14 most intense pe

| #  | b                | b <sup>++</sup> | b*        | b <sup>++</sup> | b <sup>0</sup> | b <sup>0++</sup> | Seq. | y               | y <sup>++</sup> | y*        | y <sup>++</sup> | y <sup>0</sup> | y <sup>0++</sup> | #  |
|----|------------------|-----------------|-----------|-----------------|----------------|------------------|------|-----------------|-----------------|-----------|-----------------|----------------|------------------|----|
| 1  | 162.1034         | 81.5553         |           |                 | 144.0928       | 72.5500          | S    |                 |                 |           |                 |                |                  | 12 |
| 2  | 249.1354         | 125.0713        |           |                 | 231.1248       | 116.0660         | S    | 1446.8336       | 723.9204        | 1429.8071 | 715.4072        | 1428.8230      | 714.9152         | 11 |
| 3  | 346.1881         | 173.5977        |           |                 | 328.1776       | 164.5924         | P    | 1359.8016       | 680.4044        | 1342.7750 | 671.8912        | 1341.7910      | 671.3991         | 10 |
| 4  | 493.2566         | 247.1319        |           |                 | 475.2460       | 238.1266         | F    | 1262.7488       | 631.8780        | 1245.7223 | 623.3648        | 1244.7383      | 622.8728         | 9  |
| 5  | 649.3577         | 325.1825        | 632.3311  | 316.6692        | 631.3471       | 316.1772         | R    | 1115.6804       | 558.3438        | 1098.6539 | 549.8306        | 1097.6698      | 549.3386         | 8  |
| 6  | <b>851.5167</b>  | 426.2620        | 834.4901  | 417.7487        | 833.5061       | 417.2567         | K    | 959.5793        | 480.2933        | 942.5527  | 471.7800        | 941.5687       | 471.2880         | 7  |
| 7  | <b>966.5436</b>  | 483.7755        | 949.5171  | 475.2622        | 948.5831       | 474.7702         | D    | 757.4203        | 379.2138        | 740.3937  | 370.7005        | 739.4097       | 370.2085         | 6  |
| 8  | <b>1150.6648</b> | 575.8360        | 1133.6383 | 567.3228        | 1132.6542      | 566.8308         | K    | <b>642.3933</b> | 321.7003        | 625.3668  | 313.1870        | 624.3828       | 312.6950         | 5  |
| 9  | 1237.6968        | 619.3521        | 1220.6703 | 610.8388        | 1219.6863      | 610.3468         | S    | <b>458.2722</b> | 229.6397        | 441.2456  | 221.1264        | 440.2616       | 220.6344         | 4  |
| 10 | <b>1334.7496</b> | 667.8784        | 1317.7230 | 659.3652        | 1316.7390      | 658.8732         | P    | 371.2401        | 186.1237        | 354.2136  | 177.6104        |                |                  | 3  |
| 11 | <b>1433.8180</b> | 717.4126        | 1416.7915 | 708.8994        | 1415.8074      | 708.4074         | V    | 274.1874        | 137.5973        | 257.1608  | 129.0840        |                |                  | 2  |
| 12 |                  |                 |           |                 |                |                  | R    | 175.1190        | 88.0631         | 158.0924  | 79.5498         |                |                  | 1  |

MS/MS Fragmentation of **VLEDGKQVQVVLQER**Found in **E9PB70**, Kinesin-like protein KIF2A OS=Homo sapiens GN=KIF2A PE=2 SV=1

Match to Query 13898: 1998.088572 from(667.036800, 3+) intensity(7883.1938)

Title: File669 Spectrum7002 scans: 8134

Data file \\192.168.1.104\public\raw data\Elite\_01\methylation\_ZW\SW620\2013-6-18-SW620-Kpropio-methyl-IP-Fr1-ZW.mgf

Click mouse within plot area to zoom in by factor of two about that point

Or,   to  Da Label all possible matches  Label matches used for scoring 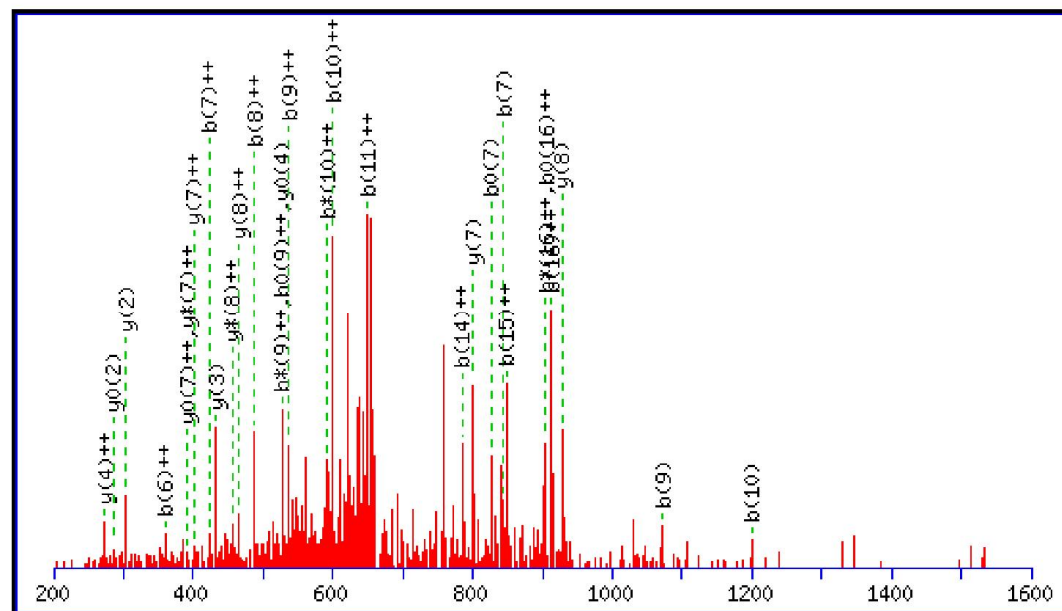**Monoisotopic mass of neutral peptide Mr(calc):** 1998.1019**Fixed modifications:** Carbamidomethyl (C) (apply to specified residues o**Variable modifications:****K6** : Propionyl-(13CD3)Methyl (K)**Ions Score:** 27 **Expect:** 1.3**Matches** : 30/176 fragment ions using 74 most intense peaks ([help](#))

| #  | b                | b <sup>++</sup> | b*        | b <sup>+</sup>  | b <sup>0</sup>  | b <sup>0++</sup> | Seq. | y               | y <sup>++</sup> | y*        | y <sup>+</sup>  | y <sup>0</sup>  | y <sup>0++</sup> | #  |
|----|------------------|-----------------|-----------|-----------------|-----------------|------------------|------|-----------------|-----------------|-----------|-----------------|-----------------|------------------|----|
| 1  | 100.0757         | 50.5415         |           |                 |                 |                  | Y    |                 |                 |           |                 |                 |                  | 17 |
| 2  | 213.1598         | 107.0835        |           |                 |                 |                  | L    | 1900.0407       | 950.5240        | 1883.0142 | 942.0107        | 1882.0301       | 941.5187         | 16 |
| 3  | 342.2023         | 171.6048        |           |                 | 324.1918        | 162.5995         | E    | 1786.9566       | 893.9820        | 1769.9301 | 885.4687        | 1768.9461       | 884.9767         | 15 |
| 4  | 457.2293         | 229.1183        |           |                 | 439.2187        | 220.1130         | D    | 1657.9140       | 829.4607        | 1640.8875 | 820.9474        | 1639.9035       | 820.4554         | 14 |
| 5  | 514.2508         | 257.6290        |           |                 | 496.2402        | 248.6237         | G    | 1542.8871       | 771.9472        | 1525.8606 | 763.4339        | 1524.8765       | 762.9419         | 13 |
| 6  | 716.4098         | <b>358.7095</b> | 699.3832  | 350.1952        | 698.3992        | 349.7032         | K    | 1485.8656       | 743.4365        | 1468.8391 | 734.9232        | 1467.8551       | 734.4312         | 12 |
| 7  | <b>844.4683</b>  | <b>422.2378</b> | 827.4418  | 414.2245        | <b>826.4578</b> | 413.7325         | Q    | 1283.7066       | 642.3570        | 1266.6801 | 633.8437        | 1265.6961       | 633.3517         | 11 |
| 8  | 972.5269         | <b>486.7671</b> | 955.5004  | 478.2538        | 954.5164        | 477.7618         | Q    | 1155.6480       | 578.3277        | 1138.6215 | 569.8144        | 1137.6375       | 569.3224         | 10 |
| 9  | <b>1071.5953</b> | <b>536.3013</b> | 1054.5688 | <b>527.7880</b> | 1053.5848       | <b>527.2960</b>  | Y    | 1027.5895       | 514.2984        | 1010.5629 | 505.7851        | 1009.5789       | 505.2931         | 9  |
| 10 | <b>1199.6539</b> | <b>600.3306</b> | 1182.6274 | <b>591.8173</b> | 1181.6434       | 591.3253         | Q    | <b>928.5211</b> | <b>464.7642</b> | 911.4945  | <b>456.2509</b> | 910.5105        | 455.7589         | 8  |
| 11 | 1298.7223        | <b>649.8648</b> | 1281.6958 | 641.3515        | 1280.7118       | 640.8595         | Y    | <b>800.4625</b> | <b>400.7349</b> | 783.4359  | <b>392.2216</b> | 782.4519        | <b>391.7296</b>  | 7  |
| 12 | 1397.7907        | 699.3990        | 1380.7642 | 690.3857        | 1379.7802       | 690.3937         | Y    | 701.3941        | 351.2007        | 684.3675  | 342.6874        | 683.3835        | 342.1954         | 6  |
| 13 | 1454.8122        | 727.9097        | 1437.7857 | 719.3965        | 1436.8016       | 718.9045         | G    | 602.3257        | 301.6665        | 585.2991  | 293.1532        | 584.3151        | 292.6612         | 5  |
| 14 | 1567.8963        | <b>784.4518</b> | 1550.8697 | 775.9385        | 1549.8857       | 775.4465         | L    | 545.3042        | <b>273.1557</b> | 528.2776  | 264.8425        | <b>267.2936</b> | 264.1504         | 4  |
| 15 | 1695.9548        | <b>848.4811</b> | 1678.9283 | 839.9678        | 1677.9443       | 839.4758         | Q    | <b>432.2201</b> | 216.6137        | 415.1936  | 208.1004        | 414.2096        | 207.6084         | 3  |
| 16 | 1824.9974        | <b>913.0024</b> | 1807.9709 | <b>904.4891</b> | 1806.9869       | <b>903.9971</b>  | E    | <b>304.1615</b> | 152.5844        | 287.1350  | 144.0711        | <b>286.1510</b> | 143.5791         | 2  |
| 17 |                  |                 |           |                 |                 |                  | R    | 175.1190        | 88.0631         | 158.0924  | 79.5498         |                 |                  | 1  |



MS/MS Fragmentation of **ATKTVSYR**Found in **Q8N8U2**, Chromodomain Y-like protein 2 OS=Homo sapiens GN=CDYL2 PE=1 SV=2

Match to Query 1110: 998.567168 from(500.290860, 2+) intensity(14889.3145)

Title: File667 Spectrum2963 scans: 4199

Data file \\192.168.1.104\public\raw data\Elite\_01\methylation\_ZW\SW620\2013-6-18-SW620-Kpropio-methyl-IP-Fr18-ZW.mgf

Click mouse within plot area to zoom in by factor of two about that point

Or,   to  Da Label all possible matches  Label matches used for scoring 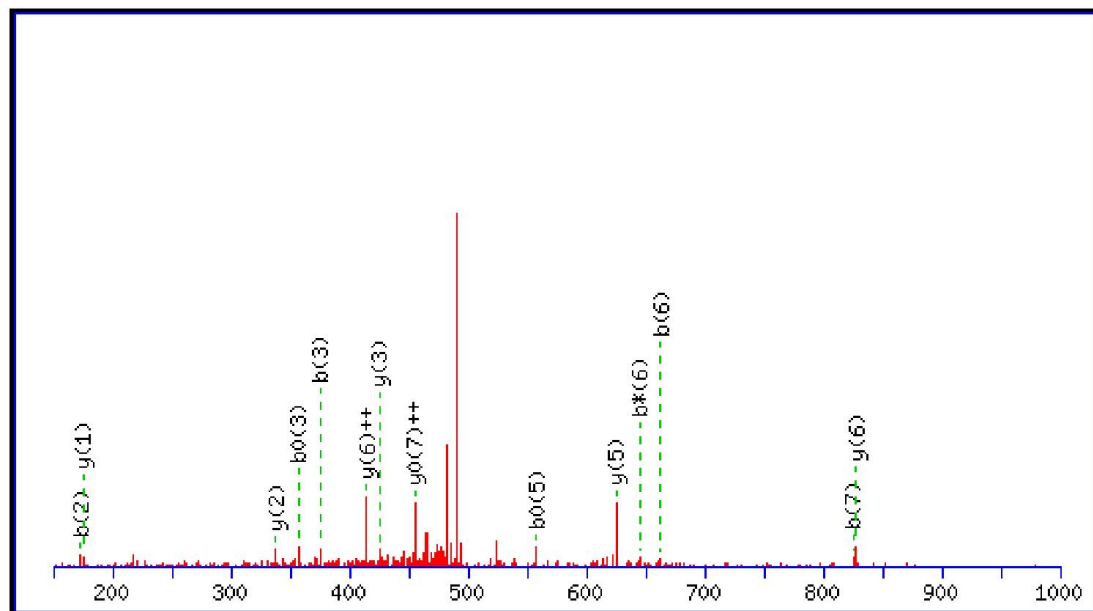**Monoisotopic mass of neutral peptide Mr(calc):** 998.5669**Fixed modifications:** Carbamidomethyl (C) (apply to specified residues or termini only)**Variable modifications:****K3** : Propionyl-(13C<sup>3</sup>)Methyl (K)**Ions Score:** 26 **Expect:** 0.88**Matches** : 14/74 fragment ions using 32 most

| # | b               | b <sup>++</sup> | b*              | b <sup>*++</sup> | b <sup>0</sup>  | b <sup>0++</sup> | Seq. | y               | y <sup>++</sup> | y*       | y <sup>*++</sup> | y <sup>0</sup> | y <sup>0++</sup> | # |
|---|-----------------|-----------------|-----------------|------------------|-----------------|------------------|------|-----------------|-----------------|----------|------------------|----------------|------------------|---|
| 1 | 72.0444         | 36.5258         |                 |                  |                 |                  | A    |                 |                 |          |                  |                |                  | 8 |
| 2 | <b>173.0921</b> | 87.0497         |                 |                  | 155.0815        | 78.0444          | T    | 928.5371        | 464.7722        | 911.5105 | 456.2589         | 910.5265       | <b>455.7669</b>  | 7 |
| 3 | <b>375.2511</b> | 188.1292        | 358.2245        | 179.6159         | <b>357.2405</b> | 179.1239         | K    | <b>827.4894</b> | <b>414.2483</b> | 810.4629 | 405.7351         | 809.4788       | 405.2431         | 6 |
| 4 | 476.2988        | 238.6530        | 459.2722        | 230.1397         | 458.2882        | 229.6477         | T    | <b>625.3304</b> | 313.1688        | 608.3039 | 304.6556         | 607.3198       | 304.1636         | 5 |
| 5 | 575.3672        | 288.1812        | 558.3406        | 279.6740         | <b>557.3566</b> | 279.1819         | V    | 524.2827        | 262.6450        | 507.2562 | 254.1317         | 506.2722       | 253.6397         | 4 |
| 6 | <b>662.3992</b> | 331.7032        | <b>645.3727</b> | 323.1900         | 644.3886        | 322.6980         | S    | <b>425.2143</b> | 213.1108        | 408.1878 | 204.5975         | 407.2037       | 204.1055         | 3 |
| 7 | <b>825.4625</b> | 413.2349        | 808.4360        | 404.7216         | 807.4520        | 404.2296         | Y    | <b>338.1823</b> | 169.5948        | 321.1557 | 161.0815         |                |                  | 2 |
| 8 |                 |                 |                 |                  |                 |                  | R    | <b>175.1190</b> | 88.0631         | 158.0924 | 79.5498          |                |                  | 1 |

MS/MS Fragmentation of **EDLLKYFGAQSVR**Found in **A8K1C9**, RNA-binding protein 40 OS=Homo sapiens GN=RNPC3 PE=2 SV=1

Match to Query 8475: 1598.867888 from(800.441220, 2+) intensity(49615.4648)

Title: File671 Spectrum11798 scans: 13122

Data file \\192.168.1.104\public\raw data\Elite\_01\methylation\_ZW\SW620\2013-6-18-SW620-Kpropio-methyl-IP-Fr5-ZW.mgf

Click mouse within plot area to zoom in by factor of two about that point

Or,   to  DaLabel all possible matches  Label matches used for scoring 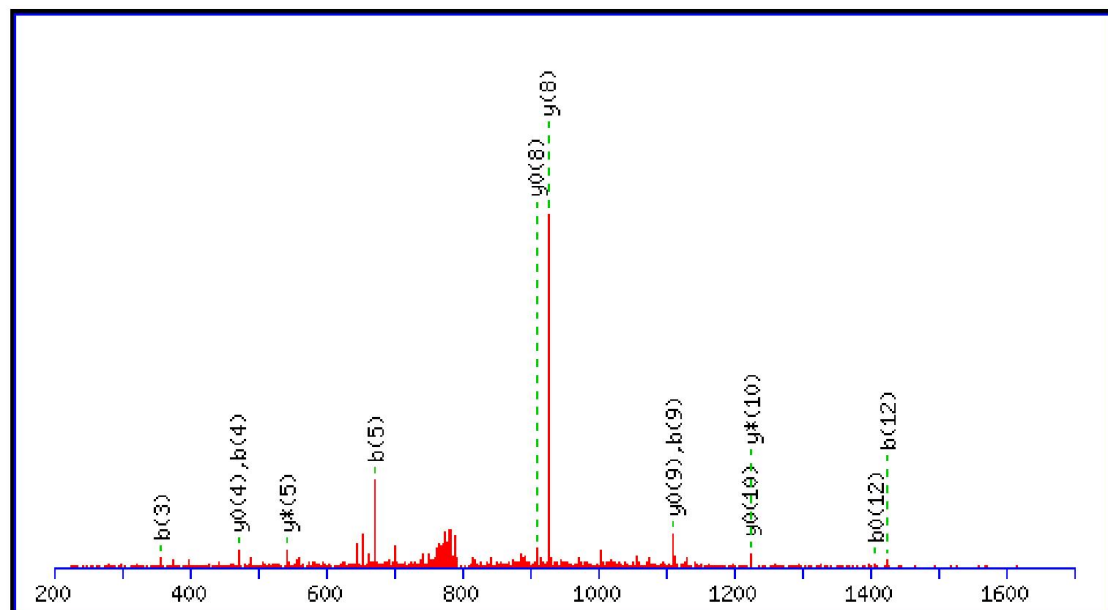**Monoisotopic mass of neutral peptide Mr(calc): 1598.8577****Fixed modifications:** Carbamidomethyl (C) (apply to specific)**Variable modifications:****K5** : Propionyl-(13CD3)Methyl (K)**Ions Score: 24 Expect: 2.1****Matches : 13/132 fragment ions using 14 most intense peaks**

| #  | b                | b <sup>++</sup> | b*        | b <sup>+++</sup> | b <sup>0</sup>   | b <sup>0++</sup> | Seq.     | y               | y <sup>++</sup> | y*               | y <sup>+++</sup> | y <sup>0</sup>   | y <sup>0++</sup> | #  |
|----|------------------|-----------------|-----------|------------------|------------------|------------------|----------|-----------------|-----------------|------------------|------------------|------------------|------------------|----|
| 1  | 130.0499         | 65.5286         |           |                  | 112.0393         | 56.5233          | <b>E</b> |                 |                 |                  |                  |                  |                  | 13 |
| 2  | 245.0768         | 123.0420        |           |                  | 227.0662         | 114.0368         | <b>D</b> | 1470.8224       | 735.9148        | 1453.7958        | 727.4016         | 1452.8118        | 726.9095         | 12 |
| 3  | <b>358.1609</b>  | 179.5841        |           |                  | 340.1503         | 170.5788         | <b>L</b> | 1355.7954       | 678.4014        | 1338.7689        | 669.8881         | 1337.7849        | 669.3961         | 11 |
| 4  | <b>471.2449</b>  | 236.1261        |           |                  | 453.2344         | 227.1208         | <b>L</b> | 1242.7114       | 621.8593        | <b>1225.6848</b> | 613.3460         | <b>1224.7008</b> | 612.8540         | 10 |
| 5  | <b>673.4040</b>  | 337.2056        | 656.3774  | 328.6923         | 655.3934         | 328.2003         | <b>K</b> | 1129.6273       | 565.3173        | 1112.6008        | 556.8040         | <b>1111.6167</b> | 556.3120         | 9  |
| 6  | 836.4673         | 418.7373        | 819.4407  | 410.2240         | 818.4567         | 409.7320         | <b>F</b> | <b>927.4683</b> | 464.2378        | 910.4417         | 455.7245         | <b>909.4577</b>  | 455.2325         | 8  |
| 7  | 983.5357         | 492.2715        | 966.5091  | 483.7582         | 965.5251         | 483.2662         | <b>Y</b> | 764.4050        | 382.7061        | 747.3764         | 374.1928         | 746.3944         | 373.7008         | 7  |
| 8  | 1040.5572        | 520.7822        | 1023.5306 | 512.2689         | 1022.5466        | 511.7769         | <b>G</b> | 617.3366        | 309.1719        | 600.3100         | 300.6586         | 599.3260         | 300.1666         | 6  |
| 9  | <b>1111.5943</b> | 556.3008        | 1094.5677 | 547.7875         | 1093.5837        | 547.2955         | <b>A</b> | 560.3151        | 280.6612        | <b>543.2885</b>  | 272.1479         | 542.3045         | 271.6559         | 5  |
| 10 | 1239.6529        | 620.3801        | 1222.6263 | 611.8168         | 1221.6423        | 611.3248         | <b>Q</b> | 489.2780        | 245.1426        | 472.2514         | 236.6293         | <b>471.2674</b>  | 236.1373         | 4  |
| 11 | 1326.6849        | 663.8461        | 1309.6583 | 655.3328         | 1308.6743        | 654.8408         | <b>S</b> | 361.2194        | 181.1133        | 344.1928         | 172.6001         | 343.2088         | 172.1081         | 3  |
| 12 | <b>1425.7533</b> | 713.3803        | 1408.7267 | 704.8670         | <b>1407.7427</b> | 704.3750         | <b>V</b> | 274.1874        | 137.5973        | 257.1608         | 129.0840         |                  |                  | 2  |
| 13 |                  |                 |           |                  |                  |                  | <b>R</b> | 175.1190        | 88.0631         | 158.0924         | 79.5498          |                  |                  | 1  |

Found in **P62701**, 40S ribosomal protein S4, X isoform OS=Homo sapiens GN=RPS4X PE=1 SV=2

Match to Query 3780: 1148.730162 from(383.917330, 3+) intensity(57175.6484)

Title: File394 Spectrum6552 scans: 7614

Data file \\192.168.1.104\public\raw data\Elite\_01\methylation\_ZW\SW620\2013-5-16-620-Kpropio-methyl-IP-Fr8-ZW.mgf

Click mouse within plot area to zoom in by factor of two about that point

Or,   to  Da  Label all possible matches  Label matches used for scoring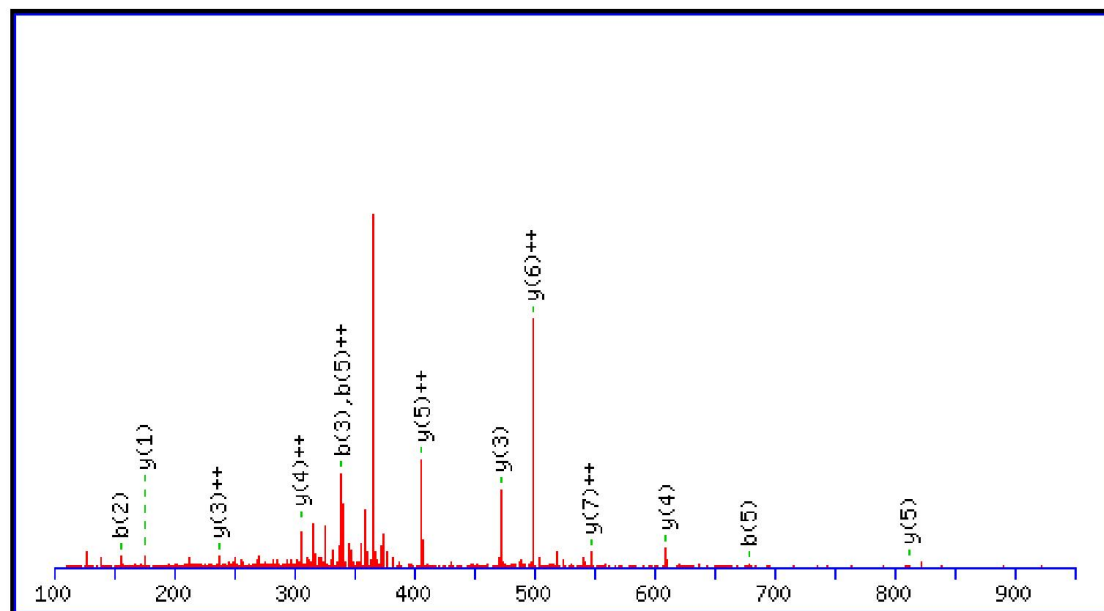**Monoisotopic mass of neutral peptide Mr(calc):** 1148.7302**Fixed modifications:** Carbamidomethyl (C) (apply to specified residues or +)**Variable modifications:****K3** : Propionyl (K)**K4** : Propionyl-(13CD3)Methyl (K)**K7** : Propionyl (K)**Ions Score:** 24 **Expect:** 0.63**Matches** : 13/52 fragment ions using 25 most intense peaks ([help](#))

| # | b               | b <sup>++</sup> | b*       | b <sup>*++</sup> | Seq. | y               | y <sup>++</sup> | y*        | y <sup>*++</sup> | # |
|---|-----------------|-----------------|----------|------------------|------|-----------------|-----------------|-----------|------------------|---|
| 1 | 58.0287         | 29.5180         |          |                  | G    |                 |                 |           |                  | 8 |
| 2 | <b>155.0815</b> | 78.0444         |          |                  | P    | 1092.7161       | <b>546.8617</b> | 1075.6895 | 538.3484         | 7 |
| 3 | <b>339.2027</b> | 170.1050        | 322.1761 | 161.5917         | K    | 995.6633        | <b>498.3353</b> | 978.6367  | 489.8220         | 6 |
| 4 | 541.3617        | 271.1845        | 524.3351 | 262.6712         | K    | <b>811.5421</b> | <b>406.2747</b> | 794.5156  | 397.7614         | 5 |
| 5 | <b>678.4206</b> | <b>339.7139</b> | 661.3941 | 331.2007         | H    | <b>609.3831</b> | <b>305.1952</b> | 592.3566  | 296.6819         | 4 |
| 6 | 791.5047        | 396.2560        | 774.4781 | 387.7427         | L    | <b>472.3242</b> | <b>236.6657</b> | 455.2976  | 228.1525         | 3 |
| 7 | 975.6258        | 488.3166        | 958.5993 | 479.8033         | K    | 359.2401        | 180.1237        | 342.2136  | 171.6104         | 2 |
| 8 |                 |                 |          |                  | R    | <b>175.1190</b> | 88.0631         | 158.0924  | 79.5498          | 1 |

MS/MS Fragmentation of **ELIGATAGKLHTGR**Found in **F8W943**, Argininosuccinate lyase (Fragment) OS=Homo sapiens GN=ASL PE=2 SV=1

Match to Query 8650: 1496.860992 from(499.960940, 3+) intensity(332980.7813)

Title: File392 Spectrum16961 scans: 18761

Data file \\192.168.1.104\public\raw data\Elite\_01\methylation\_ZW\SW620\2013-5-16-620-Kpropio-methyl-IP-Fr6-ZW.mgf

Click mouse within plot area to zoom in by factor of two about that point

Or,   to  Da Label all possible matches  Label matches used for scoring 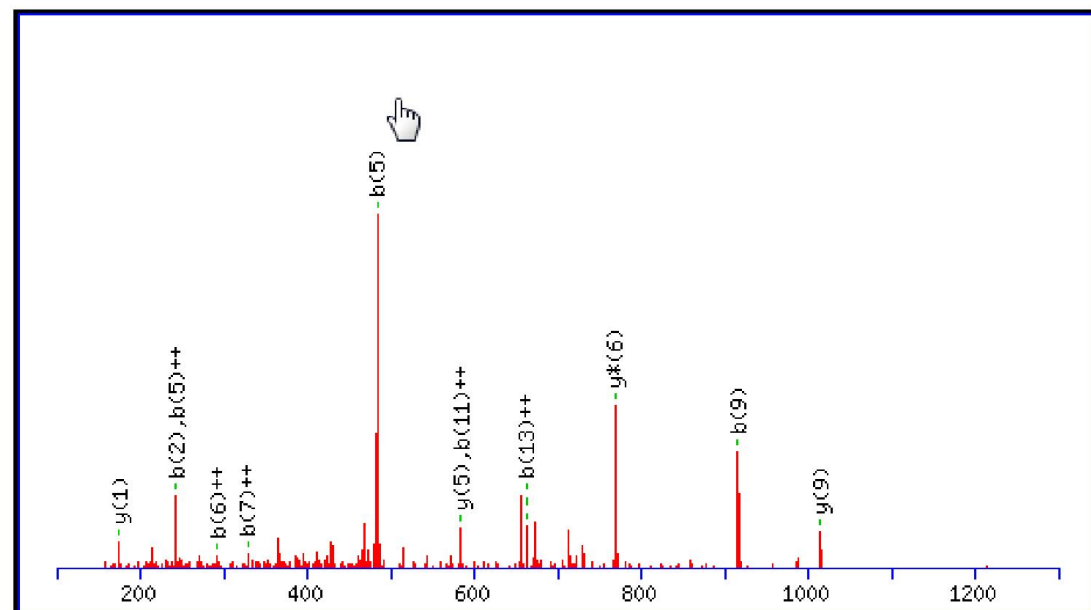Monoisotopic mass of neutral peptide **Mr(calc)**: 1496.8584

Fixed modifications: Carbamidomethyl (C) (apply to specified residue)

Variable modifications:

**K9** : Propionyl-(13CD3)Methyl (K)

Ions Score: 24 Expect: 1.8

Matches : 12/136 fragment ions using 19 most intense peaks [\(help\)](#)

| #  | b               | b <sup>++</sup> | b*        | b <sup>+++</sup> | b <sup>0</sup> | b <sup>0++</sup> | Seq.     | y                | y <sup>++</sup> | y*              | y <sup>+++</sup> | y <sup>0</sup> | y <sup>0++</sup> | #  |
|----|-----------------|-----------------|-----------|------------------|----------------|------------------|----------|------------------|-----------------|-----------------|------------------|----------------|------------------|----|
| 1  | 130.0499        | 65.5286         |           |                  | 112.0393       | 56.5233          | <b>E</b> |                  |                 |                 |                  |                |                  | 14 |
| 2  | <b>243.1339</b> | 122.0705        |           |                  | 225.1234       | 113.0653         | <b>L</b> | 1368.8230        | 684.9152        | 1351.7965       | 676.4019         | 1350.8125      | 675.9099         | 13 |
| 3  | 356.2180        | 178.6126        |           |                  | 338.2074       | 169.6074         | <b>I</b> | 1255.7390        | 628.3731        | 1238.7124       | 619.8599         | 1237.7294      | 619.3678         | 12 |
| 4  | 413.2395        | 207.1234        |           |                  | 395.2289       | 198.1181         | <b>G</b> | 1142.6549        | 571.8311        | 1125.6284       | 563.3178         | 1124.6444      | 562.8258         | 11 |
| 5  | <b>484.2766</b> | <b>242.6419</b> |           |                  | 466.2660       | 233.6366         | <b>A</b> | 1085.6335        | 543.3204        | 1068.6069       | 534.8071         | 1067.6229      | 534.3151         | 10 |
| 6  | 585.3243        | <b>293.1658</b> |           |                  | 567.3137       | 284.1605         | <b>T</b> | <b>1014.5963</b> | 507.8018        | 997.5698        | 499.2885         | 996.5858       | 498.7965         | 9  |
| 7  | 656.3614        | <b>328.6843</b> |           |                  | 638.3508       | 319.6790         | <b>A</b> | 913.5487         | 457.2780        | 896.5221        | 448.7647         | 895.5381       | 448.2727         | 8  |
| 8  | 713.3828        | 357.1951        |           |                  | 695.3723       | 348.1898         | <b>G</b> | 842.5115         | 421.7594        | 825.4850        | 413.2461         | 824.5010       | 412.7541         | 7  |
| 9  | <b>915.5418</b> | 458.2746        | 898.5153  | 449.7613         | 897.5313       | 449.2693         | <b>K</b> | 785.4901         | 393.2487        | <b>768.4635</b> | 384.7354         | 767.4795       | 384.2434         | 6  |
| 10 | 1028.6259       | 514.8166        | 1011.5994 | 506.3033         | 1010.6153      | 505.8113         | <b>L</b> | <b>583.3311</b>  | 292.1692        | 566.3045        | 283.6559         | 565.3205       | 283.1639         | 5  |
| 11 | 1165.6848       | <b>583.3460</b> | 1148.6583 | 574.8328         | 1147.6743      | 574.3408         | <b>H</b> | 470.2470         | 235.6271        | 453.2205        | 227.1139         | 452.2364       | 226.6219         | 4  |
| 12 | 1266.7325       | 633.8699        | 1249.7060 | 625.3566         | 1248.7219      | 624.8646         | <b>T</b> | 333.1888         | 167.0977        | 316.1615        | 158.5844         | 315.1775       | 158.0924         | 3  |
| 13 | 1323.7540       | <b>662.3806</b> | 1306.7274 | 653.8673         | 1305.7434      | 653.3753         | <b>G</b> | 232.1404         | 116.5738        | 215.1139        | 108.0606         |                |                  | 2  |
| 14 |                 |                 |           |                  |                |                  | <b>R</b> | <b>175.1190</b>  | 88.0631         | 158.0924        | 79.5498          |                |                  | 1  |

MS/MS Fragmentation of **YIKLRTGKTR**

Found in **H0YE88**, Transcriptional enhancer factor TEF-1 OS=Homo sapiens GN=TEAD1 PE=2 SV=1

Match to Query 5693: 1364.841408 from(683.427980, 2+) intensity(20136.0137)

Title: File388 Spectrum7434 scans: 8701

Data file \\192.168.1.104\public\raw data\Elite\_01\methylation\_ZW\SW620\2013-5-16-620-Kpropio-methyl-IP-Fr16-ZW.mgf

Click mouse within plot area to zoom in by factor of two about that point

Or,  to  Da

Label all possible matches  Label matches used for scoring

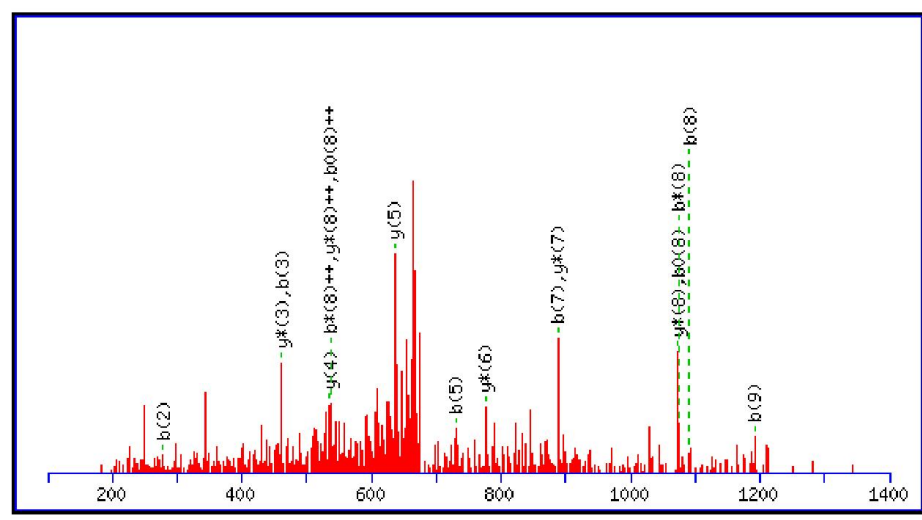

**Monoisotopic mass of neutral peptide Mr(calc):** 1364.8412

**Fixed modifications:** Carbamidomethyl (C) (apply to specified residues or termini only)

**Variable modifications:**

**K3** : Propionyl (K)

**K8** : Propionyl-(13CD3)Methyl (K)

**Ions Score:** 22 **Expect:** 1

**Matches :** 17/92 fragment ions using 34 most intense peaks [\(help\)](#)

| #  | b                | b <sup>++</sup> | b*               | b <sup>++</sup> | b <sup>0</sup>   | b <sup>0++</sup> | Seq. | y               | y <sup>++</sup> | y*               | y <sup>++</sup> | y <sup>0</sup> | y <sup>0++</sup> | #  |
|----|------------------|-----------------|------------------|-----------------|------------------|------------------|------|-----------------|-----------------|------------------|-----------------|----------------|------------------|----|
| 1  | 164.0706         | 82.5389         |                  |                 |                  |                  | Y    |                 |                 |                  |                 |                |                  | 10 |
| 2  | <b>277.1547</b>  | 139.0810        |                  |                 |                  |                  | I    | 1202.7852       | 601.8962        | 1185.7587        | 593.3830        | 1184.7746      | 592.8910         | 9  |
| 3  | <b>461.2758</b>  | 231.1416        | 444.2493         | 222.6283        |                  |                  | K    | 1089.7011       | 545.3542        | <b>1072.6746</b> | <b>536.8409</b> | 1071.6906      | 536.3489         | 8  |
| 4  | 574.3599         | 287.6836        | 557.3334         | 279.1703        |                  |                  | L    | 905.5800        | 453.2936        | <b>888.5534</b>  | 444.7803        | 887.5694       | 444.2883         | 7  |
| 5  | <b>730.4610</b>  | 365.7341        | 713.4345         | 357.2209        |                  |                  | R    | 792.4959        | 396.7516        | <b>775.4693</b>  | 388.2383        | 774.4853       | 387.7463         | 6  |
| 6  | 831.5087         | 416.2580        | 814.4822         | 407.7447        | 813.4981         | 407.2527         | T    | <b>636.3948</b> | 318.7010        | 619.3682         | 310.1878        | 618.3842       | 309.6957         | 5  |
| 7  | <b>888.5302</b>  | 444.7687        | 871.5036         | 436.2554        | 870.5196         | 435.7634         | G    | <b>535.3471</b> | 268.1772        | 518.3206         | 259.6639        | 517.3365       | 259.1719         | 4  |
| 8  | <b>1090.6892</b> | 545.8482        | <b>1073.6626</b> | <b>537.3350</b> | <b>1072.6786</b> | <b>536.8429</b>  | K    | 478.3256        | 239.6665        | <b>461.2991</b>  | 231.1532        | 460.3151       | 230.6612         | 3  |
| 9  | <b>1191.7369</b> | 596.3721        | 1174.7103        | 587.8588        | 1173.7263        | 587.3668         | T    | 276.1666        | 138.5870        | 259.1401         | 130.0737        | 258.1561       | 129.5817         | 2  |
| 10 |                  |                 |                  |                 |                  |                  | R    | 175.1190        | 88.0631         | 158.0924         | 79.5498         |                |                  | 1  |

MS/MS Fragmentation of **EKIETELR**Found in **E7ESK7**, 14-3-3 protein zeta/delta (Fragment) OS=Homo sapiens GN=YWHAZ PE=2 SV=1

Match to Query 2752: 1090.615948 from(546.315250, 2+) intensity(36465.8555)

Title: File440 Spectrum17183 scans: 19072

Data file \\192.168.1.104\public\raw data\Elite\_01\methylation\_ZW\SW620\2013-6-5-SW620-Kpropio-methyl-IP-Fr11-ZW.mgf

Click mouse within plot area to zoom in by factor of two about that point

Or,   to  Da Label all possible matches  Label matches used for scoring 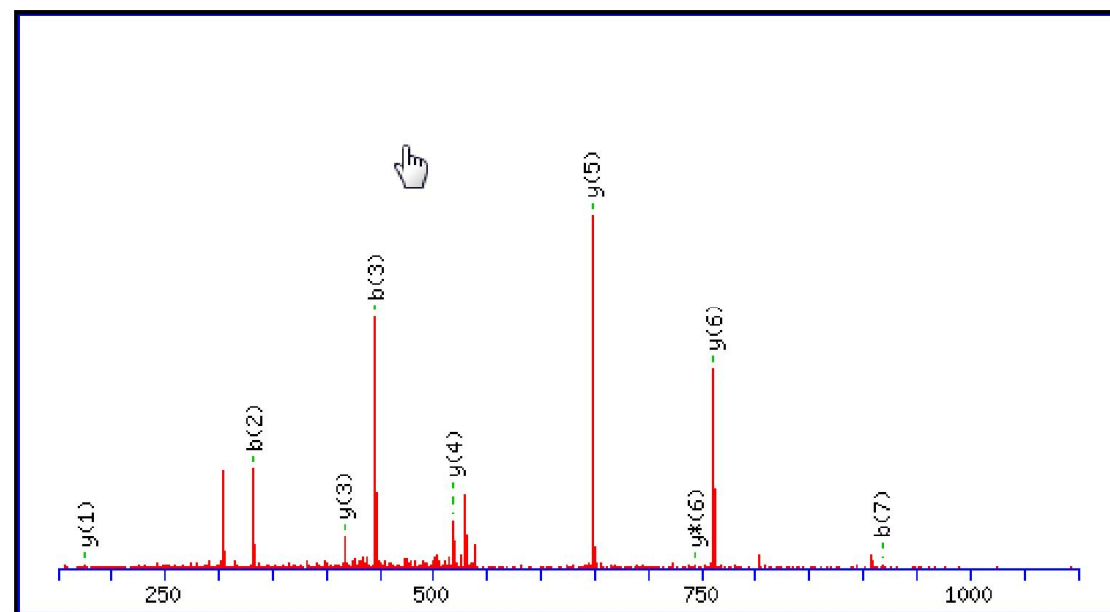**Monoisotopic mass of neutral peptide Mr(calc):** 1090.6142**Fixed modifications:** Carbamidomethyl (C) (apply to specified residues or termini only)**Variable modifications:****K2** : Propionyl-(13CD3)Methyl (K)**Ions Score:** 22 **Expect:** 2.4**Matches** : 9/78 fragment ions using 27 most intense peaks

| # | b               | b <sup>++</sup> | b <sup>+</sup> | b <sup>++</sup> | b <sup>0</sup> | b <sup>0++</sup> | Seq.     | y               | y <sup>++</sup> | y <sup>+</sup>  | y <sup>++</sup> | y <sup>0</sup> | y <sup>0++</sup> | #        |
|---|-----------------|-----------------|----------------|-----------------|----------------|------------------|----------|-----------------|-----------------|-----------------|-----------------|----------------|------------------|----------|
| 1 | 130.0499        | 65.5286         |                |                 | 112.0393       | 56.5233          | <b>K</b> |                 |                 |                 |                 |                |                  | <b>8</b> |
| 2 | <b>332.2089</b> | 166.6081        | 315.1823       | 158.0948        | 314.1983       | 157.6028         | <b>K</b> | 962.5790        | 481.7931        | 945.5524        | 473.2798        | 944.5684       | 472.7878         | <b>7</b> |
| 3 | <b>445.2929</b> | 223.1501        | 428.2654       | 214.6368        | 427.2824       | 214.1448         | <b>I</b> | <b>760.4199</b> | 380.7136        | <b>743.3934</b> | 372.2003        | 742.4094       | 371.7083         | <b>6</b> |
| 4 | 574.3355        | 287.6714        | 557.3090       | 279.1581        | 556.3250       | 278.6661         | <b>K</b> | <b>647.3359</b> | 324.1716        | 630.3093        | 315.6583        | 629.3253       | 315.1663         | <b>5</b> |
| 5 | 675.3832        | 338.1952        | 658.3567       | 329.6820        | 657.3727       | 329.1900         | <b>T</b> | <b>518.2933</b> | 259.6503        | 501.2667        | 251.1370        | 500.2827       | 250.6450         | <b>4</b> |
| 6 | 804.4258        | 402.7165        | 787.3993       | 394.2033        | 786.4152       | 393.7113         | <b>B</b> | <b>417.2456</b> | 209.1264        | 400.2191        | 200.6132        | 399.2350       | 200.1212         | <b>3</b> |
| 7 | <b>917.5099</b> | 459.2586        | 900.4833       | 450.7453        | 899.4993       | 450.2533         | <b>L</b> | 288.2030        | 144.6051        | 271.1765        | 136.0919        |                |                  | <b>2</b> |
| 8 |                 |                 |                |                 |                |                  | <b>R</b> | <b>175.1190</b> | 88.0631         | 158.0924        | 79.5498         |                |                  | <b>1</b> |

MS/MS Fragmentation of **TYSSSLKR**

Found in **HOY901**, Ladinin-1 (Fragment) OS=Homo sapiens GN=LAD1 PE=2 SV=1

Match to Query 1345: 1014.561488 from(508.288020, 2+) intensity(15789.7627)

Title: File669 Spectrum5264 scans: 6280

Data file \\192.168.1.104\public\raw data\Elite\_01\methylation\_ZW\SW620\2013-6-18-SW620-Kpropio-methyl-IP-Fr1-ZW.mgf

Click mouse within plot area to zoom in by factor of two about that point

Or,   to  Da

Label all possible matches  Label matches used for scoring

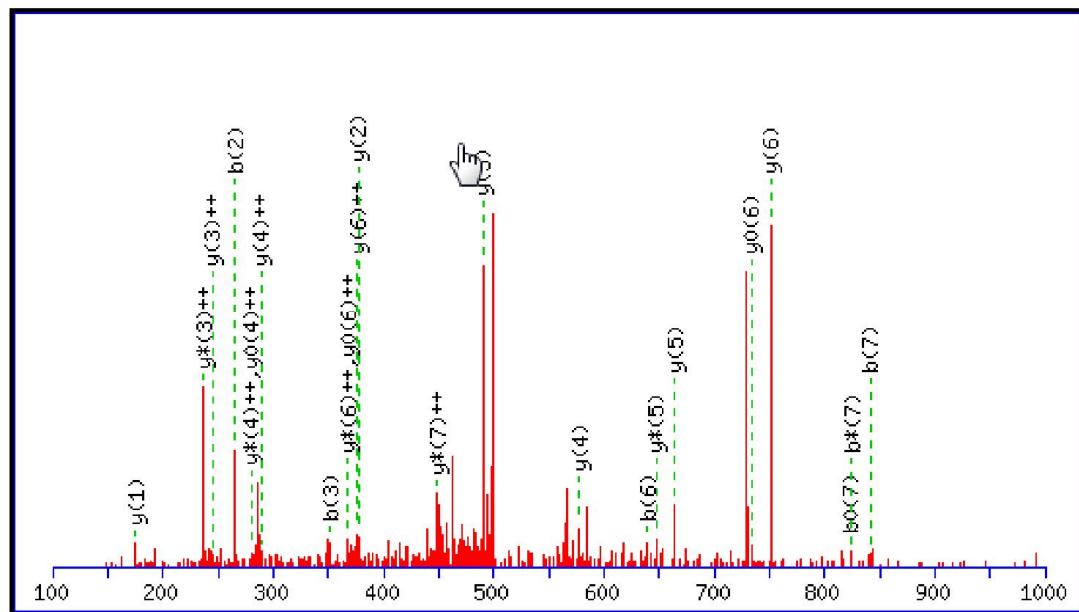

**Monoisotopic mass of neutral peptide Mr(calc):** 1014.5618

**Fixed modifications:** Carbamidomethyl (C) (apply to specified residues or termini only)

**Variable modifications:**

**K7** : Propionyl-(13CD3)Methyl (K)

**Ions Score:** 21 **Expect:** 3.1

**Matches :** 23/66 fragment ions using 67 most intense peaks [\(help\)](#)

| # | b               | b <sup>++</sup> | b <sup>+</sup>  | b <sup>+++</sup> | b <sup>0</sup>  | b <sup>0++</sup> | Seq. | y               | y <sup>++</sup> | y <sup>+</sup>  | y <sup>+++</sup> | y <sup>0</sup>  | y <sup>0++</sup> | # |
|---|-----------------|-----------------|-----------------|------------------|-----------------|------------------|------|-----------------|-----------------|-----------------|------------------|-----------------|------------------|---|
| 1 | 102.0550        | 51.5311         |                 |                  | 84.0444         | 42.5258          | T    |                 |                 |                 |                  |                 |                  | 8 |
| 2 | <b>265.1183</b> | 133.0628        |                 |                  | 247.1077        | 124.0575         | Y    | 914.5214        | 457.7644        | 897.4949        | <b>449.2511</b>  | 896.5109        | 448.7591         | 7 |
| 3 | <b>352.1503</b> | 176.5788        |                 |                  | 334.1397        | 167.5735         | S    | <b>751.4581</b> | <b>376.2327</b> | 734.4316        | <b>367.7194</b>  | <b>733.4475</b> | <b>367.2274</b>  | 6 |
| 4 | 439.1823        | 220.0948        |                 |                  | 421.1718        | 211.0895         | S    | <b>664.4261</b> | 332.7167        | <b>647.3995</b> | 324.2034         | 646.4155        | 323.7114         | 5 |
| 5 | 526.2144        | 263.6108        |                 |                  | 508.2038        | 254.6055         | S    | <b>577.3947</b> | <b>289.2007</b> | 560.3675        | <b>230.6874</b>  | 559.3835        | <b>280.1954</b>  | 4 |
| 6 | <b>639.2984</b> | 320.1529        |                 |                  | 621.2879        | 311.1476         | L    | <b>490.3620</b> | <b>245.6847</b> | 473.3355        | <b>237.1714</b>  |                 |                  | 3 |
| 7 | <b>841.4574</b> | 421.2324        | <b>824.4309</b> | 412.7191         | <b>823.4469</b> | 412.2271         | K    | <b>377.2780</b> | 189.1426        | 360.2514        | 180.6293         |                 |                  | 2 |
| 8 |                 |                 |                 |                  |                 |                  | R    | <b>175.1190</b> | 88.0631         | 158.0924        | 79.5498          |                 |                  | 1 |

MS/MS Fragmentation of **TQKALILDSVMR**

Found in **Q8WZ64**, Arf-GAP with Rho-GAP domain, ANK repeat and PH domain-containing protein 2 OS=Homo sapiens GN=ARAP2 PE=1 SV=3

Match to Query 6460: 1430.835428 from(716.424990,2+) intensity(48018.9492)

Title: File388 Spectrum13385 scans: 15069

Data file \\192.168.1.104\public\raw data\Elite\_01\methylation\_ZW\SW620\2013-5-16-620-Kpropio-methyl-IP-Fr16-ZW.mgf

Click mouse within plot area to zoom in by factor of two about that point

Or,   to  Da

Label all possible matches  Label matches used for scoring

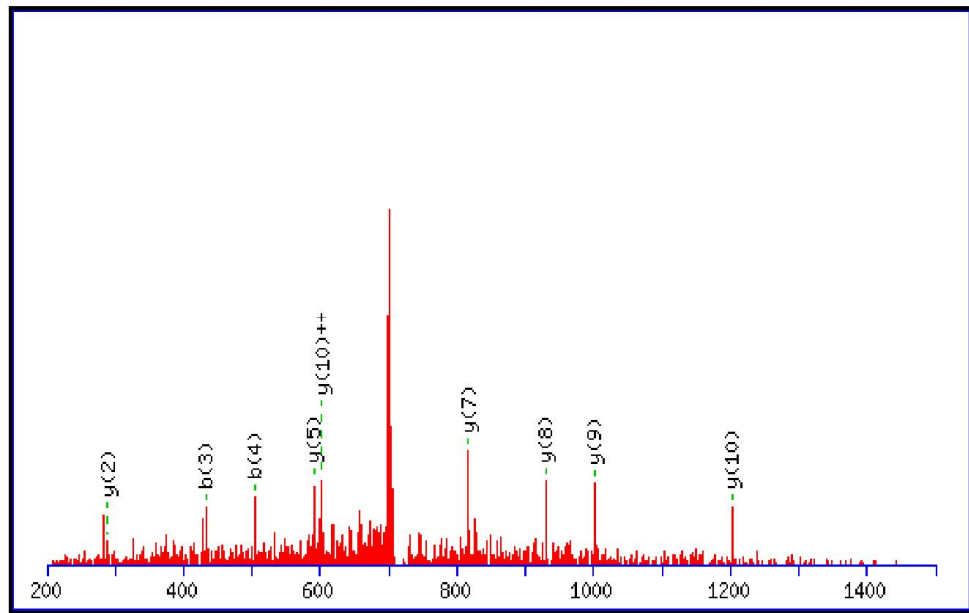

**Monoisotopic mass of neutral peptide Mr(calc): 1430.8365**

**Fixed modifications:** Carbamidomethyl (C) (apply to specified residues or termini on<sup>1+\*</sup>)

**Variable modifications:**

**K3** : Propionyl-(13CD3)Methyl (K)

**Ions Score: 21 Expect: 2.9**

**Matches : 9/124 fragment ions using 26 most intense peaks** [\(help\)](#)

| #  | b               | b <sup>++</sup> | b*        | b <sup>++</sup> | b <sup>0</sup> | b <sup>0++</sup> | Seq. | y                | y <sup>++</sup> | y*        | y <sup>++</sup> | y <sup>0</sup> | y <sup>0++</sup> | #  |
|----|-----------------|-----------------|-----------|-----------------|----------------|------------------|------|------------------|-----------------|-----------|-----------------|----------------|------------------|----|
| 1  | 102.0550        | 51.5311         |           |                 | 84.0444        | 42.5258          | T    |                  |                 |           |                 |                |                  | 12 |
| 2  | 230.1135        | 115.5604        | 213.0870  | 107.0471        | 212.1030       | 106.5551         | Q    | 1330.7962        | 665.9017        | 1313.7696 | 657.3834        | 1312.7856      | 656.8964         | 11 |
| 3  | <b>432.2725</b> | 216.6399        | 415.2460  | 203.1266        | 414.2620       | 207.6346         | K    | <b>1202.7376</b> | <b>601.8724</b> | 1135.7110 | 593.3592        | 1134.7270      | 592.8671         | 10 |
| 4  | <b>503.3097</b> | 252.1585        | 486.2831  | 243.6452        | 485.2991       | 243.1532         | A    | <b>1000.5706</b> | 500.7929        | 983.5520  | 492.2796        | 982.5680       | 491.7876         | 9  |
| 5  | 616.3937        | 308.7005        | 599.3672  | 300.1872        | 598.3832       | 299.6962         | L    | <b>929.5415</b>  | 465.2744        | 912.5149  | 456.7611        | 911.5309       | 456.2691         | 8  |
| 6  | 729.4778        | 365.2425        | 712.4512  | 356.7293        | 711.4672       | 356.2372         | I    | <b>816.4574</b>  | 408.7323        | 799.4308  | 400.2191        | 798.4468       | 399.7271         | 7  |
| 7  | 842.5619        | 421.7846        | 825.5353  | 413.2713        | 824.5513       | 412.7793         | L    | 703.3733         | 352.1903        | 686.3468  | 343.6770        | 685.3628       | 343.1850         | 6  |
| 8  | 957.5883        | 479.2980        | 940.5622  | 470.7348        | 939.5782       | 470.2923         | D    | <b>590.2893</b>  | 295.6483        | 573.2627  | 287.1350        | 572.2787       | 286.6430         | 5  |
| 9  | 1044.6208       | 522.8140        | 1027.5943 | 514.3008        | 1026.6103      | 513.8088         | S    | 475.2623         | 238.1348        | 458.2358  | 229.6215        | 457.2518       | 229.1295         | 4  |
| 10 | 1143.6892       | 572.3483        | 1126.6627 | 563.8350        | 1125.6787      | 563.3430         | V    | 388.2303         | 194.6188        | 371.2037  | 186.1055        |                |                  | 3  |
| 11 | 1257.7322       | 629.3697        | 1240.7056 | 620.8564        | 1239.7216      | 620.3644         | N    | <b>289.1619</b>  | 145.0846        | 272.1353  | 136.5713        |                |                  | 2  |
| 12 |                 |                 |           |                 |                |                  | R    | 175.1190         | 88.0631         | 158.0924  | 79.5498         |                |                  | 1  |



Found in **H9KVB4**, Trinucleotide repeat-containing gene 18 protein OS=Homo sapiens GN=TNRC18 PE=2 SV=1

Match to Query 6564: 1400.827728 from(701.421140,2+) intensity(38974.1602)

Title: File443 Spectrum6130 scans: 7298

Data file \\192.168.1.104\public\raw data\Elite\_01\methylation\_ZW\SW620\2013-6-6-SW620-Kpropio-methyl-IP-Fr15-ZW.mgf

Click mouse within plot area to zoom in by factor of two about that point

Or,   to  Da Label all possible matches  Label matches used for scoring 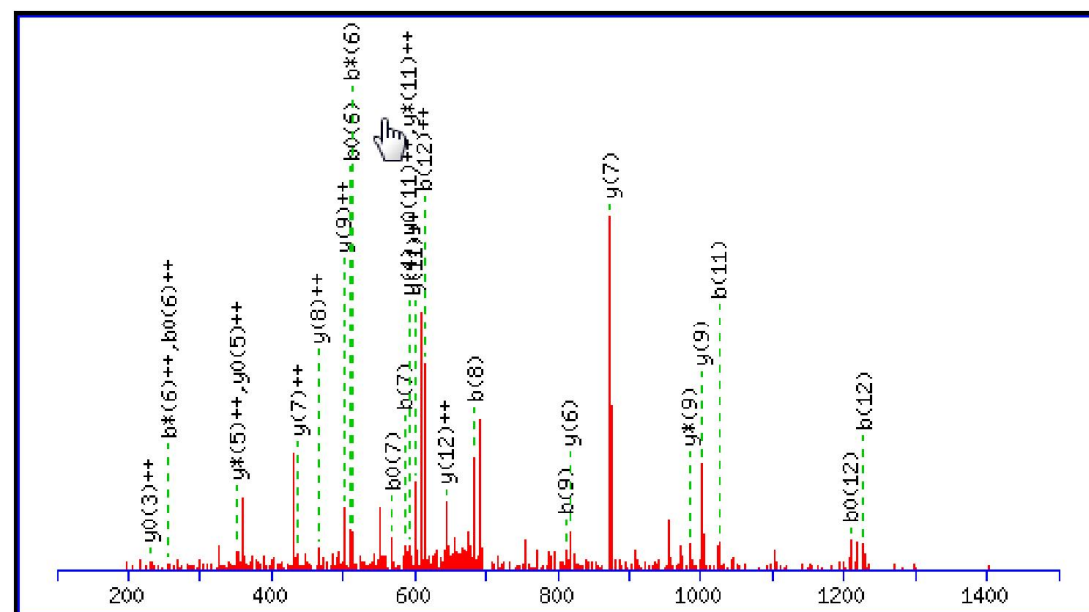**Monoisotopic mass of neutral peptide Mr(calc):** 1400.8372**Fixed modifications:** Carbamidomethyl (C) (apply to specified residues or termini only)**Variable modifications:****K12** : Propionyl-(13CD3)Methyl (K)**Ions Score:** 20 **Expect:** 3.2**Matches** : 27/138 fragment ions using 90 most intense peaks [\(hel\)](#)

| #  | b         | b <sup>++</sup> | b <sup>*</sup> | b <sup>+++</sup> | b <sup>0</sup> | b <sup>0++</sup> | Seq.     | y         | y <sup>++</sup> | y <sup>*</sup> | y <sup>+++</sup> | y <sup>0</sup> | y <sup>0++</sup> | #  |
|----|-----------|-----------------|----------------|------------------|----------------|------------------|----------|-----------|-----------------|----------------|------------------|----------------|------------------|----|
| 1  | 115.0502  | 58.0287         | 98.0237        | 49.5155          |                |                  | <b>N</b> |           |                 |                |                  |                |                  | 13 |
| 2  | 202.0822  | 101.5448        | 185.0557       | 93.0315          | 184.0717       | 92.5395          | <b>S</b> | 1287.8016 | 644.4044        | 1270.7750      | 635.8912         | 1269.7910      | 635.3991         | 12 |
| 3  | 330.1772  | 165.5922        | 313.1506       | 157.0790         | 312.1668       | 156.5870         | <b>K</b> | 1200.7698 | 600.8884        | 1183.7430      | 592.3751         | 1182.7590      | 591.8831         | 11 |
| 4  | 401.2143  | 201.1108        | 384.1878       | 192.5975         | 383.2037       | 192.1055         | <b>A</b> | 1072.6746 | 536.8409        | 1055.6480      | 528.3277         | 1054.6640      | 527.8357         | 10 |
| 5  | 472.2514  | 236.6293        | 455.2249       | 228.1161         | 454.2409       | 227.6241         | <b>A</b> | 1001.6375 | 501.3224        | 984.6109       | 492.8091         | 983.6269       | 492.3171         | 9  |
| 6  | 529.2729  | 265.1401        | 512.2463       | 256.6268         | 511.2623       | 256.1348         | <b>G</b> | 930.6004  | 465.8038        | 913.5738       | 457.2905         | 912.5898       | 456.7985         | 8  |
| 7  | 586.2944  | 293.6508        | 569.2678       | 285.1375         | 568.2838       | 284.6455         | <b>G</b> | 873.5789  | 437.2931        | 856.5523       | 428.7798         | 855.5683       | 428.2878         | 7  |
| 8  | 683.3471  | 342.1772        | 666.3206       | 333.6639         | 665.3385       | 333.1719         | <b>P</b> | 816.5574  | 408.7824        | 799.5309       | 400.2691         | 798.5469       | 399.7771         | 6  |
| 9  | 811.4421  | 406.2247        | 794.4155       | 397.7114         | 793.4315       | 397.2194         | <b>K</b> | 719.5047  | 360.2560        | 702.4781       | 351.7427         | 701.4941       | 351.2507         | 5  |
| 10 | 924.5261  | 462.7667        | 907.4996       | 454.2534         | 906.5156       | 453.7614         | <b>L</b> | 591.4097  | 296.2085        | 574.3832       | 287.6952         | 573.3991       | 287.2032         | 4  |
| 11 | 1025.5738 | 513.2905        | 1008.5473      | 504.7773         | 1007.5633      | 504.2853         | <b>T</b> | 478.3256  | 239.6665        | 461.2991       | 231.1532         | 460.3151       | 230.6612         | 3  |
| 12 | 1227.7328 | 614.3701        | 1210.7063      | 605.8568         | 1209.7223      | 605.3648         | <b>K</b> | 377.2780  | 189.1426        | 360.2514       | 180.6293         |                |                  | 2  |
| 13 |           |                 |                |                  |                |                  | <b>R</b> | 175.1190  | 88.0631         | 158.0924       | 79.5493          |                |                  | 1  |

Found in **Q6P1J9**, Parafibromin OS=Homo sapiens GN=CDC73 PE=1 SV=1

Match to Query 4790: 1331.746688 from(666.880620,2+) intensity(34781.2969)

Title: File671 Spectrum7222 scans: 8241

Data file \\192.168.1.104\public\raw data\Elite\_01\methylation\_ZW\SW620\2013-6-18-SW620-Kpropio-methyl-IP-Fr5-ZW.mgf

Click mouse within plot area to zoom in by factor of two about that point

Or,  100 to  Da Label all possible matches  Label matches used for scoring 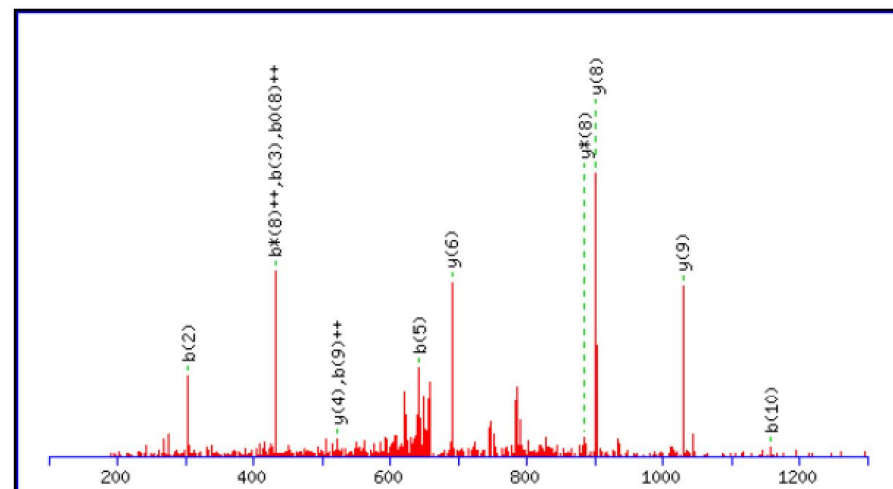

Monoisotopic mass of neutral peptide Mr(calc): 1331.7470

Fixed modifications: Carbamidomethyl (C) (apply to specified residues or termini only)

Variable modifications:

K2 : Propionyl-(13CD3)Methyl (K)

Ions Score: 31 Expect: 0.36

Matches : 12/98 fragment ions using 12 most intense peaks ([help](#))

| #  | b                | b <sup>++</sup> | b <sup>*</sup> | b <sup>+++</sup> | b <sup>0</sup> | b <sup>0++</sup> | Seq.     | y                | y <sup>++</sup> | y <sup>*</sup>  | y <sup>+++</sup> | #         |
|----|------------------|-----------------|----------------|------------------|----------------|------------------|----------|------------------|-----------------|-----------------|------------------|-----------|
| 1  | 102.0550         | 51.5311         |                |                  | 84.0444        | 42.5258          | <b>T</b> |                  |                 |                 |                  | <b>11</b> |
| 2  | <b>304.2140</b>  | 152.6106        | 287.1874       | 144.0973         | 286.2034       | 143.6053         | <b>K</b> | 1231.7066        | 616.3569        | 1214.6801       | 607.8437         | <b>10</b> |
| 3  | <b>432.2725</b>  | 216.6399        | 415.2460       | 208.1266         | 414.2620       | 207.6346         | <b>Q</b> | <b>1029.5476</b> | 515.2774        | 1012.5211       | 506.7642         | <b>9</b>  |
| 4  | 529.3253         | 265.1663        | 512.2988       | 256.6530         | 511.3147       | 256.1610         | <b>P</b> | <b>901.4890</b>  | 451.2482        | <b>884.4625</b> | 442.7349         | <b>8</b>  |
| 5  | <b>642.4094</b>  | 321.7083        | 625.3828       | 313.1951         | 624.3988       | 312.7030         | <b>I</b> | 804.4363         | 402.7218        | 787.4097        | 394.2085         | <b>7</b>  |
| 6  | 739.4621         | 370.2347        | 722.4356       | 361.7214         | 721.4516       | 361.2294         | <b>P</b> | <b>691.3522</b>  | 346.1797        | 674.3257        | 337.6665         | <b>6</b>  |
| 7  | 810.4993         | 405.7533        | 793.4727       | 397.2400         | 792.4887       | 396.7480         | <b>A</b> | 594.2994         | 297.6534        | 577.2729        | 289.1401         | <b>5</b>  |
| 8  | 881.5364         | 441.2718        | 864.5098       | <b>432.7585</b>  | 863.5258       | <b>432.2665</b>  | <b>A</b> | <b>523.2623</b>  | 262.1348        | 506.2358        | 253.6215         | <b>4</b>  |
| 9  | 1044.5997        | <b>522.8035</b> | 1027.5731      | 514.2902         | 1026.5891      | 513.7982         | <b>Y</b> | 452.2252         | 226.6162        | 435.1987        | 218.1030         | <b>3</b>  |
| 10 | <b>1158.6426</b> | 579.8249        | 1141.6161      | 571.3117         | 1140.6321      | 570.8197         | <b>N</b> | 289.1619         | 145.0846        | 272.1353        | 136.5713         | <b>2</b>  |
| 11 |                  |                 |                |                  |                |                  | <b>R</b> | 175.1190         | 88.0631         | 158.0924        | 79.5498          | <b>1</b>  |

Found in **J3QRV5**, Lethal(2) giant larvae protein homolog 2 OS=Homo sapiens GN=LLGL2 PE=4 SV=1

Match to Query 3778: 1243.812968 from(622.913760,2+) intensity(46833.3438)

Title: File671 Spectrum11978 scans: 13314

Data file \\192.168.1.104\public\raw data\Elite\_01\methylation\_ZW\SW620\2013-6-18-SW620-Kpropio-methyl-IP-Fr5-ZW.mgf

Click mouse within plot area to zoom in by factor of two about that point

Or,  100 to  Da Label all possible matches  Label matches used for scoring 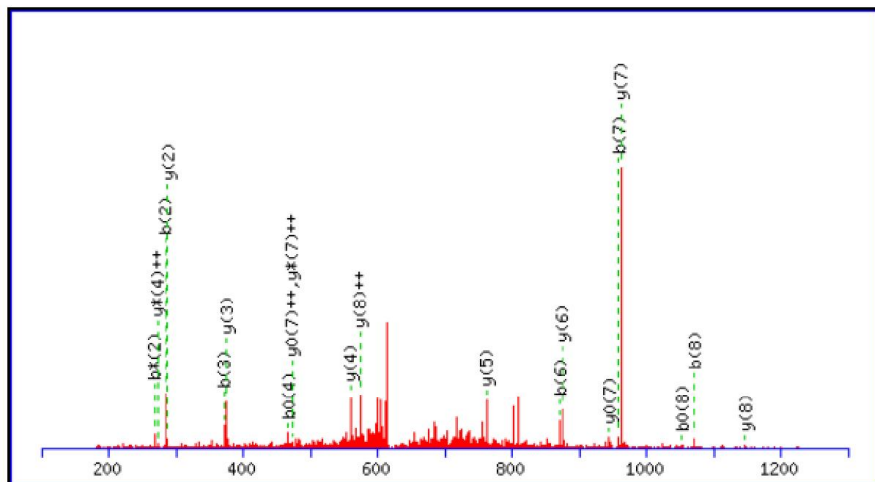

Monoisotopic mass of neutral peptide Mr(calc): 1243.8136

Fixed modifications: Carbamidomethyl (C) (apply to specified residues or termini only)

Variable modifications:

K2 : Propionyl (K)

K5 : Propionyl-(13CD3)Methyl (K)

K6 : Propionyl (K)

Ions Score: 34 Expect: 0.028

Matches : 20/86 fragment ions using 44 most intense peaks ([help](#))

| # | b                | b <sup>++</sup> | b <sup>*</sup>  | b <sup>*++</sup> | b <sup>0</sup>   | b <sup>0++</sup> | Seq. | y                | y <sup>++</sup> | y <sup>*</sup> | y <sup>*++</sup> | y <sup>0</sup>  | y <sup>0++</sup> | # |
|---|------------------|-----------------|-----------------|------------------|------------------|------------------|------|------------------|-----------------|----------------|------------------|-----------------|------------------|---|
| 1 | 100.0757         | 50.5415         |                 |                  |                  |                  | V    |                  |                 |                |                  |                 |                  | 9 |
| 2 | <b>284.1969</b>  | 142.6021        | <b>267.1703</b> | 134.0888         |                  |                  | K    | <b>1145.7525</b> | <b>573.3799</b> | 1128.7260      | 564.8666         | 1127.7419       | 564.3746         | 8 |
| 3 | <b>371.2289</b>  | 186.1181        | 354.2023        | 177.6048         | 353.2183         | 177.1128         | S    | <b>961.6313</b>  | 481.3193        | 944.6048       | <b>472.8060</b>  | <b>943.6208</b> | <b>472.3140</b>  | 7 |
| 4 | 484.3130         | 242.6601        | 467.2864        | 234.1468         | <b>466.3024</b>  | 233.6548         | L    | <b>874.5993</b>  | 437.8033        | 857.5727       | 429.2900         | 856.5887        | 428.7980         | 6 |
| 5 | 686.4720         | 343.7396        | 669.4454        | 335.2264         | 668.4614         | 334.7343         | K    | <b>761.5152</b>  | 381.2613        | 744.4887       | 372.7480         | 743.5047        | 372.2560         | 5 |
| 6 | <b>870.5932</b>  | 435.8002        | 853.5666        | 427.2869         | 852.5826         | 426.7949         | K    | <b>559.3562</b>  | 280.1817        | 542.3297       | <b>271.6685</b>  | 541.3457        | 271.1765         | 4 |
| 7 | <b>957.6252</b>  | 479.3162        | 940.5986        | 470.8030         | 939.6146         | 470.3109         | S    | <b>375.2350</b>  | 188.1212        | 358.2085       | 179.6079         | 357.2245        | 179.1159         | 3 |
| 8 | <b>1070.7092</b> | 535.8583        | 1053.6827       | 527.3450         | <b>1052.6987</b> | 526.8530         | L    | <b>288.2030</b>  | 144.6051        | 271.1765       | 136.0919         |                 |                  | 2 |
| 9 |                  |                 |                 |                  |                  |                  | R    | 175.1190         | 88.0631         | 158.0924       | 79.5498          |                 |                  | 1 |

Found in **Q13895**, Bystin OS=Homo sapiens GN=BYSL PE=1 SV=3

Match to Query 1641: 1002.613748 from(502.314150,2+) intensity(50403.8359)

Title: File660 Spectrum13595 scans: 15302

Data file \\192.168.1.104\public\raw data\Elite\_01\methylation\_ZW\SW620\2013-6-18-SW620-Kpropio-methyl-IP-Fr3-ZW.mgf

Click mouse within plot area to zoom in by factor of two about that point

Or,  100 to  Da Label all possible matches  Label matches used for scoring 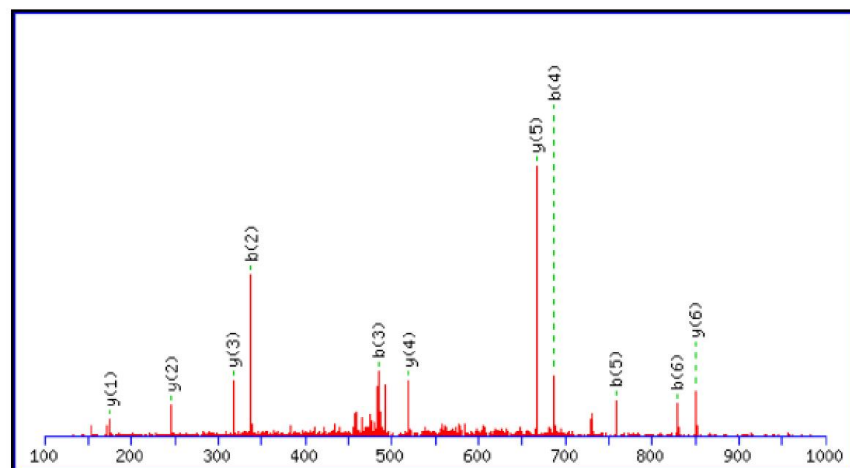

Monoisotopic mass of neutral peptide Mr(calc): 1002.6135

Fixed modifications: Carbamidomethyl (C) (apply to specified residues or termini only)

Variable modifications:

N-term : Propionyl (protein N-term) (Protein N-term)

K2 : Propionyl (K)

K4 : Propionyl-(13CD3)Methyl (K)

Ions Score: 42 Expect: 0.015

Matches : 11/46 fragment ions using 18 most intense peaks ([help](#))

| # | b               | b <sup>++</sup> | b*       | b <sup>*++</sup> | Seq. | y               | y <sup>++</sup> | y*       | y <sup>*++</sup> | # |
|---|-----------------|-----------------|----------|------------------|------|-----------------|-----------------|----------|------------------|---|
| 1 | 154.0863        | 77.5468         |          |                  | P    |                 |                 |          |                  | 7 |
| 2 | <b>338.2074</b> | 169.6074        | 321.1809 | 161.0941         | K    | <b>850.5418</b> | 425.7745        | 833.5152 | 417.2613         | 6 |
| 3 | <b>485.2758</b> | 243.1416        | 468.2493 | 234.6283         | F    | <b>666.4206</b> | 333.7139        | 649.3941 | 325.2007         | 5 |
| 4 | <b>687.4349</b> | 344.2211        | 670.4083 | 335.7078         | K    | <b>519.3522</b> | 260.1797        | 502.3256 | 251.6665         | 4 |
| 5 | <b>758.4720</b> | 379.7396        | 741.4454 | 371.2264         | A    | <b>317.1932</b> | 159.1002        | 300.1666 | 150.5870         | 3 |
| 6 | <b>829.5091</b> | 415.2582        | 812.4825 | 406.7449         | A    | <b>246.1561</b> | 123.5817        | 229.1295 | 115.0684         | 2 |
| 7 |                 |                 |          |                  | R    | <b>175.1190</b> | 88.0631         | 158.0924 | 79.5498          | 1 |

Found in Q99459, Cell division cycle 5-like protein OS=Homo sapiens GN=CDC5L PE=1 SV=2

Match to Query 4841: 1399.841288 from(700.927920,2+) intensity(219706.3750)

Title: File667 Spectrum4478 scans: 5875

Data file \\192.168.1.104\public\raw data\Elite\_01\methylation\_ZW\SW620\2013-6-18-SW620-Kpropio-methyl-IP-Fr18-ZW.mgf

Click mouse within plot area to zoom in by factor of two about that point

Or,  to  Da Label all possible matches  Label matches used for scoring 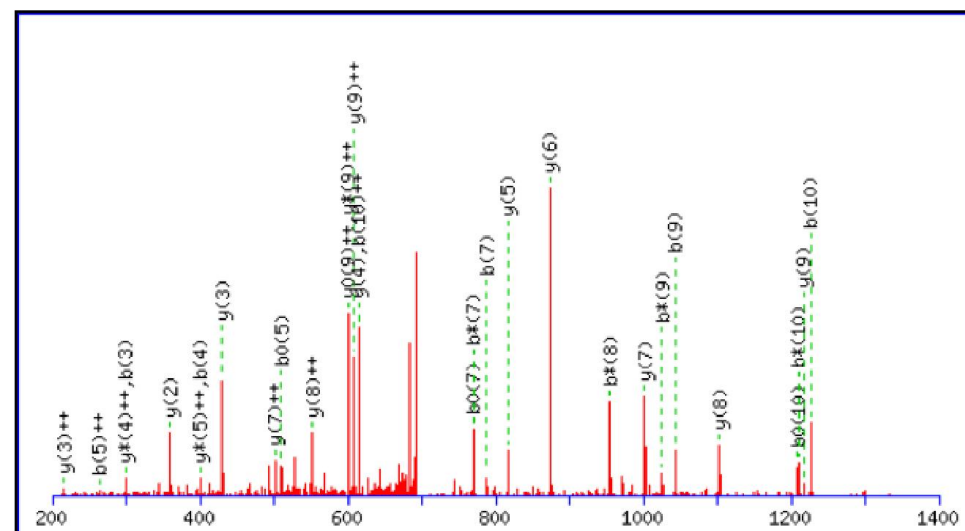

Monoisotopic mass of neutral peptide Mr(calc): 1399.8419

Fixed modifications: Carbamidomethyl (C) (apply to specified residues or termini only)

Variable modifications:

K7 : Propionyl-(13CD3)Methyl (K)

K8 : Propionyl (K)

K10 : Propionyl (K)

Ions Score: 67 Expect: 5.4e-005

Matches : 30/96 fragment ions using 34 most intense peaks ([help](#))

| #  | b                | b <sup>++</sup> | b*               | b <sup>*++</sup> | b <sup>0</sup>   | b <sup>0++</sup> | Seq. | y                | y <sup>++</sup> | y*        | y <sup>*++</sup> | y <sup>0</sup> | y <sup>0++</sup> | #  |
|----|------------------|-----------------|------------------|------------------|------------------|------------------|------|------------------|-----------------|-----------|------------------|----------------|------------------|----|
| 1  | 114.0913         | 57.5493         |                  |                  |                  |                  | L    |                  |                 |           |                  |                |                  | 11 |
| 2  | 185.1285         | 93.0679         |                  |                  |                  |                  | A    | 1287.7652        | 644.3862        | 1270.7386 | 635.8730         | 1269.7546      | 635.3810         | 10 |
| 3  | <b>299.1714</b>  | 150.0893        | 282.1448         | 141.5761         |                  |                  | N    | <b>1216.7281</b> | <b>608.8677</b> | 1199.7015 | <b>600.3544</b>  | 1198.7175      | <b>599.8624</b>  | 9  |
| 4  | <b>400.2191</b>  | 200.6132        | 383.1925         | 192.0999         | 382.2085         | 191.6079         | T    | <b>1102.6852</b> | <b>551.8462</b> | 1085.6586 | 543.3329         | 1084.6746      | 542.8409         | 8  |
| 5  | 528.2776         | <b>264.6425</b> | 511.2511         | 256.1292         | <b>510.2671</b>  | 255.6372         | Q    | <b>1001.6375</b> | <b>501.3224</b> | 984.6109  | 492.8091         |                |                  | 7  |
| 6  | 585.2991         | 293.1532        | 568.2726         | 284.6399         | 567.2885         | 284.1479         | G    | <b>873.5789</b>  | 437.2931        | 856.5524  | 428.7798         |                |                  | 6  |
| 7  | <b>787.4581</b>  | 394.2327        | <b>770.4316</b>  | 385.7194         | <b>769.4475</b>  | 385.2274         | K    | <b>816.5574</b>  | 408.7824        | 799.5309  | <b>400.2691</b>  |                |                  | 5  |
| 8  | 971.5793         | 486.2933        | <b>954.5527</b>  | 477.7800         | 953.5687         | 477.2880         | K    | <b>614.3984</b>  | 307.7028        | 597.3719  | <b>299.1896</b>  |                |                  | 4  |
| 9  | <b>1042.6164</b> | 521.8118        | <b>1025.5899</b> | 513.2986         | 1024.6058        | 512.8066         | A    | <b>430.2772</b>  | <b>215.6423</b> | 413.2507  | 207.1290         |                |                  | 3  |
| 10 | <b>1226.7376</b> | <b>613.8724</b> | <b>1209.7110</b> | 605.3592         | <b>1208.7270</b> | 604.8671         | K    | <b>359.2401</b>  | 180.1237        | 342.2136  | 171.6104         |                |                  | 2  |
| 11 |                  |                 |                  |                  |                  |                  | R    | 175.1190         | 88.0631         | 158.0924  | 79.5498          |                |                  | 1  |

MS/MS Fragmentation of **LDIMLKR**

Found in **I3L2C9**, Phospholipase D2 OS=Homo sapiens GN=PLD2 PE=2 SV=1

Match to Query 1688: 965.613128 from(483.813840,2+) intensity(56794.9336)

Title: File649 Spectrum14158 scans: 15625

Data file \\192.168.1.104\public\raw data\Elite\_01\methylation\_ZW\SW620\2013-6-18-SW620-Kpropio-methyl-IP-Fr20-ZW.mgf

Click mouse within plot area to zoom in by factor of two about that point

Or,  100 to  Da

Label all possible matches  Label matches used for scoring

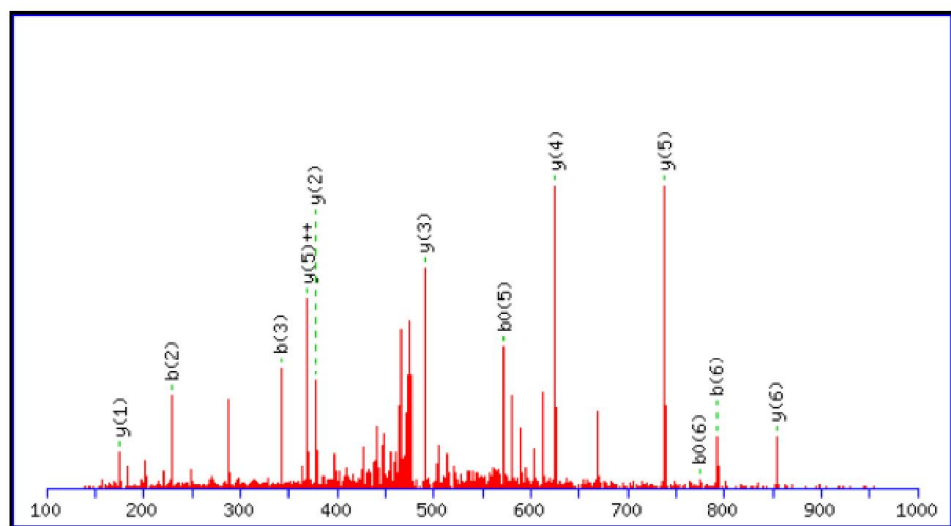

Monoisotopic mass of neutral peptide Mr(calc): 965.6125

Fixed modifications: Carbamidomethyl (C) (apply to specified residues or termini only)

Variable modifications:

M4 : Label:13C(1)2H(3) (M)

K6 : Propionyl-(13CD3)Methyl (K)

Ions Score: 35 Expect: 0.042

Matches : 12/50 fragment ions using 27 most intense peaks ([help](#))

| # | b               | b <sup>++</sup> | b*       | b <sup>*++</sup> | b <sup>0</sup>  | b <sup>0++</sup> | Seq. | y               | y <sup>++</sup> | y*       | y <sup>*++</sup> | y <sup>0</sup> | y <sup>0++</sup> | # |
|---|-----------------|-----------------|----------|------------------|-----------------|------------------|------|-----------------|-----------------|----------|------------------|----------------|------------------|---|
| 1 | 114.0913        | 57.5493         |          |                  |                 |                  | L    |                 |                 |          |                  |                |                  | 7 |
| 2 | <b>229.1183</b> | 115.0628        |          |                  | 211.1077        | 106.0575         | D    | <b>853.5357</b> | 427.2715        | 836.5092 | 418.7582         | 835.5251       | 418.2662         | 6 |
| 3 | <b>342.2023</b> | 171.6048        |          |                  | 324.1918        | 162.5995         | I    | <b>738.5088</b> | <b>369.7580</b> | 721.4822 | 361.2447         |                |                  | 5 |
| 4 | 477.2650        | 239.1361        |          |                  | 459.2545        | 230.1309         | M    | <b>625.4247</b> | 313.2160        | 608.3981 | 304.7027         |                |                  | 4 |
| 5 | 590.3491        | 295.6782        |          |                  | <b>572.3385</b> | 286.6729         | L    | <b>490.3620</b> | 245.6847        | 473.3355 | 237.1714         |                |                  | 3 |
| 6 | <b>792.5081</b> | 396.7577        | 775.4815 | 388.2444         | <b>774.4975</b> | 387.7524         | K    | <b>377.2780</b> | 189.1426        | 360.2514 | 180.6293         |                |                  | 2 |
| 7 |                 |                 |          |                  |                 |                  | R    | <b>175.1190</b> | 88.0631         | 158.0924 | 79.5498          |                |                  | 1 |

Found in **Q2PPJ7**, Ral GTPase-activating protein subunit alpha-2 OS=Homo sapiens GN=RALGAPA2 PE=1 SV=2

Match to Query 12620: 1801.964948 from(901.989750,2+) intensity(227886.9688)

Title: File394 Spectrum10738 scans: 12089

Data file \\192.168.1.104\public\raw data\Elite\_01\methylation\_ZW\SW620\2013-5-16-620-Kpropio-methyl-IP-Fr8-ZW.mgf

Click mouse within plot area to zoom in by factor of two about that point

Or,  200 to  Da Label all possible matches  Label matches used for scoring 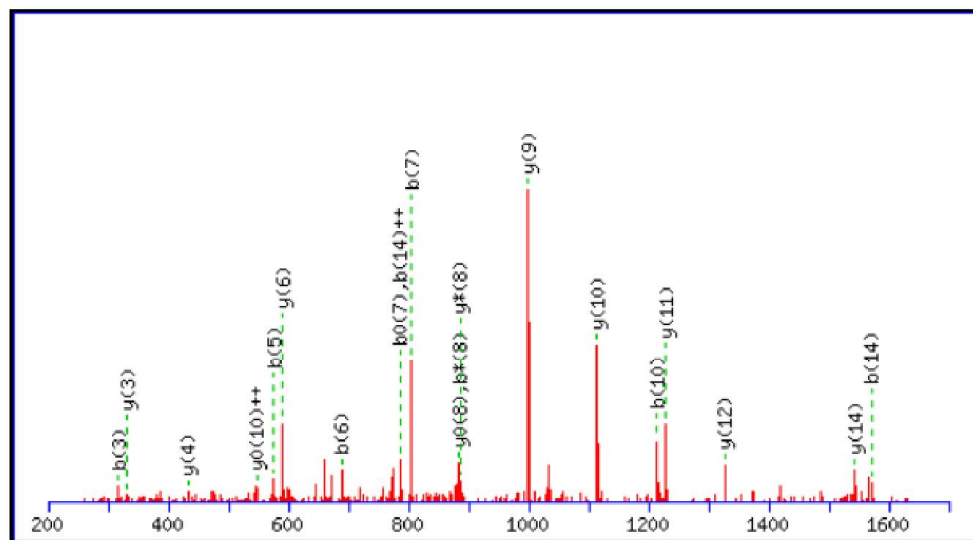

Monoisotopic mass of neutral peptide Mr(calc): 1801.9629

Fixed modifications: Carbamidomethyl (C) (apply to specified residues or termini only)

Variable modifications:

K2 : Propionyl-(13CD3)Methyl (K)

K10 : Propionyl (K)

Ions Score: 53 Expect: 0.003

Matches : 20/160 fragment ions using 28 most intense peaks ([help](#))

| #  | b                | b <sup>++</sup> | b*              | b <sup>++</sup> | b <sup>0</sup>  | b <sup>0++</sup> | Seq.     | y                | y <sup>++</sup> | y*              | y <sup>++</sup> | y <sup>0</sup>  | y <sup>0++</sup> | #  |
|----|------------------|-----------------|-----------------|-----------------|-----------------|------------------|----------|------------------|-----------------|-----------------|-----------------|-----------------|------------------|----|
| 1  | 58.0287          | 29.5180         |                 |                 |                 |                  | <b>G</b> |                  |                 |                 |                 |                 |                  | 16 |
| 2  | 260.1878         | 130.5975        | 243.1612        | 122.0842        |                 |                  | <b>K</b> | 1745.9487        | 873.4780        | 1728.9222       | 864.9647        | 1727.9382       | 864.4727         | 15 |
| 3  | <b>317.2092</b>  | 159.1082        | 300.1827        | 150.5950        |                 |                  | <b>G</b> | <b>1543.7897</b> | 772.3985        | 1526.7632       | 763.8852        | 1525.7791       | 763.3932         | 14 |
| 4  | 477.2399         | 239.1236        | 460.2133        | 230.6103        |                 |                  | <b>C</b> | 1486.7682        | 743.8878        | 1469.7417       | 735.3745        | 1468.7577       | 734.8825         | 13 |
| 5  | <b>576.3083</b>  | 288.6578        | 559.2817        | 280.1445        |                 |                  | <b>V</b> | <b>1326.7376</b> | 663.8724        | 1309.7110       | 655.3592        | 1308.7270       | 654.8672         | 12 |
| 6  | <b>689.3923</b>  | 345.1998        | 672.3658        | 336.6865        |                 |                  | <b>L</b> | <b>1227.6692</b> | 614.3382        | 1210.6426       | 605.8250        | 1209.6586       | 605.3329         | 11 |
| 7  | <b>804.4193</b>  | 402.7133        | 787.3927        | 394.2000        | <b>786.4087</b> | 393.7080         | <b>D</b> | <b>1114.5851</b> | 557.7962        | 1097.5586       | 549.2829        | 1096.5746       | <b>548.7909</b>  | 10 |
| 8  | 901.4721         | 451.2397        | <b>884.4455</b> | 442.7264        | 883.4615        | <b>442.2344</b>  | <b>P</b> | <b>999.5582</b>  | 500.2827        | 982.5316        | 491.7694        | 981.5476        | 491.2774         | 9  |
| 9  | 1029.5306        | 515.2690        | 1012.5041       | 506.7557        | 1011.5201       | 506.2637         | <b>Q</b> | 902.5054         | 451.7563        | <b>885.4789</b> | 443.2431        | <b>884.4948</b> | 442.7511         | 8  |
| 10 | <b>1213.6518</b> | 607.3295        | 1196.6253       | 598.8163        | 1195.6412       | 598.3243         | <b>K</b> | 774.4468         | 387.7271        | 757.4203        | 379.2138        | 756.4363        | 378.7218         | 7  |
| 11 | 1270.6733        | 635.8403        | 1253.6467       | 627.3270        | 1252.6627       | 626.8350         | <b>G</b> | <b>590.3257</b>  | 295.6665        | 573.2991        | 287.1532        | 572.3151        | 286.6612         | 6  |
| 12 | 1371.7210        | 686.3641        | 1354.6944       | 677.8508        | 1353.7104       | 677.3588         | <b>T</b> | 533.3042         | 267.1557        | 516.2776        | 258.6425        | 515.2936        | 258.1504         | 5  |
| 13 | 1472.7686        | 736.8880        | 1455.7421       | 728.3747        | 1454.7581       | 727.8827         | <b>T</b> | <b>432.2565</b>  | 216.6319        | 415.2300        | 208.1186        | 414.2459        | 207.6266         | 4  |
| 14 | <b>1571.8370</b> | <b>786.4222</b> | 1554.8105       | 777.9089        | 1553.8265       | 777.4169         | <b>V</b> | <b>331.2088</b>  | 166.1081        | 314.1823        | 157.5948        |                 |                  | 3  |
| 15 | 1628.8585        | 814.9329        | 1611.8320       | 806.4196        | 1610.8479       | 805.9276         | <b>G</b> | 232.1404         | 116.5738        | 215.1139        | 108.0606        |                 |                  | 2  |
| 16 |                  |                 |                 |                 |                 |                  | <b>R</b> | 175.1190         | 88.0631         | 158.0924        | 79.5498         |                 |                  | 1  |

Found in **B4DEB1**, Histone H3 OS=Homo sapiens GN=H3F3A PE=2 SV=1

Match to Query 10911: 1652.976908 from(827.495730,2+) intensity(70017.6875)

Title: File392 Spectrum6683 scans: 7707

Data file \\192.168.1.104\public\raw data\Elite\_01\methylation\_ZW\SW620\2013-5-16-620-Kpropio-methyl-IP-Fr6-ZW.mgf

Click mouse within plot area to zoom in by factor of two about that point

Or,  200 to  Da Label all possible matches  Label matches used for scoring 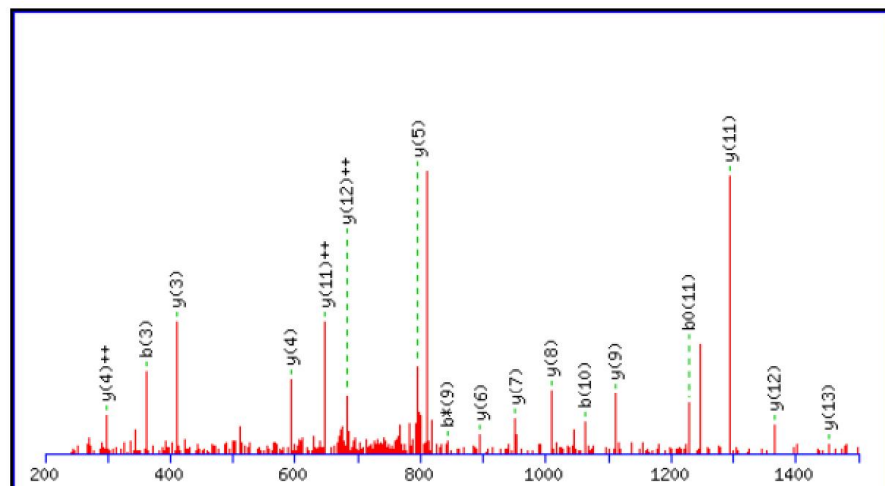

Monoisotopic mass of neutral peptide Mr(calc): 1652.9755

Fixed modifications: Carbamidomethyl (C) (apply to specified residues or termini only)

Variable modifications:

K1 : Propionyl-(13CD3)Methyl (K)

K10 : Propionyl-(13CD3)Methyl (K)

K11 : Propionyl (K)

Ions Score: 79 Expect: 3.6e-006

Matches : 17/138 fragment ions using 26 most intense peaks ([help](#))

| #  | b                | b <sup>++</sup> | b <sup>*</sup>  | b <sup>*++</sup> | b <sup>0</sup>   | b <sup>0++</sup> | Seq. | y                | y <sup>++</sup> | y <sup>*</sup> | y <sup>*++</sup> | y <sup>0</sup> | y <sup>0++</sup> | #  |
|----|------------------|-----------------|-----------------|------------------|------------------|------------------|------|------------------|-----------------|----------------|------------------|----------------|------------------|----|
| 1  | 203.1663         | 102.0868        | 186.1397        | 93.5735          |                  |                  | K    |                  |                 |                |                  |                |                  | 14 |
| 2  | 290.1983         | 145.6028        | 273.1718        | 137.0895         | 272.1878         | 136.5975         | S    | <b>1451.8238</b> | 726.4155        | 1434.7972      | 717.9023         | 1433.8132      | 717.4102         | 13 |
| 3  | <b>361.2354</b>  | 181.1214        | 344.2089        | 172.6081         | 343.2249         | 172.1161         | A    | <b>1364.7917</b> | <b>682.8995</b> | 1347.7652      | 674.3862         | 1346.7812      | 673.8942         | 12 |
| 4  | 458.2882         | 229.6477        | 441.2616        | 221.1345         | 440.2776         | 220.6425         | P    | <b>1293.7546</b> | <b>647.3810</b> | 1276.7281      | 638.8677         | 1275.7441      | 638.3757         | 11 |
| 5  | 545.3202         | 273.1637        | 528.2937        | 264.6505         | 527.3097         | 264.1585         | S    | 1196.7019        | 598.8546        | 1179.6753      | 590.3413         | 1178.6913      | 589.8493         | 10 |
| 6  | 646.3679         | 323.6876        | 629.3414        | 315.1743         | 628.3573         | 314.6823         | T    | <b>1109.6698</b> | 555.3386        | 1092.6433      | 546.8253         | 1091.6593      | 546.3333         | 9  |
| 7  | 703.3894         | 352.1983        | 686.3628        | 343.6850         | 685.3788         | 343.1930         | G    | <b>1008.6222</b> | 504.8147        | 991.5956       | 496.3014         |                |                  | 8  |
| 8  | 760.4108         | 380.7091        | 743.3843        | 372.1958         | 742.4003         | 371.7038         | G    | <b>951.6007</b>  | 476.3040        | 934.5741       | 467.7907         |                |                  | 7  |
| 9  | 859.4792         | 430.2433        | <b>842.4527</b> | 421.7300         | 841.4687         | 421.2380         | V    | <b>894.5792</b>  | 447.7933        | 877.5527       | 439.2800         |                |                  | 6  |
| 10 | <b>1061.6383</b> | 531.3228        | 1044.6117       | 522.8095         | 1043.6277        | 522.3175         | K    | <b>795.5108</b>  | 398.2590        | 778.4843       | 389.7458         |                |                  | 5  |
| 11 | 1245.7594        | 623.3834        | 1228.7329       | 614.8701         | <b>1227.7489</b> | 614.3781         | K    | <b>593.3518</b>  | <b>297.1795</b> | 576.3253       | 288.6663         |                |                  | 4  |
| 12 | 1342.8122        | 671.9097        | 1325.7857       | 663.3965         | 1324.8016        | 662.9045         | P    | <b>409.2306</b>  | 205.1190        | 392.2041       | 196.6057         |                |                  | 3  |
| 13 | 1479.8711        | 740.4392        | 1462.8446       | 731.9259         | 1461.8605        | 731.4339         | H    | 312.1779         | 156.5926        | 295.1513       | 148.0793         |                |                  | 2  |
| 14 |                  |                 |                 |                  |                  |                  | R    | 175.1190         | 88.0631         | 158.0924       | 79.5498          |                |                  | 1  |



MS/MS Fragmentation of **SKDMYHASKSAKR**

Found in **Q8N5A5**, Zinc finger CCCH-type with G patch domain-containing protein OS=Homo sapiens GN=ZGPAT PE=1 SV=3

Match to Query 11597: 1697.896828 from(849.955690,2+) intensity(25783.1309)

Title: File392 Spectrum7778 scans: 8884

Data file \\192.168.1.104\public\raw data\Elite\_01\methylation\_ZW\SW620\2013-5-16-620-Kpropio-methyl-IP-Fr6-ZW.mgf

Click mouse within plot area to zoom in by factor of two about that point

Or,  200  1700

Label all possible matches  Label matches used for scoring

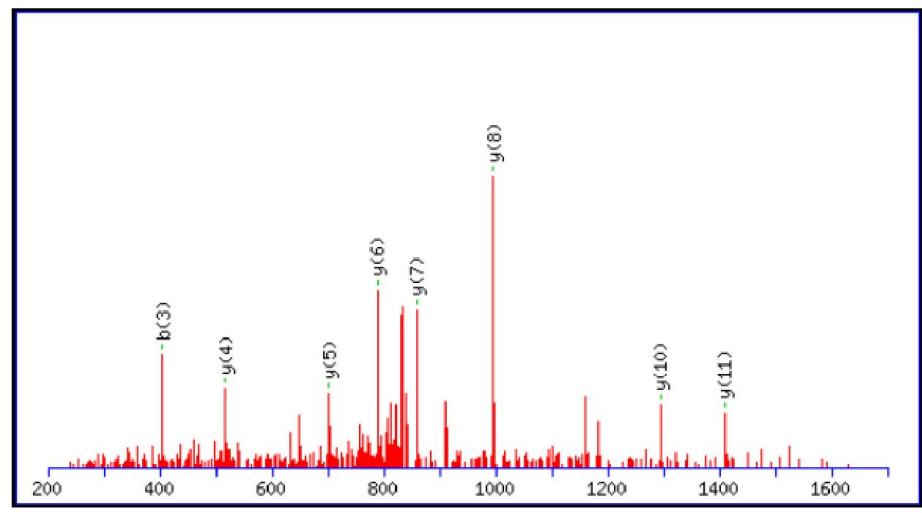

Monoisotopic mass of neutral peptide Mr(calc): 1697.8952

Fixed modifications: Carbamidomethyl (C) (apply to specified residues or termini only)

Variable modifications:

- K2 : Propionyl-(13CD3)Methyl (K)
- M4 : Label:13C(1)2H(3) (M)
- K9 : Propionyl (K)
- K12 : Propionyl (K)

Ions Score: 39 Expect: 0.07

Matches : 8/136 fragment ions using 14 most intense peaks [\(help\)](#)

| #  | b               | b <sup>++</sup> | b <sup>+</sup> | b <sup>*++</sup> | b <sup>0</sup> | b <sup>0++</sup> | Seq. | y                | y <sup>++</sup> | y <sup>+</sup> | y <sup>*++</sup> | y <sup>0</sup> | y <sup>0++</sup> | #  |
|----|-----------------|-----------------|----------------|------------------|----------------|------------------|------|------------------|-----------------|----------------|------------------|----------------|------------------|----|
| 1  | 88.0393         | 44.5233         |                |                  | 70.0287        | 35.5180          | S    |                  |                 |                |                  |                |                  | 13 |
| 2  | 290.1983        | 145.6028        | 273.1718       | 137.0895         | 272.1878       | 136.5975         | K    | 1611.8705        | 806.4389        | 1594.8439      | 797.9256         | 1593.8599      | 797.4336         | 12 |
| 3  | <b>405.2253</b> | 203.1163        | 388.1987       | 194.6030         | 387.2147       | 194.1110         | D    | <b>1409.7114</b> | 705.3594        | 1392.6849      | 696.8461         | 1391.7009      | 696.3541         | 11 |
| 4  | 540.2879        | 270.6476        | 523.2614       | 262.1343         | 522.2774       | 261.6423         | M    | <b>1294.6845</b> | 647.8459        | 1277.6580      | 639.3326         | 1276.6739      | 638.8406         | 10 |
| 5  | 703.3513        | 352.1793        | 686.3247       | 343.6660         | 685.3407       | 343.1740         | Y    | 1159.6218        | 580.3146        | 1142.5953      | 571.8013         | 1141.6113      | 571.3093         | 9  |
| 6  | 840.4102        | 420.7087        | 823.3836       | 412.1954         | 822.3996       | 411.7034         | H    | <b>996.5585</b>  | 498.7829        | 979.5320       | 490.2696         | 978.5479       | 489.7776         | 8  |
| 7  | 911.4473        | 456.2273        | 894.4207       | 447.7140         | 893.4367       | 447.2220         | A    | <b>859.4996</b>  | 430.2534        | 842.4730       | 421.7402         | 841.4890       | 421.2482         | 7  |
| 8  | 998.4793        | 499.7433        | 981.4528       | 491.2300         | 980.4687       | 490.7380         | S    | <b>788.4625</b>  | 394.7349        | 771.4359       | 386.2216         | 770.4519       | 385.7296         | 6  |
| 9  | 1182.6005       | 591.8039        | 1165.5739      | 583.2906         | 1164.5899      | 582.7986         | K    | <b>701.4305</b>  | 351.2189        | 684.4039       | 342.7056         | 683.4199       | 342.2136         | 5  |
| 10 | 1269.6325       | 635.3199        | 1252.6060      | 626.8066         | 1251.6220      | 626.3146         | S    | <b>517.3093</b>  | 259.1583        | 500.2827       | 250.6450         | 499.2987       | 250.1530         | 4  |
| 11 | 1340.6696       | 670.8385        | 1323.6431      | 662.3252         | 1322.6591      | 661.8332         | A    | 430.2772         | 215.6423        | 413.2507       | 207.1290         |                |                  | 3  |
| 12 | 1524.7908       | 762.8990        | 1507.7643      | 754.3858         | 1506.7802      | 753.8938         | K    | 359.2401         | 180.1237        | 342.2136       | 171.6104         |                |                  | 2  |
| 13 |                 |                 |                |                  |                |                  | R    | 175.1190         | 88.0631         | 158.0924       | 79.5498          |                |                  | 1  |

Found in **P47914**, 60S ribosomal protein L29 OS=Homo sapiens GN=RPL29 PE=1 SV=2

Match to Query 10031: 1693.878148 from(847.946350,2+) intensity(986363.2500)

Title: File658 Spectrum1707 scans: 2510

Data file \\192.168.1.104\public\raw data\Elite\_01\methylation\_ZW\SW620\2013-6-18-SW620-Kpropio-methyl-IP-Fr17-ZW.mgf

Click mouse within plot area to zoom in by factor of two about that point

Or,  200 to  Da Label all possible matches  Label matches used for scoring 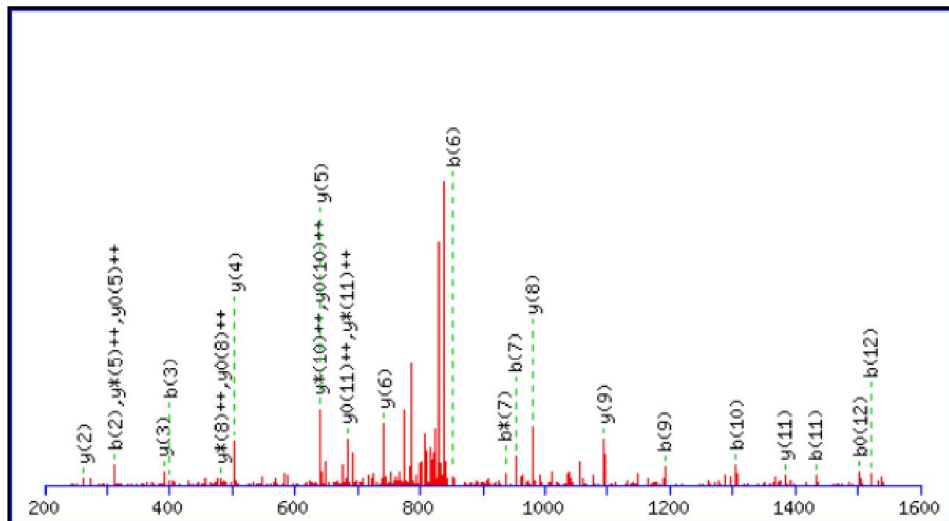Monoisotopic mass of neutral peptide  $M_r(\text{calc})$ : 1693.8768

Fixed modifications: Carbamidomethyl (C) (apply to specified residues or termini only)

Variable modifications:

N-term : Propionyl (protein N-term) (Protein N-term)

K2 : Propionyl (K)

K4 : Propionyl-(13CD3)Methyl (R)

Ions Score: 81 Expect: 3.8e-006

Matches : 26/136 fragment ions using 26 most intense peaks ([help](#))

| #  | b                | b <sup>++</sup> | b*              | b <sup>+++</sup> | b <sup>0</sup>   | b <sup>0++</sup> | Seq. | y                | y <sup>++</sup> | y*        | y <sup>+++</sup> | y <sup>0</sup> | y <sup>0++</sup> | #  |
|----|------------------|-----------------|-----------------|------------------|------------------|------------------|------|------------------|-----------------|-----------|------------------|----------------|------------------|----|
| 1  | 128.0706         | 64.5389         |                 |                  |                  |                  | A    |                  |                 |           |                  |                |                  | 13 |
| 2  | <b>312.1918</b>  | 156.5995        | 295.1652        | 148.0863         |                  |                  | K    | 1567.8208        | 784.4140        | 1550.7943 | 775.9008         | 1549.8102      | 775.4088         | 12 |
| 3  | <b>399.2238</b>  | 200.1155        | 382.1973        | 191.6023         | 381.2132         | 191.1103         | S    | <b>1383.6996</b> | 692.3535        | 1366.6731 | <b>683.8402</b>  | 1365.6891      | <b>683.3482</b>  | 11 |
| 4  | 601.3828         | 301.1951        | 584.3563        | 292.6818         | 583.3723         | 292.1898         | K    | 1296.6676        | 648.8374        | 1279.6411 | <b>640.3242</b>  | 1278.6570      | <b>639.8322</b>  | 10 |
| 5  | 715.4258         | 358.2165        | 698.3992        | 349.7032         | 697.4152         | 349.2112         | N    | <b>1094.5086</b> | 547.7579        | 1077.4820 | 539.2447         | 1076.4980      | 538.7527         | 9  |
| 6  | <b>852.4847</b>  | 426.7460        | 835.4581        | 418.2327         | 834.4741         | 417.7407         | H    | <b>980.4657</b>  | 490.7365        | 963.4391  | <b>482.2232</b>  | 962.4551       | <b>481.7312</b>  | 8  |
| 7  | <b>953.5323</b>  | 477.2698        | <b>936.5058</b> | 468.7565         | 935.5218         | 468.2645         | T    | 843.4068         | 422.2070        | 826.3802  | 413.6937         | 825.3962       | 413.2017         | 7  |
| 8  | 1054.5800        | 527.7936        | 1037.5535       | 519.2804         | 1036.5695        | 518.7884         | T    | <b>742.3591</b>  | 371.6832        | 725.3325  | 363.1699         | 724.3485       | 362.6779         | 6  |
| 9  | <b>1191.6389</b> | 596.3231        | 1174.6124       | 587.8098         | 1173.6284        | 587.3178         | H    | <b>641.3114</b>  | 321.1593        | 624.2848  | <b>312.6461</b>  | 623.3008       | <b>312.1541</b>  | 5  |
| 10 | <b>1305.6819</b> | 653.3446        | 1288.6553       | 644.8313         | 1287.6713        | 644.3393         | N    | <b>504.2525</b>  | 252.6299        | 487.2259  | 244.1166         | 486.2419       | 243.6246         | 4  |
| 11 | <b>1433.7404</b> | 717.3739        | 1416.7139       | 708.8606         | 1415.7299        | 708.3686         | Q    | <b>390.2096</b>  | 195.6084        | 373.1830  | 187.0951         | 372.1990       | 186.6031         | 3  |
| 12 | <b>1520.7725</b> | 760.8899        | 1503.7459       | 752.3766         | <b>1502.7619</b> | 751.8846         | S    | <b>262.1510</b>  | 131.5791        | 245.1244  | 123.0659         | 244.1404       | 122.5738         | 2  |
| 13 |                  |                 |                 |                  |                  |                  | R    | 175.1190         | 88.0631         | 158.0924  | 79.5498          |                |                  | 1  |

MS/MS Fragmentation of **KQVAKKSTSR**

Found in **E9PRF4**, Histone-lysine N-methyltransferase SETDB1 (Fragment) OS=Homo sapiens GN=SETDB1 PE=2 SV=1

Match to Query 6806: 1464.857768 from(733.436160,2+) intensity(27188.8887)

Title: File440 Spectrum10055 scans: 11410

Data file \\192.168.1.104\public\raw data\Elite\_01\methylation\_ZW\SW620\2013-6-5-SW620-Kpropio-methyl-IP-Fr11-ZW.mgf

Click mouse within plot area to zoom in by factor of two about that point

Or,  200 to  Da

Label all possible matches  Label matches used for scoring

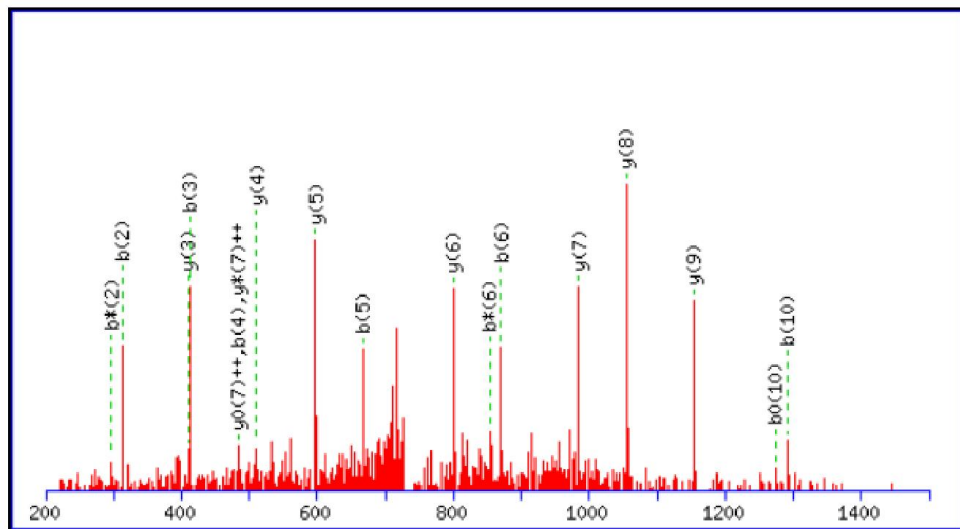

Monoisotopic mass of neutral peptide Mr(calc): 1464.8573

Fixed modifications: Carbamidomethyl (C) (apply to specified residues or termini only)

Variable modifications:

- K1 : Propionyl (K)
- K5 : Propionyl (K)
- K6 : Propionyl-(13CD3)Methyl (K)

Ions Score: 48 Expect: 0.0052

Matches : 18/104 fragment ions using 25 most intense peaks [\(help\)](#)

| #  | b                | b <sup>++</sup> | b*              | b <sup>+++</sup> | b <sup>0</sup>   | b <sup>0++</sup> | Seq. | y                | y <sup>++</sup> | y*        | y <sup>+++</sup> | y <sup>0</sup> | y <sup>0++</sup> | #  |
|----|------------------|-----------------|-----------------|------------------|------------------|------------------|------|------------------|-----------------|-----------|------------------|----------------|------------------|----|
| 1  | 185.1285         | 93.0679         | 168.1019        | 84.5546          |                  |                  | K    |                  |                 |           |                  |                |                  | 11 |
| 2  | <b>313.1870</b>  | 157.0972        | <b>296.1605</b> | 148.5839         |                  |                  | Q    | 1281.7434        | 641.3753        | 1264.7168 | 632.8621         | 1263.7328      | 632.3701         | 10 |
| 3  | <b>412.2554</b>  | 206.6314        | 395.2289        | 198.1181         |                  |                  | V    | <b>1153.6848</b> | 577.3460        | 1136.6583 | 568.8328         | 1135.6743      | 568.3408         | 9  |
| 4  | <b>483.2926</b>  | 242.1499        | 466.2660        | 233.6366         |                  |                  | A    | <b>1054.6164</b> | 527.8118        | 1037.5899 | 519.2986         | 1036.6058      | 518.8066         | 8  |
| 5  | <b>667.4137</b>  | 334.2105        | 650.3872        | 325.6972         |                  |                  | K    | <b>983.5793</b>  | 492.2933        | 966.5527  | <b>483.7800</b>  | 965.5687       | <b>483.2880</b>  | 7  |
| 6  | <b>869.5728</b>  | 435.2900        | <b>852.5462</b> | 426.7767         |                  |                  | K    | <b>799.4581</b>  | 400.2327        | 782.4316  | 391.7194         | 781.4475       | 391.2274         | 6  |
| 7  | 956.6048         | 478.8060        | 939.5782        | 470.2928         | 938.5942         | 469.8007         | S    | <b>597.2991</b>  | 299.1532        | 580.2726  | 290.6399         | 579.2885       | 290.1479         | 5  |
| 8  | 1057.6525        | 529.3299        | 1040.6259       | 520.8166         | 1039.6419        | 520.3246         | T    | <b>510.2671</b>  | 255.6372        | 493.2405  | 247.1239         | 492.2565       | 246.6319         | 4  |
| 9  | 1144.6845        | 572.8459        | 1127.6579       | 564.3326         | 1126.6739        | 563.8406         | S    | <b>409.2194</b>  | 205.1133        | 392.1928  | 196.6001         | 391.2088       | 196.1081         | 3  |
| 10 | <b>1291.7529</b> | 646.3801        | 1274.7264       | 637.8668         | <b>1273.7423</b> | 637.3748         | F    | 322.1874         | 161.5973        | 305.1608  | 153.0840         |                |                  | 2  |
| 11 |                  |                 |                 |                  |                  |                  | R    | 175.1190         | 88.0631         | 158.0924  | 79.5498          |                |                  | 1  |

Match to Query 19843: 2897.590362 from(966.870730,3+) intensity(230322.1563)

Title: File440 Spectrum18095 scans: 20210

Data file \\192.168.1.104\public\raw data\Elite\_01\methylation\_ZW\SW620\2013-6-5-SW620-Kpropio-methyl-IP-Fr11-ZW.mgf

Click mouse within plot area to zoom in by factor of two about that point

Or,  200  2000

Label all possible matches  Label matches used for scoring

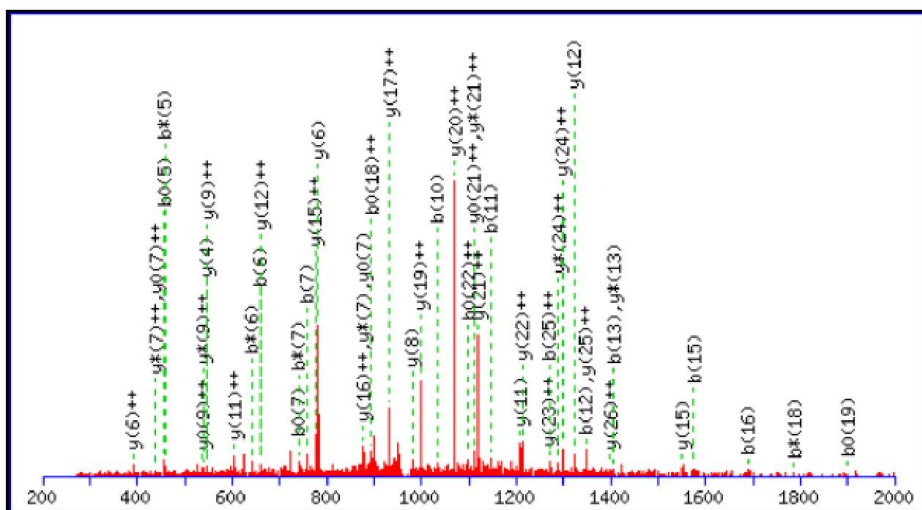

Monoisotopic mass of neutral peptide Mr(calcd): 2897.5884

Fixed modifications: Carbamidomethyl (C) (apply to specified residues or term)

Variable modifications:

K6 : Propionyl (K)

K12 : Propionyl-(13CD3)Methyl (K)

K26 : Propionyl (K)

Ions Score: 58 Expect: 0.0009

Matches : 49/300 fragment ions using 105 most intense peaks [\(help\)](#)

| #  | b         | b <sup>++</sup> | b <sup>*</sup> | b <sup>***</sup> | b <sup>0</sup> | b <sup>0++</sup> | Seq. | y         | y <sup>++</sup> | y <sup>*</sup> | y <sup>***</sup> | y <sup>0</sup> | y <sup>0++</sup> | #  |
|----|-----------|-----------------|----------------|------------------|----------------|------------------|------|-----------|-----------------|----------------|------------------|----------------|------------------|----|
| 1  | 102.0550  | 51.5311         |                |                  | 84.0444        | 42.5258          | T    |           |                 |                |                  |                |                  | 27 |
| 2  | 203.1026  | 102.0550        |                |                  | 185.0921       | 93.0497          | T    | 2797.5479 | 1399.2776       | 2780.5214      | 1390.7643        | 2779.5374      | 1390.2723        | 26 |
| 3  | 304.1503  | 152.5788        |                |                  | 286.1397       | 143.5735         | T    | 2696.5003 | 1348.7538       | 2679.4737      | 1340.2405        | 2678.4897      | 1339.7485        | 25 |
| 4  | 361.1718  | 181.0895        |                |                  | 343.1612       | 172.0842         | G    | 2595.4526 | 1298.2299       | 2578.4260      | 1289.7167        | 2577.4420      | 1289.2246        | 24 |
| 5  | 475.2147  | 238.1110        | 458.1882       | 229.5977         | 457.2041       | 229.1057         | N    | 2538.4311 | 1269.7192       | 2521.4046      | 1261.2059        | 2520.4206      | 1260.7139        | 23 |
| 6  | 659.3359  | 330.1716        | 642.3093       | 321.6583         | 641.3253       | 321.1663         | K    | 2424.3882 | 1212.6977       | 2407.3616      | 1204.1845        | 2406.3776      | 1203.6925        | 22 |
| 7  | 758.4043  | 379.7058        | 741.3777       | 371.1925         | 740.3937       | 370.7005         | V    | 2240.2670 | 1120.6371       | 2223.2405      | 1112.1239        | 2222.2564      | 1111.6319        | 21 |
| 8  | 905.4727  | 453.2400        | 888.4462       | 444.7267         | 887.4621       | 444.2347         | F    | 2141.1986 | 1071.1029       | 2124.1721      | 1062.5897        | 2123.1880      | 1062.0977        | 20 |
| 9  | 962.4942  | 481.7507        | 945.4676       | 473.2375         | 944.4836       | 472.7454         | G    | 1994.1302 | 997.5687        | 1977.1036      | 989.0555         | 1976.1196      | 988.5634         | 19 |
| 10 | 1033.5313 | 517.2693        | 1016.5047      | 508.7560         | 1015.5207      | 508.2640         | A    | 1937.1087 | 969.0580        | 1920.0822      | 960.5447         | 1919.0982      | 960.0527         | 18 |
| 11 | 1146.6154 | 573.8113        | 1129.5888      | 565.2980         | 1128.6048      | 564.8060         | L    | 1866.0716 | 933.5394        | 1849.0451      | 925.0262         | 1848.0610      | 924.5342         | 17 |
| 12 | 1348.7744 | 674.8908        | 1331.7478      | 666.3775         | 1330.7638      | 665.8855         | K    | 1752.9875 | 876.9974        | 1735.9610      | 868.4841         | 1734.9770      | 867.9921         | 16 |
| 13 | 1405.7958 | 703.4016        | 1388.7693      | 694.8883         | 1387.7853      | 694.3963         | G    | 1550.8285 | 775.9179        | 1533.8020      | 767.4046         | 1532.8180      | 766.9126         | 15 |
| 14 | 1476.8329 | 738.9201        | 1459.8064      | 730.4068         | 1458.8224      | 729.9148         | A    | 1493.8071 | 747.4072        | 1476.7805      | 738.8939         | 1475.7965      | 738.4019         | 14 |
| 15 | 1575.9014 | 788.4543        | 1558.8748      | 779.9410         | 1557.8908      | 779.4490         | V    | 1422.7700 | 711.8886        | 1405.7434      | 703.3753         | 1404.7594      | 702.8833         | 13 |
| 16 | 1690.9283 | 845.9678        | 1673.9018      | 837.4545         | 1672.9177      | 836.9625         | D    | 1323.7015 | 662.3544        | 1306.6750      | 653.8411         | 1305.6910      | 653.3491         | 12 |
| 17 | 1747.9498 | 874.4785        | 1730.9232      | 865.9652         | 1729.9392      | 865.4732         | G    | 1208.6746 | 604.8409        | 1191.6480      | 596.3277         | 1190.6640      | 595.8357         | 11 |
| 18 | 1804.9712 | 902.9893        | 1787.9447      | 894.4760         | 1786.9607      | 893.9840         | G    | 1151.6531 | 576.3302        | 1134.6266      | 567.8169         | 1133.6426      | 567.3249         | 10 |
| 19 | 1918.0553 | 959.5313        | 1901.0287      | 951.0180         | 1900.0447      | 950.5260         | L    | 1094.6317 | 547.8195        | 1077.6051      | 539.3062         | 1076.6211      | 538.8142         | 9  |
| 20 | 2005.0873 | 1003.0473       | 1988.0608      | 994.5340         | 1987.0768      | 994.0420         | S    | 981.5476  | 491.2774        | 964.5211       | 482.7642         | 963.5370       | 482.2722         | 8  |
| 21 | 2118.1714 | 1059.5893       | 2101.1448      | 1051.0761        | 2100.1608      | 1050.5840        | I    | 894.5156  | 447.7614        | 877.4890       | 439.2482         | 876.5050       | 438.7561         | 7  |
| 22 | 2215.2241 | 1108.1157       | 2198.1976      | 1099.6024        | 2197.2136      | 1099.1104        | P    | 781.4315  | 391.2194        | 764.4050       | 382.7061         | 763.4209       | 382.2141         | 6  |
| 23 | 2352.2831 | 1176.6452       | 2335.2565      | 1168.1319        | 2334.2725      | 1167.6399        | H    | 684.3787  | 342.6930        | 667.3522       | 334.1797         | 666.3682       | 333.6877         | 5  |
| 24 | 2439.3151 | 1220.1612       | 2422.2885      | 1211.6479        | 2421.3045      | 1211.1559        | S    | 547.3198  | 274.1636        | 530.2933       | 265.6503         | 529.3093       | 265.1583         | 4  |
| 25 | 2540.3628 | 1270.6850       | 2523.3362      | 1262.1717        | 2522.3522      | 1261.6797        | T    | 460.2878  | 230.6475        | 443.2613       | 222.1343         | 442.2772       | 221.6423         | 3  |
| 26 | 2724.4839 | 1362.7456       | 2707.4574      | 1354.2323        | 2706.4734      | 1353.7403        | K    | 359.2401  | 180.1237        | 342.2136       | 171.6104         |                |                  | 2  |
| 27 |           |                 |                |                  |                |                  | R    | 175.1190  | 88.0631         | 158.0924       | 79.5498          |                |                  | 1  |

Match to Query 15638: 2202.249368 from(1102.131960,2+) intensity(60800.7969)

Title: File669 Spectrum17598 scans: 19485

Data file \\192.168.1.104\public\raw data\Elite\_01\methylation\_ZW\SW620\2013-6-18-SW620-Kpropio-methyl-IP-Fr1-ZW.mgf

Click mouse within plot area to zoom in by factor of two about that point

Or,  300  2000  Label all possible matches  Label matches used for scoring 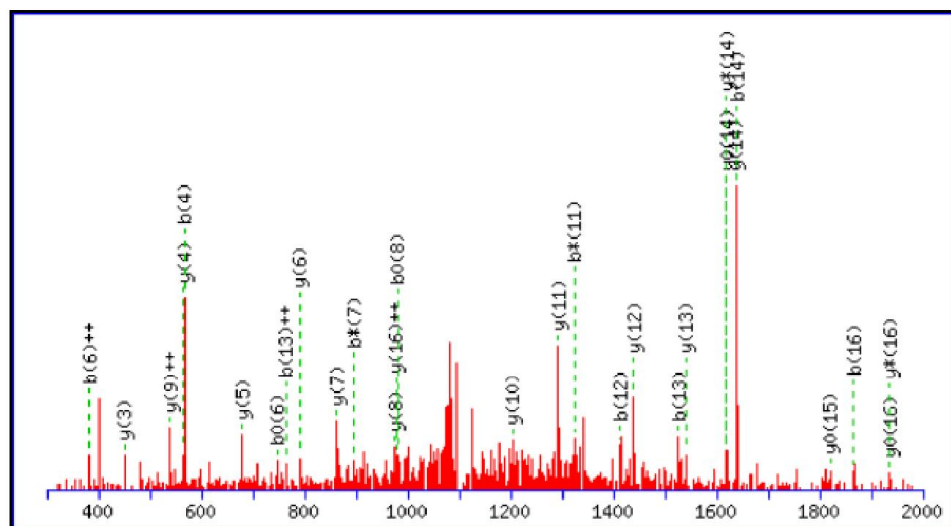

Monoisotopic mass of neutral peptide Mr(calc): 2202.2433

Fixed modifications: Carbamidomethyl (C) (apply to specified residue)

Variable modifications:

K4 : Propionyl-(13CD3)Methyl (K)

Ions Score: 41 Expect: 0.032

Matches : 29/174 fragment ions using 68 most intense peaks [\(help\)](#)

| #  | b         | b <sup>++</sup> | b*        | b <sup>++</sup> | b <sup>0</sup> | b <sup>0++</sup> | Seq. | y         | y <sup>++</sup> | y*        | y <sup>++</sup> | y <sup>0</sup> | y <sup>0++</sup> | #  |
|----|-----------|-----------------|-----------|-----------------|----------------|------------------|------|-----------|-----------------|-----------|-----------------|----------------|------------------|----|
| 1  | 114.0913  | 57.5493         |           |                 |                |                  | L    |           |                 |           |                 |                |                  | 18 |
| 2  | 251.1503  | 126.0788        |           |                 |                |                  | H    | 2090.1666 | 1045.5869       | 2073.1400 | 1037.0736       | 2072.1560      | 1036.5816        | 17 |
| 3  | 365.1932  | 183.1002        | 348.1666  | 174.5870        |                |                  | N    | 1953.1077 | 977.0575        | 1936.0811 | 968.5442        | 1935.0971      | 968.0522         | 16 |
| 4  | 567.3522  | 284.1797        | 550.3256  | 275.6665        |                |                  | K    | 1839.0647 | 920.0360        | 1822.0382 | 911.5227        | 1821.0542      | 911.0307         | 15 |
| 5  | 664.4050  | 332.7061        | 647.3784  | 324.1928        |                |                  | P    | 1636.9057 | 818.9565        | 1619.8792 | 810.4432        | 1618.8952      | 809.9512         | 14 |
| 6  | 765.4526  | 383.2300        | 748.4261  | 374.7167        | 747.4421       | 374.2247         | T    | 1539.8530 | 770.4301        | 1522.8264 | 761.9168        | 1521.8424      | 761.4248         | 13 |
| 7  | 912.5210  | 456.7642        | 895.4945  | 448.2509        | 894.5105       | 447.7589         | F    | 1438.8053 | 719.9063        | 1421.7787 | 711.3930        | 1420.7947      | 710.9010         | 12 |
| 8  | 999.5531  | 500.2802        | 982.5265  | 491.7669        | 981.5425       | 491.2749         | S    | 1291.7369 | 646.3721        | 1274.7103 | 637.8588        | 1273.7263      | 637.3668         | 11 |
| 9  | 1127.6117 | 564.3095        | 1110.5851 | 555.7962        | 1109.6011      | 555.3042         | Q    | 1204.7048 | 602.8561        | 1187.6783 | 594.3428        | 1186.6943      | 593.8508         | 10 |
| 10 | 1228.6593 | 614.8333        | 1211.6328 | 606.3200        | 1210.6488      | 605.8280         | T    | 1076.6463 | 538.8268        | 1059.6197 | 530.3135        | 1058.6357      | 529.8215         | 9  |
| 11 | 1341.7434 | 671.3753        | 1324.7168 | 662.8621        | 1323.7328      | 662.3701         | I    | 975.5986  | 488.3029        | 958.5720  | 479.7897        |                |                  | 8  |
| 12 | 1412.7805 | 706.8939        | 1395.7540 | 698.3806        | 1394.7699      | 697.8886         | A    | 862.5145  | 431.7609        | 845.4880  | 423.2476        |                |                  | 7  |
| 13 | 1525.8646 | 763.4359        | 1508.8380 | 754.9227        | 1507.8540      | 754.4306         | L    | 791.4774  | 396.2423        | 774.4509  | 387.7291        |                |                  | 6  |
| 14 | 1638.9486 | 819.9780        | 1621.9221 | 811.4647        | 1620.9381      | 810.9727         | L    | 678.3933  | 339.7003        | 661.3668  | 331.1870        |                |                  | 5  |
| 15 | 1752.9916 | 876.9994        | 1735.9650 | 868.4861        | 1734.9810      | 867.9941         | N    | 565.3093  | 283.1583        | 548.2827  | 274.6450        |                |                  | 4  |
| 16 | 1866.0756 | 933.5415        | 1849.0491 | 925.0282        | 1848.0651      | 924.5362         | I    | 451.2663  | 226.1368        | 434.2398  | 217.6235        |                |                  | 3  |
| 17 | 2029.1390 | 1015.0731       | 2012.1124 | 1006.5598       | 2011.1284      | 1006.0678        | Y    | 338.1823  | 169.5948        | 321.1557  | 161.0815        |                |                  | 2  |
| 18 |           |                 |           |                 |                |                  | R    | 175.1190  | 88.0631         | 158.0924  | 79.5498         |                |                  | 1  |

Found in **Q9GZY0**, Nuclear RNA export factor 2 OS=Homo sapiens GN=NXF2 PE=1 SV=1

Match to Query 6900: 1407.700648 from(704.857600,2+) intensity(51287.1406)

Title: File314 Spectrum7796 scans: 9406

Data file \\192.168.1.104\public\raw data\Elite\_01\methylation\_ZW\k562\2013-5-23-K562-Kpropio-methyl-IP-Fr9-ZW.mgf

Click mouse within plot area to zoom in by factor of two about that point

Or, Plot from  to  Da Label all possible matches  Label matches used for scoring 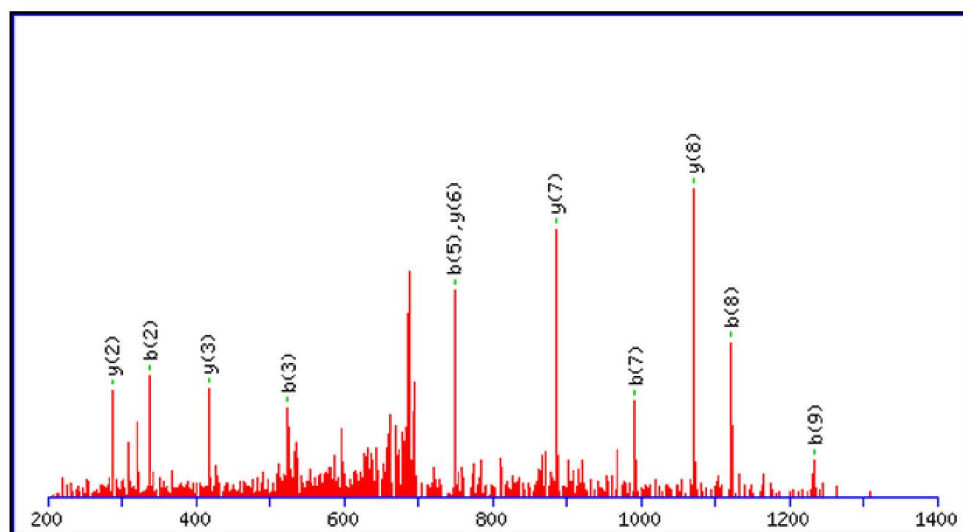

Monoisotopic mass of neutral peptide Mr(calc): 1407.6998

Fixed modifications: Carbamidomethyl (C) (apply to specified residues or termini only)

Variable modifications:

M1 : Label:13C(1)2H(3)

K2 : Propionyl-(13CD3)M

Ions Score: 52 Expect: 0.0

Matches : 11/94 fragment id

| #  | b                | b <sup>++</sup> | b*        | b <sup>+++</sup> | b <sup>0</sup> | b <sup>0++</sup> | Seq. | y                | y <sup>++</sup> | y*        | y <sup>+++</sup> | y <sup>0</sup> | y <sup>0++</sup> | #  |
|----|------------------|-----------------|-----------|------------------|----------------|------------------|------|------------------|-----------------|-----------|------------------|----------------|------------------|----|
| 1  | 136.0699         | 68.5386         |           |                  |                |                  | M    |                  |                 |           |                  |                |                  | 10 |
| 2  | <b>338.2290</b>  | 169.6181        | 321.2024  | 161.1048         |                |                  | K    | 1273.6444        | 637.3258        | 1256.6179 | 628.8126         | 1255.6338      | 628.3206         | 9  |
| 3  | <b>524.3083</b>  | 262.6578        | 507.2817  | 254.1445         |                |                  | W    | <b>1071.4854</b> | 536.2463        | 1054.4588 | 527.7331         | 1053.4748      | 527.2411         | 8  |
| 4  | 661.3672         | 331.1872        | 644.3406  | 322.6740         |                |                  | H    | <b>885.4061</b>  | 443.2067        | 868.3795  | 434.6934         | 867.3955       | 434.2014         | 7  |
| 5  | <b>748.3992</b>  | 374.7032        | 731.3727  | 366.1900         | 730.3886       | 365.6980         | S    | <b>748.3472</b>  | 374.6772        | 731.3206  | 366.1640         | 730.3366       | 365.6719         | 6  |
| 6  | 877.4418         | 439.2245        | 860.4153  | 430.7113         | 859.4312       | 430.2193         | E    | 661.3151         | 331.1612        | 644.2886  | 322.6479         | 643.3046       | 322.1559         | 5  |
| 7  | <b>992.4687</b>  | 496.7380        | 975.4422  | 488.2247         | 974.4582       | 487.7327         | D    | 532.2726         | 266.6399        | 515.2460  | 258.1266         | 514.2620       | 257.6346         | 4  |
| 8  | <b>1121.5113</b> | 561.2593        | 1104.4848 | 552.7460         | 1103.5008      | 552.2540         | E    | <b>417.2456</b>  | 209.1264        | 400.2191  | 200.6132         | 399.2350       | 200.1212         | 3  |
| 9  | <b>1234.5954</b> | 617.8013        | 1217.5689 | 609.2881         | 1216.5848      | 608.7961         | I    | <b>288.2030</b>  | 144.6051        | 271.1765  | 136.0919         |                |                  | 2  |
| 10 |                  |                 |           |                  |                |                  | R    | 175.1190         | 88.0631         | 158.0924  | 79.5498          |                |                  | 1  |

Found in **MOQXA7**, Protein Wiz OS=Homo sapiens GN=WIZ PE=4 SV=1

Match to Query 5727: 1304.748028 from(653.381290,2+) intensity(35976.8203)

Title: File314 Spectrum5313 scans: 6757

Data file \\192.168.1.104\public\raw data\Elite\_01\methylation\_ZW\k562\2013-5-23-K562-Kpropio-methyl-IP-Fr9-ZW.mgf

Click mouse within plot area to zoom in by factor of two about that point

Or, Plot from  to  Da Label all possible matches  Label matches used for scoring 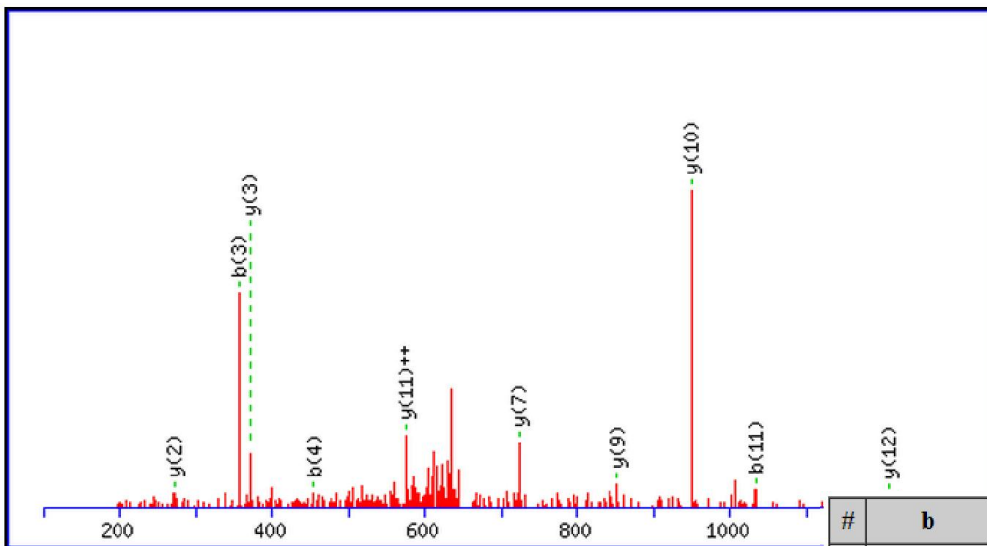

Monoisotopic mass of neutral peptide Mr(calc): 1304.7474

Fixed modifications: Carbamidomethyl (C) (apply to specif

Variable modifications:

K3 : Propionyl-(13CD3)Methyl (K)

Ions Score: 31 Expect: 0.32

Matches : 10/92 fragment ions using 22 most intense peaks

| #  | b                | b <sup>++</sup> | b <sup>*</sup> | b <sup>*++</sup> | Seq. | y                | y <sup>++</sup> | y <sup>*</sup> | y <sup>*++</sup> | #  |
|----|------------------|-----------------|----------------|------------------|------|------------------|-----------------|----------------|------------------|----|
| 1  | 98.0600          | 49.5337         |                |                  | P    |                  |                 |                |                  | 13 |
| 2  | 155.0815         | 78.0444         |                |                  | G    | <b>1208.7019</b> | 604.8546        | 1191.6753      | 596.3413         | 12 |
| 3  | <b>357.2405</b>  | 179.1239        | 340.2140       | 170.6106         | K    | 1151.6804        | <b>576.3438</b> | 1134.6539      | 567.8306         | 11 |
| 4  | <b>454.2933</b>  | 227.6503        | 437.2667       | 219.1370         | P    | <b>949.5214</b>  | 475.2643        | 932.4948       | 466.7511         | 10 |
| 5  | 511.3147         | 256.1610        | 494.2882       | 247.6477         | G    | <b>852.4686</b>  | 426.7380        | 835.4421       | 418.2247         | 9  |
| 6  | 582.3519         | 291.6796        | 565.3253       | 283.1663         | A    | 795.4472         | 398.2272        | 778.4206       | 389.7139         | 8  |
| 7  | 639.3733         | 320.1903        | 622.3468       | 311.6770         | G    | <b>724.4101</b>  | 362.7087        | 707.3835       | 354.1954         | 7  |
| 8  | 736.4261         | 368.7167        | 719.3995       | 360.2034         | P    | 667.3886         | 334.1979        | 650.3620       | 325.6847         | 6  |
| 9  | 807.4632         | 404.2352        | 790.4367       | 395.7220         | A    | 570.3358         | 285.6715        | 553.3093       | 277.1583         | 5  |
| 10 | 935.5218         | 468.2645        | 918.4952       | 459.7513         | Q    | 499.2987         | 250.1530        | 482.2722       | 241.6397         | 4  |
| 11 | <b>1034.5902</b> | 517.7987        | 1017.5636      | 509.2855         | V    | <b>371.2401</b>  | 186.1237        | 354.2136       | 177.6104         | 3  |
| 12 | 1131.6430        | 566.3251        | 1114.6164      | 557.8118         | P    | <b>272.1717</b>  | 136.5895        | 255.1452       | 128.0762         | 2  |
| 13 |                  |                 |                |                  | R    | 175.1190         | 88.0631         | 158.0924       | 79.5498          | 1  |

Found in **F8WD00**, U3 small nucleolar RNA-associated protein 14 homolog A OS=Homo sapiens GN=UTP14A PE=2 SV=1

Match to Query 5650: 1297.766088 from(649.890320,2+) intensity(112340.5703)

Title: File314 Spectrum12142 scans: 14042

Data file \\192.168.1.104\public\raw data\Elite\_01\methylation\_ZW\k562\2013-5-23-K562-Kpropio-methyl-IP-Fr9-ZW.mgf

Click mouse within plot area to zoom in by factor of two about that point

Or, Plot from  to  Da Label all possible matches  Label matches used for scoring 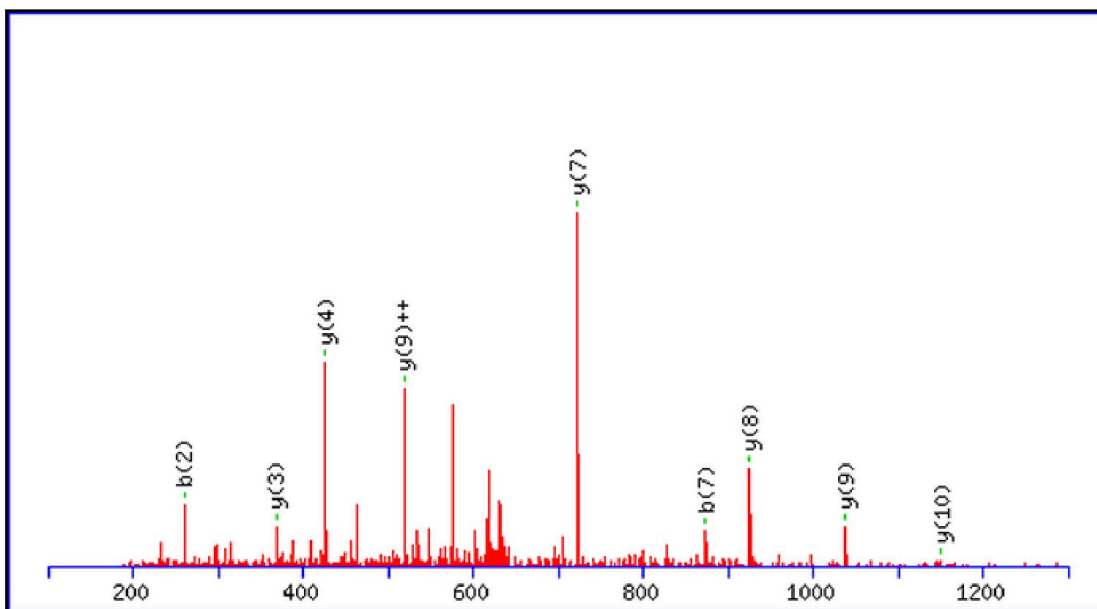

Monoisotopic mass of neutral peptide Mr(calc): 1297.7667

Fixed modifications: Carbamidomethyl (C) (ag)

Variable modifications:

K4 : Propionyl-(13CD3)Methyl (K)

Ions Score: 43 Expect: 0.018

Matches : 9/94 fragment ions using 12 most i

| #  | b               | b <sup>++</sup> | b <sup>*</sup> | b <sup>++</sup> | b <sup>0</sup> | b <sup>0++</sup> | Seq. | y                | y <sup>++</sup> | y <sup>*</sup> | y <sup>++</sup> | y <sup>0</sup> | y <sup>0++</sup> | #  |
|----|-----------------|-----------------|----------------|-----------------|----------------|------------------|------|------------------|-----------------|----------------|-----------------|----------------|------------------|----|
| 1  | 148.0757        | 74.5415         |                |                 |                |                  | F    |                  |                 |                |                 |                |                  | 11 |
| 2  | <b>261.1598</b> | 131.0835        |                |                 |                |                  | L    | <b>1151.7056</b> | 576.3564        | 1134.6790      | 567.8431        | 1133.6950      | 567.3511         | 10 |
| 3  | 374.2438        | 187.6255        |                |                 |                |                  | I    | <b>1038.6215</b> | <b>519.8144</b> | 1021.5949      | 511.3011        | 1020.6109      | 510.8091         | 9  |
| 4  | 576.4028        | 288.7051        | 559.3763       | 280.1918        |                |                  | K    | <b>925.5374</b>  | 463.2724        | 908.5109       | 454.7591        | 907.5269       | 454.2671         | 8  |
| 5  | 647.4399        | 324.2236        | 630.4134       | 315.7103        |                |                  | A    | <b>723.3784</b>  | 362.1928        | 706.3519       | 353.6796        | 705.3678       | 353.1876         | 7  |
| 6  | 744.4927        | 372.7500        | 727.4662       | 364.2367        |                |                  | P    | 652.3413         | 326.6743        | 635.3148       | 318.1610        | 634.3307       | 317.6690         | 6  |
| 7  | <b>873.5353</b> | 437.2713        | 856.5088       | 428.7580        | 855.5247       | 428.2660         | E    | 555.2885         | 278.1479        | 538.2620       | 269.6346        | 537.2780       | 269.1426         | 5  |
| 8  | 930.5568        | 465.7820        | 913.5302       | 457.2687        | 912.5462       | 456.7767         | G    | <b>426.2459</b>  | 213.6266        | 409.2194       | 205.1133        |                |                  | 4  |
| 9  | 1027.6095       | 514.3084        | 1010.5830      | 505.7951        | 1009.5990      | 505.3031         | P    | <b>369.2245</b>  | 185.1159        | 352.1979       | 176.6026        |                |                  | 3  |
| 10 | 1124.6623       | 562.8348        | 1107.6357      | 554.3215        | 1106.6517      | 553.8295         | P    | 272.1717         | 136.5895        | 255.1452       | 128.0762        |                |                  | 2  |
| 11 |                 |                 |                |                 |                |                  | R    | 175.1190         | 88.0631         | 158.0924       | 79.5498         |                |                  | 1  |



MS/MS Fragmentation of **KLAAKAYMPLR**Found in **F5H8K3**, PHD finger protein 19 OS=Homo sapiens GN=PHF19 PE=2 SV=1

Match to Query 6707: 1394.850188 from(698.432370, 2+) intensity(214282.7969)

Title: File314 Spectrum14179 scans: 16215

Data file \\192.168.1.104\public\raw data\Elite\_01\methylation\_ZW\k562\2013-5-23-K562-Kpropio-methyl-IP-Fr9-ZW.mgf

Click mouse within plot area to zoom in by factor of two about that point

Or,   to  Da Label all possible matches  Label matches used for scoring 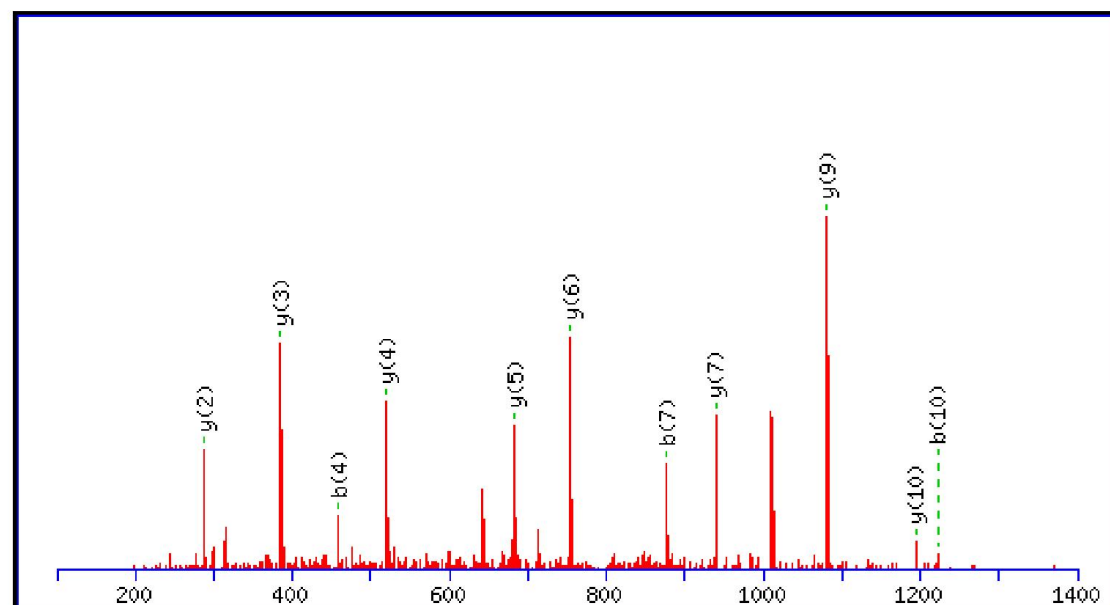**Monoisotopic mass of neutral peptide Mr(calc):** 1394.8501**Fixed modifications:** Carbamidomethyl (C) (apply to specified residues or t**Variable modifications:****K1** : Propionyl-(13CD3)Methyl (K)**K5** : Propionyl (K)**M8** : Label:13C(1)2H(3) (M)**Ions Score:** 78 **Expect:** 2.9e-006**Matches** : 11/80 fragment ions using 12 most intense peaks ([help](#))

| #  | b                | b <sup>++</sup> | b*        | b <sup>+++</sup> | Seq.     | y                | y <sup>++</sup> | y*        | y <sup>+++</sup> | #         |
|----|------------------|-----------------|-----------|------------------|----------|------------------|-----------------|-----------|------------------|-----------|
| 1  | 203.1663         | 102.5868        | 186.1397  | 93.5735          | <b>K</b> |                  |                 |           |                  | <b>11</b> |
| 2  | 316.2504         | 158.6288        | 299.2238  | 150.1155         | <b>L</b> | <b>1193.6984</b> | 597.3528        | 1176.6718 | 588.8395         | <b>10</b> |
| 3  | 387.2875         | 194.1474        | 370.2609  | 185.6341         | <b>A</b> | <b>1080.6143</b> | 540.8108        | 1063.5877 | 532.2975         | <b>9</b>  |
| 4  | <b>458.3246</b>  | 229.6659        | 441.2980  | 221.1527         | <b>A</b> | 1009.5772        | 505.2922        | 992.5506  | 496.7790         | <b>8</b>  |
| 5  | 642.4458         | 321.7265        | 625.4192  | 313.2132         | <b>K</b> | <b>938.5401</b>  | 469.7737        | 921.5135  | 461.2604         | <b>7</b>  |
| 6  | 713.4829         | 357.2451        | 696.4563  | 348.7318         | <b>A</b> | <b>754.4189</b>  | 377.7131        | 737.3923  | 369.1998         | <b>6</b>  |
| 7  | <b>876.5462</b>  | 438.7767        | 859.5197  | 430.2635         | <b>Y</b> | <b>683.3818</b>  | 342.1945        | 666.3552  | 333.6813         | <b>5</b>  |
| 8  | 1011.6083        | 506.3081        | 994.5823  | 497.7948         | <b>H</b> | <b>520.3184</b>  | 260.6629        | 503.2919  | 252.1496         | <b>4</b>  |
| 9  | 1108.6616        | 554.8345        | 1091.6351 | 546.3212         | <b>P</b> | <b>385.2558</b>  | 193.1315        | 368.2292  | 184.6183         | <b>3</b>  |
| 10 | <b>1221.7457</b> | 611.3765        | 1204.7192 | 602.8632         | <b>L</b> | <b>288.2030</b>  | 144.6051        | 271.1765  | 136.0919         | <b>2</b>  |
| 11 |                  |                 |           |                  | <b>R</b> | 175.1190         | 88.0631         | 158.0924  | 79.5498          | <b>1</b>  |

Found in **Q96BK5**, PIN2/TERF1-interacting telomerase inhibitor 1 OS=Homo sapiens GN=PINX1 PE=1 SV=2

Match to Query 12905: 1740.004988 from(871.009770,2+) intensity(133428.2969)

Title: File312 Spectrum8804 scans: 10358

Data file \\192.168.1.104\public\raw data\Elite\_01\methylation\_ZW\k562\2013-5-23-K562-Kpropio-methyl-IP-Fr8-ZW.mgf

Click mouse within plot area to zoom in by factor of two about that point

Or,  Plot from  to  Da Label all possible matches  Label matches used for scoring 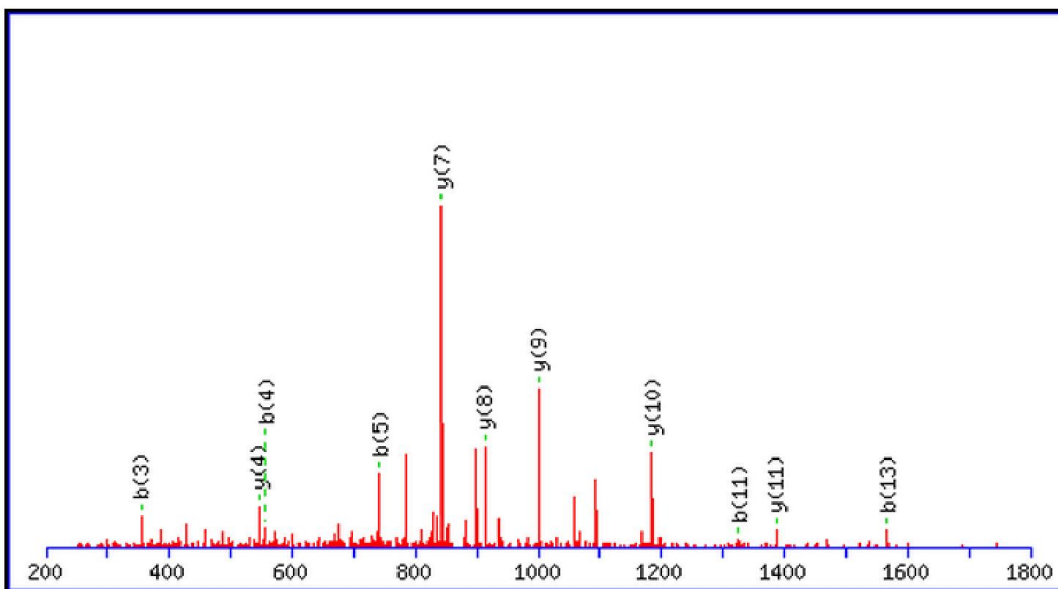

Monoisotopic mass of neutral peptide Mr(calc): 1740.004988

Fixed modifications: Carbamidomethyl (C) (apply to s

Variable modifications:

K3 : Propionyl (K)

K4 : Propionyl-(13CD3)Methyl (K)

K5 : Propionyl (K)

Ions Score: 47 Expect: 0.0074

Matches : 11/136 fragment ions using 15 most intense

| #  | b                | b <sup>++</sup> | b <sup>*</sup> | b <sup>*++</sup> | b <sup>0</sup> | b <sup>0++</sup> | Seq. | y                | y <sup>++</sup> | y <sup>*</sup> | y <sup>*++</sup> | y <sup>0</sup> | y <sup>0++</sup> | #  |
|----|------------------|-----------------|----------------|------------------|----------------|------------------|------|------------------|-----------------|----------------|------------------|----------------|------------------|----|
| 1  | 100.0757         | 50.5415         |                |                  |                |                  | V    |                  |                 |                |                  |                |                  | 14 |
| 2  | 171.1128         | 86.0600         |                |                  |                |                  | A    | 1641.9443        | 821.4758        | 1624.9177      | 812.9625         | 1623.9337      | 812.4705         | 13 |
| 3  | <b>355.2340</b>  | 178.1206        | 338.2074       | 169.6074         |                |                  | K    | 1570.9072        | 785.9572        | 1553.8806      | 777.4439         | 1552.8966      | 776.9519         | 12 |
| 4  | <b>557.3930</b>  | 279.2001        | 540.3664       | 270.6869         |                |                  | K    | <b>1386.7860</b> | 693.8966        | 1369.7594      | 685.3834         | 1368.7754      | 684.8914         | 11 |
| 5  | <b>741.5142</b>  | 371.2607        | 724.4876       | 362.7475         |                |                  | K    | <b>1184.6270</b> | 592.8171        | 1167.6004      | 584.3039         | 1166.6164      | 583.8118         | 10 |
| 6  | 828.5462         | 414.7767        | 811.5197       | 406.2635         | 810.5356       | 405.7715         | S    | <b>1000.5058</b> | 500.7565        | 983.4793       | 492.2433         | 982.4952       | 491.7513         | 9  |
| 7  | 899.5833         | 450.2953        | 882.5568       | 441.7820         | 881.5727       | 441.2900         | A    | <b>913.4738</b>  | 457.2405        | 896.4472       | 448.7272         | 895.4632       | 448.2352         | 8  |
| 8  | 996.6361         | 498.8217        | 979.6095       | 490.3084         | 978.6255       | 489.8164         | P    | <b>842.4367</b>  | 421.7220        | 825.4101       | 413.2087         | 824.4261       | 412.7167         | 7  |
| 9  | 1067.6732        | 534.3402        | 1050.6466      | 525.8270         | 1049.6626      | 525.3350         | A    | 745.3839         | 373.1956        | 728.3573       | 364.6823         | 727.3733       | 364.1903         | 6  |
| 10 | 1196.7158        | 598.8615        | 1179.6892      | 590.3483         | 1178.7052      | 589.8562         | E    | 674.3468         | 337.6770        | 657.3202       | 329.1638         | 656.3362       | 328.6717         | 5  |
| 11 | <b>1325.7584</b> | 663.3828        | 1308.7318      | 654.8696         | 1307.7478      | 654.3775         | E    | <b>545.3042</b>  | 273.1557        | 528.2776       | 264.6425         | 527.2936       | 264.1504         | 4  |
| 12 | 1453.8170        | 727.4121        | 1436.7904      | 718.8988         | 1435.8064      | 718.4068         | Q    | 416.2616         | 208.6344        | 399.2350       | 200.1212         |                |                  | 3  |
| 13 | <b>1566.9010</b> | 783.9541        | 1549.8745      | 775.4409         | 1548.8905      | 774.9489         | L    | 288.2030         | 144.6051        | 271.1765       | 136.0919         |                |                  | 2  |
| 14 |                  |                 |                |                  |                |                  | R    | 175.1190         | 88.0631         | 158.0924       | 79.5498          |                |                  | 1  |

MS/MS Fragmentation of **AIELIKSGGR**Found in **E7EW10**, Membrane-associated guanylate kinase, WW and PDZ domain-containing protein 2 OS=Homo sapiens GN=MAGI2 PE=2 SV=1

Match to Query 3916: 1116.677588 from(559.346070,2+) intensity(27267.5508)

Title: File312 Spectrum7082 scans: 8520

Data file \\192.168.1.104\public\raw\_data\Elite\_01\methylation\_ZW\k562\2013-5-23-K562-Kpropio-methyl-IP-Fr8-ZW.mgf

Click mouse within plot area to zoom in by factor of two about that point

Or,  150 to  Da Label all possible matches  Label matches used for scoring 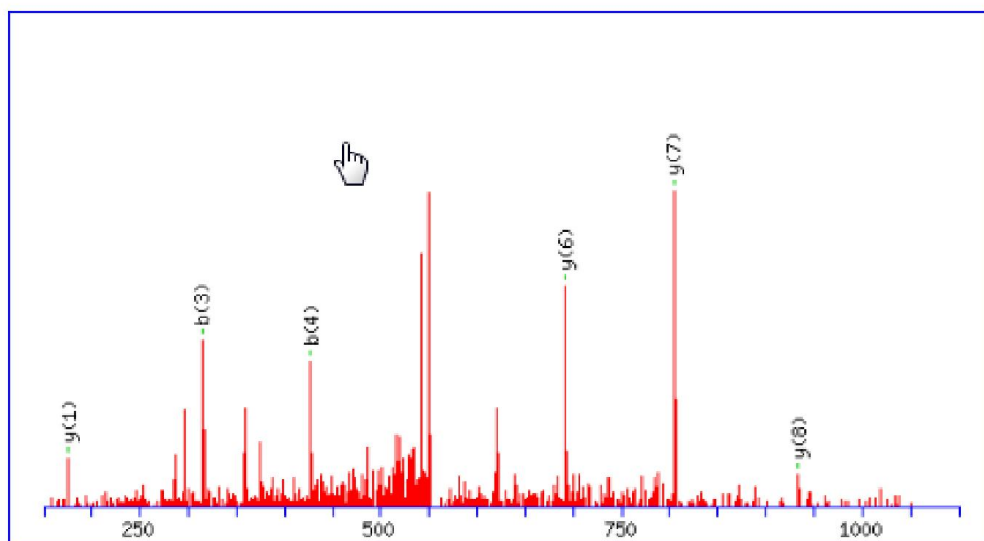

Monoisotopic mass of neutral peptide Mr(calc): 1116.6775

Fixed modifications: Carbamidomethyl (C) (apply to specified residues or termini only)

Variable modifications:

K6 : Propionyl-(13CD3)Methyl (K)

Ions Score: 27 Expect: 0.52

Matches : 6/88 fragment ions using 9 most intense peaks ([help](#))

| #  | b        | b <sup>++</sup> | b <sup>+</sup> | b <sup>+++</sup> | b <sup>0</sup> | b <sup>0++</sup> | Seq. | y         | y <sup>++</sup> | y <sup>+</sup> | y <sup>+++</sup> | y <sup>0</sup> | y <sup>0++</sup> | #  |
|----|----------|-----------------|----------------|------------------|----------------|------------------|------|-----------|-----------------|----------------|------------------|----------------|------------------|----|
| 1  | 72.0444  | 36.5258         |                |                  |                |                  | A    |           |                 |                |                  |                |                  | 10 |
| 2  | 185.1285 | 93.0679         |                |                  |                |                  | I    | 1046.6477 | 523.8275        | 1029.6212      | 515.3142         | 1028.6371      | 514.8222         | 9  |
| 3  | 314.1710 | 157.5892        |                |                  | 296.1605       | 148.5839         | E    | 933.5636  | 467.2855        | 916.5371       | 458.7722         | 915.5531       | 458.2802         | 8  |
| 4  | 427.2551 | 214.1312        |                |                  | 409.2445       | 205.1259         | L    | 804.5210  | 402.7642        | 787.4945       | 394.2509         | 786.5105       | 393.7589         | 7  |
| 5  | 540.3392 | 270.6732        |                |                  | 522.3286       | 261.6679         | I    | 691.4370  | 346.2221        | 674.4104       | 337.7089         | 673.4264       | 337.2168         | 6  |
| 6  | 742.4982 | 371.7527        | 725.4716       | 363.2395         | 724.4876       | 362.7474         | K    | 578.3529  | 289.6801        | 561.3264       | 281.1668         | 560.3424       | 280.6748         | 5  |
| 7  | 829.5302 | 415.2687        | 812.5037       | 406.7555         | 811.5197       | 406.2635         | S    | 376.1939  | 188.6006        | 359.1674       | 180.0873         | 358.1833       | 179.5953         | 4  |
| 8  | 886.5517 | 443.7795        | 869.5251       | 435.2662         | 868.5411       | 434.7742         | G    | 289.1619  | 145.0846        | 272.1353       | 136.5713         |                |                  | 3  |
| 9  | 943.5731 | 472.2902        | 926.5466       | 463.7769         | 925.5626       | 463.2849         | G    | 232.1404  | 116.5738        | 215.1139       | 108.0606         |                |                  | 2  |
| 10 |          |                 |                |                  |                |                  | R    | 175.1190  | 88.0631         | 158.0924       | 79.5498          |                |                  | 1  |

Match to Query 10491: 1594.988862 from(532.670230,3+) intensity(29796.8184)

Title: File312 Spectrum6632 scans: 8040

Data file \\192.168.1.104\public\raw data\Elite\_01\methylation\_ZW\k562\2013-5-23-K562-Kpropio-methyl-IP-Fr8-ZW.mgf

Click mouse within plot area to zoom in by factor of two about that point

Or,  to  Da

Label all possible matches  Label matches used for scoring

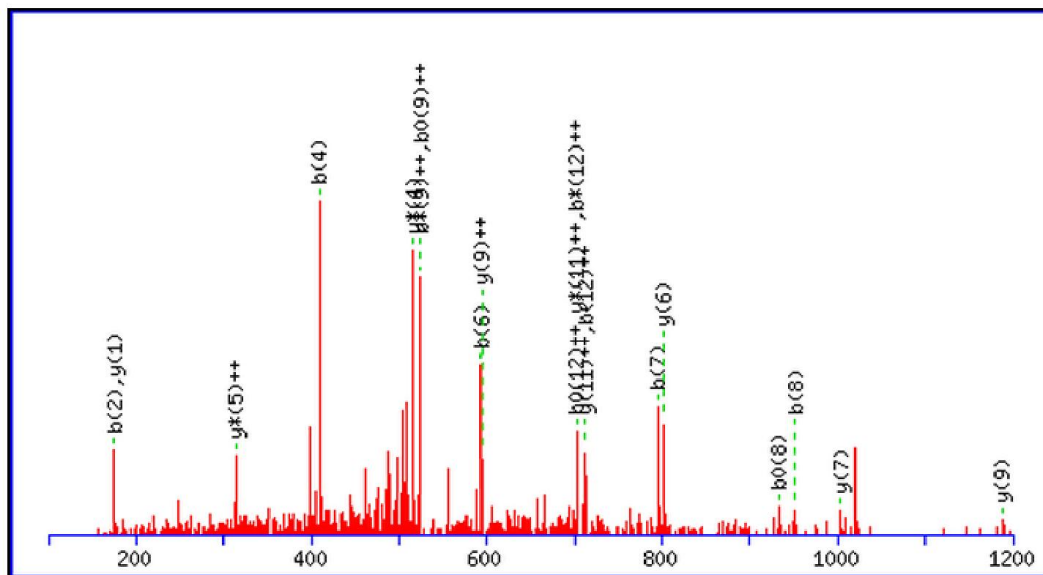

Monoisotopic mass of neutral peptide Mr(calc): 1594.9774

Fixed modifications: Carbamidomethyl (C) (apply to S)

Variable modifications:

M3 : Label:13C(1)2H(3) (M)

K7 : Propionyl-(13CD3)Methyl (K)

Ions Score: 27 Expect: 0.22

Matches : 20/110 fragment ions using 22 most intense

| #  | b               | b <sup>++</sup> | b <sup>*</sup> | b <sup>+++</sup> | b <sup>0</sup>  | b <sup>0++</sup> | Seq. | y                | y <sup>++</sup> | y <sup>*</sup>  | y <sup>+++</sup> | y <sup>0</sup> | y <sup>0++</sup> | #  |
|----|-----------------|-----------------|----------------|------------------|-----------------|------------------|------|------------------|-----------------|-----------------|------------------|----------------|------------------|----|
| 1  | 88.0393         | 44.5233         |                |                  | 70.0287         | 35.5180          | S    |                  |                 |                 |                  |                |                  | 13 |
| 2  | <b>175.0713</b> | 88.0393         |                |                  | 157.0608        | 79.0340          | S    | 1508.9527        | 754.9800        | 1491.9261       | 746.4667         | 1490.9421      | 745.9747         | 12 |
| 3  | 310.1340        | 155.5706        |                |                  | 292.1234        | 146.5654         | M    | 1421.9206        | <b>711.4640</b> | 1404.8941       | <b>702.9507</b>  |                |                  | 11 |
| 4  | <b>409.2024</b> | 205.1048        |                |                  | 391.1919        | 196.0996         | V    | 1286.8580        | 643.9326        | 1269.8314       | 635.4194         |                |                  | 10 |
| 5  | 480.2395        | 240.6234        |                |                  | 462.2290        | 231.6181         | A    | <b>1187.7896</b> | <b>594.3984</b> | 1170.7630       | 585.8851         |                |                  | 9  |
| 6  | <b>593.3236</b> | 297.1654        |                |                  | 575.3130        | 288.1602         | L    | 1116.7524        | 558.8799        | 1099.7259       | 550.3666         |                |                  | 8  |
| 7  | <b>795.4826</b> | 398.2449        | 778.4561       | 389.7317         | 777.4720        | 389.2397         | K    | <b>1003.6684</b> | 502.3378        | 986.6418        | 493.8246         |                |                  | 7  |
| 8  | <b>951.5837</b> | 476.2955        | 934.5572       | 467.7822         | <b>933.5732</b> | 467.2902         | R    | <b>801.5094</b>  | 401.2583        | 784.4828        | 392.7450         |                |                  | 6  |
| 9  | 1064.6678       | 532.8375        | 1047.6412      | <b>524.3243</b>  | 1046.6572       | <b>523.8322</b>  | L    | 645.4083         | 323.2078        | 628.3817        | <b>314.6945</b>  |                |                  | 5  |
| 10 | 1161.7205       | 581.3639        | 1144.6940      | 572.8506         | 1143.7100       | 572.3586         | P    | 532.3242         | 266.6657        | <b>515.2976</b> | 258.1525         |                |                  | 4  |
| 11 | 1308.7890       | 654.8981        | 1291.7624      | 646.3848         | 1290.7784       | 645.8928         | F    | 435.2714         | 218.1394        | 418.2449        | 209.6261         |                |                  | 3  |
| 12 | 1421.8730       | <b>711.4402</b> | 1404.8465      | <b>702.9269</b>  | 1403.8625       | <b>702.4349</b>  | L    | 288.2030         | 144.6051        | 271.1765        | 136.0919         |                |                  | 2  |
| 13 |                 |                 |                |                  |                 |                  | R    | <b>175.1190</b>  | 88.0631         | 158.0924        | 79.5498          |                |                  | 1  |

Found in **F2Z3C0**, 40S ribosomal protein S9 OS=Homo sapiens GN=RPS9 PE=2 SV=1

Match to Query 1869: 938.553448 from(470.284000,2+) intensity(16680.0313)

Title: File312 Spectrum4895 scans: 6186

Data file \\192.168.1.104\public\raw data\Elite\_01\methylation\_ZW\k562\2013-5-23-K562-Kpropio-methyl-IP-Fr8-ZW.mgf

Click mouse within plot area to zoom in by factor of two about that point

Or,   to  Da Label all possible matches  Label matches used for scoring 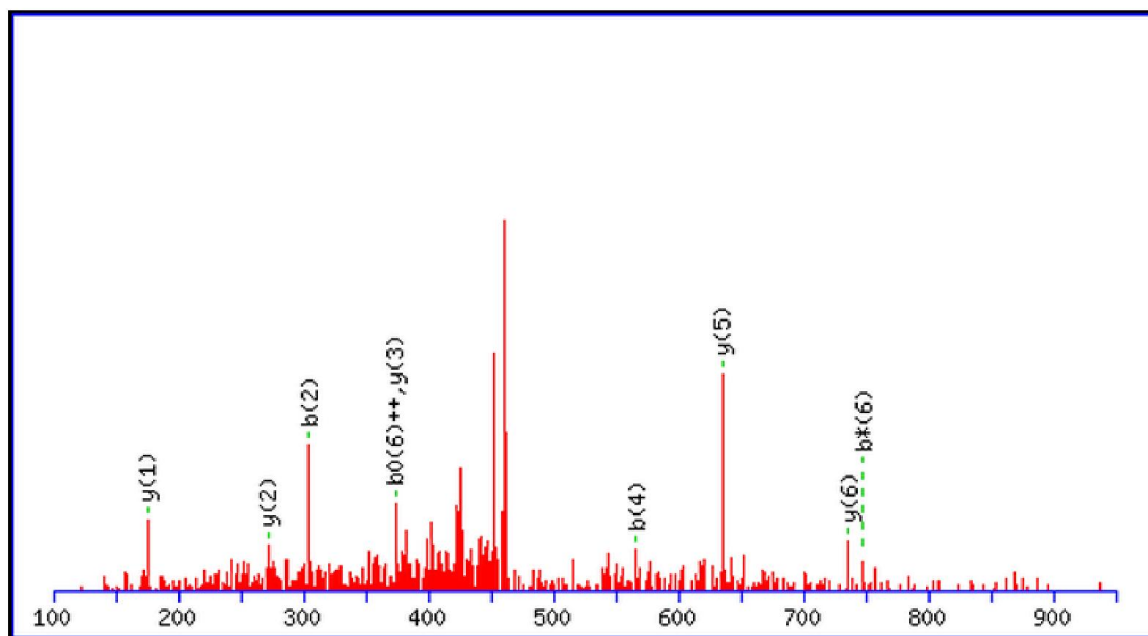Monoisotopic mass of neutral peptide  $M_r(\text{calc})$ : 937.5506

Fixed modifications: Carbamidomethyl

Variable modifications:

K1 : Propionyl-(13CD3)Methyl

Ions Score: 31 Expect: 0.18

Matches : 9/66 fragment ions

| # | b               | b <sup>++</sup> | b <sup>*</sup>  | b <sup>***</sup> | b <sup>0</sup> | b <sup>0++</sup> | Seq. | y               | y <sup>++</sup> | y <sup>*</sup> | y <sup>***</sup> | y <sup>0</sup> | y <sup>0++</sup> | # |
|---|-----------------|-----------------|-----------------|------------------|----------------|------------------|------|-----------------|-----------------|----------------|------------------|----------------|------------------|---|
| 1 | 203.1663        | 102.0868        | 186.1397        | 93.5735          |                |                  | K    |                 |                 |                |                  |                |                  | 7 |
| 2 | <b>304.2140</b> | 152.6106        | 287.1874        | 144.0973         | 286.2034       | 143.6053         | T    | <b>736.3988</b> | 368.7030        | 719.3723       | 360.1898         | 718.3883       | 359.6978         | 6 |
| 3 | 467.2773        | 234.1423        | 450.2507        | 225.6290         | 449.2667       | 225.1370         | Y    | <b>635.3511</b> | 318.1792        | 618.3246       | 309.6659         | 617.3406       | 309.1739         | 5 |
| 4 | <b>566.3457</b> | 283.6765        | 549.3192        | 275.1632         | 548.3351       | 274.6712         | V    | 472.2878        | 236.6475        | 455.2613       | 228.1343         | 454.2772       | 227.6423         | 4 |
| 5 | 667.3934        | 334.2003        | 650.3668        | 325.6871         | 649.3828       | 325.1951         | T    | <b>373.2194</b> | 187.1133        | 356.1928       | 178.6001         | 355.2088       | 178.1081         | 3 |
| 6 | 764.4462        | 382.7267        | <b>747.4196</b> | 374.2134         | 746.4356       | <b>373.7214</b>  | P    | <b>272.1717</b> | 136.5895        | 255.1452       | 128.0762         |                |                  | 2 |
| 7 |                 |                 |                 |                  |                |                  | R    | <b>175.1190</b> | 88.0631         | 158.0924       | 79.5498          |                |                  | 1 |

MS/MS Fragmentation of **IKETINNQEKLAQLQAVR**Found in **D6RDG3**, Transcription factor BTF3 (Fragment) OS=Homo sapiens GN=BTF3 PE=2 SV=1

Match to Query 18897: 2508.413668 from(1255.214110, 2+) intensity(430861.0313)

Title: File312 Spectrum19338 scans: 21701

Data file \\192.168.1.104\public\raw data\Elite\_01\methylation\_ZW\k562\2013-5-23-K562-Kpropio-methyl-IP-Fr8-ZW.mgf

Click mouse within plot area to zoom in by factor of two about that point

Or,   to  Da Label all possible matches  Label matches used for scoring 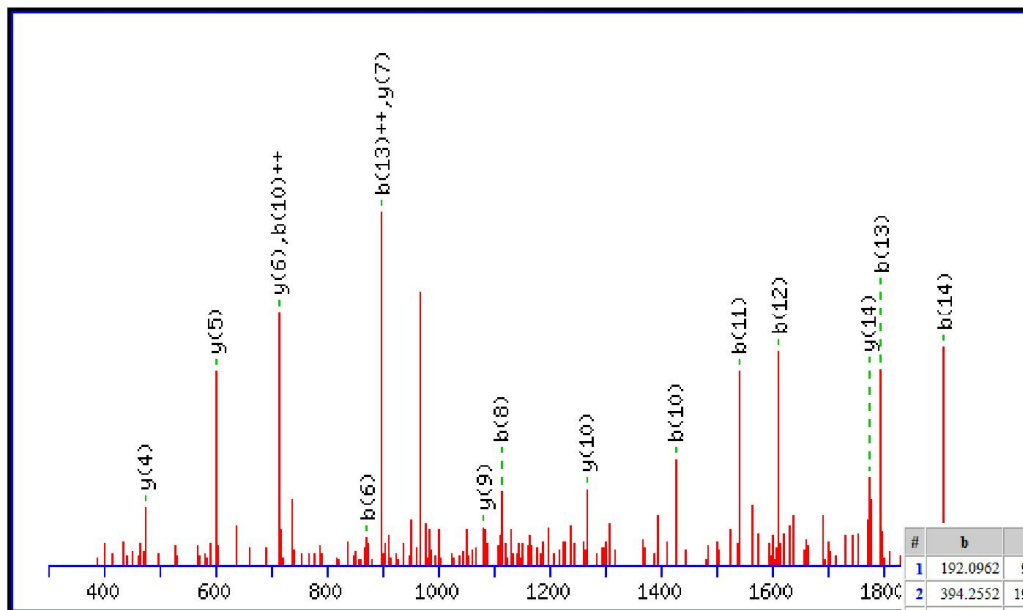**Monoisotopic mass of neutral peptide Mr(calc):** 2508.4109**Fixed modifications:** Carbamidomethyl (C) (apply to specified resid**Variable modifications:****M-term** : Propionyl (protein N-term) (Protein N-term)**M1** : Label:13C(1)2H(3) (M)**K2** : Propionyl-(13CD3)Methyl (K)**M6** : Label:13C(1)2H(3) (M)**K10** : Propionyl (K)**K13** : Propionyl (K)**Ions Score:** 68 **Expect:** 5.8e-005**Matches** : 16/190 fragment ions using 16 most intense peaks ([help](#))

| #  | b                | b <sup>++</sup> | b <sup>+</sup> | b <sup>+++</sup> | b <sup>0</sup> | b <sup>0++</sup> | Seq. | y                | y <sup>++</sup> | y <sup>+</sup> | y <sup>+++</sup> | y <sup>0</sup> | y <sup>0++</sup> | #  |
|----|------------------|-----------------|----------------|------------------|----------------|------------------|------|------------------|-----------------|----------------|------------------|----------------|------------------|----|
| 1  | 192.0962         | 96.5517         |                |                  |                |                  | M    |                  |                 |                |                  |                |                  | 19 |
| 2  | 394.2552         | 197.6312        | 377.2286       | 189.1180         |                |                  | K    | 2318.3294        | 1159.6683       | 2301.3028      | 1151.1550        | 2300.3188      | 1150.6630        | 18 |
| 3  | 523.2978         | 262.1525        | 506.2712       | 253.6392         | 505.2872       | 253.1472         | E    | 2116.1703        | 1058.5888       | 2099.1438      | 1050.0755        | 2098.1598      | 1049.5835        | 17 |
| 4  | 624.3454         | 312.6764        | 607.3189       | 304.1631         | 606.3349       | 303.6711         | T    | 1987.1277        | 994.0675        | 1970.1012      | 985.5542         | 1969.1172      | 985.0622         | 16 |
| 5  | 737.4295         | 369.2184        | 720.4030       | 360.7051         | 719.4189       | 360.2131         | I    | 1886.0801        | 943.5437        | 1869.0535      | 935.0304         | 1868.0695      | 934.5384         | 15 |
| 6  | <b>872.4922</b>  | 436.7497        | 855.4656       | 428.2365         | 854.4816       | 427.7444         | M    | <b>1772.9960</b> | 887.0016        | 1755.9695      | 878.4884         | 1754.9854      | 877.9964         | 14 |
| 7  | 986.5351         | 493.7712        | 969.5086       | 485.2579         | 968.5245       | 484.7659         | N    | 1637.9333        | 819.4703        | 1620.9068      | 810.9570         | 1619.9228      | 810.4650         | 13 |
| 8  | <b>1114.5937</b> | 557.8005        | 1097.5671      | 549.2872         | 1096.5831      | 548.7952         | Q    | 1523.8904        | 762.4488        | 1506.8639      | 753.9356         | 1505.8798      | 753.4436         | 12 |
| 9  | 1243.6363        | 621.8181        | 1226.6097      | 613.8085         | 1225.6257      | 613.3165         | E    | 1395.8318        | 698.4196        | 1378.8053      | 689.9063         | 1377.8213      | 689.4143         | 11 |
| 10 | <b>1427.7575</b> | <b>714.3824</b> | 1410.7309      | 705.8691         | 1409.7469      | 705.3771         | K    | <b>1266.7892</b> | 633.8983        | 1249.7627      | 625.3850         |                |                  | 10 |
| 11 | <b>1540.8415</b> | 770.9244        | 1523.8150      | 762.4111         | 1522.8310      | 761.9191         | L    | <b>1082.6681</b> | 541.8377        | 1065.6415      | 533.3244         |                |                  | 9  |
| 12 | <b>1611.8786</b> | 806.4430        | 1594.8521      | 797.9297         | 1593.8681      | 797.4377         | A    | 969.5840         | 485.2956        | 952.5574       | 476.7824         |                |                  | 8  |
| 13 | <b>1795.9998</b> | <b>898.5035</b> | 1778.9733      | 889.9903         | 1777.9892      | 889.4983         | K    | <b>898.5469</b>  | 449.7771        | 881.5203       | 441.2638         |                |                  | 7  |
| 14 | <b>1909.0839</b> | 955.0456        | 1892.0573      | 946.5323         | 1891.0733      | 946.0403         | L    | <b>714.4257</b>  | 357.7165        | 697.3992       | 349.2032         |                |                  | 6  |
| 15 | 2037.1425        | 1019.0749       | 2020.1159      | 1010.5616        | 2019.1319      | 1010.0696        | Q    | <b>601.3416</b>  | 301.1745        | 584.3151       | 292.6612         |                |                  | 5  |
| 16 | 2108.1796        | 1054.5934       | 2091.1530      | 1046.0801        | 2090.1690      | 1045.5881        | A    | <b>473.2831</b>  | 237.1452        | 456.2565       | 228.6319         |                |                  | 4  |
| 17 | 2236.2381        | 1118.6227       | 2219.2116      | 1110.1094        | 2218.2276      | 1109.6174        | Q    | 402.2459         | 201.6266        | 385.2194       | 193.1133         |                |                  | 3  |
| 18 | 2335.3066        | 1168.1569       | 2318.2800      | 1159.6436        | 2317.2960      | 1159.1516        | V    | 274.1874         | 137.5973        | 257.1608       | 129.0840         |                |                  | 2  |
| 19 |                  |                 |                |                  |                |                  | R    | 175.1190         | 88.0631         | 158.0924       | 79.5498          |                |                  | 1  |

Found in **Q9UMN6**, Histone-lysine N-methyltransferase MLL4 OS=Homo sapiens GN=WBP7 PE=1 SV=1

Match to Query 4152: 1134.590742 from(379.204190,3+) intensity(7865.1655)

Title: File312 Spectrum512 scans: 1178

Data file \\192.168.1.104\public\raw data\Elite\_01\methylation\_ZW\k562\2013-5-23-K562-Kpropio-methyl-IP-Fr8-ZW.mgf

Click mouse within plot area to zoom in by factor of two about that point

Or, Plot from  to  Da Label all possible matches  Label matches used for scoring 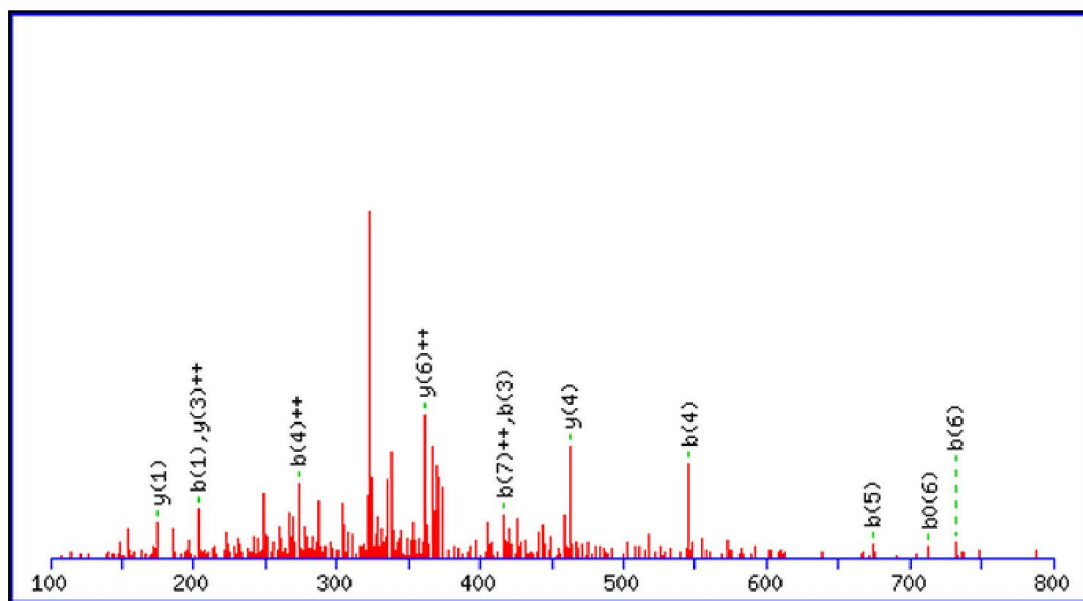

Monoisotopic mass of neutral peptide Mr(calc): 1134.5902

Fixed modifications: Carbamidomethyl (C) (apply to specified residues or termini only)

Variable modifications:

K1 : Propionyl-(13CD3)Methyl (K)

Ions Score: 32 Expect: 0.19

Matches : 12/88 fragment ions using 14 mo:

| # | b               | b <sup>++</sup> | b <sup>*</sup> | b <sup>+++</sup> | b <sup>0</sup>  | b <sup>0++</sup> | Seq.     | y               | y <sup>++</sup> | y <sup>*</sup> | y <sup>+++</sup> | y <sup>0</sup> | y <sup>0++</sup> | # |
|---|-----------------|-----------------|----------------|------------------|-----------------|------------------|----------|-----------------|-----------------|----------------|------------------|----------------|------------------|---|
| 1 | <b>203.1663</b> | 102.0868        | 186.1397       | 93.5735          |                 |                  | <b>K</b> |                 |                 |                |                  |                |                  | 9 |
| 2 | 359.2674        | 180.1373        | 342.2409       | 171.6241         |                 |                  | <b>R</b> | 933.4384        | 467.2229        | 916.4119       | 458.7096         | 915.4279       | 458.2176         | 8 |
| 3 | <b>416.2889</b> | 208.6481        | 399.2623       | 200.1348         |                 |                  | <b>G</b> | 777.3373        | 389.1723        | 760.3108       | 380.6590         | 759.3268       | 380.1670         | 7 |
| 4 | <b>545.3315</b> | <b>273.1694</b> | 528.3049       | 264.6561         | 527.3209        | 264.1641         | <b>E</b> | 720.3159        | <b>360.6616</b> | 703.2893       | 352.1483         | 702.3053       | 351.6563         | 6 |
| 5 | <b>674.3741</b> | 337.6907        | 657.3475       | 329.1774         | 656.3635        | 328.6854         | <b>E</b> | 591.2733        | 296.1403        | 574.2467       | 287.6270         | 573.2627       | 287.1350         | 5 |
| 6 | <b>731.3955</b> | 366.2014        | 714.3690       | 357.6881         | <b>713.3849</b> | 357.1961         | <b>G</b> | <b>462.2307</b> | 231.6190        | 445.2041       | 223.1057         | 444.2201       | 222.6137         | 4 |
| 7 | 832.4432        | <b>416.7252</b> | 815.4166       | 408.2120         | 814.4326        | 407.7200         | <b>T</b> | 405.2092        | <b>203.1083</b> | 388.1827       | 194.5950         | 387.1987       | 194.1030         | 3 |
| 8 | 961.4858        | 481.2465        | 944.4592       | 472.7333         | 943.4752        | 472.2412         | <b>E</b> | 304.1615        | 152.5844        | 287.1350       | 144.0711         | 286.1510       | 143.5791         | 2 |
| 9 |                 |                 |                |                  |                 |                  | <b>R</b> | <b>175.1190</b> | 88.0631         | 158.0924       | 79.5498          |                |                  | 1 |

Found in **C9JQG7**, Chromodomain Y-like protein (Fragment) OS=Homo sapiens GN=CDYL PE=2 SV=1

Match to Query 1155: 866.476968 from(434.245760,2+) intensity(121829.0703)

Title: File312 Spectrum7538 scans: 9007

Data file \\192.168.1.104\public\raw data\Elite\_01\methylation\_ZW\k562\2013-5-23-K562-Kpropio-methyl-IP-Fr8-ZW.mgf

Click mouse within plot area to zoom in by factor of two about that point

Or, Plot from  to  Da Label all possible matches  Label matches used for scoring 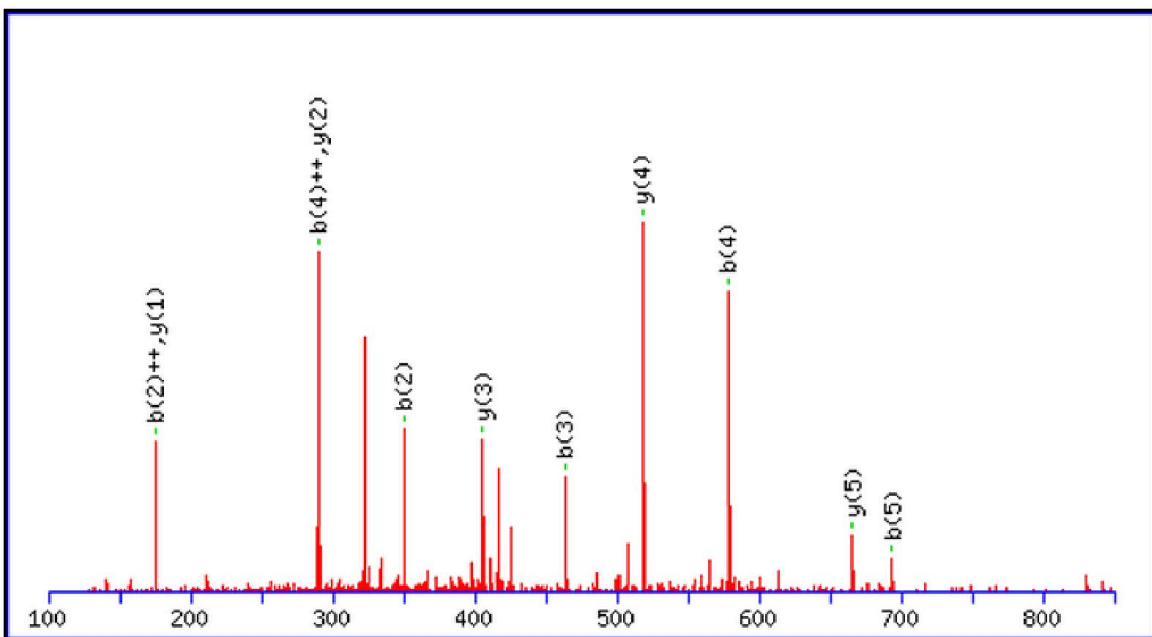Monoisotopic mass of neutral peptide  $M_r(\text{calc})$ : 866.4771

Fixed modifications:

Variable modification

K1 : Propionyl-

Ions Score: 33 Expe

Matches : 11/52 frag

| # | b               | b <sup>++</sup> | b <sup>*</sup> | b <sup>*++</sup> | b <sup>0</sup> | b <sup>0++</sup> | Seq. | y               | y <sup>++</sup> | y <sup>*</sup> | y <sup>*++</sup> | y <sup>0</sup> | y <sup>0++</sup> | # |
|---|-----------------|-----------------|----------------|------------------|----------------|------------------|------|-----------------|-----------------|----------------|------------------|----------------|------------------|---|
| 1 | 203.1663        | 102.0868        | 186.1397       | 93.5735          |                |                  | K    |                 |                 |                |                  |                |                  | 6 |
| 2 | <b>350.2347</b> | <b>175.6210</b> | 333.2082       | 167.1077         |                |                  | F    | <b>665.3253</b> | 333.1663        | 648.2988       | 324.6530         | 647.3148       | 324.1610         | 5 |
| 3 | <b>463.3188</b> | 232.1630        | 446.2922       | 223.6497         |                |                  | I    | <b>518.2569</b> | 259.6321        | 501.2304       | 251.1188         | 500.2463       | 250.6268         | 4 |
| 4 | <b>578.3457</b> | <b>289.6765</b> | 561.3192       | 281.1632         | 560.3351       | 280.6712         | D    | <b>405.1728</b> | 203.0901        | 388.1463       | 194.5768         | 387.1623       | 194.0848         | 3 |
| 5 | <b>693.3727</b> | 347.1900        | 676.3461       | 338.6767         | 675.3621       | 338.1847         | D    | <b>290.1459</b> | 145.5766        | 273.1193       | 137.0633         | 272.1353       | 136.5713         | 2 |
| 6 |                 |                 |                |                  |                |                  | R    | <b>175.1190</b> | 88.0631         | 158.0924       | 79.5498          |                |                  | 1 |



Found in **H0Y2S9**, Myosin phosphatase Rho-interacting protein (Fragment) OS=Homo sapiens GN=MPRIIP PE=4 SV=3

Match to Query 2132: 958.608608 from(480.311580,2+) intensity(2149818.2500)

Title: File312 Spectrum7671 scans: 9149

Data file \\192.168.1.104\public\raw data\Elite\_01\methylation\_ZW\k562\2013-5-23-K562-Kpropio-methyl-IP-Fr8-ZW.mgf

Click mouse within plot area to zoom in by factor of two about that point

Or,  to  Da Label all possible matches  Label matches used for scoring 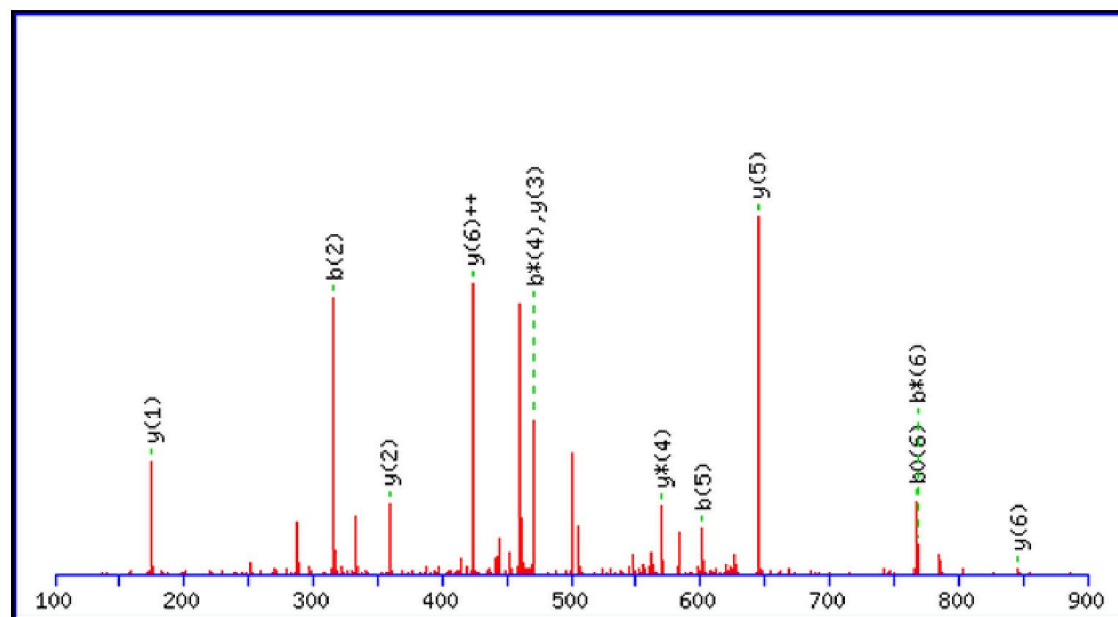

Monoisotopic mass of neutral peptide Mr(calc): 958.6084

Fixed modifications: Carbamidomethyl (C) (apply to specified residues or termini only)

Variable modifications:

K2 : Propionyl-(13CD3)Methyl

K6 : Propionyl (K)

Ions Score: 34 Expect: 0.057

Matches : 12/58 fragment ions us

|  | # | b               | b <sup>++</sup> | b <sup>*</sup>  | b <sup>*++</sup> | b <sup>0</sup>  | b <sup>0++</sup> | Seq. | y               | y <sup>++</sup> | y <sup>*</sup>  | y <sup>*++</sup> | y <sup>0</sup> | y <sup>0++</sup> | # |
|--|---|-----------------|-----------------|-----------------|------------------|-----------------|------------------|------|-----------------|-----------------|-----------------|------------------|----------------|------------------|---|
|  | 1 | 114.0913        | 57.5493         |                 |                  |                 |                  | L    |                 |                 |                 |                  |                |                  | 7 |
|  | 2 | <b>316.2504</b> | 158.6288        | 299.2238        | 150.1155         |                 |                  | K    | <b>846.5316</b> | <b>423.7694</b> | 829.5051        | 415.2562         | 828.5210       | 414.7642         | 6 |
|  | 3 | 373.2718        | 187.1395        | 356.2453        | 178.6263         |                 |                  | G    | <b>644.3726</b> | 322.6899        | 627.3461        | 314.1767         | 626.3620       | 313.6847         | 5 |
|  | 4 | 488.2988        | 244.6530        | <b>471.2722</b> | 236.1397         | 470.2882        | 235.6477         | D    | 587.3511        | 294.1792        | <b>570.3246</b> | 285.6659         | 569.3406       | 285.1739         | 4 |
|  | 5 | <b>601.3828</b> | 301.1951        | 584.3563        | 292.6818         | 583.3723        | 292.1898         | L    | <b>472.3242</b> | 236.6657        | 455.2976        | 228.1525         |                |                  | 3 |
|  | 6 | 785.5040        | 393.2556        | <b>768.4775</b> | 384.7424         | <b>767.4934</b> | 384.2504         | K    | <b>359.2401</b> | 180.1237        | 342.2136        | 171.6104         |                |                  | 2 |
|  | 7 |                 |                 |                 |                  |                 |                  | R    | <b>175.1190</b> | 88.0631         | 158.0924        | 79.5498          |                |                  | 1 |

Found in **P13639**, Elongation factor 2 OS=Homo sapiens GN=EEF2 PE=1 SV=4

Match to Query 4071: 1067.582748 from(534.798650,2+) intensity(227659.8750)

Title: File340 Spectrum4474 scans: 5397

Data file \\192.168.1.104\public\raw data\Elite\_01\methylation\_ZW\k562\2013-5-23-K562-Kpropio-methyl-IP-Fr7-ZW.mgf

Click mouse within plot area to zoom in by factor of two about that point

Or, Plot from  to  Da Label all possible matches  Label matches used for scoring 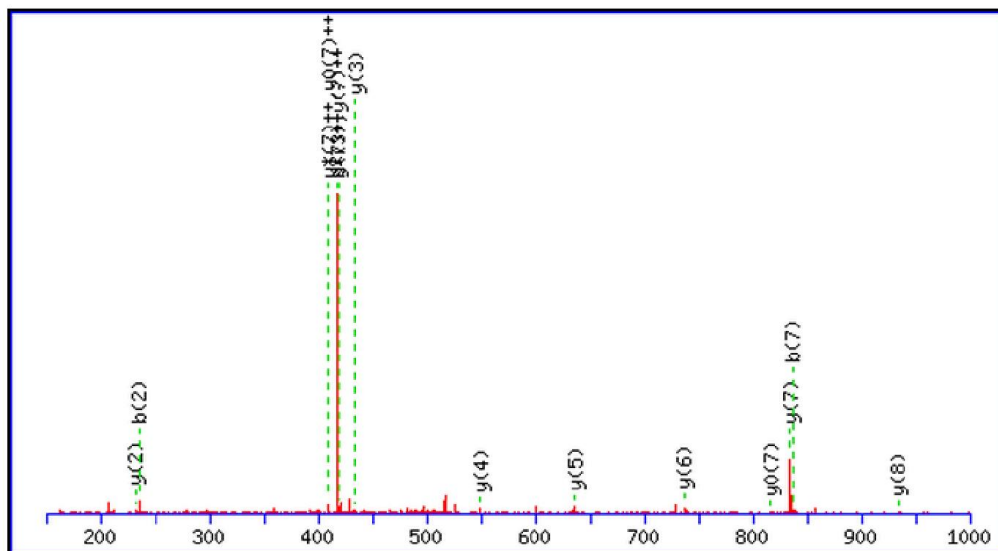

Monoisotopic mass of neutral peptide Mr(calc): 1067.5827

Fixed modifications: Carbamidomethyl (C) (apply to specified residues or termini only)

Variable modifications:

M1 : Label:13C(1)2H(3) (M)

K7 : Propionyl-(13CD3)Methyl (K)

Ions Score: 21 Expect: 2.6

Matches : 15/72 fragment ions using 58 most int

| # | b               | b <sup>++</sup> | b*       | b* <sup>++</sup> | b <sup>0</sup> | b <sup>0++</sup> | Seq. | y               | y <sup>++</sup> | y*              | y* <sup>++</sup> | y <sup>0</sup>  | y <sup>0++</sup> | # |
|---|-----------------|-----------------|----------|------------------|----------------|------------------|------|-----------------|-----------------|-----------------|------------------|-----------------|------------------|---|
| 1 | 136.0699        | 68.5386         |          |                  |                |                  | M    |                 |                 |                 |                  |                 |                  | 9 |
| 2 | <b>235.1384</b> | 118.0728        |          |                  |                |                  | V    | <b>933.5273</b> | 467.2673        | 916.5007        | 458.7540         | 915.5167        | 458.2620         | 8 |
| 3 | 332.1911        | 166.5992        |          |                  |                |                  | P    | <b>834.4588</b> | <b>417.7331</b> | 817.4323        | <b>409.2198</b>  | <b>816.4483</b> | <b>408.7278</b>  | 7 |
| 4 | 433.2388        | 217.1230        |          |                  | 415.2282       | 208.1178         | T    | <b>737.4061</b> | 369.2067        | 720.3795        | 360.6934         | 719.3955        | 360.2014         | 6 |
| 5 | 520.2708        | 260.6391        |          |                  | 502.2603       | 251.6338         | S    | <b>636.3584</b> | 318.6828        | 619.3319        | 310.1696         | 618.3478        | 309.6776         | 5 |
| 6 | 635.2978        | 318.1525        |          |                  | 617.2872       | 309.1472         | D    | <b>549.3264</b> | 275.1668        | 532.2998        | 266.6535         | 531.3158        | 266.1615         | 4 |
| 7 | <b>837.4568</b> | <b>419.2320</b> | 820.4302 | 410.7188         | 819.4462       | 410.2267         | K    | <b>434.2994</b> | 217.6534        | <b>417.2729</b> | 209.1401         |                 |                  | 3 |
| 8 | 894.4783        | 447.7428        | 877.4517 | 439.2295         | 876.4677       | 438.7375         | G    | <b>232.1404</b> | 116.5738        | 215.1139        | 108.0606         |                 |                  | 2 |
| 9 |                 |                 |          |                  |                |                  | R    | 175.1190        | 88.0631         | 158.0924        | 79.5498          |                 |                  | 1 |

Found in **Q6R954**, Polymerase delta interacting protein 46 OS=Homo sapiens GN=PDIP46 PE=2 SV=1

Match to Query 8879: 1439.836288 from(720.925420,2+) intensity(24912.3145)

Title: File340 Spectrum6426 scans: 7483

Data file \\192.168.1.104\public\raw data\Elite\_01\methylation\_ZW\k562\2013-5-23-K562-Kpropio-methyl-

Click mouse within plot area to zoom in by factor of two about that point

Or,  to  Da Label all possible matches  Label matches used for scoring 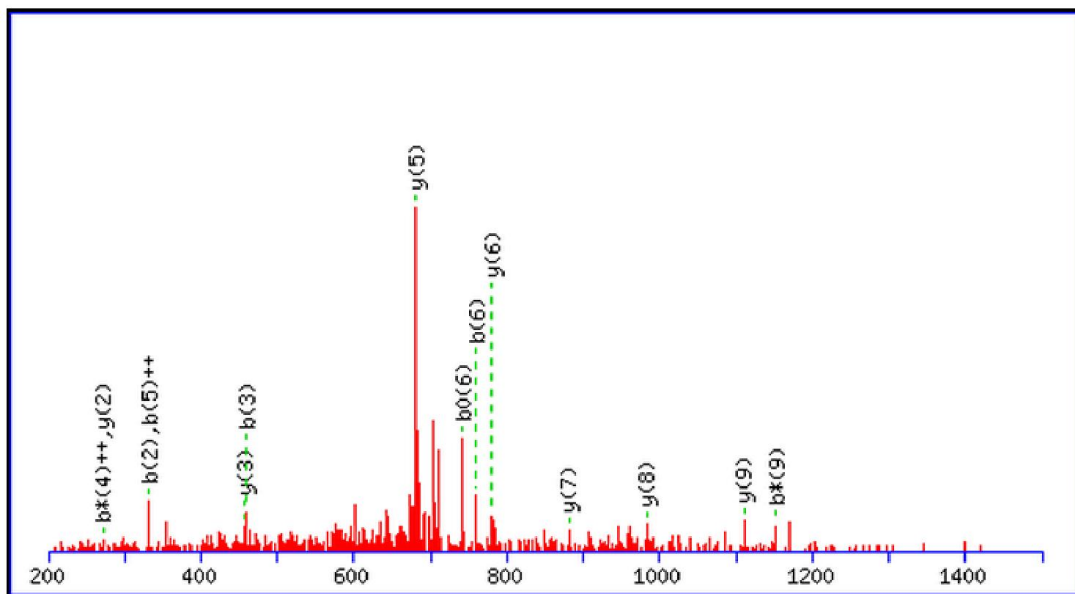

Monoisotopic mass of neutral peptide Mr(calc): 1439.8369

Fixed modifications: Carbamidomethyl (C) (a)

Variable modifications:

K1 : Propionyl-(13CD3)Methyl (K)

K9 : Propionyl (K)

Ions Score: 23 Expect: 1.9

Matches : 14/102 fragment ions using 47 mo

| #  | b               | b <sup>++</sup> | b*               | b <sup>+++</sup> | b <sup>0</sup>  | b <sup>0++</sup> | Seq. | y                | y <sup>++</sup> | y*        | y <sup>+++</sup> | y <sup>0</sup> | y <sup>0++</sup> | #  |
|----|-----------------|-----------------|------------------|------------------|-----------------|------------------|------|------------------|-----------------|-----------|------------------|----------------|------------------|----|
| 1  | 203.1663        | 102.0868        | 186.1397         | 93.5735          |                 |                  | K    |                  |                 |           |                  |                |                  | 11 |
| 2  | <b>331.2249</b> | 166.1161        | 314.1983         | 157.6028         |                 |                  | Q    | 1238.6852        | 619.8462        | 1221.6586 | 611.3329         | 1220.6746      | 610.8409         | 10 |
| 3  | <b>459.2834</b> | 230.1454        | 442.2569         | 221.6321         |                 |                  | Q    | <b>1110.6266</b> | 555.8169        | 1093.6000 | 547.3037         | 1092.6160      | 546.8116         | 9  |
| 4  | 560.3311        | 280.6692        | 543.3046         | <b>272.1559</b>  | 542.3206        | 271.6639         | T    | <b>982.5680</b>  | 491.7876        | 965.5415  | 483.2744         | 964.5574       | 482.7824         | 8  |
| 5  | 661.3788        | <b>331.1930</b> | 644.3523         | 322.6798         | 643.3682        | 322.1878         | T    | <b>881.5203</b>  | 441.2638        | 864.4938  | 432.7505         | 863.5098       | 432.2585         | 7  |
| 6  | <b>760.4472</b> | 380.7272        | 743.4207         | 372.2140         | <b>742.4367</b> | 371.7220         | V    | <b>780.4727</b>  | 390.7400        | 763.4461  | 382.2267         |                |                  | 6  |
| 7  | 857.5000        | 429.2536        | 840.4734         | 420.7404         | 839.4894        | 420.2483         | P    | <b>681.4042</b>  | 341.2058        | 664.3777  | 332.6925         |                |                  | 5  |
| 8  | 985.5586        | 493.2829        | 968.5320         | 484.7696         | 967.5480        | 484.2776         | Q    | 584.3515         | 292.6794        | 567.3249  | 284.1661         |                |                  | 4  |
| 9  | 1169.6797       | 585.3435        | <b>1152.6532</b> | 576.8302         | 1151.6692       | 576.3382         | K    | <b>456.2929</b>  | 228.6501        | 439.2663  | 220.1368         |                |                  | 3  |
| 10 | 1266.7325       | 633.8699        | 1249.7060        | 625.3566         | 1248.7219       | 624.8646         | P    | <b>272.1717</b>  | 136.5895        | 255.1452  | 128.0762         |                |                  | 2  |
| 11 |                 |                 |                  |                  |                 |                  | R    | 175.1190         | 88.0631         | 158.0924  | 79.5498          |                |                  | 1  |

Match to Query 5445: 1183.657328 from(592.835940,2+) intensity(31017.3262)

Title: File340 Spectrum5712 scans: 6722

Data file \\192.168.1.104\public\raw data\Elite\_01\methylation\_ZWk562\2013-5-23-K562-Kpropio-methyl-IP-Fr7-ZW.mgf

Click mouse within plot area to zoom in by factor of two about that point

Or,   to  Da Label all possible matches  Label matches used for scoring 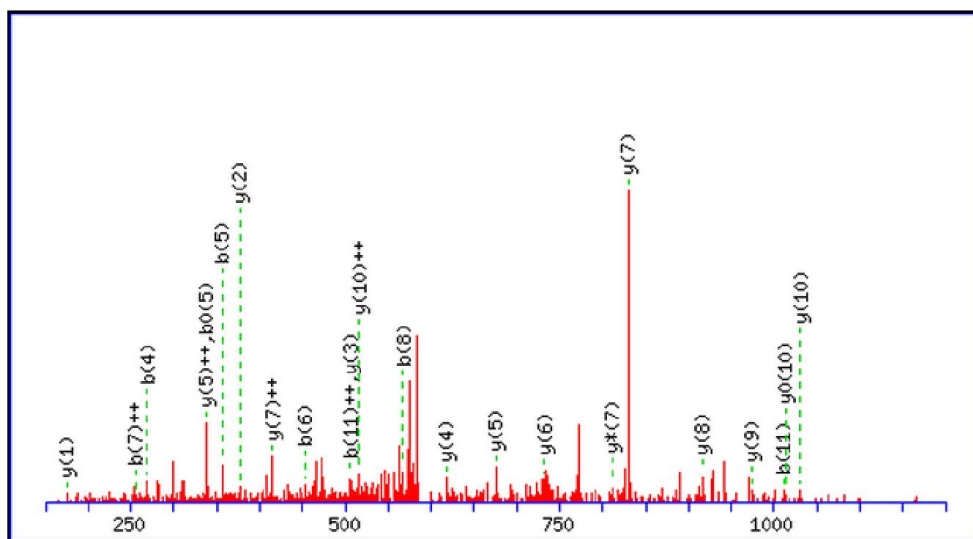

Monoisotopic mass of neutral peptide Mr(calc): 1183.6582

Fixed modifications: Carbamidomethyl (C) (apply to specified residues or termini only)

Variable modifications:

K11 : Propionyl-(13CD3)Methyl (K)

Ions Score: 33 Expect: 0.2

Matches : 23/92 fragment ions using 87 most in

| #  | b                | b <sup>++</sup> | b <sup>*</sup> | b <sup>+++</sup> | b <sup>0</sup>  | b <sup>0++</sup> | Seq. | y                | y <sup>++</sup> | y <sup>*</sup>  | y <sup>+++</sup> | y <sup>0</sup>   | y <sup>0++</sup> | #  |
|----|------------------|-----------------|----------------|------------------|-----------------|------------------|------|------------------|-----------------|-----------------|------------------|------------------|------------------|----|
| 1  | 58.0287          | 29.5180         |                |                  |                 |                  | G    |                  |                 |                 |                  |                  |                  | 12 |
| 2  | 155.0815         | 78.0444         |                |                  |                 |                  | P    | 1127.6440        | 564.3256        | 1110.6175       | 555.8124         | 1109.6335        | 555.3204         | 11 |
| 3  | 212.1030         | 106.5551        |                |                  |                 |                  | G    | <b>1030.5913</b> | <b>515.7993</b> | 1013.5647       | 507.2860         | <b>1012.5807</b> | 506.7940         | 10 |
| 4  | <b>269.1244</b>  | 135.0659        |                |                  |                 |                  | G    | <b>973.5698</b>  | 487.2885        | 956.5432        | 478.7753         | 955.5592         | 478.2833         | 9  |
| 5  | <b>356.1565</b>  | 178.5819        |                |                  | <b>338.1459</b> | 169.5766         | S    | <b>916.5483</b>  | 458.7778        | 899.5218        | 450.2645         | 898.5378         | 449.7725         | 8  |
| 6  | <b>453.2092</b>  | 227.1083        |                |                  | 435.1987        | 218.1030         | P    | <b>829.5163</b>  | <b>415.2618</b> | <b>812.4897</b> | 406.7485         |                  |                  | 7  |
| 7  | 510.2307         | <b>255.6190</b> |                |                  | 492.2201        | 246.6137         | G    | <b>732.4635</b>  | 366.7354        | 715.4370        | 358.2221         |                  |                  | 6  |
| 8  | <b>567.2522</b>  | 284.1297        |                |                  | 549.2416        | 275.1244         | G    | <b>675.4421</b>  | <b>338.2247</b> | 658.4155        | 329.7114         |                  |                  | 5  |
| 9  | 680.3362         | 340.6717        |                |                  | 662.3257        | 331.6665         | L    | <b>618.4206</b>  | 309.7139        | 601.3941        | 301.2007         |                  |                  | 4  |
| 10 | 808.3948         | 404.7010        | 791.3682       | 396.1878         | 790.3842        | 395.6958         | Q    | <b>505.3365</b>  | 253.1719        | 488.3100        | 244.6586         |                  |                  | 3  |
| 11 | <b>1010.5538</b> | <b>505.7805</b> | 993.5273       | 497.2673         | 992.5432        | 496.7753         | K    | <b>377.2780</b>  | 189.1426        | 360.2514        | 180.6293         |                  |                  | 2  |
| 12 |                  |                 |                |                  |                 |                  | R    | <b>175.1190</b>  | 88.0631         | 158.0924        | 79.5498          |                  |                  | 1  |

Found in **K7EJB8**, Protein phosphatase 1 regulatory subunit 14A OS=Homo sapiens GN=PPP1R14A PE=4 SV=1

Match to Query 2516: 953.545568 from(477.780060,2+) intensity(46758.8008)

Title: File340 Spectrum5861 scans: 6881

Data file \\192.168.1.104\public\raw data\Elite\_01\methylation\_ZW\k562\2013-5-23-K562-Kpropio-methyl-IP-Fr7-ZW.mgf

Click mouse within plot area to zoom in by factor of two about that point

Or, Plot from  to  Da Label all possible matches  Label matches used for scoring 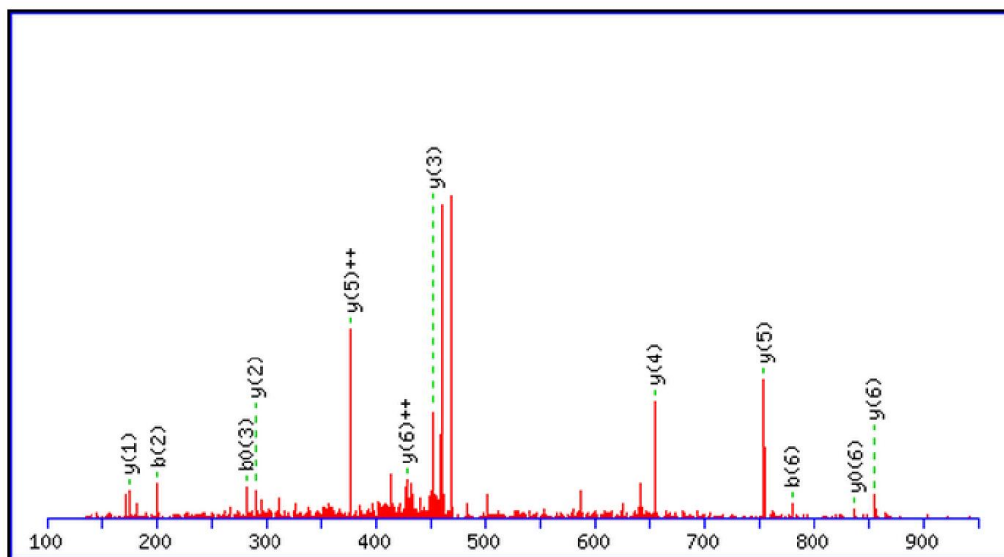

Monoisotopic mass of neutral peptide Mr(calc): 953.5455

Fixed modifications: Carbamidomethyl (C) (apply to specified residues or termini only)

Variable modifications:

K4 : Propionyl-(J3CN3)Methyl (K)

Ions Score: 39 Expec

Matches : 12/62 fragm

| # | b               | b <sup>++</sup> | b*       | b <sup>*++</sup> | b <sup>0</sup>  | b <sup>0++</sup> | Seq. | y               | y <sup>++</sup> | y*       | y <sup>*++</sup> | y <sup>0</sup>  | y <sup>0++</sup> | # |
|---|-----------------|-----------------|----------|------------------|-----------------|------------------|------|-----------------|-----------------|----------|------------------|-----------------|------------------|---|
| 1 | 100.0757        | 50.5415         |          |                  |                 |                  | V    |                 |                 |          |                  |                 |                  | 7 |
| 2 | <b>201.1234</b> | 101.0653        |          |                  | 183.1128        | 92.0600          | T    | <b>855.4843</b> | <b>428.2458</b> | 838.4578 | 419.7325         | <b>837.4738</b> | 419.2405         | 6 |
| 3 | 300.1918        | 150.5995        |          |                  | <b>282.1812</b> | 141.5942         | V    | <b>754.4367</b> | <b>377.7220</b> | 737.4101 | 369.2087         | 736.4261        | 368.7167         | 5 |
| 4 | 502.3508        | 251.6790        | 485.3242 | 243.1658         | 484.3402        | 242.6738         | K    | <b>655.3682</b> | 328.1878        | 638.3417 | 319.6745         | 637.3577        | 319.1825         | 4 |
| 5 | 665.4141        | 333.2107        | 648.3876 | 324.6974         | 647.4036        | 324.2054         | Y    | <b>453.2092</b> | 227.1082        | 436.1827 | 218.5950         | 435.1987        | 218.1030         | 3 |
| 6 | <b>780.4411</b> | 390.7242        | 763.4145 | 382.2109         | 762.4305        | 381.7189         | D    | <b>290.1459</b> | 145.5766        | 273.1193 | 137.0633         | 272.1353        | 136.5713         | 2 |
| 7 |                 |                 |          |                  |                 |                  | R    | <b>175.1190</b> | 88.0631         | 158.0924 | 79.5498          |                 |                  | 1 |

MS/MS Fragmentation of **LAKKTAEEPAASGR**

Found in **Q9NQS7**, Inner centromere protein OS=Homo sapiens GN=INCENP PE=1 SV=3

Match to Query 9030: 1557.863248 from(779.938900,2+) intensity(19372.4043)

Title: File309 Spectrum5796 scans: 7064

Data file \\192.168.1.104\public\raw data\Elite\_01\methylation\_ZW\k562\2013-5-23-K562-Kpropio-methyl-IP-Fr6-ZW.mgf

Click mouse within plot area to zoom in by factor of two about that point

Or,   to  Da

Label all possible matches  Label matches used for scoring

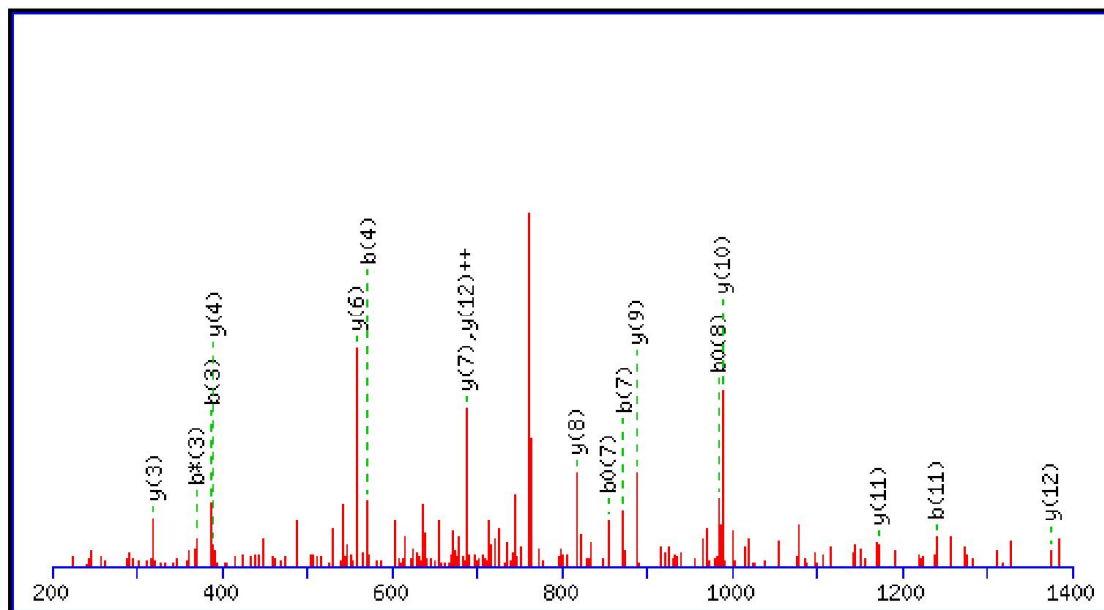

**Monoisotopic mass of neutral peptide Mr(calc): 1557.8635**

**Fixed modifications:** Carbamidomethyl (C) (apply to specified residues or

**Variable modifications:**

**K3** : Propionyl-(13CD3)Methyl (K)

**K4** : Propionyl (K)

**Ions Score: 51 Expect: 0.0039**

**Matches : 17/140 fragment ions using 36 most intense peaks** ([help](#))

| #  | b                | b <sup>++</sup> | b <sup>+</sup>  | b <sup>+++</sup> | b <sup>0</sup>  | b <sup>0++</sup> | Seq. | y                | y <sup>++</sup> | y <sup>+</sup> | y <sup>+++</sup> | y <sup>0</sup> | y <sup>0++</sup> | #  |
|----|------------------|-----------------|-----------------|------------------|-----------------|------------------|------|------------------|-----------------|----------------|------------------|----------------|------------------|----|
| 1  | 114.0913         | 57.5493         |                 |                  |                 |                  | L    |                  |                 |                |                  |                |                  | 14 |
| 2  | 185.1285         | 93.0679         |                 |                  |                 |                  | A    | 1445.7867        | 723.3970        | 1428.7602      | 714.8837         | 1427.7762      | 714.3917         | 13 |
| 3  | <b>387.2875</b>  | 194.1474        | <b>370.2609</b> | 185.6341         |                 |                  | K    | <b>1374.7496</b> | <b>687.8788</b> | 1357.7231      | 679.3652         | 1356.7390      | 678.8732         | 12 |
| 4  | <b>571.4086</b>  | 286.2080        | 554.3821        | 277.6947         |                 |                  | K    | <b>1172.5906</b> | 586.7989        | 1156.5640      | 578.2857         | 1154.5800      | 577.7937         | 11 |
| 5  | 672.4563         | 336.7318        | 655.4298        | 328.2185         | 654.4458        | 327.7265         | T    | <b>988.4694</b>  | 494.7383        | 971.4429       | 486.2251         | 970.4588       | 485.7331         | 10 |
| 6  | 743.4934         | 372.2504        | 726.4669        | 363.7371         | 725.4829        | 363.2451         | A    | <b>887.4217</b>  | 444.2145        | 870.3952       | 435.7012         | 869.4112       | 435.2092         | 9  |
| 7  | <b>872.5360</b>  | 436.7717        | 855.5095        | 428.2589         | <b>854.5255</b> | 427.7664         | E    | <b>816.3846</b>  | 408.6959        | 799.3581       | 400.1827         | 798.3741       | 399.6907         | 8  |
| 8  | 1001.5786        | 501.2930        | 984.5521        | 492.7797         | <b>983.5681</b> | 492.2877         | E    | <b>687.3420</b>  | 344.1747        | 670.3155       | 335.6614         | 669.3315       | 335.1694         | 7  |
| 9  | 1098.6314        | 549.8193        | 1081.6048       | 541.3061         | 1080.6208       | 540.8140         | P    | <b>558.2994</b>  | 279.6534        | 541.2729       | 271.1401         | 540.2839       | 270.6481         | 6  |
| 10 | 1169.6685        | 585.3379        | 1152.6420       | 576.8246         | 1151.6579       | 576.3326         | A    | 461.2467         | 231.1270        | 444.2201       | 222.6137         | 443.2361       | 222.1217         | 5  |
| 11 | <b>1240.7056</b> | 620.8564        | 1223.6791       | 612.3432         | 1222.6951       | 611.8512         | A    | <b>390.2095</b>  | 195.6084        | 373.1830       | 187.0951         | 372.1990       | 186.6031         | 4  |
| 12 | 1327.7376        | 664.3725        | 1310.7111       | 655.8592         | 1309.7271       | 655.3672         | S    | <b>319.1724</b>  | 160.0899        | 302.1459       | 151.5766         | 301.1619       | 151.0846         | 3  |
| 13 | 1384.7591        | 692.8832        | 1367.7326       | 684.3699         | 1366.7485       | 683.8779         | C    | 232.1494         | 116.5738        | 215.1139       | 108.0606         |                |                  | 2  |
| 14 |                  |                 |                 |                  |                 |                  | R    | 175.1190         | 88.0631         | 158.0924       | 79.5498          |                |                  | 1  |

Found in **Q5JZB7**, Spindlin-2B OS=Homo sapiens GN=SPIN2B PE=2 SV=1

Match to Query 11948: 1765.876448 from(883.945500, 2+) intensity(111218.6563)

Title: File309 Spectrum8373 scans: 9815

Data file \\192.168.1.104\public\raw data\Elite\_01\methylation\_ZW\k562\2013-5-23-K562-Kpropio-methyl-IP-Fr6-ZW.mgf

Click mouse within plot area to zoom in by factor of two about that point

Or,   to  Da Label all possible matches  Label matches used for scoring 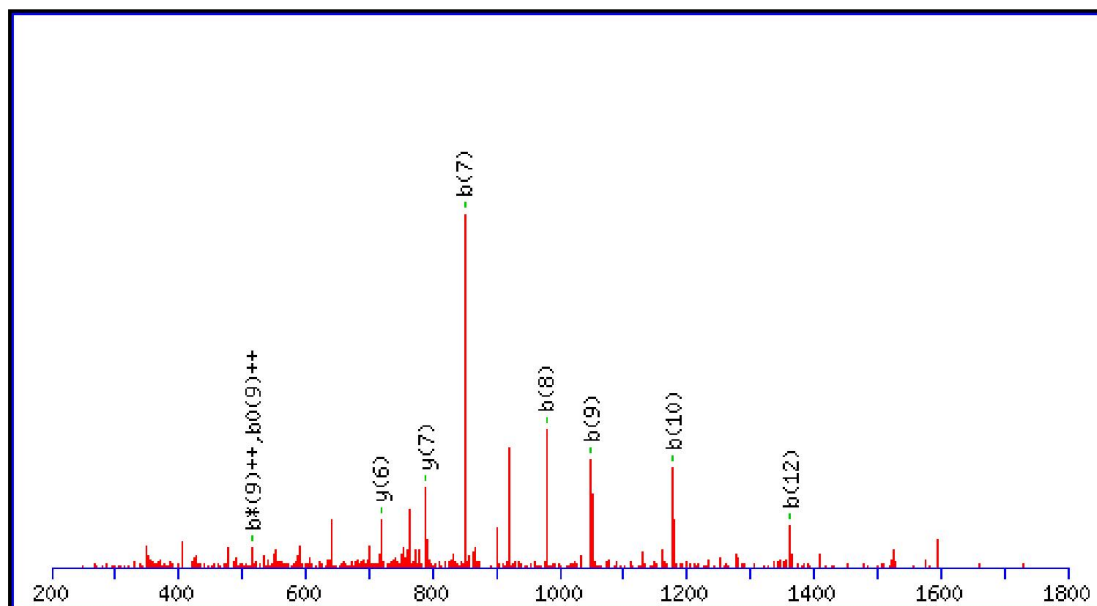

**Monoisotopic mass of neutral peptide Mr(calc):** 1765.8810  
**Fixed modifications:** Carbamidomethyl (C) (apply to specified r  
**Variable modifications:**  
**M1** : Label:13C(1)2H(3) (M)  
**K2** : Propionyl-(13CD3)Methyl (K)  
**Ions Score:** 23 **Expect:** 1.9  
**Matches :** 9/160 fragment ions using 15 most intense peaks [\(help\)](#)

| #  | b                | b <sup>++</sup> | b*        | b <sup>++</sup> | b <sup>0</sup> | b <sup>0++</sup> | Seq.     | y               | y <sup>++</sup> | y*        | y <sup>++</sup> | y <sup>0</sup> | y <sup>0++</sup> | #         |
|----|------------------|-----------------|-----------|-----------------|----------------|------------------|----------|-----------------|-----------------|-----------|-----------------|----------------|------------------|-----------|
| 1  | 136.0699         | 68.5386         |           |                 |                |                  | <b>M</b> |                 |                 |           |                 |                |                  | <b>15</b> |
| 2  | 338.2290         | 169.6181        | 321.2024  | 161.1048        |                |                  | <b>K</b> | 1631.8256       | 816.4165        | 1614.7991 | 807.9032        | 1613.8151      | 807.4112         | <b>14</b> |
| 3  | 439.2766         | 220.1420        | 422.2501  | 211.6287        | 421.2661       | 211.1367         | <b>T</b> | 1429.6666       | 715.3369        | 1412.6401 | 706.8237        | 1411.6560      | 706.3317         | <b>13</b> |
| 4  | 536.3294         | 268.6683        | 519.3029  | 260.1551        | 518.3188       | 259.6631         | <b>P</b> | 1328.6189       | 664.8131        | 1311.5924 | 656.2998        | 1310.6084      | 655.8078         | <b>12</b> |
| 5  | 650.3723         | 325.6898        | 633.3458  | 317.1765        | 632.3618       | 316.6845         | <b>N</b> | 1231.5662       | 616.2867        | 1214.5396 | 607.7734        | 1213.5556      | 607.2814         | <b>11</b> |
| 6  | 721.4094         | 361.2084        | 704.3829  | 352.6951        | 703.3989       | 352.2031         | <b>A</b> | 1117.5232       | 559.2653        | 1100.4967 | 550.7520        | 1099.5127      | 550.2600         | <b>10</b> |
| 7  | <b>849.4680</b>  | 425.2376        | 832.4415  | 416.7244        | 831.4575       | 416.2324         | <b>Q</b> | 1046.4861       | 523.7467        | 1029.4596 | 515.2334        | 1028.4756      | 514.7414         | <b>9</b>  |
| 8  | <b>978.5106</b>  | 489.7589        | 961.4841  | 481.2457        | 960.5000       | 480.7537         | <b>E</b> | 918.4276        | 459.7174        | 901.4010  | 451.2041        | 900.4170       | 450.7121         | <b>8</b>  |
| 9  | <b>1049.5477</b> | 525.2775        | 1032.5212 | <b>516.7642</b> | 1031.5372      | <b>516.2722</b>  | <b>A</b> | <b>789.3850</b> | 395.1961        | 772.3584  | 386.6828        | 771.3744       | 386.1908         | <b>7</b>  |
| 10 | <b>1178.5907</b> | 589.7988        | 1161.5638 | 581.2855        | 1160.5798      | 580.7935         | <b>E</b> | <b>718.3478</b> | 359.6776        | 701.3213  | 351.1643        | 700.3373       | 350.6723         | <b>6</b>  |
| 11 | 1235.6118        | 618.3095        | 1218.5852 | 609.7963        | 1217.6012      | 609.3042         | <b>G</b> | 589.3053        | 295.1563        | 572.2787  | 286.6430        | 571.2947       | 286.1510         | <b>5</b>  |
| 12 | <b>1363.6704</b> | 682.3388        | 1346.6438 | 673.8255        | 1345.6598      | 673.3335         | <b>Q</b> | 532.2838        | 266.6455        | 515.2572  | 258.1323        | 514.2732       | 257.6402         | <b>4</b>  |
| 13 | 1491.7289        | 746.3681        | 1474.7024 | 737.8548        | 1473.7184      | 737.3628         | <b>Q</b> | 404.2252        | 202.6162        | 387.1987  | 194.1030        | 386.2146       | 193.6110         | <b>3</b>  |
| 14 | 1592.7766        | 796.8919        | 1575.7501 | 788.3787        | 1574.7661      | 787.8867         | <b>T</b> | 276.1666        | 138.5870        | 259.1401  | 130.0737        | 258.1561       | 129.5817         | <b>2</b>  |
| 15 |                  |                 |           |                 |                |                  | <b>R</b> | 175.1190        | 88.0631         | 158.0924  | 79.5498         |                |                  | <b>1</b>  |

Found in **H0YHX9**, Nascent polypeptide-associated complex subunit alpha (Fragment) OS=Homo sapiens GN=NACA PE=2 SV=1

Match to Query 5366: 1136.712748 from(569.363650,2+) intensity(117938.2891)

Title: File320 Spectrum12847 scans: 14333

Data file \\192.168.1.104\public\raw data\Elite\_01\methylation\_ZWk562\2013-5-23-562-Kpropio-methyl-IP-Fr5-ZW.mgf

Click mouse within plot area to zoom in by factor of two about that point

Or, Plot from  to  Da Label all possible matches  Label matches used for scoring 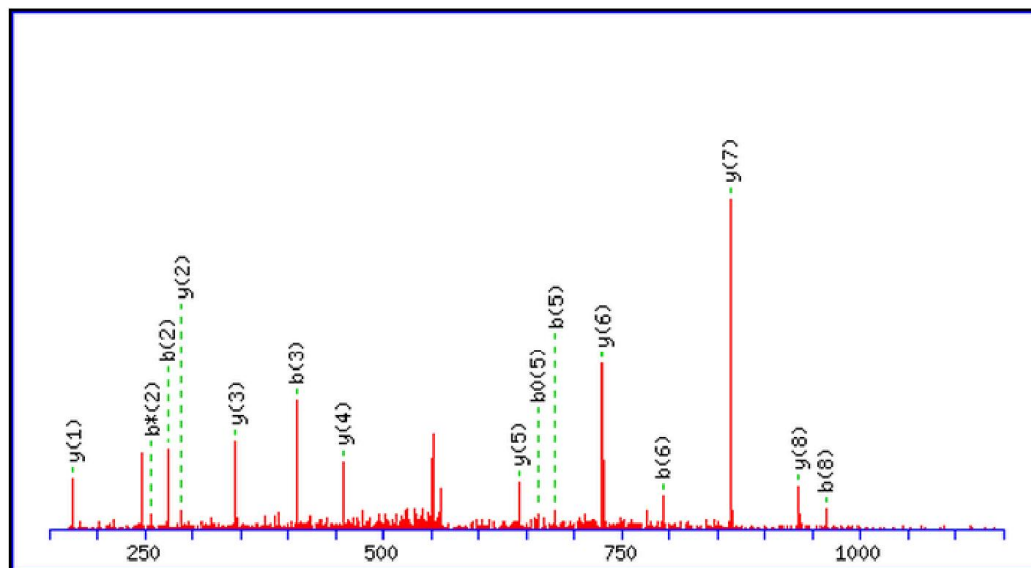Monoisotopic mass of neutral peptide  $M_r(\text{calc})$ : 1136.7127

Fixed modifications: Ca:

Variable modifications:

K1 : Propionyl-(13C)

M3 : Label:13C(1)2H

K5 : Propionyl (K)

Ions Score: 57 Expect:

Matches : 15/80 fragmen:

| # | b               | b <sup>++</sup> | b <sup>*</sup>  | b <sup>*++</sup> | b <sup>0</sup>  | b <sup>0++</sup> | Seq. | y               | y <sup>++</sup> | y <sup>*</sup> | y <sup>*++</sup> | y <sup>0</sup> | y <sup>0++</sup> | # |
|---|-----------------|-----------------|-----------------|------------------|-----------------|------------------|------|-----------------|-----------------|----------------|------------------|----------------|------------------|---|
| 1 | 203.1663        | 102.0868        | 186.1397        | 93.5735          |                 |                  | K    |                 |                 |                |                  |                |                  | 9 |
| 2 | <b>274.2034</b> | 137.6053        | <b>257.1769</b> | 129.0921         |                 |                  | A    | <b>935.5615</b> | 468.2844        | 918.5350       | 459.7711         | 917.5510       | 459.2791         | 8 |
| 3 | <b>409.2661</b> | 205.1367        | 392.2395        | 196.6234         |                 |                  | M    | <b>864.5244</b> | 432.7658        | 847.4979       | 424.2526         | 846.5139       | 423.7606         | 7 |
| 4 | 496.2981        | 248.6527        | 479.2716        | 240.1394         | 478.2875        | 239.6474         | S    | <b>729.4618</b> | 365.2345        | 712.4352       | 356.7212         | 711.4512       | 356.2292         | 6 |
| 5 | <b>680.4193</b> | 340.7133        | 663.3927        | 332.2000         | <b>662.4087</b> | 331.7080         | K    | <b>642.4297</b> | 321.7185        | 625.4032       | 313.2052         |                |                  | 5 |
| 6 | <b>793.5033</b> | 397.2553        | 776.4768        | 388.7420         | 775.4928        | 388.2500         | L    | <b>458.3085</b> | 229.6579        | 441.2820       | 221.1446         |                |                  | 4 |
| 7 | 850.5248        | 425.7660        | 833.4983        | 417.2528         | 832.5142        | 416.7608         | G    | <b>345.2245</b> | 173.1159        | 328.1979       | 164.6026         |                |                  | 3 |
| 8 | <b>963.6089</b> | 482.3081        | 946.5823        | 473.7948         | 945.5983        | 473.3028         | L    | <b>288.2030</b> | 144.6051        | 271.1765       | 136.0919         |                |                  | 2 |
| 9 |                 |                 |                 |                  |                 |                  | R    | <b>175.1190</b> | 88.0631         | 158.0924       | 79.5498          |                |                  | 1 |



Found in **I3L3Z8**, Pre-mRNA-processing-splicing factor 8 (Fragment) OS=Homo sapiens GN=PRPF8 PE=4 SV=1

Match to Query 6346: 1207.681608 from(604.848080,2+) intensity(116592.1484)

Title: File320 Spectrum12819 scans: 14303

Data file \\192.168.1.104\public\raw data\Elite\_01\methylation\_ZWk562\2013-5-23-562-Kpropio-methyl-IP-Fr5-ZW.mgf

Click mouse within plot area to zoom in by factor of two about that point

Or, Plot from  to  Da Label all possible matches  Label matches used for scoring 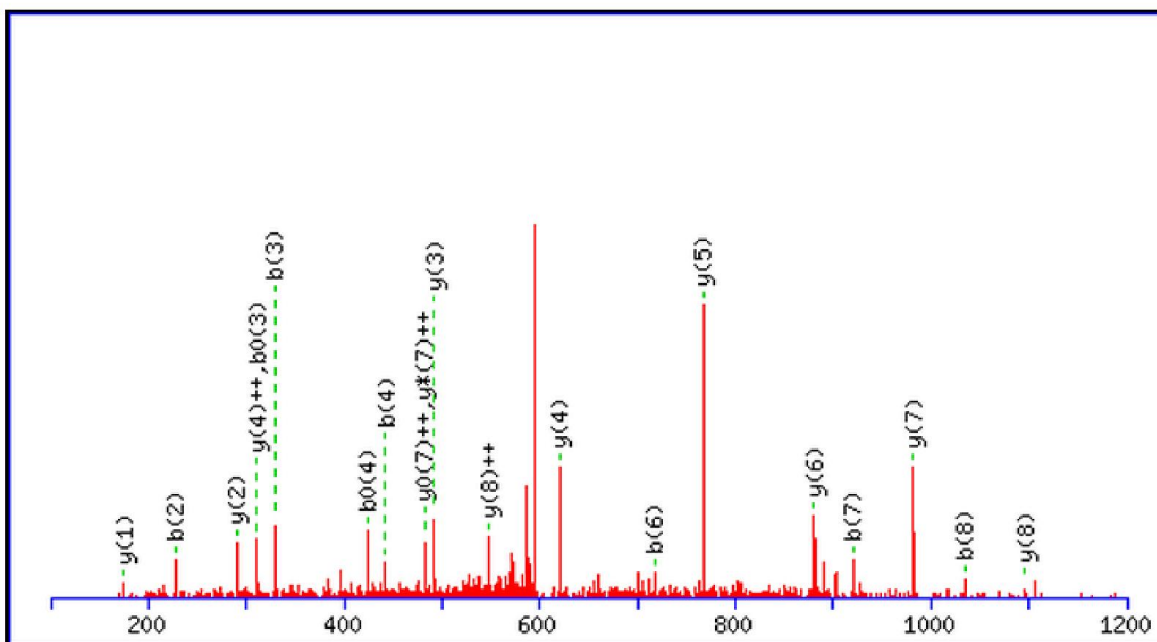

Monoisotopic mass of neutral peptide Mr (k)

Fixed modifications: Carbamidomethyl (C)

Variable modifications:

K7 : Propionyl-(13CD3)Methyl (K)

Ions Score: 58 Expect: 0.00062

Matches : 20/88 fragment ions using 32 m/z

| # | b                | b <sup>++</sup> | b <sup>*</sup> | b <sup>+++</sup> | b <sup>0</sup>  | b <sup>0++</sup> | Seq. | y                | y <sup>++</sup> | y <sup>*</sup> | y <sup>+++</sup> | y <sup>0</sup> | y <sup>0++</sup> | # |
|---|------------------|-----------------|----------------|------------------|-----------------|------------------|------|------------------|-----------------|----------------|------------------|----------------|------------------|---|
| 1 | 114.0913         | 57.5493         |                |                  |                 |                  | I    |                  |                 |                |                  |                |                  | 9 |
| 2 | <b>228.1343</b>  | 114.5708        | 211.1077       | 106.0575         |                 |                  | N    | <b>1095.6066</b> | <b>548.3069</b> | 1078.5800      | 539.7936         | 1077.5960      | 539.3016         | 8 |
| 3 | <b>329.1819</b>  | 165.0946        | 312.1554       | 156.5813         | <b>311.1714</b> | 156.0893         | T    | <b>981.5636</b>  | 491.2855        | 964.5371       | <b>482.7722</b>  | 963.5531       | <b>482.2802</b>  | 7 |
| 4 | <b>442.2660</b>  | 221.6366        | 425.2395       | 213.1234         | <b>424.2554</b> | 212.6314         | L    | <b>880.5160</b>  | 440.7616        | 863.4894       | 432.2483         | 862.5054       | 431.7563         | 6 |
| 5 | 589.3344         | 295.1709        | 572.3079       | 286.6576         | 571.3239        | 286.1656         | F    | <b>767.4319</b>  | 384.2196        | 750.4054       | 375.7063         | 749.4213       | 375.2143         | 5 |
| 6 | <b>717.3930</b>  | 359.2001        | 700.3665       | 350.6869         | 699.3824        | 350.1949         | Q    | <b>620.3635</b>  | <b>310.6854</b> | 603.3369       | 302.1721         | 602.3529       | 301.6801         | 4 |
| 7 | <b>919.5520</b>  | 460.2796        | 902.5255       | 451.7664         | 901.5414        | 451.2744         | K    | <b>492.3049</b>  | 246.6561        | 475.2784       | 238.1428         | 474.2943       | 237.6508         | 3 |
| 8 | <b>1034.5790</b> | 517.7931        | 1017.5524      | 509.2798         | 1016.5684       | 508.7878         | D    | <b>290.1459</b>  | 145.5766        | 273.1193       | 137.0633         | 272.1353       | 136.5713         | 2 |
| 9 |                  |                 |                |                  |                 |                  | R    | <b>175.1190</b>  | 88.0631         | 158.0924       | 79.5498          |                |                  | 1 |

Match to Query 5640: 1158.688948 from(580.351750,2+) intensity(56163.8398)

Title: File320 Spectrum9130 scans: 10367

Data file \\192.168.1.104\public\raw data\Elite\_01\methylation\_ZW\k562\2013-5-23-562-Kpropio-methyl-IP-Fr5-ZW.mgf

Click mouse within plot area to zoom in by factor of two about that point

Or,  150 to 1200 Da

Label all possible matches  Label matches used for scoring

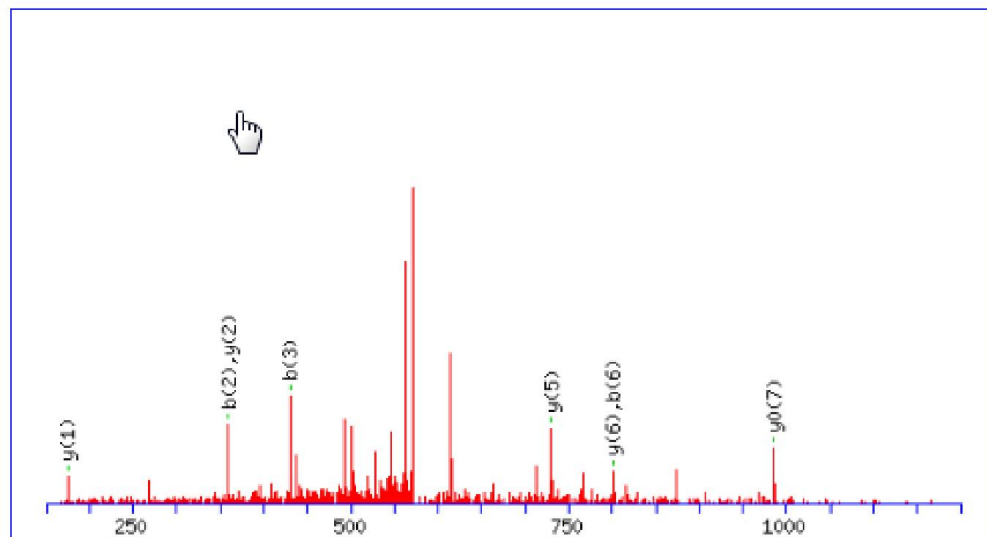

Monoisotopic mass of neutral peptide Mr(calc): 1158.6993

Fixed modifications: Carbamidomethyl (C) (apply to specified residues or termini only)

Variable modifications:

K2 : Propionyl-(13CD3)Methyl (K)

K7 : Propionyl (K)

Ions Score: 31 Expect: 0.23

Matches : 9/72 fragment ions using 10 most intense peaks

| # | b               | b <sup>++</sup> | b <sup>*</sup> | b <sup>+++</sup> | b <sup>0</sup> | b <sup>0++</sup> | Seq. | y               | y <sup>++</sup> | y <sup>*</sup> | y <sup>+++</sup> | y <sup>0</sup>  | y <sup>0++</sup> | # |
|---|-----------------|-----------------|----------------|------------------|----------------|------------------|------|-----------------|-----------------|----------------|------------------|-----------------|------------------|---|
| 1 | 157.1084        | 79.0578         | 140.0818       | 70.5446          |                |                  | R    |                 |                 |                |                  |                 |                  | 8 |
| 2 | <b>359.2674</b> | 180.1373        | 342.2409       | 171.6241         |                |                  | K    | 1003.6055       | 502.3064        | 986.5790       | 493.7931         | <b>985.5949</b> | 493.3011         | 7 |
| 3 | <b>430.3045</b> | 215.6559        | 413.2780       | 207.1426         |                |                  | A    | <b>801.4465</b> | 401.2269        | 784.4199       | 392.7136         | 783.4359        | 392.2216         | 6 |
| 4 | 543.3886        | 272.1979        | 526.3620       | 263.6847         |                |                  | L    | <b>730.4094</b> | 365.7083        | 713.3828       | 357.1951         | 712.3988        | 356.7030         | 5 |
| 5 | 672.4312        | 336.7192        | 655.4046       | 328.2059         | 654.4206       | 327.7139         | E    | 617.3253        | 309.1663        | 600.2988       | 300.6530         | 599.3148        | 300.1610         | 4 |
| 6 | <b>801.4738</b> | 401.2405        | 784.4472       | 392.7272         | 783.4632       | 392.2352         | E    | 488.2827        | 244.6450        | 471.2562       | 236.1317         | 470.2722        | 235.6397         | 3 |
| 7 | <b>985.5949</b> | 493.3011        | 968.5684       | 484.7878         | 967.5844       | 484.2958         | K    | <b>359.2401</b> | 180.1237        | 342.2136       | 171.6104         |                 |                  | 2 |
| 8 |                 |                 |                |                  |                |                  | R    | <b>175.1190</b> | 88.0637         | 158.0924       | 79.5498          |                 |                  | 1 |

Found in **Q9UMN6**, Histone-lysine N-methyltransferase MLL4 OS=Homo sapiens GN=WBP7 PE=1 SV=1

Match to Query 11378: 1553.887548 from(777.951050,2+) intensity(126050.6250)

Title: File320 Spectrum13553 scans: 15086

Data file \\192.168.1.104\public\raw data\Elite\_01\methylation\_ZW\k562\2013-5-23-562-Kpropio-methyl-IP-Fr5-ZW.mgf

Click mouse within plot area to zoom in by factor of two about that point

Or,  to  Da Label all possible matches  Label matches used for scoring 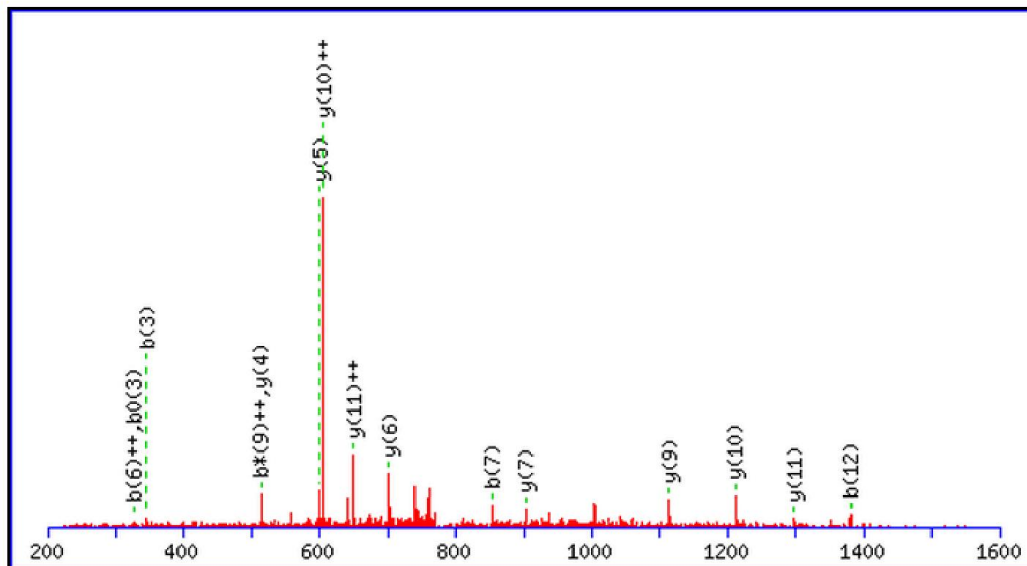

Monoisotopic mass of neutral peptide Mr(calc): 1553.8838

Fixed modifications: Carbamidomethyl (C) (apply to all)

Variable modifications:

K7 : Propionyl-(13CD3)Methyl (K)

Ions Score: 37 Expect: 0.088

Matches : 15/120 fragment ions using 28 most intense

| #  | b                | b <sup>++</sup> | b <sup>*</sup> | b <sup>+++</sup> | b <sup>0</sup>  | b <sup>0++</sup> | Seq. | y                | y <sup>++</sup> | y <sup>*</sup> | y <sup>+++</sup> | y <sup>0</sup> | y <sup>0++</sup> | #  |
|----|------------------|-----------------|----------------|------------------|-----------------|------------------|------|------------------|-----------------|----------------|------------------|----------------|------------------|----|
| 1  | 187.0866         | 94.0469         |                |                  |                 |                  | W    |                  |                 |                |                  |                |                  | 13 |
| 2  | 258.1237         | 129.5655        |                |                  |                 |                  | A    | 1368.8118        | 684.9095        | 1351.7853      | 676.3963         | 1350.8012      | 675.9043         | 12 |
| 3  | <b>345.1557</b>  | 173.0815        |                |                  | <b>327.1452</b> | 164.0762         | S    | <b>1297.7747</b> | <b>649.3910</b> | 1280.7481      | 640.8777         | 1279.7641      | 640.3857         | 11 |
| 4  | 442.2085         | 221.6079        |                |                  | 424.1979        | 212.6026         | P    | <b>1210.7427</b> | <b>605.8750</b> | 1193.7161      | 597.3617         | 1192.7321      | 596.8697         | 10 |
| 5  | 539.2613         | 270.1343        |                |                  | 521.2507        | 261.1290         | P    | <b>1113.6899</b> | 557.3486        | 1096.6634      | 548.8353         | 1095.6793      | 548.3433         | 9  |
| 6  | 652.3453         | <b>326.6763</b> |                |                  | 634.3348        | 317.6710         | L    | 1016.6371        | 508.8222        | 999.6106       | 500.3089         | 998.6266       | 499.8169         | 8  |
| 7  | <b>854.5043</b>  | 427.7558        | 837.4778       | 419.2425         | 836.4938        | 418.7505         | K    | <b>903.5531</b>  | 452.2802        | 886.5265       | 443.7669         | 885.5425       | 443.2749         | 7  |
| 8  | 955.5520         | 478.2796        | 938.5255       | 469.7664         | 937.5415        | 469.2744         | T    | <b>701.3941</b>  | 351.2007        | 684.3675       | 342.6874         | 683.3835       | 342.1954         | 6  |
| 9  | 1042.5840        | 521.7957        | 1025.5575      | <b>513.2824</b>  | 1024.5735       | 512.7904         | S    | <b>600.3464</b>  | 300.6768        | 583.3198       | 292.1636         | 582.3358       | 291.6715         | 5  |
| 10 | 1139.6368        | 570.3220        | 1122.6103      | 561.8088         | 1121.6262       | 561.3168         | P    | <b>513.3144</b>  | 257.1608        | 496.2878       | 248.6475         |                |                  | 4  |
| 11 | 1267.6954        | 634.3513        | 1250.6688      | 625.8381         | 1249.6848       | 625.3460         | Q    | 416.2616         | 208.6344        | 399.2350       | 200.1212         |                |                  | 3  |
| 12 | <b>1380.7794</b> | 690.8934        | 1363.7529      | 682.3801         | 1362.7689       | 681.8881         | L    | 288.2030         | 144.6051        | 271.1765       | 136.0919         |                |                  | 2  |
| 13 |                  |                 |                |                  |                 |                  | R    | 175.1190         | 88.0631         | 158.0924       | 79.5498          |                |                  | 1  |

Found in **B2RPK0**, Putative high mobility group protein B1-like 1 OS=Homo sapiens GN=HMGB1P1 PE=5 SV=1

Match to Query 6613: 1223.714208 from(612.864380,2+) intensity(135332.8750)

Title: File320 Spectrum9934 scans: 11226

Data file \\192.168.1.104\public\raw data\Elite\_01\methylation\_ZW\k562\2013-5-23-562-Kpropio-methyl-IP-Fr5-ZW.mgf

Click mouse within plot area to zoom in by factor of two about that point

Or, Plot from  to  Da Label all possible matches  Label matches used for scoring 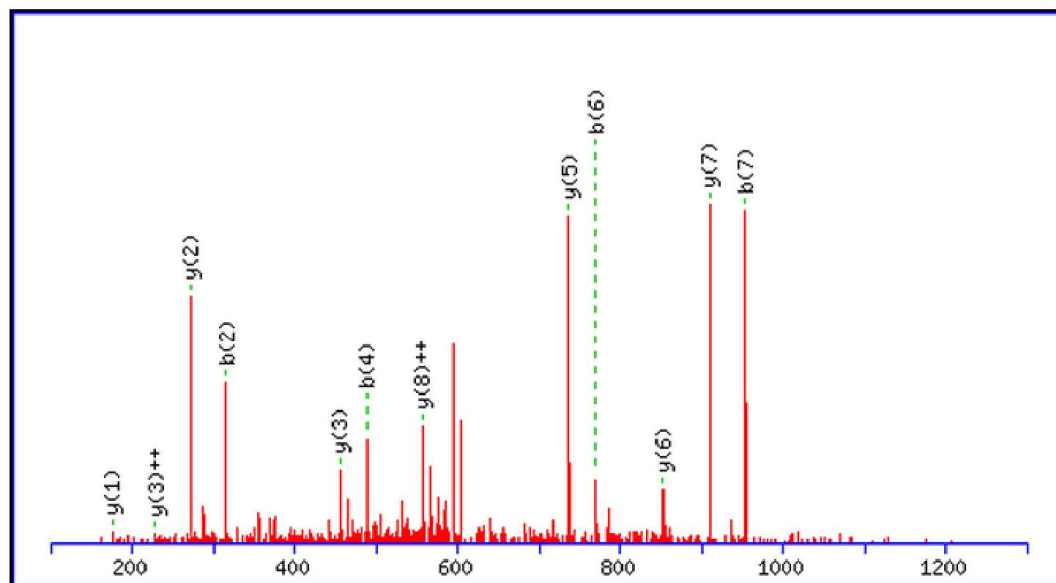Monoisotopic mass of neutral peptide  $M_r(\text{calc})$ : 1223.7146

Fixed modifications: Carbamidomethyl (C) (apply to specified residues or termini only)

Variable modifications:

N-term : Propionyl (protein N-term)

K2 : Propionyl-(13CD3)Methyl (K)

K6 : Propionyl (K)

K7 : Propionyl (K)

Ions Score: 37 Expect: 0.068

Matches : 12/78 fragment ions using

| # | b               | b <sup>++</sup> | b <sup>*</sup> | b <sup>+++</sup> | b <sup>0</sup> | b <sup>0++</sup> | Seq. | y               | y <sup>++</sup> | y <sup>*</sup> | y <sup>+++</sup> | y <sup>0</sup> | y <sup>0++</sup> | # |
|---|-----------------|-----------------|----------------|------------------|----------------|------------------|------|-----------------|-----------------|----------------|------------------|----------------|------------------|---|
| 1 | 114.0550        | 57.5311         |                |                  |                |                  | G    |                 |                 |                |                  |                |                  | 9 |
| 2 | <b>316.2140</b> | 158.6106        | 299.1874       | 150.0973         |                |                  | K    | 1111.6743       | <b>556.3408</b> | 1094.6477      | 547.8275         | 1093.6637      | 547.3355         | 8 |
| 3 | 373.2354        | 187.1214        | 356.2089       | 178.6081         |                |                  | G    | <b>909.5152</b> | 455.2613        | 892.4887       | 446.7480         | 891.5047       | 446.2560         | 7 |
| 4 | <b>488.2624</b> | 244.6348        | 471.2358       | 236.1216         | 470.2518       | 235.6295         | D    | <b>852.4938</b> | 426.7505        | 835.4672       | 418.2373         | 834.4832       | 417.7452         | 6 |
| 5 | 585.3151        | 293.1612        | 568.2886       | 284.6479         | 567.3046       | 284.1559         | P    | <b>737.4668</b> | 369.2371        | 720.4403       | 360.7238         |                |                  | 5 |
| 6 | <b>769.4363</b> | 385.2218        | 752.4098       | 376.7085         | 751.4258       | 376.2165         | K    | 640.4141        | 320.7107        | 623.3875       | 312.1974         |                |                  | 4 |
| 7 | <b>953.5575</b> | 477.2824        | 936.5309       | 468.7691         | 935.5469       | 468.2771         | K    | <b>456.2929</b> | <b>228.6501</b> | 439.2663       | 220.1368         |                |                  | 3 |
| 8 | 1050.6103       | 525.8088        | 1033.5837      | 517.2955         | 1032.5997      | 516.8035         | P    | <b>272.1717</b> | 136.5895        | 255.1452       | 128.0762         |                |                  | 2 |
| 9 |                 |                 |                |                  |                |                  | R    | <b>175.1190</b> | 88.0631         | 158.0924       | 79.5498          |                |                  | 1 |

Found in **B4DX32**, DNA/RNA-binding protein KIN17 OS=Homo sapiens GN=KIN PE=2 SV=1

Match to Query 8520: 1355.876928 from(678.945740,2+) intensity(285733.1250)

Title: File320 Spectrum13216 scans: 14727

Data file \\192.168.1.104\public\raw data\Elite\_01\methylation\_ZW\k562\2013-5-23-562-Kpropio-methyl-IP-Fr5-ZW.mgf

Click mouse within plot area to zoom in by factor of two about that point

Or,   to  Da Label all possible matches  Label matches used for scoring 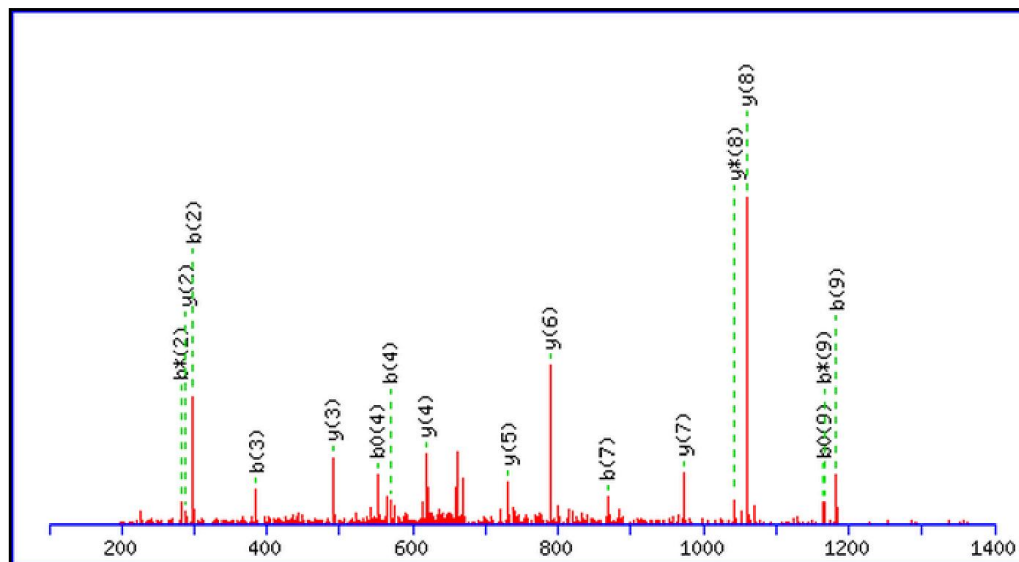

Monoisotopic mass of neutral peptide Mr(calc): 1355.8773

Fixed modifications: Carbamido

Variable modifications:

K2 : Propionyl (K)

K4 : Propionyl (K)

K8 : Propionyl-(13CD3)Meth

Ions Score: 39 Expect: 0.0083

Matches : 17/88 fragment ions

| #  | b                | b <sup>++</sup> | b*               | b <sup>+++</sup> | b <sup>0</sup>   | b <sup>0++</sup> | Seq. | y                | y <sup>++</sup> | y*               | y <sup>+++</sup> | y <sup>0</sup> | y <sup>0++</sup> | #  |
|----|------------------|-----------------|------------------|------------------|------------------|------------------|------|------------------|-----------------|------------------|------------------|----------------|------------------|----|
| 1  | 114.0913         | 57.5493         |                  |                  |                  |                  | I    |                  |                 |                  |                  |                |                  | 10 |
| 2  | <b>298.2125</b>  | 149.6099        | <b>281.1860</b>  | 141.0966         |                  |                  | K    | 1243.8005        | 622.4039        | 1226.7740        | 613.8906         | 1225.7900      | 613.3986         | 9  |
| 3  | <b>385.2445</b>  | 193.1259        | 368.2180         | 184.6126         | 367.2340         | 184.1206         | S    | <b>1059.6793</b> | 530.3433        | <b>1042.6528</b> | 521.8300         | 1041.6688      | 521.3380         | 8  |
| 4  | <b>569.3657</b>  | 285.1865        | 552.3392         | 276.6732         | <b>551.3552</b>  | 276.1812         | K    | <b>972.6473</b>  | 486.8273        | 955.6208         | 478.3140         |                |                  | 7  |
| 5  | 626.3872         | 313.6972        | 609.3606         | 305.1840         | 608.3766         | 304.6919         | G    | <b>788.5261</b>  | 394.7667        | 771.4996         | 386.2534         |                |                  | 6  |
| 6  | 739.4713         | 370.2393        | 722.4447         | 361.7260         | 721.4607         | 361.2340         | L    | <b>731.5047</b>  | 366.2560        | 714.4781         | 357.7427         |                |                  | 5  |
| 7  | <b>867.5298</b>  | 434.2686        | 850.5033         | 425.7553         | 849.5193         | 425.2633         | Q    | <b>618.4206</b>  | 309.7139        | 601.3941         | 301.2007         |                |                  | 4  |
| 8  | 1069.6888        | 535.3481        | 1052.6623        | 526.8348         | 1051.6783        | 526.3428         | K    | <b>490.3620</b>  | 245.6847        | 473.3355         | 237.1714         |                |                  | 3  |
| 9  | <b>1182.7729</b> | 591.8901        | <b>1165.7464</b> | 583.3768         | <b>1164.7623</b> | 582.8848         | L    | <b>288.2030</b>  | 144.6051        | 271.1765         | 136.0919         |                |                  | 2  |
| 10 |                  |                 |                  |                  |                  |                  | R    | 175.1190         | 88.0631         | 158.0924         | 79.5498          |                |                  | 1  |

Found in **Q9C0D4**, Zinc finger protein 518B OS=Homo sapiens GN=ZNF518B PE=2 SV=2

Match to Query 10987: 1520.958708 from(761.486630,2+) intensity(53742.7578)

Title: File320 Spectrum13604 scans: 15140

Data file \\192.168.1.104\public\raw data\Elite\_01\methylation\_ZW\k562\2013-5-23-562-Kpropio-methyl-IP-Fr5-ZW.mgf

Click mouse within plot area to zoom in by factor of two about that point

Or,   to  Da Label all possible matches  Label matches used for scoring 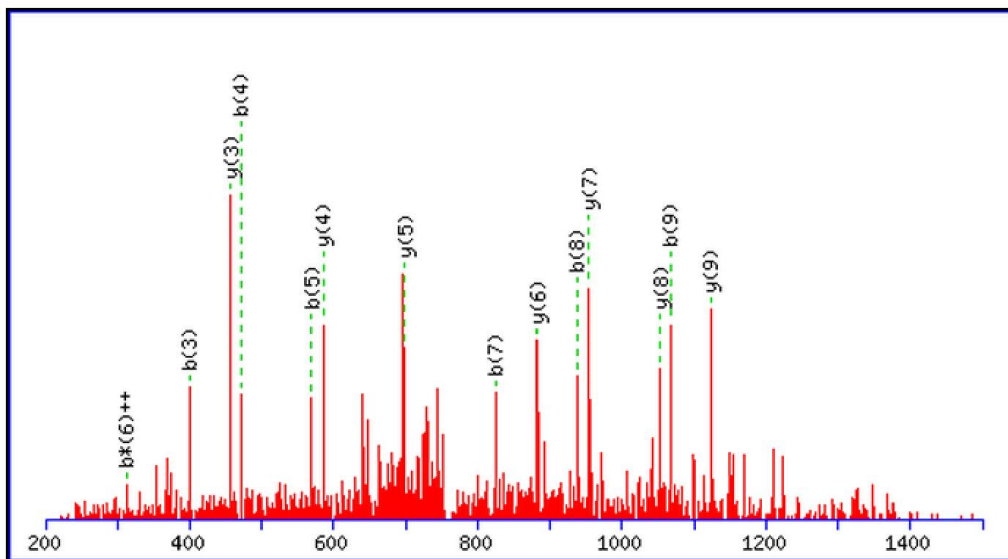

Monoisotopic mass of neutral peptide Mr(calc): 1520.9563

Fixed modifications: Carbamidomethyl (C) (a)

Variable modifications:

K3 : Propionyl-(13CD3)Methyl (K)

K7 : Propionyl (K)

K11 : Propionyl (K)

Ions Score: 40 Expect: 0.0085

Matches : 14/106 fragment ions using 26 mos

| #  | b                | b <sup>++</sup> | b*        | b <sup>+++</sup> | b <sup>0</sup> | b <sup>0++</sup> | Seq. | y                | y <sup>++</sup> | y*        | y <sup>+++</sup> | y <sup>0</sup> | y <sup>0++</sup> | #  |
|----|------------------|-----------------|-----------|------------------|----------------|------------------|------|------------------|-----------------|-----------|------------------|----------------|------------------|----|
| 1  | 98.0600          | 49.5337         |           |                  |                |                  | P    |                  |                 |           |                  |                |                  | 12 |
| 2  | 197.1285         | 99.0679         |           |                  |                |                  | V    | 1424.9108        | 712.9590        | 1407.8842 | 704.4458         | 1406.9002      | 703.9538         | 11 |
| 3  | <b>399.2875</b>  | 200.1474        | 382.2609  | 191.6341         |                |                  | K    | 1325.8424        | 663.4248        | 1308.8158 | 654.9116         | 1307.8318      | 654.4195         | 10 |
| 4  | <b>470.3246</b>  | 235.6659        | 453.2980  | 227.1527         |                |                  | A    | <b>1123.6834</b> | 562.3453        | 1106.6568 | 553.8320         | 1105.6728      | 553.3400         | 9  |
| 5  | <b>569.3930</b>  | 285.2001        | 552.3664  | 276.6869         |                |                  | V    | <b>1052.6463</b> | 526.8268        | 1035.6197 | 518.3135         | 1034.6357      | 517.8215         | 8  |
| 6  | 640.4301         | 320.7187        | 623.4036  | <b>312.2054</b>  |                |                  | A    | <b>953.5778</b>  | 477.2926        | 936.5513  | 468.7793         | 935.5673       | 468.2873         | 7  |
| 7  | <b>824.5513</b>  | 412.7793        | 807.5247  | 404.2660         |                |                  | K    | <b>882.5407</b>  | 441.7740        | 865.5142  | 433.2607         | 864.5302       | 432.7687         | 6  |
| 8  | <b>937.6354</b>  | 469.3213        | 920.6088  | 460.8080         |                |                  | L    | <b>698.4196</b>  | 349.7134        | 681.3930  | 341.2001         | 680.4090       | 340.7081         | 5  |
| 9  | <b>1066.6779</b> | 533.8426        | 1049.6514 | 525.3293         | 1048.6674      | 524.8373         | E    | <b>585.3355</b>  | 293.1714        | 568.3089  | 284.6581         | 567.3249       | 284.1661         | 4  |
| 10 | 1163.7307        | 582.3690        | 1146.7042 | 573.8557         | 1145.7201      | 573.3637         | P    | <b>456.2929</b>  | 228.6501        | 439.2663  | 220.1368         |                |                  | 3  |
| 11 | 1347.8519        | 674.4296        | 1330.8253 | 665.9163         | 1329.8413      | 665.4243         | K    | 359.2401         | 180.1237        | 342.2136  | 171.6104         |                |                  | 2  |
| 12 |                  |                 |           |                  |                |                  | R    | 175.1190         | 88.0631         | 158.0924  | 79.5498          |                |                  | 1  |

Found in **Q9Y483**, Metal-response element-binding transcription factor 2 OS=Homo sapiens GN=MTF2 PE=1 SV=2MS/MS Fragmentation of **KASKPISDSR**Found in **Q9Y483**, Metal-response element-binding transcription factor 2 OS=Homo sapiens GN=MTF2 PE=1 SV=2

Match to Query 6483: 1217.688568 from(609.851560, 2+) intensity(39773.0859)

Title: File320 Spectrum5673 scans: 6673

(Data file \\192.168.1.104\public\raw data\Elite\_01\methylation\_ZW\k562\2013-5-23-562-Kpropio-methyl-IP-Fr5-ZW.mgf

Click mouse within plot area to zoom in by factor of two about that point

Or, Plot from  to  DaLabel all possible matches  Label matches used for scoring 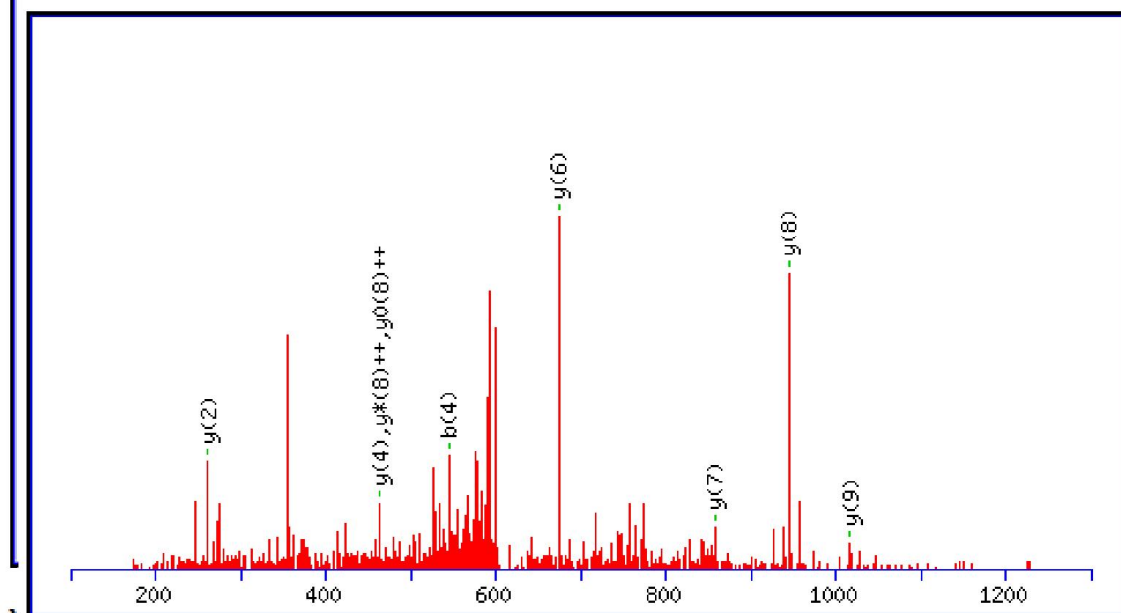

Monoisotopic mass of neutral peptide Mr(calc):

Fixed modifications: Carbamidomethyl (C) (apply to

Variable modifications:

K1 : Propionyl-(13CD3)Methyl (K)

K4 : Propionyl (K)

Ions Score: 40 Expect: 0.039

Matches : 9/102 fragment ions using 10 most intense p

| #  | b               | b <sup>++</sup> | b <sup>+</sup> | b <sup>+</sup> ++ | b <sup>0</sup> | b <sup>0</sup> ++ | Seq. | y                | y <sup>++</sup> | y <sup>*</sup> | y <sup>*</sup> ++ | y <sup>0</sup> | y <sup>0</sup> ++ | #  |
|----|-----------------|-----------------|----------------|-------------------|----------------|-------------------|------|------------------|-----------------|----------------|-------------------|----------------|-------------------|----|
| 1  | 203.1663        | 102.0868        | 186.1397       | 93.5735           |                |                   | K    |                  |                 |                |                   |                |                   | 10 |
| 2  | 274.2034        | 137.6053        | 257.1769       | 129.0921          |                |                   | A    | <b>1016.5371</b> | 508.7722        | 999.5106       | 500.2589          | 998.5265       | 499.7669          | 9  |
| 3  | 361.2354        | 181.1214        | 344.2089       | 172.6081          | 343.2249       | 172.1161          | S    | <b>945.5000</b>  | 473.2536        | 928.4734       | <b>464.7404</b>   | 927.4894       | <b>464.2483</b>   | 8  |
| 4  | <b>545.3566</b> | 273.1819        | 528.3301       | 264.6687          | 527.3460       | 264.1767          | K    | <b>858.4680</b>  | 429.7376        | 841.4414       | 421.2243          | 840.4574       | 420.7323          | 7  |
| 5  | 642.4094        | 321.7083        | 625.3828       | 313.1951          | 624.3988       | 312.7030          | P    | <b>674.3468</b>  | 337.6770        | 657.3202       | 329.1638          | 656.3362       | 328.6717          | 6  |
| 6  | 755.4934        | 373.2504        | 738.4669       | 369.7371          | 737.4829       | 369.2451          | I    | 577.2940         | 289.1506        | 560.2675       | 280.6374          | 559.2835       | 280.1454          | 5  |
| 7  | 842.5255        | 421.7664        | 825.4989       | 413.2531          | 824.5149       | 412.7611          | S    | <b>464.2100</b>  | 232.6086        | 447.1834       | 224.0953          | 446.1994       | 223.6033          | 4  |
| 8  | 957.5524        | 479.2798        | 940.5259       | 470.7666          | 939.5418       | 470.2746          | D    | 377.1779         | 189.0926        | 360.1514       | 180.5793          | 359.1674       | 180.0873          | 3  |
| 9  | 1044.5844       | 522.7959        | 1027.5579      | 514.2826          | 1026.5739      | 513.7906          | S    | <b>262.1510</b>  | 131.5791        | 245.1244       | 123.0659          | 244.1404       | 122.5738          | 2  |
| 10 |                 |                 |                |                   |                |                   | R    | 175.1190         | 88.0631         | 158.0924       | 79.5498           |                |                   | 1  |

Found in **Q86UX7**, Fermitin family homolog 3 OS=Homo sapiens GN=FERMT3 PE=1 SV=1

Match to Query 4952: 1107.692348 from(554.853450,2+) intensity(127852.6641)

Title: File320 Spectrum13283 scans: 14798

Data file \\192.168.1.104\public\raw data\Elite\_01\methylation\_ZW\k562\2013-5-23-562-Kpropio-methyl-IP-Fr5-ZW.mgf

Click mouse within plot area to zoom in by factor of two about that point

Or,  150 to 1150 Da Label all possible matches  Label matches used for scoring 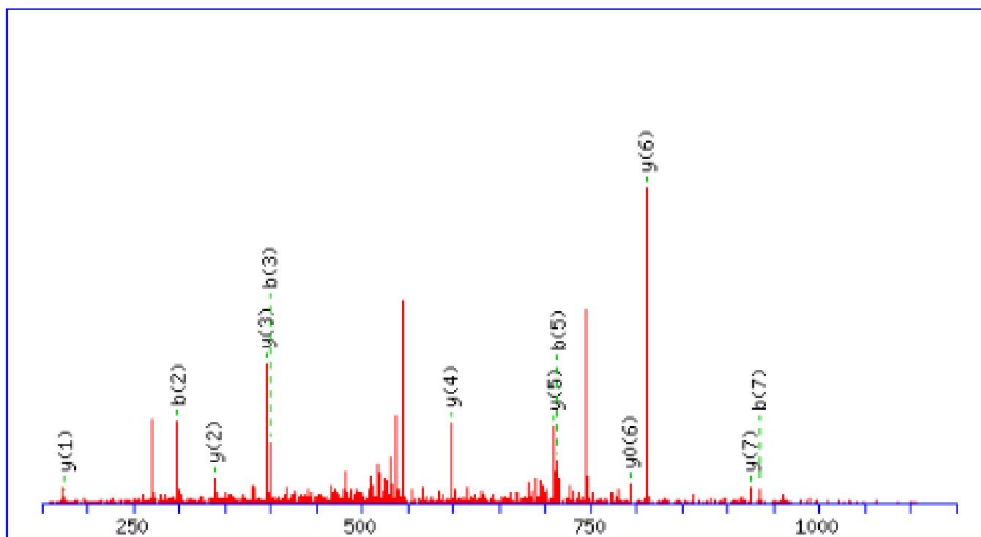

Monoisotopic mass of neutral peptide Mr(calc): 1107.6924

Fixed modifications: Carbamidomethyl (C) (apply to specified residues or termini only)

Variable modifications:

K1 : Propionyl (K)

K5 : Propionyl-(13CD3)Methyl (K)

Ions Score: 43 Expect: 0.0082

Matches : 12/70 fragment ions using 30 most intense peaks

| # | b               | b <sup>++</sup> | b <sup>*</sup> | b <sup>+++</sup> | b <sup>0</sup> | b <sup>0++</sup> | Seq. | y               | y <sup>++</sup> | y <sup>*</sup> | y <sup>+++</sup> | y <sup>0</sup>  | y <sup>0++</sup> | # |
|---|-----------------|-----------------|----------------|------------------|----------------|------------------|------|-----------------|-----------------|----------------|------------------|-----------------|------------------|---|
| 1 | 185.1285        | 93.0679         | 168.1019       | 84.5546          |                |                  | K    |                 |                 |                |                  |                 |                  | 8 |
| 2 | <b>298.2125</b> | 149.6099        | 281.1860       | 141.0966         |                |                  | L    | <b>924.5786</b> | 462.7929        | 907.5520       | 454.2796         | 906.5680        | 453.7876         | 7 |
| 3 | <b>399.2602</b> | 200.1337        | 382.2336       | 191.6205         | 381.2496       | 191.1285         | T    | <b>811.4945</b> | 406.2509        | 794.4680       | 397.7376         | <b>793.4839</b> | 397.2456         | 6 |
| 4 | 512.3443        | 256.6758        | 495.3177       | 248.1625         | 494.3337       | 247.6705         | L    | <b>710.4468</b> | 355.7270        | 693.4203       | 347.2138         |                 |                  | 5 |
| 5 | <b>714.5033</b> | 357.7553        | 697.4767       | 349.2420         | 696.4927       | 348.7500         | K    | <b>597.3628</b> | 299.1850        | 580.3362       | 290.6717         |                 |                  | 4 |
| 6 | 771.5247        | 386.2660        | 754.4982       | 377.7527         | 753.5142       | 377.2607         | G    | <b>395.2037</b> | 198.1055        | 378.1772       | 189.5922         |                 |                  | 3 |
| 7 | <b>934.5881</b> | 467.7977        | 917.5615       | 459.2844         | 916.5775       | 458.7924         | Y    | <b>338.1823</b> | 169.5948        | 337.1557       | 161.0815         |                 |                  | 2 |
| 8 |                 |                 |                |                  |                |                  | R    | <b>175.1190</b> | 88.0631         | 158.0924       | 79.5498          |                 |                  | 1 |



Found in **P46777**, 60S ribosomal protein L5 OS=Homo sapiens GN=RPL5 PE=1 SV=3

Match to Query 7346: 1276.776828 from(639.395690,2+) intensity(72028.1797)

Title: File320 Spectrum13018 scans: 14515

Data file \\192.168.1.104\public\raw data\Elite\_01\methylation\_ZW\k562\2013-5-23-562-Kpropio-methyl-IP-Fr5-ZW.mgf

Click mouse within plot area to zoom in by factor of two about that point

Or,  100 to 1300 Da Label all possible matches  Label matches used for scoring 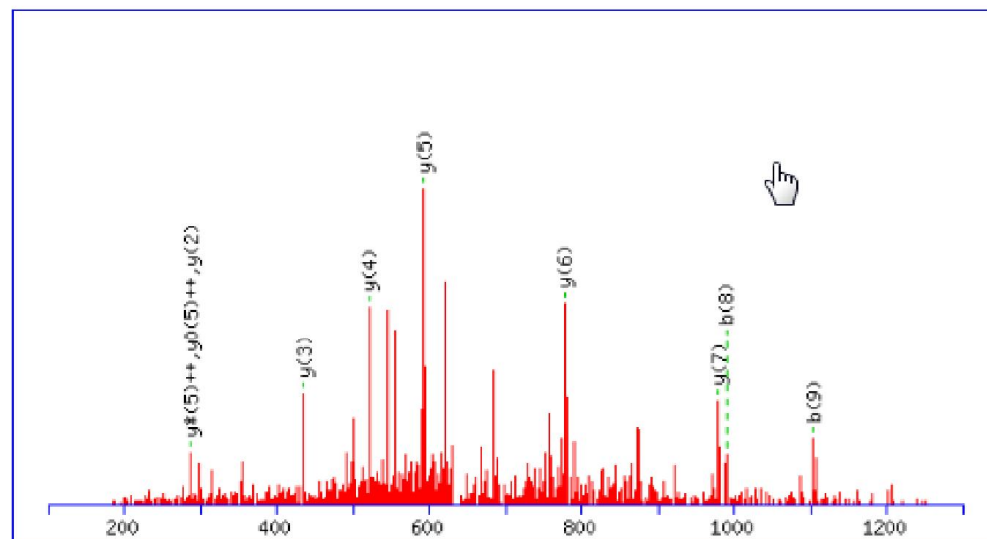

Monoisotopic mass of neutral peptide Mr(calc): 1276.7776

Fixed modifications: Carbamidomethyl (C) (apply to specified residues or termini only)

Variable modifications:

K4 : Propionyl-(13CD3)Methyl (K)

K5 : Propionyl (K)

Ions Score: 44 Expect: 0.011

Matches : 10/86 fragment ions using 11 most intense peaks

| #  | b                | b <sup>++</sup> | b <sup>*</sup> | b <sup>+++</sup> | b <sup>0</sup> | b <sup>0++</sup> | Seq. | y               | y <sup>++</sup> | y <sup>*</sup> | y <sup>+++</sup> | y <sup>0</sup> | y <sup>0++</sup> | #  |
|----|------------------|-----------------|----------------|------------------|----------------|------------------|------|-----------------|-----------------|----------------|------------------|----------------|------------------|----|
| 1  | 100.0757         | 50.5415         |                |                  |                |                  | V    |                 |                 |                |                  |                |                  | 10 |
| 2  | 171.1128         | 86.0600         |                |                  |                |                  | A    | 1178.7165       | 589.8619        | 1161.6899      | 581.3486         | 1160.7059      | 580.8566         | 9  |
| 3  | 299.1714         | 150.0893        | 282.1448       | 141.5761         |                |                  | Q    | 1107.6793       | 554.3433        | 1090.6528      | 545.8300         | 1089.6688      | 545.3380         | 8  |
| 4  | 501.3304         | 251.1688        | 484.3038       | 242.6556         |                |                  | K    | <b>979.6208</b> | 490.3140        | 962.5942       | 481.8007         | 961.6102       | 481.3087         | 7  |
| 5  | 685.4516         | 343.2294        | 668.4250       | 334.7162         |                |                  | K    | <b>777.4617</b> | 389.2345        | 760.4352       | 380.7212         | 759.4512       | 380.2292         | 6  |
| 6  | 756.4887         | 378.7480        | 739.4621       | 370.2347         |                |                  | A    | <b>593.3406</b> | 297.1739        | 576.3140       | <b>288.6606</b>  | 575.3300       | <b>288.1686</b>  | 5  |
| 7  | 843.5207         | 422.2640        | 826.4942       | 413.7507         | 825.5101       | 413.2587         | S    | <b>522.3035</b> | 261.6554        | 505.2769       | 253.1421         | 504.2929       | 252.6501         | 4  |
| 8  | <b>990.5891</b>  | 495.7982        | 973.5626       | 487.2849         | 972.5786       | 486.7929         | F    | <b>435.2714</b> | 218.1394        | 418.2449       | 209.6261         |                |                  | 3  |
| 9  | <b>1103.6732</b> | 552.3402        | 1086.6466      | 543.8270         | 1085.6626      | 543.3350         | L    | <b>288.2030</b> | 144.6051        | 271.1765       | 136.0919         |                |                  | 2  |
| 10 |                  |                 |                |                  |                |                  | R    | 175.1190        | 88.0631         | 158.0924       | 79.5498          |                |                  | 1  |

Found in **K7EL20**, Eukaryotic translation initiation factor 3 subunit G (Fragment) OS=Homo sapiens GN=EIF3G PE=3 SV=1

Match to Query 2730: 959.604108 from(480.809330,2+) intensity(37284.5273)

Title: File320 Spectrum4575 scans: 5500

Data file \\192.168.1.104\public\raw data\Elite\_01\methylation\_ZW\k562\2013-5-23-562-Kpropio-methyl-IP-Fr5-ZW.mgf

Click mouse within plot area to zoom in by factor of two about that point

Or,   to  Da Label all possible matches  Label matches used for scoring 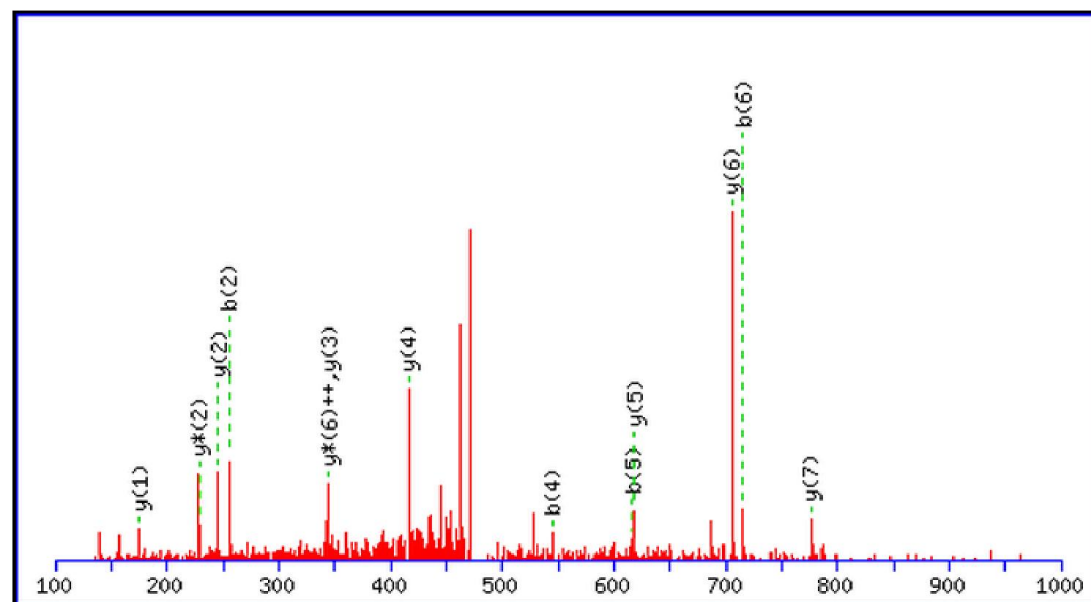

Monoisotopic mass of neutral peptide Mr(calc): 959.6036

Fixed modifications: Carbamidomethyl (C) (apply to specified residues or termini only)

Variable modifications:

K1 : Propionyl (K)

K4 : Propionyl-(13CD3)Methyl (K)

Ions Score: 50 Expect: 0.0019

Matches : 13/70 fragment ions using

| # | b               | b <sup>++</sup> | b <sup>*</sup> | b <sup>*++</sup> | b <sup>0</sup> | b <sup>0++</sup> | Seq. | y               | y <sup>++</sup> | y <sup>*</sup>  | y <sup>*++</sup> | y <sup>0</sup> | y <sup>0++</sup> | # |
|---|-----------------|-----------------|----------------|------------------|----------------|------------------|------|-----------------|-----------------|-----------------|------------------|----------------|------------------|---|
| 1 | 185.1285        | 93.0679         | 168.1019       | 84.5546          |                |                  | K    |                 |                 |                 |                  |                |                  | 8 |
| 2 | <b>256.1656</b> | 128.5864        | 239.1390       | 120.0731         |                |                  | A    | <b>776.4897</b> | 388.7485        | 759.4632        | 380.2352         | 758.4792       | 379.7432         | 7 |
| 3 | 343.1976        | 172.1024        | 326.1710       | 163.5892         | 325.1870       | 163.0972         | S    | <b>705.4526</b> | 353.2300        | 688.4261        | <b>344.7167</b>  | 687.4421       | 344.2247         | 6 |
| 4 | <b>545.3566</b> | 273.1819        | 528.3301       | 264.6687         | 527.3460       | 264.1767         | K    | <b>618.4206</b> | 309.7139        | 601.3941        | 301.2007         |                |                  | 5 |
| 5 | <b>616.3937</b> | 308.7005        | 599.3672       | 300.1872         | 598.3832       | 299.6952         | A    | <b>416.2616</b> | 208.6344        | 399.2350        | 200.1212         |                |                  | 4 |
| 6 | <b>715.4621</b> | 358.2347        | 698.4356       | 349.7214         | 697.4516       | 349.2294         | V    | <b>345.2245</b> | 173.1159        | 328.1979        | 164.6026         |                |                  | 3 |
| 7 | 786.4993        | 393.7533        | 769.4727       | 385.2400         | 768.4887       | 384.7480         | A    | <b>246.1561</b> | 123.5817        | <b>229.1295</b> | 115.0684         |                |                  | 2 |
| 8 |                 |                 |                |                  |                |                  | R    | <b>175.1190</b> | 88.0631         | 158.0924        | 79.5498          |                |                  | 1 |

Found in **H0Y6G2**, Calcium/calmodulin-dependent protein kinase type II subunit gamma (Fragment) OS=Homo sapiens GN=CAMK2G PE=4 SV=1

Match to Query 11054: 1664.045628 from(833.030090,2+) intensity(97248.1016)

Title: File375 Spectrum15750 scans: 18267

Data file \\192.168.1.104\public\raw data\Elite\_01\methylation\_ZW\k562\2013-5-15-562-Kpropio-methyl-IP-Fr4-ZW.mgf

Click mouse within plot area to zoom in by factor of two about that point

Or,   to  Da Label all possible matches  Label matches used for scoring 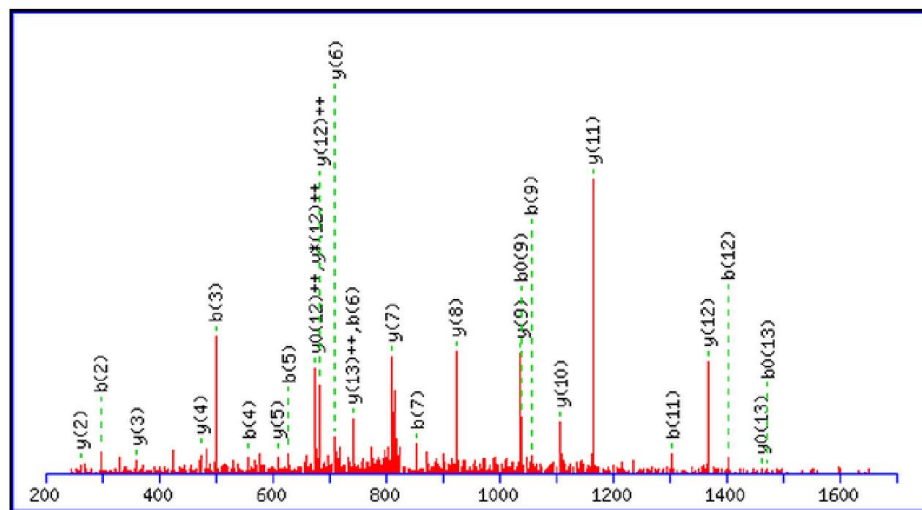

Monoisotopic mass of neutral peptide Mr(calc): 1664.0452

Fixed modifications: Carbamidomethyl (C) (apply to specified residues or termini only)

Variable modifications:

K1 : Propionyl (K)

K3 : Propionyl-(13CD3)Methyl (K)

M10 : Label:13C(1)2H(3) (M)

Ions Score: 60 Expect: 6.7e-005

Matches : 27/140 fragment ions using 58 most intense

| #  | b                | b <sup>++</sup> | b <sup>*</sup> | b <sup>***</sup> | b <sup>0</sup>   | b <sup>0++</sup> | Seq. | y                | y <sup>++</sup> | y <sup>*</sup> | y <sup>***</sup> | y <sup>0</sup>   | y <sup>0++</sup> | #  |
|----|------------------|-----------------|----------------|------------------|------------------|------------------|------|------------------|-----------------|----------------|------------------|------------------|------------------|----|
| 1  | 185.1285         | 93.0679         | 168.1019       | 84.5546          |                  |                  | K    |                  |                 |                |                  |                  |                  | 14 |
| 2  | <b>298.2125</b>  | 149.6099        | 281.1860       | 141.0966         |                  |                  | L    | 1480.9313        | <b>740.9693</b> | 1463.9047      | 732.4560         | <b>1462.9207</b> | 731.9640         | 13 |
| 3  | <b>500.3715</b>  | 250.6894        | 483.3450       | 242.1761         |                  |                  | K    | <b>1367.8472</b> | <b>684.4272</b> | 1350.8207      | <b>675.9140</b>  | 1349.8366        | <b>675.4220</b>  | 12 |
| 4  | <b>557.3930</b>  | 279.2001        | 540.3664       | 270.6869         |                  |                  | G    | <b>1165.6882</b> | 583.3477        | 1148.6616      | 574.8345         | 1147.6776        | 574.3425         | 11 |
| 5  | <b>628.4301</b>  | 314.7187        | 611.4036       | 306.2054         |                  |                  | A    | <b>1108.6667</b> | 554.8370        | 1091.6402      | 546.3237         | 1090.6562        | 545.8317         | 10 |
| 6  | <b>741.5142</b>  | 371.2607        | 724.4876       | 362.7475         |                  |                  | I    | <b>1037.6296</b> | 519.3184        | 1020.6031      | 510.8052         | 1019.6190        | 510.3132         | 9  |
| 7  | <b>854.5982</b>  | 427.8028        | 837.5717       | 419.2895         |                  |                  | L    | <b>924.5456</b>  | 462.7764        | 907.5190       | 454.2631         | 906.5350         | 453.7711         | 8  |
| 8  | 955.6459         | 478.3266        | 938.6194       | 469.8133         | 937.6354         | 469.3213         | T    | <b>811.4615</b>  | 406.2344        | 794.4349       | 397.7211         | 793.4509         | 397.2291         | 7  |
| 9  | <b>1056.6936</b> | 528.8504        | 1039.6670      | 520.3372         | <b>1038.6830</b> | 519.8452         | T    | <b>710.4138</b>  | 355.7105        | 693.3873       | 347.1973         | 692.4032         | 346.7053         | 6  |
| 10 | 1191.7563        | 596.3818        | 1174.7297      | 587.8685         | 1173.7457        | 587.3765         | M    | <b>609.3661</b>  | 305.1867        | 592.3396       | 296.6734         | 591.3556         | 296.1814         | 5  |
| 11 | <b>1304.8403</b> | 652.9238        | 1287.8138      | 644.4105         | 1286.8298        | 643.9185         | L    | <b>474.3035</b>  | 237.6554        | 457.2769       | 229.1421         | 456.2929         | 228.6501         | 4  |
| 12 | <b>1403.9087</b> | 702.4580        | 1386.8822      | 693.9447         | 1385.8982        | 693.4527         | V    | <b>361.2194</b>  | 181.1133        | 344.1928       | 172.6001         | 343.2088         | 172.1081         | 3  |
| 13 | 1490.9408        | 745.9740        | 1473.9142      | 737.4607         | <b>1472.9302</b> | 736.9687         | S    | <b>262.1510</b>  | 131.5791        | 245.1244       | 123.0659         | 244.1404         | 122.5738         | 2  |
| 14 |                  |                 |                |                  |                  |                  | R    | 175.1190         | 88.0631         | 158.0924       | 79.5498          |                  |                  | 1  |

MS/MS Fragmentation of **PGTKLLLPR**Found in **Q9NYZ3**, G2 and S phase-expressed protein 1 OS=Homo sapiens GN=GTSE1 PE=1 SV=3

Match to Query 3191: 1067.707128 from(534.860840,2+) intensity(79356.2031)

Title: File375 Spectrum12028 scans: 13721

Data file \\192.168.1.104\public\raw data\Elite\_01\methylation\_ZW\k562\2013-5-15-562-Kpropio-methyl-IP-Fr4-ZW.mgf

Click mouse within plot area to zoom in by factor of two about that point

Or,  150 to  Da Label all possible matches  Label matches used for scoring 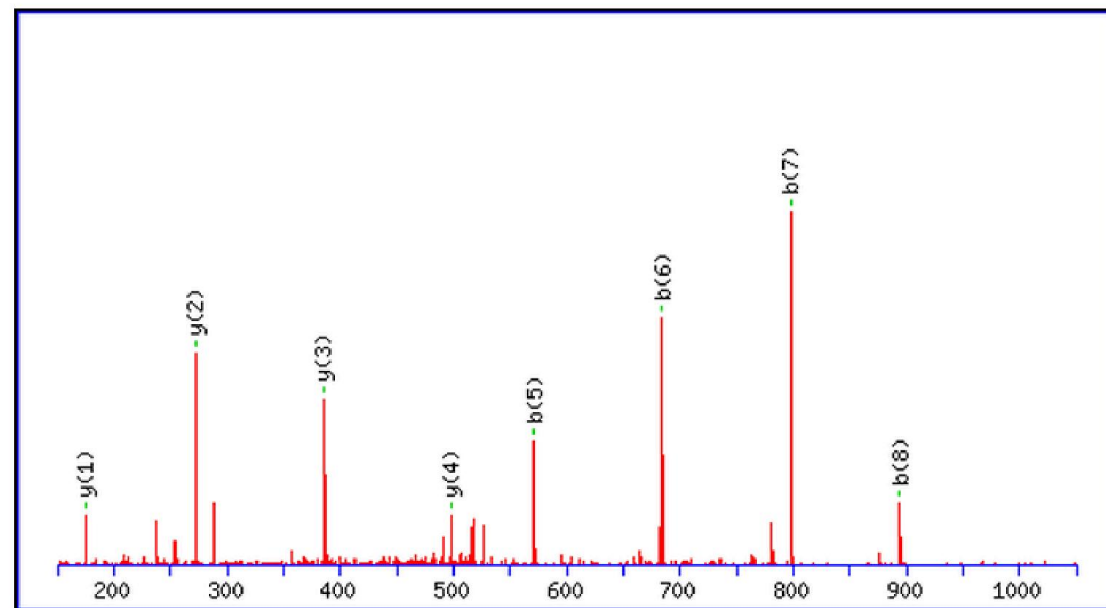

Monoisotopic mass of neutral pept

Fixed modifications: Carbamidomet

Variable modifications:

K4 : Propionyl-(13CD3)Methyl

Ions Score: 36 Expect: 0.016

Matches : 8/74 fragment ions usin

| # | b               | b <sup>++</sup> | b <sup>*</sup> | b <sup>**</sup> | b <sup>0</sup> | b <sup>0++</sup> | Seq. | y               | y <sup>++</sup> | y <sup>*</sup> | y <sup>**</sup> | y <sup>0</sup> | y <sup>0++</sup> | # |
|---|-----------------|-----------------|----------------|-----------------|----------------|------------------|------|-----------------|-----------------|----------------|-----------------|----------------|------------------|---|
| 1 | 98.0600         | 49.5337         |                |                 |                |                  | P    |                 |                 |                |                 |                |                  | 9 |
| 2 | 155.0815        | 78.0444         |                |                 |                |                  | G    | 971.6521        | 486.3297        | 954.6255       | 477.8164        | 953.6415       | 477.3244         | 8 |
| 3 | 256.1292        | 128.5682        |                |                 | 238.1186       | 119.5629         | T    | 914.6306        | 457.8189        | 897.6041       | 449.3057        | 896.6200       | 448.8137         | 7 |
| 4 | 458.2882        | 229.6477        | 441.2616       | 221.1345        | 440.2776       | 220.6425         | K    | 813.5829        | 407.2951        | 796.5564       | 398.7818        |                |                  | 6 |
| 5 | <b>571.3723</b> | 286.1898        | 554.3457       | 277.6765        | 553.3617       | 277.1845         | L    | 611.4239        | 306.2156        | 594.3974       | 297.7023        |                |                  | 5 |
| 6 | <b>684.4563</b> | 342.7318        | 667.4298       | 334.2185        | 666.4458       | 333.7265         | L    | <b>498.3398</b> | 249.6736        | 481.3133       | 241.1603        |                |                  | 4 |
| 7 | <b>797.5404</b> | 399.2738        | 780.5138       | 390.7606        | 779.5298       | 390.2685         | L    | <b>385.2558</b> | 193.1315        | 368.2292       | 184.6183        |                |                  | 3 |
| 8 | <b>894.5932</b> | 447.8002        | 877.5666       | 439.2869        | 876.5826       | 438.7949         | P    | <b>272.1717</b> | 136.5895        | 255.1452       | 128.0762        |                |                  | 2 |
| 9 |                 |                 |                |                 |                |                  | R    | <b>175.1190</b> | 88.0631         | 158.0924       | 79.5498         |                |                  | 1 |

MS/MS Fragmentation of **MVIITGPPEAQFKAQGR**

Found in **F8W930**, Insulin-like growth factor 2 mRNA-binding protein 2 OS=Homo sapiens GN=IGF2BP2 PE=2 SV=1

Match to Query 13917: 1920.070288 from(961.042420,2+) intensity(20393.0879)

Title: File375 Spectrum13309 scans: 15087

Data file \\192.168.1.104\public\raw data\Elite\_01\methylation\_ZW\k562\2013-5-15-562-Kpropio-methyl-IP-Fr4-ZW.mgf

Click mouse within plot area to zoom in by factor of two about that point

Or,  to  Da

Label all possible matches  Label matches used for scoring

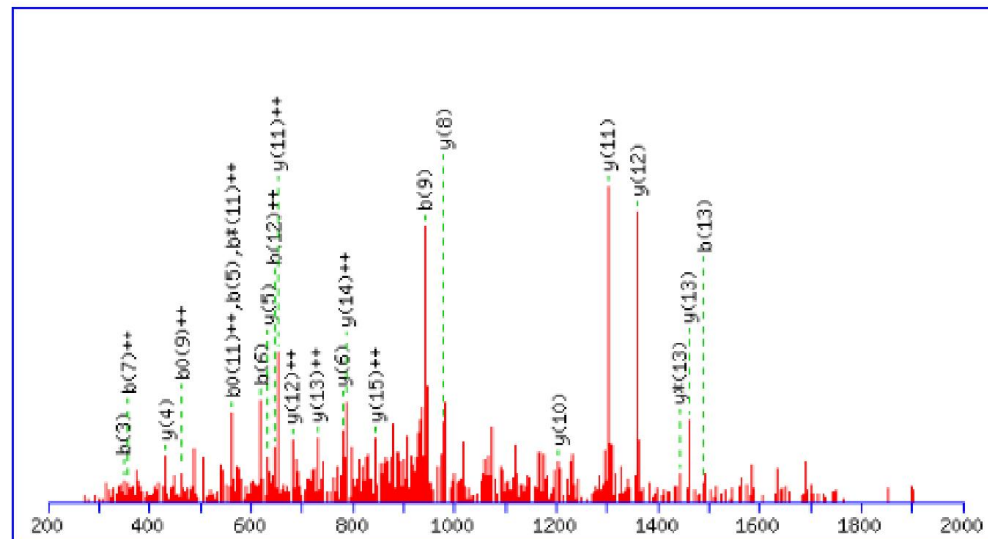

Monoisotopic mass of neutral peptide Mr(calc): 1920.0684

Fixed modifications: Carbamidomethyl (C) (apply to specified res.)

Variable modifications:

M1 : Label:13C(1)2H(3) (M)

K13 : Propionyl-(13CD3)Methyl (K)

Ions Score: 22 Expect: 3.2

Matches : 24/148 fragment ions using 63 most intense peaks [\(help\)](#)

| #  | b                | b <sup>++</sup> | b <sup>*</sup> | b <sup>+++</sup> | b <sup>0</sup> | b <sup>0++</sup> | Seq. | y                | y <sup>++</sup> | y <sup>*</sup>   | y <sup>+++</sup> | y <sup>0</sup> | y <sup>0++</sup> | #  |
|----|------------------|-----------------|----------------|------------------|----------------|------------------|------|------------------|-----------------|------------------|------------------|----------------|------------------|----|
| 1  | 136.0699         | 68.5386         |                |                  |                |                  | M    |                  |                 |                  |                  |                |                  | 17 |
| 2  | 235.1384         | 118.0728        |                |                  |                |                  | V    | 1786.0130        | 893.5102        | 1768.9865        | 884.9969         | 1768.0025      | 884.5049         | 16 |
| 3  | <b>348.2224</b>  | 174.6148        |                |                  |                |                  | I    | 1686.9446        | <b>843.9759</b> | 1669.9181        | 835.4627         | 1668.9341      | 834.9707         | 15 |
| 4  | 461.3065         | 231.1569        |                |                  |                |                  | I    | 1573.8606        | <b>787.4339</b> | 1556.8340        | 778.9206         | 1555.8500      | 778.4286         | 14 |
| 5  | <b>562.3542</b>  | 281.6807        |                |                  | 544.3436       | 272.6734         | T    | <b>1460.7765</b> | <b>730.8919</b> | <b>1443.7499</b> | 722.3786         | 1442.7659      | 721.8866         | 13 |
| 6  | <b>619.3756</b>  | 310.1915        |                |                  | 601.3651       | 301.1862         | G    | <b>1359.7288</b> | <b>680.3680</b> | 1342.7023        | 671.8548         | 1341.7182      | 671.3628         | 12 |
| 7  | 716.4284         | <b>358.7178</b> |                |                  | 698.4178       | 349.7126         | P    | <b>1302.7073</b> | <b>651.8573</b> | 1285.6808        | 643.3440         | 1284.6968      | 642.8520         | 11 |
| 8  | 813.4812         | 407.2442        |                |                  | 795.4706       | 398.2389         | P    | <b>1205.6546</b> | 603.3309        | 1188.6280        | 594.8177         | 1187.6440      | 594.3256         | 10 |
| 9  | <b>942.5238</b>  | 471.7655        |                |                  | 924.5132       | <b>462.7602</b>  | E    | 1108.6018        | 554.8045        | 1091.5753        | 546.2913         | 1090.5913      | 545.7993         | 9  |
| 10 | 1013.5609        | 507.2841        |                |                  | 995.5503       | 498.2788         | A    | <b>979.5592</b>  | 490.2833        | 962.5327         | 481.7700         |                |                  | 8  |
| 11 | 1141.6194        | 571.3134        | 1124.5929      | <b>562.8001</b>  | 1123.6089      | <b>562.3081</b>  | Q    | 908.5221         | 454.7647        | 891.4956         | 446.2514         |                |                  | 7  |
| 12 | 1288.6879        | <b>644.8476</b> | 1271.6613      | 636.3343         | 1270.6773      | 635.8423         | F    | <b>780.4635</b>  | 390.7354        | 763.4370         | 382.2221         |                |                  | 6  |
| 13 | <b>1490.8469</b> | 745.9271        | 1473.8203      | 737.4138         | 1472.8363      | 736.9218         | K    | <b>633.3951</b>  | 317.2012        | 616.3686         | 308.6879         |                |                  | 5  |
| 14 | 1561.8840        | 781.4456        | 1544.8574      | 772.9324         | 1543.8734      | 772.4403         | A    | <b>431.2361</b>  | 216.1217        | 414.2096         | 207.6084         |                |                  | 4  |
| 15 | 1689.9426        | 845.4749        | 1672.9160      | 836.9616         | 1671.9320      | 836.4696         | Q    | 360.1990         | 180.6031        | 343.1724         | 172.0899         |                |                  | 3  |
| 16 | 1746.9640        | 873.9857        | 1729.9375      | 865.4724         | 1728.9535      | 864.9804         | G    | 232.1404         | 116.5738        | 215.1139         | 108.0606         |                |                  | 2  |
| 17 |                  |                 |                |                  |                |                  | R    | 175.1190         | 88.0631         | 158.0924         | 79.5498          |                |                  | 1  |

Match to Query 7620: 1401.862528 from(701.938540,2+) intensity(35531.0391)

Title: File375 Spectrum10972 scans: 12594

Data file \\192.168.1.104\public\raw data\Elite\_01\methylation\_ZWk562\2013-5-15-562-Kpropio-methyl-IP-Fr4-ZW.mgf

Click mouse within plot area to zoom in by factor of two about that point

Or,  200  1500

Label all possible matches  Label matches used for scoring

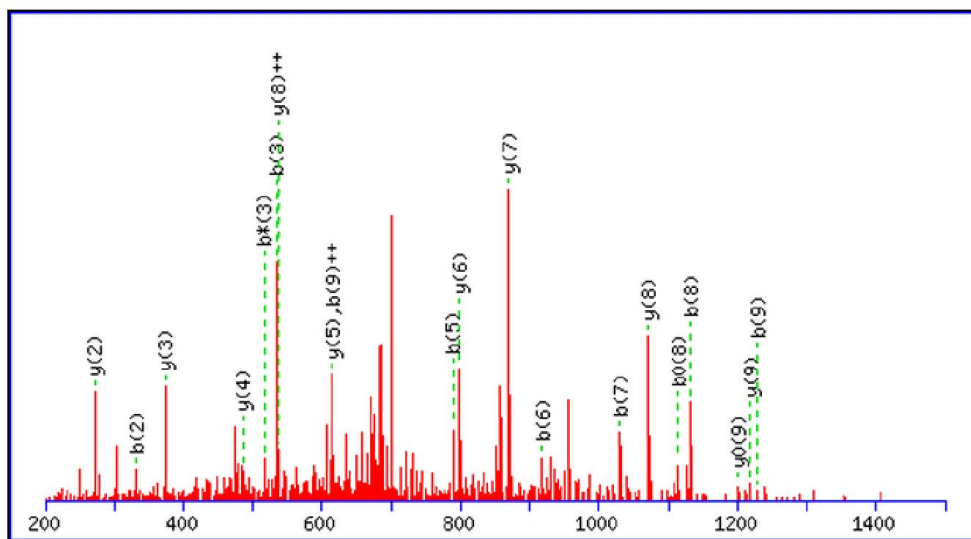

Monoisotopic mass of neutral peptide  $M_r(\text{calc})$ : 1401.8616

Fixed modifications: Carbamidomethyl (C) (apply to specified residues or termini only)

Variable modifications:

K1 : Propionyl (K)

K3 : Propionyl-(13CD3)Met]

K5 : Propionyl (K)

Ions Score: 36 Expect: 0.038

Matches : 20/90 fragment ions

| #  | b                | b <sup>++</sup> | b <sup>*</sup>  | b <sup>***</sup> | b <sup>0</sup>   | b <sup>0++</sup> | Seq. | y                | y <sup>++</sup> | y <sup>*</sup> | y <sup>***</sup> | y <sup>0</sup>   | y <sup>0++</sup> | #  |
|----|------------------|-----------------|-----------------|------------------|------------------|------------------|------|------------------|-----------------|----------------|------------------|------------------|------------------|----|
| 1  | 185.1285         | 93.0679         | 168.1019        | 84.5546          |                  |                  | K    |                  |                 |                |                  |                  |                  | 10 |
| 2  | <b>332.1969</b>  | 166.6021        | 315.1703        | 158.0888         |                  |                  | F    | <b>1218.7478</b> | 609.8775        | 1201.7212      | 601.3642         | <b>1200.7372</b> | 600.8722         | 9  |
| 3  | <b>534.3559</b>  | 267.6816        | <b>517.3293</b> | 259.1683         |                  |                  | K    | <b>1071.6793</b> | <b>536.3433</b> | 1054.6528      | 527.8300         | 1053.6688        | 527.3380         | 8  |
| 4  | 605.3930         | 303.2001        | 588.3664        | 294.6869         |                  |                  | A    | <b>869.5203</b>  | 435.2638        | 852.4938       | 426.7505         | 851.5098         | 426.2585         | 7  |
| 5  | <b>789.5142</b>  | 395.2607        | 772.4876        | 386.7475         |                  |                  | K    | <b>798.4832</b>  | 399.7452        | 781.4567       | 391.2320         | 780.4727         | 390.7400         | 6  |
| 6  | <b>917.5728</b>  | 459.2900        | 900.5462        | 450.7767         |                  |                  | Q    | <b>614.3620</b>  | 307.6847        | 597.3355       | 299.1714         | 596.3515         | 298.6794         | 5  |
| 7  | <b>1030.6568</b> | 515.8320        | 1013.6303       | 507.3188         |                  |                  | L    | <b>486.3035</b>  | 243.6554        | 469.2769       | 235.1421         | 468.2929         | 234.6501         | 4  |
| 8  | <b>1131.7045</b> | 566.3559        | 1114.6779       | 557.8426         | <b>1113.6939</b> | 557.3506         | T    | <b>373.2194</b>  | 187.1133        | 356.1928       | 178.6001         | 355.2088         | 178.1081         | 3  |
| 9  | <b>1228.7573</b> | <b>614.8823</b> | 1211.7307       | 606.3690         | 1210.7467        | 605.8770         | P    | <b>272.1717</b>  | 136.5895        | 255.1452       | 128.0762         |                  |                  | 2  |
| 10 |                  |                 |                 |                  |                  |                  | R    | 175.1190         | 88.0631         | 158.0924       | 79.5498          |                  |                  | 1  |

Found in **Q7Z5K2**, Wings apart-like protein homolog OS=Homo sapiens GN=WAPAL PE=1 SV=1

Match to Query 3109: 1061.650248 from(531.832400,2+) intensity(14045.9766)

Title: File375 Spectrum8977 scans: 10464

Data file \\192.168.1.104\public\raw data\Elite\_01\methylation\_ZW\k562\2013-5-15-562-Kpropio-methyl-IP-Fr4-ZW.mgf

Click mouse within plot area to zoom in by factor of two about that point

Or, Plot from  to  Da Label all possible matches  Label matches used for scoring 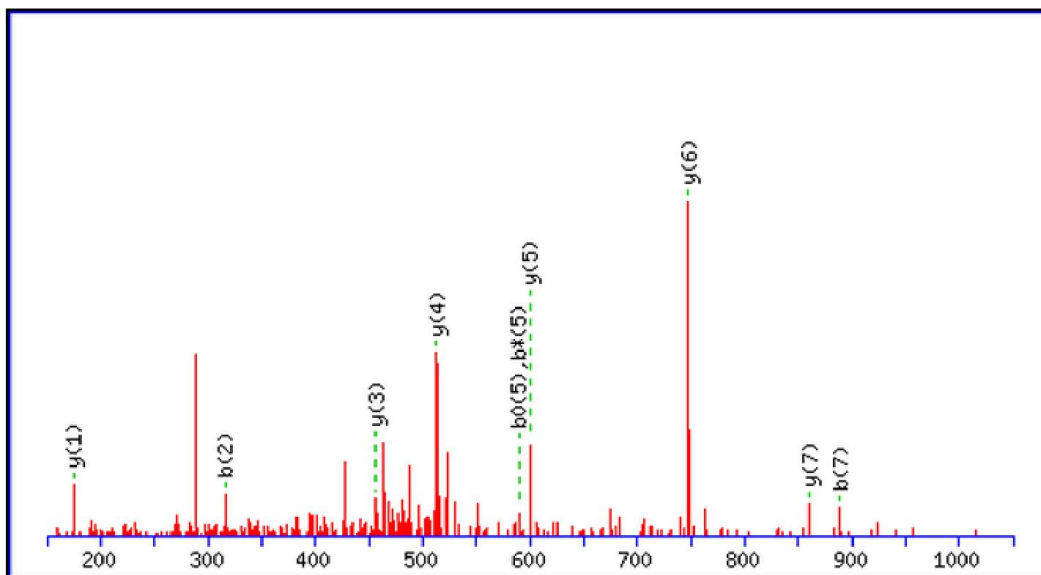

Monoisotopic mass of neutral peptide Mr(calc): 1061.6506

Fixed modifications: Carbamidomethyl (C) (apply to specified residues or termini only)

Variable modifications:

K1 : Propionyl-(13CD3)Me

K7 : Propionyl (K)

Ions Score: 40 Expect: 0.02

Matches : 10/70 fragment ions

| # | b               | b <sup>++</sup> | b <sup>*</sup>  | b <sup>*++</sup> | b <sup>0</sup>  | b <sup>0++</sup> | Seq. | y               | y <sup>++</sup> | y <sup>*</sup> | y <sup>*++</sup> | y <sup>0</sup> | y <sup>0++</sup> | # |
|---|-----------------|-----------------|-----------------|------------------|-----------------|------------------|------|-----------------|-----------------|----------------|------------------|----------------|------------------|---|
| 1 | 203.1663        | 102.0868        | 186.1397        | 93.5735          |                 |                  | K    |                 |                 |                |                  |                |                  | 8 |
| 2 | <b>316.2504</b> | 158.6288        | 299.2238        | 150.1155         |                 |                  | I    | <b>860.4989</b> | 430.7531        | 843.4723       | 422.2398         | 842.4883       | 421.7478         | 7 |
| 3 | 463.3188        | 232.1630        | 446.2922        | 223.6497         |                 |                  | F    | <b>747.4148</b> | 374.2110        | 730.3883       | 365.6978         | 729.4042       | 365.2058         | 6 |
| 4 | 550.3508        | 275.6790        | 533.3242        | 267.1658         | 532.3402        | 266.6738         | S    | <b>600.3464</b> | 300.6768        | 583.3198       | 292.1636         | 582.3358       | 291.6715         | 5 |
| 5 | 607.3723        | 304.1898        | <b>590.3457</b> | 295.6765         | <b>589.3617</b> | 295.1845         | G    | <b>513.3144</b> | 257.1608        | 496.2878       | 248.6475         |                |                  | 4 |
| 6 | 704.4250        | 352.7161        | 687.3985        | 344.2029         | 686.4145        | 343.7109         | P    | <b>456.2929</b> | 228.6501        | 439.2663       | 220.1368         |                |                  | 3 |
| 7 | <b>888.5462</b> | 444.7767        | 871.5197        | 436.2635         | 870.5356        | 435.7715         | K    | 359.2401        | 180.1237        | 342.2136       | 171.6104         |                |                  | 2 |
| 8 |                 |                 |                 |                  |                 |                  | R    | <b>175.1190</b> | 88.0631         | 158.0924       | 79.5498          |                |                  | 1 |

Found in **O15156**, Zinc finger and BTB domain-containing protein 7B OS=Homo sapiens GN=ZBTB7B PE=1 SV=2

Match to Query 5584: 1248.746428 from(625.380490,2+) intensity(36088.4766)

Title: File375 Spectrum10089 scans: 11652

Data file \\192.168.1.104\public\raw data\Elite\_01\methylation\_ZW\k562\2013-5-15-562-Kpropio-methyl-IP-Fr4-ZW.mgf

Click mouse within plot area to zoom in by factor of two about that point

Or, Plot from  to  Da Label all possible matches  Label matches used for scoring 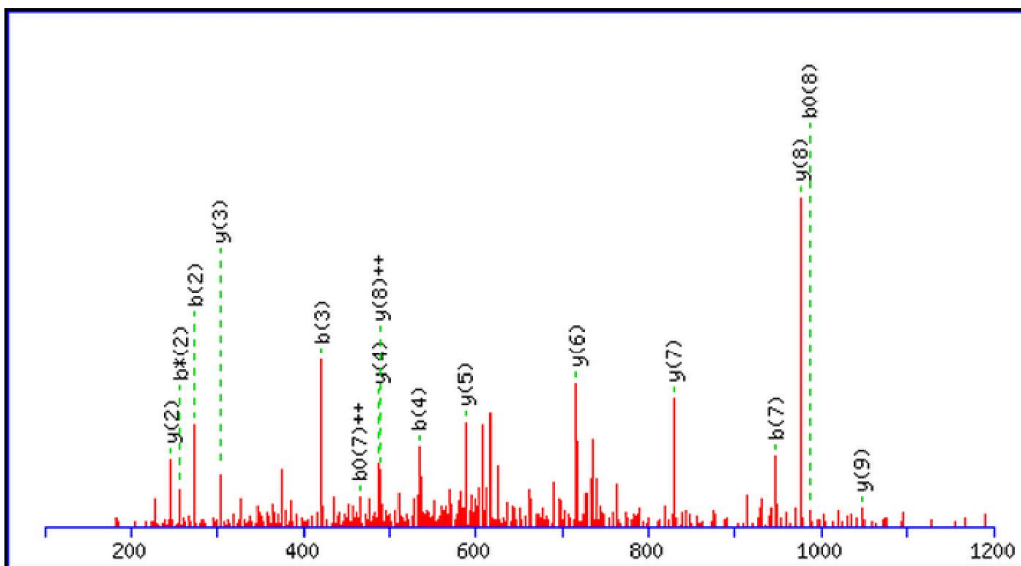

Monoisotopic mass of neutral peptide Mr(calc): 1248.7463

Fixed modifications: Carbamidomethyl (C) (apply to specified residues or termini only)

Variable modifications:

K1 : Propionyl-(13CD3)Methyl (K)

K7 : Propionyl (K)

Ions Score: 51 Expect: 0.0023

Matches : 16/90 fragment ions using :

| #  | b               | b <sup>++</sup> | b <sup>*</sup>  | b <sup>*++</sup> | b <sup>0</sup>  | b <sup>0++</sup> | Seq. | y                | y <sup>++</sup> | y <sup>*</sup> | y <sup>*++</sup> | y <sup>0</sup> | y <sup>0++</sup> | #  |
|----|-----------------|-----------------|-----------------|------------------|-----------------|------------------|------|------------------|-----------------|----------------|------------------|----------------|------------------|----|
| 1  | 203.1663        | 102.0868        | 186.1397        | 93.5735          |                 |                  | K    |                  |                 |                |                  |                |                  | 10 |
| 2  | <b>274.2034</b> | 137.6053        | <b>257.1769</b> | 129.0921         |                 |                  | A    | <b>1047.5946</b> | 524.3009        | 1030.5680      | 515.7876         | 1029.5840      | 515.2956         | 9  |
| 3  | <b>421.2718</b> | 211.1395        | 404.2453        | 202.6263         |                 |                  | F    | <b>976.5574</b>  | <b>488.7824</b> | 959.5309       | 480.2691         | 958.5469       | 479.7771         | 8  |
| 4  | <b>534.3559</b> | 267.6816        | 517.3293        | 259.1683         |                 |                  | L    | <b>829.4890</b>  | 415.2482        | 812.4625       | 406.7349         | 811.4785       | 406.2429         | 7  |
| 5  | 662.4145        | 331.7109        | 645.3879        | 323.1976         |                 |                  | Q    | <b>716.4050</b>  | 358.7061        | 699.3784       | 350.1928         | 698.3944       | 349.7008         | 6  |
| 6  | 763.4621        | 382.2347        | 746.4356        | 373.7214         | 745.4516        | 373.2294         | T    | <b>588.3464</b>  | 294.6768        | 571.3198       | 286.1636         | 570.3358       | 285.6715         | 5  |
| 7  | <b>947.5833</b> | 474.2953        | 930.5568        | 465.7820         | 929.5728        | <b>465.2900</b>  | K    | <b>487.2987</b>  | 244.1530        | 470.2722       | 235.6397         |                |                  | 4  |
| 8  | 1004.6048       | 502.8060        | 987.5782        | 494.2928         | <b>986.5942</b> | 493.8007         | G    | <b>303.1775</b>  | 152.0924        | 286.1510       | 143.5791         |                |                  | 3  |
| 9  | 1075.6419       | 538.3246        | 1058.6153       | 529.8113         | 1057.6313       | 529.3193         | A    | <b>246.1561</b>  | 123.5817        | 229.1295       | 115.0684         |                |                  | 2  |
| 10 |                 |                 |                 |                  |                 |                  | R    | 175.1190         | 88.0631         | 158.0924       | 79.5498          |                |                  | 1  |



Found in **P08670**, Vimentin OS=Homo sapiens GN=VIM PE=1 SV=4

Match to Query 5689: 1246.775728 from(624.395140,2+) intensity(33411.3242)

Title: File373 Spectrum13349 scans: 14945

Data file \\192.168.1.104\public\raw data\Elite\_01\methylation\_ZW\k562\2013-5-15-562-Kpropio-methyl-IP-Fr3-ZW.mgf

Click mouse within plot area to zoom in by factor of two about that point

Or, Plot from  to  Da Label all possible matches  Label matches used for scoring 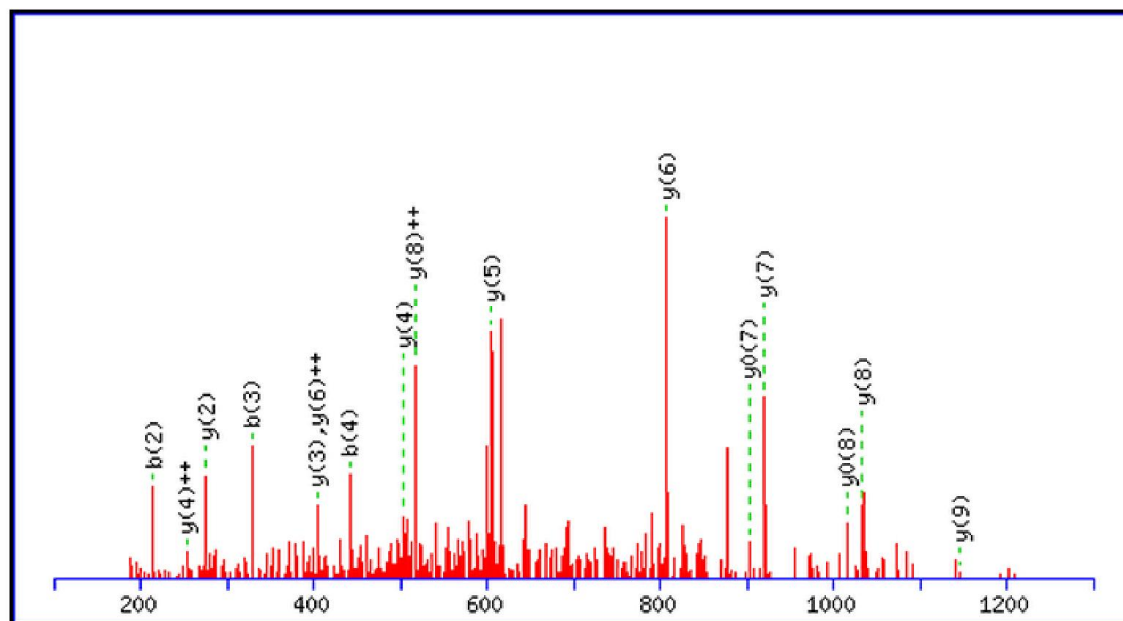

Monoisotopic mass of neutral peptide  
 Fixed modifications: Carbamidomethyl  
 Variable modifications:  
 K5 : Propionyl-(13CD3)Methyl (K)  
 Ions Score: 50 Expect: 0.0016  
 Matches : 16/98 fragment ions using

| #  | b               | b <sup>++</sup> | b <sup>*</sup> | b <sup>*++</sup> | b <sup>0</sup> | b <sup>0++</sup> | Seq. | y                | y <sup>++</sup> | y <sup>*</sup> | y <sup>*++</sup> | y <sup>0</sup>   | y <sup>0++</sup> | #  |
|----|-----------------|-----------------|----------------|------------------|----------------|------------------|------|------------------|-----------------|----------------|------------------|------------------|------------------|----|
| 1  | 102.0550        | 51.5311         |                |                  | 84.0444        | 42.5258          | T    |                  |                 |                |                  |                  |                  | 10 |
| 2  | <b>215.1390</b> | 108.0731        |                |                  | 197.1285       | 99.0679          | L    | <b>1146.7365</b> | 573.8719        | 1129.7100      | 565.3586         | 1128.7260        | 564.8666         | 9  |
| 3  | <b>328.2231</b> | 164.6152        |                |                  | 310.2125       | 155.6099         | L    | <b>1033.6525</b> | <b>517.3299</b> | 1016.6259      | 508.8166         | <b>1015.6419</b> | 508.3246         | 8  |
| 4  | <b>441.3071</b> | 221.1572        |                |                  | 423.2966       | 212.1519         | I    | <b>920.5684</b>  | 460.7878        | 903.5418       | 452.2746         | <b>902.5578</b>  | 451.7826         | 7  |
| 5  | 643.4662        | 322.2367        | 626.4396       | 313.7234         | 625.4556       | 313.2314         | K    | <b>807.4843</b>  | <b>404.2458</b> | 790.4578       | 395.7325         | 789.4738         | 395.2405         | 6  |
| 6  | 744.5138        | 372.7606        | 727.4873       | 364.2473         | 726.5033       | 363.7553         | T    | <b>605.3253</b>  | 303.1663        | 588.2988       | 294.6530         | 587.3148         | 294.1610         | 5  |
| 7  | 843.5823        | 422.2948        | 826.5557       | 413.7815         | 825.5717       | 413.2895         | V    | <b>504.2776</b>  | <b>252.6425</b> | 487.2511       | 244.1292         | 486.2671         | 243.6372         | 4  |
| 8  | 972.6248        | 486.8161        | 955.5983       | 478.3028         | 954.6143       | 477.8108         | E    | <b>405.2092</b>  | 203.1082        | 388.1827       | 194.5950         | 387.1987         | 194.1030         | 3  |
| 9  | 1073.6725       | 537.3399        | 1056.6460      | 528.8266         | 1055.6620      | 528.3346         | T    | <b>276.1666</b>  | 138.5870        | 259.1401       | 130.0737         | 258.1561         | 129.5817         | 2  |
| 10 |                 |                 |                |                  |                |                  | R    | 175.1190         | 88.0631         | 158.0924       | 79.5498          |                  |                  | 1  |

Found in **I3L080**, Hepatoma-derived growth factor-related protein 2 OS=Homo sapiens GN=HDGFRP2 PE=2 SV=1

Match to Query 10032: 1534.930888 from(768.472720,2+) intensity(45496.5938)

Title: File373 Spectrum12189 scans: 13708

Data file \\192.168.1.104\public\raw data\Elite\_01\methylation\_ZW\k562\2013-5-15-562-Kpropio-methyl-IP-Fr3-ZW.mgf

Click mouse within plot area to zoom in by factor of two about that point

Or, Plot from  to  Da Label all possible matches  Label matches used for scoring 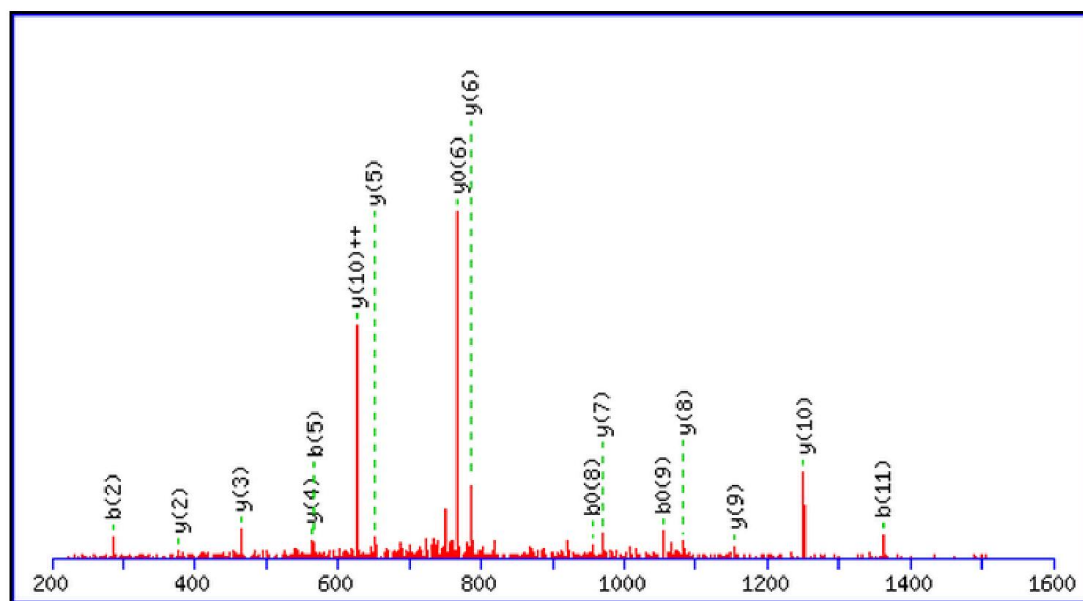

Monoisotopic mass of neutral peptide Mr(ca.

Fixed modifications: Carbamidomethyl (C) (

Variable modifications:

K1 : Propionyl (K)

K6 : Propionyl (K)

M7 : Label:13C(1)2H(3) (M)

K11 : Propionyl-(13CD3)Methyl (K)

Ions Score: 65 Expect: 6e-005

Matches : 16/126 fragment ions using 26 mo.

| #  | b                | b <sup>++</sup> | b*        | b <sup>+++</sup> | b <sup>0</sup>   | b <sup>0++</sup> | Seq. | y                | y <sup>++</sup> | y*        | y <sup>+++</sup> | y <sup>0</sup>  | y <sup>0++</sup> | #  |
|----|------------------|-----------------|-----------|------------------|------------------|------------------|------|------------------|-----------------|-----------|------------------|-----------------|------------------|----|
| 1  | 185.1285         | 93.0679         | 168.1019  | 84.5546          |                  |                  | K    |                  |                 |           |                  |                 |                  | 12 |
| 2  | <b>286.1761</b>  | 143.5917        | 269.1496  | 135.0784         | 268.1656         | 134.5864         | T    | 1351.8159        | 676.4116        | 1334.7894 | 667.8983         | 1333.8053       | 667.4063         | 11 |
| 3  | 383.2289         | 192.1181        | 366.2023  | 183.6048         | 365.2183         | 183.1128         | P    | <b>1250.7682</b> | <b>625.8878</b> | 1233.7417 | 617.3745         | 1232.7577       | 616.8825         | 10 |
| 4  | 454.2660         | 227.6366        | 437.2395  | 219.1234         | 436.2554         | 218.6314         | A    | <b>1153.7155</b> | 577.3614        | 1136.6889 | 568.8481         | 1135.7049       | 568.3561         | 9  |
| 5  | <b>567.3501</b>  | 284.1787        | 550.3235  | 275.6654         | 549.3395         | 275.1734         | L    | <b>1082.6783</b> | 541.8428        | 1065.6518 | 533.3295         | 1064.6678       | 532.8375         | 8  |
| 6  | 751.4713         | 376.2393        | 734.4447  | 367.7260         | 733.4607         | 367.2340         | K    | <b>969.5943</b>  | 485.3008        | 952.5677  | 476.7875         | 951.5837        | 476.2955         | 7  |
| 7  | 886.5339         | 443.7706        | 869.5074  | 435.2573         | 868.5234         | 434.7653         | M    | <b>785.4731</b>  | 393.2402        | 768.4466  | 384.7269         | <b>767.4625</b> | 384.2349         | 6  |
| 8  | 973.5660         | 487.2866        | 956.5394  | 478.7733         | <b>955.5554</b>  | 478.2813         | S    | <b>650.4104</b>  | 325.7089        | 633.3839  | 317.1956         | 632.3999        | 316.7036         | 5  |
| 9  | 1072.6344        | 536.8208        | 1055.6078 | 528.3075         | <b>1054.6238</b> | 527.8155         | V    | <b>563.3784</b>  | 282.1928        | 546.3519  | 273.6796         | 545.3678        | 273.1876         | 4  |
| 10 | 1159.6664        | 580.3368        | 1142.6398 | 571.8236         | 1141.6558        | 571.3316         | S    | <b>464.3100</b>  | 232.6586        | 447.2834  | 224.1454         | 446.2994        | 223.6534         | 3  |
| 11 | <b>1361.8254</b> | 681.4163        | 1344.7989 | 672.9031         | 1343.8148        | 672.4111         | K    | <b>377.2780</b>  | 189.1426        | 360.2514  | 180.6293         |                 |                  | 2  |
| 12 |                  |                 |           |                  |                  |                  | R    | 175.1190         | 88.0631         | 158.0924  | 79.5498          |                 |                  | 1  |

Found in **A0JNWS**, UHRF1-binding protein 1-like OS=Homo sapiens GN=UHRF1BP1L PE=1 SV=2

Match to Query 18: 704.445048 from(353.229800,2+) intensity(8895.4434)

Title: File373 Spectrum2309 scans: 3078

Data file \\192.168.1.104\public\raw data\Elite\_01\methylation\_ZW\k562\2013-5-15-562-Kpropio-methyl-IP-Fr3-ZW.mgf

Click mouse within plot area to zoom in by factor of two about that point

Or,   to  Da Label all possible matches  Label matches used for scoring 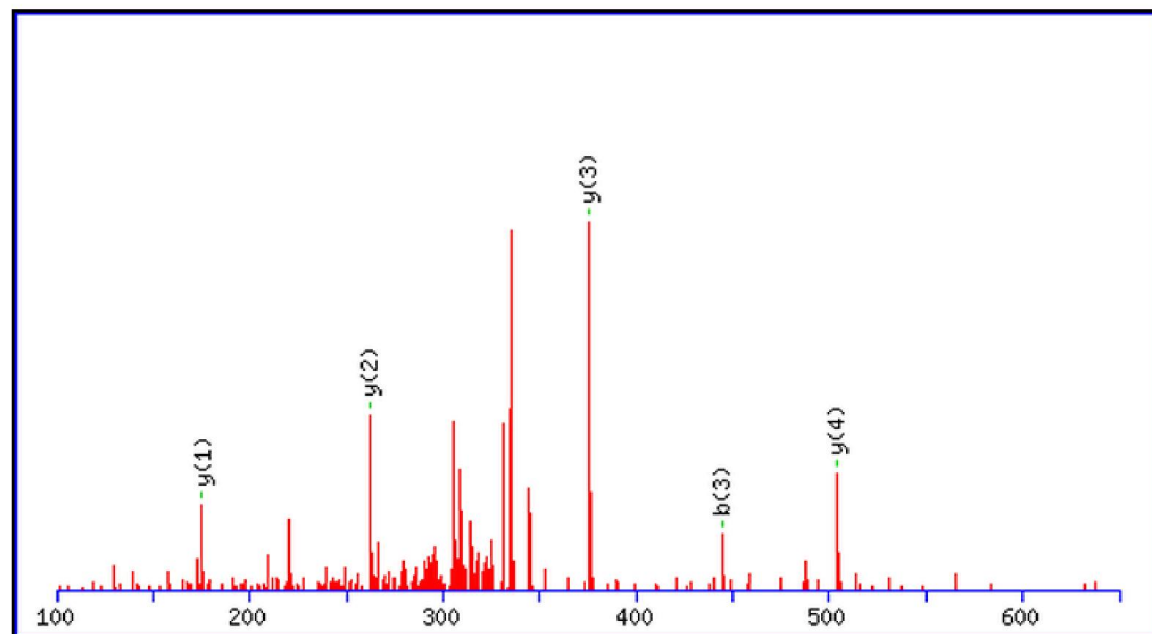

Monoisotopic mass of neutral peptide Mr(calc): 704.4453

Fixed modifications: Carbamidomethyl (C) (apply to specified residues or termini only)

Variable modifications:

K1 : Propionyl-(13CD3)Met

Ions Score: 30 Expect: 0.26

Matches : 5/40 fragment ions

| # | b               | b <sup>++</sup> | b <sup>*</sup> | b <sup>*++</sup> | b <sup>0</sup> | b <sup>0++</sup> | Seq. | y               | y <sup>++</sup> | y <sup>*</sup> | y <sup>*++</sup> | y <sup>0</sup> | y <sup>0++</sup> | # |
|---|-----------------|-----------------|----------------|------------------|----------------|------------------|------|-----------------|-----------------|----------------|------------------|----------------|------------------|---|
| 1 | 203.1663        | 102.0868        | 186.1397       | 93.5735          |                |                  | K    |                 |                 |                |                  |                |                  | 5 |
| 2 | 331.2249        | 166.1161        | 314.1983       | 157.6028         |                |                  | Q    | <b>503.2936</b> | 252.1504        | 486.2671       | 243.6372         | 485.2831       | 243.1452         | 4 |
| 3 | <b>444.3089</b> | 222.6581        | 427.2824       | 214.1448         |                |                  | I    | <b>375.2350</b> | 188.1212        | 358.2085       | 179.6079         | 357.2245       | 179.1159         | 3 |
| 4 | 531.3410        | 266.1741        | 514.3144       | 257.6608         | 513.3304       | 257.1688         | S    | <b>262.1510</b> | 131.5791        | 245.1244       | 123.0659         | 244.1404       | 122.5738         | 2 |
| 5 |                 |                 |                |                  |                |                  | R    | <b>175.1190</b> | 88.0631         | 158.0924       | 79.5498          |                |                  | 1 |

Found in **Q8IUVV8**, E3 ubiquitin-protein ligase UBR2 OS=Homo sapiens GN=UBR2 PE=1 SV=1

Match to Query 211: 760.471968 from(381.243260,2+) intensity(12606.0537)

Title: File373 Spectrum3382 scans: 4234

Data file \\192.168.1.104\public\raw data\Elite\_01\methylation\_ZWk562\2013-5-15-562-Kpropio-methyl-IP-Fr3-ZW.mgf

Click mouse within plot area to zoom in by factor of two about that point

Or,   to  Da Label all possible matches  Label matches used for scoring 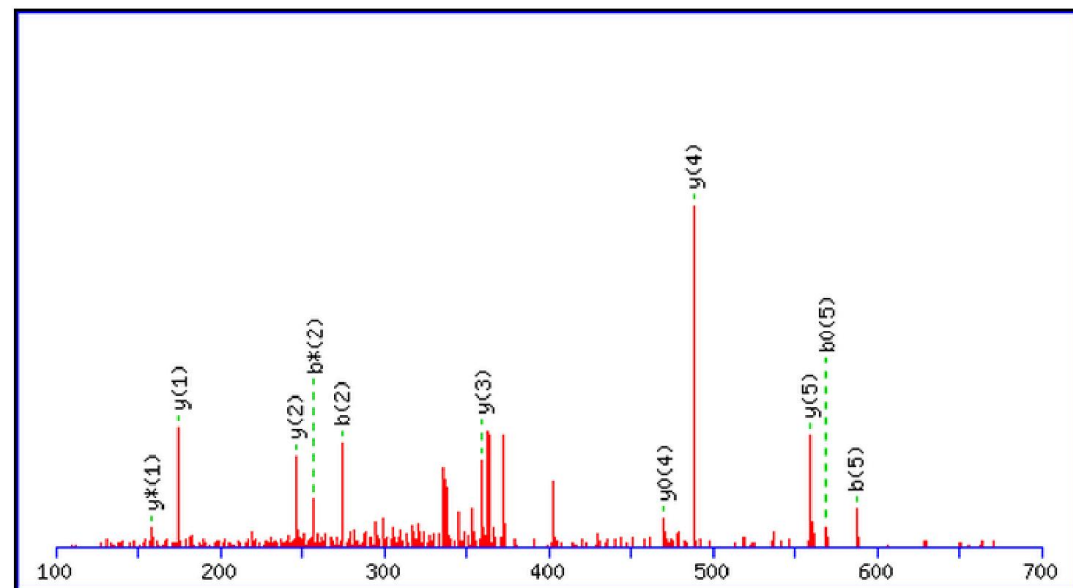

Monoisotopic mass of neutral peptide Mr(calc): 760.4715

Fixed modifications: Carbamidomethyl (C) (apply to specified residues or termini only)

Variable modifications:

K1 : Propionyl

Ions Score: 34 Ex

Matches : 11/50 fr

| # | b               | b <sup>++</sup> | b <sup>*</sup>  | b <sup>*++</sup> | b <sup>0</sup>  | b <sup>0++</sup> | Seq. | y               | y <sup>++</sup> | y <sup>*</sup>  | y <sup>*++</sup> | y <sup>0</sup>  | y <sup>0++</sup> | # |
|---|-----------------|-----------------|-----------------|------------------|-----------------|------------------|------|-----------------|-----------------|-----------------|------------------|-----------------|------------------|---|
| 1 | 203.1663        | 102.0868        | 186.1397        | 93.5735          |                 |                  | K    |                 |                 |                 |                  |                 |                  | 6 |
| 2 | <b>274.2034</b> | 137.6053        | <b>257.1769</b> | 129.0921         |                 |                  | A    | <b>559.3198</b> | 280.1636        | 542.2933        | 271.6503         | 541.3093        | 271.1583         | 5 |
| 3 | 403.2460        | 202.1266        | 386.2194        | 193.6134         | 385.2354        | 193.1214         | E    | <b>488.2827</b> | 244.6450        | 471.2562        | 236.1317         | <b>470.2722</b> | 235.6397         | 4 |
| 4 | 516.3301        | 258.6687        | 499.3035        | 250.1554         | 498.3195        | 249.6634         | I    | <b>359.2401</b> | 180.1237        | 342.2136        | 171.6104         |                 |                  | 3 |
| 5 | <b>587.3672</b> | 294.1872        | 570.3406        | 285.6740         | <b>569.3566</b> | 285.1819         | A    | <b>246.1561</b> | 123.5817        | 229.1295        | 115.0684         |                 |                  | 2 |
| 6 |                 |                 |                 |                  |                 |                  | R    | <b>175.1190</b> | 88.0631         | <b>158.0924</b> | 79.5498          |                 |                  | 1 |

Match to Query 586: 818.487528 from(410.251040,2+) intensity(42031.4531)

Title: File373 Spectrum3261 scans: 4105

Data file \\192.168.1.104\public\raw data\Elite\_01\methylation\_ZW\k562\2013-5-15-562-Kpropio-methyl-IP-Fr3-ZW.mgf

Click mouse within plot area to zoom in by factor of two about that point

Or,   to  Da

Label all possible matches  Label matches used for scoring

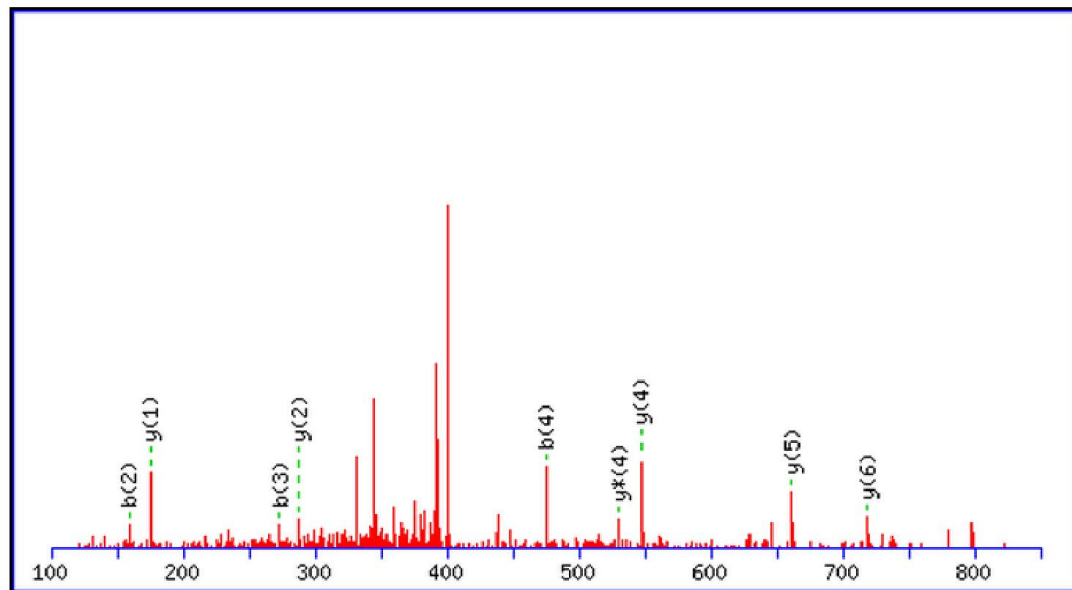

Monoisotopic mass of neutral peptide Mr(calc): 818.4883

Fixed modifications: Carbamido

Variable modifications:

K4 : Propionyl-(13CD3)Meth

Ions Score: 38 Expect: 0.039

Matches : 9/56 fragment ions u

| # | b               | b <sup>++</sup> | b*       | b <sup>*++</sup> | b <sup>0</sup> | b <sup>0++</sup> | Seq. | y               | y <sup>++</sup> | y*              | y <sup>*++</sup> | # |
|---|-----------------|-----------------|----------|------------------|----------------|------------------|------|-----------------|-----------------|-----------------|------------------|---|
| 1 | 102.0550        | 51.5311         |          |                  | 84.0444        | 42.5258          | T    |                 |                 |                 |                  | 7 |
| 2 | <b>159.0764</b> | 80.0418         |          |                  | 141.0659       | 71.0366          | G    | <b>718.4479</b> | 359.7276        | 701.4213        | 351.2143         | 6 |
| 3 | <b>273.1193</b> | 137.0633        | 256.0928 | 128.5500         | 255.1088       | 128.0580         | N    | <b>661.4264</b> | 331.2168        | 644.3999        | 322.7036         | 5 |
| 4 | <b>475.2784</b> | 238.1428        | 458.2518 | 229.6295         | 457.2678       | 229.1375         | K    | <b>547.3835</b> | 274.1954        | <b>530.3569</b> | 265.6821         | 4 |
| 5 | 532.2998        | 266.6535        | 515.2733 | 258.1403         | 514.2893       | 257.6483         | G    | 345.2245        | 173.1159        | 328.1979        | 164.6026         | 3 |
| 6 | 645.3839        | 323.1956        | 628.3573 | 314.6823         | 627.3733       | 314.1903         | L    | <b>288.2030</b> | 144.6051        | 271.1765        | 136.0919         | 2 |
| 7 |                 |                 |          |                  |                |                  | R    | <b>175.1190</b> | 88.0631         | 158.0924        | 79.5498          | 1 |

Found in **Q12972**, Nuclear inhibitor of protein phosphatase 1 OS=Homo sapiens GN=PPP1R8 PE=1 SV=2

Match to Query 13778: 1787.090068 from(894.552310,2+) intensity(25304.2461)

Title: File276 Spectrum12603 scans: 14135

Data file \\192.168.1.104\public\raw data\Elite\_01\methylation\_ZW\k562\2013-5-15-562-Kpropio-methyl-IP-Fr2-ZW.mgf

Click mouse within plot area to zoom in by factor of two about that point

Or,  300 to 1800 Da Label all possible matches  Label matches used for scoring 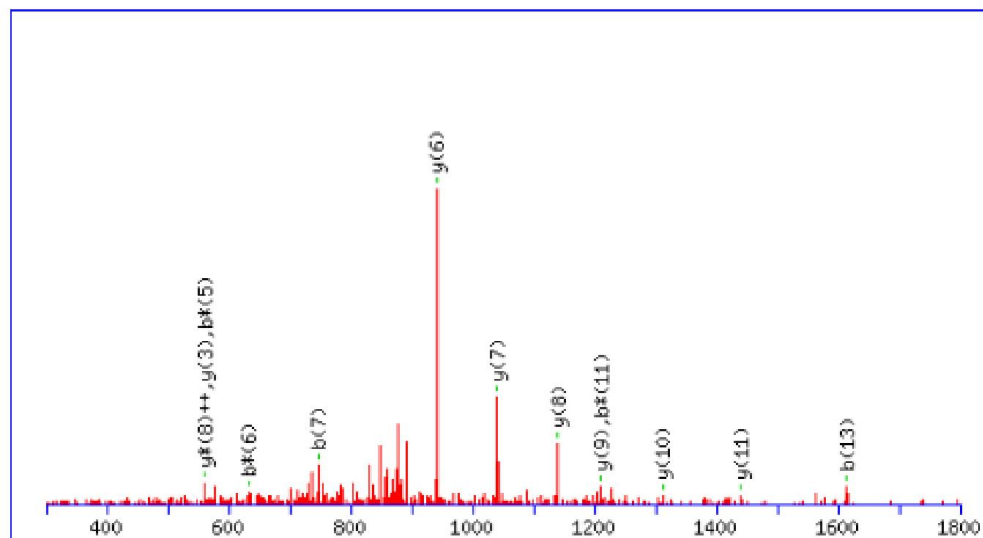

Monoisotopic mass of neutral peptide Mr(calc): 1787.0884

Fixed modifications: Carbamidomethyl (C) (apply to specified residues or termini only)

Variable modifications:

M2 : Label:13C(1)2H(3) (M)

K11 : Propionyl (K)

K12 : Propionyl (K)

K13 : Propionyl-(13CD3)Methyl (K)

Ions Score: 49 Expect: 0.0017

Matches : 13/130 fragment ions using 15 most intense peaks ([help](#))

| #  | b                | b <sup>++</sup> | b <sup>+</sup>   | b <sup>+++</sup> | b <sup>0</sup> | b <sup>0++</sup> | Seq. | y                | y <sup>++</sup> | y <sup>+</sup> | y <sup>+++</sup> | y <sup>0</sup> | y <sup>0++</sup> | #  |
|----|------------------|-----------------|------------------|------------------|----------------|------------------|------|------------------|-----------------|----------------|------------------|----------------|------------------|----|
| 1  | 115.0502         | 58.0287         | 98.0237          | 49.5155          |                |                  | N    |                  |                 |                |                  |                |                  | 14 |
| 2  | 250.1129         | 125.5601        | 233.0863         | 117.0468         |                |                  | M    | 1674.0528        | 837.5300        | 1657.0262      | 829.0168         | 1656.0422      | 828.5247         | 13 |
| 3  | 349.1813         | 175.0943        | 332.1547         | 166.5810         |                |                  | V    | 1538.9901        | 769.9987        | 1521.9636      | 761.4854         | 1520.9795      | 760.9934         | 12 |
| 4  | 477.2399         | 239.1236        | 460.2133         | 230.6103         |                |                  | Q    | <b>1439.9217</b> | 720.4645        | 1422.8951      | 711.9512         | 1421.9111      | 711.4592         | 11 |
| 5  | 578.2875         | 289.6474        | <b>561.2610</b>  | 281.1341         | 560.2770       | 280.6421         | T    | <b>1311.8631</b> | 656.4352        | 1294.8366      | 647.9219         | 1293.8526      | 647.4299         | 10 |
| 6  | 649.3247         | 325.1660        | <b>632.2981</b>  | 316.6527         | 631.3141       | 316.1607         | A    | <b>1210.8154</b> | 605.9114        | 1193.7889      | 597.3981         |                |                  | 9  |
| 7  | <b>748.3931</b>  | 374.7002        | 731.3665         | 366.1869         | 730.3825       | 365.6949         | V    | <b>1139.7783</b> | 570.3928        | 1122.7518      | <b>561.8795</b>  |                |                  | 8  |
| 8  | 847.4615         | 424.2344        | 830.4349         | 415.7211         | 829.4509       | 415.2291         | V    | <b>1040.7099</b> | 520.8586        | 1023.6834      | 512.3453         |                |                  | 7  |
| 9  | 944.5142         | 472.7608        | 927.4877         | 464.2475         | 926.5037       | 463.7555         | P    | <b>941.6415</b>  | 471.3244        | 924.6150       | 462.8111         |                |                  | 6  |
| 10 | 1043.5827        | 522.2950        | 1026.5561        | 513.7817         | 1025.5721      | 513.2897         | V    | 844.5887         | 422.7980        | 827.5622       | 414.2847         |                |                  | 5  |
| 11 | 1227.7038        | 614.3556        | <b>1210.6773</b> | 605.8423         | 1209.6933      | 605.3503         | K    | 745.5203         | 373.2638        | 728.4938       | 364.7505         |                |                  | 4  |
| 12 | 1411.8250        | 706.4161        | 1394.7985        | 697.9029         | 1393.8145      | 697.4109         | K    | <b>561.3991</b>  | 281.2032        | 544.3726       | 272.6899         |                |                  | 3  |
| 13 | <b>1613.9840</b> | 807.4957        | 1596.9575        | 798.9824         | 1595.9735      | 798.4904         | K    | 377.2780         | 189.1426        | 360.2514       | 180.6293         |                |                  | 2  |
| 14 |                  |                 |                  |                  |                |                  | R    | 175.1190         | 88.0631         | 158.0924       | 79.5498          |                |                  | 1  |

Match to Query 6108: 1215.728248 from(608.871400,2+) intensity(102705.3516)

Title: File276 Spectrum11504 scans: 12963

Data file \\192.168.1.104\public\raw data\Elite\_01\methylation\_ZW\k562\2013-5-15-562-Kpropio-methyl-IP-Fr2-ZW.mgf

Click mouse within plot area to zoom in by factor of two about that point

Or,  150 to 1200 Da

Label all possible matches  Label matches used for scoring

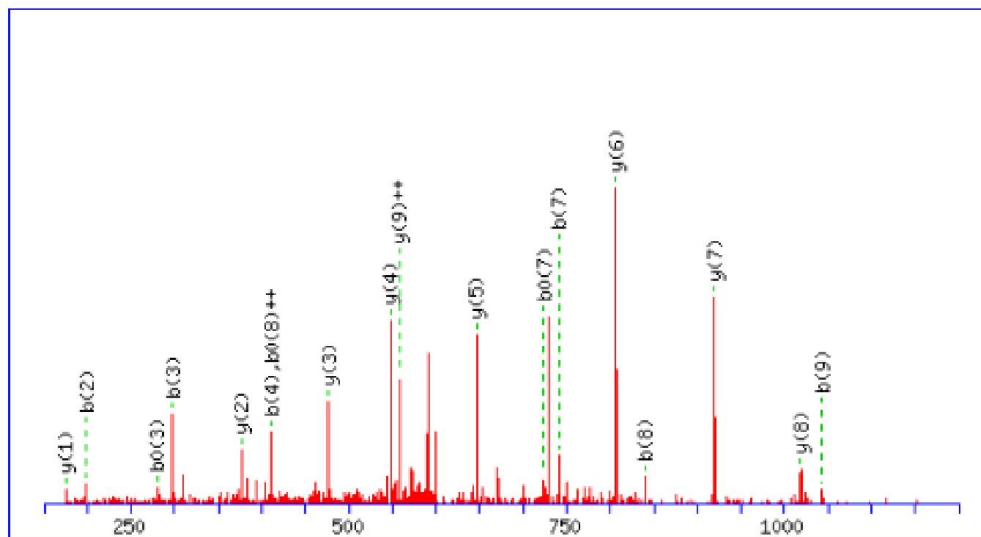

Monoisotopic mass of neutral peptide Mr(calc): 1215.7282

Fixed modifications: Carbamidomethyl (C) (apply to specified residues or termini only)

Variable modifications:

K9 : Propionyl-(13CD3)Methyl (K)

Ions Score: 57 Expect: 0.00055

Matches : 18/74 fragment ions using 30 most intense peaks [\(help\)](#)

| #  | b                | b <sup>++</sup> | b <sup>+</sup> | b <sup>+++</sup> | b <sup>0</sup>  | b <sup>0++</sup> | Seq. | y                | y <sup>++</sup> | y <sup>+</sup> | y <sup>+++</sup> | #  |
|----|------------------|-----------------|----------------|------------------|-----------------|------------------|------|------------------|-----------------|----------------|------------------|----|
| 1  | 102.0550         | 51.5311         |                |                  | 84.0444         | 42.5258          | T    |                  |                 |                |                  | 10 |
| 2  | <b>199.1077</b>  | 100.0575        |                |                  | 181.0972        | 91.0522          | P    | 1115.6878        | <b>558.3475</b> | 1098.6612      | 549.8343         | 9  |
| 3  | <b>298.1761</b>  | 149.5917        |                |                  | <b>280.1656</b> | 140.5864         | V    | <b>1018.6350</b> | 509.8212        | 1001.6085      | 501.3079         | 8  |
| 4  | <b>411.2602</b>  | 206.1337        |                |                  | 393.2496        | 197.1285         | L    | <b>919.5666</b>  | 460.2869        | 902.5401       | 451.7737         | 7  |
| 5  | 571.2908         | 286.1491        |                |                  | 553.2803        | 277.1438         | C    | <b>806.4826</b>  | 403.7449        | 789.4560       | 395.2316         | 6  |
| 6  | 670.3593         | 335.6833        |                |                  | 652.3487        | 326.6780         | V    | <b>646.4519</b>  | 323.7296        | 629.4254       | 315.2163         | 5  |
| 7  | <b>741.3964</b>  | 371.2018        |                |                  | <b>723.3858</b> | 362.1965         | A    | <b>547.3835</b>  | 274.1954        | 530.3569       | 265.6821         | 4  |
| 8  | <b>840.4648</b>  | 420.7360        |                |                  | 822.4542        | <b>411.7307</b>  | V    | <b>476.3464</b>  | 238.6768        | 459.3198       | 230.1636         | 3  |
| 9  | <b>1042.6238</b> | 521.8155        | 1025.5973      | 513.3023         | 1024.6132       | 512.8103         | K    | <b>377.2780</b>  | 189.1426        | 360.2514       | 180.6293         | 2  |
| 10 |                  |                 |                |                  |                 |                  | R    | <b>175.1190</b>  | 88.0631         | 158.0924       | 79.5498          | 1  |

Found in **Q03701**, CCAAT/enhancer-binding protein zeta OS=Homo sapiens GN=CEBPZ PE=1 SV=3

Match to Query 3442: 1185.714328 from(593.864440,2+) intensity(25360.4883)

Title: File365 Spectrum9386 scan#: 10900

Data file \\192.168.1.104\public\raw data\Elite\_01\methylation\_ZW\k562\2013-6-3-K562-Kpropio-methyl-IP-Fr20-ZW.mgf

Click mouse within plot area to zoom in by factor of two about that point

Or,  100 to 1200 Da Label all possible matches  Label matches used for scoring 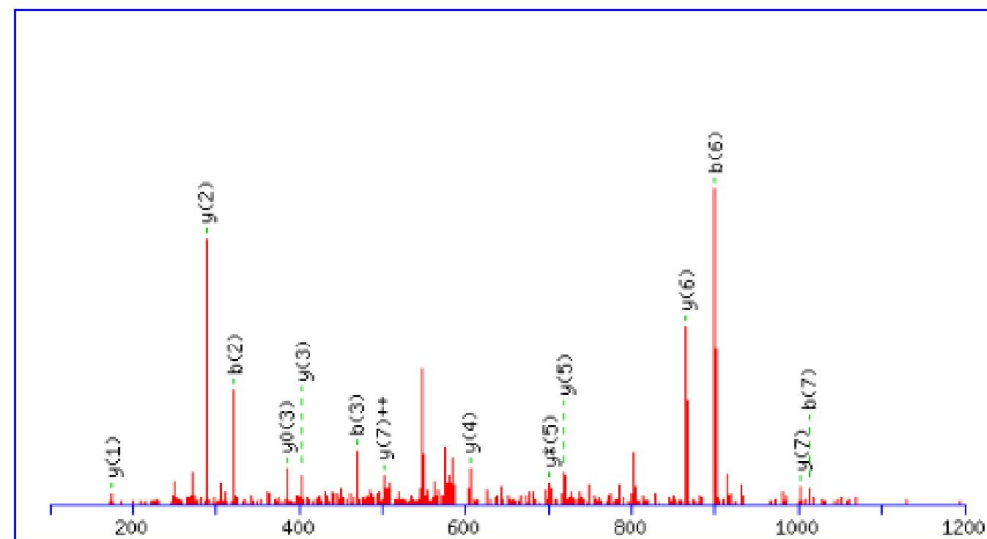

Monoisotopic mass of neutral peptide Mr(calc): 1185.7142

Fixed modifications: Carbamidomethyl (C) (apply to specified residues or termini only)

Variable modifications:

K1 : Propionyl (K)

K5 : Propionyl-(13CD3)Methyl (K)

Ions Score: 43 Expect: 0.013

Matches : 14/70 fragment ions using 28 most intense peaks ([help](#))

| # | b                | b <sup>++</sup> | b <sup>+</sup> | b <sup>+++</sup> | b <sup>0</sup> | b <sup>0++</sup> | Seq. | y                | y <sup>++</sup> | y <sup>+</sup>  | y <sup>+++</sup> | y <sup>0</sup>  | y <sup>0++</sup> | # |
|---|------------------|-----------------|----------------|------------------|----------------|------------------|------|------------------|-----------------|-----------------|------------------|-----------------|------------------|---|
| 1 | 185.1285         | 93.0679         | 168.1019       | 84.5546          |                |                  | K    |                  |                 |                 |                  |                 |                  | 8 |
| 2 | <b>322.1874</b>  | 161.5973        | 305.1608       | 153.0840         |                |                  | H    | <b>1002.6004</b> | <b>501.8038</b> | 985.5738        | 493.2905         | 984.5898        | 492.7985         | 7 |
| 3 | <b>469.2558</b>  | 235.1315        | 452.2292       | 226.6183         |                |                  | F    | <b>865.5414</b>  | 433.2744        | 848.5149        | 424.7611         | 847.5309        | 424.2691         | 6 |
| 4 | 582.3398         | 291.6736        | 565.3133       | 283.1603         |                |                  | I    | <b>718.4730</b>  | 359.7402        | <b>701.4465</b> | 351.2269         | 700.4625        | 350.7349         | 5 |
| 5 | 784.4989         | 392.7531        | 767.4723       | 384.2398         |                |                  | K    | <b>605.3890</b>  | 303.1981        | 588.3624        | 294.6848         | 587.3784        | 294.1928         | 4 |
| 6 | <b>899.5258</b>  | 450.2665        | 882.4993       | 441.7533         | 881.5152       | 441.2613         | D    | <b>403.2300</b>  | 202.1186        | 386.2034        | 193.6053         | <b>385.2194</b> | 193.1133         | 3 |
| 7 | <b>1012.6099</b> | 506.8086        | 995.5833       | 498.2953         | 994.5993       | 497.8033         | I    | <b>288.2030</b>  | 144.6051        | 271.1765        | 136.0919         |                 |                  | 2 |
| 8 |                  |                 |                |                  |                |                  | R    | <b>175.1190</b>  | 88.0631         | 158.0924        | 79.5498          |                 |                  | 1 |



MS/MS Fragmentation of **ATKAAPR**Found in **A4UHQ9**, C2ORF3 variant 2 OS=Homo sapiens GN=C2orf3 PE=2 SV=1

Match to Query 446: 787.484408 from(394.749480, 2+) intensity(24143.3242)

Title: File307 Spectrum2175 scans: 2831

Data file \\192.168.1.104\public\raw data\Elite\_01\methylation\_ZW\k562\2013-5-23-K562-Kpropio-methyl-IP-Fr19-ZW.mgf

Click mouse within plot area to zoom in by factor of two about that point

Or,   to  Da Label all possible matches  Label matches used for scoring 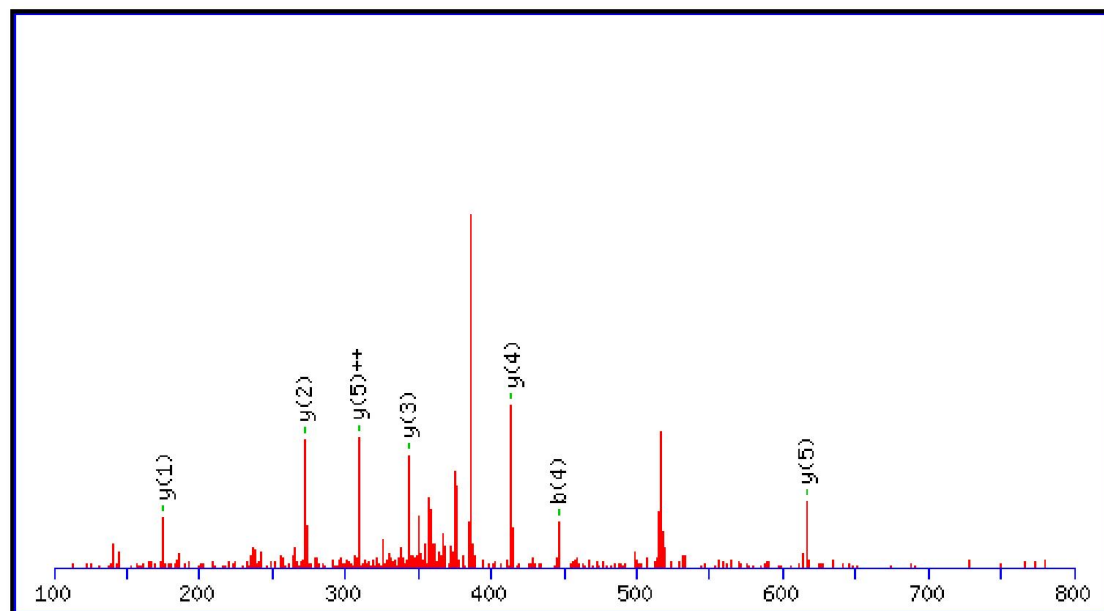**Monoisotopic mass of neutral peptide Mr(calc):** 787.4825**Fixed modifications:** Carbamidomethyl (C) (apply to specified residues or termini only)**Variable modifications:****K3** : Propionyl-(13CD3)Methyl (K)**Ions Score:** 29 **Expect:** 0.29**Matches** : 7/56 fragment ions using 1

| # | b        | b <sup>++</sup> | b <sup>*</sup> | b <sup>+++</sup> | b <sup>0</sup> | b <sup>0++</sup> | Seq. | y        | y <sup>++</sup> | y <sup>*</sup> | y <sup>+++</sup> | y <sup>0</sup> | y <sup>0++</sup> | # |
|---|----------|-----------------|----------------|------------------|----------------|------------------|------|----------|-----------------|----------------|------------------|----------------|------------------|---|
| 1 | 72.0444  | 36.5258         |                |                  |                |                  | A    |          |                 |                |                  |                |                  | 7 |
| 2 | 173.0921 | 87.0497         |                |                  | 155.0815       | 78.0444          | T    | 717.4526 | 359.2300        | 700.4261       | 350.7167         | 699.4421       | 350.2247         | 6 |
| 3 | 375.2511 | 188.1292        | 358.2245       | 179.6159         | 357.2405       | 179.1239         | K    | 616.4050 | 308.7061        | 599.3784       | 300.1928         |                |                  | 5 |
| 4 | 446.2882 | 223.6477        | 429.2616       | 215.1345         | 428.2776       | 214.6425         | A    | 414.2459 | 207.6266        | 397.2194       | 199.1133         |                |                  | 4 |
| 5 | 517.3253 | 259.1663        | 500.2988       | 250.6530         | 499.3147       | 250.1610         | A    | 343.2088 | 172.1081        | 326.1823       | 163.5948         |                |                  | 3 |
| 6 | 614.3781 | 307.6927        | 597.3515       | 299.1794         | 596.3675       | 298.6874         | P    | 272.1717 | 136.5895        | 255.1452       | 128.0762         |                |                  | 2 |
| 7 |          |                 |                |                  |                |                  | R    | 175.1190 | 88.0631         | 158.0924       | 79.5498          |                |                  | 1 |

MS/MS Fragmentation of **KGGPAPVDR**Found in **E7EU24**, Protein CBFA2T3 OS=Homo sapiens GN=CBFA2T3 PE=2 SV=2

Match to Query 2120: 969.551848 from(485.783200,2+) intensity(16014.0156)

Title: File307 Spectrum3376 scans: 4114

Data file \\192.168.1.104\public\raw data\Elite\_01\methylation\_ZWk562\2013-5-23-K562-Kpropio-methyl-IP-Fr19-ZW.mgf

Click mouse within plot area to zoom in by factor of two about that point

Or,   to  Da Label all possible matches  Label matches used for scoring 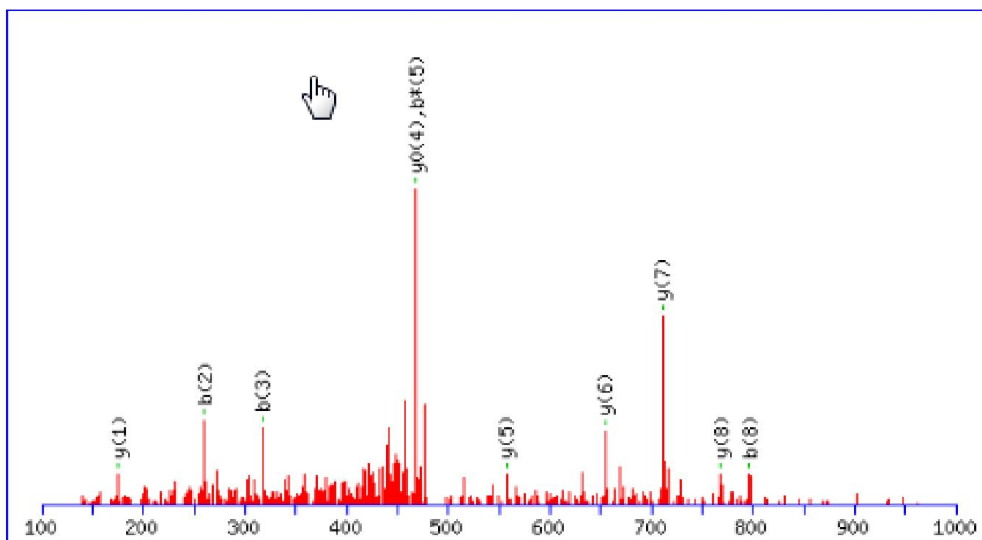

Monoisotopic mass of neutral peptide Mr(calc): 969.5516

Fixed modifications: Carbamidomethyl (C) (apply to specified residues or termini only)

Variable modifications:

K1 : Propionyl-(13CD3)Methyl (K)

Ions Score: 30 Expect: 0.37

Matches : 10/80 fragment ions using 18 most intense peaks ([help](#))

| # | b               | b <sup>++</sup> | b <sup>+</sup>  | b <sup>+++</sup> | b <sup>0</sup> | b <sup>0++</sup> | Seq. | y               | y <sup>++</sup> | y <sup>+</sup> | y <sup>+++</sup> | y <sup>0</sup>  | y <sup>0++</sup> | # |
|---|-----------------|-----------------|-----------------|------------------|----------------|------------------|------|-----------------|-----------------|----------------|------------------|-----------------|------------------|---|
| 1 | 203.1663        | 102.0868        | 186.1397        | 93.5735          |                |                  | K    |                 |                 |                |                  |                 |                  | 9 |
| 2 | <b>260.1878</b> | 130.5975        | 243.1612        | 122.0842         |                |                  | C    | <b>768.3999</b> | 384.7036        | 751.3733       | 376.1903         | 750.3893        | 375.6983         | 8 |
| 3 | <b>317.2092</b> | 159.1082        | 300.1827        | 150.5950         |                |                  | G    | <b>711.3784</b> | 356.1928        | 694.3519       | 347.6796         | 693.3678        | 347.1876         | 7 |
| 4 | 414.2620        | 207.6346        | 397.2354        | 199.1214         |                |                  | P    | <b>654.3570</b> | 327.6821        | 637.3304       | 319.1688         | 636.3464        | 318.6768         | 6 |
| 5 | 485.2991        | 243.1532        | <b>468.2725</b> | 234.6399         |                |                  | A    | <b>557.3042</b> | 279.1557        | 540.2776       | 270.6425         | 539.2936        | 270.1504         | 5 |
| 6 | 582.3519        | 291.6796        | 565.3253        | 283.1663         |                |                  | P    | 486.2671        | 243.6372        | 469.2405       | 235.1239         | <b>468.2565</b> | 234.6319         | 4 |
| 7 | 681.4203        | 341.2138        | 664.3937        | 332.7005         |                |                  | V    | 389.2143        | 195.1108        | 372.1878       | 186.5975         | 371.2037        | 186.1055         | 3 |
| 8 | <b>796.4472</b> | 398.7272        | 779.4207        | 390.2140         | 778.4367       | 389.7220         | D    | 290.1459        | 145.5766        | 273.1193       | 137.0633         | 272.1353        | 136.5713         | 2 |
| 9 |                 |                 |                 |                  |                |                  | R    | <b>175.1190</b> | 88.0631         | 158.0924       | 79.5498          |                 |                  | 1 |

Found in **B7Z6Q6**, Kinesin-like protein KIF2C OS=Homo sapiens GN=KIF2C PE=2 SV=1

Match to Query 2857: 1047.634008 from(524.824280,2+) intensity(47148.5039)

Title: File371 Spectrum9101 scans: 11107

Data file \\192.168.1.104\public\raw data\Elite\_01\methylation\_ZW\k562\2013-5-15-562-Kpropio-methyl-IP-Fr1-ZW.mgf

Click mouse within plot area to zoom in by factor of two about that point

Or,   to  Da Label all possible matches  Label matches used for scoring 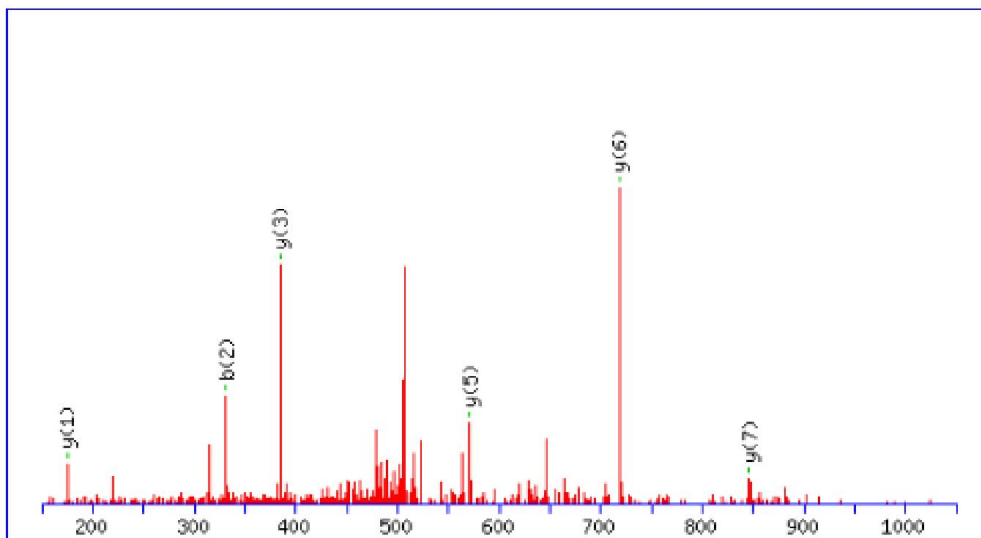

Monoisotopic mass of neutral peptide Mr(calc) : 1047.6349

Fixed modifications: Carbamidomethyl (C) (apply to specified residues or termini only)

Variable modifications:

K1 : Propionyl-(13CD3)Methyl (K)

Ions Score: 33 Expect: 0.12

Matches : 6/70 fragment ions using 9 most intense peaks ([help](#))

| # | b               | b <sup>++</sup> | b <sup>+</sup> | b <sup>+++</sup> | b <sup>0</sup> | b <sup>0++</sup> | Seq. | y               | y <sup>++</sup> | y <sup>+</sup> | y <sup>+++</sup> | y <sup>0</sup> | y <sup>0++</sup> | # |
|---|-----------------|-----------------|----------------|------------------|----------------|------------------|------|-----------------|-----------------|----------------|------------------|----------------|------------------|---|
| 1 | 203.1663        | 102.0868        | 186.1397       | 93.5735          |                |                  | K    |                 |                 |                |                  |                |                  | 8 |
| 2 | <b>331.2249</b> | 166.1161        | 314.1983       | 157.6028         |                |                  | Q    | <b>846.4832</b> | 423.7452        | 829.4567       | 415.2320         | 828.4726       | 414.7400         | 7 |
| 3 | 478.2933        | 239.6503        | 461.2667       | 231.1370         |                |                  | F    | <b>718.4246</b> | 359.7160        | 701.3981       | 351.2027         | 700.4141       | 350.7107         | 6 |
| 4 | 565.3253        | 283.1663        | 548.2988       | 274.6530         | 547.3147       | 274.1610         | S    | <b>571.3562</b> | 286.1817        | 554.3297       | 277.6685         | 553.3457       | 277.1765         | 5 |
| 5 | 664.3937        | 332.7005        | 647.3672       | 324.1872         | 646.3832       | 323.6952         | V    | 484.3242        | 242.6657        | 467.2976       | 234.1525         |                |                  | 4 |
| 6 | 761.4465        | 381.2269        | 744.4199       | 372.7136         | 743.4359       | 372.2216         | P    | <b>385.2558</b> | 193.1315        | 368.2292       | 184.6183         |                |                  | 3 |
| 7 | 874.5306        | 437.7689        | 857.5040       | 429.2556         | 856.5200       | 428.7636         | L    | 288.2030        | 144.6051        | 271.1765       | 136.0919         |                |                  | 2 |
| 8 |                 |                 |                |                  |                |                  | R    | <b>175.1190</b> | 88.0631         | 158.0924       | 79.5498          |                |                  | 1 |

MS/MS Fragmentation of **KSADPKR**Found in **E9PNV7**, Zinc finger protein 707 (Fragment) OS=Homo sapiens GN=ZNF707 PE=2 SV=1

Match to Query 1844: 930.540688 from(466.277620,2+) intensity(13520.3525)

Title: File368 Spectrum1790 scans: 2763

Data file \\192.168.1.104\public\raw data\Elite\_01\methylation\_ZW\k562\2013-6-3-K562-Kpropio-methyl-IP-Fr18-ZW.mgf

Click mouse within plot area to zoom in by factor of two about that point

Or,   to  Da Label all possible matches  Label matches used for scoring 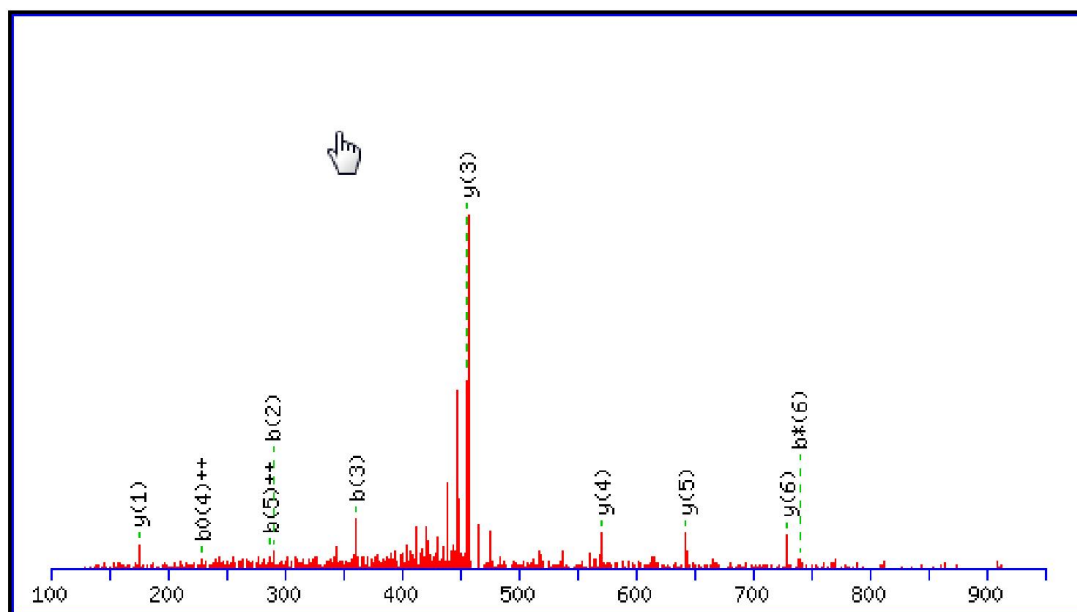Monoisotopic mass of neutral peptide **Mr(calc)**: 930.5407

Fixed modifications: Carbamidomethyl (C) (apply to specified residues or termini only)

Variable modifications:

**K1** : Propionyl-(13CD3)Methyl (K)**K6** : Propionyl (K)

Ions Score: 33 Expect: 0.16

Matches : 10/64 fragment ions using 16 mo

| # | b               | b <sup>++</sup> | b <sup>+</sup>  | b <sup>++</sup> | b <sup>0</sup> | b <sup>0++</sup> | Seq.     | y               | y <sup>++</sup> | y <sup>+</sup> | y <sup>++</sup> | y <sup>0</sup> | y <sup>0++</sup> | # |
|---|-----------------|-----------------|-----------------|-----------------|----------------|------------------|----------|-----------------|-----------------|----------------|-----------------|----------------|------------------|---|
| 1 | 203.1663        | 102.0868        | 186.1397        | 93.5735         |                |                  | <b>K</b> |                 |                 |                |                 |                |                  | 7 |
| 2 | <b>290.1983</b> | 145.6028        | 273.1718        | 137.0895        | 272.1878       | 136.5975         | <b>S</b> | <b>729.3890</b> | 365.1981        | 712.3624       | 356.6849        | 711.3784       | 356.1928         | 6 |
| 3 | <b>361.2354</b> | 181.1214        | 344.2089        | 172.6081        | 343.2249       | 172.1161         | <b>A</b> | <b>642.3570</b> | 321.6821        | 625.3304       | 313.1688        | 624.3464       | 312.6768         | 5 |
| 4 | 476.2624        | 238.6348        | 459.2358        | 230.1216        | 458.2518       | <b>229.6295</b>  | <b>D</b> | <b>571.3198</b> | 286.1636        | 554.2933       | 277.6503        | 553.3093       | 277.1583         | 4 |
| 5 | 573.3151        | <b>287.1612</b> | 556.2886        | 272.6479        | 555.3046       | 273.1559         | <b>P</b> | <b>456.2929</b> | 228.6501        | 439.2663       | 220.1368        |                |                  | 3 |
| 6 | 757.4363        | 379.2218        | <b>740.4098</b> | 370.7085        | 739.4258       | 370.2165         | <b>K</b> | 359.2401        | 180.1237        | 342.2136       | 171.6104        |                |                  | 2 |
| 7 |                 |                 |                 |                 |                |                  | <b>R</b> | <b>175.1190</b> | 88.0631         | 158.0924       | 79.5498         |                |                  | 1 |

Match to Query 7205: 1354.857388 from(678.435970,2+) intensity(117963.9531)

Title: File338 Spectrum11325 scans: 12646

Data file \\192.168.1.104\public\raw data\Elite\_01\methylation\_ZW\k562\2013-5-23-K562-Kpropio-methyl-IP-Fr17-ZW.mgf

Click mouse within plot area to zoom in by factor of two about that point

Or, Plot from  to  Da

Label all possible matches  Label matches used for scoring

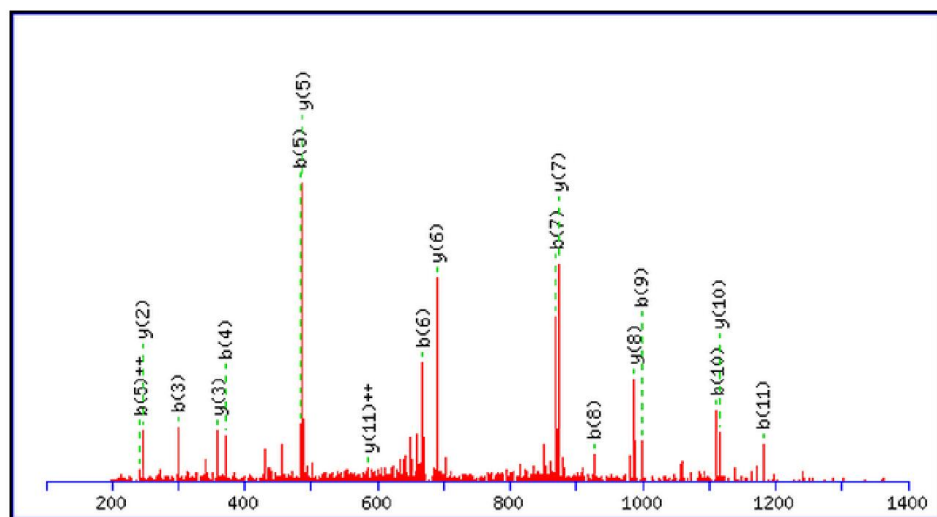

Monoisotopic mass of neutral peptide Mr(calc): 1354.8569  
 Fixed modifications: Carbamidomethyl (C) (apply to specified r  
 Variable modifications:  
 K1 : Propionyl (K)  
 K6 : Propionyl (K)  
 K7 : Propionyl-(13CD3)Methyl (K)  
 Ions Score: 66 Expect: 3.1e-005  
 Matches : 19/88 fragment ions using 35 most intense peaks (h

| #  | b                | b <sup>++</sup> | b*        | b <sup>+++</sup> | Seq. | y                | y <sup>++</sup> | y*        | y <sup>+++</sup> | #  |
|----|------------------|-----------------|-----------|------------------|------|------------------|-----------------|-----------|------------------|----|
| 1  | 185.1285         | 93.0679         | 168.1019  | 84.5546          | K    |                  |                 |           |                  | 12 |
| 2  | <b>242.1499</b>  | 121.5786        | 225.1234  | 113.0653         | G    | 1171.7430        | <b>586.3751</b> | 1154.7165 | 577.8619         | 11 |
| 3  | <b>299.1714</b>  | 150.0893        | 282.1448  | 141.5761         | G    | <b>1114.7215</b> | 557.8644        | 1097.6950 | 549.3511         | 10 |
| 4  | <b>370.2085</b>  | 185.6079        | 353.1819  | 177.0946         | A    | 1057.7001        | 529.3537        | 1040.6735 | 520.8404         | 9  |
| 5  | <b>483.2926</b>  | <b>242.1499</b> | 466.2660  | 233.6366         | L    | <b>986.6630</b>  | 493.8351        | 969.6364  | 485.3218         | 8  |
| 6  | <b>667.4137</b>  | 334.2105        | 650.3872  | 325.6972         | K    | <b>873.5789</b>  | 437.2931        | 856.5523  | 428.7798         | 7  |
| 7  | <b>869.5728</b>  | 435.2900        | 852.5462  | 426.7767         | K    | <b>689.4577</b>  | 345.2325        | 672.4312  | 336.7192         | 6  |
| 8  | <b>926.5942</b>  | 463.8007        | 909.5677  | 455.2875         | G    | <b>487.2987</b>  | 244.1530        | 470.2722  | 235.6397         | 5  |
| 9  | <b>997.6313</b>  | 499.3193        | 980.6048  | 490.8060         | A    | 430.2772         | 215.6423        | 413.2507  | 207.1290         | 4  |
| 10 | <b>1110.7154</b> | 555.8613        | 1093.6888 | 547.3481         | I    | <b>359.2401</b>  | 180.1237        | 342.2136  | 171.6104         | 3  |
| 11 | <b>1181.7525</b> | 591.3799        | 1164.7260 | 582.8666         | A    | <b>246.1561</b>  | 123.5817        | 229.1295  | 115.0684         | 2  |
| 12 |                  |                 |           |                  | R    | 175.1190         | 88.0631         | 158.0924  | 79.5498          | 1  |

Found in **B0QY89**, Eukaryotic translation initiation factor 3 subunit L OS=Homo sapiens GN=EIF3L PE=2 SV=1

Match to Query 5063: 1191.717988 from(596.866270,2+) intensity(30733.3301)

Title: File338 Spectrum9670 scans: 10880

Data file \\192.168.1.104\public\raw data\Elite\_01\methylation\_ZW\k562\2013-5-23-K562-Kpropio-methyl-IP-Fr17-ZW.mgf

Click mouse within plot area to zoom in by factor of two about that point

Or, Plot from  to  Da Label all possible matches  Label matches used for scoring 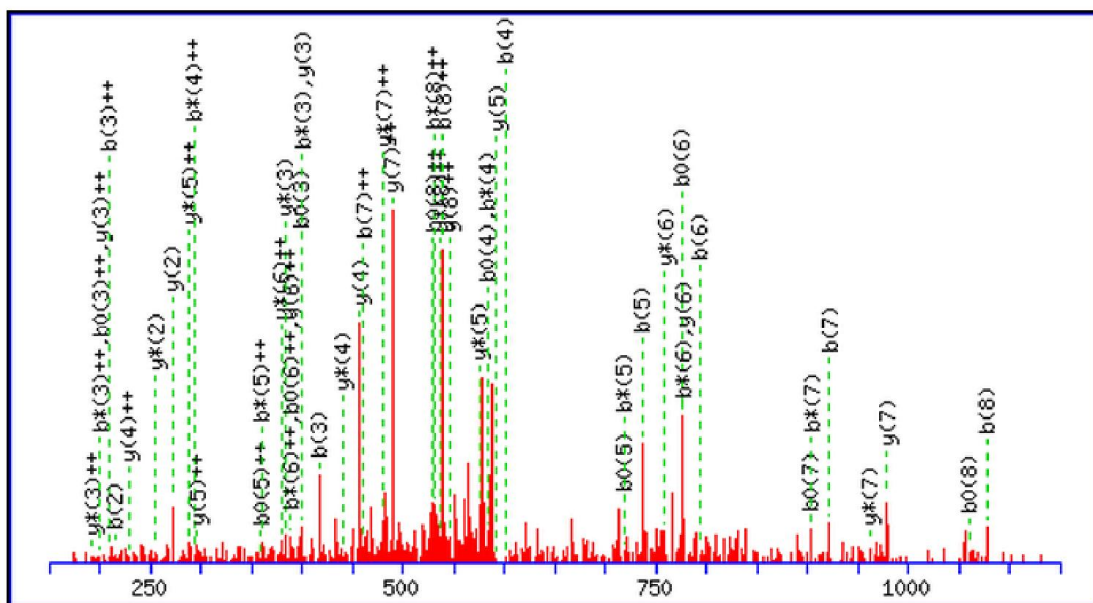

Monoisotopic mass of neutral peptide Mr(ca

Fixed modifications: Carbamidomethyl (C) (

Variable modifications:

K3 : Propionyl-(13CD3)Methyl (K)

K4 : Propionyl (K)

M5 : Label:13C(1)2H(3) (M)

Ions Score: 26 Expect: 0.65 ([help](#))

| # | b                | b <sup>++</sup> | b <sup>*</sup>  | b <sup>*++</sup> | b <sup>0</sup>   | b <sup>0++</sup> | Seq. | y               | y <sup>++</sup> | y <sup>*</sup>  | y <sup>*++</sup> | # |
|---|------------------|-----------------|-----------------|------------------|------------------|------------------|------|-----------------|-----------------|-----------------|------------------|---|
| 1 | 102.0550         | 51.5311         |                 |                  | 84.0444          | 42.5258          | T    |                 |                 |                 |                  | 9 |
| 2 | <b>215.1390</b>  | 108.0731        |                 |                  | 197.1285         | 99.0679          | L    | 1091.6787       | <b>546.3430</b> | 1074.6521       | <b>537.8297</b>  | 8 |
| 3 | <b>417.2980</b>  | <b>209.1527</b> | <b>400.2715</b> | <b>200.6394</b>  | <b>399.2875</b>  | <b>200.1474</b>  | K    | <b>978.5946</b> | <b>489.8009</b> | <b>961.5681</b> | <b>481.2877</b>  | 7 |
| 4 | <b>601.4192</b>  | 301.2132        | <b>584.3927</b> | <b>292.7000</b>  | <b>583.4086</b>  | 292.2080         | K    | <b>776.4356</b> | <b>388.7214</b> | <b>759.4091</b> | <b>380.2082</b>  | 6 |
| 5 | <b>736.4819</b>  | 368.7446        | <b>719.4553</b> | <b>360.2313</b>  | <b>718.4713</b>  | <b>359.7393</b>  | M    | <b>592.3144</b> | <b>296.6609</b> | <b>575.2879</b> | <b>288.1476</b>  | 5 |
| 6 | <b>793.5033</b>  | 397.2553        | <b>776.4768</b> | <b>388.7420</b>  | <b>775.4928</b>  | <b>388.2500</b>  | G    | <b>457.2518</b> | <b>229.1295</b> | <b>440.2252</b> | 220.6162         | 4 |
| 7 | <b>921.5619</b>  | <b>461.2846</b> | <b>904.5354</b> | 452.7713         | <b>903.5514</b>  | 452.2793         | Q    | <b>400.2303</b> | <b>200.6188</b> | <b>383.2037</b> | <b>192.1055</b>  | 3 |
| 8 | <b>1077.6630</b> | <b>539.3352</b> | 1060.6365       | <b>530.8219</b>  | <b>1059.6525</b> | <b>530.3299</b>  | R    | <b>272.1717</b> | 136.5895        | <b>255.1452</b> | 128.0762         | 2 |
| 9 |                  |                 |                 |                  |                  |                  | P    | 116.0706        | 58.5389         |                 |                  | 1 |

MS/MS Fragmentation of **KMGQPVLPR**Found in **B3KP41**, PHD finger protein 3 (Fragment) OS=Homo sapiens GN=PHF3 PE=2 SV=1

Match to Query 2817: 1102.671728 from(552.343140, 2+) intensity(35497.2188)

Title: File362 Spectrum8705 scans: 9956

Data file \\192.168.1.104\public\raw data\Elite\_01\methylation\_ZW\k562\2013-6-3-K562-Kpropio-methyl-IP-Fr16-ZW.mgf

Click mouse within plot area to zoom in by factor of two about that point

Or,   to  Da Label all possible matches  Label matches used for scoring 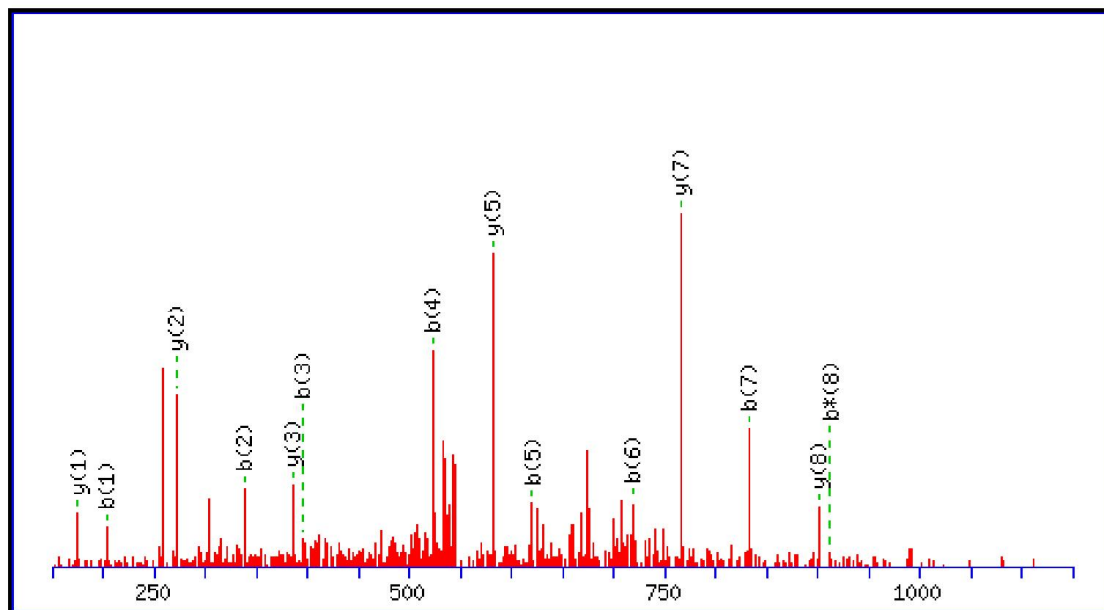**Monoisotopic mass of neutral peptide Mr(calc):** 1102.6714**Fixed modifications:** Carbamidomethyl (C) (apply to specified residues or**Variable modifications:****K1** : Propionyl-(13CD3)Methyl (K)**M2** : Label:13C(1)2H(3) (M)**Ions Score:** 44 **Expect:** 0.011**Matches** : 14/64 fragment ions using 29 most intense peaks ([help](#))

| # | b               | b <sup>++</sup> | b*              | b <sup>+++</sup> | Seq.     | y               | y <sup>++</sup> | y*       | y <sup>+++</sup> | #        |
|---|-----------------|-----------------|-----------------|------------------|----------|-----------------|-----------------|----------|------------------|----------|
| 1 | <b>203.1663</b> | 102.0868        | 186.1397        | 93.5735          | <b>K</b> |                 |                 |          |                  | <b>9</b> |
| 2 | <b>338.2290</b> | 169.6181        | 321.2024        | 161.1048         | <b>I</b> | <b>901.5197</b> | 451.2635        | 884.4931 | 442.7502         | <b>8</b> |
| 3 | <b>395.2504</b> | 198.1288        | 378.2239        | 189.6156         | <b>G</b> | <b>766.4570</b> | 383.7321        | 749.4305 | 375.2189         | <b>7</b> |
| 4 | <b>523.3090</b> | 262.1581        | 506.2825        | 253.6449         | <b>Q</b> | 709.4355        | 355.2214        | 692.4090 | 346.7081         | <b>6</b> |
| 5 | <b>620.3618</b> | 310.6845        | 603.3352        | 302.1712         | <b>P</b> | <b>581.3770</b> | 291.1921        | 564.3504 | 282.6788         | <b>5</b> |
| 6 | <b>719.4302</b> | 360.2187        | 702.4036        | 351.7055         | <b>V</b> | 484.3242        | 242.6657        | 467.2976 | 234.1525         | <b>4</b> |
| 7 | <b>832.5142</b> | 416.7608        | 815.4877        | 408.2475         | <b>L</b> | <b>385.2558</b> | 193.1315        | 368.2292 | 184.6183         | <b>3</b> |
| 8 | 929.5670        | 465.2871        | <b>912.5405</b> | 456.7739         | <b>P</b> | <b>272.1717</b> | 136.5895        | 255.1452 | 128.0762         | <b>2</b> |
| 9 |                 |                 |                 |                  | <b>R</b> | <b>175.1190</b> | 88.0631         | 158.0924 | 79.5498          | <b>1</b> |

MS/MS Fragmentation of **AYHKYKAKR**  
 Found in **E9PIZ3**, 60S ribosomal protein L8 OS=Homo sapiens GN=RPL8 PE=2 SV=1

Match to Query 5327: 1349.771468 from(675.893010, 2+) intensity(20911.5605)

Title: File362 Spectrum6575 scans: 7684

Data file \\192.168.1.104\public\raw data\Elite\_01\methylation\_ZW\k562\2013-6-3-K562-Kpropio-methyl-IP-Fr16-ZW.mgf

Click mouse within plot area to zoom in by factor of two about that point

Or,   to  Da

Label all possible matches  Label matches used for scoring

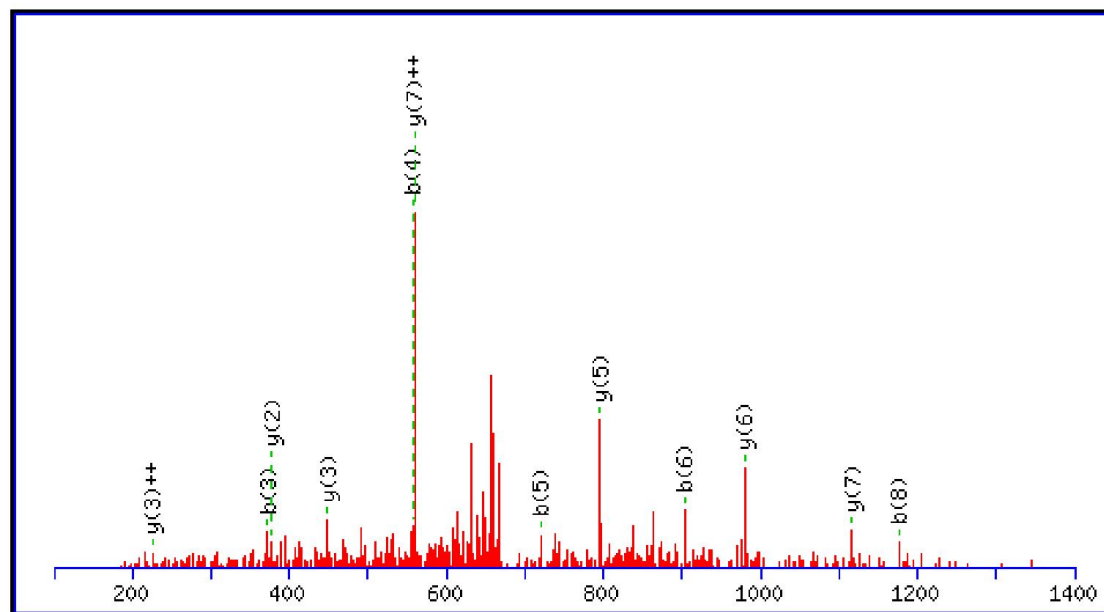

**Monoisotopic mass of neutral peptide Mr(calc):** 1349.7728

**Fixed modifications:** Carbamidomethyl (C) (apply to specified residues or

**Variable modifications:**

**K4** : Propionyl (K)

**K6** : Propionyl (K)

**K8** : Propionyl-(13CD3)Methyl (K)

**Ions Score:** 29 **Expect:** 0.47

**Matches** : 12/58 fragment ions using 24 most intense peaks ([help](#))

| # | b                | b <sup>++</sup> | b <sup>+</sup> | b <sup>++</sup> | Seq. | y                | y <sup>++</sup> | y <sup>+</sup> | y <sup>++</sup> | # |
|---|------------------|-----------------|----------------|-----------------|------|------------------|-----------------|----------------|-----------------|---|
| 1 | 72.0444          | 36.5258         |                |                 | A    |                  |                 |                |                 | 9 |
| 2 | 233.1077         | 118.0575        |                |                 | Y    | 1279.7430        | 640.3751        | 1262.7165      | 631.8619        | 8 |
| 3 | <b>372.1666</b>  | 186.5870        |                |                 | H    | <b>1116.6797</b> | <b>558.8435</b> | 1099.6531      | 550.3302        | 7 |
| 4 | <b>556.2878</b>  | 278.6475        | 539.2613       | 270.1343        | K    | <b>979.6208</b>  | 490.3140        | 962.5942       | 481.8007        | 6 |
| 5 | <b>719.3511</b>  | 360.1792        | 702.3246       | 351.6659        | Y    | <b>795.4996</b>  | 398.2534        | 778.4730       | 389.7402        | 5 |
| 6 | <b>903.4723</b>  | 452.2398        | 886.4458       | 443.7265        | K    | 632.4363         | 316.7218        | 615.4097       | 308.2085        | 4 |
| 7 | 974.5094         | 487.7584        | 957.4829       | 479.2451        | A    | <b>448.3151</b>  | <b>224.6612</b> | 431.2885       | 216.1479        | 3 |
| 8 | <b>1176.6684</b> | 588.8379        | 1159.6419      | 580.3246        | K    | <b>377.2780</b>  | 189.1426        | 360.2514       | 180.6293        | 2 |
| 9 |                  |                 |                |                 | R    | 175.1190         | 88.0631         | 158.0924       | 79.5498         | 1 |



MS/MS Fragmentation of **KGADLDR**Found in **B3KNZ8**, Arf-GAP with GTPase, ANK repeat and PH domain-containing protein 3 OS=Homo sapiens GN=CENTG3 PE=2 SV=1

Match to Query 531: 847.467808 from(424.741180, 2+) intensity(8125.7539)

Title: File362 Spectrum3602 scans: 4510

Data file \\192.168.1.104\public\raw data\Elite\_01\methylation\_ZW\k562\2013-6-3-K562-Kpropio-methyl-IP-Fr16-ZW.mgf

Click mouse within plot area to zoom in by factor of two about that point

Or,   to  Da Label all possible matches  Label matches used for scoring 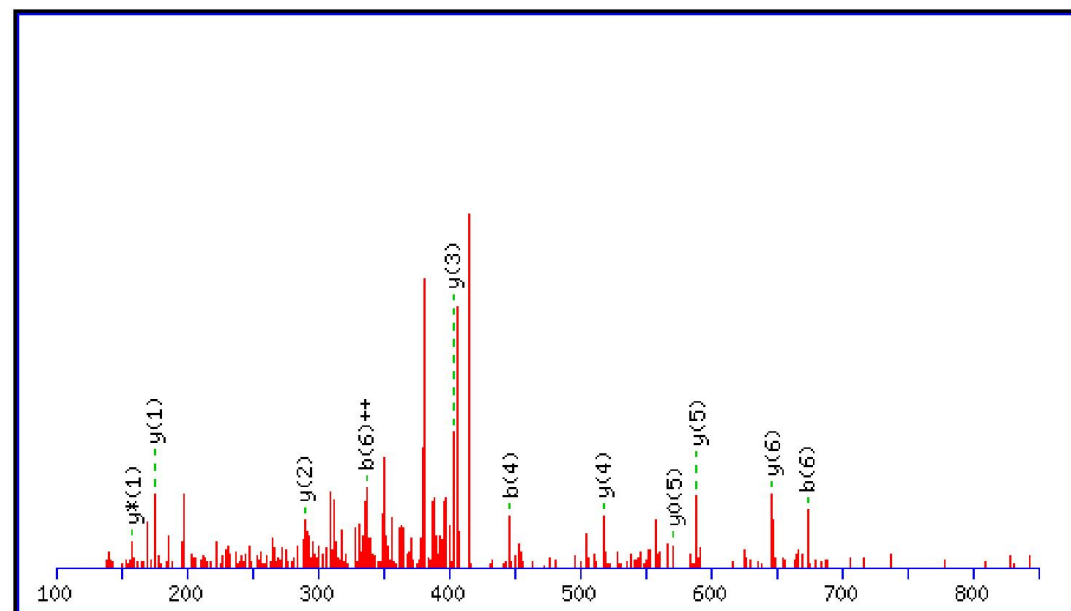**Monoisotopic mass of neutral peptide Mr(calc):** 847.4672**Fixed modifications:** Carbamidomethyl (C) (apply to specified residues or termini only)**Variable modifications:****K1** : Propionyl-(13CD3)Methyl (K)**Ions Score:** 30 **Expect:** 0.21**Matches** : 11/64 fragment ions using 3f

| # | b               | b <sup>++</sup> | b <sup>*</sup> | b <sup>***</sup> | b <sup>0</sup> | b <sup>0++</sup> | Seq. | y               | y <sup>++</sup> | y <sup>*</sup>  | y <sup>***</sup> | y <sup>0</sup>  | y <sup>0++</sup> | # |
|---|-----------------|-----------------|----------------|------------------|----------------|------------------|------|-----------------|-----------------|-----------------|------------------|-----------------|------------------|---|
| 1 | 203.1663        | 102.0868        | 186.1397       | 93.5735          |                |                  | K    |                 |                 |                 |                  |                 |                  | 7 |
| 2 | 260.1878        | 130.5975        | 243.1612       | 122.0842         |                |                  | G    | <b>646.3155</b> | 323.6614        | 629.2889        | 315.1481         | 628.3049        | 314.6561         | 6 |
| 3 | 331.2249        | 166.1161        | 314.1983       | 157.6028         |                |                  | A    | <b>589.2940</b> | 295.1506        | 572.2675        | 286.6374         | <b>571.2835</b> | 286.1454         | 5 |
| 4 | <b>446.2518</b> | 223.6295        | 429.2253       | 215.1163         | 428.2412       | 214.6243         | D    | <b>518.2569</b> | 259.6321        | 501.2304        | 251.1188         | 500.2463        | 250.6268         | 4 |
| 5 | 559.3359        | 280.1716        | 542.3093       | 271.6583         | 541.3253       | 271.1663         | L    | <b>403.2300</b> | 202.1186        | 386.2034        | 193.6053         | 385.2194        | 193.1133         | 3 |
| 6 | <b>674.3628</b> | <b>337.6850</b> | 657.3363       | 329.1718         | 656.3523       | 328.6798         | D    | <b>290.1459</b> | 145.5766        | 273.1193        | 137.0633         | 272.1353        | 136.5713         | 2 |
| 7 |                 |                 |                |                  |                |                  | R    | <b>175.1190</b> | 88.0631         | <b>158.0924</b> | 79.5498          |                 |                  | 1 |

MS/MS Fragmentation of **VIKTPR**Found in **Q9UMN6**, Histone-lysine N-methyltransferase MLL4 OS=Homo sapiens GN=WBP7 PE=1 SV=1

Match to Query 638: 786.523168 from(394.268860, 2+) intensity(120378.4922)

Title: File322 Spectrum4776 scans: 5610

Data file \\192.168.1.104\public\raw data\Elite\_01\methylation\_ZW\k562\2013-5-23-K562-Kpropio-methyl-IP-Fr15-ZW.mgf

Click mouse within plot area to zoom in by factor of two about that point

Or,   to  Da Label all possible matches  Label matches used for scoring 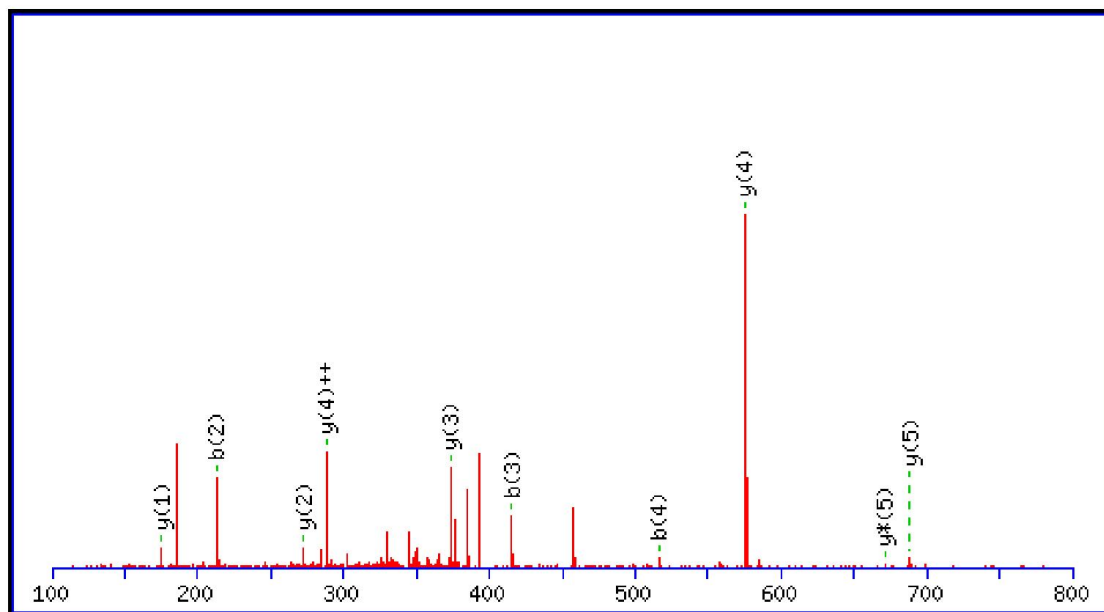**Monoisotopic mass of neutral peptide Mr(calc):** 786.5236**Fixed modifications:** Carbamidomethyl (C) (apply to specified residues or termini only)**Variable modifications:****K3** : Propionyl-(13CD3)Methyl (K)**Ions Score:** 29 **Expect:** 0.13**Matches** : 10/46 fragment ions using 21 most intense

| # | b               | b <sup>++</sup> | b*       | b <sup>+++</sup> | b <sup>0</sup> | b <sup>0++</sup> | Seq. | y               | y <sup>++</sup> | y*              | y <sup>+++</sup> | y <sup>0</sup> | y <sup>0++</sup> | # |
|---|-----------------|-----------------|----------|------------------|----------------|------------------|------|-----------------|-----------------|-----------------|------------------|----------------|------------------|---|
| 1 | 100.0757        | 50.5415         |          |                  |                |                  | V    |                 |                 |                 |                  |                |                  | 6 |
| 2 | <b>213.1598</b> | 107.0835        |          |                  |                |                  | I    | <b>688.4625</b> | 344.7349        | <b>671.4359</b> | 336.2216         | 670.4519       | 335.7296         | 5 |
| 3 | <b>415.3188</b> | 208.1630        | 398.2922 | 199.6497         |                |                  | K    | <b>575.3784</b> | <b>288.1928</b> | 558.3519        | 279.6796         | 557.3678       | 279.1876         | 4 |
| 4 | <b>516.3664</b> | 258.6869        | 499.3399 | 250.1736         | 498.3559       | 249.6816         | T    | <b>373.2194</b> | 187.1133        | 356.1928        | 178.6001         | 355.2088       | 178.1081         | 3 |
| 5 | 613.4192        | 307.2132        | 596.3927 | 298.7000         | 595.4086       | 298.2080         | P    | <b>272.1717</b> | 136.5895        | 255.1452        | 128.0762         |                |                  | 2 |
| 6 |                 |                 |          |                  |                |                  | R    | <b>175.1190</b> | 88.0631         | 153.0924        | 79.5498          |                |                  | 1 |

Found in **Q5T6W5**, Heterogeneous nuclear ribonucleoprotein K OS=Homo sapiens GN=HNRNPK PE=2 SV=1

Match to Query 203: 730.496248 from(366.255400,2+) intensity(11531.8877)

Title: File322 Spectrum6074 scans: 7020

Data file \\192.168.1.104\public\raw data\Elite\_01\methylation\_ZW\k562\2013-5-23-K562-Kpropio-methyl-IP-Fr15-ZW.mgf

Click mouse within plot area to zoom in by factor of two about that point

Or, Plot from  to  Da Label all possible matches  Label matches used for scoring 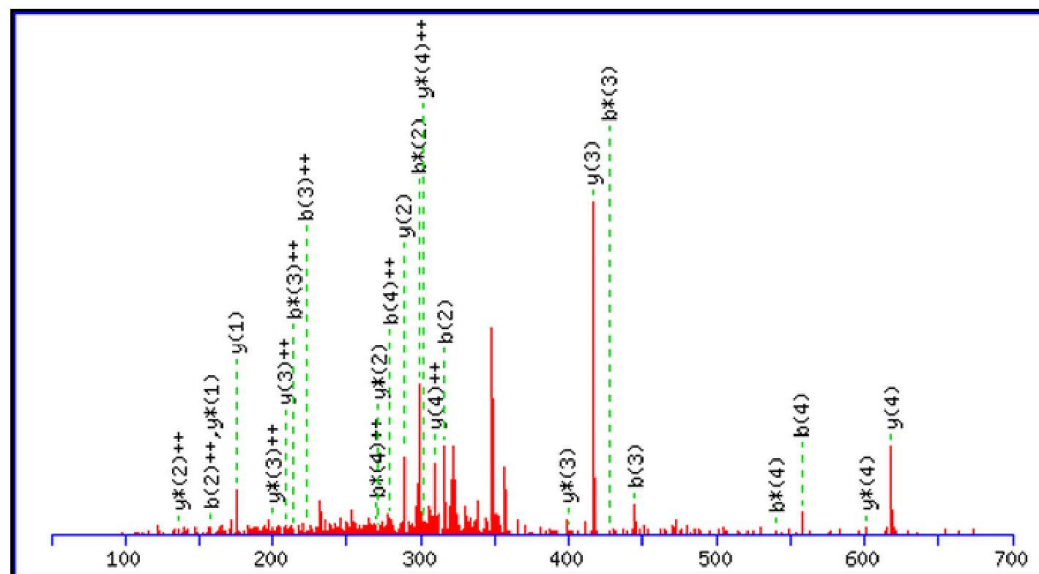

Monoisotopic mass of neutral peptide Mr(calc): 730.4974

Fixed modifications: Carbamidomethyl (C) (apply to specified residues or termini only)

Variable modifications:

K2 : Propionyl-(13CD3)Met

Ions Score: 30 Expect: 0.12

| # | b        | b <sup>++</sup> | b*       | b <sup>*++</sup> | Seq. | y        | y <sup>++</sup> | y*       | y <sup>*++</sup> | # |
|---|----------|-----------------|----------|------------------|------|----------|-----------------|----------|------------------|---|
| 1 | 114.0913 | 57.5493         |          |                  | I    |          |                 |          |                  | 5 |
| 2 | 316.2504 | 158.6288        | 299.2238 | 150.1155         | K    | 618.4206 | 309.7139        | 601.3941 | 301.2007         | 4 |
| 3 | 444.3089 | 222.6581        | 427.2824 | 214.1448         | Q    | 416.2616 | 208.6344        | 399.2350 | 200.1212         | 3 |
| 4 | 557.3930 | 279.2001        | 540.3664 | 270.6869         | I    | 288.2030 | 144.6051        | 271.1765 | 136.0919         | 2 |
| 5 |          |                 |          |                  | R    | 175.1190 | 88.0631         | 158.0924 | 79.5498          | 1 |

Found in **J3KR15**, N-acyl-phosphatidylethanolamine-hydrolyzing phospholipase D OS=Homo sapiens GN=NAPEPLD PE=4 SV=1

Match to Query 217: 733.435708 from(367.725130,2+) intensity(31839.1367)

Title: File322 Spectrum1004 scans: 1475

Data file \\192.168.1.104\public\raw data\Elite\_01\methylation\_ZW\k562\2013-5-23-K562-Kpropio-methyl-IP-Fr15-ZW.mgf

Click mouse within plot area to zoom in by factor of two about that point

Or,   to  Da Label all possible matches  Label matches used for scoring 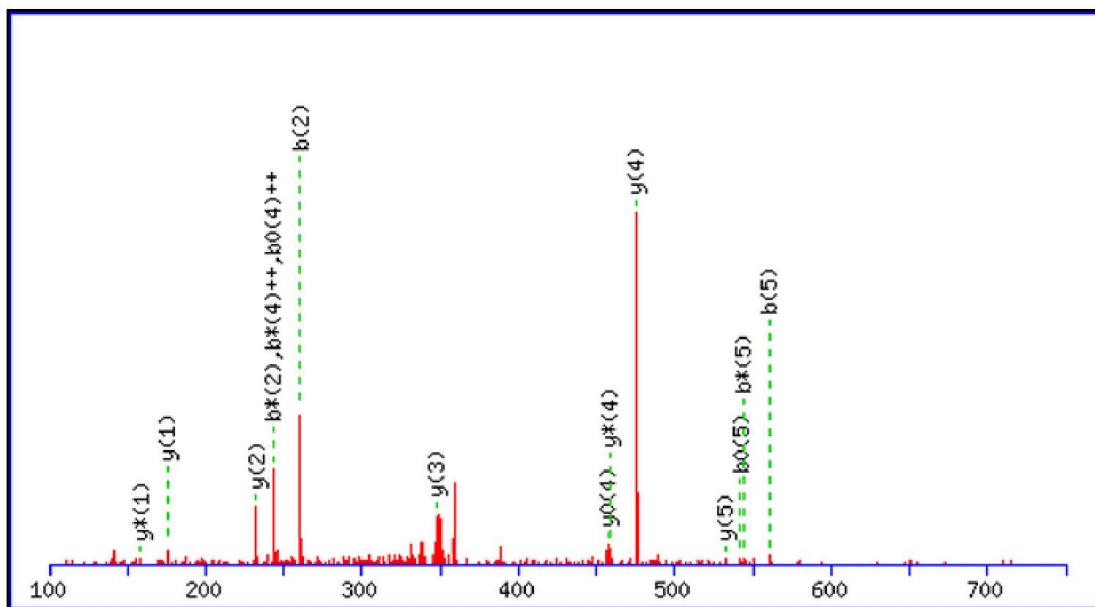

Monoisotopic mass of neutral peptide Mr(calc): 733.4355

Fixed modifications: Carbamidomethyl (C) (apply to specified residues or termini only)

Variable modifications:

K1 : Propionyl-(13C)

Ions Score: 36 Expect:

Matches : 15/50 fragment

| # | b               | b <sup>++</sup> | b <sup>*</sup>  | b <sup>*++</sup> | b <sup>0</sup>  | b <sup>0++</sup> | Seq. | y               | y <sup>++</sup> | y <sup>*</sup>  | y <sup>*++</sup> | y <sup>0</sup>  | y <sup>0++</sup> | # |
|---|-----------------|-----------------|-----------------|------------------|-----------------|------------------|------|-----------------|-----------------|-----------------|------------------|-----------------|------------------|---|
| 1 | 203.1663        | 102.0868        | 186.1397        | 93.5735          |                 |                  | K    |                 |                 |                 |                  |                 |                  | 6 |
| 2 | <b>260.1878</b> | 130.5975        | <b>243.1612</b> | 122.0842         |                 |                  | G    | <b>532.2838</b> | 266.6455        | 515.2572        | 258.1323         | 514.2732        | 257.6402         | 5 |
| 3 | 388.2827        | 194.6450        | 371.2562        | 186.1317         |                 |                  | K    | <b>475.2623</b> | 238.1348        | <b>458.2358</b> | 229.6215         | <b>457.2518</b> | 229.1295         | 4 |
| 4 | 503.3097        | 252.1585        | 486.2831        | <b>243.6452</b>  | 485.2991        | <b>243.1532</b>  | D    | <b>347.1674</b> | 174.0873        | 330.1408        | 165.5740         | 329.1568        | 165.0820         | 3 |
| 5 | <b>560.3311</b> | 280.6692        | <b>543.3046</b> | 272.1559         | <b>542.3206</b> | 271.6639         | G    | <b>232.1404</b> | 116.5738        | 215.1139        | 108.0606         |                 |                  | 2 |
| 6 |                 |                 |                 |                  |                 |                  | R    | <b>175.1190</b> | 88.0631         | <b>158.0924</b> | 79.5498          |                 |                  | 1 |

Found in **F6QR24**, Nuclear pore complex protein Nup153 OS=Homo sapiens GN=NUP153 PE=2 SV=1

Match to Query 2027: 944.628208 from(473.321380,2+) intensity(59718.7695)

Title: File359 Spectrum6194 scans: 7336

Data file \\192.168.1.104\public\raw data\Elite\_01\methylation\_ZW\k562\2013-6-3-K562-Kpropio-methyl-IP-Fr14-ZW.mgf

Click mouse within plot area to zoom in by factor of two about that point

Or, Plot from  to  Da Label all possible matches  Label matches used for scoring 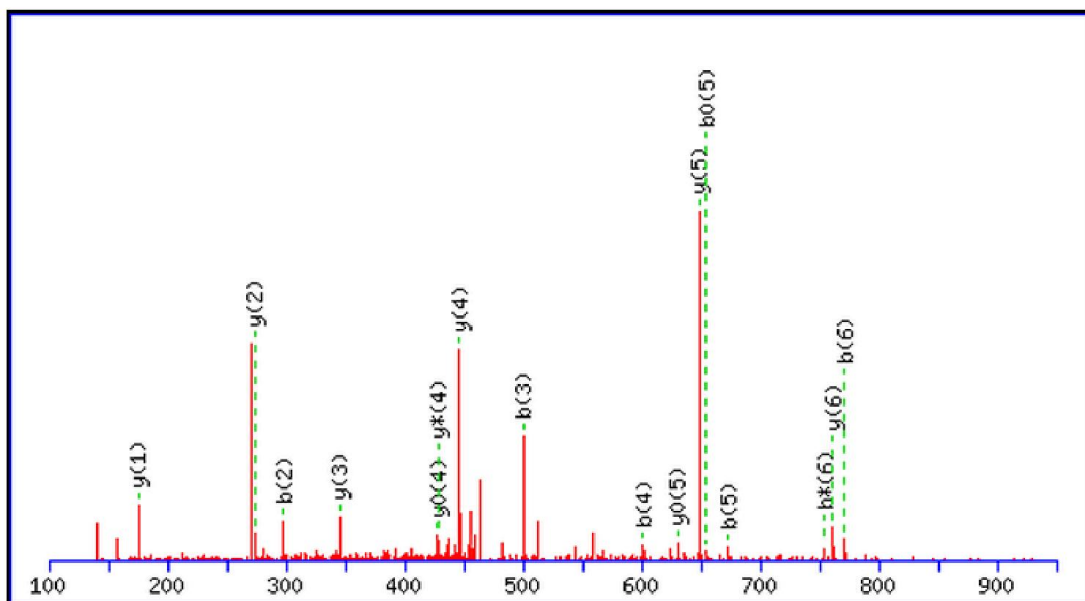

Monoisotopic mass of neutral peptide Mr(calc): 944.6291

Fixed modifications: Carbamidomethyl (C) (apply to specified residues or termini only)

Variable modifications:

K1 : Propionyl (K)

K3 : Propionyl-(13CD3)Me

Ions Score: 37 Expect: 0.02

Matches : 16/60 fragment ion

| # | b               | b <sup>++</sup> | b <sup>*</sup>  | b <sup>*++</sup> | b <sup>0</sup>  | b <sup>0++</sup> | Seq. | y               | y <sup>++</sup> | y <sup>*</sup>  | y <sup>*++</sup> | y <sup>0</sup>  | y <sup>0++</sup> | # |
|---|-----------------|-----------------|-----------------|------------------|-----------------|------------------|------|-----------------|-----------------|-----------------|------------------|-----------------|------------------|---|
| 1 | 185.1285        | 93.0679         | 168.1019        | 84.5546          |                 |                  | K    |                 |                 |                 |                  |                 |                  | 7 |
| 2 | <b>298.2125</b> | 149.6099        | 281.1860        | 141.0966         |                 |                  | I    | <b>761.5152</b> | 381.2613        | 744.4887        | 372.7480         | 743.5047        | 372.2560         | 6 |
| 3 | <b>500.3715</b> | 250.6894        | 483.3450        | 242.1761         |                 |                  | K    | <b>648.4312</b> | 324.7192        | 631.4046        | 316.2059         | <b>630.4206</b> | 315.7139         | 5 |
| 4 | <b>601.4192</b> | 301.2132        | 584.3927        | 292.7000         | 583.4086        | 292.2080         | T    | <b>446.2722</b> | 223.6397        | <b>429.2456</b> | 215.1264         | <b>428.2616</b> | 214.6344         | 4 |
| 5 | <b>672.4563</b> | 336.7318        | 655.4298        | 328.2185         | <b>654.4458</b> | 327.7265         | A    | <b>345.2245</b> | 173.1159        | 328.1979        | 164.6026         |                 |                  | 3 |
| 6 | <b>771.5247</b> | 386.2660        | <b>754.4982</b> | 377.7527         | 753.5142        | 377.2607         | V    | <b>274.1874</b> | 137.5973        | 257.1608        | 129.0840         |                 |                  | 2 |
| 7 |                 |                 |                 |                  |                 |                  | R    | <b>175.1190</b> | 88.0631         | 158.0924        | 79.5498          |                 |                  | 1 |

Found in **M0QZ22**, Protein Smaug homolog 2 OS=Homo sapiens GN=SAMD4B PE=4 SV=1

Match to Query 7830: 1379.879382 from(460.967070,3+) intensity(103940.1094)

Title: File359 Spectrum6643 scans: 7815

Data file \\192.168.1.104\public\raw data\Elite\_01\methylation\_ZW\k562\2013-6-3-K562-Kpropio-methyl-IP-Fr14-ZW.mgf

Click mouse within plot area to zoom in by factor of two about that point

Or,  100  1150 Da Label all possible matches  Label matches used for scoring 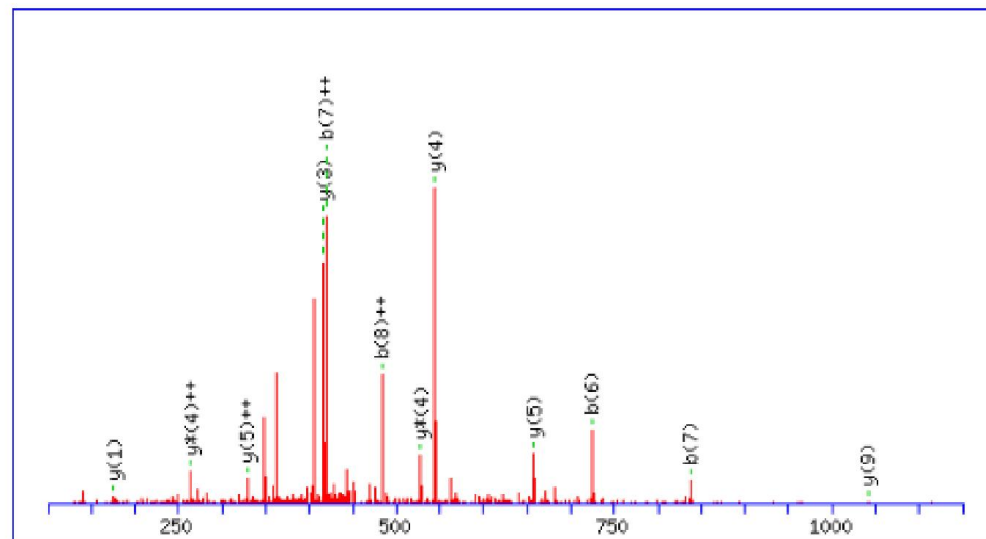

Monoisotopic mass of neutral peptide Mr(calc): 1379.8885

Fixed modifications: Carbamidomethyl (C) (apply to specified residues or termini only)

Variable modifications:

K2 : Propionyl-(13CD3)Methyl (K)

Ions Score: 26 Expect: 0.24

Matches : 12/98 fragment ions using 20 most intense peaks ([help](#))

| #  | b               | b <sup>++</sup> | b <sup>+</sup> | b <sup>+++</sup> | b <sup>0</sup> | b <sup>0++</sup> | Seq. | y                | y <sup>++</sup> | y <sup>+</sup>  | y <sup>+++</sup> | y <sup>0</sup> | y <sup>0++</sup> | #  |
|----|-----------------|-----------------|----------------|------------------|----------------|------------------|------|------------------|-----------------|-----------------|------------------|----------------|------------------|----|
| 1  | 138.0662        | 69.5367         |                |                  |                |                  | H    |                  |                 |                 |                  |                |                  | 11 |
| 2  | 340.2252        | 170.6162        | 323.1987       | 162.1030         |                |                  | K    | 1243.8369        | 622.4221        | 1226.8104       | 613.9088         | 1225.8263      | 613.4168         | 10 |
| 3  | 453.3093        | 227.1583        | 436.2827       | 218.6450         |                |                  | I    | <b>1041.6779</b> | 521.3426        | 1024.6513       | 512.8293         | 1023.6673      | 512.3373         | 9  |
| 4  | 524.3464        | 262.6768        | 507.3198       | 254.1636         |                |                  | A    | 928.5938         | 464.8006        | 911.5673        | 456.2873         | 910.5833       | 455.7953         | 8  |
| 5  | 637.4304        | 319.2189        | 620.4039       | 310.7056         |                |                  | L    | 857.5567         | 429.2820        | 840.5302        | 420.7687         | 839.5461       | 420.2767         | 7  |
| 6  | <b>724.4625</b> | 362.7349        | 707.4359       | 354.2216         | 706.4519       | 353.7296         | S    | 744.4726         | 372.7400        | 727.4461        | 364.2267         | 726.4621       | 363.7347         | 6  |
| 7  | <b>837.5465</b> | <b>419.2769</b> | 820.5200       | 410.7636         | 819.5360       | 410.2716         | I    | <b>657.4406</b>  | <b>329.2239</b> | 640.4141        | 320.7107         |                |                  | 5  |
| 8  | 965.6051        | <b>483.3062</b> | 948.5786       | 474.7929         | 947.5945       | 474.3009         | Q    | <b>544.3566</b>  | 272.6819        | <b>527.3300</b> | <b>264.1686</b>  |                |                  | 4  |
| 9  | 1093.7001       | 547.3537        | 1076.6735      | 538.8404         | 1075.6895      | 538.3484         | K    | <b>416.2980</b>  | 208.6526        | 399.2714        | 200.1394         |                |                  | 3  |
| 10 | 1206.7841       | 603.8957        | 1189.7576      | 595.3824         | 1188.7736      | 594.8904         | L    | 288.2030         | 144.6051        | 271.1765        | 136.0919         |                |                  | 2  |
| 11 |                 |                 |                |                  |                |                  | R    | <b>175.1190</b>  | 88.0631         | 158.0924        | 79.5498          |                |                  | 1  |

Found in **B5MCI0**, Smoothelin OS=Homo sapiens GN=SMTN PE=2 SV=1

Match to Query 16027: 2215.205892 from(739.409240,3+) intensity(84502.7578)

Title: File359 Spectrum14992 scans: 16720

Data file \\192.168.1.104\public\raw data\Elite\_01\methylation\_ZW\k562\2013-6-3-K562-Kpropio-methyl-IP-Fr14-ZW.mgf

Click mouse within plot area to zoom in by factor of two about that point

Or,  200  1900  Label all possible matches  Label matches used for scoring 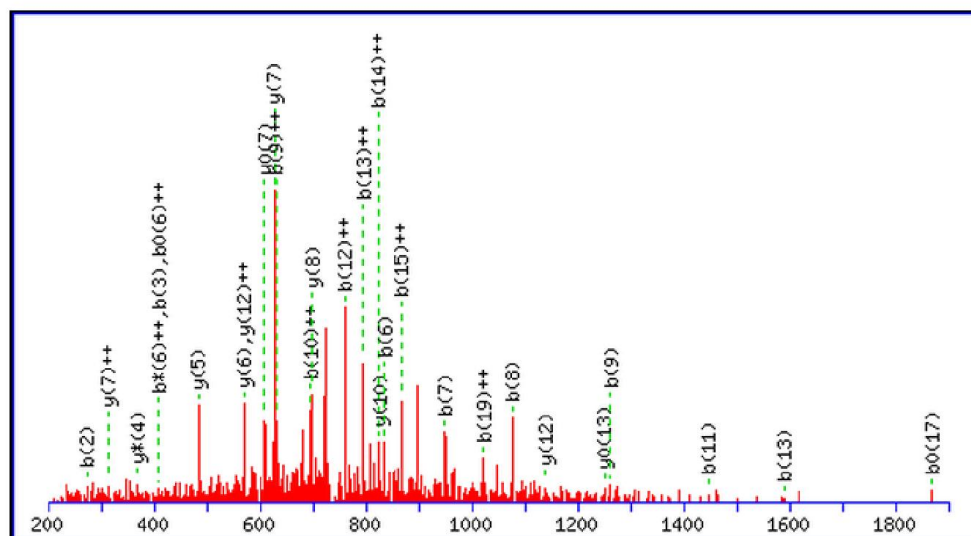

Monoisotopic mass of neutral peptide Mr(calc): 2215.2063

Fixed modifications: Carbamidomethyl (C) (apply to specified res

Variable modifications:

K1 : Propionyl-(13CD3)Methyl (K)

M3 : Label:13C(1)2H(3) (M)

K6 : Propionyl (K)

K9 : Propionyl (K)

Ions Score: 31 Expect: 0.53

Matches : 29/210 fragment ions using 72 most intense peaks

| #  | b                | b <sup>++</sup>  | b <sup>*</sup> | b <sup>+++</sup> | b <sup>0</sup>   | b <sup>0++</sup> | Seq. | y                | y <sup>++</sup> | y <sup>*</sup>  | y <sup>+++</sup> | y <sup>0</sup>   | y <sup>0++</sup> | #  |
|----|------------------|------------------|----------------|------------------|------------------|------------------|------|------------------|-----------------|-----------------|------------------|------------------|------------------|----|
| 1  | 203.1663         | 102.0868         | 186.1397       | 93.5735          |                  |                  | K    |                  |                 |                 |                  |                  |                  | 20 |
| 2  | <b>274.2034</b>  | 137.6053         | 257.1769       | 129.0921         |                  |                  | A    | 2014.0546        | 1007.5310       | 1997.0281       | 999.0177         | 1996.0441        | 998.5257         | 19 |
| 3  | <b>409.2661</b>  | 205.1367         | 392.2395       | 196.6234         |                  |                  | M    | 1943.0175        | 972.0124        | 1925.9910       | 963.4991         | 1925.0070        | 963.0071         | 18 |
| 4  | 522.3501         | 261.6787         | 505.3236       | 253.1654         |                  |                  | I    | 1807.9549        | 904.4811        | 1790.9283       | 895.9678         | 1789.9443        | 895.4758         | 17 |
| 5  | 651.3927         | 326.2000         | 634.3662       | 317.6867         | 633.3822         | 317.1947         | E    | 1694.8708        | 847.9390        | 1677.8442       | 839.4258         | 1676.8602        | 838.9338         | 16 |
| 6  | <b>835.5139</b>  | 418.2606         | 818.4874       | <b>409.7473</b>  | 817.5033         | <b>409.2553</b>  | K    | 1565.8282        | 783.4177        | 1548.8016       | 774.9045         | 1547.8176        | 774.4125         | 15 |
| 7  | <b>948.5980</b>  | 474.8026         | 931.5714       | 466.2893         | 930.5874         | 465.7973         | L    | 1381.7070        | 691.3571        | 1364.6805       | 682.8439         | 1363.6965        | 682.3519         | 14 |
| 8  | <b>1077.6406</b> | 539.3239         | 1060.6140      | 530.8106         | 1059.6300        | 530.3186         | E    | 1268.6230        | 634.8151        | 1251.5964       | 626.3018         | <b>1250.6124</b> | 625.8098         | 13 |
| 9  | <b>1261.7617</b> | <b>631.3845</b>  | 1244.7352      | 622.8712         | 1243.7512        | 622.3792         | K    | <b>1139.5804</b> | <b>570.2938</b> | 1122.5538       | 561.7805         | 1121.5698        | 561.2885         | 12 |
| 10 | 1390.8043        | <b>695.9058</b>  | 1373.7778      | 687.3925         | 1372.7938        | 686.9005         | E    | 955.4592         | 478.2332        | 938.4326        | 469.7200         | 937.4486         | 469.2279         | 11 |
| 11 | <b>1447.8258</b> | 724.4165         | 1430.7993      | 715.9033         | 1429.8152        | 715.4113         | G    | <b>826.4166</b>  | 413.7119        | 809.3900        | 405.1987         | 808.4060         | 404.7067         | 10 |
| 12 | 1518.8629        | <b>759.9351</b>  | 1501.8364      | 751.4218         | 1500.8523        | 750.9298         | A    | 769.3951         | 385.2012        | 752.3686        | 376.6879         | 751.3846         | 376.1959         | 9  |
| 13 | <b>1589.9000</b> | <b>795.4537</b>  | 1572.8735      | 786.9404         | 1571.8895        | 786.4484         | A    | <b>698.3580</b>  | 349.6826        | 681.3315        | 341.1694         | 680.3474         | 340.6774         | 8  |
| 14 | 1646.9215        | <b>823.9644</b>  | 1629.8949      | 815.4511         | 1628.9109        | 814.9591         | G    | <b>627.3209</b>  | <b>314.1641</b> | 610.2944        | 305.6508         | <b>609.3103</b>  | 305.1588         | 7  |
| 15 | 1733.9535        | <b>867.4804</b>  | 1716.9270      | 858.9671         | 1715.9430        | 858.4751         | S    | <b>570.2994</b>  | 285.6534        | 553.2729        | 277.1401         | 552.2889         | 276.6481         | 6  |
| 16 | 1831.0063        | 916.0068         | 1813.9797      | 907.4935         | 1812.9957        | 907.0015         | P    | <b>483.2674</b>  | 242.1373        | 466.2409        | 233.6241         |                  |                  | 5  |
| 17 | 1888.0277        | 944.5175         | 1871.0012      | 936.0042         | <b>1870.0172</b> | 935.5122         | G    | 386.2146         | 193.6110        | <b>369.1881</b> | 185.0577         |                  |                  | 4  |
| 18 | 1945.0492        | 973.0282         | 1928.0227      | 964.5150         | 1927.0386        | 964.0230         | G    | 329.1932         | 165.1002        | 312.1666        | 156.5870         |                  |                  | 3  |
| 19 | 2042.1020        | <b>1021.5546</b> | 2025.0754      | 1013.0414        | 2024.0914        | 1012.5493        | P    | 272.1717         | 136.5895        | 255.1452        | 128.0762         |                  |                  | 2  |
| 20 |                  |                  |                |                  |                  |                  | R    | 175.1190         | 88.0631         | 158.0924        | 79.5498          |                  |                  | 1  |

Found in **Q9Y6V7**, Probable ATP-dependent RNA helicase DDX49 OS=Homo sapiens GN=DDX49 PE=1 SV=1

Match to Query 9979: 1591.910248 from(796.962400, 2+) intensity(52408.3398)

Title: File336 Spectrum12200 scans: 13758

Data file \\192.168.1.104\public\raw data\Elite\_01\methylation\_ZW\k562\2013-5-23-K562-Kpropio-methyl-IP-Fr13-ZW.mgf

Click mouse within plot area to zoom in by factor of two about that point

Or,   to  Da Label all possible matches  Label matches used for scoring 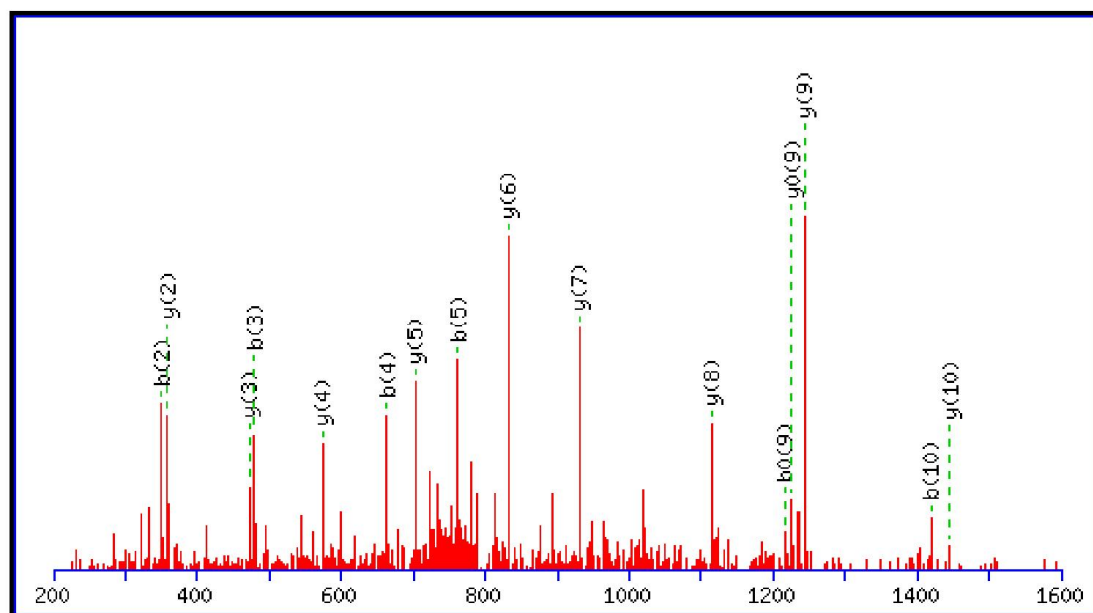**Monoisotopic mass of neutral peptide Mr(calc):** 1591.9094**Fixed modifications:** Carbamidomethyl (C) (apply to specified residues or termini only)**Variable modifications:****K2** : Propionyl-(13CD3)Methyl (K)**K4** : Propionyl (K)**K10** : Propionyl (K)**Ions Score:** 62 **Expect:** 0.00027**Matches** : 16/108 fragment ions using 27 most intense peaks

| #  | b                | b <sup>++</sup> | b <sup>+</sup> | b <sup>+</sup> ++ | b <sup>0</sup>   | b <sup>0</sup> ++ | Seq. | y                | y <sup>++</sup> | y <sup>+</sup> | y <sup>+</sup> ++ | y <sup>0</sup>   | y <sup>0</sup> ++ | #  |
|----|------------------|-----------------|----------------|-------------------|------------------|-------------------|------|------------------|-----------------|----------------|-------------------|------------------|-------------------|----|
| 1  | 148.0757         | 74.5415         |                |                   |                  |                   | F    |                  |                 |                |                   |                  |                   | 11 |
| 2  | <b>350.2347</b>  | 175.6210        | 333.2082       | 167.1077          |                  |                   | K    | <b>1445.8483</b> | 723.4278        | 1428.8217      | 714.9145          | 1427.8377        | 714.4225          | 10 |
| 3  | <b>479.2773</b>  | 240.1423        | 462.2507       | 231.6290          | 461.2667         | 231.1370          | E    | <b>1243.6892</b> | 622.3483        | 1226.6627      | 613.8350          | <b>1225.6787</b> | 613.3430          | 9  |
| 4  | <b>663.3985</b>  | 332.2029        | 646.3719       | 323.6896          | 645.3879         | 323.1976          | K    | <b>1114.6467</b> | 557.8270        | 1097.6201      | 549.3137          | 1096.6361        | 548.8217          | 8  |
| 5  | <b>762.4669</b>  | 381.7371        | 745.4403       | 373.2238          | 744.4563         | 372.7318          | V    | <b>930.5255</b>  | 465.7664        | 913.4989       | 457.2531          | 912.5149         | 456.7611          | 7  |
| 6  | 891.5095         | 446.2584        | 874.4829       | 437.7451          | 873.4989         | 437.2531          | E    | <b>831.4571</b>  | 416.2322        | 814.4305       | 407.7189          | 813.4465         | 407.2269          | 6  |
| 7  | 1020.5521        | 510.7797        | 1003.5255      | 502.2664          | 1002.5415        | 501.7744          | E    | <b>702.4145</b>  | 351.7109        | 685.3879       | 343.1976          | 684.4039         | 342.7056          | 5  |
| 8  | 1121.5998        | 561.3035        | 1104.5732      | 552.7902          | 1103.5892        | 552.2982          | T    | <b>573.3719</b>  | 287.1896        | 556.3453       | 278.6763          | 555.3613         | 278.1843          | 4  |
| 9  | 1234.6838        | 617.8455        | 1217.6573      | 609.3323          | <b>1216.6733</b> | 608.8403          | L    | <b>472.3242</b>  | 236.6657        | 455.2976       | 228.1525          |                  |                   | 3  |
| 10 | <b>1418.8050</b> | 709.9061        | 1401.7784      | 701.3929          | 1400.7944        | 700.9009          | K    | <b>359.2401</b>  | 180.1237        | 342.2136       | 171.6104          |                  |                   | 2  |
| 11 |                  |                 |                |                   |                  |                   | R    | 175.1190         | 88.0631         | 158.0924       | 79.5498           |                  |                   | 1  |



Found in **O94761**, ATP-dependent DNA helicase Q4 OS=Homo sapiens GN=RECQL4 PE=1 SV=1

Match to Query 12792: 1837.107388 from(919.560970,2+) intensity(66936.5391)

Title: File336 Spectrum14773 scans: 16502

Data file \\192.168.1.104\public\raw data\Elite\_01\methylation\_ZW\k562\2013-5-23-K562-Kpropio-methyl-IP-Fr13-ZW.mgf

Click mouse within plot area to zoom in by factor of two about that point

Or,   to  Da Label all possible matches  Label matches used for scoring 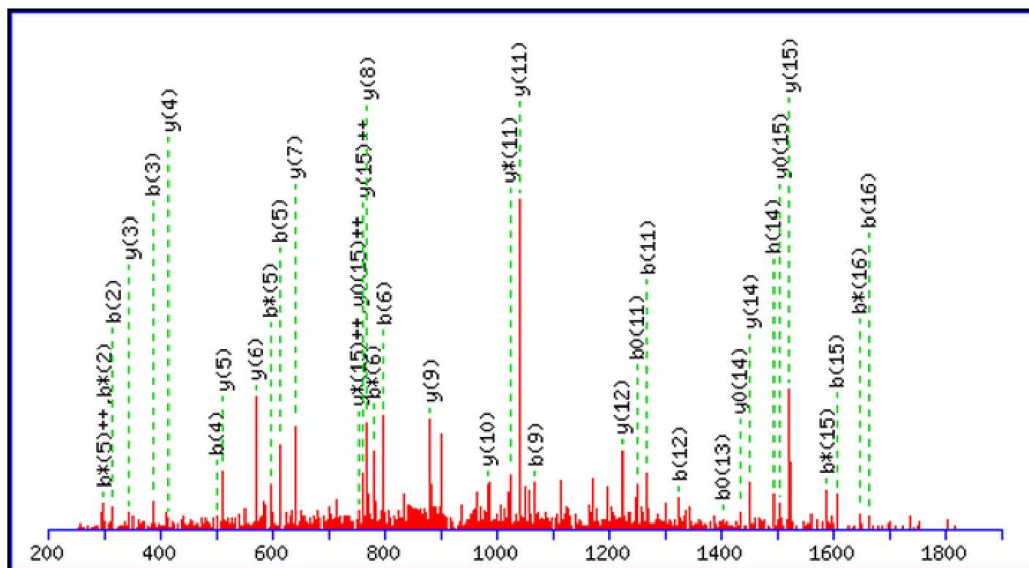

Monoisotopic mass of neutral peptide Mr(calc): 1837.1058

Fixed modifications: Carbamidomethyl (C) (apply to specific)

Variable modifications:

K2 : Propionyl-(13CD3)Methyl (K)

K6 : Propionyl (K)

Ions Score: 67 Expect: 3e-005

Matches : 37/158 fragment ions using 78 most intense peaks

| #  | b                | b <sup>++</sup> | b*               | b <sup>+++</sup> | b <sup>0</sup>   | b <sup>0++</sup> | Seq. | y                | y <sup>++</sup> | y*               | y <sup>+++</sup> | y <sup>0</sup>   | y <sup>0++</sup> | #         |
|----|------------------|-----------------|------------------|------------------|------------------|------------------|------|------------------|-----------------|------------------|------------------|------------------|------------------|-----------|
| 1  | 114.0913         | 57.5493         |                  |                  |                  |                  | L    |                  |                 |                  |                  |                  |                  | 17        |
| 2  | <b>316.2504</b>  | 158.6288        | <b>299.2238</b>  | 150.1155         |                  |                  | K    | 1725.0290        | 863.0181        | 1708.0025        | 854.5049         | 1707.0185        | 854.0129         | <b>16</b> |
| 3  | <b>387.2875</b>  | 194.1474        | 370.2609         | 185.6341         |                  |                  | A    | <b>1522.8700</b> | <b>761.9386</b> | 1505.8435        | <b>753.4254</b>  | <b>1504.8594</b> | <b>752.9334</b>  | <b>15</b> |
| 4  | <b>501.3304</b>  | 251.1688        | 484.3038         | 242.6556         |                  |                  | N    | <b>1451.8329</b> | 726.4201        | 1434.8063        | 717.9068         | <b>1433.8223</b> | 717.4148         | <b>14</b> |
| 5  | <b>614.4145</b>  | 307.7109        | <b>597.3879</b>  | <b>299.1976</b>  |                  |                  | L    | 1337.7900        | 669.3986        | 1320.7634        | 660.8853         | 1319.7794        | 660.3933         | <b>13</b> |
| 6  | <b>798.5356</b>  | 399.7715        | <b>781.5091</b>  | 391.2582         |                  |                  | K    | <b>1224.7059</b> | 612.8566        | 1207.6793        | 604.3433         | 1206.6953        | 603.8513         | <b>12</b> |
| 7  | 855.5571         | 428.2822        | 838.5306         | 419.7689         |                  |                  | G    | <b>1040.5847</b> | 520.7960        | <b>1023.5582</b> | 512.2827         | 1022.5742        | 511.7907         | <b>11</b> |
| 8  | 956.6048         | 478.8060        | 939.5782         | 470.2928         | 938.5942         | 469.8007         | T    | <b>983.5633</b>  | 492.2853        | 966.5367         | 483.7720         | 965.5527         | 483.2800         | <b>10</b> |
| 9  | <b>1069.6888</b> | 535.3481        | 1052.6623        | 526.8348         | 1051.6783        | 526.3428         | L    | <b>882.5156</b>  | 441.7614        | 865.4890         | 433.2482         |                  |                  | 9         |
| 10 | 1197.7474        | 599.3773        | 1180.7209        | 590.8641         | 1179.7369        | 590.3721         | Q    | <b>769.4315</b>  | 385.2194        | 752.4050         | 376.7061         |                  |                  | 8         |
| 11 | <b>1268.7845</b> | 634.8959        | 1251.7580        | 626.3826         | <b>1250.7740</b> | 625.8906         | A    | <b>641.3729</b>  | 321.1901        | 624.3464         | 312.6768         |                  |                  | 7         |
| 12 | <b>1325.8060</b> | 663.4066        | 1308.7795        | 654.8934         | 1307.7954        | 654.4014         | G    | <b>570.3358</b>  | 285.6715        | 553.3093         | 277.1583         |                  |                  | 6         |
| 13 | 1422.8588        | 711.9330        | 1405.8322        | 703.4197         | <b>1404.8482</b> | 702.9277         | P    | <b>513.3144</b>  | 257.1608        | 496.2878         | 248.6475         |                  |                  | 5         |
| 14 | <b>1493.8959</b> | 747.4516        | 1476.8693        | 738.9383         | 1475.8853        | 738.4463         | A    | <b>416.2616</b>  | 208.6344        | 399.2350         | 200.1212         |                  |                  | 4         |
| 15 | <b>1606.9799</b> | 803.9936        | <b>1589.9534</b> | 795.4803         | 1588.9694        | 794.9883         | L    | <b>345.2245</b>  | 173.1159        | 328.1979         | 164.6026         |                  |                  | 3         |
| 16 | <b>1664.0014</b> | 832.5043        | <b>1646.9749</b> | 823.9911         | 1645.9908        | 823.4991         | G    | 232.1404         | 116.5738        | 215.1139         | 108.0606         |                  |                  | 2         |
| 17 |                  |                 |                  |                  |                  |                  | R    | 175.1190         | 88.0631         | 158.0924         | 79.5498          |                  |                  | 1         |

Found in **Q6R954**, Polymerase delta interacting protein 46 OS=Homo sapiens GN=PDIP46 PE=2 SV=1

Match to Query 4700: 1143.687348 from(572.850950,2+) intensity(36830.8047)

Title: File336 Spectrum5985 scans: 7126

Data file \\192.168.1.104\public\raw data\Elite\_01\methylation\_ZW\k562\2013-5-23-K562-Kpropio-methyl-IP-Fr13-ZW.mgf

Click mouse within plot area to zoom in by factor of two about that point

Or, Plot from  to  Da Label all possible matches  Label matches used for scoring 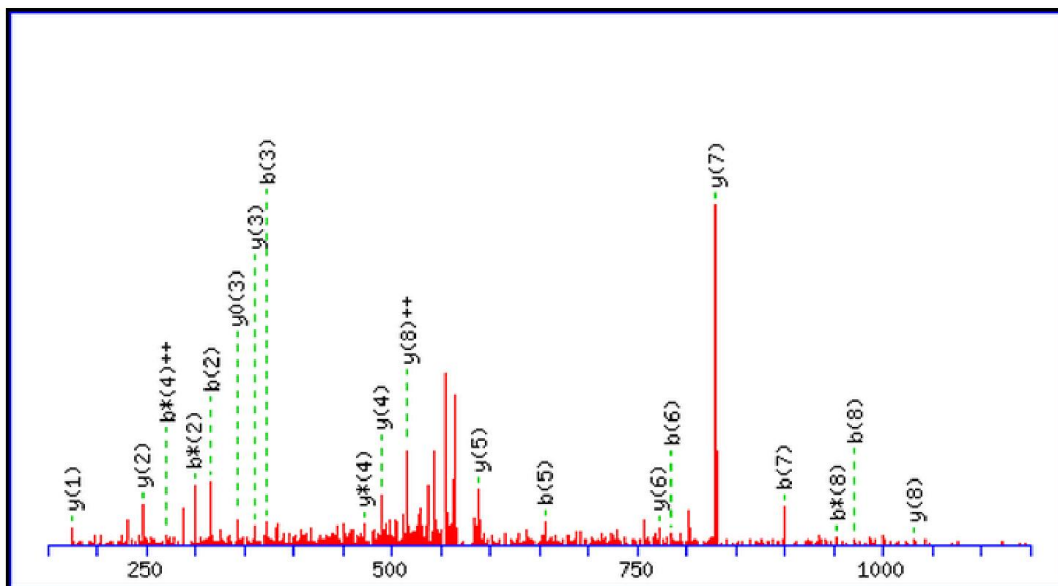

Monoisotopic mass of neutral peptide Mr(calc): 1143.6884

Fixed modifications: Carbamidomethyl (C) (apply to specified residues or termini only)

Variable modifications:

K2 : Propionyl-(13CD3)Methyl (K)

K4 : Propionyl (K)

Ions Score: 28 Expect: 0.41

Matches : 20/78 fragment ions using 7

| # | b               | b <sup>++</sup> | b <sup>*</sup>  | b <sup>*++</sup> | b <sup>0</sup> | b <sup>0++</sup> | Seq. | y                | y <sup>++</sup> | y <sup>*</sup>  | y <sup>*++</sup> | y <sup>0</sup>  | y <sup>0++</sup> | # |
|---|-----------------|-----------------|-----------------|------------------|----------------|------------------|------|------------------|-----------------|-----------------|------------------|-----------------|------------------|---|
| 1 | 114.0913        | 57.5493         |                 |                  |                |                  | I    |                  |                 |                 |                  |                 |                  | 9 |
| 2 | <b>316.2504</b> | 158.6288        | <b>299.2238</b> | 150.1155         |                |                  | K    | <b>1031.6117</b> | <b>516.3095</b> | 1014.5851       | 507.7962         | 1013.6011       | 507.3042         | 8 |
| 3 | <b>373.2718</b> | 187.1395        | 356.2453        | 178.6263         |                |                  | G    | <b>829.4526</b>  | 415.2300        | 812.4261        | 406.7167         | 811.4421        | 406.2247         | 7 |
| 4 | 557.3930        | 279.2001        | 540.3664        | <b>270.6869</b>  |                |                  | K    | <b>772.4312</b>  | 386.7192        | 755.4046        | 378.2060         | 754.4206        | 377.7139         | 6 |
| 5 | <b>656.4614</b> | 328.7343        | 639.4349        | 320.2211         |                |                  | V    | <b>588.3100</b>  | 294.6586        | 571.2835        | 286.1454         | 570.2994        | 285.6534         | 5 |
| 6 | <b>784.5200</b> | 392.7636        | 767.4934        | 384.2504         |                |                  | Q    | <b>489.2416</b>  | 245.1244        | <b>472.2150</b> | 236.6112         | 471.2310        | 236.1191         | 4 |
| 7 | <b>899.5469</b> | 450.2771        | 882.5204        | 441.7638         | 881.5364       | 441.2718         | D    | <b>361.1830</b>  | 181.0951        | 344.1565        | 172.5819         | <b>343.1724</b> | 172.0899         | 3 |
| 8 | <b>970.5840</b> | 485.7957        | <b>953.5575</b> | 477.2824         | 952.5735       | 476.7904         | A    | <b>246.1561</b>  | 123.5817        | 229.1295        | 115.0684         |                 |                  | 2 |
| 9 |                 |                 |                 |                  |                |                  | R    | <b>175.1190</b>  | 88.0631         | 158.0924        | 79.5498          |                 |                  | 1 |

Found in **G3V3N2**, Rho guanine nucleotide exchange factor 40 (Fragment) OS=Homo sapiens GN=ARHGEF40 PE=2 SV=1

Match to Query 31: 705.404568 from(353.709560,2+) intensity(14358.3887)

Title: File336 Spectrum1010 scans: 1533

Data file \\192.168.1.104\public\raw data\Elite\_01\methylation\_ZWk562\2013-5-23-K562-Kpropio-methyl-IP-Fr13-ZW.mgf

Click mouse within plot area to zoom in by factor of two about that point

Or, Plot from  to  Da Label all possible matches  Label matches used for scoring 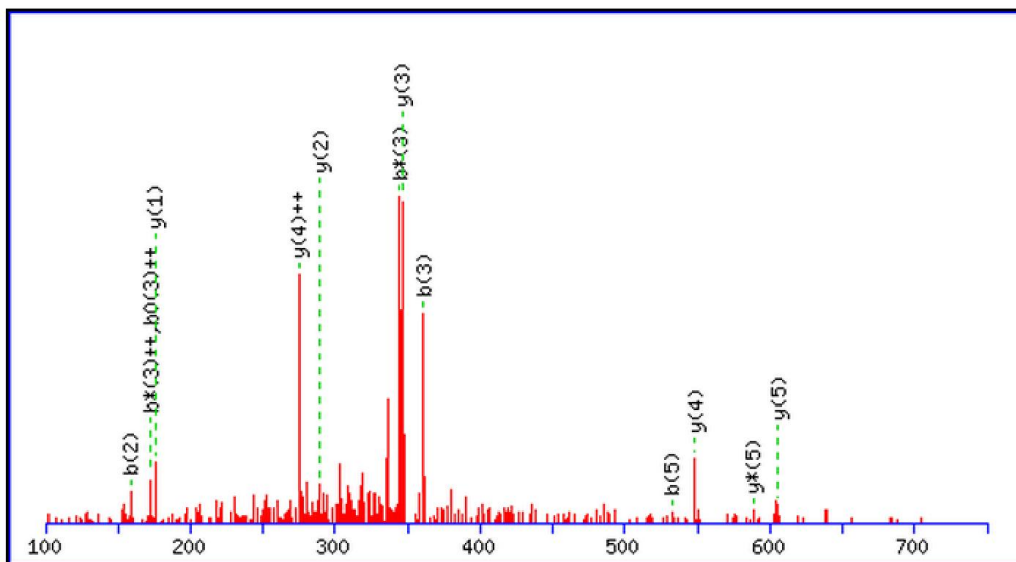

Monoisotopic mass of neutral peptide Mr(calc): 705.4042

Fixed modifications: Carbamidomethyl (C) (apply to specified residues or termini only)

Variable modifications:

K3 : Propionyl-(13CD3)Methyl (K)

Ions Score: 30 Expect: 0.22

Matches : 13/46 fragment ions

| # | b               | b <sup>++</sup> | b <sup>*</sup>  | b <sup>*++</sup> | b <sup>0</sup> | b <sup>0++</sup> | Seq. | y               | y <sup>++</sup> | y <sup>*</sup>  | y <sup>*++</sup> | # |
|---|-----------------|-----------------|-----------------|------------------|----------------|------------------|------|-----------------|-----------------|-----------------|------------------|---|
| 1 | 102.0550        | 51.5311         |                 |                  | 84.0444        | 42.5258          | T    |                 |                 |                 |                  | 6 |
| 2 | <b>159.0764</b> | 80.0418         |                 |                  | 141.0659       | 71.0366          | G    | <b>605.3638</b> | 303.1855        | <b>588.3373</b> | 294.6723         | 5 |
| 3 | <b>361.2354</b> | 181.1214        | <b>344.2089</b> | <b>172.6081</b>  | 343.2249       | <b>172.1161</b>  | K    | <b>548.3424</b> | <b>274.6748</b> | 531.3158        | 266.1615         | 4 |
| 4 | 418.2569        | 209.6321        | 401.2303        | 201.1188         | 400.2463       | 200.6268         | G    | <b>346.1833</b> | 173.5953        | 329.1568        | 165.0820         | 3 |
| 5 | <b>532.2998</b> | 266.6535        | 515.2733        | 258.1403         | 514.2893       | 257.6483         | N    | <b>289.1619</b> | 145.0846        | 272.1353        | 136.5713         | 2 |
| 6 |                 |                 |                 |                  |                |                  | R    | <b>175.1190</b> | 88.0631         | 158.0924        | 79.5498          | 1 |

Found in **Q71DI3**, Histone H3.2 OS=Homo sapiens GN=HIST2H3A PE=1 SV=3

Match to Query 4351: 1115.691008 from(558.852780,2+) intensity(1977045.5000)

Title: File334 Spectrum7582 scans: 8668

Data file \\192.168.1.104\public\raw data\Elite\_01\methylation\_ZW\k562\2013-5-23-K562-Kpropio-methyl-IP-Fr12-ZW.mgf

Click mouse within plot area to zoom in by factor of two about that point

Or,  150 to  Da Label all possible matches  Label matches used for scoring 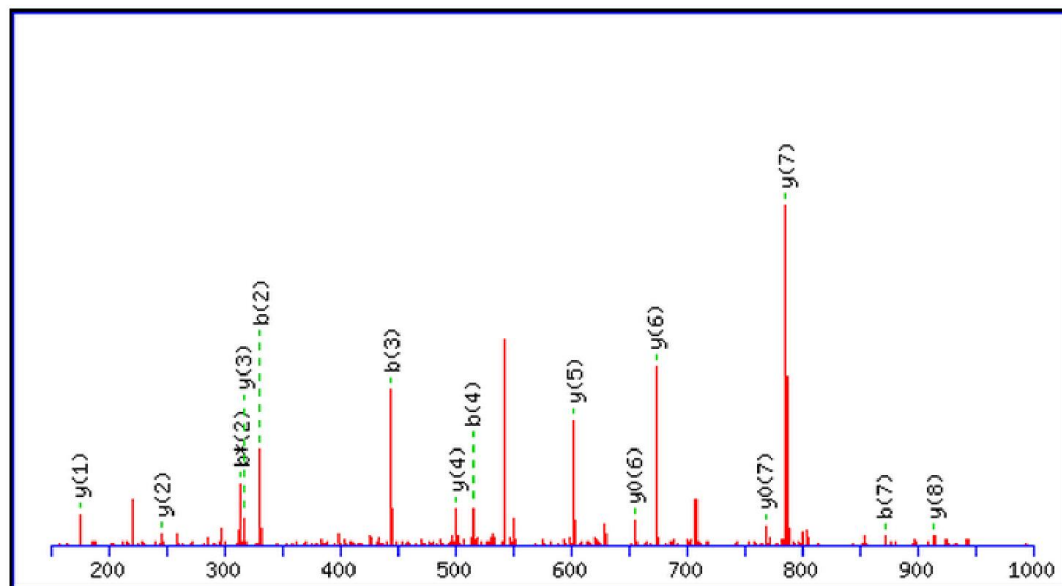

Monoisotopic mass of neutral p

Fixed modifications: Carbamidic

Variable modifications:

K1 : Propionyl-(13CD3)Meth

K6 : Propionyl (K)

Ions Score: 62 Expect: 0.0001

Matches : 15/80 fragment ions

| # | b               | b <sup>++</sup> | b <sup>*</sup>  | b <sup>*++</sup> | b <sup>0</sup> | b <sup>0++</sup> | Seq. | y               | y <sup>++</sup> | y <sup>*</sup> | y <sup>*++</sup> | y <sup>0</sup>  | y <sup>0++</sup> | # |
|---|-----------------|-----------------|-----------------|------------------|----------------|------------------|------|-----------------|-----------------|----------------|------------------|-----------------|------------------|---|
| 1 | 203.1663        | 102.0868        | 186.1397        | 93.5735          |                |                  | K    |                 |                 |                |                  |                 |                  | 9 |
| 2 | <b>331.2249</b> | 166.1161        | <b>314.1983</b> | 157.6028         |                |                  | Q    | <b>914.5418</b> | 457.7745        | 897.5152       | 449.2613         | 896.5312        | 448.7693         | 8 |
| 3 | <b>444.3089</b> | 222.6581        | 427.2824        | 214.1448         |                |                  | L    | <b>786.4832</b> | 393.7452        | 769.4567       | 385.2320         | <b>768.4726</b> | 384.7400         | 7 |
| 4 | <b>515.3460</b> | 258.1767        | 498.3195        | 249.6634         |                |                  | A    | <b>673.3992</b> | 337.2032        | 656.3726       | 328.6899         | <b>655.3886</b> | 328.1979         | 6 |
| 5 | 616.3937        | 308.7005        | 599.3672        | 300.1872         | 598.3832       | 299.6952         | T    | <b>602.3620</b> | 301.6847        | 585.3355       | 293.1714         | 584.3515        | 292.6794         | 5 |
| 6 | 800.5149        | 400.7611        | 783.4884        | 392.2478         | 782.5043       | 391.7558         | K    | <b>501.3144</b> | 251.1608        | 484.2878       | 242.6475         |                 |                  | 4 |
| 7 | <b>871.5520</b> | 436.2796        | 854.5255        | 427.7664         | 853.5415       | 427.2744         | A    | <b>317.1932</b> | 159.1002        | 300.1666       | 150.5870         |                 |                  | 3 |
| 8 | 942.5891        | 471.7982        | 925.5626        | 463.2849         | 924.5786       | 462.7929         | A    | <b>246.1561</b> | 123.5817        | 229.1295       | 115.0684         |                 |                  | 2 |
| 9 |                 |                 |                 |                  |                |                  | R    | <b>175.1190</b> | 88.0631         | 158.0924       | 79.5498          |                 |                  | 1 |

Found in **E9PEI0**, Cell division cycle-associated protein 2 OS=Homo sapiens GN=CDCA2 PE=2 SV=1

Match to Query 14607: 1975.026708 from(988.520630,2+) intensity(55254.6367)

Title: File334 Spectrum10677 scans: 11969

Data file \\192.168.1.104\public\raw data\Elite\_01\methylation\_ZW\k562\2013-5-23-K562-Kpropio-methyl-IP-Fr12-ZW.mgf

Click mouse within plot area to zoom in by factor of two about that point

Or,   to  Da Label all possible matches  Label matches used for scoring 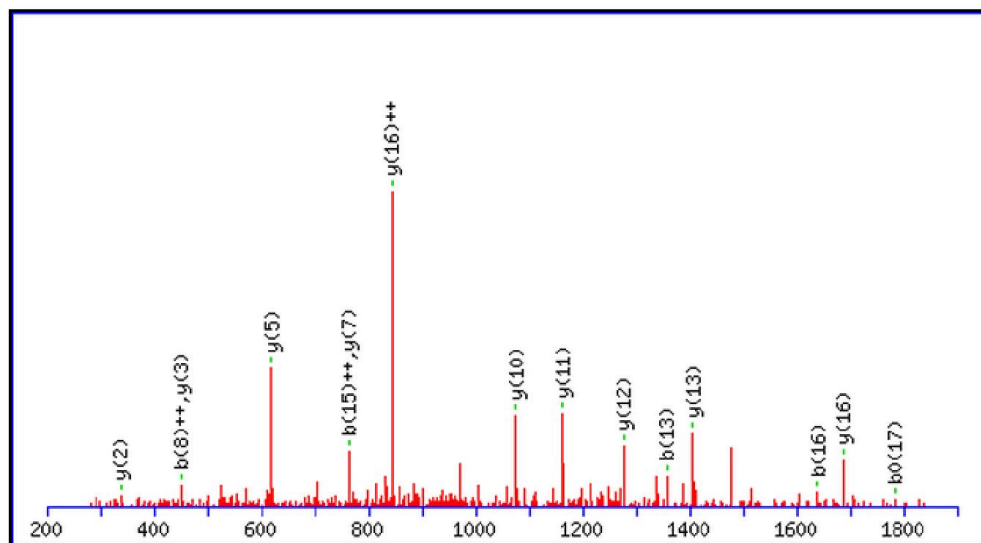

Monoisotopic mass of neutral peptide Mr(calc): 1975.0283

Fixed modifications: Carbamidomethyl (C) (apply to specified

Variable modifications:

K1 : Propionyl-(13CD3)Methyl (K)

Ions Score: 74 Expect: 2.5e-005

Matches : 15/192 fragment ions using 16 most intense peaks

| #  | b                | b <sup>++</sup> | b <sup>*</sup> | b <sup>*++</sup> | b <sup>0</sup>   | b <sup>0++</sup> | Seq. | y                | y <sup>++</sup> | y <sup>*</sup> | y <sup>*++</sup> | y <sup>0</sup> | y <sup>0++</sup> | #  |
|----|------------------|-----------------|----------------|------------------|------------------|------------------|------|------------------|-----------------|----------------|------------------|----------------|------------------|----|
| 1  | 203.1663         | 102.0868        | 186.1397       | 93.5735          |                  |                  | K    |                  |                 |                |                  |                |                  | 18 |
| 2  | 290.1983         | 145.6028        | 273.1718       | 137.0895         | 272.1878         | 136.5975         | S    | 1773.8766        | 887.4419        | 1756.8501      | 878.9287         | 1755.8660      | 878.4367         | 17 |
| 3  | 387.2511         | 194.1292        | 370.2245       | 185.6159         | 369.2405         | 185.1239         | P    | <b>1686.8446</b> | <b>843.9259</b> | 1669.8180      | 835.4127         | 1668.8340      | 834.9206         | 16 |
| 4  | 500.3351         | 250.6712        | 483.3086       | 242.1579         | 482.3246         | 241.6659         | L    | 1589.7918        | 795.3995        | 1572.7653      | 786.8863         | 1571.7812      | 786.3943         | 15 |
| 5  | 571.3723         | 286.1898        | 554.3457       | 277.6765         | 553.3617         | 277.1845         | A    | 1476.7077        | 738.8575        | 1459.6812      | 730.3442         | 1458.6972      | 729.8522         | 14 |
| 6  | 699.4308         | 350.2191        | 682.4043       | 341.7058         | 681.4203         | 341.2138         | Q    | <b>1405.6706</b> | 703.3390        | 1388.6441      | 694.8257         | 1387.6601      | 694.3337         | 13 |
| 7  | 814.4578         | 407.7325        | 797.4312       | 399.2193         | 796.4472         | 398.7272         | D    | <b>1277.6121</b> | 639.3097        | 1260.5855      | 630.7964         | 1259.6015      | 630.3044         | 12 |
| 8  | 901.4898         | <b>451.2485</b> | 884.4633       | 442.7353         | 883.4792         | 442.2433         | S    | <b>1162.5851</b> | 581.7962        | 1145.5586      | 573.2829         | 1144.5745      | 572.7909         | 11 |
| 9  | 998.5426         | 499.7749        | 981.5160       | 491.2616         | 980.5320         | 490.7696         | P    | <b>1075.5531</b> | 538.2802        | 1058.5265      | 529.7669         | 1057.5425      | 529.2749         | 10 |
| 10 | 1085.5746        | 543.2909        | 1068.5481      | 534.7777         | 1067.5640        | 534.2857         | S    | 978.5003         | 489.7538        | 961.4738       | 481.2405         | 960.4898       | 480.7485         | 9  |
| 11 | 1213.6332        | 607.3202        | 1196.6066      | 598.8070         | 1195.6226        | 598.3149         | Q    | 891.4683         | 446.2378        | 874.4417       | 437.7245         | 873.4577       | 437.2325         | 8  |
| 12 | 1270.6546        | 635.8310        | 1253.6281      | 627.3177         | 1252.6441        | 626.8257         | G    | <b>763.4097</b>  | 382.2085        | 746.3832       | 373.6952         | 745.3991       | 373.2032         | 7  |
| 13 | <b>1357.6867</b> | 679.3470        | 1340.6601      | 670.8337         | 1339.6761        | 670.3417         | S    | 706.3883         | 353.6978        | 689.3617       | 345.1845         | 688.3777       | 344.6925         | 6  |
| 14 | 1454.7394        | 727.8734        | 1437.7129      | 719.3601         | 1436.7289        | 718.8681         | P    | <b>619.3562</b>  | 310.1817        | 602.3297       | 301.6685         |                |                  | 5  |
| 15 | 1525.7765        | <b>763.3919</b> | 1508.7500      | 754.8786         | 1507.7660        | 754.3866         | A    | 522.3035         | 261.6554        | 505.2769       | 253.1421         |                |                  | 4  |
| 16 | <b>1638.8606</b> | 819.9339        | 1621.8341      | 811.4207         | 1620.8500        | 810.9287         | L    | <b>451.2663</b>  | 226.1368        | 434.2398       | 217.6235         |                |                  | 3  |
| 17 | 1801.9239        | 901.4656        | 1784.8974      | 892.9523         | <b>1783.9134</b> | 892.4603         | Y    | <b>338.1823</b>  | 169.5948        | 321.1557       | 161.0815         |                |                  | 2  |
| 18 |                  |                 |                |                  |                  |                  | R    | 175.1190         | 88.0631         | 158.0924       | 79.5498          |                |                  | 1  |

Found in **Q5QPL9**, RNA-binding protein Raly (Fragment) OS=Homo sapiens GN=RALY PE=2 SV=1

Match to Query 2907: 995.653608 from(498.834080,2+) intensity(53707.6211)

Title: File334 Spectrum4162 scans: 4987

Data file \\192.168.1.104\public\raw data\Elite\_01\methylation\_ZW\k562\2013-5-23-K562-Kpropio-methyl-IP-Fr12-ZW.mgf

Click mouse within plot area to zoom in by factor of two about that point

Or, Plot from  to  Da Label all possible matches  Label matches used for scoring 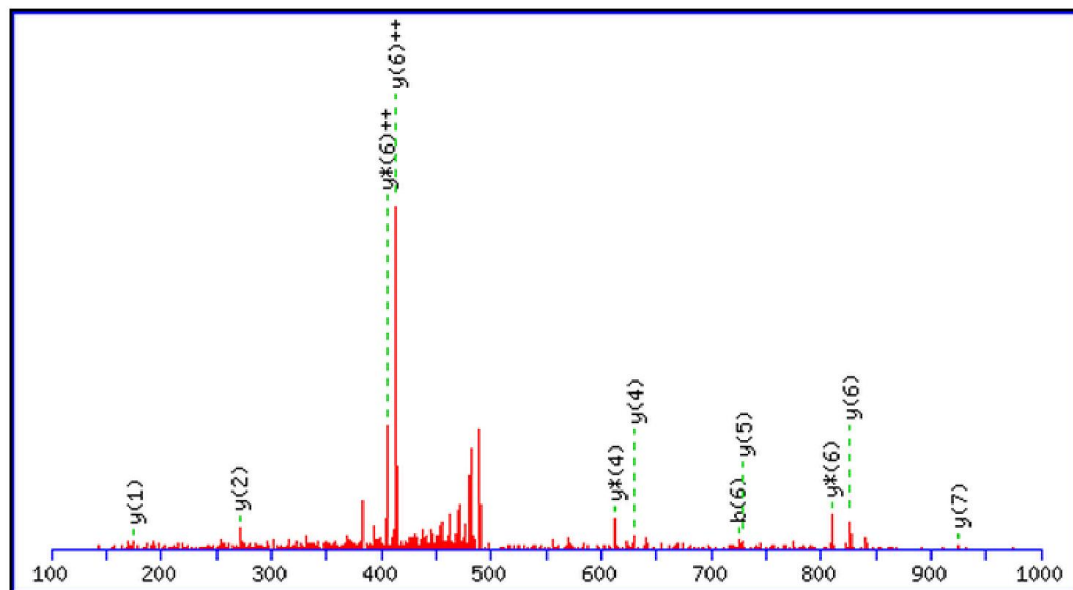

Monoisotopic mass of neutral peptide Mr(calc):

Fixed modifications: Carbamidomethyl (C) (appl)

Variable modifications:

K5 : Propionyl-(13CD3)Methyl (K)

Ions Score: 40 Expect: 0.0079

Matches : 11/48 fragment ions using 17 most in

| # | b               | b <sup>++</sup> | b*       | b <sup>*++</sup> | Seq. | y               | y <sup>++</sup> | y*              | y <sup>*++</sup> | # |
|---|-----------------|-----------------|----------|------------------|------|-----------------|-----------------|-----------------|------------------|---|
| 1 | 72.0444         | 36.5258         |          |                  | A    |                 |                 |                 |                  | 8 |
| 2 | 171.1128        | 86.0600         |          |                  | V    | <b>925.6214</b> | 463.3144        | 908.5949        | 454.8011         | 7 |
| 3 | 268.1656        | 134.5864        |          |                  | P    | <b>826.5530</b> | <b>413.7801</b> | <b>809.5265</b> | <b>405.2669</b>  | 6 |
| 4 | 367.2340        | 184.1206        |          |                  | V    | <b>729.5003</b> | 365.2538        | 712.4737        | 356.7405         | 5 |
| 5 | 569.3930        | 285.2001        | 552.3664 | 276.6869         | K    | <b>630.4318</b> | 315.7196        | <b>613.4053</b> | 307.2063         | 4 |
| 6 | <b>725.4941</b> | 363.2507        | 708.4676 | 354.7374         | R    | 428.2728        | 214.6401        | 411.2463        | 206.1268         | 3 |
| 7 | 822.5469        | 411.7771        | 805.5203 | 403.2638         | P    | <b>272.1717</b> | 136.5895        | 255.1452        | 128.0762         | 2 |
| 8 |                 |                 |          |                  | R    | <b>175.1190</b> | 88.0631         | 158.0924        | 79.5498          | 1 |

Found in **M0QXA7**, Protein Wiz OS=Homo sapiens GN=WIZ PE=4 SV=1

Match to Query 3620: 1052.628028 from(527.321290,2+) intensity(202455.3750)

Title: File334 Spectrum13253 scans: 14717

Data file \\192.168.1.104\public\raw data\Elite\_01\methylation\_ZW\k562\2013-5-23-K562-Kpropio-methyl-IP-Fr12-ZW.mgf

Click mouse within plot area to zoom in by factor of two about that point

Or, Plot from  to  Da Label all possible matches  Label matches used for scoring 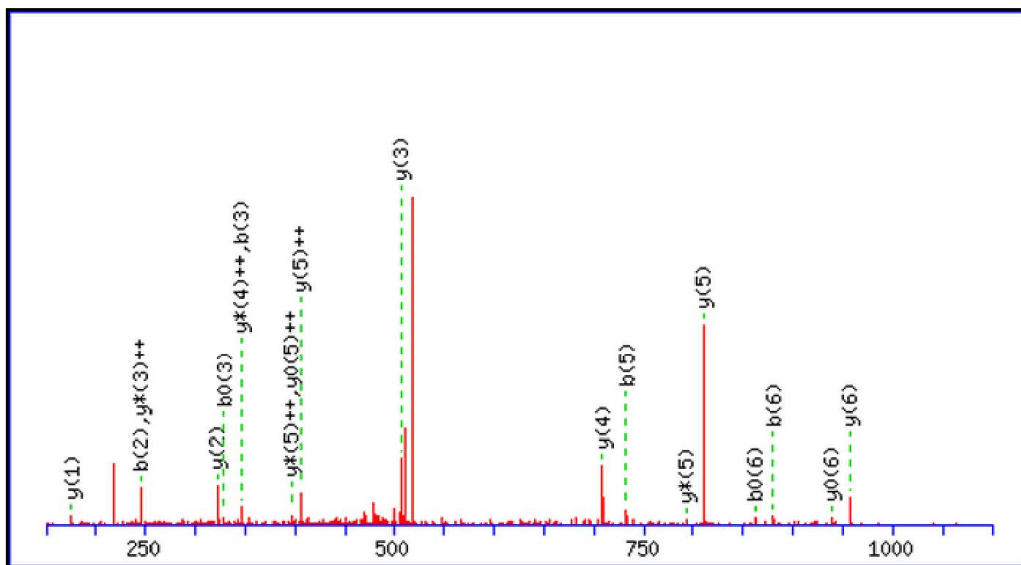

Monoisotopic mass of neutral peptide Mr(calc): 1052.6291

Fixed modifications: Carbamidomethyl (C) (apply to specified residues or termini only)

Variable modifications:

K4 : Propionyl-(13CD3)Methyl (K)

K5 : Propionyl (K)

Ions Score: 42 Expect: 0.0

Matches : 19/54 fragment id

| # | b               | b <sup>++</sup> | b <sup>*</sup> | b <sup>***</sup> | b <sup>0</sup>  | b <sup>0++</sup> | Seq. | y               | y <sup>++</sup> | y <sup>*</sup>  | y <sup>***</sup> | y <sup>0</sup>  | y <sup>0++</sup> | # |
|---|-----------------|-----------------|----------------|------------------|-----------------|------------------|------|-----------------|-----------------|-----------------|------------------|-----------------|------------------|---|
| 1 | 98.0600         | 49.5337         |                |                  |                 |                  | P    |                 |                 |                 |                  |                 |                  | 7 |
| 2 | <b>245.1285</b> | 123.0679        |                |                  |                 |                  | F    | <b>956.5837</b> | 478.7955        | 939.5571        | 470.2822         | <b>938.5731</b> | 469.7902         | 6 |
| 3 | <b>346.1761</b> | 173.5917        |                |                  | <b>328.1656</b> | 164.5864         | T    | <b>809.5152</b> | <b>405.2613</b> | <b>792.4887</b> | <b>396.7480</b>  | 791.5047        | <b>396.2560</b>  | 5 |
| 4 | 548.3351        | 274.6712        | 531.3086       | 266.1579         | 530.3246        | 265.6659         | K    | <b>708.4676</b> | 354.7374        | 691.4410        | <b>346.2241</b>  |                 |                  | 4 |
| 5 | <b>732.4563</b> | 366.7318        | 715.4298       | 358.2185         | 714.4458        | 357.7265         | K    | <b>506.3085</b> | 253.6579        | 489.2820        | <b>245.1446</b>  |                 |                  | 3 |
| 6 | <b>879.5247</b> | 440.2660        | 862.4982       | 431.7527         | <b>861.5142</b> | 431.2607         | F    | <b>322.1874</b> | 161.5973        | 305.1608        | 153.0840         |                 |                  | 2 |
| 7 |                 |                 |                |                  |                 |                  | R    | <b>175.1190</b> | 88.0631         | 158.0924        | 79.5498          |                 |                  | 1 |

Found in **K7EJ74**, 116 kDa U5 small nuclear ribonucleoprotein component (Fragment) OS=Homo sapiens GN=EFTUD2 PE=4 SV=1

Match to Query 11999: 1681.849088 from(841.931820,2+) intensity(221610.8125)

Title: File334 Spectrum18414 scans: 20231

Data file \\192.168.1.104\public\raw data\Elite\_01\methylation\_ZW\k562\2013-5-23-K562-Kpropio-methyl-IP-Fr12-ZW.mgf

Click mouse within plot area to zoom in by factor of two about that point

Or,  to  Da Label all possible matches  Label matches used for scoring 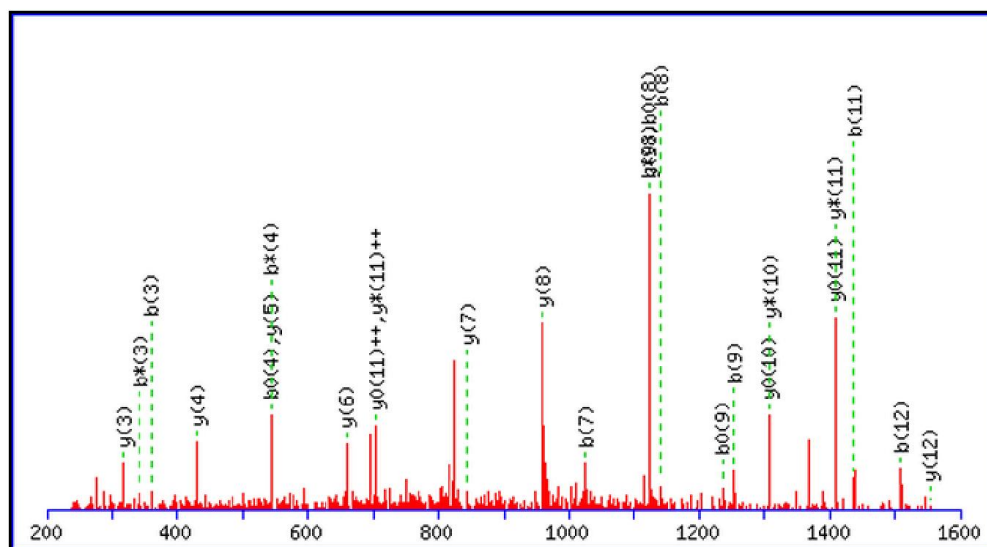

Monoisotopic mass of neutral peptide Mr(calc): 1681.8584

Fixed modifications: Carbamidomethyl (C) (apply)

Variable modifications:

K4 : Propionyl-(13CD3)Methyl (K)

Ions Score: 51 Expect: 0.0036

Matches : 26/132 fragment ions using 42 most in

| #  | b                | b <sup>++</sup> | b*               | b <sup>+++</sup> | b <sup>0</sup>   | b <sup>0++</sup> | Seq. | y                | y <sup>++</sup> | y*               | y <sup>+++</sup> | y <sup>0</sup>   | y <sup>0++</sup> | #  |
|----|------------------|-----------------|------------------|------------------|------------------|------------------|------|------------------|-----------------|------------------|------------------|------------------|------------------|----|
| 1  | 130.0499         | 65.5286         |                  |                  | 112.0393         | 56.5233          | E    |                  |                 |                  |                  |                  |                  | 13 |
| 2  | 258.1084         | 129.5579        | 241.0819         | 121.0446         | 240.0979         | 120.5526         | Q    | <b>1553.8231</b> | 777.4152        | 1536.7966        | 768.9019         | 1535.8125        | 768.4099         | 12 |
| 3  | <b>359.1561</b>  | 180.0817        | <b>342.1296</b>  | 171.5684         | 341.1456         | 171.0764         | T    | 1425.7645        | 713.3859        | <b>1408.7380</b> | <b>704.8726</b>  | <b>1407.7540</b> | <b>704.3806</b>  | 11 |
| 4  | 561.3151         | 281.1612        | <b>544.2886</b>  | 272.6479         | <b>543.3046</b>  | 272.1559         | K    | 1324.7168        | 662.8621        | <b>1307.6903</b> | 654.3488         | <b>1306.7063</b> | 653.8568         | 10 |
| 5  | 724.3785         | 362.6929        | 707.3519         | 354.1796         | 706.3679         | 353.6876         | Y    | <b>1122.5578</b> | 561.7826        | 1105.5313        | 553.2693         | 1104.5473        | 552.7773         | 9  |
| 6  | 839.4054         | 420.2063        | 822.3789         | 411.6931         | 821.3948         | 411.2011         | D    | <b>959.4945</b>  | 480.2509        | 942.4680         | 471.7376         | 941.4839         | 471.2456         | 8  |
| 7  | <b>1025.4847</b> | 513.2460        | 1008.4582        | 504.7327         | 1007.4742        | 504.2407         | W    | <b>844.4676</b>  | 422.7374        | 827.4410         | 414.2241         | 826.4570         | 413.7321         | 7  |
| 8  | <b>1140.5117</b> | 570.7595        | <b>1123.4851</b> | 562.2462         | <b>1122.5011</b> | 561.7542         | D    | <b>658.3883</b>  | 329.6978        | 641.3617         | 321.1845         | 640.3777         | 320.6925         | 6  |
| 9  | <b>1253.5957</b> | 627.3015        | 1236.5692        | 618.7882         | <b>1235.5852</b> | 618.2962         | L    | <b>543.3613</b>  | 272.1843        | 526.3348         | 263.6710         |                  |                  | 5  |
| 10 | 1366.6798        | 683.8435        | 1349.6532        | 675.3303         | 1348.6692        | 674.8383         | L    | <b>430.2772</b>  | 215.6423        | 413.2507         | 207.1290         |                  |                  | 4  |
| 11 | <b>1437.7169</b> | 719.3621        | 1420.6904        | 710.8488         | 1419.7063        | 710.3568         | A    | <b>317.1932</b>  | 159.1002        | 300.1666         | 150.5870         |                  |                  | 3  |
| 12 | <b>1508.7540</b> | 754.8806        | 1491.7275        | 746.3674         | 1490.7435        | 745.8754         | A    | 246.1561         | 123.5817        | 229.1295         | 115.0684         |                  |                  | 2  |
| 13 |                  |                 |                  |                  |                  |                  | R    | 175.1190         | 88.0631         | 158.0924         | 79.5498          |                  |                  | 1  |



Found in **H3BNWO**, THUMP domain-containing protein 1 OS=Homo sapiens GN=THUMP1 PE=2 SV=1

Match to Query 7748: 1446.883888 from(724.449220, 2+) intensity(452856.6563)

Title: File371 Spectrum9510 scans: 11544

Data file \\192.168.1.104\public\raw data\Elite\_01\methylation\_ZW\k562\2013-5-15-562-Kpropio-methyl-IP-Fri-ZW.mgf

Click mouse within plot area to zoom in by factor of two about that point

Or,   to  Da Label all possible matches  Label matches used for scoring 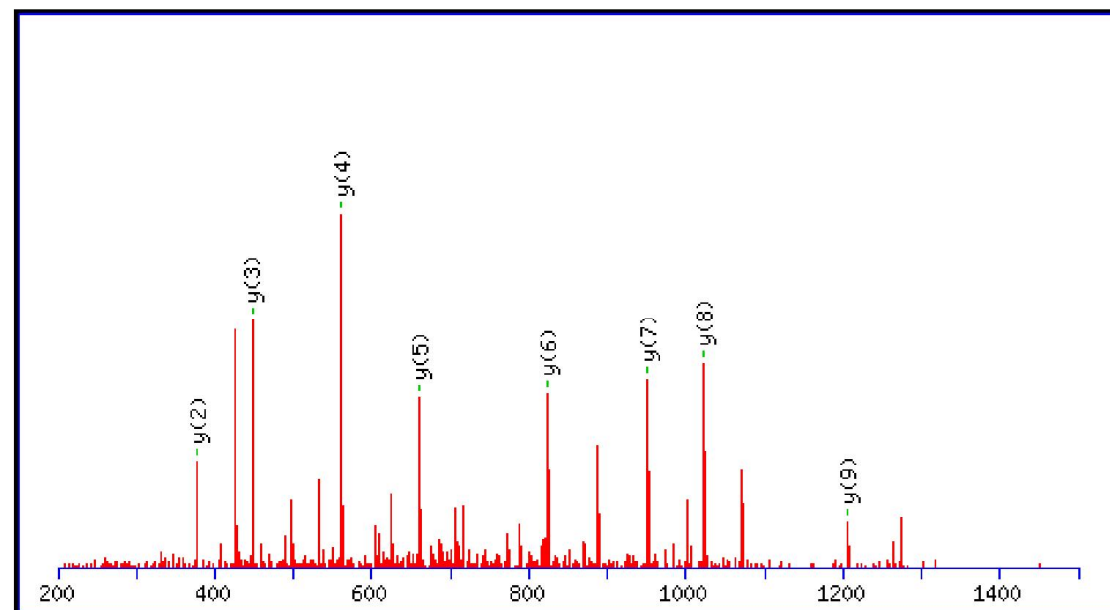**Monoisotopic mass of neutral peptide Mr(calc):** 1446.8831**Fixed modifications:** Carbamidomethyl (C) (apply to specified residues or**Variable modifications:****K1** : Propionyl (K)**K3** : Propionyl (K)**K10** : Propionyl-(13CD3)Methyl (K)**Ions Score:** 67 **Expect:** 4e-005**Matches** : 8/80 fragment ions using 12 most intense peaks (hel'n)

| #  | b         | b <sup>++</sup> | b <sup>+</sup> | b <sup>+++</sup> | Seq. | y                | y <sup>++</sup> | y <sup>+</sup> | y <sup>+++</sup> | #  |
|----|-----------|-----------------|----------------|------------------|------|------------------|-----------------|----------------|------------------|----|
| 1  | 185.1285  | 93.0679         | 168.1019       | 84.5546          | K    |                  |                 |                |                  | 11 |
| 2  | 242.1499  | 121.5786        | 225.1234       | 113.0653         | G    | 1263.7692        | 632.3882        | 1246.7427      | 623.8750         | 10 |
| 3  | 426.2711  | 213.6392        | 409.2445       | 205.1259         | K    | <b>1206.7478</b> | 603.8775        | 1189.7212      | 595.3642         | 9  |
| 4  | 497.3082  | 249.1577        | 480.2817       | 240.6445         | A    | <b>1022.6266</b> | 511.8169        | 1005.6000      | 503.3037         | 8  |
| 5  | 625.3668  | 313.1870        | 608.3402       | 304.6738         | Q    | <b>951.5895</b>  | 476.2984        | 934.5629       | 467.7851         | 7  |
| 6  | 788.4301  | 394.7187        | 771.4036       | 386.2054         | Y    | <b>823.5309</b>  | 412.2691        | 806.5043       | 403.7558         | 6  |
| 7  | 887.4985  | 444.2529        | 870.4720       | 435.7396         | V    | <b>660.4676</b>  | 330.7374        | 643.4410       | 322.2241         | 5  |
| 8  | 1000.5826 | 500.7949        | 983.5560       | 492.2817         | L    | <b>561.3991</b>  | 281.2032        | 544.3726       | 272.6899         | 4  |
| 9  | 1071.6197 | 536.3135        | 1054.5932      | 527.8002         | A    | <b>448.3151</b>  | 224.6612        | 431.2885       | 216.1479         | 3  |
| 10 | 1273.7787 | 637.3930        | 1256.7522      | 628.8797         | K    | <b>377.2780</b>  | 189.1426        | 360.2514       | 180.6293         | 2  |
| 11 |           |                 |                |                  | R    | 175.1190         | 88.0631         | 158.0924       | 79.5498          | 1  |

Found in **Q96QE3**, ATPase family AAA domain-containing protein 5 OS=Homo sapiens GN=ATAD5 PE=1 SV=4

Match to Query 6217: 1316.743868 from(659.379210,2+) intensity(37110.5195)

Title: File371 Spectrum13424 scans: 16061

Data file \\192.168.1.104\public\raw data\Elite\_01\methylation\_ZWk562\2013-5-15-562-Kpropio-methyl-IP-Fr1-ZW.mgf

Click mouse within plot area to zoom in by factor of two about that point

Or,  100 to 1400 Da Label all possible matches  Label matches used for scoring 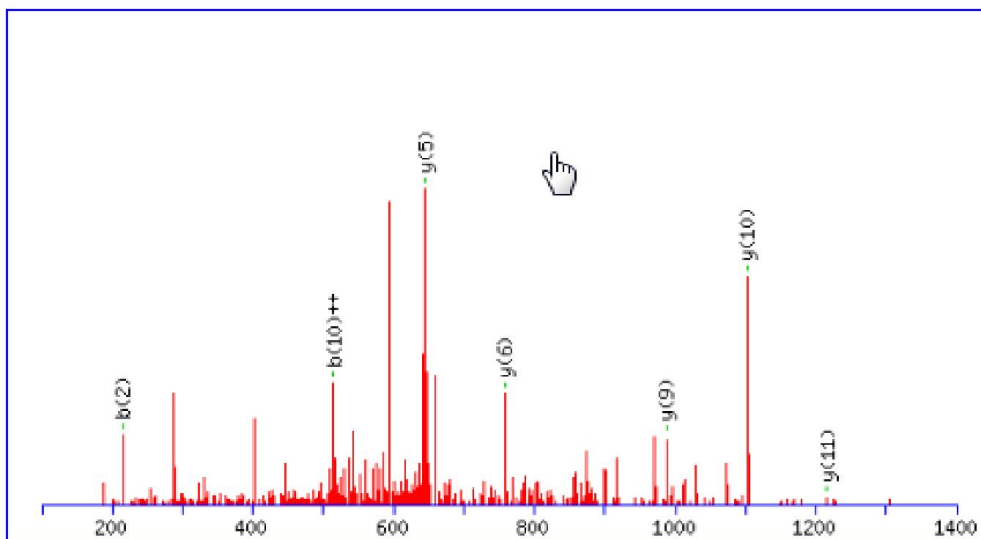

Monoisotopic mass of neutral peptide Mr(calc): 1315.7368

Fixed modifications: Carbamidomethyl (C) (apply to specified residues or termini only)

Variable modifications:

K10 : Propionyl-(13CD3)Methyl (K)

Ions Score: 22 Expect: 2.7

Matches : 7/98 fragment ions using 12 most intense peaks

| #                  | b               | b <sup>++</sup> | b <sup>+</sup> | b <sup>+++</sup> | b <sup>0</sup> | b <sup>0++</sup> | Seq.     | y                | y <sup>++</sup> | y <sup>+</sup> | y <sup>+++</sup> | y <sup>0</sup> | y <sup>0++</sup> | #                  |
|--------------------|-----------------|-----------------|----------------|------------------|----------------|------------------|----------|------------------|-----------------|----------------|------------------|----------------|------------------|--------------------|
| <a href="#">1</a>  | 102.0550        | 51.5311         |                |                  | 84.0444        | 42.5258          | <b>T</b> |                  |                 |                |                  |                |                  | <a href="#">12</a> |
| <a href="#">2</a>  | <b>215.1390</b> | 108.0731        |                |                  | 197.1285       | 99.0679          | <b>L</b> | <b>1215.6964</b> | 608.3519        | 1198.6699      | 599.8386         | 1197.6859      | 599.3466         | <a href="#">11</a> |
| <a href="#">3</a>  | 330.1660        | 165.5866        |                |                  | 312.1554       | 156.5813         | <b>D</b> | <b>1102.6124</b> | 551.8098        | 1085.5858      | 543.2966         | 1084.6018      | 542.8045         | <a href="#">10</a> |
| <a href="#">4</a>  | 431.2136        | 216.1105        |                |                  | 413.2031       | 207.1052         | <b>T</b> | <b>987.5854</b>  | 494.2964        | 970.5589       | 485.7831         | 969.5749       | 485.2911         | <a href="#">9</a>  |
| <a href="#">5</a>  | 488.2351        | 244.6212        |                |                  | 470.2245       | 235.6159         | <b>G</b> | 886.5378         | 443.7725        | 869.5112       | 435.2592         |                |                  | <a href="#">8</a>  |
| <a href="#">6</a>  | 559.2722        | 280.1397        |                |                  | 541.2617       | 271.1345         | <b>A</b> | 829.5163         | 415.2618        | 812.4897       | 406.7485         |                |                  | <a href="#">7</a>  |
| <a href="#">7</a>  | 672.3563        | 336.6818        |                |                  | 654.3457       | 327.6765         | <b>I</b> | <b>758.4792</b>  | 379.7432        | 741.4526       | 371.2300         |                |                  | <a href="#">6</a>  |
| <a href="#">8</a>  | 769.4090        | 385.2082        |                |                  | 751.3985       | 376.2029         | <b>P</b> | <b>645.3951</b>  | 323.2012        | 628.3686       | 314.6879         |                |                  | <a href="#">5</a>  |
| <a href="#">9</a>  | 826.4305        | 413.7189        |                |                  | 808.4199       | 404.7136         | <b>G</b> | 548.3424         | 274.6748        | 531.3158       | 266.1615         |                |                  | <a href="#">4</a>  |
| <a href="#">10</a> | 1028.5895       | <b>514.7984</b> | 1011.5630      | 506.2851         | 1010.5790      | 505.7931         | <b>K</b> | 491.3209         | 246.1641        | 474.2943       | 237.6508         |                |                  | <a href="#">3</a>  |
| <a href="#">11</a> | 1142.6325       | 571.8199        | 1125.6059      | 563.3066         | 1124.6219      | 562.8146         | <b>N</b> | 289.1619         | 145.0846        | 272.1353       | 136.5713         |                |                  | <a href="#">2</a>  |
| <a href="#">12</a> |                 |                 |                |                  |                |                  | <b>R</b> | 175.1190         | 88.0631         | 158.0924       | 79.5498          |                |                  | <a href="#">1</a>  |

Found in **Q92797**, Symplekin OS=Homo sapiens GN=SYMPK PE=1 SV=2

Match to Query 3998: 1185.735928 from(593.875240, 2+) intensity(417987.9063)

Title: File305 Spectrum7285 scans: 8952

Data file \\192.168.1.104\public\raw data\Elite\_01\methylation\_ZW\k562\2013-5-23-K562-Kpropio-methyl-IP-Fr11-ZW.mgf

Click mouse within plot area to zoom in by factor of two about that point

Or,   to  Da Label all possible matches  Label matches used for scoring 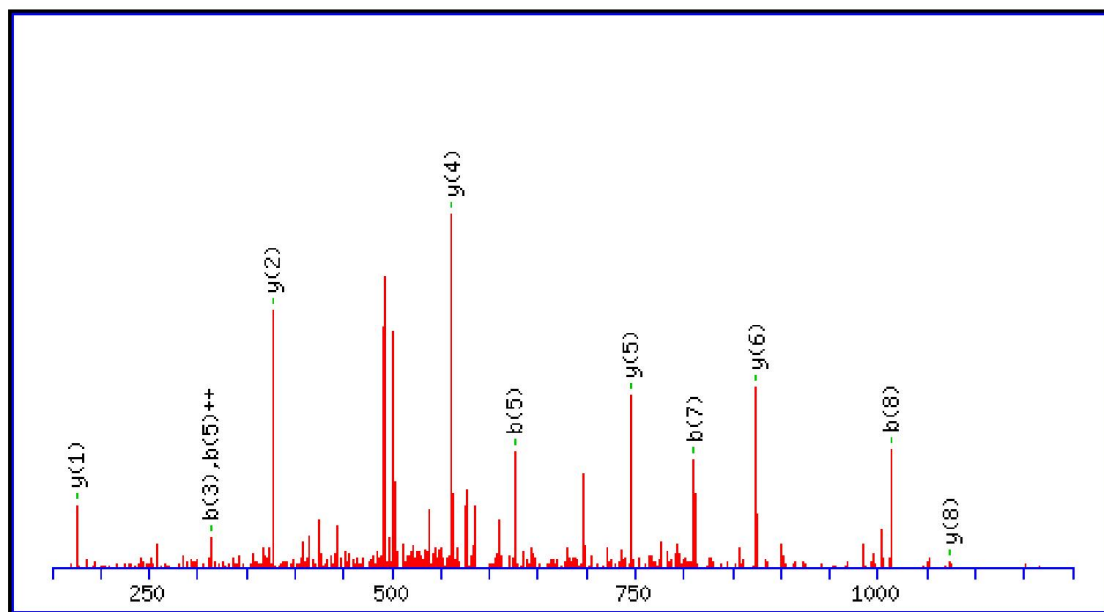**Monoisotopic mass of neutral peptide Mr(calc):** 1185.7354**Fixed modifications:** Carbamidomethyl (C) (apply to specified residues or termini only)**Variable modifications:****K5** : Propionyl (K)**K8** : Propionyl-(13CD3)Methyl (K)**Ions Score:** 60 **Expect:** 0.00018**Matches** : 11/76 fragment ions using 10 most intens

| # | b                | b <sup>++</sup> | b <sup>+</sup> | b <sup>*++</sup> | b <sup>0</sup> | b <sup>0++</sup> | Seq. | y                | y <sup>++</sup> | y <sup>+</sup> | y <sup>*++</sup> | y <sup>0</sup> | y <sup>0++</sup> | # |
|---|------------------|-----------------|----------------|------------------|----------------|------------------|------|------------------|-----------------|----------------|------------------|----------------|------------------|---|
| 1 | 114.0913         | 57.5493         |                |                  |                |                  | L    |                  |                 |                |                  |                |                  | 9 |
| 2 | 185.1285         | 93.0679         |                |                  |                |                  | A    | <b>1073.6586</b> | 537.3329        | 1056.6321      | 528.8197         | 1055.6480      | 528.3277         | 8 |
| 3 | <b>313.1870</b>  | 157.0972        | 296.1605       | 148.5839         |                |                  | Q    | 1002.6215        | 501.8144        | 985.5949       | 493.3011         | 984.6109       | 492.8091         | 7 |
| 4 | 442.2296         | 221.6185        | 425.2031       | 213.1052         | 424.2191       | 212.6132         | E    | <b>874.5629</b>  | 437.7851        | 857.5364       | 429.2718         | 856.5523       | 428.7798         | 6 |
| 5 | <b>626.3508</b>  | <b>313.6790</b> | 609.3243       | 305.1658         | 608.3402       | 304.6738         | K    | <b>745.5203</b>  | 373.2638        | 728.4938       | 364.7505         |                |                  | 5 |
| 6 | 697.3879         | 349.1976        | 680.3614       | 340.6843         | 679.3774       | 340.1923         | A    | <b>561.3991</b>  | 281.2032        | 544.3726       | 272.6899         |                |                  | 4 |
| 7 | <b>810.4720</b>  | 405.7396        | 793.4454       | 397.2264         | 792.4614       | 396.7343         | L    | 490.3620         | 245.6847        | 473.3355       | 237.1714         |                |                  | 3 |
| 8 | <b>1012.6310</b> | 506.8191        | 995.6044       | 498.3059         | 994.6204       | 497.8139         | K    | <b>377.2780</b>  | 189.1426        | 360.2514       | 180.6293         |                |                  | 2 |
| 9 |                  |                 |                |                  |                |                  | R    | <b>175.1190</b>  | 88.0631         | 158.0924       | 79.5498          |                |                  | 1 |

Found in **P17066**, Heat shock 70 kDa protein 6 OS=Homo sapiens GN=HSPA6 PE=1 SV=2

Match to Query 4381: 1230.647188 from(616.330870,2+) intensity(56340.2852)

Title: File305 Spectrum3589 scans: 4953

Data file \\192.168.1.104\public\raw data\Elite\_01\methylation\_ZW\k562\2013-5-23-K562-Kpropio-methyl-IP-Fr11-ZW.mgf

Click mouse within plot area to zoom in by factor of two about that point

Or, Plot from  to  Da Label all possible matches  Label matches used for scoring 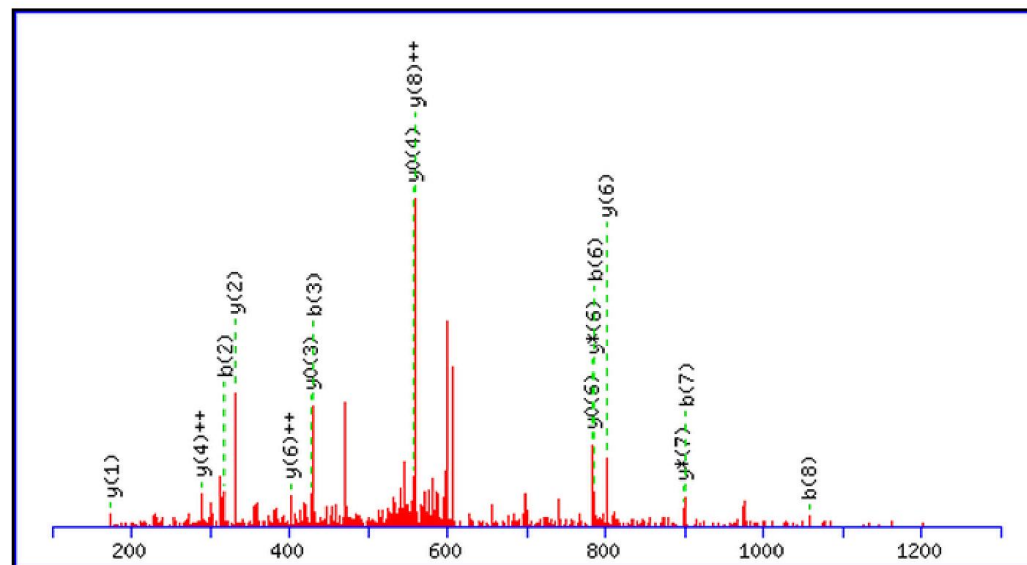

Monoisotopic mass of neutral peptide Mr(calc): 1230.6477

Fixed modifications: Carbamidomethyl (C) (apply to specified residues or termini only)

Variable modifications:

K2 : Propionyl-(13CD3)Methyl (F)

Ions Score: 21 Expect: 3.2

Matches : 16/90 fragment ions using

| # | b                | b <sup>++</sup> | b*        | b <sup>+++</sup> | b <sup>0</sup> | b <sup>0++</sup> | Seq. | y               | y <sup>++</sup> | y*              | y <sup>+++</sup> | y <sup>0</sup>  | y <sup>0++</sup> | # |
|---|------------------|-----------------|-----------|------------------|----------------|------------------|------|-----------------|-----------------|-----------------|------------------|-----------------|------------------|---|
| 1 | 116.0342         | 58.5207         |           |                  | 98.0237        | 49.5155          | D    |                 |                 |                 |                  |                 |                  | 9 |
| 2 | <b>318.1932</b>  | 159.6003        | 301.1667  | 151.0870         | 300.1827       | 150.5950         | K    | 1116.6280       | <b>558.8177</b> | 1099.6015       | 550.3044         | 1098.6175       | 549.8124         | 8 |
| 3 | <b>431.2773</b>  | 216.1423        | 414.2507  | 207.6290         | 413.2667       | 207.1370         | I    | 914.4690        | 457.7381        | <b>897.4425</b> | 449.2249         | 896.4585        | 448.7329         | 7 |
| 4 | 528.3301         | 264.6687        | 511.3035  | 256.1554         | 510.3195       | 255.6634         | P    | <b>801.3850</b> | <b>401.1961</b> | <b>784.3584</b> | 392.6828         | <b>783.3744</b> | 392.1908         | 6 |
| 5 | 657.3727         | 329.1900        | 640.3461  | 320.6767         | 639.3621       | 320.1847         | E    | 704.3322        | 352.6697        | 687.3056        | 344.1565         | 686.3216        | 343.6645         | 5 |
| 6 | <b>786.4152</b>  | 393.7113        | 769.3887  | 385.1980         | 768.4047       | 384.7060         | E    | 575.2896        | <b>288.1484</b> | 558.2630        | 279.6352         | <b>557.2790</b> | 279.1432         | 4 |
| 7 | <b>901.4422</b>  | 451.2247        | 884.4156  | 442.7115         | 883.4316       | 442.2195         | D    | 446.2470        | 223.6271        | 429.2205        | 215.1139         | <b>428.2364</b> | 214.6219         | 3 |
| 8 | <b>1057.5433</b> | 529.2753        | 1040.5168 | 520.7620         | 1039.5327      | 520.2700         | R    | <b>331.2201</b> | 166.1137        | 314.1935        | 157.6004         |                 |                  | 2 |
| 9 |                  |                 |           |                  |                |                  | R    | <b>175.1190</b> | 88.0631         | 158.0924        | 79.5498          |                 |                  | 1 |

Found in **B4DY99**, Coiled-coil domain-containing protein 86 OS=Homo sapiens GN=CCDC86 PE=2 SV=1

Match to Query 2652: 1056.689548 from(529.352050,2+) intensity(65551.0859)

Title: File305 Spectrum6197 scans: 7791

Data file \\192.168.1.104\public\raw data\Elite\_01\methylation\_ZW\k562\2013-5-23-K562-Kpropio-methyl-IP-Fr11-ZW.mgf

Click mouse within plot area to zoom in by factor of two about that point

Or, Plot from  to  Da Label all possible matches  Label matches used for scoring 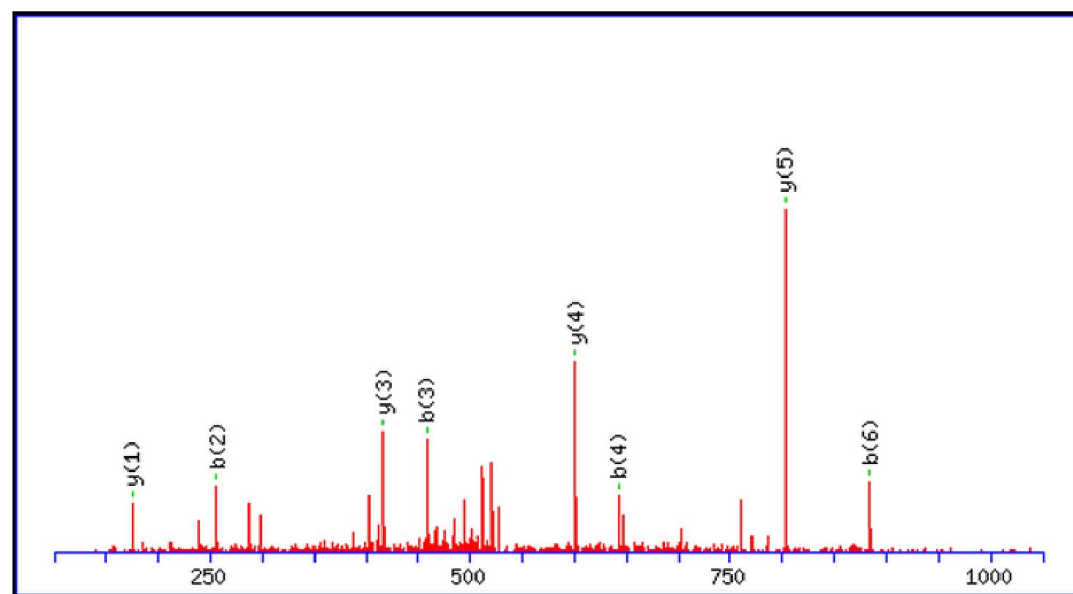

Monoisotopic mass of neutral peptide Mr(calc): 1056.6928

Fixed modifications: Carbamidomethyl (C) (apply

Variable modifications:

K2 : Propionyl (K)

K3 : Propionyl-(13CD3)Methyl (K)

K4 : Propionyl (K)

Ions Score: 35 Expect: 0.025

Matches : 8/46 fragment ions using 9 most intens

| # | b               | b <sup>++</sup> | b <sup>*</sup> | b <sup>***</sup> | Seq. | y               | y <sup>++</sup> | y <sup>*</sup> | y <sup>***</sup> | # |
|---|-----------------|-----------------|----------------|------------------|------|-----------------|-----------------|----------------|------------------|---|
| 1 | 72.0444         | 36.5258         |                |                  | A    |                 |                 |                |                  | 7 |
| 2 | <b>256.1656</b> | 128.5864        | 239.1390       | 120.0731         | K    | 986.6630        | 493.8351        | 969.6364       | 485.3218         | 6 |
| 3 | <b>458.3246</b> | 229.6659        | 441.2980       | 221.1527         | K    | <b>802.5418</b> | 401.7745        | 785.5152       | 393.2613         | 5 |
| 4 | <b>642.4458</b> | 321.7265        | 625.4192       | 313.2132         | K    | <b>600.3828</b> | 300.6950        | 583.3562       | 292.1817         | 4 |
| 5 | 770.5043        | 385.7558        | 753.4778       | 377.2425         | Q    | <b>416.2616</b> | 208.6344        | 399.2350       | 200.1212         | 3 |
| 6 | <b>883.5884</b> | 442.2978        | 866.5619       | 433.7846         | L    | 288.2030        | 144.6051        | 271.1765       | 136.0919         | 2 |
| 7 |                 |                 |                |                  | R    | <b>175.1190</b> | 88.0631         | 158.0924       | 79.5498          | 1 |

Match to Query 19077: 2715.470922 from(906.164250,3+) intensity(55584.5977)

Title: File305 Spectrum14427 scans: 16570

Data file \\192.168.1.104\public\raw data\Elite\_01\methylation\_ZW\k562\2013-5-23-K562-Kpropio-methyl-IP-Fr11-ZW.mgf

Click mouse within plot area to zoom in by factor of two about that point

Or, Plot from  to  Da

Label all possible matches  Label matches used for scoring

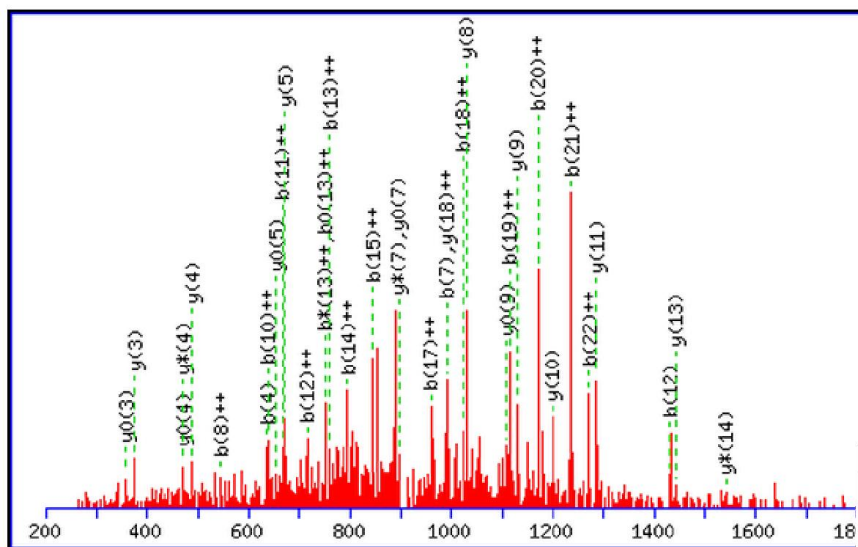

Monoisotopic mass of neutral peptide Mr(calc): 2715.4715  
 Fixed modifications: Carbamidomethyl (C) (apply to specific...)  
 Variable modifications:  
 K1 : Propionyl (K)  
 K4 : Propionyl-(13CD3)Methyl (K)  
 K19 : Propionyl (K)  
 Ions Score: 45 Expect: 0.021  
 Matches : 36/250 fragment ions using 85 most intense peaks

| #  | b                | b <sup>++</sup>  | b <sup>*</sup> | b <sup>+++</sup> | b <sup>0</sup> | b <sup>0++</sup> | Seq. | y                | y <sup>++</sup> | y <sup>*</sup>   | y <sup>+++</sup> | y <sup>0</sup>   | y <sup>0++</sup> | #  |
|----|------------------|------------------|----------------|------------------|----------------|------------------|------|------------------|-----------------|------------------|------------------|------------------|------------------|----|
| 1  | 185.1285         | 93.0679          | 168.1019       | 84.5546          |                |                  | K    |                  |                 |                  |                  |                  |                  | 23 |
| 2  | 322.1874         | 161.5973         | 305.1608       | 153.0840         |                |                  | H    | 2532.3577        | 1266.6825       | 2515.3311        | 1258.1692        | 2514.3471        | 1257.6772        | 21 |
| 3  | 435.2714         | 218.1394         | 418.2449       | 209.6261         |                |                  | L    | 2395.2988        | 1198.1530       | 2378.2722        | 1189.6397        | 2377.2882        | 1189.1477        | 22 |
| 4  | <b>637.4304</b>  | 319.2189         | 620.4039       | 310.7056         |                |                  | K    | 2282.2147        | 1141.6110       | 2265.1882        | 1133.0977        | 2264.2041        | 1132.6057        | 20 |
| 5  | 734.4832         | 367.7452         | 717.4567       | 359.2320         |                |                  | P    | 2080.0557        | 1040.5315       | 2063.0291        | 1032.0182        | 2062.0451        | 1031.5262        | 19 |
| 6  | 863.5258         | 432.2665         | 846.4993       | 423.7533         | 845.5152       | 423.2613         | E    | 1983.0029        | <b>992.0051</b> | 1965.9764        | 983.4918         | 1964.9924        | 982.9998         | 18 |
| 7  | <b>991.5844</b>  | 496.2958         | 974.5578       | 487.7826         | 973.5738       | 487.2905         | Q    | 1853.9603        | 927.4838        | <b>1836.9338</b> | 918.9705         | 1835.9498        | 918.4785         | 17 |
| 8  | 1088.6371        | <b>544.8222</b>  | 1071.6106      | 536.3089         | 1070.6266      | 535.8169         | P    | 1725.9018        | 863.4545        | 1708.8752        | 854.9412         | 1707.8912        | 854.4492         | 16 |
| 9  | 1159.6743        | 580.3408         | 1142.6477      | 571.8275         | 1141.6637      | 571.3355         | A    | 1628.8490        | 814.9281        | 1611.8224        | 806.4149         | 1610.8384        | 805.9229         | 15 |
| 10 | 1274.7012        | <b>637.8542</b>  | 1257.6747      | 629.3410         | 1256.6906      | 628.8490         | D    | 1557.8119        | 779.4096        | <b>1540.7853</b> | 770.8963         | 1539.8013        | 770.4043         | 14 |
| 11 | 1331.7227        | <b>666.3650</b>  | 1314.6961      | 657.8517         | 1313.7121      | 657.3597         | G    | <b>1442.7849</b> | 721.8961        | 1425.7584        | 713.3828         | 1424.7744        | 712.8908         | 13 |
| 12 | <b>1430.7911</b> | <b>715.8992</b>  | 1413.7645      | 707.3859         | 1412.7805      | 706.8939         | V    | 1385.7635        | 693.3854        | 1368.7369        | 684.8721         | 1367.7529        | 684.3801         | 12 |
| 13 | 1517.8231        | <b>759.4152</b>  | 1500.7966      | <b>750.9019</b>  | 1499.8125      | <b>750.4099</b>  | S    | <b>1286.6951</b> | 643.8512        | 1269.6685        | 635.3379         | 1268.6845        | 634.8459         | 11 |
| 14 | 1588.8602        | <b>794.9337</b>  | 1571.8337      | 786.4205         | 1570.8497      | 785.9285         | A    | <b>1199.6630</b> | 600.3352        | 1182.6365        | 591.8219         | 1181.6525        | 591.3299         | 10 |
| 15 | 1687.9286        | <b>844.4680</b>  | 1670.9021      | 835.9547         | 1669.9181      | 835.4627         | V    | <b>1128.6259</b> | 564.8166        | 1111.5994        | 556.3033         | <b>1110.6154</b> | 555.8113         | 9  |
| 16 | 1802.9556        | 901.9814         | 1785.9290      | 893.4682         | 1784.9450      | 892.9761         | D    | <b>1029.5575</b> | 515.2824        | 1012.5310        | 506.7691         | 1011.5469        | 506.2771         | 8  |
| 17 | 1916.0396        | <b>958.5235</b>  | 1899.0131      | 950.0102         | 1898.0291      | 949.5182         | L    | 914.5306         | 457.7689        | <b>897.5040</b>  | 449.2556         | <b>896.5200</b>  | 448.7636         | 7  |
| 18 | 2045.0822        | <b>1023.0448</b> | 2028.0557      | 1014.5315        | 2027.0717      | 1014.0395        | E    | 801.4465         | 401.2269        | 784.4199         | 392.7136         | 783.4359         | 392.2216         | 6  |
| 19 | 2229.2034        | <b>1115.1053</b> | 2212.1769      | 1106.5921        | 2211.1928      | 1106.1001        | K    | <b>672.4039</b>  | 336.7056        | 655.3774         | 328.1923         | <b>654.3933</b>  | 327.7003         | 5  |
| 20 | 2342.2875        | <b>1171.6474</b> | 2325.2609      | 1163.1341        | 2324.2769      | 1162.6421        | L    | <b>488.2827</b>  | 244.6450        | <b>471.2562</b>  | 236.1317         | <b>470.2722</b>  | 235.6397         | 4  |
| 21 | 2471.3301        | <b>1236.1687</b> | 2454.3035      | 1227.6554        | 2453.3195      | 1227.1634        | E    | <b>375.1987</b>  | 188.1030        | 358.1721         | 179.5897         | <b>357.1881</b>  | 179.0977         | 3  |
| 22 | 2542.3672        | <b>1271.6872</b> | 2525.3406      | 1263.1740        | 2524.3566      | 1262.6819        | A    | 246.1561         | 123.5817        | 229.1295         | 115.0684         |                  |                  | 2  |
| 23 |                  |                  |                |                  |                |                  | R    | 175.1190         | 88.0631         | 158.0924         | 79.5498          |                  |                  | 1  |

MS/MS Fragmentation of **KPIVLKR**Found in **H0YCL8**, Sororin (Fragment) OS=Homo sapiens GN=CDCA5 PE=4 SV=1

Match to Query 2119: 982.680268 from(492.347410,2+) intensity(35293.9766)

Title: File371 Spectrum7986 scans: 9918

Data file \\192.168.1.104\public\raw data\Elite\_01\methylation\_ZW\k562\2013-5-15-562-Kpropio-methyl-IP-Fr1-ZW.mgf

Click mouse within plot area to zoom in by factor of two about that point

Or,   to  Da Label all possible matches  Label matches used for scoring 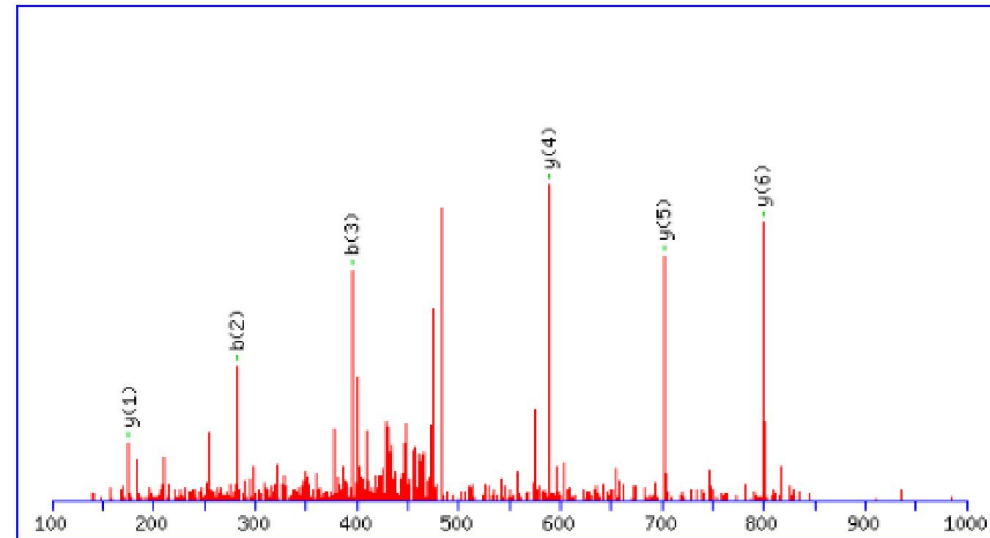

Monoisotopic mass of neutral peptide Mr(calc): 982.6812

Fixed modifications: Carbamidomethyl (C) (apply to specified residues or termini only)

Variable modifications:

K1 : Propionyl (K)

K6 : Propionyl-(13CD3)Methyl (K)

Ions Score: 33 Expect: 0.012

Matches : 6/48 fragment ions using 8 most intense peaks ([help](#))

| # | b               | b <sup>++</sup> | b <sup>*</sup> | b <sup>+++</sup> | Seq. | y               | y <sup>++</sup> | y <sup>*</sup> | y <sup>+++</sup> | # |
|---|-----------------|-----------------|----------------|------------------|------|-----------------|-----------------|----------------|------------------|---|
| 1 | 185.1285        | 93.0679         | 168.1019       | 84.5546          | K    |                 |                 |                |                  | 7 |
| 2 | <b>282.1812</b> | 141.5942        | 265.1547       | 133.0810         | P    | <b>799.5673</b> | 400.2873        | 782.5407       | 391.7740         | 6 |
| 3 | <b>395.2653</b> | 198.1363        | 378.2387       | 189.6230         | I    | <b>702.5145</b> | 351.7609        | 685.4880       | 343.2476         | 5 |
| 4 | 494.3337        | 247.6705        | 477.3071       | 239.1572         | V    | <b>589.4304</b> | 295.2189        | 572.4039       | 286.7056         | 4 |
| 5 | 607.4178        | 304.2125        | 590.3912       | 295.6992         | L    | 490.3620        | 245.6847        | 473.3355       | 237.1714         | 3 |
| 6 | 809.5768        | 405.2920        | 792.5502       | 396.7788         | K    | 377.2780        | 189.1426        | 360.2514       | 180.6293         | 2 |
| 7 |                 |                 |                |                  | R    | <b>175.1190</b> | 88.0631         | 158.0924       | 79.5498          | 1 |

Found in **P55072**, Transitional endoplasmic reticulum ATPase OS=Homo sapiens GN=VCP PE=1 SV=4

Match to Query 5009: 1157.594948 from(579.804750,2+) intensity(399530.6250)

Title: File332 Spectrum2158 scans: 2842

Data file \\192.168.1.104\public\raw data\Elite\_01\methylation\_ZWk562\2013-5-23-K562-Kpropio-methyl-IP-Fr10-ZW.mgf

Click mouse within plot area to zoom in by factor of two about that point

Or, Plot from  to  Da Label all possible matches  Label matches used for scoring 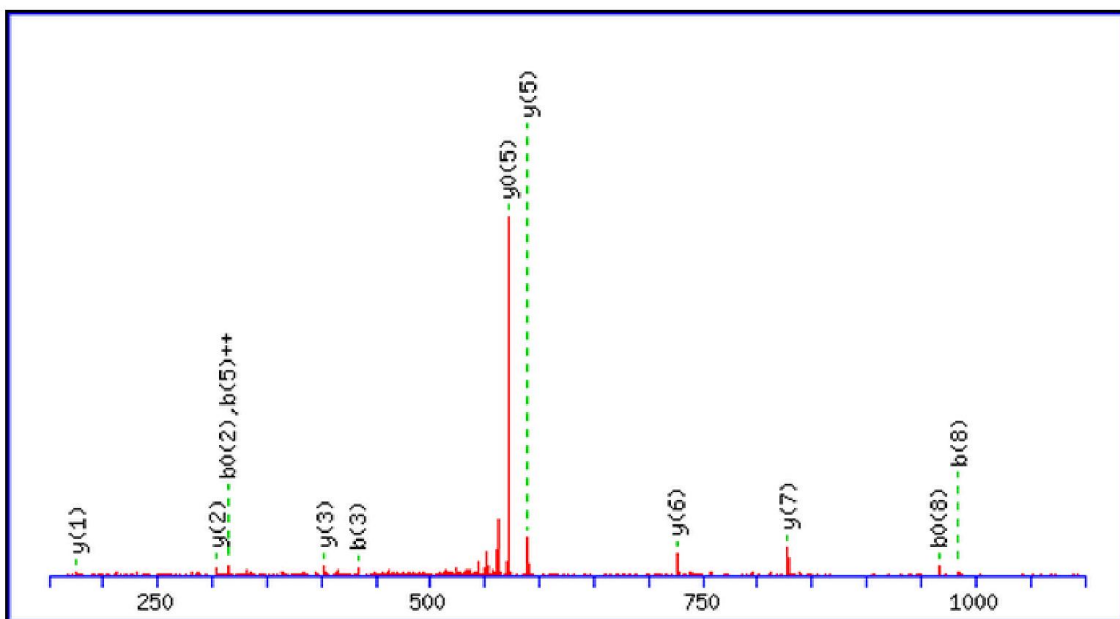

Monoisotopic mass of neutral peptide

Fixed modifications: Carbamidomethyl

Variable modifications:

K2 : Propionyl-(13CD3)Methyl (K)

Ions Score: 42 Expect: 0.019

Matches : 12/92 fragment ions using 2

| # | b        | b <sup>++</sup> | b <sup>*</sup> | b <sup>+++</sup> | b <sup>0</sup> | b <sup>0++</sup> | Seq. | y         | y <sup>++</sup> | y <sup>*</sup> | y <sup>***</sup> | y <sup>0</sup> | y <sup>0++</sup> | # |
|---|----------|-----------------|----------------|------------------|----------------|------------------|------|-----------|-----------------|----------------|------------------|----------------|------------------|---|
| 1 | 130.0499 | 65.5286         |                |                  | 112.0393       | 56.5233          | E    |           |                 |                |                  |                |                  | 9 |
| 2 | 332.2089 | 166.6081        | 315.1823       | 158.0948         | 314.1983       | 157.6028         | K    | 1029.5596 | 515.2834        | 1012.5331      | 506.7702         | 1011.5491      | 506.2782         | 8 |
| 3 | 433.2566 | 217.1319        | 416.2300       | 208.6186         | 415.2460       | 208.1266         | T    | 827.4006  | 414.2039        | 810.3741       | 405.6907         | 809.3900       | 405.1987         | 7 |
| 4 | 570.3155 | 285.6614        | 553.2889       | 277.1481         | 552.3049       | 276.6561         | H    | 726.3529  | 363.6801        | 709.3264       | 355.1668         | 708.3424       | 354.6748         | 6 |
| 5 | 627.3369 | 314.1721        | 610.3104       | 305.6588         | 609.3264       | 305.1668         | G    | 589.2940  | 295.1506        | 572.2675       | 286.6374         | 571.2835       | 286.1454         | 5 |
| 6 | 756.3795 | 378.6934        | 739.3530       | 370.1801         | 738.3690       | 369.6881         | E    | 532.2726  | 266.6399        | 515.2460       | 258.1266         | 514.2620       | 257.6346         | 4 |
| 7 | 855.4479 | 428.2276        | 838.4214       | 419.7143         | 837.4374       | 419.2223         | V    | 403.2300  | 202.1186        | 386.2034       | 193.6053         | 385.2194       | 193.1133         | 3 |
| 8 | 984.4905 | 492.7489        | 967.4640       | 484.2356         | 966.4800       | 483.7436         | E    | 304.1615  | 152.5844        | 287.1350       | 144.0711         | 286.1510       | 143.5791         | 2 |
| 9 |          |                 |                |                  |                |                  | R    | 175.1190  | 88.0631         | 158.0924       | 79.5498          |                |                  | 1 |



MS/MS Fragmentation of **KEKDTPNENR**

Found in **Q15022**, Polycomb protein SUZ12 OS=Homo sapiens GN=SUZ12 PE=1 SV=3

Match to Query 7274: 1359.691268 from(680.852910,2+) intensity(121536.6484)

Title: File334 Spectrum4187 scans: 5014

Data file \\192.168.1.104\public\raw data\Elite\_01\methylation\_ZW\k562\2013-5-23-K562-Kpropio-methyl-IP-Fr12-ZW.mgf

Click mouse within plot area to zoom in by factor of two about that point

Or,  200 to  Da

Label all possible matches  Label matches used for scoring

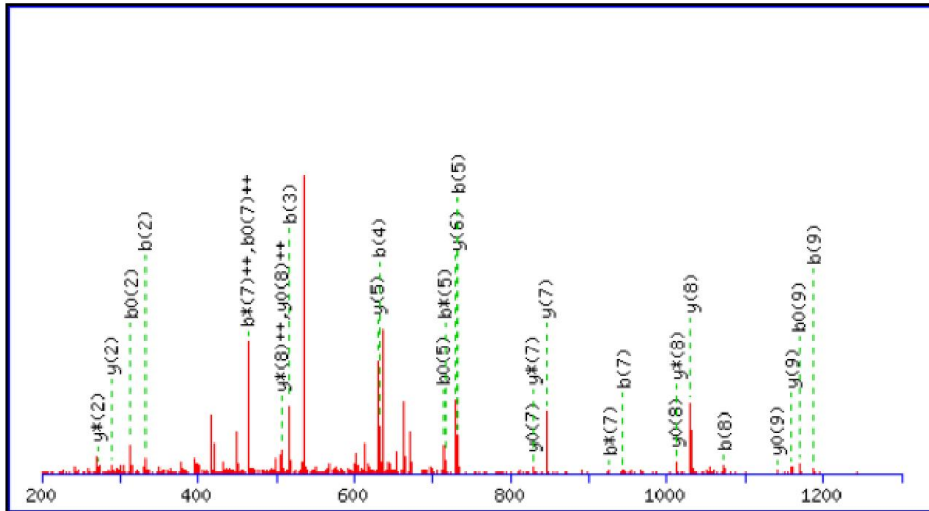

Monoisotopic mass of neutral peptide Mr(calc): 1359.6903

Fixed modifications: Carbamidomethyl (C) (apply to specified residues or termini only)

Variable modifications:

K1 : Propionyl-(13CD3)Methyl (K)

K3 : Propionyl (K)

Ions Score: 35 Expect: 0.12

Matches : 28/102 fragment ions using 51 most intense peaks [\(help\)](#)

| #  | b                | b <sup>++</sup> | b <sup>*</sup>  | b <sup>+++</sup> | b <sup>0</sup>   | b <sup>0++</sup> | Seq. | y                | y <sup>++</sup> | y <sup>*</sup>   | y <sup>+++</sup> | y <sup>0</sup>   | y <sup>0++</sup> | #  |
|----|------------------|-----------------|-----------------|------------------|------------------|------------------|------|------------------|-----------------|------------------|------------------|------------------|------------------|----|
| 1  | 203.1663         | 102.0868        | 186.1397        | 93.5735          |                  |                  | K    |                  |                 |                  |                  |                  |                  | 10 |
| 2  | <b>332.2089</b>  | 166.6081        | 315.1823        | 158.0948         | <b>314.1983</b>  | 157.6028         | E    | <b>1158.5386</b> | 579.7729        | 1141.5120        | 571.2596         | <b>1140.5280</b> | 570.7676         | 9  |
| 3  | <b>516.3301</b>  | 258.6687        | 499.3035        | 250.1554         | 498.3195         | 249.6634         | K    | <b>1029.4960</b> | 515.2516        | <b>1012.4694</b> | <b>506.7383</b>  | <b>1011.4854</b> | <b>506.2463</b>  | 8  |
| 4  | <b>631.3570</b>  | 316.1821        | 614.3305        | 307.6689         | 613.3464         | 307.1769         | D    | <b>845.3748</b>  | 423.1910        | <b>828.3482</b>  | 414.6778         | <b>827.3642</b>  | 414.1857         | 7  |
| 5  | <b>732.4047</b>  | 366.7060        | <b>715.3781</b> | 358.1927         | <b>714.3941</b>  | 357.7007         | T    | <b>730.3478</b>  | 365.6776        | 713.3213         | 357.1643         | 712.3373         | 356.6723         | 6  |
| 6  | 829.4574         | 415.2324        | 812.4309        | 406.7191         | 811.4469         | 406.2271         | P    | <b>629.3002</b>  | 315.1537        | 612.2736         | 306.6404         | 611.2896         | 306.1484         | 5  |
| 7  | <b>943.5004</b>  | 472.2538        | <b>926.4738</b> | <b>463.7406</b>  | 925.4898         | <b>463.2485</b>  | N    | 532.2474         | 266.6273        | 515.2209         | 258.1141         | 514.2368         | 257.6221         | 4  |
| 8  | <b>1072.5430</b> | 536.7751        | 1055.5164       | 528.2618         | 1054.5324        | 527.7698         | E    | 418.2045         | 209.6059        | 401.1779         | 201.0926         | 400.1939         | 200.6006         | 3  |
| 9  | <b>1186.5859</b> | 593.7966        | 1169.5593       | 585.2833         | <b>1168.5753</b> | 584.7913         | N    | <b>289.1619</b>  | 145.0846        | <b>272.1353</b>  | 136.5713         |                  |                  | 2  |
| 10 |                  |                 |                 |                  |                  |                  | R    | 175.1190         | 88.0631         | 158.0924         | 79.5498          |                  |                  | 1  |

Found in **Q71DI3**, Histone H3.2 OS=Homo sapiens GN=HIST2H3A PE=1 SV=3

Match to Query 11298: 1636.979948 from(819.497250,2+) intensity(857586.5000)

Title: File334 Spectrum8017 scans: 9132

Data file \\192.168.1.104\public\raw data\Elite\_01\methylation\_ZW\k562\2013-5-23-K562-Kpropio-methyl-IP-Fr12-ZW.mgf

Click mouse within plot area to zoom in by factor of two about that point

Or,  200  1500  Label all possible matches  Label matches used for scoring 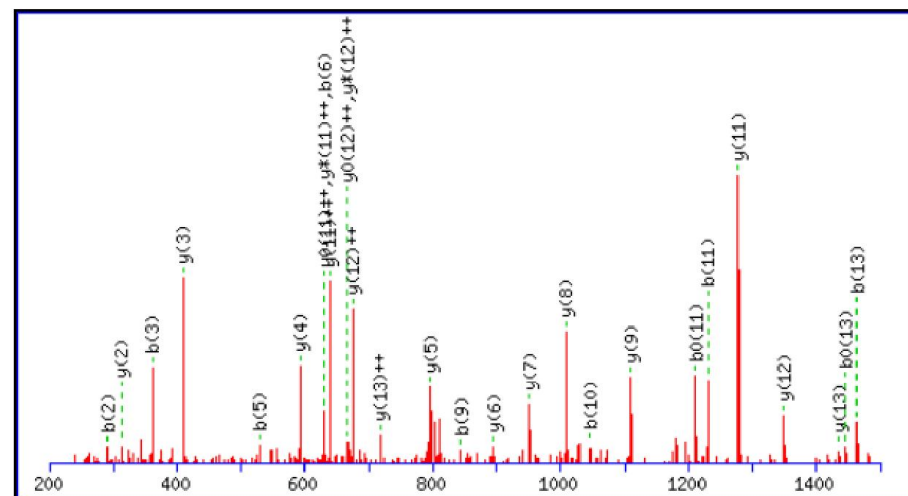

Monoisotopic mass of neutral peptide Mr(calc): 1636.9806

Fixed modifications: Carbamidomethyl (C) (apply to specified residues or termini only)

Variable modifications:

K1 : Propionyl-(13CD3)Methyl (K)

K10 : Propionyl-(13CD3)Methyl (K)

K11 : Propionyl (K)

Ions Score: 86 Expect: 5.2e-007

Matches : 28/138 fragment ions using 39 most intense peaks ([help](#))

| #  | b                | b <sup>++</sup> | b <sup>+</sup> | b <sup>+++</sup> | b <sup>0</sup>   | b <sup>0++</sup> | Seq. | y                | y <sup>++</sup> | y <sup>+</sup> | y <sup>+++</sup> | y <sup>0</sup> | y <sup>0++</sup> | #         |
|----|------------------|-----------------|----------------|------------------|------------------|------------------|------|------------------|-----------------|----------------|------------------|----------------|------------------|-----------|
| 1  | 203.1663         | 102.0868        | 186.1397       | 93.5735          |                  |                  | K    |                  |                 |                |                  |                |                  | 14        |
| 2  | <b>290.1983</b>  | 145.6028        | 273.1718       | 137.0895         | 272.1878         | 136.5975         | S    | <b>1435.8289</b> | <b>718.4181</b> | 1418.8023      | 709.9048         | 1417.8183      | 709.4128         | <b>13</b> |
| 3  | <b>361.2354</b>  | 181.1214        | 344.2089       | 172.6081         | 343.2249         | 172.1161         | A    | <b>1348.7968</b> | <b>674.9021</b> | 1331.7703      | <b>666.3888</b>  | 1330.7863      | <b>665.8968</b>  | <b>12</b> |
| 4  | 458.2882         | 229.6477        | 441.2616       | 221.1345         | 440.2776         | 220.6425         | P    | <b>1277.7597</b> | <b>639.3835</b> | 1260.7332      | <b>630.8702</b>  | 1259.7492      | <b>630.3782</b>  | <b>11</b> |
| 5  | <b>529.3253</b>  | 265.1663        | 512.2988       | 256.6530         | 511.3147         | 256.1610         | A    | 1180.7070        | 590.8571        | 1163.6804      | 582.3438         | 1162.6964      | 581.8518         | <b>10</b> |
| 6  | <b>630.3730</b>  | 315.6901        | 613.3464       | 307.1769         | 612.3624         | 306.6848         | T    | <b>1109.6698</b> | 555.3386        | 1092.6433      | 546.8253         | 1091.6593      | 546.3333         | <b>9</b>  |
| 7  | 687.3945         | 344.2009        | 670.3679       | 335.6876         | 669.3839         | 335.1956         | G    | <b>1008.6222</b> | 504.8147        | 991.5956       | 496.3014         |                |                  | <b>8</b>  |
| 8  | 744.4159         | 372.7116        | 727.3894       | 364.1983         | 726.4054         | 363.7063         | G    | <b>951.6007</b>  | 476.3040        | 934.5741       | 467.7907         |                |                  | <b>7</b>  |
| 9  | <b>843.4843</b>  | 422.2458        | 826.4578       | 413.7325         | 825.4738         | 413.2405         | V    | <b>894.5792</b>  | 447.7933        | 877.5527       | 439.2800         |                |                  | <b>6</b>  |
| 10 | <b>1045.6433</b> | 523.3253        | 1028.6168      | 514.8120         | 1027.6328        | 514.3200         | K    | <b>795.5108</b>  | 398.2590        | 778.4843       | 389.7458         |                |                  | <b>5</b>  |
| 11 | <b>1229.7645</b> | 615.3859        | 1212.7380      | 606.8726         | <b>1211.7540</b> | 606.3806         | K    | <b>593.3518</b>  | 297.1795        | 576.3253       | 288.6663         |                |                  | <b>4</b>  |
| 12 | 1326.8173        | 663.9123        | 1309.7907      | 655.3990         | 1308.8067        | 654.9070         | P    | <b>409.2306</b>  | 205.1190        | 392.2041       | 196.6057         |                |                  | <b>3</b>  |
| 13 | <b>1463.8762</b> | 732.4417        | 1446.8496      | 723.9285         | <b>1445.8656</b> | 723.4365         | H    | <b>312.1779</b>  | 156.5926        | 295.1513       | 148.0793         |                |                  | <b>2</b>  |
| 14 |                  |                 |                |                  |                  |                  | R    | 175.1190         | 88.0631         | 158.0924       | 79.5498          |                |                  | <b>1</b>  |

Found in **Q13442**, 28 kDa heat- and acid-stable phosphoprotein OS=Homo sapiens GN=PDAP1 PE=1 SV=1

Match to Query 16117: 2355.275712 from(786.099180,3+) intensity(42050.9766)

Title: File309 Spectrum14178 scans: 16007

Data file \\192.168.1.104\public\raw data\Elite\_01\methylation\_ZW\k562\2013-5-23-K562-Kpropio-methyl-IP-Fr6-ZW.mgf

Click mouse within plot area to zoom in by factor of two about that point

Or,   to  Da Label all possible matches  Label matches used for scoring 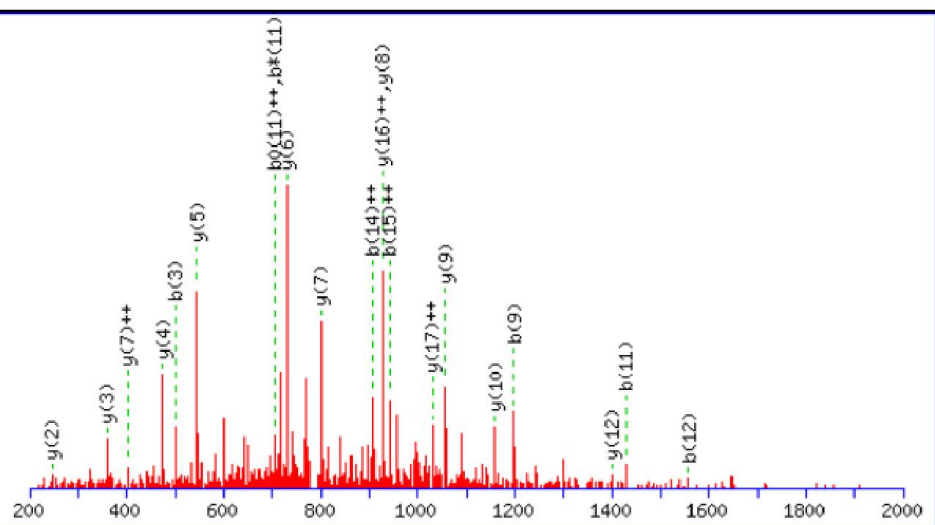

Monoisotopic mass of neutral peptide Mr(calc): 2355.2744

Fixed modifications: Carbamidomethyl (C) (apply to specified residues or termini only)

Variable modifications:

K2 : Label:13C(1)2H(3) (M)  
 K3 : Propionyl-(13CD3)Methyl (K)  
 K4 : Label:13C(1)2H(3) (M)  
 K9 : Propionyl (K)  
 K14 : Propionyl (K)

Ions Score: 58 Expect: 0.0012

Matches : 21/188 fragment ions using 32 most intense peaks ([help](#))

| #  | b                | b <sup>++</sup> | b*        | b <sup>+++</sup> | b <sup>0</sup> | b <sup>0++</sup> | Seq. | y                | y <sup>++</sup>  | y*        | y <sup>+++</sup> | y <sup>0</sup> | y <sup>0++</sup> | #  |
|----|------------------|-----------------|-----------|------------------|----------------|------------------|------|------------------|------------------|-----------|------------------|----------------|------------------|----|
| 1  | 164.0706         | 82.5389         |           |                  |                |                  | Y    |                  |                  |           |                  |                |                  | 19 |
| 2  | 299.1333         | 150.0703        |           |                  |                |                  | M    | 2193.2184        | 1097.1128        | 2176.1919 | 1088.5996        | 2175.2078      | 1088.1076        | 18 |
| 3  | <b>501.2923</b>  | 251.1498        | 484.2657  | 242.6365         |                |                  | K    | 2058.1557        | <b>1029.5815</b> | 2041.1292 | 1021.0682        | 2040.1452      | 1020.5762        | 17 |
| 4  | 636.3550         | 318.6811        | 619.3284  | 310.1678         |                |                  | M    | 1855.9967        | <b>928.5020</b>  | 1838.9702 | 919.9887         | 1837.9862      | 919.4967         | 16 |
| 5  | 773.4139         | 387.2106        | 756.3873  | 378.6973         |                |                  | H    | 1720.9341        | 860.9707         | 1703.9075 | 852.4574         | 1702.9235      | 851.9654         | 15 |
| 6  | 886.4979         | 443.7526        | 869.4714  | 435.2393         |                |                  | L    | 1583.8751        | 792.4412         | 1566.8486 | 783.9279         | 1565.8646      | 783.4359         | 14 |
| 7  | 957.5350         | 479.2712        | 940.5085  | 470.7579         |                |                  | A    | 1470.7911        | 735.8992         | 1453.7645 | 727.3859         | 1452.7805      | 726.8939         | 13 |
| 8  | 1014.5565        | 507.7819        | 997.5300  | 499.2686         |                |                  | G    | <b>1399.7540</b> | 700.3806         | 1382.7274 | 691.8673         | 1381.7434      | 691.3753         | 12 |
| 9  | <b>1198.6777</b> | 599.8425        | 1181.6511 | 591.3292         |                |                  | K    | 1342.7325        | 671.8699         | 1325.7060 | 663.3566         | 1324.7219      | 662.8646         | 11 |
| 10 | 1299.7254        | 650.3663        | 1282.6988 | 641.8530         | 1281.7148      | 641.3610         | T    | <b>1158.6113</b> | 579.8093         | 1141.5848 | 571.2960         | 1140.6008      | 570.8040         | 10 |
| 11 | <b>1428.7680</b> | 714.8876        | 1411.7414 | <b>706.3743</b>  | 1410.7574      | <b>705.8823</b>  | E    | <b>1057.5637</b> | 529.2855         | 1040.5371 | 520.7722         | 1039.5531      | 520.2802         | 9  |
| 12 | <b>1556.8265</b> | 778.9169        | 1539.8000 | 770.4036         | 1538.8160      | 769.9116         | Q    | <b>928.5211</b>  | 464.7642         | 911.4945  | 456.2509         | 910.5105       | 455.7589         | 8  |
| 13 | 1627.8637        | 814.4355        | 1610.8371 | 805.9222         | 1609.8531      | 805.4302         | A    | <b>800.4625</b>  | <b>400.7349</b>  | 783.4359  | 392.2216         | 782.4519       | 391.7296         | 7  |
| 14 | 1811.9848        | <b>906.4961</b> | 1794.9583 | 897.9828         | 1793.9743      | 897.4908         | K    | <b>729.4254</b>  | 365.2163         | 712.3988  | 356.7030         | 711.4148       | 356.2110         | 6  |
| 15 | 1883.0219        | <b>942.0146</b> | 1865.9954 | 933.5013         | 1865.0114      | 933.0093         | A    | <b>545.3042</b>  | 273.1557         | 528.2776  | 264.6425         | 527.2936       | 264.1504         | 5  |
| 16 | 1998.0489        | 999.5281        | 1981.0223 | 991.0148         | 1980.0383      | 990.5228         | D    | <b>474.2671</b>  | 237.6372         | 457.2405  | 229.1239         | 456.2565       | 228.6319         | 4  |
| 17 | 2111.1330        | 1056.0701       | 2094.1064 | 1047.5568        | 2093.1224      | 1047.0648        | L    | <b>359.2401</b>  | 180.1237         | 342.2136  | 171.6104         |                |                  | 3  |
| 18 | 2182.1701        | 1091.5887       | 2165.1435 | 1083.0754        | 2164.1595      | 1082.5834        | A    | <b>246.1561</b>  | 123.5817         | 229.1295  | 115.0684         |                |                  | 2  |
| 19 |                  |                 |           |                  |                |                  | R    | 175.1190         | 88.0631          | 158.0924  | 79.5498          |                |                  | 1  |

Found in **P52597**, Heterogeneous nuclear ribonucleoprotein F OS=Homo sapiens GN=HNRNPF PE=1 SV=3

Match to Query 7163: 1419.836888 from(710.925720,2+) intensity(76685.4297)

Title: File309 Spectrum12005 scans: 13689

Data file \\192.168.1.104\public\raw data\Elite\_01\methylation\_ZW\k562\2013-5-23-K562-Kpropio-methyl-IP-Fr6-ZW.mgf

Click mouse within plot area to zoom in by factor of two about that point

Or,  200 to  Da

Label all possible matches  Label matches used for scoring

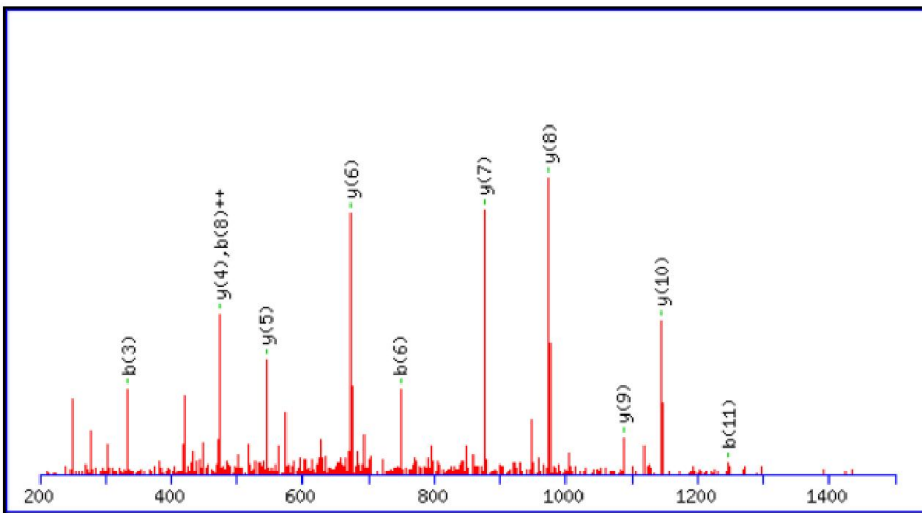

Monoisotopic mass of neutral peptide Mr(calcd): 1419.8358

Fixed modifications: Carbamidomethyl (C) (apply to specified residues or termini only)

Variable modifications:

K6 : Propionyl-(13CD3)Methyl (K)

Ions Score: 61 Expect: 0.00024

Matches : 11/100 fragment ions using 12 most intense peaks [\(help\)](#)

| #  | b                | b <sup>++</sup> | b <sup>*</sup> | b <sup>+++</sup> | b <sup>0</sup> | b <sup>0++</sup> | Seq. | y                | y <sup>++</sup> | y <sup>*</sup> | y <sup>+++</sup> | y <sup>0</sup> | y <sup>0++</sup> | #  |
|----|------------------|-----------------|----------------|------------------|----------------|------------------|------|------------------|-----------------|----------------|------------------|----------------|------------------|----|
| 1  | 164.0706         | 82.5389         |                |                  |                |                  | Y    |                  |                 |                |                  |                |                  | 12 |
| 2  | 277.1547         | 139.0810        |                |                  |                |                  | I    | 1257.7798        | 629.3935        | 1240.7532      | 620.8803         | 1239.7692      | 620.3882         | 11 |
| 3  | <b>334.1761</b>  | 167.5917        |                |                  |                |                  | G    | <b>3144.6957</b> | 572.8515        | 1127.6692      | 564.3382         | 1126.6852      | 563.8462         | 10 |
| 4  | 447.2602         | 224.1337        |                |                  |                |                  | I    | <b>1087.6743</b> | 544.3408        | 1070.6477      | 535.8275         | 1069.6637      | 535.3355         | 9  |
| 5  | 546.3286         | 273.6679        |                |                  |                |                  | V    | <b>974.5902</b>  | 487.7987        | 957.5636       | 479.2855         | 956.5796       | 478.7935         | 8  |
| 6  | <b>748.4876</b>  | 374.7475        | 731.4611       | 366.2342         |                |                  | K    | <b>875.5218</b>  | 438.2645        | 858.4952       | 429.7513         | 857.5112       | 429.2592         | 7  |
| 7  | 876.5462         | 438.7767        | 859.5197       | 430.2635         |                |                  | Q    | <b>673.3628</b>  | 337.1850        | 656.3362       | 328.6717         | 655.3522       | 328.1797         | 6  |
| 8  | 947.5833         | <b>474.2953</b> | 930.5568       | 465.7820         |                |                  | A    | <b>545.3042</b>  | 273.1557        | 528.2776       | 264.6425         | 527.2936       | 264.1504         | 5  |
| 9  | 1004.6048        | 502.8060        | 987.5782       | 494.2928         |                |                  | G    | <b>474.2671</b>  | 237.6372        | 457.2405       | 229.1239         | 456.2565       | 228.6319         | 4  |
| 10 | 1117.6888        | 559.3481        | 1100.6623      | 550.8348         |                |                  | L    | 417.2456         | 209.1264        | 400.2191       | 200.6132         | 399.2350       | 200.1212         | 3  |
| 11 | <b>1246.7314</b> | 623.8694        | 1229.7049      | 615.3561         | 1228.7209      | 614.8641         | E    | 304.1615         | 152.5844        | 287.1350       | 144.0711         | 286.1510       | 143.5791         | 2  |
| 12 |                  |                 |                |                  |                |                  | R    | 175.1190         | 88.0631         | 158.0924       | 79.5498          |                |                  | 1  |

Found in **P62805**, Histone H4 OS=Homo sapiens GN=HIST1H4A PE=1 SV=2

Match to Query 13677: 1951.186748 from(976.600650,2+) intensity(222395.4688)

Title: File309 Spectrum11582 scans: 13238

Data file \\192.168.1.104\public\raw data\Elite\_01\methylation\_ZW\k562\2013-5-23-K562-Kpropio-methyl-IP-Fr6-ZW.mgf

Click mouse within plot area to zoom in by factor of two about that point

Or,   to  Da Label all possible matches  Label matches used for scoring 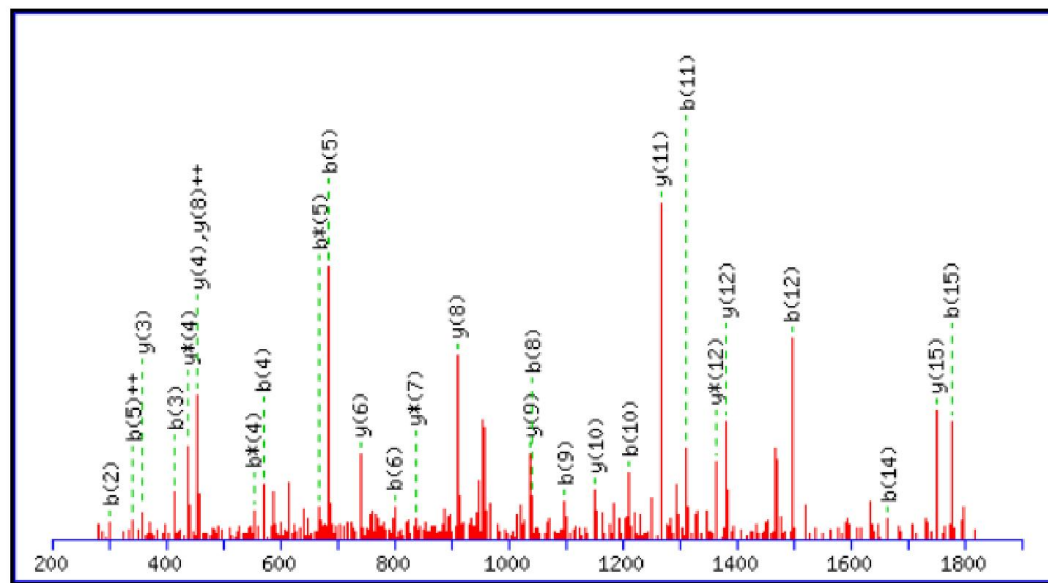

Monoisotopic mass of neutral peptide Mr(calc): 1951.1851

Fixed modifications: Carbamidomethyl (C) (apply to specified residues only)

Variable modifications:

K1 : Propionyl-(13CD3)Methyl (K)

K12 : Propionyl (K)

Ions Score: 80 Expect: 1.1e-006

Matches : 28/162 fragment ions using 48 most intense peaks ([help](#))

| #  | b                | b <sup>++</sup> | b <sup>*</sup>  | b <sup>*++</sup> | b <sup>0</sup> | b <sup>0++</sup> | Seq. | y                | y <sup>++</sup> | y <sup>*</sup>   | y <sup>*++</sup> | y <sup>0</sup> | y <sup>0++</sup> | #  |
|----|------------------|-----------------|-----------------|------------------|----------------|------------------|------|------------------|-----------------|------------------|------------------|----------------|------------------|----|
| 1  | 203.1663         | 102.0868        | 186.1397        | 93.5718          |                |                  | K    |                  |                 |                  |                  |                |                  | 16 |
| 2  | <b>302.2347</b>  | 151.6210        | 285.2082        | 143.1077         |                |                  | V    | <b>1750.0334</b> | 875.5203        | 1733.0068        | 867.0071         | 1732.0228      | 866.5150         | 15 |
| 3  | <b>415.3188</b>  | 208.1630        | 398.2922        | 199.6497         |                |                  | L    | 1650.9650        | 825.9861        | 1633.9384        | 817.4728         | 1632.9544      | 816.9808         | 14 |
| 4  | <b>571.4199</b>  | 286.2136        | <b>554.3933</b> | 277.7003         |                |                  | R    | 1537.8809        | 769.4441        | 1520.8544        | 760.9308         | 1519.8703      | 760.4388         | 13 |
| 5  | <b>686.4468</b>  | <b>343.7270</b> | <b>669.4203</b> | 335.2138         | 668.4363       | 334.7218         | D    | <b>1381.7798</b> | 691.3935        | <b>1364.7532</b> | 682.8803         | 1363.7692      | 682.3883         | 12 |
| 6  | <b>800.4897</b>  | 400.7485        | 783.4632        | 392.2352         | 782.4792       | 391.7432         | N    | <b>1266.7528</b> | 633.8801        | 1249.7263        | 625.3668         | 1248.7423      | 624.8748         | 11 |
| 7  | 913.5738         | 457.2905        | 896.5473        | 448.7773         | 895.5632       | 448.2853         | I    | <b>1152.7099</b> | 576.8586        | 1135.6834        | 568.3453         | 1134.6994      | 567.8533         | 10 |
| 8  | <b>1041.6324</b> | 521.3198        | 1024.6058       | 512.8066         | 1023.6218      | 512.3146         | Q    | <b>1039.6259</b> | 520.3166        | 1022.5993        | 511.8033         | 1021.6153      | 511.3113         | 9  |
| 9  | <b>1098.6539</b> | 549.8306        | 1081.6273       | 541.3173         | 1080.6433      | 540.8253         | G    | <b>911.5673</b>  | <b>456.2873</b> | 894.5407         | 447.7740         | 893.5567       | 447.2820         | 8  |
| 10 | <b>1211.7379</b> | 606.3726        | 1194.7114       | 597.8593         | 1193.7274      | 597.3673         | I    | 854.5458         | 427.7765        | <b>837.5193</b>  | 419.2633         | 836.5352       | 418.7713         | 7  |
| 11 | <b>1312.7856</b> | 656.8964        | 1295.7590       | 648.3832         | 1294.7750      | 647.8912         | T    | <b>741.4618</b>  | 371.2345        | 724.4352         | 362.7212         | 723.4512       | 362.2292         | 6  |
| 12 | <b>1496.9068</b> | 748.9570        | 1479.8802       | 740.4438         | 1478.8962      | 739.9517         | K    | 640.4141         | 320.7107        | 623.3875         | 312.1974         |                |                  | 5  |
| 13 | 1593.9595        | 797.4834        | 1576.9330       | 788.9701         | 1575.9490      | 788.4781         | P    | <b>456.2929</b>  | 228.6501        | <b>439.2663</b>  | 220.1368         |                |                  | 4  |
| 14 | <b>1664.9967</b> | 833.0020        | 1647.9701       | 824.4887         | 1646.9861      | 823.9967         | A    | <b>359.2401</b>  | 180.1237        | 342.2136         | 171.6104         |                |                  | 3  |
| 15 | <b>1778.0807</b> | 889.5440        | 1761.0542       | 881.0307         | 1760.0702      | 880.5387         | I    | 288.2030         | 144.6051        | 271.1765         | 136.0919         |                |                  | 2  |
| 16 |                  |                 |                 |                  |                |                  | R    | 175.1190         | 88.0631         | 158.0924         | 79.5498          |                |                  | 1  |

# MS/MS Fragmentation of **LKANKDSLYKPILR**

Found in **Q14692**, Ribosome biogenesis protein BMS1 homolog OS=Homo sapiens GN=BMS1 PE=1 SV=1

Match to Query 14025: 1844.104348 from(923.059450,2+) intensity(154355.6250)

Title: File312 Spectrum16529 scans: 18598

Data file \\192.168.1.104\public\raw data\Elite\_01\methylation\_ZW\k562\2013-5-23-K562-Kpropio-methyl-IP-Fr8-ZW.mgf

Click mouse within plot area to zoom in by factor of two about that point

Or,   to  Da

Label all possible matches  Label matches used for scoring

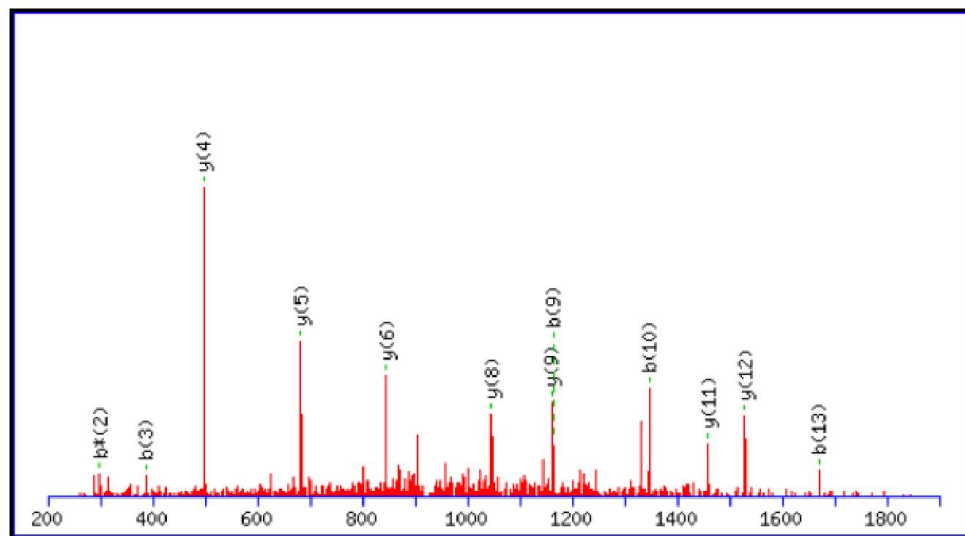

Monoisotopic mass of neutral peptide Mr(calc): 1844.1044

Fixed modifications: Carbamidomethyl (C) (apply to specified residues or termini only)

Variable modifications:

K2 : Propionyl-(13CD3)Methyl (K)

K5 : Propionyl (K)

K10 : Propionyl (K)

Ions Score: 53 Expect: 0.00099

Matches : 12/130 fragment ions using 16 most intense peaks ([help](#))

| #  | b         | b <sup>++</sup> | b <sup>*</sup> | b <sup>*++</sup> | b <sup>0</sup> | b <sup>0++</sup> | Seq. | y         | y <sup>++</sup> | y <sup>*</sup> | y <sup>*++</sup> | y <sup>0</sup> | y <sup>0++</sup> | #  |
|----|-----------|-----------------|----------------|------------------|----------------|------------------|------|-----------|-----------------|----------------|------------------|----------------|------------------|----|
| 1  | 114.0913  | 57.5493         |                |                  |                |                  | L    |           |                 |                |                  |                |                  | 14 |
| 2  | 316.2504  | 158.6288        | 299.2238       | 150.1155         |                |                  | K    | 1732.0276 | 866.5174        | 1715.0011      | 858.0042         | 1714.0171      | 857.5122         | 13 |
| 3  | 387.2875  | 194.1474        | 370.2609       | 185.6341         |                |                  | A    | 1529.8686 | 765.4379        | 1512.8421      | 756.9247         | 1511.8580      | 756.4327         | 12 |
| 4  | 501.3304  | 251.1688        | 484.3038       | 242.6556         |                |                  | N    | 1458.8315 | 729.9194        | 1441.8049      | 721.4061         | 1440.8209      | 720.9141         | 11 |
| 5  | 685.4516  | 343.2294        | 668.4250       | 334.7161         |                |                  | K    | 1344.7886 | 672.8979        | 1327.7620      | 664.3846         | 1326.7780      | 663.8926         | 10 |
| 6  | 800.4785  | 400.7429        | 783.4520       | 392.2296         | 782.4679       | 391.7376         | D    | 1160.6674 | 580.8373        | 1143.6408      | 572.3241         | 1142.6568      | 571.8320         | 9  |
| 7  | 887.5105  | 444.2589        | 870.4840       | 435.7456         | 869.5000       | 435.2536         | S    | 1045.6404 | 523.3239        | 1028.6139      | 514.8106         | 1027.6299      | 514.3186         | 8  |
| 8  | 1000.5946 | 500.8009        | 983.5681       | 492.2877         | 982.5840       | 491.7957         | L    | 958.6084  | 479.8078        | 941.5819       | 471.2946         |                |                  | 7  |
| 9  | 1163.6579 | 582.3326        | 1146.6314      | 573.8193         | 1145.6474      | 573.3273         | Y    | 845.5244  | 423.2658        | 828.4978       | 414.7525         |                |                  | 6  |
| 10 | 1347.7791 | 674.3932        | 1330.7526      | 665.8799         | 1329.7685      | 665.3879         | K    | 682.4610  | 341.7341        | 665.4345       | 333.2209         |                |                  | 5  |
| 11 | 1444.8319 | 722.9196        | 1427.8053      | 714.4063         | 1426.8213      | 713.9143         | P    | 498.3398  | 249.6736        | 481.3133       | 241.1603         |                |                  | 4  |
| 12 | 1557.9159 | 779.4616        | 1540.8894      | 770.9483         | 1539.9054      | 770.4563         | I    | 401.2871  | 201.1472        | 384.2605       | 192.6339         |                |                  | 3  |
| 13 | 1671.0000 | 836.0036        | 1653.9735      | 827.4904         | 1652.9894      | 826.9984         | L    | 288.2030  | 144.6051        | 271.1765       | 136.0919         |                |                  | 2  |
| 14 |           |                 |                |                  |                |                  | R    | 175.1190  | 88.0631         | 158.0924       | 79.5498          |                |                  | 1  |

Match to Query 4722: 1229.697848 from(615.856200,2+) intensity(20065.5801)

Title: File314 Spectrum4887 scans: 6302

Data file \\192.168.1.104\public\raw data\Elite\_01\methylation\_ZW\k562\2013-5-23-K562-Kpropio-methyl-IP-Fr9-ZW.mgf

Click mouse within plot area to zoom in by factor of two about that point

Or,   to  Da Label all possible matches  Label matches used for scoring 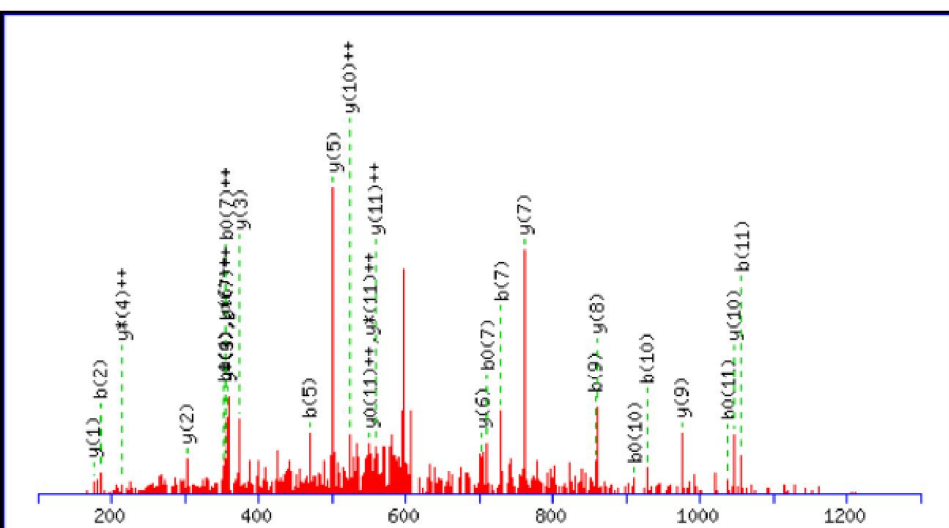

Monoisotopic mass of neutral peptide Mr(calc): 1229.7001

Fixed modifications: Carbamidomethyl (C) (apply to specified residues or termini only)

Variable modifications:

K7 : Propionyl-(13CD3)Methyl (K)

Ions Score: 41 Expect: 0.034

Matches : 28/98 fragment ions using 72 most intense peaks ([help](#))

| #  | b         | y <sup>0</sup> | b <sup>+</sup> | b <sup>++</sup> | b <sup>0</sup> | b <sup>0++</sup> | Seq. | y         | y <sup>++</sup> | y <sup>*</sup> | y <sup>+++</sup> | y <sup>0</sup> | y <sup>0++</sup> | #  |
|----|-----------|----------------|----------------|-----------------|----------------|------------------|------|-----------|-----------------|----------------|------------------|----------------|------------------|----|
| 1  | 114.0913  | 57.5493        |                |                 |                |                  | L    |           |                 |                |                  |                |                  | 12 |
| 2  | 185.1285  | 93.0679        |                |                 |                |                  | A    | 1117.6233 | 559.3153        | 1100.5967      | 550.8020         | 1099.6127      | 550.3100         | 11 |
| 3  | 256.1656  | 128.5864       |                |                 |                |                  | A    | 1046.5862 | 523.7967        | 1029.5596      | 515.2834         | 1028.5756      | 514.7914         | 10 |
| 4  | 371.1925  | 186.0999       |                |                 | 353.1819       | 177.0946         | D    | 975.5491  | 488.2782        | 958.5225       | 479.7649         | 957.5385       | 479.2729         | 9  |
| 5  | 470.2609  | 235.6341       |                |                 | 452.2504       | 226.6288         | V    | 860.5221  | 430.7647        | 843.4956       | 422.2514         |                |                  | 8  |
| 6  | 527.2824  | 264.1448       |                |                 | 509.2718       | 255.1396         | G    | 761.4537  | 381.2305        | 744.4272       | 372.7172         |                |                  | 7  |
| 7  | 729.4414  | 365.2243       | 712.4149       | 356.7111        | 711.4308       | 356.2191         | K    | 704.4322  | 352.7198        | 687.4057       | 344.2065         |                |                  | 6  |
| 8  | 786.4629  | 393.7351       | 769.4363       | 385.2218        | 768.4523       | 384.7298         | G    | 502.2732  | 251.6402        | 485.2467       | 243.1270         |                |                  | 5  |
| 9  | 857.5000  | 429.2536       | 840.4734       | 420.7404        | 839.4894       | 420.2483         | A    | 445.2518  | 223.1295        | 428.2252       | 214.6162         |                |                  | 4  |
| 10 | 928.5371  | 464.7722       | 911.5105       | 456.2589        | 910.5265       | 455.7669         | A    | 374.2146  | 187.6110        | 357.1881       | 179.0977         |                |                  | 3  |
| 11 | 1056.5957 | 528.8015       | 1039.5691      | 520.2882        | 1038.5851      | 519.7962         | Q    | 303.1775  | 152.0924        | 286.1510       | 143.5791         |                |                  | 2  |
| 12 |           |                |                |                 |                |                  | R    | 175.1190  | 88.0631         | 158.0924       | 79.5498          |                |                  | 1  |

MS/MS Fragmentation of **AQYKGAASEAGR**

Found in **Q14320**, Protein FAM50A OS=Homo sapiens GN=FAM50A PE=1 SV=2

Match to Query 5830: 1319.647068 from(660.830810, 2+) intensity(899282.4375)

Title: File1284 Spectrum9530 scans: 10231

Data file I:\2013-9-12-Hela-Prometh-Fr9-ZW.mgf

Click mouse within plot area to zoom in by factor of two about that point

Or,   to  Da

Label all possible matches  Label matches used for scoring

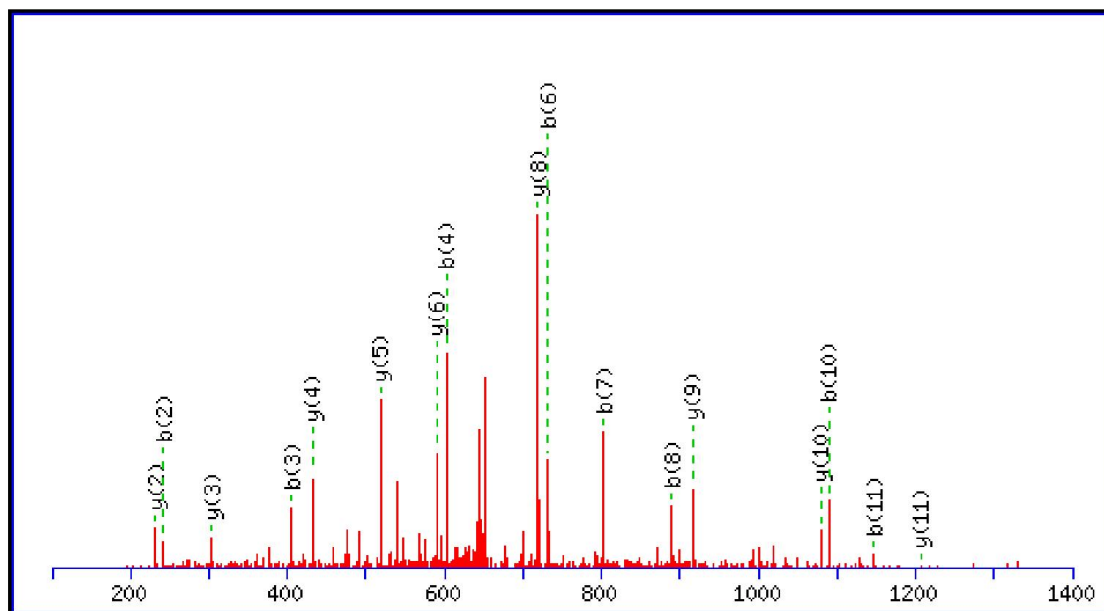

**Monoisotopic mass of neutral peptide Mr(calc): 1319.6469**

**Fixed modifications:** Carbamidomethyl (C) (apply to spec)

**Variable modifications:**

**N-term :** Acetyl (Protein N-term)

**K4 :** Propionyl-Methylation (K)

**Ions Score: 77 Expect: 7.3e-006**

**Matches : 17/110 fragment ions using 24 most intense peak**

| #  | b                | b <sup>++</sup> | b*        | b <sup>+++</sup> | b <sup>0</sup> | b <sup>0++</sup> | Seq. | y                | y <sup>++</sup> | y*        | y <sup>+++</sup> | y <sup>0</sup> | y <sup>0++</sup> | #  |
|----|------------------|-----------------|-----------|------------------|----------------|------------------|------|------------------|-----------------|-----------|------------------|----------------|------------------|----|
| 1  | 114.0550         | 57.5311         |           |                  |                |                  | A    |                  |                 |           |                  |                |                  | 12 |
| 2  | <b>242.1135</b>  | 121.5604        | 225.0870  | 113.0471         |                |                  | Q    | <b>1207.6066</b> | 604.3069        | 1190.5800 | 595.7937         | 1189.5960      | 595.3016         | 11 |
| 3  | <b>405.1769</b>  | 203.0921        | 388.1503  | 194.5788         |                |                  | Y    | <b>1079.5480</b> | 540.2776        | 1062.5215 | 531.7644         | 1061.5374      | 531.2724         | 10 |
| 4  | <b>603.3137</b>  | 302.1605        | 586.2871  | 293.6472         |                |                  | K    | <b>916.4847</b>  | 458.7460        | 899.4581  | 450.2327         | 898.4741       | 449.7407         | 9  |
| 5  | 660.3352         | 330.6712        | 643.3086  | 322.1579         |                |                  | G    | <b>718.3478</b>  | 359.6776        | 701.3213  | 351.1643         | 700.3373       | 350.6723         | 8  |
| 6  | <b>731.3723</b>  | 366.1898        | 714.3457  | 357.6765         |                |                  | A    | 661.3264         | 331.1668        | 644.2998  | 322.6536         | 643.3158       | 322.1615         | 7  |
| 7  | <b>802.4094</b>  | 401.7083        | 785.3823  | 393.1951         |                |                  | A    | <b>590.2893</b>  | 295.6483        | 573.2627  | 287.1350         | 572.2787       | 286.6430         | 6  |
| 8  | <b>889.4414</b>  | 445.2243        | 872.4143  | 436.7111         | 871.4308       | 436.2191         | S    | <b>519.2522</b>  | 260.1297        | 502.2256  | 251.6164         | 501.2416       | 251.1244         | 5  |
| 9  | 1018.4840        | 509.7456        | 1001.4575 | 501.2324         | 1000.4734      | 500.7404         | E    | <b>432.2201</b>  | 216.6137        | 415.1936  | 208.1004         | 414.2096       | 207.6084         | 4  |
| 10 | <b>1089.5211</b> | 545.2642        | 1072.4948 | 536.7509         | 1071.5106      | 536.2589         | A    | <b>303.1775</b>  | 152.0924        | 286.1510  | 143.5791         |                |                  | 3  |
| 11 | <b>1146.5426</b> | 573.7749        | 1129.5160 | 565.2617         | 1128.5320      | 564.7696         | G    | <b>232.1404</b>  | 116.5738        | 215.1139  | 108.0806         |                |                  | 2  |
| 12 |                  |                 |           |                  |                |                  | R    | 175.1190         | 88.0631         | 158.0924  | 79.5498          |                |                  | 1  |



Match to Query 4910: 1224.717008 from(613.365780, 2+) intensity(136380.3906)

Title: File1284 Spectrum8249 scans: 8896

Data file I:\2013-9-12-Hela-Prometh-Fr9-ZW.mgf

Click mouse within plot area to zoom in by factor of two about that point

Or,   to  DaLabel all possible matches  Label matches used for scoring 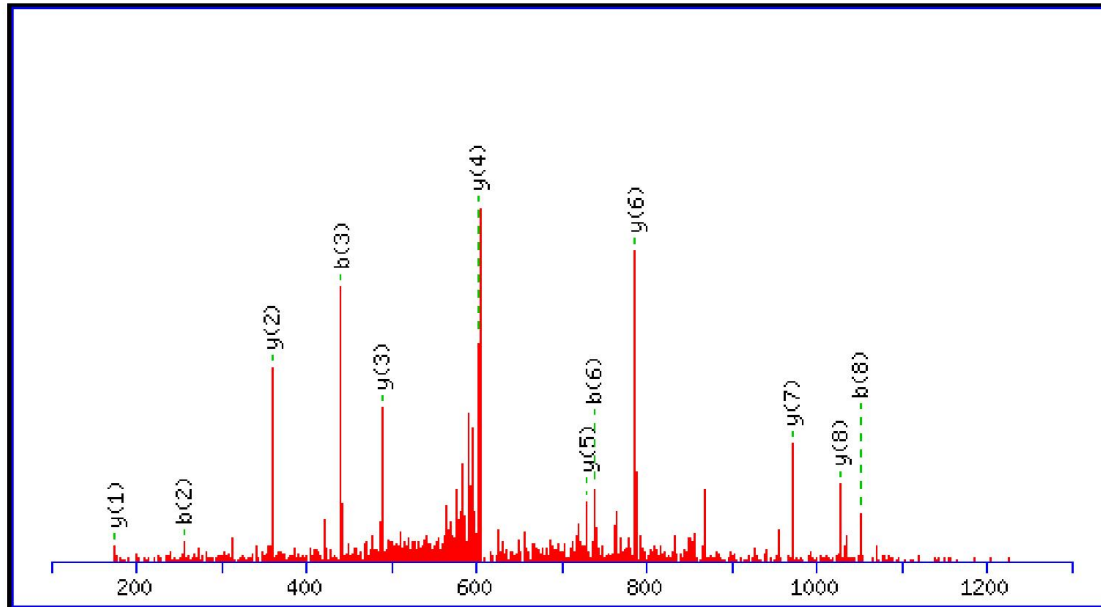**Monoisotopic mass of neutral peptide Mr(calc):** 1224.7190**Fixed modifications:** Carbamidomethyl (C) (apply to specified residues or termini only)**Variable modifications:****K1** : Propionyl-Methylation (K)**K3** : Propionyl (K)**K8** : Propionyl (K)**Ions Score:** 57 **Expect:** 0.001**Matches** : 12/80 fragment ions using 22 most intense peaks

| # | b                | b <sup>++</sup> | b*        | b <sup>++</sup> * | b <sup>0</sup> | b <sup>0++</sup> | Seq. | y                | y <sup>++</sup> | y*        | y <sup>++</sup> * | y <sup>0</sup> | y <sup>0++</sup> | # |
|---|------------------|-----------------|-----------|-------------------|----------------|------------------|------|------------------|-----------------|-----------|-------------------|----------------|------------------|---|
| 1 | 199.1491         | 100.0757        | 182.1176  | 91.5624           |                |                  | K    |                  |                 |           |                   |                |                  | 9 |
| 2 | <b>256.1656</b>  | 128.5864        | 239.1390  | 120.0731          |                |                  | G    | <b>1027.5895</b> | 514.2984        | 1010.5629 | 505.7851          | 1009.5789      | 505.2931         | 8 |
| 3 | <b>440.2867</b>  | 220.6474        | 423.2602  | 212.1337          |                |                  | K    | <b>970.5680</b>  | 485.7876        | 953.5415  | 477.2744          | 952.5574       | 476.7824         | 7 |
| 4 | 497.3082         | 249.1577        | 480.2817  | 240.6445          |                |                  | G    | <b>786.4468</b>  | 393.7271        | 769.4203  | 385.2138          | 768.4363       | 384.7218         | 6 |
| 5 | 625.3668         | 313.1870        | 608.3402  | 304.6738          |                |                  | Q    | <b>729.4254</b>  | 365.2163        | 712.3988  | 356.7030          | 711.4148       | 356.2110         | 5 |
| 6 | <b>738.4509</b>  | 369.7291        | 721.4243  | 361.2158          |                |                  | I    | <b>601.3668</b>  | 301.1870        | 584.3402  | 292.6738          | 583.3562       | 292.1817         | 4 |
| 7 | 867.4934         | 434.2504        | 850.4669  | 425.7371          | 849.4829       | 425.2451         | E    | <b>488.2827</b>  | 244.6450        | 471.2562  | 236.1317          | 470.2722       | 235.6397         | 3 |
| 8 | <b>1051.6146</b> | 526.3109        | 1034.5881 | 517.7977          | 1033.6041      | 517.3057         | K    | <b>359.2401</b>  | 180.1237        | 342.2136  | 171.6104          |                |                  | 2 |
| 9 |                  |                 |           |                   |                |                  | R    | <b>175.1190</b>  | 88.0631         | 158.0924  | 79.5498           |                |                  | 1 |

Match to Query 22039: 3231.443622 from(1078.155150, 3+) intensity(15968.8232)

Title: File1284 Spectrum16424 scans: 17412

Data file I:\2013-9-12-Hela-Prometh-Fr9-ZW.mgf

Click mouse within plot area to zoom in by factor of two about that point

Or, Plot from  to  Da Label all possible matches  Label matches used for scoring 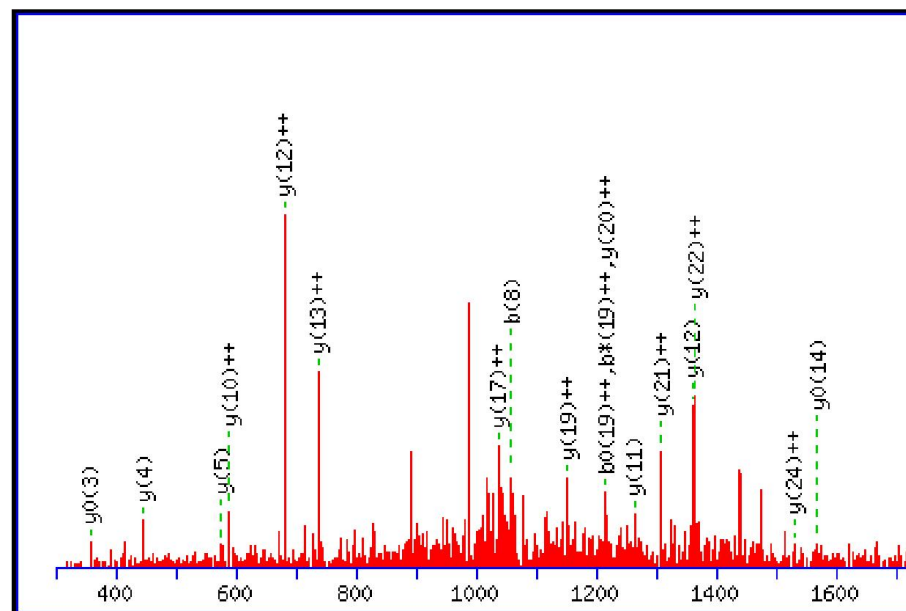

| #  | b                | b <sup>++</sup> | b <sup>*</sup> | b <sup>+</sup>   | b <sup>0</sup> | b <sup>0++</sup> | Seq. | y                | y <sup>++</sup>  | y <sup>*</sup> | y <sup>+</sup> | y <sup>0</sup>   | y <sup>0++</sup> | #  |
|----|------------------|-----------------|----------------|------------------|----------------|------------------|------|------------------|------------------|----------------|----------------|------------------|------------------|----|
| 1  | 116.0342         | 58.5207         |                |                  | 98.0237        | 49.5155          | D    |                  |                  |                |                |                  |                  | 26 |
| 2  | 173.0557         | 87.0315         |                |                  | 155.0451       | 78.0262          | G    | 3116.4517        | 1558.7295        | 3099.4252      | 1550.2162      | 3098.4412        | 1549.7242        | 25 |
| 3  | 371.1925         | 186.0999        | 354.1660       | 177.5866         | 353.1819       | 177.0946         | K    | 3059.4303        | <b>1530.2188</b> | 3042.4037      | 1521.7055      | 3041.4197        | 1521.2135        | 24 |
| 4  | 502.2330         | 251.6201        | 485.2064       | 243.1069         | 484.2224       | 242.6149         | N    | 2861.2934        | 1431.1504        | 2844.2669      | 1422.6371      | 2843.2829        | 1422.1451        | 23 |
| 5  | 617.2599         | 309.1336        | 600.2334       | 300.6203         | 599.2494       | 300.1283         | D    | 2730.2529        | <b>1365.6301</b> | 2713.2264      | 1357.1168      | 2712.2424        | 1356.6248        | 22 |
| 6  | 801.3811         | 401.1942        | 784.3546       | 392.6809         | 783.3706       | 392.1889         | K    | 2615.2260        | <b>1308.1166</b> | 2598.1995      | 1299.6034      | 2597.2154        | 1299.1114        | 21 |
| 7  | 990.4237         | 465.7155        | 913.3972       | 457.2022         | 912.4131       | 456.7102         | E    | 2431.1048        | <b>1216.0561</b> | 2414.0783      | 1207.5428      | 2413.0943        | 1207.0508        | 20 |
| 8  | <b>1059.4663</b> | 530.2368        | 1042.4398      | 521.7235         | 1041.4557      | 521.2315         | E    | 2302.0622        | <b>1151.5348</b> | 2285.0357      | 1143.0215      | 2284.0517        | 1142.5295        | 19 |
| 9  | 1160.5140        | 580.7606        | 1143.4874      | 572.2474         | 1142.5034      | 571.7553         | T    | 2173.0196        | 1087.0135        | 2155.9931      | 1078.5002      | 2155.0091        | 1078.0082        | 18 |
| 10 | 1344.6352        | 672.8212        | 1327.6086      | 664.3079         | 1326.6246      | 663.8159         | K    | 2071.9720        | <b>1036.4836</b> | 2054.9454      | 1027.9763      | 2053.9614        | 1027.4843        | 17 |
| 11 | 1459.6621        | 730.3347        | 1442.6356      | 721.8214         | 1441.6515      | 721.3294         | D    | 1887.8508        | 944.4290         | 1870.8242      | 935.9158       | 1869.8402        | 935.4287         | 16 |
| 12 | 1645.7414        | 823.3743        | 1628.7149      | 814.8611         | 1627.7309      | 814.3691         | W    | 1772.8238        | 886.9156         | 1755.7973      | 878.4023       | 1754.8133        | 877.9103         | 15 |
| 13 | 1758.8255        | 879.9164        | 1741.7989      | 871.4031         | 1740.8149      | 870.9111         | I    | 1586.7445        | 793.8759         | 1569.7180      | 785.3626       | <b>1568.7340</b> | 784.8706         | 14 |
| 14 | 1871.9095        | 936.4584        | 1854.8830      | 927.9451         | 1853.8990      | 927.4531         | L    | 1473.6605        | <b>737.3339</b>  | 1456.6339      | 728.8206       | 1455.6499        | 728.3286         | 13 |
| 15 | 1968.9623        | 984.9848        | 1951.9358      | 976.4715         | 1950.9517      | 975.9795         | P    | <b>1360.5764</b> | <b>680.7918</b>  | 1343.5499      | 672.2786       | 1342.5658        | 671.7866         | 12 |
| 16 | 2055.9943        | 1028.5008       | 2038.9678      | 1019.9875        | 2037.9838      | 1019.4955        | S    | <b>1263.5236</b> | 632.2655         | 1246.4971      | 623.7522       | 1245.5131        | 623.2602         | 11 |
| 17 | 2171.0213        | 1086.0143       | 2153.9947      | 1077.5010        | 2153.0107      | 1077.0090        | D    | 1176.4916        | <b>588.7494</b>  | 1159.4651      | 580.2362       | 1158.4810        | 579.7442         | 10 |
| 18 | 2334.0846        | 1167.5459       | 2317.0581      | 1159.0327        | 2316.0740      | 1158.5407        | Y    | 1061.4647        | 531.2360         | 1044.4381      | 522.7227       | 1043.4541        | 522.2307         | 9  |
| 19 | 2449.1116        | 1225.0594       | 2432.0850      | <b>1216.5461</b> | 2431.1010      | <b>1216.0541</b> | D    | 898.4013         | 449.7043         | 881.3748       | 441.1910       | 880.3908         | 440.6990         | 8  |
| 20 | 2586.1705        | 1293.5889       | 2569.1439      | 1285.0756        | 2568.1599      | 1284.5836        | H    | 783.3744         | 392.1908         | 766.3478       | 383.6776       | 765.3638         | 383.1856         | 7  |
| 21 | 2657.2076        | 1329.1074       | 2640.1810      | 1320.5942        | 2639.1970      | 1320.1021        | A    | 646.3155         | 323.6614         | 629.2889       | 315.1481       | 628.3049         | 314.6561         | 6  |
| 22 | 2786.2502        | 1393.6287       | 2769.2236      | 1385.1154        | 2768.2396      | 1384.6234        | E    | <b>575.2784</b>  | 288.1428         | 558.2518       | 279.6295       | 557.2678         | 279.1375         | 5  |
| 23 | 2857.2873        | 1429.1473       | 2840.2607      | 1420.6340        | 2839.2787      | 1420.1420        | A    | <b>446.2358</b>  | 223.6215         | 429.2092       | 215.1083       | 428.2252         | 214.6162         | 4  |
| 24 | 2986.3299        | 1493.6686       | 2969.3033      | 1485.1553        | 2968.3193      | 1484.6633        | E    | 375.1987         | 188.1030         | 358.1721       | 179.5897       | <b>357.1881</b>  | 179.0977         | 3  |
| 25 | 3057.3670        | 1529.1871       | 3040.3404      | 1520.6739        | 3039.3564      | 1520.1819        | A    | 246.1561         | 123.5817         | 229.1295       | 115.0684       |                  | 115.0684         | 2  |
| 26 |                  |                 |                |                  |                |                  | R    | 175.1190         | 88.0631          | 158.0924       | 79.5498        |                  |                  | 1  |

Monoisotopic mass of neutral peptide Mr(calc): 3230.4713

Fixed modifications: Carbamidomethyl (C) (apply to specified)

Variable modifications:

K3 : Propionyl-Methylation (K)

K6 : Propionyl (K)

K10 : Propionyl (K)

Ions Score: 32 Expect: 0.17

Matches : 18/292 fragment ions using 34 most intense peaks

Match to Query 8656: 1480.718368 from(741.366460,2+) intensity(77073.6719)

Title: File1284 Spectrum5157 scans: 5675

Data file I:\2013-9-12-Hela-Prometh-Fr9-ZW.mgf

Click mouse within plot area to zoom in by factor of two about that point

Or,   to  Da Label all possible matches  Label matches used for scoring 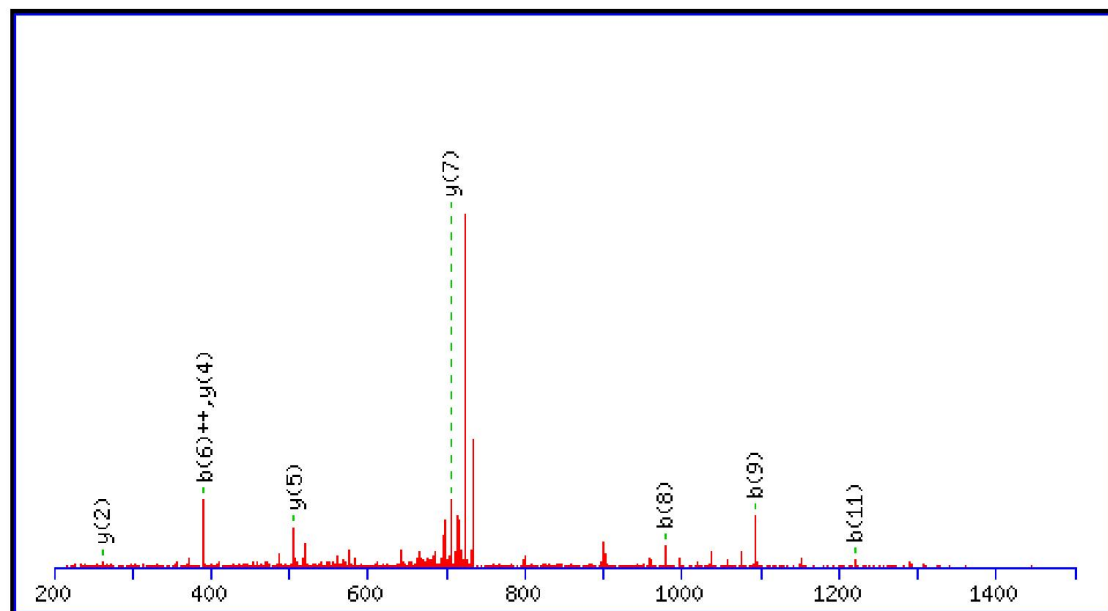Monoisotopic mass of neutral peptide **Mr(calc): 1480.7100**

Fixed modifications: Carbamidomethyl (C) (apply to specified)

Variable modifications:

**K6** : Propionyl-(13CD3)Methyl (K)

Ions Score: 22 Expect: 2.6

Matches : 8/130 fragment ions using 13 most intense peaks (he

| #  | m/z       | b <sup>++</sup> | b*        | b <sup>+++</sup> | b <sup>0</sup> | b <sup>0++</sup> | Seq. | y         | y <sup>++</sup> | y*        | y <sup>+++</sup> | y <sup>0</sup> | y <sup>0++</sup> | #  |
|----|-----------|-----------------|-----------|------------------|----------------|------------------|------|-----------|-----------------|-----------|------------------|----------------|------------------|----|
| 1  | 132.0478  | 66.5275         |           |                  |                |                  | I    |           |                 |           |                  |                |                  | 13 |
| 2  | 219.0798  | 110.0435        |           |                  | 201.0692       | 101.0382         | S    | 1350.6768 | 675.8421        | 1333.6503 | 667.3288         | 1332.6663      | 666.8368         | 12 |
| 3  | 332.1639  | 166.5856        |           |                  | 314.1533       | 157.5803         | L    | 1263.6448 | 632.3260        | 1246.6183 | 623.8128         | 1245.6342      | 623.3208         | 11 |
| 4  | 447.1908  | 224.0990        |           |                  | 429.1802       | 215.0938         | D    | 1150.5607 | 575.7840        | 1133.5342 | 567.2707         | 1132.5502      | 566.7787         | 10 |
| 5  | 576.2334  | 288.6203        |           |                  | 558.2228       | 279.6151         | E    | 1035.5338 | 518.2705        | 1018.5072 | 509.7573         | 1017.5232      | 509.2653         | 9  |
| 6  | 778.3924  | 389.6998        | 761.3659  | 381.1866         | 760.3818       | 380.6946         | K    | 906.4912  | 453.7492        | 889.4647  | 445.2360         | 888.4806       | 444.7440         | 8  |
| 7  | 849.4295  | 425.2184        | 832.4030  | 416.7051         | 831.4190       | 416.2131         | A    | 704.3322  | 352.6697        | 687.3056  | 344.1565         | 686.3216       | 343.6645         | 7  |
| 8  | 977.4881  | 489.2477        | 960.4615  | 480.7344         | 959.4775       | 480.2424         | Q    | 633.2951  | 317.1512        | 616.2685  | 308.6379         | 615.2845       | 308.1459         | 6  |
| 9  | 1092.5150 | 546.7612        | 1075.4885 | 538.2479         | 1074.5045      | 537.7559         | D    | 505.2365  | 253.1219        | 488.2100  | 244.6086         | 487.2259       | 244.1166         | 5  |
| 10 | 1163.5522 | 582.2797        | 1146.5256 | 573.7664         | 1145.5416      | 573.2744         | A    | 390.2096  | 195.6084        | 373.1830  | 187.0951         | 372.1990       | 186.6031         | 4  |
| 11 | 1220.5736 | 610.7904        | 1203.5471 | 602.2772         | 1202.5630      | 601.7852         | G    | 319.1724  | 160.0899        | 302.1459  | 151.5766         | 301.1619       | 151.0846         | 3  |
| 12 | 1307.6056 | 654.3065        | 1290.5791 | 645.7932         | 1289.5951      | 645.3012         | S    | 262.1510  | 131.5791        | 245.1244  | 123.0659         | 244.1404       | 122.5738         | 2  |
| 13 |           |                 |           |                  |                |                  | R    | 175.1190  | 88.0631         | 158.0924  | 79.5438          |                |                  | 1  |

Match to Query 10368: 1606.914528 from(804.464540, 2+) intensity(127834.1016)

Title: File1284 Spectrum6161 scans: 6721

Data file I:\2013-9-12-Hela-Prometh-Fr9-ZW.mgf

Click mouse within plot area to zoom in by factor of two about that point

Or,   to  Da Label all possible matches  Label matches used for scoring 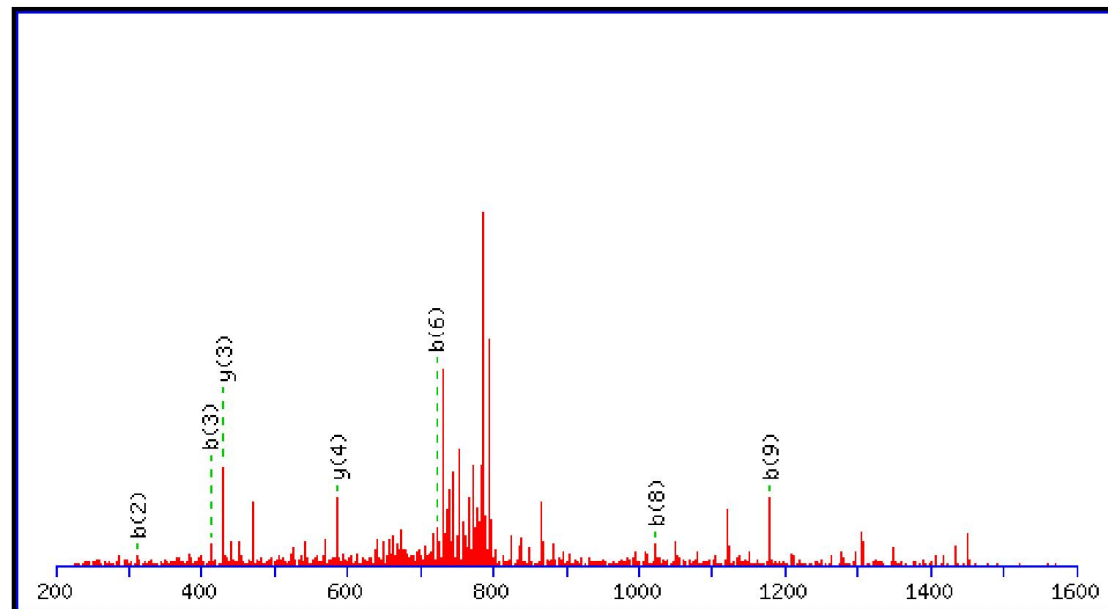**Monoisotopic mass of neutral peptide Mr(calc):** 1606.9195**Fixed modifications:** Carbamidomethyl (C) (apply to specified residues or termini only)**Variable modifications:****K2** : Propionyl-Methylation (K)**K12** : Propionyl-Methylation (K)**Ions Score:** 24 **Expect:** 3.1**Matches** : 7/108 fragment ions using 14 most intense peaks

| #  | b                | b <sup>++</sup> | b <sup>+</sup> | b <sup>++</sup> | b <sup>0</sup> | b <sup>0++</sup> | Seq. | y               | y <sup>++</sup> | y <sup>*</sup> | y <sup>++</sup> | y <sup>0</sup> | y <sup>0++</sup> | #  |
|----|------------------|-----------------|----------------|-----------------|----------------|------------------|------|-----------------|-----------------|----------------|-----------------|----------------|------------------|----|
| 1  | 114.0913         | 57.5493         |                |                 |                |                  | I    |                 |                 |                |                 |                |                  | 12 |
| 2  | <b>312.2282</b>  | 156.6177        | 295.2016       | 148.1044        |                |                  | K    | 1494.8427       | 747.9250        | 1477.8162      | 739.4117        | 1476.8322      | 738.9197         | 11 |
| 3  | <b>411.2966</b>  | 206.1519        | 394.2700       | 197.6387        |                |                  | V    | 1296.7059       | 648.8566        | 1279.6793      | 640.3433        | 1278.6953      | 639.8513         | 10 |
| 4  | 508.3493         | 254.6733        | 491.3228       | 246.1650        |                |                  | P    | 1197.6375       | 599.3224        | 1180.6109      | 590.8091        | 1179.6269      | 590.3171         | 9  |
| 5  | 607.4178         | 304.2125        | 590.3912       | 295.6992        |                |                  | V    | 1100.5847       | 550.7960        | 1083.5582      | 542.2827        | 1082.5742      | 541.7907         | 8  |
| 6  | <b>722.4447</b>  | 361.7260        | 705.4182       | 353.2127        | 704.4341       | 352.7207         | D    | 1001.5163       | 501.2618        | 984.4398       | 492.7485        | 983.5057       | 492.2565         | 7  |
| 7  | 908.5240         | 454.7656        | 891.4975       | 446.2524        | 890.5135       | 445.7604         | W    | 886.4894        | 443.7483        | 869.4628       | 435.2350        |                |                  | 6  |
| 8  | <b>1022.5669</b> | 511.7871        | 1005.5404      | 503.2738        | 1004.5564      | 502.7818         | N    | 700.4100        | 350.7087        | 683.3835       | 342.1954        |                |                  | 5  |
| 9  | <b>1178.6681</b> | 589.8377        | 1161.6415      | 581.3244        | 1160.6575      | 580.8324         | R    | <b>586.3671</b> | 293.6872        | 569.3406       | 285.1739        |                |                  | 4  |
| 10 | 1277.7365        | 639.3719        | 1260.7099      | 630.8586        | 1259.7259      | 630.3666         | V    | <b>430.2660</b> | 215.6366        | 413.2395       | 207.1234        |                |                  | 3  |
| 11 | 1391.7794        | 696.3933        | 1374.7528      | 687.8801        | 1373.7638      | 687.3881         | N    | 331.1976        | 166.1024        | 314.1710       | 157.5892        |                |                  | 2  |
| 12 |                  |                 |                |                 |                |                  | K    | 217.1547        | 109.0810        | 200.1281       | 100.5677        |                |                  | 1  |

Match to Query 4008: 1130.563328 from(566.288940, 2+) intensity(57499.6953)

Title: File1284 Spectrum12379 scans: 13198

Data file I:\2013-9-12-Hela-Prometh-Fr9-ZW.mgf

Click mouse within plot area to zoom in by factor of two about that point

Or,   to  Da Label all possible matches  Label matches used for scoring 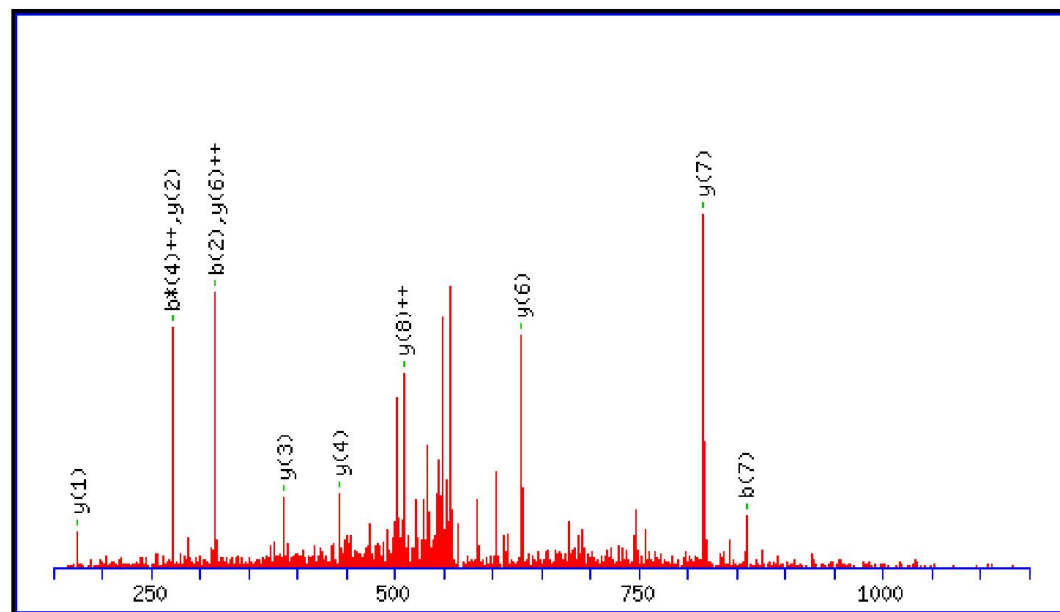**Monoisotopic mass of neutral peptide Mr(calc):** 1130.5629**Fixed modifications:** Carbamidomethyl (C) (apply to specified residues or termini only)**Variable modifications:****N-term :** Acetyl (Protein N-term)**K2 :** Propionyl-(13CD3)Methyl (K)**Ions Score:** 25 **Expect:** 1.1**Matches :** 11/82 fragment ions using 30 most intens

| # | b               | b <sup>++</sup> | b*       | b <sup>++</sup> * | b <sup>0</sup> | b <sup>0++</sup> | Seq. | y               | y <sup>++</sup> | y*        | y <sup>++</sup> * | y <sup>0</sup> | y <sup>0++</sup> | # |
|---|-----------------|-----------------|----------|-------------------|----------------|------------------|------|-----------------|-----------------|-----------|-------------------|----------------|------------------|---|
| 1 | 114.0550        | 57.5311         |          |                   |                |                  | A    |                 |                 |           |                   |                |                  | 9 |
| 2 | <b>316.2140</b> | 158.6106        | 299.1874 | 150.0973          |                |                  | K    | 1018.5225       | <b>509.7649</b> | 1001.4960 | 501.2516          | 1000.5119      | 500.7596         | 8 |
| 3 | 502.2933        | 251.6503        | 485.2667 | 243.1370          |                |                  | W    | <b>816.3635</b> | 408.6854        | 799.3369  | 400.1721          | 798.3529       | 399.6801         | 7 |
| 4 | 559.3147        | 280.1610        | 542.2882 | <b>271.6477</b>   |                |                  | G    | <b>630.2842</b> | <b>315.6457</b> | 613.2576  | 307.1325          | 612.2736       | 306.6404         | 6 |
| 5 | 688.3573        | 344.6823        | 671.3308 | 336.1690          | 670.3468       | 335.6770         | E    | 573.2627        | 287.1350        | 556.2362  | 278.6217          | 555.2522       | 278.1297         | 5 |
| 6 | 745.3788        | 373.1930        | 728.3523 | 364.6798          | 727.3682       | 364.1878         | G    | <b>444.2201</b> | 222.6137        | 427.1936  | 214.1004          | 426.2096       | 213.6084         | 4 |
| 7 | <b>860.4057</b> | 430.7065        | 843.3792 | 422.1932          | 842.3952       | 421.7012         | D    | <b>387.1987</b> | 194.1030        | 370.1721  | 185.5897          | 369.1881       | 185.0977         | 3 |
| 8 | 957.4585        | 479.2329        | 940.4320 | 470.7196          | 939.4479       | 470.2276         | P    | <b>272.1717</b> | 136.5895        | 255.1452  | 128.0762          |                |                  | 2 |
| 9 |                 |                 |          |                   |                |                  | R    | <b>175.1190</b> | 88.0631         | 158.0924  | 79.5498           |                |                  | 1 |

MS/MS Fragmentation of **KEAKER**Found in **Q8WUQ7**, Cactin OS=Homo sapiens GN=CACTIN PE=1 SV=3

Match to Query 832: 833.487468 from(417.751010,2+) intensity(111378.0000)

Title: File1284 Spectrum4600 scans: 5095

Data file I:\2013-9-12-Hela-Prometh-Fr9-ZW.mgf

Click mouse within plot area to zoom in by factor of two about that point

Or,   to  Da Label all possible matches  Label matches used for scoring 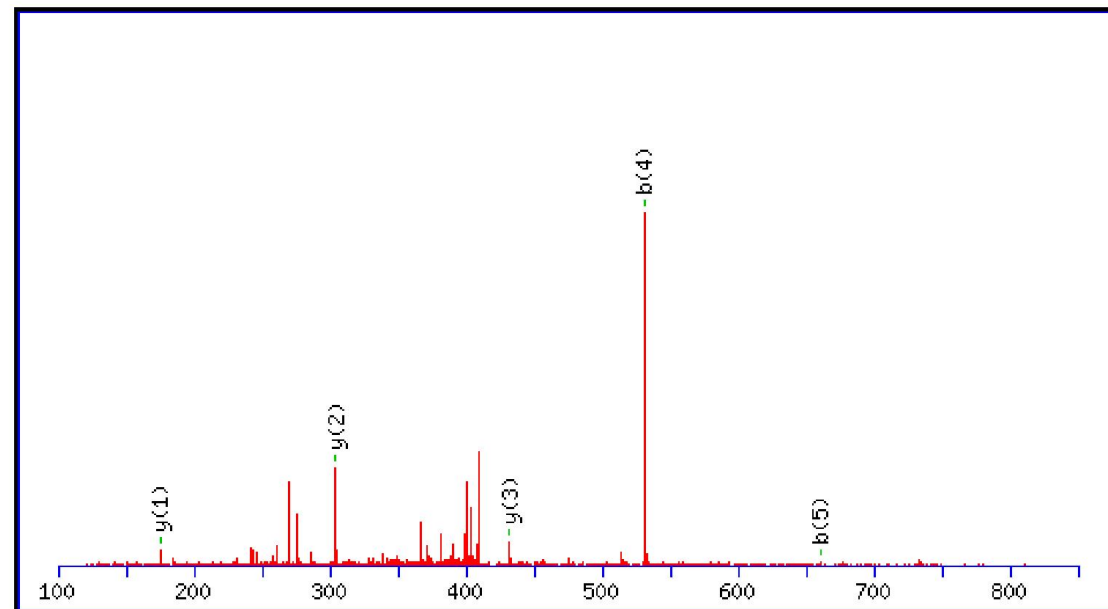**Monoisotopic mass of neutral peptide Mr(calc):** 833.4879**Fixed modifications:** Carbamidomethyl (C) (apply to specified residues or termini only)**Variable modifications:**

K1 : Propionyl-(13CD3)Methyl (K)

**Ions Score:** 23 **Expect:** 1.8**Matches :** 5/56 fragment ions using 7 most

| # | b               | b <sup>++</sup> | b*       | b <sup>+++</sup> | b <sup>0</sup> | b <sup>0++</sup> | Seq. | y               | y <sup>++</sup> | y*       | y <sup>+++</sup> | y <sup>0</sup> | y <sup>0++</sup> | # |
|---|-----------------|-----------------|----------|------------------|----------------|------------------|------|-----------------|-----------------|----------|------------------|----------------|------------------|---|
| 1 | 203.1663        | 102.0868        | 186.1397 | 93.5735          |                |                  | K    |                 |                 |          |                  |                |                  | 6 |
| 2 | 332.2089        | 166.6081        | 315.1823 | 158.0948         | 314.1983       | 157.6028         | E    | 632.3362        | 316.6717        | 615.3097 | 308.1585         | 614.3257       | 307.6665         | 5 |
| 3 | 403.2460        | 202.1266        | 386.2194 | 193.6134         | 385.2354       | 193.1214         | A    | 503.2936        | 252.1504        | 486.2671 | 243.6372         | 485.2831       | 243.1452         | 4 |
| 4 | <b>531.3410</b> | 266.1741        | 514.3144 | 257.6608         | 513.3304       | 257.1688         | K    | <b>432.2565</b> | 216.6319        | 415.2300 | 208.1186         | 414.2459       | 207.6266         | 3 |
| 5 | <b>660.3836</b> | 330.6954        | 643.3570 | 322.1821         | 642.3730       | 321.6901         | E    | <b>304.1615</b> | 152.5844        | 287.1350 | 144.0711         | 286.1510       | 143.5791         | 2 |
| 6 |                 |                 |          |                  |                |                  | R    | <b>175.1190</b> | 88.0631         | 158.0924 | 79.5498          |                |                  | 1 |

Found in **Q99986**, Serine/threonine-protein kinase VRK1 OS=Homo sapiens GN=VRK1 PE=1 SV=1

Match to Query 1176: 873.530668 from(437.772610, 2+) intensity(58982.7031)

Title: File1284 Spectrum2177 scans: 2565

Data file I:\2013-9-12-Hela-Prometh-Fr9-ZW.mgf

Click mouse within plot area to zoom in by factor of two about that point

Or,   to  Da Label all possible matches  Label matches used for scoring 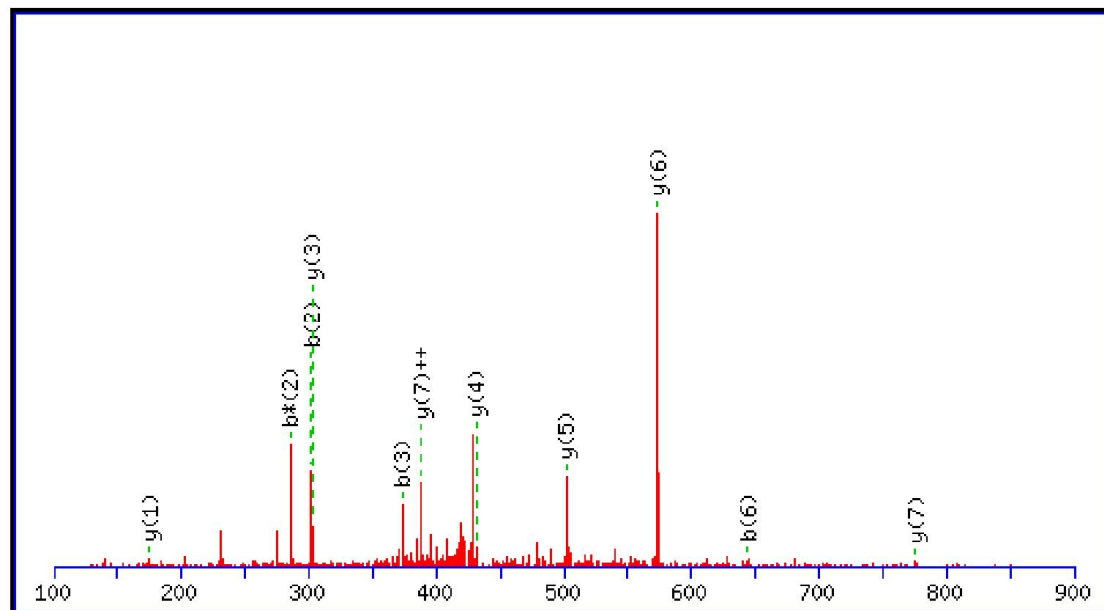**Monoisotopic mass of neutral peptide Mr(calc):** 873.5305**Fixed modifications:** Carbamidomethyl (C) (apply to specified residues or**Variable modifications:****K2** : Propionyl-(13CD3)Methyl (K)**Ions Score:** 31 **Expect:** 0.24**Matches** : 11/54 fragment ions using 30 most intense peaks ([help](#))

| # | b               | b <sup>++</sup> | b*              | b <sup>+++</sup> | Seq. | y               | y <sup>++</sup> | y*       | y <sup>+++</sup> | # |
|---|-----------------|-----------------|-----------------|------------------|------|-----------------|-----------------|----------|------------------|---|
| 1 | 100.0757        | 50.5415         |                 |                  | V    |                 |                 |          |                  | 8 |
| 2 | <b>302.2347</b> | 151.6210        | <b>285.2082</b> | 143.1077         | K    | <b>775.4693</b> | <b>388.2383</b> | 758.4428 | 379.7250         | 7 |
| 3 | <b>373.2718</b> | 187.1395        | 356.2453        | 178.6263         | A    | <b>573.3103</b> | 287.1588        | 556.2838 | 278.6455         | 6 |
| 4 | 444.3089        | 222.6581        | 427.2824        | 214.1448         | A    | <b>502.2732</b> | 251.6402        | 485.2467 | 243.1270         | 5 |
| 5 | 572.3675        | 286.6874        | 555.3410        | 278.1741         | Q    | <b>431.2361</b> | 216.1217        | 414.2096 | 207.6084         | 4 |
| 6 | <b>643.4046</b> | 322.2059        | 626.3781        | 313.6927         | A    | <b>303.1775</b> | 152.0924        | 286.1510 | 143.5791         | 3 |
| 7 | 700.4261        | 350.7167        | 683.3995        | 342.2034         | G    | 232.1404        | 116.5738        | 215.1139 | 108.0606         | 2 |
| 8 |                 |                 |                 |                  | R    | <b>175.1190</b> | 88.0631         | 158.0924 | 79.5498          | 1 |

Match to Query 134: 728.454268 from(365.234410, 2+) intensity(67997.4141)

Title: File1284 Spectrum5448 scans: 5978

Data file I:\2013-9-12-Hela-Prometh-Fr9-ZW.mgf

Click mouse within plot area to zoom in by factor of two about that point

Or,   to  Da Label all possible matches  Label matches used for scoring 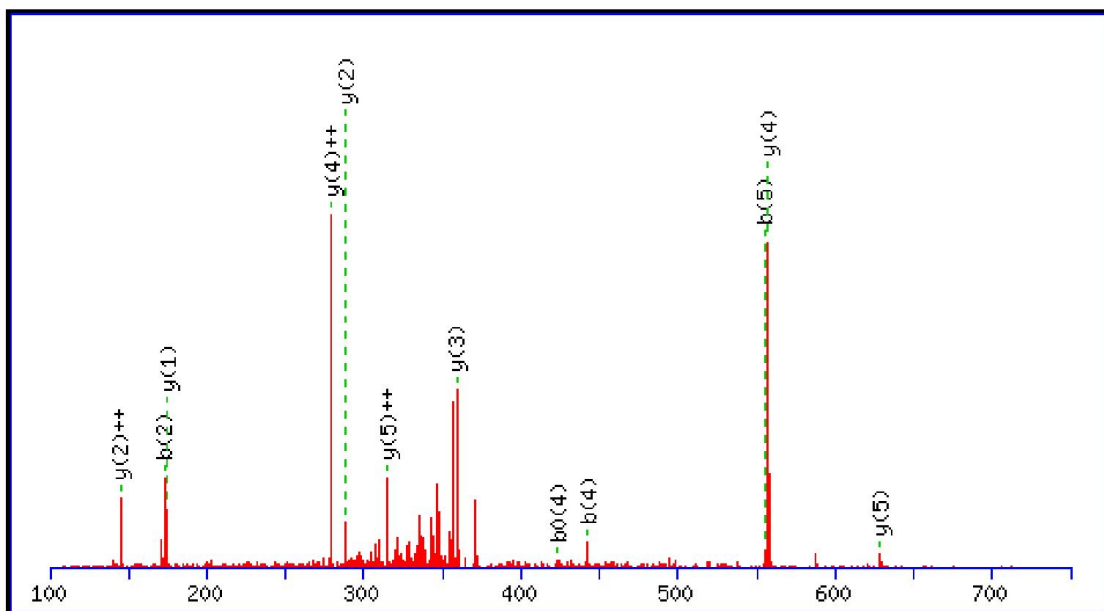**Monoisotopic mass of neutral peptide Mr(calc):** 728.4545**Fixed modifications:** Carbamidomethyl (C) (apply to specified residues or termini only)**Variable modifications:****K3** : Propionyl-Methylation (K)**Ions Score:** 42 **Expect:** 0.036**Matches :** 12/46 fragment ions using 19 most intens

| # | b               | b <sup>++</sup> | b <sup>*</sup> | b <sup>*++</sup> | b <sup>0</sup>  | b <sup>0++</sup> | Seq. | y               | y <sup>++</sup> | y <sup>*</sup> | y <sup>*++</sup> | # |
|---|-----------------|-----------------|----------------|------------------|-----------------|------------------|------|-----------------|-----------------|----------------|------------------|---|
| 1 | 102.0550        | 51.5311         |                |                  | 84.0444         | 42.5258          | T    |                 |                 |                |                  | 6 |
| 2 | <b>173.0921</b> | 87.0497         |                |                  | 155.0815        | 78.0444          | A    | <b>628.4141</b> | <b>314.7107</b> | 611.3875       | 306.1974         | 5 |
| 3 | 371.2289        | 186.1181        | 354.2023       | 177.6048         | 353.2183        | 177.1128         | K    | <b>557.3770</b> | <b>279.1921</b> | 540.3504       | 270.6788         | 4 |
| 4 | <b>442.2660</b> | 221.6366        | 425.2395       | 213.1234         | <b>424.2554</b> | 212.6314         | A    | <b>359.2401</b> | 180.1237        | 342.2136       | 171.6104         | 3 |
| 5 | <b>555.3501</b> | 278.1787        | 538.3235       | 269.6654         | 537.3395        | 269.1734         | L    | <b>288.2030</b> | <b>144.6051</b> | 271.1765       | 136.0919         | 2 |
| 6 |                 |                 |                |                  |                 |                  | R    | <b>175.1190</b> | 88.0631         | 158.0924       | 79.5498          | 1 |



MS/MS Fragmentation of **EEIEKQALEKSKR**Found in **J3KP06**, LIM domain only protein 7 OS=Homo sapiens GN=LMO7 PE=4 SV=1

Match to Query 13253: 1768.958108 from(885.486330,2+) intensity(98777.8906)

Title: File1335 Spectrum13992 scans: 15047

Data file I:\2013-9-14-Hela-Prometh-Fr8-ZW.mgf

Click mouse within plot area to zoom in by factor of two about that point

Or,   to  Da Label all possible matches  Label matches used for scoring 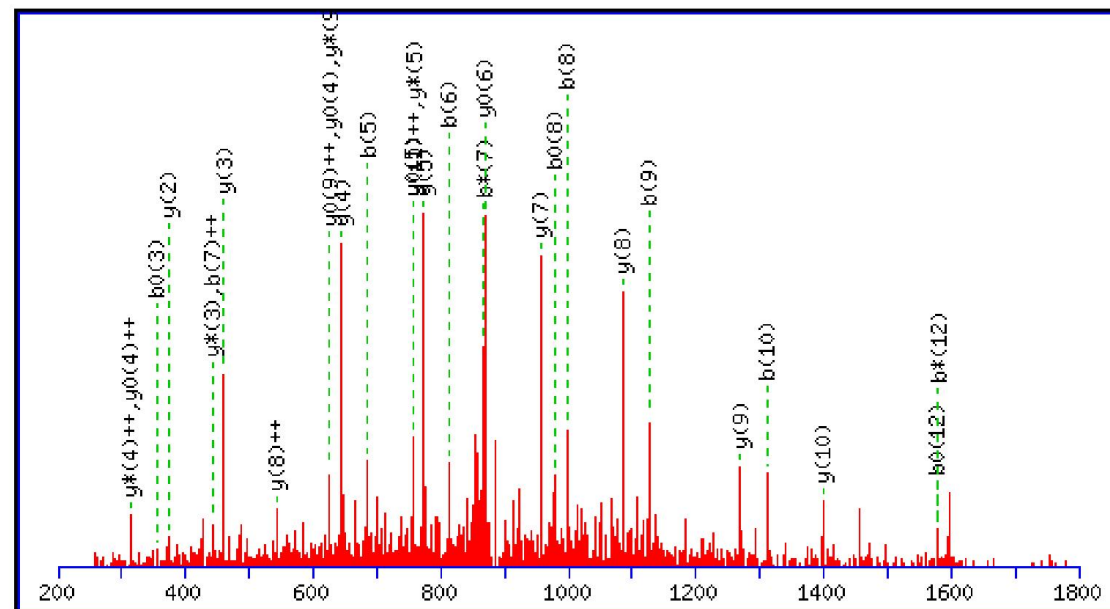**Monoisotopic mass of neutral peptide Mr(calc):****Fixed modifications:** Carbamidomethyl (C) (apply**Variable modifications:****K5** : Propionyl (K)**K10** : Propionyl (K)**K12** : Propionyl-Methylation (K)**Ions Score:** 39 **Expect:** 0.15**Matches** : 30/132 fragment ions using 47 most inter

| #  | b                | b <sup>++</sup> | b <sup>*</sup> | b <sup>+++</sup> | b <sup>0</sup> | b <sup>0++</sup> | Seq. | y                | y <sup>++</sup> | y <sup>*</sup> | y <sup>+++</sup> | y <sup>0</sup> | y <sup>0++</sup> | #  |
|----|------------------|-----------------|----------------|------------------|----------------|------------------|------|------------------|-----------------|----------------|------------------|----------------|------------------|----|
| 1  | 130.0499         | 65.4286         |                |                  | 112.0393       | 56.5233          | E    |                  |                 |                |                  |                |                  | 13 |
| 2  | 259.0925         | 130.0499        |                |                  | 241.0819       | 121.0446         | E    | 1640.9218        | 820.9645        | 1623.8952      | 812.4512         | 1622.9112      | 811.9592         | 12 |
| 3  | 372.1765         | 186.5919        |                |                  | 354.1660       | 177.5866         | I    | 1511.8792        | 756.4432        | 1494.8526      | 747.9299         | 1493.8686      | 747.4379         | 11 |
| 4  | 501.2191         | 251.1132        |                |                  | 483.2086       | 242.1079         | E    | <b>1398.7951</b> | 699.9012        | 1381.7686      | 691.3879         | 1380.7845      | 690.8959         | 10 |
| 5  | <b>685.3403</b>  | 343.1738        | 668.3137       | 334.6605         | 667.3297       | 334.1685         | K    | <b>1269.7525</b> | 635.3799        | 1252.7260      | 626.8666         | 1251.7419      | 626.3746         | 9  |
| 6  | <b>813.3989</b>  | 407.2031        | 796.3723       | 398.6898         | 795.3883       | 398.1978         | Q    | <b>1085.6313</b> | 543.3193        | 1068.6048      | 534.8060         | 1067.6208      | 534.3140         | 8  |
| 7  | 884.4360         | 442.7216        | 867.4094       | 434.2084         | 866.4254       | 433.7164         | A    | <b>957.5728</b>  | 479.2900        | 940.5462       | 470.7767         | 939.5622       | 470.2847         | 7  |
| 8  | <b>997.5201</b>  | 499.2637        | 980.4935       | 490.7504         | 979.5095       | 490.2584         | L    | 886.5356         | 443.7715        | 869.5091       | 435.2582         | 868.5251       | 434.7662         | 6  |
| 9  | <b>1126.5626</b> | 563.7850        | 1109.5361      | 555.2717         | 1108.5521      | 554.7797         | E    | <b>773.4516</b>  | 387.2294        | 756.4250       | 378.7162         | 755.4410       | 378.2241         | 5  |
| 10 | <b>1310.6838</b> | 655.8456        | 1293.6573      | 647.3323         | 1292.6733      | 646.8403         | K    | <b>644.4090</b>  | 322.7081        | 627.3824       | 314.1949         | 626.3984       | 313.7028         | 4  |
| 11 | 1397.7159        | 699.3616        | 1380.6893      | 690.8483         | 1379.7053      | 690.3563         | S    | <b>460.2878</b>  | 230.6475        | 443.2613       | 222.1343         | 442.2772       | 221.6423         | 3  |
| 12 | 1595.8527        | 798.4300        | 1578.8261      | 789.9167         | 1577.8421      | 789.4247         | K    | <b>373.2558</b>  | 187.1315        | 356.2292       | 178.6183         |                |                  | 2  |
| 13 |                  |                 |                |                  |                |                  | R    | 175.1190         | 88.0631         | 158.0924       | 79.5498          |                |                  | 1  |

Match to [Query 17355: 2261.124128 from(1131.569340, 2+) intensity(220357.1875)

Title: File1335 Spectrum15418 scans: 16533

Data file I:\2013-9-14-Hela-Prometh-Fr8-ZW.mgf

Click mouse within plot area to zoom in by factor of two about that point

Or,   to  Da Label all possible matches  Label matches used for scoring 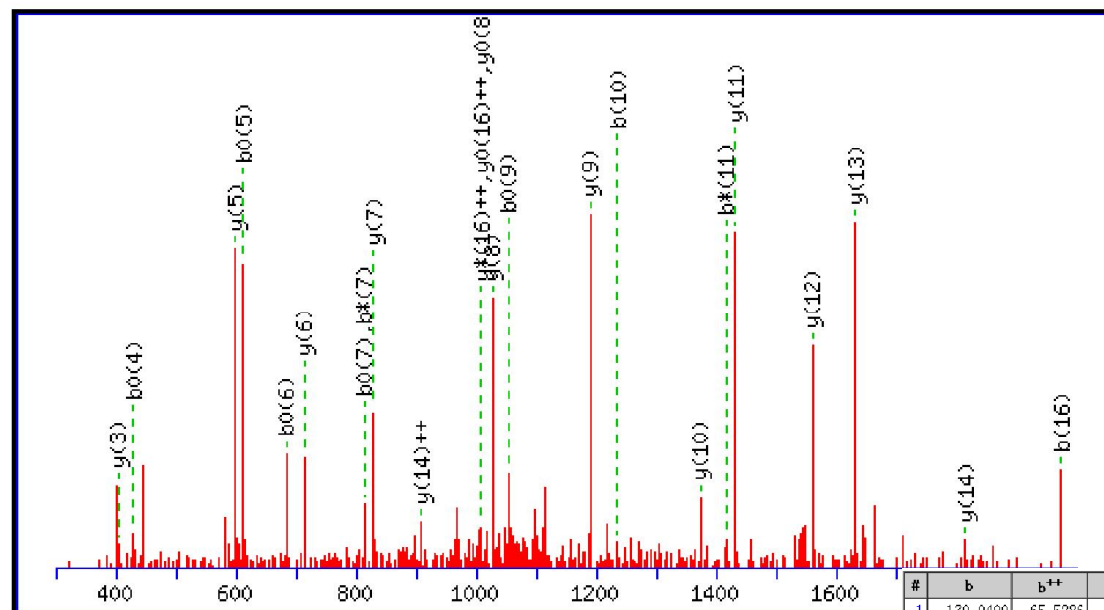Monoisotopic mass of neutral peptide  $M_r(\text{calc})$ : 2261.1216

Fixed modifications: Carbamidomethyl (C) (apply to specified

Variable modifications:

K5 : Propionyl (K)

K9 : Propionyl (K)

K11 : Propionyl-Methylation (K)

Ions Score: 69 Expect: 0.00015

Matches : 24/192 fragment ions using 34 most intense peaks

| #  | b         | b <sup>++</sup> | b <sup>+</sup> | b <sup>+++</sup> | b <sup>0</sup> | b <sup>0++</sup> | Seq. | y         | y <sup>++</sup> | y <sup>+</sup> | y <sup>+++</sup> | y <sup>0</sup> | y <sup>0++</sup> | #  |
|----|-----------|-----------------|----------------|------------------|----------------|------------------|------|-----------|-----------------|----------------|------------------|----------------|------------------|----|
| 1  | 130.0499  | 65.5286         |                |                  | 112.0393       | 56.5233          | E    |           |                 |                |                  |                |                  | 18 |
| 2  | 227.1026  | 114.0550        |                |                  | 209.0921       | 105.0497         | P    | 2133.0863 | 1067.0468       | 2116.0597      | 1058.5335        | 2115.0757      | 1058.0415        | 17 |
| 3  | 384.1241  | 142.5657        |                |                  | 266.1135       | 133.5604         | G    | 2036.0335 | 1018.5204       | 2019.0070      | 1010.0071        | 2018.0229      | 1009.5151        | 16 |
| 4  | 447.1874  | 224.0974        |                |                  | 429.1769       | 215.0921         | Y    | 1979.0120 | 990.0097        | 1961.9855      | 981.4964         | 1961.0015      | 981.0044         | 15 |
| 5  | 631.3086  | 316.1579        | 614.2821       | 307.6447         | 613.2980       | 307.1527         | K    | 1815.9487 | 908.4780        | 1798.9222      | 899.9647         | 1797.9381      | 899.4727         | 14 |
| 6  | 702.3457  | 351.6765        | 685.3192       | 343.1632         | 684.3352       | 342.6712         | A    | 1631.8275 | 816.4174        | 1614.8010      | 807.9041         | 1613.8170      | 807.4121         | 13 |
| 7  | 831.3883  | 416.1978        | 814.3618       | 407.6845         | 813.3777       | 407.1925         | E    | 1560.7904 | 780.8988        | 1543.7639      | 772.3856         | 1542.7799      | 771.8936         | 12 |
| 8  | 888.4098  | 444.7085        | 871.3832       | 436.1953         | 870.3992       | 435.7032         | G    | 1431.7478 | 716.3775        | 1414.7213      | 707.8643         | 1413.7373      | 707.3723         | 11 |
| 9  | 1072.5310 | 536.7691        | 1055.5044      | 528.2558         | 1054.5204      | 527.7638         | K    | 1374.7264 | 687.8668        | 1357.6998      | 679.3535         | 1356.7158      | 678.8615         | 10 |
| 10 | 1235.5943 | 618.3008        | 1218.5677      | 609.7875         | 1217.5837      | 609.2955         | Y    | 1190.6052 | 595.8062        | 1173.5786      | 587.2930         | 1172.5946      | 586.8009         | 9  |
| 11 | 1433.7311 | 717.3692        | 1416.7046      | 708.8559         | 1415.7205      | 708.3639         | K    | 1027.5419 | 514.2746        | 1010.5153      | 505.7613         | 1009.5313      | 505.2693         | 8  |
| 12 | 1548.7581 | 774.8827        | 1531.7315      | 766.3694         | 1530.7475      | 765.8774         | D    | 829.4050  | 415.2061        | 812.3785       | 406.6929         | 811.3945       | 406.2009         | 7  |
| 13 | 1663.7850 | 832.3961        | 1646.7584      | 823.8829         | 1645.7744      | 823.3909         | D    | 714.3781  | 357.6927        | 697.3515       | 349.1794         | 696.3675       | 348.6874         | 6  |
| 14 | 1760.8378 | 880.9225        | 1743.8112      | 872.4092         | 1742.8272      | 871.9172         | P    | 599.3511  | 300.1792        | 582.3246       | 291.6659         | 581.3406       | 291.1739         | 5  |
| 15 | 1859.9062 | 930.4567        | 1842.8796      | 921.9435         | 1841.8956      | 921.4514         | V    | 502.2984  | 251.6528        | 485.2718       | 243.1395         | 484.2878       | 242.6475         | 4  |
| 16 | 1974.9331 | 987.9702        | 1957.9066      | 979.4569         | 1956.9226      | 978.9649         | D    | 403.3300  | 202.1186        | 386.2034       | 193.6053         | 385.2194       | 193.1133         | 3  |
| 17 | 2088.0172 | 1044.5122       | 2070.9806      | 1035.9990        | 2070.0066      | 1035.5069        | L    | 288.2030  | 144.6051        | 271.1765       | 136.0919         |                |                  | 2  |
| 18 |           |                 |                |                  |                |                  | R    | 175.1190  | 88.0631         | 158.0924       | 79.5498          |                |                  | 1  |

Found in **152987**, Ubiquitin-60S ribosomal protein L40 OS=Homo sapiens GN=UBA52 PE=1 SV=2

Match to Query 369: 766.379928 from(384.197240, 2+) intensity(2831251.5000)

Title: File1335 Spectrum3580 scans: 4199

Data file I:\2013-9-14-Hela-Prometh-Fr8-ZW.mgf

Click mouse within plot area to zoom in by factor of two about that point

Or,   to  Da Label all possible matches  Label matches used for scoring 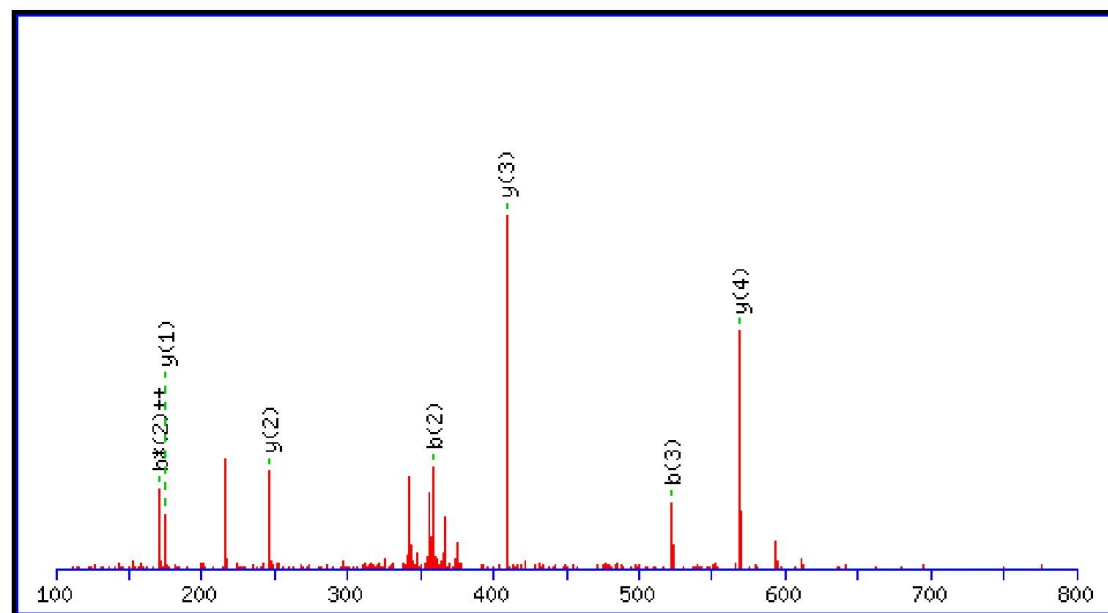**Monoisotopic mass of neutral peptide Mr(calc):** 766.3796**Fixed modifications:** Carbamidomethyl (C) (apply to specified residues or termini only)**Variable modifications:****K1** : Propionyl-Methylation (K)**Ions Score:** 28 **Expect:** 0.25**Matches** : 7/32 fragment ions using 13 most

| # | b               | b <sup>++</sup> | b <sup>+</sup> | b <sup>++</sup> | Seq.     | y               | y <sup>++</sup> | y <sup>+</sup> | y <sup>++</sup> | #        |
|---|-----------------|-----------------|----------------|-----------------|----------|-----------------|-----------------|----------------|-----------------|----------|
| 1 | 199.1441        | 100.0757        | 182.1176       | 91.5624         | <b>K</b> |                 |                 |                |                 | <b>5</b> |
| 2 | <b>359.1748</b> | 180.0910        | 342.1482       | <b>171.5777</b> | <b>C</b> | <b>569.2500</b> | 285.1287        | 552.2235       | 276.6154        | <b>4</b> |
| 3 | <b>522.2381</b> | 261.6227        | 505.2115       | 253.1094        | <b>Y</b> | <b>409.2194</b> | 205.1133        | 392.1928       | 196.6001        | <b>3</b> |
| 4 | 593.2752        | 297.1412        | 576.2486       | 288.6280        | <b>A</b> | <b>246.1561</b> | 123.5817        | 229.1295       | 115.0684        | <b>2</b> |
| 5 |                 |                 |                |                 | <b>R</b> | <b>175.1190</b> | 88.0631         | 158.0924       | 79.5498         | <b>1</b> |

Found in **Q8IZN3**, Probable palmitoyltransferase ZDHHC14 OS=Homo sapiens GN=ZDHHC14 PE=1 SV=1

Match to Query 865: 815.551428 from(408.782990, 2+) intensity(964894.4375)

Title: File1335 Spectrum3724 scans: 4349

Data file I:\2013-9-14-Hela-Prometh-Fr8-ZW.mgf

Click mouse within plot area to zoom in by factor of two about that point

Or,   to  Da Label all possible matches  Label matches used for scoring 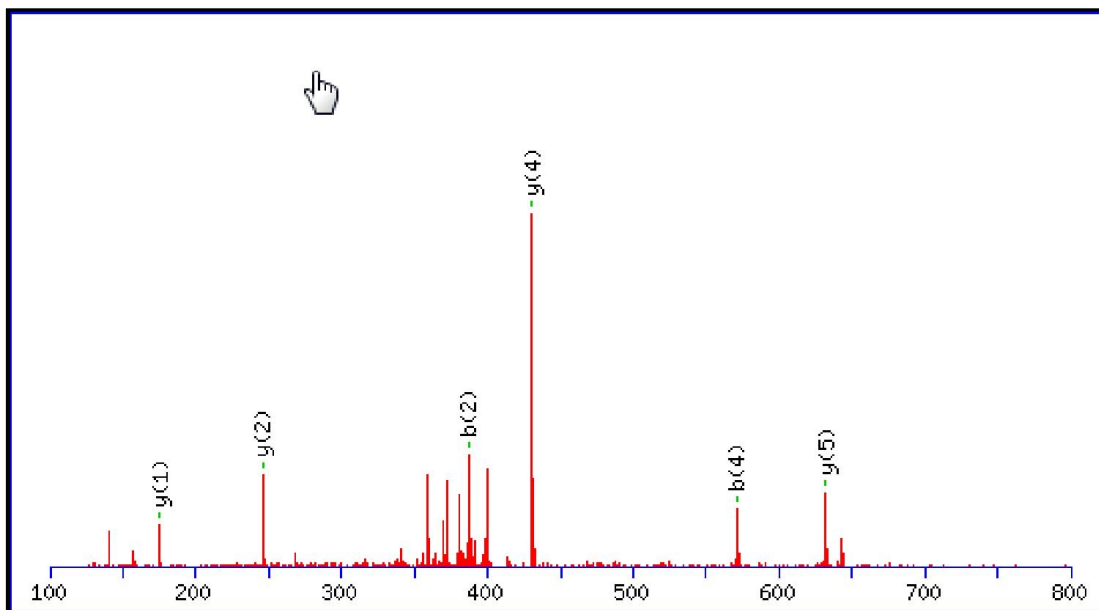**Monoisotopic mass of neutral peptide Mr(calc):** 815.5501**Fixed modifications:** Carbamidomethyl (C) (apply to specified residues or termini only)**Variable modifications:****K1** : Propionyl (K)**K2** : Propionyl-(13CD3)Methyl (K)**Ions Score:** 35 **Expect:** 0.036**Matches** : 6/40 fragment ions using 7 most intense peaks ([help](#))

| # | b               | b <sup>++</sup> | b*       | b <sup>+++</sup> | Seq. | y               | y <sup>++</sup> | y*       | y <sup>+++</sup> | # |
|---|-----------------|-----------------|----------|------------------|------|-----------------|-----------------|----------|------------------|---|
| 1 | 185.1285        | 93.0679         | 168.1019 | 84.5546          | K    |                 |                 |          |                  | 6 |
| 2 | <b>387.2875</b> | 194.1474        | 370.2609 | 185.6341         | K    | <b>632.4363</b> | 316.7218        | 615.4097 | 308.2085         | 5 |
| 3 | 500.3715        | 250.6894        | 483.3450 | 242.1761         | I    | <b>430.2772</b> | 215.6423        | 413.2507 | 207.1290         | 4 |
| 4 | <b>571.4086</b> | 286.2080        | 554.3821 | 277.6947         | A    | 317.1932        | 159.1002        | 300.1666 | 150.5870         | 3 |
| 5 | 642.4458        | 321.7265        | 625.4192 | 313.2132         | A    | <b>246.1561</b> | 123.5817        | 229.1295 | 115.0684         | 2 |
| 6 |                 |                 |          |                  | R    | <b>175.1190</b> | 88.0631         | 158.0924 | 79.5498          | 1 |

MS/MS Fragmentation of **KKKAR**Found in **E5RJU9**, Protein LYRIC OS=Homo sapiens GN=MTDH PE=2 SV=1

Match to Query 865: 815.551428 from(408.782990,2+) intensity(964894.4375)

Title: File1335 Spectrum3724 scans: 4349

Data file I:\2013-9-14-Hela-Prometh-Fr8-ZW.mgf

Click mouse within plot area to zoom in by factor of two about that point

Or,   to  Da Label all possible matches  Label matches used for scoring 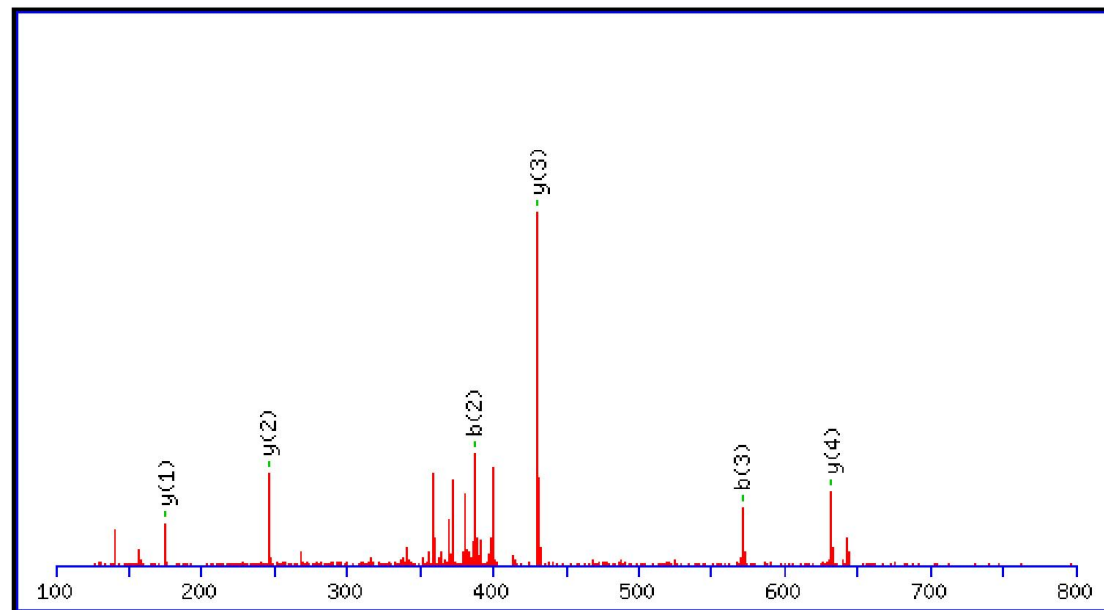**Monoisotopic mass of neutral peptide Mr(calc):** 815.5501**Fixed modifications:** Carbamidomethyl (C) (apply to specified residues or termini only)**Variable modifications:****K1** : Propionyl (K)**K2** : Propionyl-(13CD3)Methyl (K)**K3** : Propionyl (K)**Ions Score:** 35 **Expect:** 0.036**Matches** : 6/32 fragment ions using 7 most intense peaks ([help](#))

| # | b               | b <sup>++</sup> | b*       | b <sup>+++</sup> | Seq. | y               | y <sup>++</sup> | y*       | y <sup>+++</sup> | # |
|---|-----------------|-----------------|----------|------------------|------|-----------------|-----------------|----------|------------------|---|
| 1 | 185.1285        | 93.5679         | 168.1019 | 84.5546          | K    |                 |                 |          |                  | 5 |
| 2 | <b>387.2875</b> | 194.1474        | 370.2609 | 185.6341         | K    | <b>632.4363</b> | 316.7218        | 615.4097 | 308.2085         | 4 |
| 3 | <b>571.4086</b> | 286.2080        | 554.3821 | 277.6947         | K    | <b>430.2772</b> | 215.6423        | 413.2507 | 207.1290         | 3 |
| 4 | 642.4458        | 321.7265        | 625.4192 | 313.2132         | A    | <b>246.1561</b> | 123.5817        | 229.1295 | 115.0684         | 2 |
| 5 |                 |                 |          |                  | R    | <b>175.1190</b> | 88.0631         | 158.0924 | 79.5498          | 1 |

MS/MS Fragmentation of **KQKGAETELVR**

Found in **F5GWB7**, Putative ribosomal RNA methyltransferase NOP2 (Fragment) OS=Homo sapiens GN=NOP2 PE=2 SV=1

Match to Query 8071: 1383.771708 from(692.893130, 2+) intensity(148107.1250)

Title: File1335 Spectrum10460 scans: 11368

Data file I:\2013-9-14-Hela-Prometh-Fr8-ZW.mgf

Click mouse within plot area to zoom in by factor of two about that point

Or,   to  Da

Label all possible matches  Label matches used for scoring

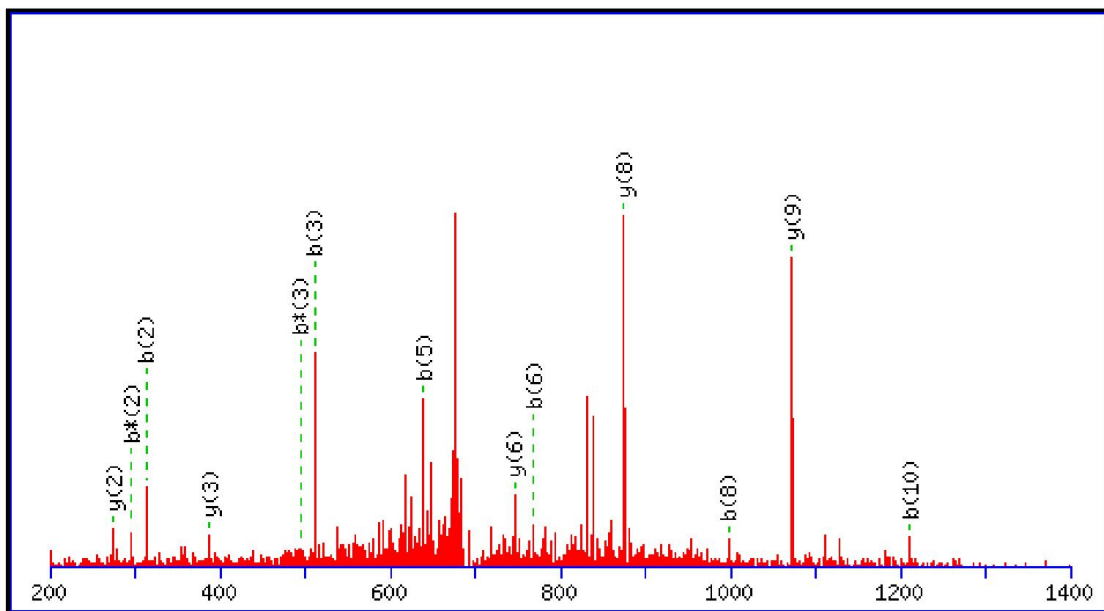

Monoisotopic mass of neutral peptide **Mr(calc): 1383.7722**

Fixed modifications: Carbamidomethyl (C) (apply to specified residues or termini only)

Variable modifications:

**K1** : Propionyl (K)

**K3** : Propionyl-Methylation (K)

Ions Score: 35 Expect: 0.28

Matches : 13/104 fragment ions using 24 most intense peaks

| #  | b                | b <sup>++</sup> | b*              | b <sup>+++</sup> | b <sup>0</sup> | b <sup>0++</sup> | Seq.     | y                | y <sup>++</sup> | y*        | y <sup>+++</sup> | y <sup>0</sup> | y <sup>0++</sup> | #         |
|----|------------------|-----------------|-----------------|------------------|----------------|------------------|----------|------------------|-----------------|-----------|------------------|----------------|------------------|-----------|
| 1  | 185.1285         | 93.0679         | 168.1019        | 84.5546          |                |                  | <b>K</b> |                  |                 |           |                  |                |                  | <b>11</b> |
| 2  | <b>313.1870</b>  | 157.0972        | <b>296.1605</b> | 148.5839         |                |                  | <b>Q</b> | 1200.6583        | 600.8328        | 1183.6317 | 592.3195         | 1182.6477      | 591.8275         | <b>10</b> |
| 3  | <b>511.3239</b>  | 256.1656        | <b>494.2973</b> | 247.6523         |                |                  | <b>K</b> | <b>1072.5997</b> | 536.8035        | 1055.5732 | 528.2902         | 1054.5891      | 527.7982         | <b>9</b>  |
| 4  | 568.3453         | 284.6763        | 551.3188        | 276.1630         |                |                  | <b>G</b> | <b>874.4629</b>  | 437.7351        | 857.4363  | 429.2218         | 856.4523       | 428.7298         | <b>8</b>  |
| 5  | <b>639.3824</b>  | 320.1946        | 622.3559        | 311.6816         |                |                  | <b>A</b> | 817.4414         | 409.2243        | 800.4149  | 400.7111         | 799.4308       | 400.2191         | <b>7</b>  |
| 6  | <b>768.4250</b>  | 384.7162        | 751.3985        | 376.2029         | 750.4145       | 375.7109         | <b>E</b> | <b>746.4043</b>  | 373.7058        | 729.3777  | 365.1925         | 728.3937       | 364.7005         | <b>6</b>  |
| 7  | 869.4727         | 435.2400        | 852.4462        | 426.7267         | 851.4621       | 426.2347         | <b>T</b> | 617.3617         | 309.1845        | 600.3352  | 300.6712         | 599.3511       | 300.1792         | <b>5</b>  |
| 8  | <b>998.5153</b>  | 499.7613        | 981.4888        | 491.2480         | 980.5047       | 490.7560         | <b>E</b> | 516.3140         | 258.6606        | 499.2875  | 250.1474         | 498.3035       | 249.6554         | <b>4</b>  |
| 9  | 1111.5994        | 556.3033        | 1094.5728       | 547.7900         | 1093.5888      | 547.2980         | <b>L</b> | <b>387.2714</b>  | 194.1394        | 370.2449  | 185.6261         |                |                  | <b>3</b>  |
| 10 | <b>1210.6678</b> | 605.8375        | 1193.6412       | 597.3243         | 1192.6572      | 596.8322         | <b>V</b> | <b>274.1874</b>  | 137.5973        | 257.1608  | 129.0840         |                |                  | <b>2</b>  |
| 11 |                  |                 |                 |                  |                |                  | <b>R</b> | 175.1190         | 88.0631         | 158.0924  | 79.5498          |                |                  | <b>1</b>  |

MS/MS Fragmentation of **KTTTASPR**

Found in **HOY4F5**, Microtubule-actin cross-linking factor 1, isoforms 1/2/3/5 (Fragment) OS=Homo sapiens GN=MACF1 PE=4 SV=1

Match to Query 1905: 930.513228 from(466.263890, 2+) intensity(407209.8438)

Title: File1335 Spectrum2573 scans: 3147

Data file I:\2013-9-14-Hela-Prometh-Fr8-ZW.mgf

Click mouse within plot area to zoom in by factor of two about that point

Or,   to  Da

Label all possible matches  Label matches used for scoring

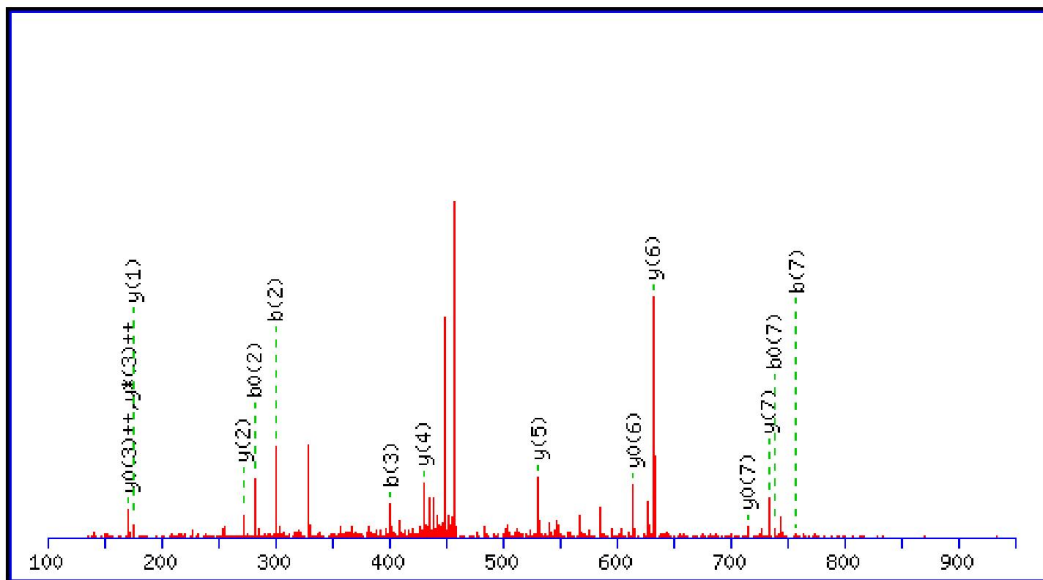

**Monoisotopic mass of neutral peptide Mr(calc):** 930.5134

**Fixed modifications:** Carbamidomethyl (C) (apply to specified residues or termini only)

**Variable modifications:**

**K1** : Propionyl-Methylation (K)

**Ions Score:** 40 **Expect:** 0.059

**Matches** : 15/78 fragment ions using 29 most inte

| # | b               | b <sup>++</sup> | b*       | b <sup>++</sup> | b <sup>0</sup>  | b <sup>0++</sup> | Seq. | y               | y <sup>++</sup> | y*       | y <sup>++</sup> | y <sup>0</sup>  | y <sup>0++</sup> | # |
|---|-----------------|-----------------|----------|-----------------|-----------------|------------------|------|-----------------|-----------------|----------|-----------------|-----------------|------------------|---|
| 1 | 199.1441        | 100.0757        | 182.1176 | 91.5624         |                 |                  | K    |                 |                 |          |                 |                 |                  | 8 |
| 2 | <b>300.1918</b> | 150.5995        | 283.1652 | 142.0863        | <b>282.1812</b> | 141.5942         | T    | <b>733.3839</b> | 367.1956        | 716.3573 | 358.6823        | <b>715.3733</b> | 358.1903         | 7 |
| 3 | <b>401.2395</b> | 201.1234        | 384.2129 | 192.6101        | 383.2289        | 192.1181         | T    | <b>632.3362</b> | 316.6717        | 615.3097 | 308.1585        | <b>614.3257</b> | 307.6665         | 6 |
| 4 | 502.2871        | 251.6472        | 485.2606 | 243.1339        | 484.2766        | 242.6419         | T    | <b>531.2885</b> | 266.1479        | 514.2620 | 257.6346        | 513.2780        | 257.1426         | 5 |
| 5 | 573.3243        | 287.1658        | 556.2977 | 278.6525        | 555.3137        | 278.1605         | A    | <b>430.2409</b> | 215.6241        | 413.2143 | 207.1108        | 412.2303        | 206.6188         | 4 |
| 6 | 660.3563        | 330.6818        | 643.3297 | 322.1685        | 642.3457        | 321.6765         | S    | 359.2037        | 180.1055        | 342.1772 | <b>171.5922</b> | 341.1932        | <b>171.1002</b>  | 3 |
| 7 | <b>757.4090</b> | 379.2082        | 740.3825 | 370.6949        | <b>739.3985</b> | 370.2029         | P    | <b>272.1717</b> | 136.5895        | 255.1452 | 128.0762        |                 |                  | 2 |
| 8 |                 |                 |          |                 |                 |                  | R    | <b>175.1190</b> | 88.0631         | 158.0924 | 79.5498         |                 |                  | 1 |

MS/MS Fragmentation of **KSDKR**Found in **E9PHK9**, Treacle protein OS=Homo sapiens GN=TCOF1 PE=2 SV=1

Match to Query 292: 758.428568 from(380.221560, 2+) intensity(95754.7266)

Title: File1335 Spectrum2909 scans: 3499

Data file I:\2013-9-14-Hela-Prometh-Fr8-ZW.mgf

Click mouse within plot area to zoom in by factor of two about that point

Or,   to  Da Label all possible matches  Label matches used for scoring 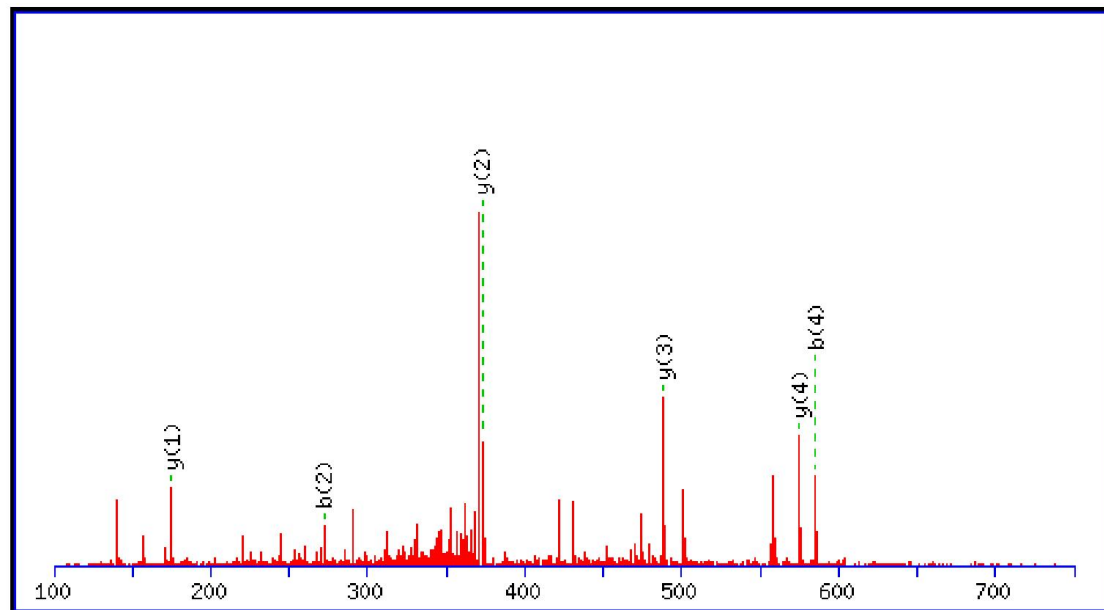**Monoisotopic mass of neutral peptide Mr(calc):** 758.4286**Fixed modifications:** Carbamidomethyl (C) (apply to specified residues or termini only)**Variable modifications:****K1** : Propionyl (K)**K4** : Propionyl-Methylation (K)**Ions Score:** 23 **Expect:** 3.1**Matches** : 6/42 fragment ions using

| # | b               | b <sup>++</sup> | b*       | b* <sup>++</sup> | b <sup>0</sup> | b <sup>0++</sup> | Seq. | y               | y <sup>++</sup> | y*       | y* <sup>++</sup> | y <sup>0</sup> | y <sup>0++</sup> | # |
|---|-----------------|-----------------|----------|------------------|----------------|------------------|------|-----------------|-----------------|----------|------------------|----------------|------------------|---|
| 1 | 185.1285        | 93.0679         | 168.1019 | 84.5546          |                |                  | K    |                 |                 |          |                  |                |                  | 5 |
| 2 | <b>272.1605</b> | 136.5839        | 255.1339 | 128.0406         | 254.1499       | 127.5786         | S    | <b>575.3148</b> | 288.1610        | 558.2882 | 279.6477         | 557.3042       | 279.1557         | 4 |
| 3 | 387.1874        | 194.0974        | 370.1609 | 185.5841         | 369.1769       | 185.0921         | D    | <b>488.2827</b> | 244.6450        | 471.2562 | 236.1317         | 470.2722       | 235.6397         | 3 |
| 4 | <b>585.3243</b> | 293.1658        | 568.2977 | 284.6525         | 567.3137       | 284.1605         | K    | <b>373.2558</b> | 187.1315        | 356.2292 | 178.6183         |                |                  | 2 |
| 5 |                 |                 |          |                  |                |                  | R    | <b>175.1190</b> | 88.0631         | 158.0924 | 79.5498          |                |                  | 1 |



MS/MS Fragmentation of **KAGPAKEQEPMPYVDSHEPR**

Found in **H3BU16**, Hematological and neurological-expressed 1-like protein (Fragment) OS=Homo sapiens GN=HM1L PE=2 SV=1

Match to Query 17788: 2337.181782 from(780.067870, 3+) intensity(170386.1250)

Title: File1335 Spectrum9443 scans: 10309

Data file I:\2013-9-14-Hela-Prometh-Fr8-ZW.mgf

Click mouse within plot area to zoom in by factor of two about that point

Or,   to  Da

Label all possible matches  Label matches used for scoring

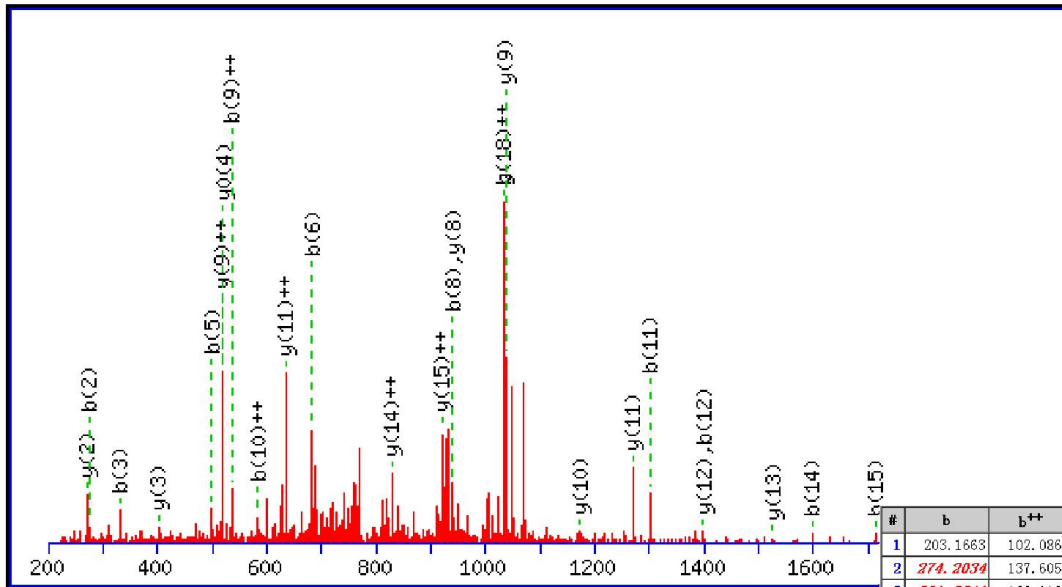

**Monoisotopic mass of neutral peptide Mr(calc): 2337.1816**

**Fixed modifications:** Carbamidomethyl (C) (apply to specified)

**Variable modifications:**

**K1** : Propionyl-(13CD3)Methyl (K)

**K6** : Propionyl (K)

**M11** : Label:13C(1)2H(3) (M)

**Ions Score:** 52 **Expect:** 0.0088

**Matches** : 26/212 fragment ions using 49 most intense peaks

| #  | b                | b <sup>++</sup>  | b <sup>+</sup> | b <sup>+</sup> ++ | b <sup>0</sup> | b <sup>0</sup> ++ | Seq. | y                | y <sup>++</sup>  | y <sup>+</sup> | y <sup>+</sup> ++ | y <sup>0</sup>  | y <sup>0</sup> ++ | #  |
|----|------------------|------------------|----------------|-------------------|----------------|-------------------|------|------------------|------------------|----------------|-------------------|-----------------|-------------------|----|
| 1  | 203.1663         | 102.0868         | 186.1397       | 93.5735           |                |                   | K    |                  |                  |                |                   |                 |                   | 20 |
| 2  | <b>274.2034</b>  | 137.6053         | 257.1769       | 129.0921          |                |                   | A    | 2136.0299        | 1068.5188        | 2119.0033      | 1060.0053         | 2118.0193       | 1059.5133         | 19 |
| 3  | <b>331.2249</b>  | 166.1161         | 314.1983       | 157.6028          |                |                   | G    | 2064.9928        | <b>1033.0000</b> | 2047.9662      | 1024.4867         | 2046.9822       | 1023.9947         | 18 |
| 4  | 428.2776         | 214.6425         | 411.2511       | 206.1292          |                |                   | P    | 2007.9713        | 1004.4893        | 1990.9448      | 995.9760          | 1989.9607       | 995.4840          | 17 |
| 5  | <b>499.3147</b>  | 250.1610         | 482.2882       | 241.6477          |                |                   | A    | 1910.9185        | 955.9629         | 1893.8920      | 947.4496          | 1892.9080       | 946.9576          | 16 |
| 6  | <b>683.4359</b>  | 342.2216         | 666.4094       | 333.7083          |                |                   | K    | 1839.8814        | <b>920.4444</b>  | 1822.8549      | 911.9311          | 1821.8709       | 911.4391          | 15 |
| 7  | 812.4785         | 406.7429         | 795.4520       | 398.2296          | 794.4680       | 397.7376          | E    | 1655.7602        | <b>828.3838</b>  | 1638.7337      | 819.8705          | 1637.7497       | 819.3785          | 14 |
| 8  | <b>940.5371</b>  | 470.7722         | 923.5105       | 462.2589          | 922.5265       | 461.7669          | Q    | <b>1526.7177</b> | 763.8625         | 1509.6911      | 755.3492          | 1508.7071       | 754.8572          | 13 |
| 9  | 1069.5797        | <b>535.2935</b>  | 1052.5531      | 526.7802          | 1051.5691      | 526.2882          | E    | <b>1398.6591</b> | 699.8332         | 1381.6325      | 691.3199          | 1380.6485       | 690.8279          | 12 |
| 10 | 1166.6325        | <b>583.8199</b>  | 1149.6059      | 575.3066          | 1148.6219      | 574.8146          | P    | <b>1269.6165</b> | 635.3119         | 1252.5899      | 626.7986          | 1251.6059       | 626.3066          | 11 |
| 11 | <b>1301.6951</b> | 651.3512         | 1284.6886      | 642.8379          | 1283.6846      | 642.3459          | N    | <b>1172.5637</b> | 596.7855         | 1155.5372      | 578.2722          | 1154.5532       | 577.7802          | 10 |
| 12 | <b>1398.7479</b> | 699.8776         | 1381.7213      | 691.3643          | 1380.7373      | 690.8723          | P    | <b>1037.5010</b> | 519.2542         | 1020.4745      | 510.7409          | 1019.4905       | 510.2489          | 9  |
| 13 | 1499.7956        | 750.4014         | 1482.7690      | 741.8881          | 1481.7850      | 741.3961          | T    | <b>940.4483</b>  | 470.7278         | 923.4217       | 462.2145          | 922.4377        | 461.7225          | 8  |
| 14 | <b>1598.8640</b> | 799.9356         | 1581.8374      | 791.4224          | 1580.8534      | 790.9303          | V    | 839.4006         | 420.2039         | 822.3741       | 411.6907          | 821.3900        | 411.1987          | 7  |
| 15 | <b>1713.8909</b> | 857.4491         | 1696.8644      | 848.9358          | 1695.8804      | 848.4438          | D    | 740.3322         | 370.6697         | 723.3056       | 362.1565          | 722.3216        | 361.6645          | 6  |
| 16 | 1800.9229        | 900.9651         | 1783.8964      | 892.4518          | 1782.9124      | 891.9598          | S    | 625.3052         | 313.1563         | 608.2787       | 304.6430          | 607.2947        | 304.1510          | 5  |
| 17 | 1937.9819        | 969.4946         | 1920.9553      | 960.9813          | 1919.9713      | 960.4893          | H    | 538.2732         | 269.6402         | 521.2467       | 261.1270          | <b>520.2627</b> | 260.6350          | 4  |
| 18 | 2067.0245        | <b>1034.0159</b> | 2049.9979      | 1025.5026         | 2049.0139      | 1025.0106         | E    | <b>401.2143</b>  | 201.1108         | 384.1878       | 192.5975          | 383.2037        | 192.1055          | 3  |
| 19 | 2164.0772        | 1082.5422        | 2147.0507      | 1074.0290         | 2146.0667      | 1073.5370         | P    | <b>272.1717</b>  | 136.5895         | 255.1452       | 128.0762          |                 |                   | 2  |
| 20 |                  |                  |                |                   |                |                   | R    | 175.1190         | 88.0631          | 158.0924       | 79.5498           |                 |                   | 1  |

Match to Query 1831: 920.544288 from(461.279420, 2+) intensity(11015136.0000)

Title: File1335 Spectrum4977 scans: 5657

Data file I:\2013-9-14-Hela-Prometh-Fr8-ZW.mgf

Click mouse within plot area to zoom in by factor of two about that point

Or,   to  DaLabel all possible matches  Label matches used for scoring 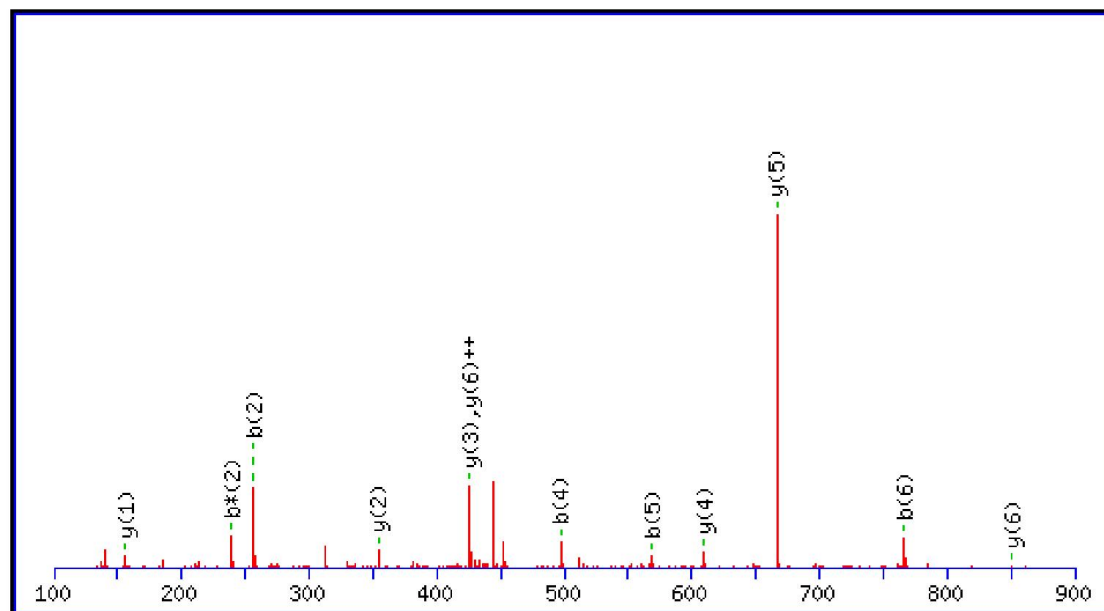**Monoisotopic mass of neutral peptide Mr(calc):** 920.5443**Fixed modifications:** Carbamidomethyl (C) (apply to specified residues or termini only)**Variable modifications:****K2** : Propionyl (K)**K4** : Propionyl (K)**K6** : Propionyl-Methylation (K)**Ions Score:** 52 **Expect:** 0.0031**Matches** : 12/44 fragment ions using 16 most intense peaks

| # | b               | b <sup>++</sup> | b <sup>*</sup>  | b <sup>++</sup> | Seq. | y               | y <sup>++</sup> | y <sup>*</sup> | y <sup>++</sup> | # |
|---|-----------------|-----------------|-----------------|-----------------|------|-----------------|-----------------|----------------|-----------------|---|
| 1 | 72.0444         | 36.5258         |                 |                 | A    |                 |                 |                |                 | 7 |
| 2 | <b>256.1656</b> | 128.5864        | <b>239.1390</b> | 120.0731        | K    | <b>850.5145</b> | <b>425.7609</b> | 833.4880       | 417.2476        | 6 |
| 3 | 313.1870        | 157.0972        | 296.1605        | 148.5839        | G    | <b>666.3933</b> | 333.7003        | 649.3668       | 325.1870        | 5 |
| 4 | <b>497.3082</b> | 249.1577        | 480.2817        | 240.6445        | K    | <b>609.3719</b> | 305.1896        | 592.3453       | 296.6763        | 4 |
| 5 | <b>568.3453</b> | 284.6763        | 551.3188        | 276.1630        | A    | <b>425.2507</b> | 213.1290        | 408.2241       | 204.6157        | 3 |
| 6 | <b>766.4822</b> | 383.7447        | 749.4556        | 375.2314        | K    | <b>354.2136</b> | 177.6104        | 337.1870       | 169.0972        | 2 |
| 7 |                 |                 |                 |                 | H    | <b>156.0768</b> | 78.5420         |                |                 | 1 |

MS/MS Fragmentation of **QAASKAASKQR**Found in **Q9H1E3**, Nuclear ubiquitous casein and cyclin-dependent kinase substrate 1 OS=Homo sapiens GN=NUCKS1 PE=1 SV=1

Match to Query 6574: 1270.698588 from(636.356570,2+) intensity(3423992.7500)

Title: File1335 Spectrum4404 scans: 5060

Data file I:\2013-9-14-Hela-Prometh-Fr8-ZW.mgf

Click mouse within plot area to zoom in by factor of two about that point

Or,   to  Da Label all possible matches  Label matches used for scoring 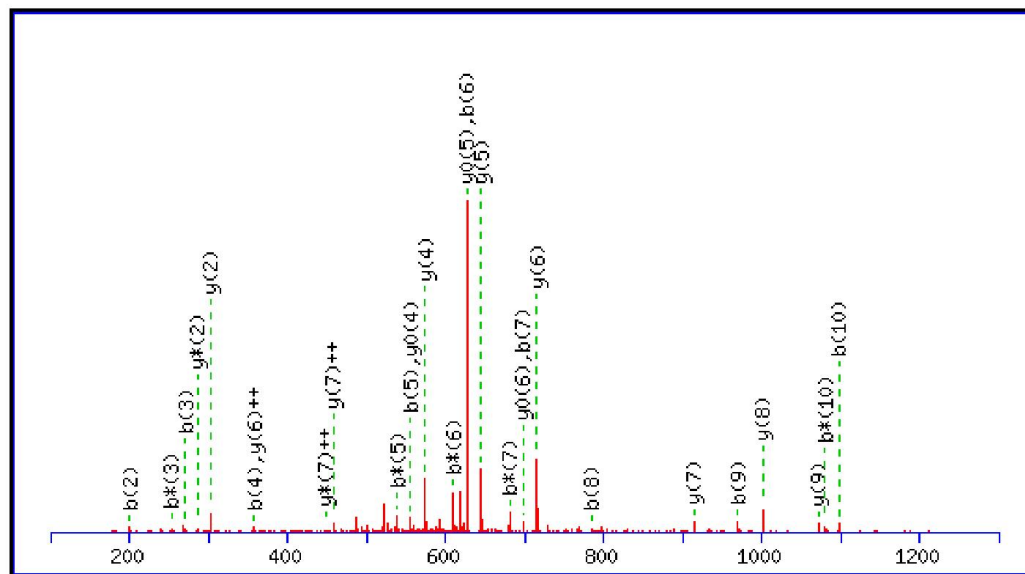Monoisotopic mass of neutral peptide  $M_r(\text{calc})$ : 1270.6993

Fixed modifications: Carbamidomethyl (C) (apply to specified residues or termini only)

Variable modifications:

**K5** : Propionyl-Methylation (K)**K9** : Propionyl (K)

Ions Score: 60 Expect: 0.00069

Matches : 28/108 fragment ions using 43 most intense peaks

| #  | b                | b <sup>++</sup> | b*               | b <sup>+++</sup> | b <sup>0</sup> | b <sup>0++</sup> | Seq. | y                | y <sup>++</sup> | y*              | y <sup>+++</sup> | y <sup>0</sup>  | y <sup>0++</sup> | #  |
|----|------------------|-----------------|------------------|------------------|----------------|------------------|------|------------------|-----------------|-----------------|------------------|-----------------|------------------|----|
| 1  | 129.0659         | 65.3666         | 112.0393         | 56.5233          |                |                  | Q    |                  |                 |                 |                  |                 |                  | 11 |
| 2  | <b>200.1030</b>  | 100.5551        | 183.0764         | 92.0418          |                |                  | A    | 1143.6480        | 572.3277        | 1126.6215       | 563.8144         | 1125.6375       | 563.3224         | 10 |
| 3  | <b>271.1401</b>  | 136.0737        | <b>254.1135</b>  | 127.5604         |                |                  | A    | <b>1072.6109</b> | 536.8091        | 1055.5844       | 528.2958         | 1054.6004       | 527.8038         | 9  |
| 4  | <b>358.1721</b>  | 179.5897        | 341.1456         | 171.0764         | 340.1615       | 170.5844         | S    | <b>1001.5738</b> | 501.2905        | 984.5473        | 492.7773         | 983.5633        | 492.2853         | 8  |
| 5  | <b>556.3089</b>  | 278.6581        | <b>539.2824</b>  | 270.1448         | 538.2984       | 269.6528         | K    | <b>914.5418</b>  | <b>457.7745</b> | 897.5152        | <b>449.2613</b>  | 896.5312        | 448.7693         | 7  |
| 6  | <b>627.3461</b>  | 314.1767        | <b>610.3195</b>  | 305.6634         | 609.3355       | 305.1714         | A    | <b>716.4050</b>  | <b>358.7061</b> | 699.3784        | 350.1928         | <b>698.3944</b> | 349.7008         | 6  |
| 7  | <b>698.3832</b>  | 349.6952        | <b>681.3566</b>  | 341.1819         | 680.3726       | 340.6899         | A    | <b>645.3678</b>  | 323.1876        | 628.3413        | 314.6743         | <b>627.3573</b> | 314.1823         | 5  |
| 8  | <b>785.4152</b>  | 393.2112        | 768.3886         | 384.6980         | 767.4046       | 384.2060         | S    | <b>574.3307</b>  | 287.6690        | 557.3042        | 279.1557         | <b>556.3202</b> | 278.6637         | 4  |
| 9  | <b>969.5364</b>  | 485.2718        | 952.5098         | 476.7585         | 951.5258       | 476.2665         | K    | 487.2987         | 244.1530        | 470.2722        | 235.6397         |                 |                  | 3  |
| 10 | <b>1097.5949</b> | 549.3011        | <b>1080.5684</b> | 540.7878         | 1079.5844      | 540.2958         | Q    | <b>303.1775</b>  | 152.0924        | <b>286.1510</b> | 143.5791         |                 |                  | 2  |
| 11 |                  |                 |                  |                  |                |                  | R    | 175.1190         | 88.0631         | 158.0924        | 79.5498          |                 |                  | 1  |

Match to Query 10403: 1767.936628 from(884.975590, 2+) intensity(180978.7031)

Title: File1311 Spectrum7689 scans: 8288

Data file I:\2013-9-13-Hela-Prometh-Fr7-ZW.mgf

Click mouse within plot area to zoom in by factor of two about that point

Or,   to  Da Label all possible matches  Label matches used for scoring 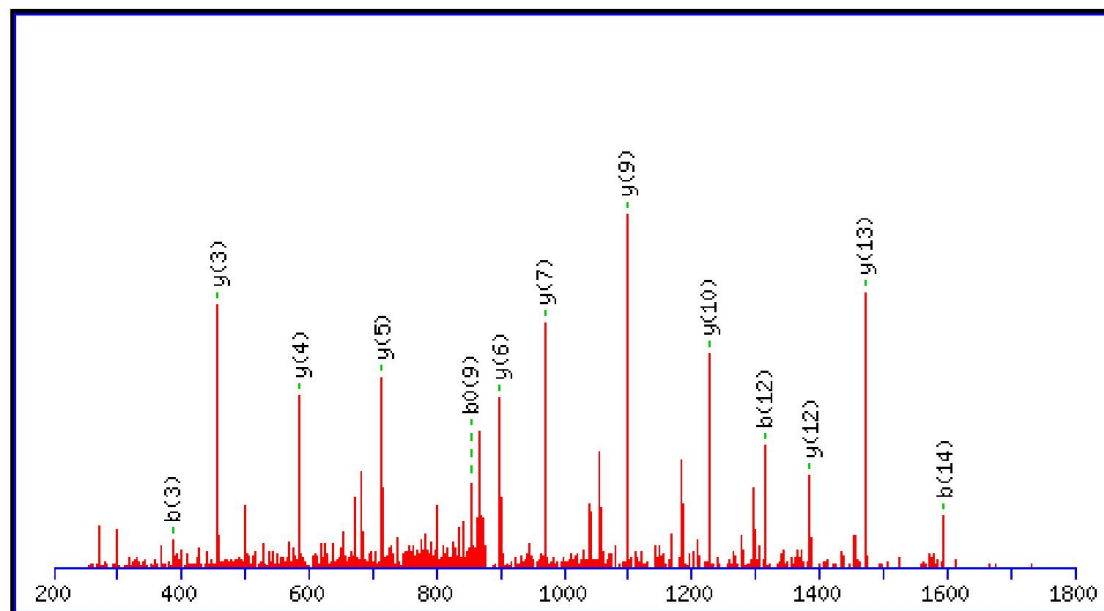**Monoisotopic mass of neutral peptide Mr(calc): 1767.93****Fixed modifications:** Carbamidomethyl (C) (apply to specific)**Variable modifications:****K1** : Propionyl-Methylation (K)**K10** : Propionyl (K)**K14** : Propionyl (K)**Ions Score:** 81 **Expect:** 8.2e-006**Matches** : 13/158 fragment ions using 15 most intense peaks

| #  | b                | b <sup>++</sup> | b*        | b* <sup>++</sup> | b <sup>0</sup>  | b <sup>0++</sup> | Seq.     | y                | y <sup>++</sup> | y*        | y* <sup>++</sup> | y <sup>0</sup> | y <sup>0++</sup> | #  |
|----|------------------|-----------------|-----------|------------------|-----------------|------------------|----------|------------------|-----------------|-----------|------------------|----------------|------------------|----|
| 1  | 199.1441         | 100.0757        | 182.1176  | 91.5624          |                 |                  | <b>K</b> |                  |                 |           |                  |                |                  | 15 |
| 2  | 298.2125         | 149.6099        | 281.1860  | 141.0966         |                 |                  | <b>V</b> | 1570.8071        | 785.9072        | 1553.7806 | 777.3939         | 1552.7966      | 776.9019         | 14 |
| 3  | <b>385.2445</b>  | 193.1259        | 368.2180  | 184.6126         | 367.2340        | 184.1206         | <b>S</b> | <b>1471.7387</b> | 736.3730        | 1454.7122 | 727.8597         | 1453.7281      | 727.3677         | 13 |
| 4  | 472.2766         | 236.6419        | 455.2500  | 228.1287         | 454.2660        | 227.6366         | <b>S</b> | <b>1384.7067</b> | 692.8570        | 1367.6801 | 684.3437         | 1366.6961      | 683.8517         | 12 |
| 5  | 543.3137         | 272.1605        | 526.2871  | 263.6472         | 525.3031        | 263.1552         | <b>A</b> | 1297.6747        | 649.3410        | 1280.6481 | 640.8277         | 1279.6641      | 640.3357         | 11 |
| 6  | 672.3563         | 336.6818        | 655.3297  | 328.1685         | 654.3457        | 327.6765         | <b>E</b> | <b>1226.6375</b> | 613.8224        | 1209.6110 | 605.3091         | 1208.6270      | 604.8171         | 10 |
| 7  | 729.3777         | 365.1925        | 712.3512  | 356.6792         | 711.3672        | 356.1872         | <b>G</b> | <b>1097.5950</b> | 549.3011        | 1080.5684 | 540.7878         | 1079.5844      | 540.2958         | 9  |
| 8  | 800.4149         | 400.7111        | 783.3883  | 392.1978         | 782.4043        | 391.7058         | <b>A</b> | 1040.5735        | 520.7904        | 1023.5469 | 512.2771         | 1022.5629      | 511.7851         | 8  |
| 9  | 871.4520         | 436.2296        | 854.4254  | 427.7163         | <b>853.4414</b> | 427.2243         | <b>A</b> | <b>969.5364</b>  | 485.2718        | 952.5098  | 476.7585         | 951.5258       | 476.2665         | 7  |
| 10 | 1055.5732        | 528.2902        | 1038.5466 | 519.7769         | 1037.5626       | 519.2849         | <b>K</b> | <b>898.4993</b>  | 449.7533        | 881.4727  | 441.2400         | 880.4887       | 440.7480         | 6  |
| 11 | 1184.6157        | 592.8115        | 1167.5892 | 584.2982         | 1166.6052       | 583.8062         | <b>E</b> | <b>714.3781</b>  | 357.6927        | 697.3515  | 349.1794         | 696.3675       | 348.6874         | 5  |
| 12 | <b>1313.6583</b> | 657.3328        | 1296.6318 | 648.8195         | 1295.6478       | 648.3275         | <b>E</b> | <b>585.3355</b>  | 293.1714        | 568.3089  | 284.6581         | 567.3249       | 284.1661         | 4  |
| 13 | 1410.7111        | 705.8592        | 1393.6846 | 697.3459         | 1392.7005       | 696.8539         | <b>P</b> | <b>456.2929</b>  | 228.6501        | 439.2663  | 220.1368         |                |                  | 3  |
| 14 | <b>1594.8323</b> | 797.9198        | 1577.8057 | 789.4065         | 1576.8217       | 788.9145         | <b>K</b> | 359.2401         | 180.1237        | 342.2136  | 171.6104         |                |                  | 2  |
| 15 |                  |                 |           |                  |                 |                  | <b>R</b> | 175.1190         | 88.0631         | 158.0924  | 79.5498          |                |                  | 1  |

MS/MS Fragmentation of **KPAQGKR**Found in **H7BY00**, Twist-related protein 1 (Fragment) OS=Homo sapiens GN=TWIST1 PE=4 SV=1

Match to Query 1527: 895.524688 from(448.769620, 2+) intensity(5036782.0000)

Title: File1311 Spectrum3415 scans: 3835

Data file I:\2013-9-13-Hela-Prometh-Fr7-ZW.mgf

Click mouse within plot area to zoom in by factor of two about that point

Or,   to  Da Label all possible matches  Label matches used for scoring 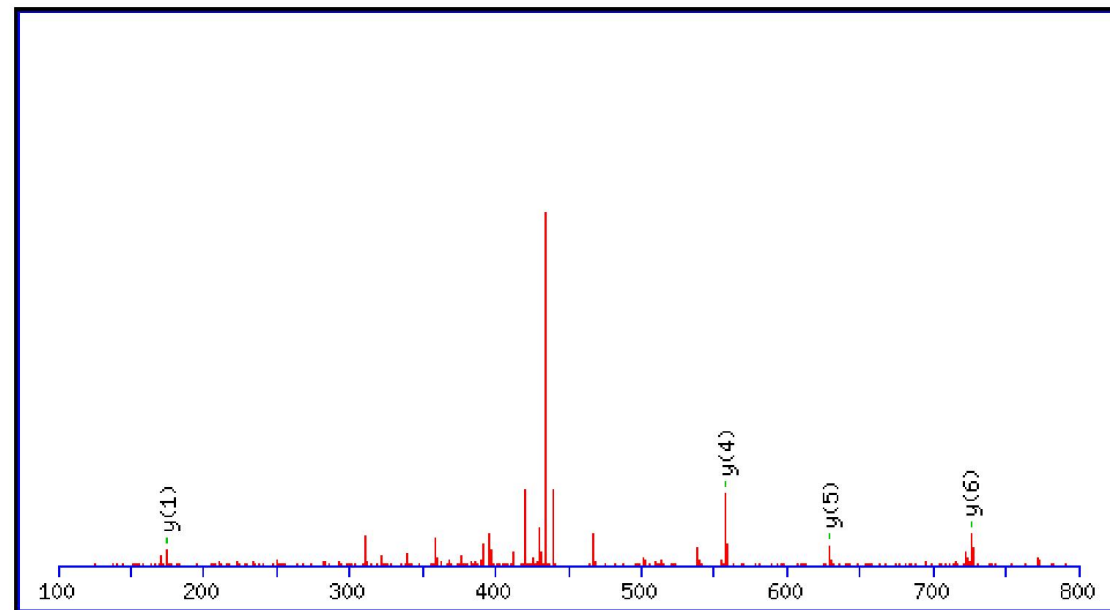Monoisotopic mass of neutral peptide **Mr(calc):** 895.5239

Fixed modifications: Carbamidomethyl (C) (apply to s

Variable modifications:

**N-term** : Acetyl (Protein N-term)**K6** : Propionyl-Methylation (K)**Ions Score:** 21 **Expect:** 2.2**Matches** : 4/48 fragment ions using 7 most intense peak

| # | b        | b <sup>++</sup> | b*       | b <sup>*++</sup> | Seq.     | y               | y <sup>++</sup> | y*       | y <sup>*++</sup> | #        |
|---|----------|-----------------|----------|------------------|----------|-----------------|-----------------|----------|------------------|----------|
| 1 | 171.1128 | 86.0600         | 154.0863 | 77.5468          | <b>K</b> |                 |                 |          |                  | <b>7</b> |
| 2 | 268.1656 | 134.5864        | 251.1390 | 126.0731         | <b>P</b> | <b>726.4257</b> | 363.7165        | 709.3992 | 355.2032         | <b>6</b> |
| 3 | 339.2027 | 170.1050        | 322.1761 | 161.5917         | <b>A</b> | <b>629.3729</b> | 315.1901        | 612.3464 | 306.6768         | <b>5</b> |
| 4 | 467.2613 | 234.1348        | 450.2347 | 225.6210         | <b>Q</b> | <b>558.3358</b> | 279.6715        | 541.3093 | 271.1583         | <b>4</b> |
| 5 | 524.2827 | 262.6450        | 507.2562 | 254.1317         | <b>G</b> | 430.2772        | 215.6423        | 413.2507 | 207.1290         | <b>3</b> |
| 6 | 722.4196 | 361.7134        | 705.3930 | 353.2001         | <b>K</b> | 373.2558        | 187.1315        | 356.2292 | 178.6183         | <b>2</b> |
| 7 |          |                 |          |                  | <b>R</b> | <b>175.1190</b> | 88.0631         | 158.0924 | 79.5498          | <b>1</b> |

Match to Query 4756: 1149.599208 from(575.806880, 2+) intensity(250741.9531)

Title: File1311 Spectrum3095 scans: 3501

Data file I:\2013-9-13-Hela-Prometh-Fr7-ZW.mgf

Click mouse within plot area to zoom in by factor of two about that point

Or,   to  Da Label all possible matches  Label matches used for scoring 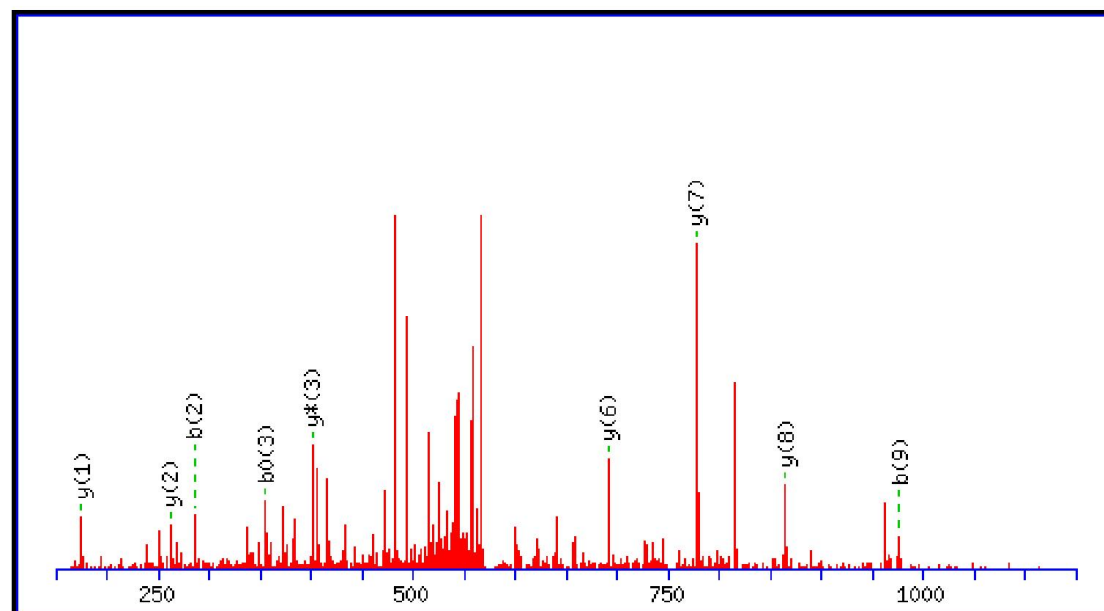**Monoisotopic mass of neutral peptide Mr(calc):** 1149.6102**Fixed modifications:** Carbamidomethyl (C) (apply to specified residues or termini only)**Variable modifications:****K2** : Propionyl-Methylation (K)**Ions Score:** 23 **Expect:** 2.7**Matches** : 9/104 fragment ions using 20 most intense peaks

| #  | b               | b <sup>++</sup> | b <sup>+</sup> | b <sup>+++</sup> | b <sup>0</sup>  | b <sup>0++</sup> | Seq. | y               | y <sup>++</sup> | y <sup>+</sup>  | y <sup>+++</sup> | y <sup>0</sup> | y <sup>0++</sup> | #  |
|----|-----------------|-----------------|----------------|------------------|-----------------|------------------|------|-----------------|-----------------|-----------------|------------------|----------------|------------------|----|
| 1  | 88.0393         | 44.5233         |                |                  | 70.0287         | 35.5180          | S    |                 |                 |                 |                  |                |                  | 10 |
| 2  | <b>286.1761</b> | 143.5917        | 269.1496       | 135.0784         | 268.1656        | 134.5864         | K    | 1063.5854       | 532.2964        | 1046.5889       | 523.7831         | 1045.5749      | 523.2911         | 9  |
| 3  | 373.2082        | 187.1077        | 356.1816       | 178.5944         | <b>355.1976</b> | 178.1024         | S    | <b>865.4486</b> | 433.2279        | 848.4221        | 424.7147         | 847.4381       | 424.2227         | 8  |
| 4  | 460.2402        | 230.6237        | 443.2136       | 222.1105         | 442.2296        | 221.6184         | S    | <b>778.4166</b> | 389.7119        | 761.3900        | 381.1987         | 760.4060       | 380.7067         | 7  |
| 5  | 547.2722        | 274.1397        | 530.2457       | 265.6265         | 529.2617        | 265.1345         | S    | <b>691.3846</b> | 346.1959        | 674.3580        | 337.6826         | 673.3740       | 337.1906         | 6  |
| 6  | 646.3406        | 323.6740        | 629.3441       | 315.1607         | 628.3301        | 314.6687         | V    | 604.3525        | 302.6799        | 587.3260        | 294.1666         | 586.3420       | 293.6746         | 5  |
| 7  | 733.3727        | 367.1900        | 716.3461       | 358.6787         | 715.3621        | 358.1847         | S    | 505.2841        | 253.1457        | 488.2576        | 244.6324         | 487.2736       | 244.1404         | 4  |
| 8  | 889.4738        | 445.2405        | 872.4472       | 436.7272         | 871.4632        | 436.2352         | R    | 418.2521        | 209.6297        | <b>401.2255</b> | 201.1164         | 400.2415       | 200.6244         | 3  |
| 9  | <b>976.5058</b> | 488.7565        | 959.4792       | 480.2433         | 958.4952        | 479.7513         | S    | <b>262.1510</b> | 131.5791        | 245.1244        | 123.0659         | 244.1404       | 122.5738         | 2  |
| 10 |                 |                 |                |                  |                 |                  | R    | <b>175.1190</b> | 88.0631         | 158.0924        | 79.5498          |                |                  | 1  |

Found in **P50991**, T-complex protein 1 subunit delta OS=Homo sapiens GN=CCT4 PE=1 SV=4

Match to Query 2292: 963.476348 from(482.745450, 2+) intensity(105868.3750)

Title: File1311 Spectrum4256 scans: 4712

Data file I:\2013-9-13-Hela-Prometh-Fr7-ZW.mgf

Click mouse within plot area to zoom in by factor of two about that point

Or,   to  Da Label all possible matches  Label matches used for scoring 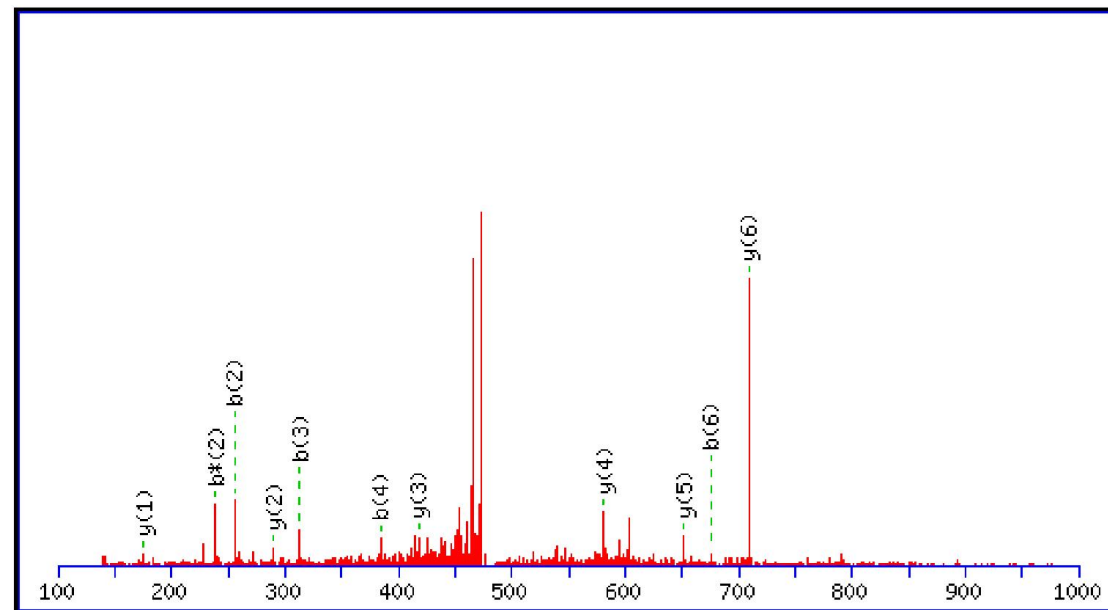**Monoisotopic mass of neutral peptide  $M_r(\text{calc})$ :** 963.4774**Fixed modifications:** Carbamidomethyl (C) (apply to specified residues or termini only)**Variable modifications:****K2** : Propionyl-Methylation (K)**Ions Score:** 29 **Expect:** 0.36**Matches** : 11/68 fragment ions using 36 most :

| # | b               | b <sup>++</sup> | b*              | b <sup>*++</sup> | b <sup>0</sup> | b <sup>0++</sup> | Seq. | y               | y <sup>++</sup> | y*       | y <sup>*++</sup> | y <sup>0</sup> | y <sup>0++</sup> | # |
|---|-----------------|-----------------|-----------------|------------------|----------------|------------------|------|-----------------|-----------------|----------|------------------|----------------|------------------|---|
| 1 | 58.0287         | 29.5180         |                 |                  |                |                  | G    |                 |                 |          |                  |                |                  | 8 |
| 2 | <b>256.1656</b> | 128.5864        | <b>239.1390</b> | 120.0731         |                |                  | K    | 907.4632        | 454.2352        | 890.4367 | 445.7220         | 889.4526       | 445.2300         | 7 |
| 3 | <b>313.1870</b> | 157.0972        | 296.1605        | 148.5839         |                |                  | G    | <b>709.3264</b> | 355.1668        | 692.2998 | 346.6536         | 691.3158       | 346.1615         | 6 |
| 4 | <b>384.2241</b> | 192.6157        | 367.1976        | 184.1024         |                |                  | A    | <b>652.3049</b> | 326.6561        | 635.2784 | 318.1428         | 634.2944       | 317.6508         | 5 |
| 5 | 547.2875        | 274.1474        | 530.2609        | 265.6341         |                |                  | Y    | <b>581.2678</b> | 291.1375        | 564.2413 | 282.6243         | 563.2572       | 282.1323         | 4 |
| 6 | <b>675.3461</b> | 338.1767        | 658.3195        | 329.6634         |                |                  | Q    | <b>418.2045</b> | 209.6059        | 401.1779 | 201.0926         | 400.1939       | 200.6006         | 3 |
| 7 | 790.3730        | 395.6901        | 773.3464        | 387.1769         | 772.3624       | 386.6849         | D    | <b>290.1459</b> | 145.5766        | 273.1193 | 137.0633         | 272.1353       | 136.5713         | 2 |
| 8 |                 |                 |                 |                  |                |                  | R    | <b>175.1190</b> | 88.0631         | 158.0924 | 79.5498          |                |                  | 1 |

MS/MS Fragmentation of **KSTLIPTQR**

Found in **075376**, Nuclear receptor corepressor 1 OS=Homo sapiens GN=NCOR1 PE=1 SV=2

Match to Query 4127: 1100.619488 from(551.317020, 2+) intensity(68938.2031)

Title: File1311 Spectrum4155 scans: 4607

Data file I:\2013-9-13-Hela-Prometh-Fr7-ZW.mgf

Click mouse within plot area to zoom in by factor of two about that point

Or,   to  Da

Label all possible matches  Label matches used for scoring

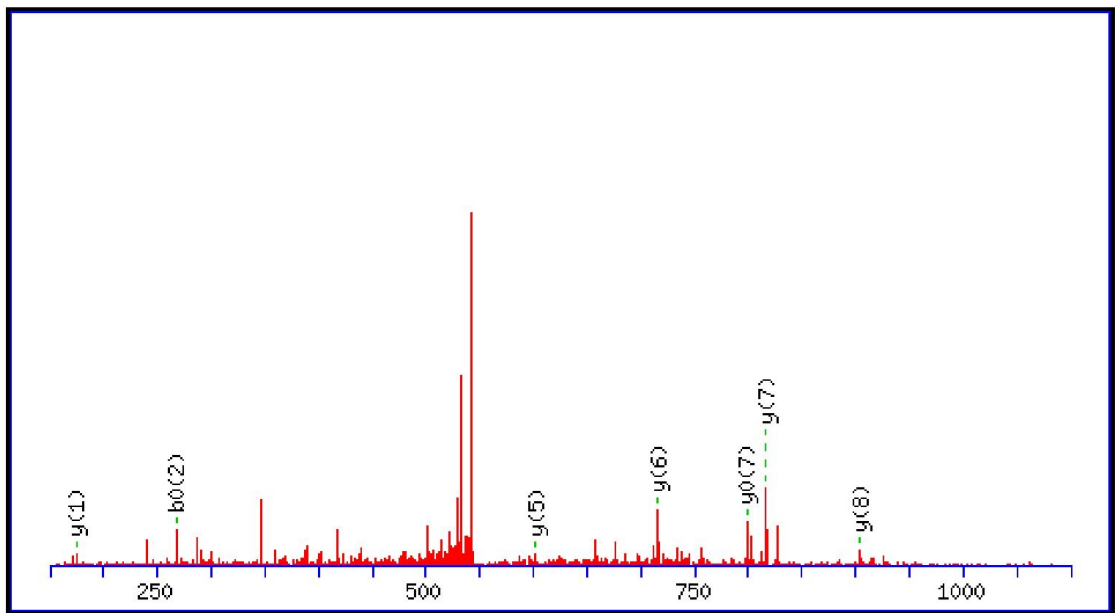

**Monoisotopic mass of neutral peptide Mr(calc):** 1100.6190

**Fixed modifications:** Carbamidomethyl (C) (apply to specified residues or termini only)

**Variable modifications:**

**K1** : Propionyl-Methylation (K)

**Ions Score:** 21 **Expect:** 5.4

**Matches** : 7/90 fragment ions using 20 most intense peaks

| # | b        | b <sup>++</sup> | b*       | b <sup>+++</sup> | b <sup>0</sup> | b <sup>0++</sup> | Seq. | y        | y <sup>++</sup> | y*       | y <sup>+++</sup> | y <sup>0</sup> | y <sup>0++</sup> | # |
|---|----------|-----------------|----------|------------------|----------------|------------------|------|----------|-----------------|----------|------------------|----------------|------------------|---|
| 1 | 99.1441  | 100.0757        | 182.1176 | 91.5624          |                |                  | K    |          |                 |          |                  |                |                  | 9 |
| 2 | 236.1761 | 143.5917        | 269.1496 | 135.0784         | 268.1656       | 134.5864         | S    | 903.4894 | 452.2483        | 886.4629 | 443.7351         | 885.4789       | 443.2431         | 8 |
| 3 | 387.2238 | 194.1155        | 370.1973 | 185.6023         | 369.2132       | 185.1103         | T    | 816.4574 | 408.7323        | 799.4308 | 400.2191         | 798.4468       | 399.7271         | 7 |
| 4 | 500.3079 | 250.6576        | 483.2813 | 242.1443         | 482.2973       | 241.6523         | L    | 715.4097 | 358.2085        | 698.3832 | 349.6952         | 697.3992       | 349.2032         | 6 |
| 5 | 601.3556 | 301.1814        | 584.3290 | 292.6681         | 583.3450       | 292.1761         | T    | 602.3257 | 301.6665        | 585.2991 | 293.1532         | 584.3151       | 292.6612         | 5 |
| 6 | 698.4083 | 349.7078        | 681.3818 | 341.1945         | 680.3978       | 340.7025         | P    | 501.2780 | 251.1426        | 484.2514 | 242.6293         | 483.2674       | 242.1373         | 4 |
| 7 | 799.4560 | 400.2316        | 782.4294 | 391.7184         | 781.4454       | 391.2264         | T    | 404.2252 | 202.6162        | 387.1987 | 194.1030         | 386.2146       | 193.6110         | 3 |
| 8 | 927.5146 | 464.2609        | 910.4880 | 455.7477         | 909.5040       | 455.2556         | Q    | 308.1775 | 152.0924        | 286.1510 | 143.5791         |                |                  | 2 |
| 9 |          |                 |          |                  |                |                  | R    | 175.1190 | 88.0631         | 158.0924 | 79.5498          |                |                  | 1 |



Found in **P46087**, Putative ribosomal RNA methyltransferase NOP2 OS=Homo sapiens GN=NOP2 PE=1 SV=2

Match to Query 1201: 862.515288 from(432.264920, 2+) intensity(318835.0938)

Title: File1311 Spectrum1450 scans: 1782

Data file I:\2013-9-13-Hela-Prometh-Fr7-ZW.mgf

Click mouse within plot area to zoom in by factor of two about that point

Or,   to  Da Label all possible matches  Label matches used for scoring 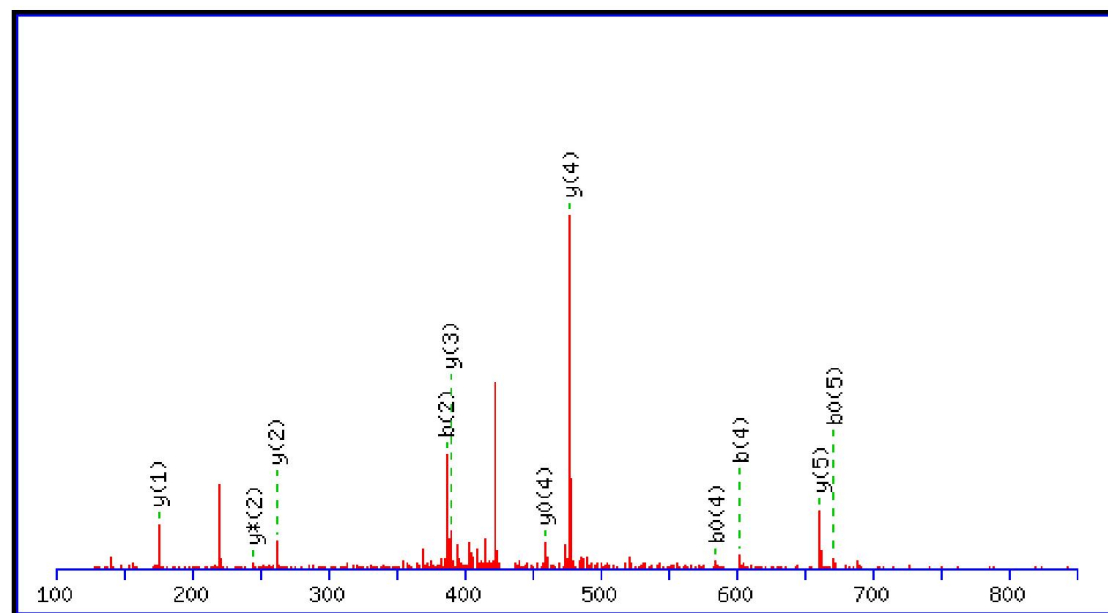**Monoisotopic mass of neutral peptide Mr(calc):** 862.5145**Fixed modifications:** Carbamidomethyl (C) (apply to specified residues or termini only)**Variable modifications:****K1** : Propionyl-(13CD3)Methyl (K)**K2** : Propionyl (K)**Ions Score:** 31 **Expect:** 0.3**Matches** : 11/54 fragment ions using 22 mo

| # | b               | b <sup>++</sup> | b*       | b <sup>+++</sup> | b <sup>0</sup>  | b <sup>0++</sup> | Seq. | y               | y <sup>++</sup> | y*              | y <sup>+++</sup> | y <sup>0</sup>  | y <sup>0++</sup> | # |
|---|-----------------|-----------------|----------|------------------|-----------------|------------------|------|-----------------|-----------------|-----------------|------------------|-----------------|------------------|---|
| 1 | 203.1663        | 102.0868        | 186.1397 | 93.5735          |                 |                  | K    |                 |                 |                 |                  |                 |                  | 6 |
| 2 | <b>387.2875</b> | 194.1474        | 370.2609 | 185.6341         |                 |                  | K    | <b>661.3628</b> | 331.1850        | 644.3362        | 322.6717         | 643.3522        | 322.1797         | 5 |
| 3 | 474.3195        | 237.6634        | 457.2929 | 229.1501         | 456.3089        | 228.6581         | S    | <b>477.2416</b> | 239.1244        | 460.2150        | 230.6112         | <b>459.2310</b> | 230.1191         | 4 |
| 4 | <b>602.3781</b> | 301.6927        | 585.3515 | 293.1794         | <b>584.3675</b> | 292.6874         | Q    | <b>390.2096</b> | 195.6084        | 373.1830        | 187.0951         | 372.1990        | 186.6031         | 3 |
| 5 | 689.4101        | 345.2087        | 672.3836 | 336.6954         | <b>671.3995</b> | 336.2034         | S    | <b>262.1510</b> | 131.5791        | <b>245.1244</b> | 123.0659         | 244.1404        | 122.5738         | 2 |
| 6 |                 |                 |          |                  |                 |                  | R    | <b>175.1190</b> | 88.0631         | 158.0924        | 79.5498          |                 |                  | 1 |

MS/MS Fragmentation of **KQKAR**Found in **P46087**, Putative ribosomal RNA methyltransferase NOP2 OS=Homo sapiens GN=NOP2 PE=1 SV=2

Match to Query 285: 759.487408 from(380.750980,2+) intensity(71655.5703)

Title: File1311 Spectrum2638 scans: 3025

Data file I:\2013-9-13-Hela-Prometh-Fr7-ZW.mgf

Click mouse within plot area to zoom in by factor of two about that point

Or,   to  Da Label all possible matches  Label matches used for scoring 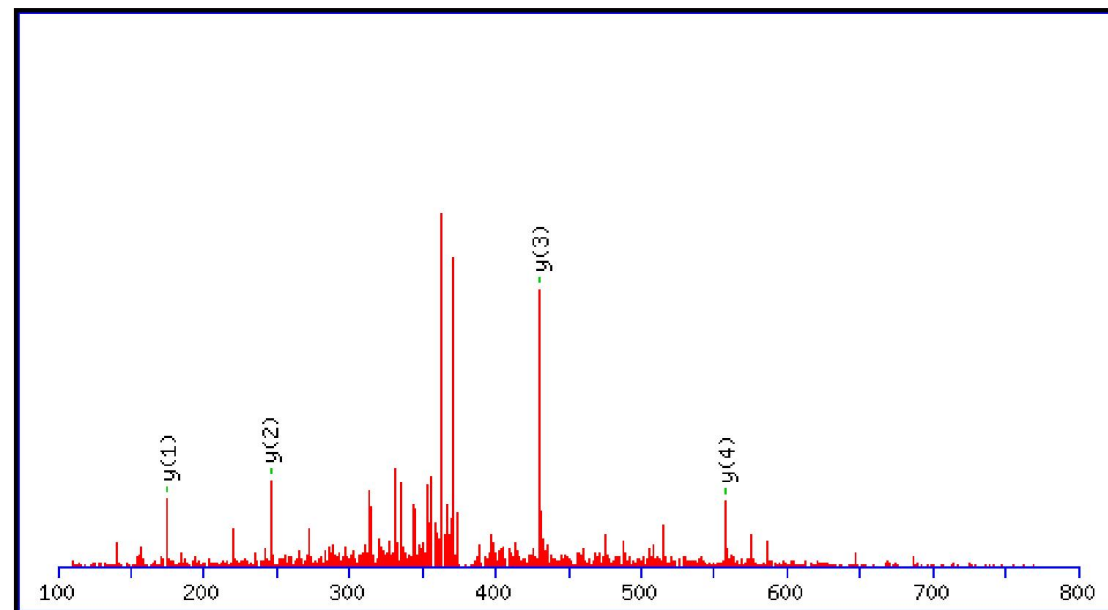**Monoisotopic mass of neutral peptide Mr(calc):** 759.4875**Fixed modifications:** Carbamidomethyl (C) (apply to specified residues or termini only)**Variable modifications:****K1** : Propionyl-(13CD3)Methyl (K)**K3** : Propionyl (K)**Ions Score:** 28 **Expect:** 0.29**Matches** : 4/32 fragment ions using 7 most in

| # | b        | b <sup>++</sup> | b <sup>*</sup> | b <sup>*++</sup> | Seq. | y               | y <sup>++</sup> | y <sup>*</sup> | y <sup>*++</sup> | # |
|---|----------|-----------------|----------------|------------------|------|-----------------|-----------------|----------------|------------------|---|
| 1 | 203.1663 | 102.0868        | 186.1397       | 93.5735          | K    |                 |                 |                |                  | 5 |
| 2 | 331.2249 | 166.1161        | 314.1983       | 157.6028         | Q    | <b>558.3358</b> | 279.6715        | 541.3093       | 271.1583         | 4 |
| 3 | 515.3460 | 258.1767        | 498.3195       | 249.6634         | K    | <b>430.2772</b> | 215.6423        | 413.2507       | 207.1290         | 3 |
| 4 | 586.3832 | 293.6952        | 569.3566       | 285.1819         | A    | <b>246.1561</b> | 123.5817        | 229.1295       | 115.0684         | 2 |
| 5 |          |                 |                |                  | R    | <b>175.1190</b> | 88.0631         | 158.0924       | 79.5498          | 1 |

Found in **Q68DK7-2**, Isoform 2 of Male-specific lethal 1 homolog OS=Homo sapiens GN=MSL1

Match to Query 2647: 988.501988 from(495.258270, 2+) intensity(927665.1875)

Title: File1311 Spectrum5755 scans: 6274

Data file I:\2013-9-13-Hela-Prometh-Fr7-ZW.mgf

Click mouse within plot area to zoom in by factor of two about that point

Or,   to  Da Label all possible matches  Label matches used for scoring 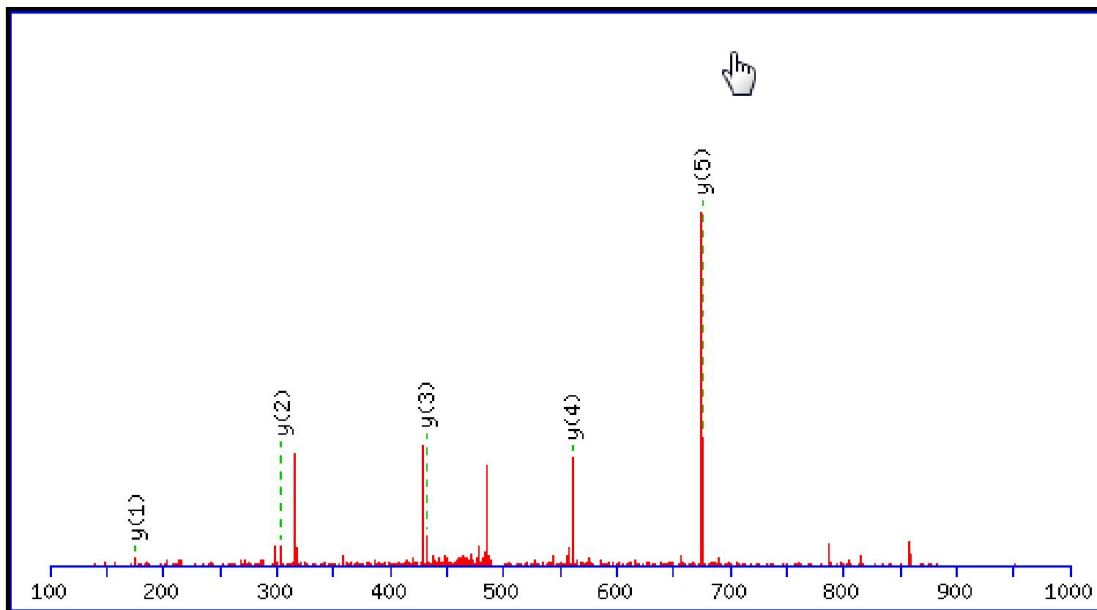**Monoisotopic mass of neutral peptide Mr(calc):** 987.4985**Fixed modifications:** Carbamidomethyl (C) (apply to specified residues or termini only)**Variable modifications:****K1** : Propionyl-Methylation (K)**Ions Score:** 21 **Expect:** 2.4**Matches** : 5/68 fragment ions using 17 most intense

| # | b        | b <sup>++</sup> | b <sup>+</sup> | b <sup>+++</sup> | b <sup>0</sup> | b <sup>0++</sup> | Seq. | y               | y <sup>++</sup> | y <sup>+</sup> | y <sup>+++</sup> | y <sup>0</sup> | y <sup>0++</sup> | # |
|---|----------|-----------------|----------------|------------------|----------------|------------------|------|-----------------|-----------------|----------------|------------------|----------------|------------------|---|
| 1 | 199.1441 | 100.0757        | 182.1176       | 91.5624          |                |                  | K    |                 |                 |                |                  |                |                  | 7 |
| 2 | 314.1710 | 157.5892        | 297.1445       | 149.0759         | 296.1605       | 148.5839         | D    | 790.3690        | 395.6881        | 773.3424       | 387.1748         | 772.3584       | 386.6828         | 6 |
| 3 | 428.2140 | 214.6106        | 411.1874       | 206.0974         | 410.2034       | 205.6053         | N    | <b>675.3420</b> | 338.1747        | 658.3155       | 329.6614         | 657.3315       | 329.1694         | 5 |
| 4 | 557.2566 | 279.1319        | 540.2300       | 270.6186         | 539.2460       | 270.1266         | E    | <b>561.2991</b> | 281.1532        | 544.2726       | 272.6399         | 543.2885       | 272.1479         | 4 |
| 5 | 685.3515 | 343.1794        | 668.3250       | 334.6661         | 667.3410       | 334.1741         | K    | <b>432.2565</b> | 216.6319        | 415.2300       | 208.1186         | 414.2459       | 207.6266         | 3 |
| 6 | 814.3941 | 407.7007        | 797.3676       | 399.1874         | 796.3836       | 398.6954         | E    | <b>304.1615</b> | 152.5844        | 287.1350       | 144.0711         | 286.1510       | 143.5791         | 2 |
| 7 |          |                 |                |                  |                |                  | R    | <b>175.1190</b> | 88.0631         | 158.0924       | 79.5498          |                |                  | 1 |

MS/MS Fragmentation of **AKKAR**Found in **B5MCF9**, Pescadillo homolog OS=Homo sapiens GN=PES1 PE=2 SV=1

Match to Query 29: 702.465668 from(352.240110, 2+) intensity(65698.5938)

Title: File1311 Spectrum2611 scans: 2997

Data file I:\2013-9-13-Hela-Prometh-Fr7-ZW.mgf

Click mouse within plot area to zoom in by factor of two about that point

Or,   to  Da Label all possible matches  Label matches used for scoring 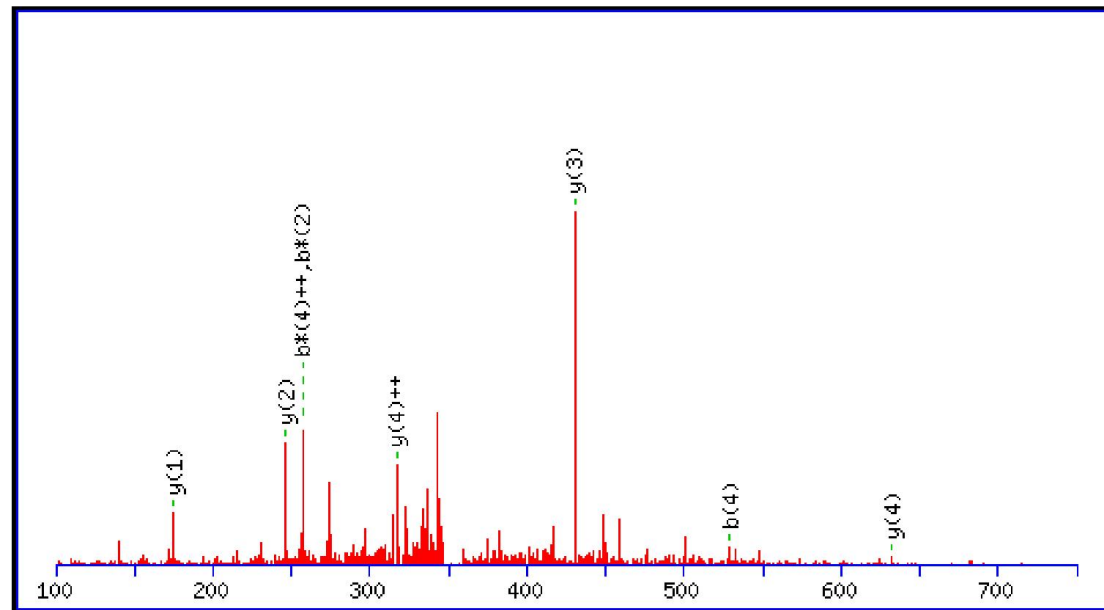**Monoisotopic mass of neutral peptide Mr(calc):** 702.4661**Fixed modifications:** Carbamidomethyl (C) (apply to specified residues or termini only)**Variable modifications:****K2** : Propionyl-(13CD3)Methyl (K)**K3** : Propionyl (K)**Ions Score:** 22 **Expect:** 0.81**Matches** : 8/30 fragment ions using 12 most intense peaks ([help](#))

| # | b        | b <sup>++</sup> | b*       | b <sup>*++</sup> | Seq. | y        | y <sup>++</sup> | y*       | y <sup>*++</sup> | # |
|---|----------|-----------------|----------|------------------|------|----------|-----------------|----------|------------------|---|
| 1 | 72.0444  | 36.5258         |          |                  | A    |          |                 |          |                  | 5 |
| 2 | 274.2034 | 137.6053        | 257.1769 | 129.0921         | K    | 632.4363 | 316.7218        | 615.4097 | 308.2085         | 4 |
| 3 | 458.3246 | 229.6659        | 441.2980 | 221.1527         | K    | 430.2772 | 215.6423        | 413.2507 | 207.1290         | 3 |
| 4 | 529.3617 | 265.1845        | 512.3351 | 256.6712         | A    | 246.1567 | 123.5817        | 229.1295 | 115.0684         | 2 |
| 5 |          |                 |          |                  | R    | 175.1190 | 88.0631         | 158.0924 | 79.5498          | 1 |

MS/MS Fragmentation of **NSAKAKK**Found in **A6NNR3**, Serine/threonine-protein phosphatase OS=Homo sapiens GN=PPP1CA PE=2 SV=1

Match to Query 1949: 931.560828 from(466.787690, 2+) intensity(160904.4219)

Title: File1311 Spectrum7804 scans: 8408

Data file I:\2013-9-13-Hela-Prometh-Fr7-ZW.mgf

Click mouse within plot area to zoom in by factor of two about that point

Or,   to  Da Label all possible matches  Label matches used for scoring 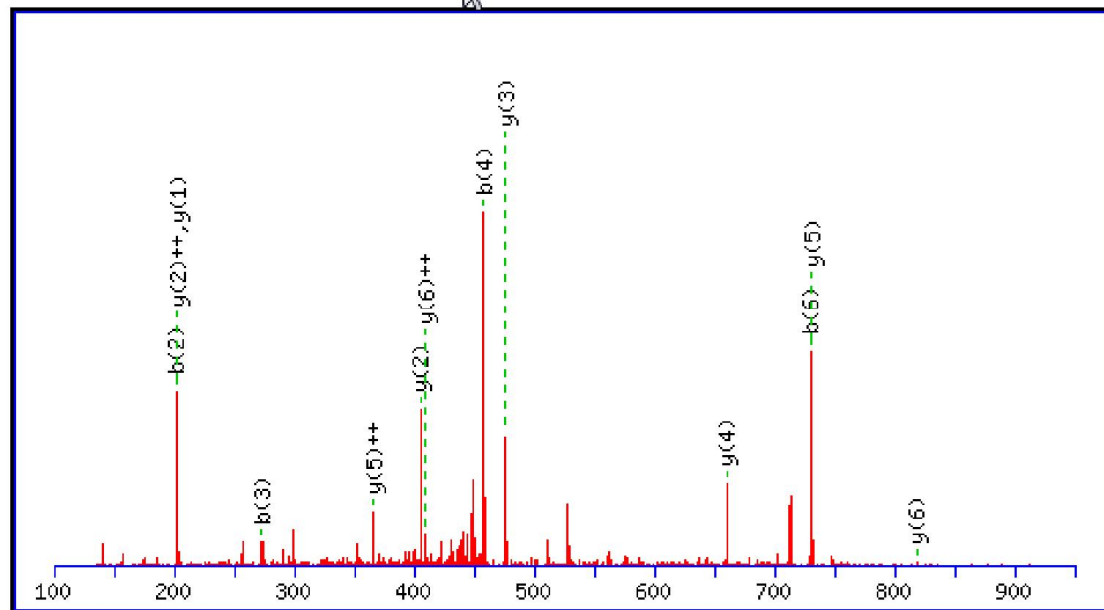**Monoisotopic mass of neutral peptide Mr(calc):** 931.5611**Fixed modifications:** Carbamidomethyl (C) (apply to specified residues or termini only)**Variable modifications:****K4** : Propionyl (K)**K6** : Propionyl-(13CD3)Methyl (K)**K7** : Propionyl (K)**Ions Score:** 39 **Expect:** 0.05**Matches** : 13/60 fragment ions using 24 most inter

| # | b               | b <sup>++</sup> | b <sup>+</sup> | b <sup>+</sup> ++ | b <sup>0</sup> | b <sup>0</sup> ++ | Seq. | y               | y <sup>++</sup> | y <sup>+</sup> | y <sup>+</sup> ++ | y <sup>0</sup> | y <sup>0</sup> ++ | # |
|---|-----------------|-----------------|----------------|-------------------|----------------|-------------------|------|-----------------|-----------------|----------------|-------------------|----------------|-------------------|---|
| 1 | 115.0502        | 58.0287         | 98.0237        | 49.5155           |                |                   | N    |                 |                 |                |                   |                |                   | 7 |
| 2 | <b>202.0822</b> | 101.5448        | 185.0557       | 93.0315           | 184.0717       | 92.5395           | S    | <b>818.5255</b> | <b>409.7664</b> | 801.4989       | 401.2531          | 800.5149       | 400.7611          | 6 |
| 3 | <b>273.1193</b> | 137.0633        | 256.0928       | 128.5500          | 255.1088       | 128.0580          | A    | <b>731.4934</b> | <b>366.2504</b> | 714.4669       | 357.7371          |                |                   | 5 |
| 4 | <b>457.2405</b> | 229.1239        | 440.2140       | 220.6106          | 439.2300       | 220.1186          | K    | <b>660.4563</b> | 330.7318        | 643.4298       | 322.2185          |                |                   | 4 |
| 5 | 528.2776        | 264.6425        | 511.2511       | 256.1292          | 510.2671       | 255.6372          | A    | <b>476.3351</b> | 238.6712        | 459.3086       | 230.1579          |                |                   | 3 |
| 6 | <b>730.4366</b> | 365.7220        | 713.4101       | 357.2087          | 712.4261       | 356.7167          | K    | <b>405.2980</b> | <b>203.1527</b> | 388.2715       | 194.6394          |                |                   | 2 |
| 7 |                 |                 |                |                   |                |                   | K    | <b>203.1390</b> | 102.0731        | 186.1125       | 93.5599           |                |                   | 1 |

Match to Query 130: 728.418988 from(365.216770, 2+) intensity(793862.6875)  
 Title: File1311 Spectrum4050 scans: 4498  
 Data file I:\2013-9-13-Hela-Prometh-Fr7-ZW.mgf

Click mouse within plot area to zoom in by factor of two about that point

Or,   to  Da

Label all possible matches  Label matches used for scoring

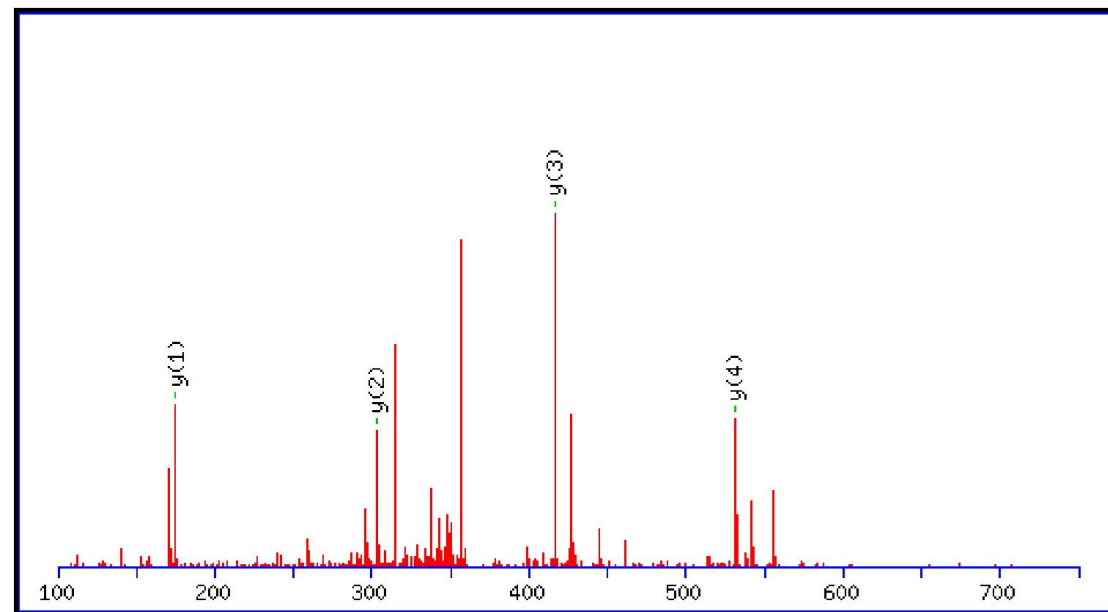

**Monoisotopic mass of neutral peptide Mr(calc):** 728.4181

**Fixed modifications:** Carbamidomethyl (C) (apply to specified residues or termini only)

**Variable modifications:**

**K1** : Propionyl-Methylation (K)

**Ions Score:** 36 **Expect:** 0.11

**Matches** : 4/40 fragment ions usir

| # | b        | b <sup>++</sup> | b*       | b <sup>+++</sup> | b <sup>0</sup> | b <sup>0++</sup> | Seq. | y               | y <sup>++</sup> | y*       | y <sup>+++</sup> | y <sup>0</sup> | y <sup>0++</sup> | # |
|---|----------|-----------------|----------|------------------|----------------|------------------|------|-----------------|-----------------|----------|------------------|----------------|------------------|---|
| 1 | 199.1441 | 100.0757        | 182.1176 | 91.5624          |                |                  | K    |                 |                 |          |                  |                |                  | 5 |
| 2 | 314.1710 | 157.5892        | 297.1445 | 149.0759         | 296.1605       | 148.5839         | D    | <b>531.2885</b> | 266.1479        | 514.2620 | 257.6346         | 513.2780       | 257.1426         | 4 |
| 3 | 427.2551 | 214.1312        | 410.2286 | 205.6179         | 409.2445       | 205.1259         | I    | <b>416.2616</b> | 208.6344        | 399.2350 | 200.1212         |                |                  | 3 |
| 4 | 555.3137 | 278.1605        | 538.2871 | 269.6472         | 537.3031       | 269.1552         | Q    | <b>303.1775</b> | 152.0924        | 286.1510 | 143.5791         |                |                  | 2 |
| 5 |          |                 |          |                  |                |                  | R    | <b>175.1190</b> | 88.0631         | 158.0924 | 79.5498          |                |                  | 1 |

Found in **G3V4E5**, Disks large-associated protein 5 (Fragment) OS=Homo sapiens GN=DLGAP5 PE=2 SV=1

Match to Query 14904: 2403.162012 from(802.061280, 3+) intensity(108761.6719)

Title: File1311 Spectrum12906 scans: 13723

Data file: I:\2013-9-13-Hela-Prometh-Fr7-ZW.mgf

Click mouse within plot area to zoom in by factor of two about that point

Or,   to  Da Label all possible matches  Label matches used for scoring 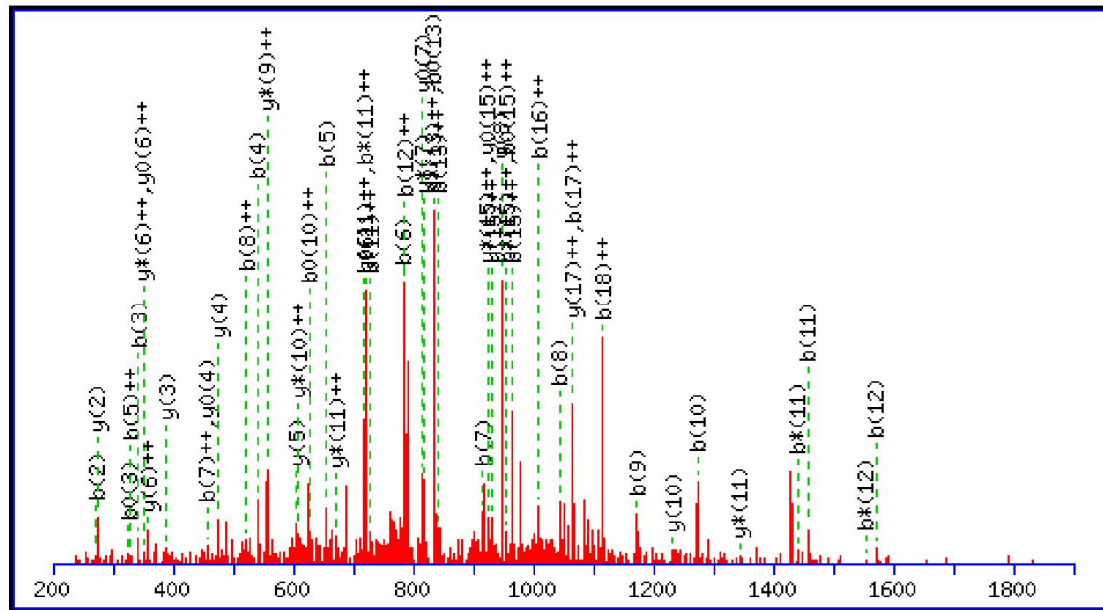**Monoisotopic mass of neutral peptide Mr(calc): 2403.1587****Fixed modifications:** Carbamidomethyl (C) (apply to specified residues)**Variable modifications:****K2** : Propionyl (K)**K4** : Propionyl-Methylation (K)**K11** : Propionyl (K)**Ions Score:** 45 **Expect:** 0.028**Matches** : 53/210 fragment ions using 116 most intense peaks ([help](#))

| #  | b                | b <sup>++</sup>  | b <sup>+</sup>   | b <sup>+++</sup> | b <sup>0</sup>  | b <sup>0++</sup> | Seq. | y                | y <sup>++</sup>  | y <sup>+</sup>   | y <sup>+++</sup> | y <sup>0</sup>  | y <sup>0++</sup> | #  |
|----|------------------|------------------|------------------|------------------|-----------------|------------------|------|------------------|------------------|------------------|------------------|-----------------|------------------|----|
| 1  | 88.0393          | 44.5233          |                  |                  | 70.0287         | 35.5180          | S    |                  |                  |                  |                  |                 |                  | 19 |
| 2  | <b>272.1605</b>  | 136.5839         | 255.1339         | 128.0706         | 254.1499        | 127.5786         | K    | 2317.1340        | 1159.0706        | 2300.1075        | 1150.5574        | 2299.1235       | 1150.0654        | 18 |
| 3  | <b>343.1976</b>  | 172.1024         | 326.1710         | 163.5892         | <b>325.1870</b> | 163.0972         | A    | 2133.0128        | <b>1067.0101</b> | 2115.9863        | 1058.4968        | 2115.0023       | 1058.0048        | 17 |
| 4  | <b>541.3344</b>  | 271.1709         | 524.3079         | 262.6576         | 523.3239        | 262.1656         | K    | 2061.9757        | 1031.4915        | 2044.9492        | 1022.9782        | 2043.9652       | 1022.4862        | 16 |
| 5  | <b>656.3614</b>  | <b>328.6843</b>  | 639.3348         | 320.1710         | 638.3508        | 319.6790         | D    | 1863.8389        | <b>952.4231</b>  | 1846.8123        | <b>923.9098</b>  | 1845.8283       | <b>923.4178</b>  | 15 |
| 6  | <b>794.4199</b>  | 392.7136         | 767.3934         | 384.2003         | 766.4094        | 383.7083         | Q    | 1748.8120        | 874.9096         | 1731.7854        | 866.3963         | 1730.8014       | 865.9043         | 14 |
| 7  | <b>915.4604</b>  | <b>458.2339</b>  | 898.4339         | 449.7206         | 897.4499        | 449.2286         | I    | 1620.7534        | 810.3803         | 1603.7268        | 802.3871         | 1602.7428       | 801.9750         | 13 |
| 8  | <b>1044.5030</b> | <b>522.7562</b>  | 1027.4765        | 514.2419         | 1026.4925       | 513.7499         | E    | 1489.7129        | 745.3601         | 1472.6863        | 736.8468         | 1471.7023       | 736.3548         | 12 |
| 9  | <b>1172.5616</b> | 586.7844         | 1155.5351        | 578.2712         | 1154.5510       | 577.7792         | Q    | 1360.6703        | 680.3388         | <b>1343.6438</b> | <b>672.3255</b>  | 1342.6597       | 671.8335         | 11 |
| 10 | <b>1273.6093</b> | 637.3083         | 1256.5827        | 628.7950         | 1255.5987       | <b>628.3030</b>  | T    | <b>1232.6117</b> | 616.3095         | 1215.5852        | <b>608.2962</b>  | 1214.6012       | 607.3042         | 10 |
| 11 | <b>1457.7305</b> | <b>729.3689</b>  | <b>1440.7039</b> | <b>720.8556</b>  | 1439.7199       | <b>720.3636</b>  | K    | 1131.5640        | 566.2857         | 1114.5375        | <b>557.7724</b>  | 1113.5535       | 557.2804         | 9  |
| 12 | <b>1570.8145</b> | <b>785.9109</b>  | <b>1553.7880</b> | <b>777.3976</b>  | 1552.8040       | 776.9056         | I    | <b>947.4429</b>  | 474.2251         | 930.4163         | 465.7118         | 929.4323        | 465.2198         | 8  |
| 13 | 1685.8415        | <b>843.4244</b>  | 1668.8149        | <b>834.9111</b>  | 1667.8309       | <b>834.4191</b>  | D    | <b>834.3588</b>  | 417.6830         | <b>817.3323</b>  | 409.1698         | <b>816.3482</b> | 408.6778         | 7  |
| 14 | 1799.8844        | 900.4458         | 1782.8578        | 891.9326         | 1781.8738       | 891.4406         | N    | <b>719.3319</b>  | <b>360.1696</b>  | 702.3053         | <b>351.6563</b>  | 701.3213        | <b>351.1643</b>  | 6  |
| 15 | 1928.9270        | <b>964.9672</b>  | 1911.9004        | <b>956.4539</b>  | 1910.9164       | <b>955.9619</b>  | E    | <b>605.2889</b>  | 303.1481         | 588.2624         | 294.6348         | 587.2704        | 294.1428         | 5  |
| 16 | 2015.9690        | <b>1008.4832</b> | 1998.9325        | 999.9699         | 1997.9484       | 999.4779         | S    | <b>476.2463</b>  | 238.6268         | 459.2198         | 230.1135         | <b>458.2368</b> | 229.6215         | 4  |
| 17 | 2130.9860        | <b>1065.9966</b> | 2113.9594        | 1057.4833        | 2112.9754       | 1056.9913        | D    | <b>389.2143</b>  | 195.1108         | 372.1878         | 186.5975         | 371.2037        | 186.1055         | 3  |
| 18 | 2230.0544        | <b>1115.5308</b> | 2213.0278        | 1107.0175        | 2212.0438       | 1106.5255        | V    | <b>274.1874</b>  | 137.5973         | 257.1608         | 129.0840         |                 |                  | 2  |
| 19 |                  |                  |                  |                  |                 |                  | R    | 175.1190         | 88.0631          | 158.0924         | 79.5493          |                 |                  | 1  |

Found in **POCOS8**, Histone H2A type 1 OS=Homo sapiens GN=HIST1H2AG PE=1 SV=2

Match to Query 1871: 926.529448 from(464.272000, 2+) intensity(1713716.2500)

Title: File1311 Spectrum2889 scans: 3287

Data file I:\2013-9-13-Hela-Prometh-Fr7-ZW.mgf

Click mouse within plot area to zoom in by factor of two about that point

Or,   to  Da Label all possible matches  Label matches used for scoring 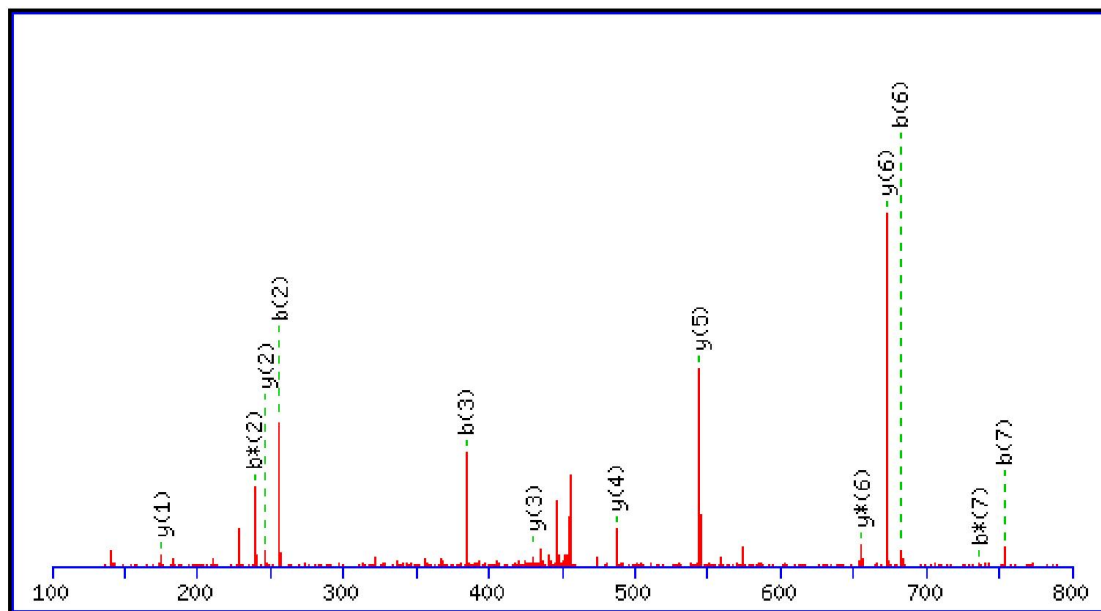**Monoisotopic mass of neutral peptide Mr(calc):** 926.5298**Fixed modifications:** Carbamidomethyl (C) (apply to specified residues or**Variable modifications:****K2** : Propionyl-Methylation (K)**K6** : Propionyl (K)**Ions Score:** 40 **Expect:** 0.038**Matches** : 13/54 fragment ions using 28 most intense peaks ([help](#))

| # | b               | b <sup>++</sup> | b*              | b <sup>+++</sup> | Seq. | y               | y <sup>++</sup> | y*              | y <sup>+++</sup> | # |
|---|-----------------|-----------------|-----------------|------------------|------|-----------------|-----------------|-----------------|------------------|---|
| 1 | 58.0287         | 29.5180         |                 |                  | G    |                 |                 |                 |                  | 8 |
| 2 | <b>256.1656</b> | 128.5864        | <b>239.1390</b> | 120.0731         | K    | 870.5156        | 435.7614        | 853.4890        | 427.2482         | 7 |
| 3 | <b>384.2241</b> | 192.6157        | 367.1976        | 184.1024         | Q    | <b>672.3788</b> | 336.6930        | <b>655.3522</b> | 328.1797         | 6 |
| 4 | 441.2456        | 221.1264        | 424.2191        | 212.6132         | G    | <b>544.3202</b> | 272.6637        | 527.2936        | 264.1504         | 5 |
| 5 | 498.2671        | 249.6372        | 481.2405        | 241.1239         | G    | <b>487.2987</b> | 244.1530        | 470.2722        | 235.6397         | 4 |
| 6 | <b>682.3883</b> | 341.6978        | 665.3617        | 333.1845         | K    | <b>430.2772</b> | 215.6423        | 413.2507        | 207.1290         | 3 |
| 7 | <b>753.4254</b> | 377.2163        | <b>736.3988</b> | 368.7030         | A    | <b>246.1561</b> | 123.5817        | 229.1295        | 115.0684         | 2 |
| 8 |                 |                 |                 |                  | R    | <b>175.1190</b> | 88.0631         | 158.0924        | 79.5498          | 1 |



Match to Query 2003: 934.534268 from(468.274410, 2+) intensity(141504.0938)

Title: File1311 Spectrum2562 scans: 2946

Data file I:\2013-9-13-Hela-Prometh-Fr7-ZW.mgf

Click mouse within plot area to zoom in by factor of two about that point

Or,   to  Da Label all possible matches  Label matches used for scoring 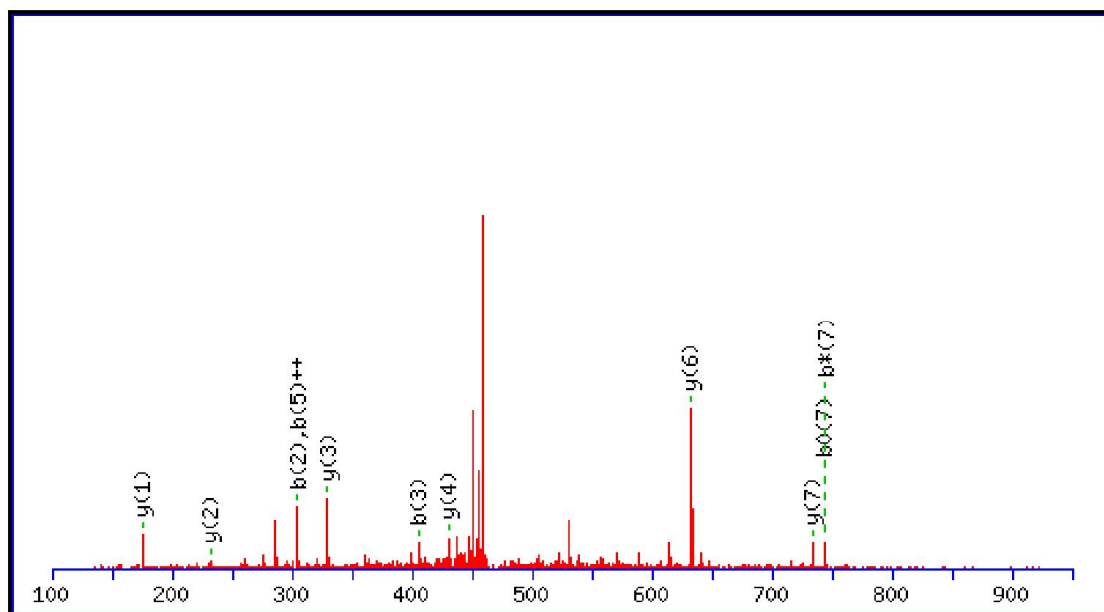Monoisotopic mass of neutral peptide **Mr(calc)**: 934.5356

Fixed modifications: Carbamidomethyl (C) (apply to specified residues or termini only)

Variable modifications:

**K1** : Propionyl-(13CD3)Methyl (K)

Ions Score: 51 Expect: 0.0037

Matches : 11/76 fragment ions using 16 most intense

| # | b               | b <sup>++</sup> | b*              | b <sup>+++</sup> | b <sup>0</sup>  | b <sup>0++</sup> | Seq.     | y               | y <sup>++</sup> | y*       | y <sup>+++</sup> | y <sup>0</sup> | y <sup>0++</sup> | # |
|---|-----------------|-----------------|-----------------|------------------|-----------------|------------------|----------|-----------------|-----------------|----------|------------------|----------------|------------------|---|
| 1 | 203.1663        | 102.0868        | 186.1397        | 93.5735          |                 |                  | <b>K</b> |                 |                 |          |                  |                |                  | 8 |
| 2 | <b>304.2140</b> | 152.6106        | 287.1874        | 144.0973         | 286.2034        | 143.6053         | <b>T</b> | <b>733.3839</b> | 367.1956        | 716.3573 | 358.6823         | 715.3733       | 358.1903         | 7 |
| 3 | <b>405.2616</b> | 203.1345        | 388.2351        | 194.6212         | 387.2511        | 194.1292         | <b>T</b> | <b>632.3362</b> | 316.6717        | 615.3097 | 308.1585         | 614.3257       | 307.6665         | 6 |
| 4 | 506.3093        | 253.6583        | 489.2828        | 245.1450         | 488.2988        | 244.6530         | <b>T</b> | 531.2885        | 266.1479        | 514.2620 | 257.6346         | 513.2780       | 257.1426         | 5 |
| 5 | 607.3570        | <b>304.1821</b> | 590.3305        | 295.6689         | 589.3464        | 295.1769         | <b>T</b> | <b>430.2409</b> | 215.6241        | 413.2143 | 207.1108         | 412.2303       | 206.6188         | 4 |
| 6 | 704.4098        | 352.7085        | 687.3832        | 344.1952         | 686.3992        | 343.7032         | <b>P</b> | <b>329.1932</b> | 165.1002        | 312.1666 | 156.5870         |                |                  | 3 |
| 7 | 761.4312        | 381.2193        | <b>744.4047</b> | 372.7060         | <b>743.4207</b> | 372.2140         | <b>G</b> | <b>232.1404</b> | 116.5738        | 215.1139 | 108.0606         |                |                  | 2 |
| 8 |                 |                 |                 |                  |                 |                  | <b>R</b> | <b>175.1190</b> | 88.0631         | 158.0924 | 79.5498          |                |                  | 1 |

Match to Query 1216: 864.494108 from(433.254330,2+) intensity(315867.2188)

Title: File1311 Spectrum1354 scans: 1681

Data file I:\2013-9-13-Hela-Prometh-Fr7-ZW.mgf

Click mouse within plot area to zoom in by factor of two about that point

Or,   to  Da Label all possible matches  Label matches used for scoring 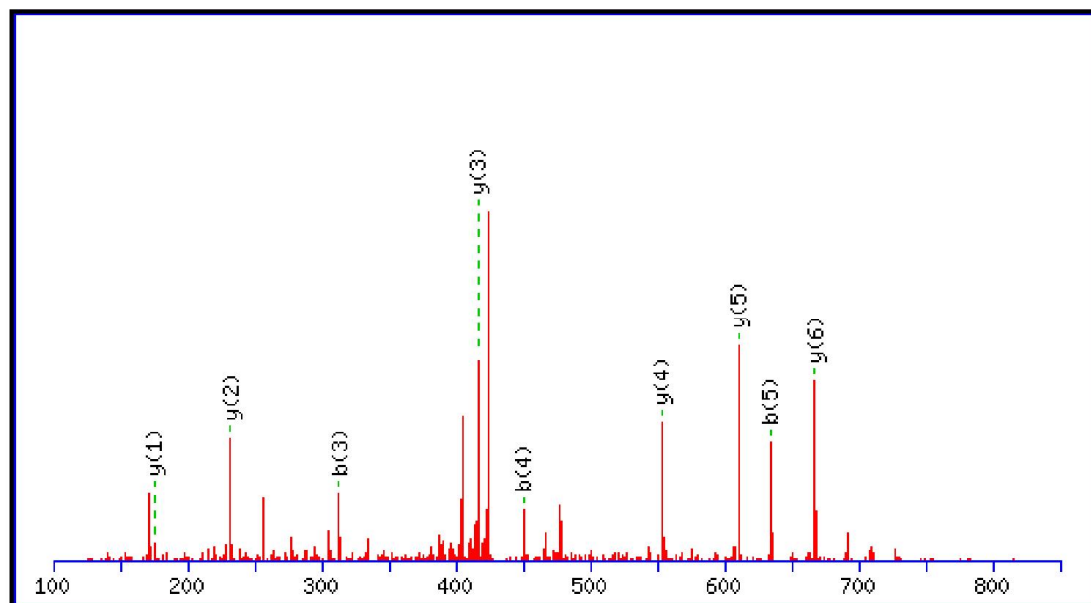**Monoisotopic mass of neutral peptide Mr(calc):** 864.4930**Fixed modifications:** Carbamidomethyl (C) (apply to specified residues or termini only)**Variable modifications:****K1** : Propionyl-Methylation (K)**K5** : Propionyl (K)**Ions Score:** 52 **Expect:** 0.0024**Matches** : 9/48 fragment ions using 14 most intense peaks

| # | b               | b <sup>++</sup> | b*       | b* <sup>++</sup> | Seq.     | y               | y <sup>++</sup> | y*       | y* <sup>++</sup> | #        |
|---|-----------------|-----------------|----------|------------------|----------|-----------------|-----------------|----------|------------------|----------|
| 1 | 199.1441        | 100.0757        | 182.1176 | 91.5624          | <b>K</b> |                 |                 |          |                  | <b>7</b> |
| 2 | 256.1656        | 128.5864        | 239.1390 | 120.0731         | <b>G</b> | <b>667.3634</b> | 334.1854        | 650.3369 | 325.6721         | <b>6</b> |
| 3 | <b>313.1870</b> | 157.0972        | 296.1605 | 148.5839         | <b>G</b> | <b>610.3420</b> | 305.6746        | 593.3154 | 297.1613         | <b>5</b> |
| 4 | <b>450.2459</b> | 225.6266        | 433.2194 | 217.1133         | <b>H</b> | <b>553.3205</b> | 277.1639        | 536.2940 | 268.6506         | <b>4</b> |
| 5 | <b>634.3671</b> | 317.6872        | 617.3406 | 309.1739         | <b>K</b> | <b>416.2616</b> | 208.6344        | 399.2350 | 200.1212         | <b>3</b> |
| 6 | 691.3886        | 346.1979        | 674.3620 | 337.6847         | <b>G</b> | <b>232.1404</b> | 116.5738        | 215.1139 | 108.0606         | <b>2</b> |
| 7 |                 |                 |          |                  | <b>R</b> | <b>175.1190</b> | 88.0631         | 158.0924 | 79.5498          | <b>1</b> |

Match to Query 6642: 1342.686248 from(672.350400, 2+) intensity(15790.3203)

Title: File1311 Spectrum243 scans: 465

Data file I:\2013-9-13-Hela-Prometh-Fr7-ZW.mgf

Click mouse within plot area to zoom in by factor of two about that point

Or,   to  DaLabel all possible matches  Label matches used for scoring 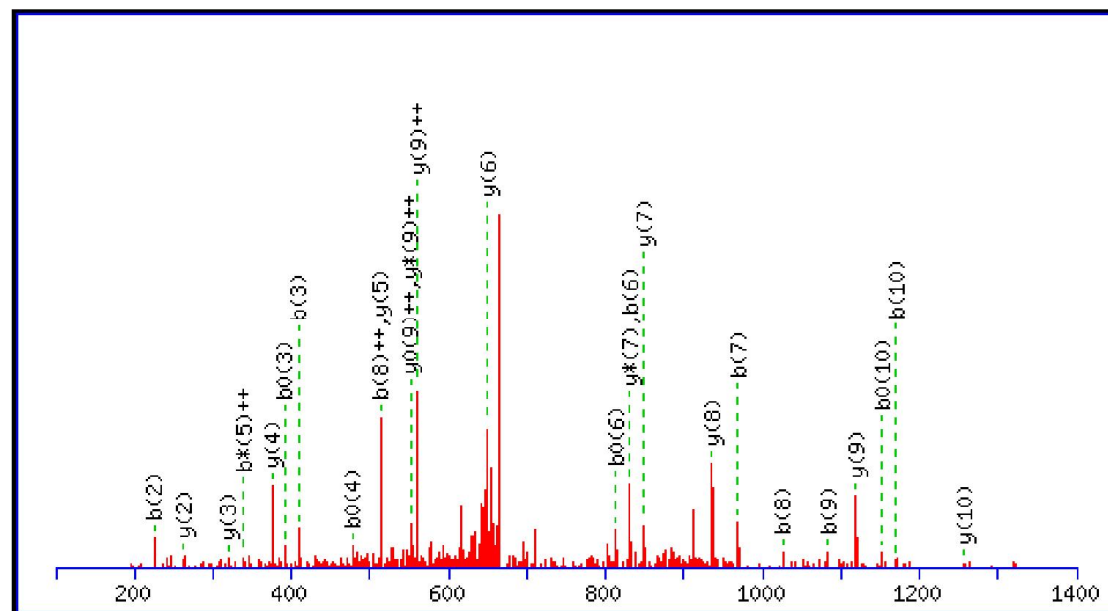Monoisotopic mass of neutral peptide  $M_r(\text{calc})$ : 1342.6854

Fixed modifications: Carbamidomethyl (C) (apply to specified residues or termini only)

Variable modifications:

**K3** : Propionyl (K)**K5** : Propionyl-Methylation (K)

Ions Score: 45 Expect: 0.019

Matches : 26/114 fragment ions using 56 most intense pe

| #  | b                | b <sup>++</sup> | b*        | b <sup>+++</sup> | b <sup>0</sup>   | b <sup>0++</sup> | Seq. | y                | y <sup>++</sup> | y*              | y <sup>+++</sup> | y <sup>0</sup> | y <sup>0++</sup> | #  |
|----|------------------|-----------------|-----------|------------------|------------------|------------------|------|------------------|-----------------|-----------------|------------------|----------------|------------------|----|
| 1  | 88.0393          | 44.5233         |           |                  | 70.0287          | 35.5180          | S    |                  |                 |                 |                  |                |                  | 11 |
| 2  | <b>225.0982</b>  | 113.0527        |           |                  | 207.0877         | 104.0475         | H    | <b>1256.6607</b> | 628.8340        | 1239.6341       | 620.3207         | 1238.6501      | 619.8287         | 10 |
| 3  | <b>409.2194</b>  | 205.1133        | 392.1923  | 196.6001         | <b>391.2083</b>  | 196.1081         | K    | <b>1119.6018</b> | <b>560.3045</b> | 1102.5752       | <b>551.7912</b>  | 1101.5912      | <b>551.2992</b>  | 9  |
| 4  | 496.2514         | 248.6293        | 479.2249  | 240.1161         | <b>478.2409</b>  | 239.6241         | S    | <b>935.4806</b>  | 468.2439        | 918.4540        | 459.7307         | 917.4700       | 459.2386         | 8  |
| 5  | 694.3883         | 347.6978        | 677.3617  | <b>339.1845</b>  | 676.3777         | 338.6925         | K    | <b>848.4486</b>  | 424.7279        | <b>831.4220</b> | 416.2146         | 830.4380       | 415.7226         | 7  |
| 6  | <b>831.4472</b>  | 416.2272        | 814.4206  | 407.7139         | <b>813.4366</b>  | 407.2219         | H    | <b>650.3117</b>  | 325.6595        | 633.2852        | 317.1462         | 632.3012       | 316.6542         | 6  |
| 7  | <b>968.5061</b>  | 484.7567        | 951.4795  | 476.2434         | 950.4955         | 475.7514         | H    | <b>513.2528</b>  | 257.1300        | 496.2263        | 248.6168         | 495.2423       | 248.1248         | 5  |
| 8  | <b>1025.5275</b> | <b>513.2674</b> | 1008.5010 | 504.7541         | 1007.5170        | 504.2621         | G    | <b>376.1939</b>  | 188.6006        | 359.1674        | 180.0873         | 358.1833       | 179.5953         | 4  |
| 9  | <b>1082.5490</b> | 541.7781        | 1065.5225 | 533.2649         | 1064.5384        | 532.7729         | G    | <b>319.1724</b>  | 160.0899        | 302.1459        | 151.5766         | 301.1619       | 151.0846         | 3  |
| 10 | <b>1169.5810</b> | 585.2942        | 1152.5545 | 576.7809         | <b>1151.5705</b> | 576.2889         | S    | <b>262.1510</b>  | 131.5791        | 245.1244        | 123.0659         | 244.1404       | 122.5738         | 2  |
| 11 |                  |                 |           |                  |                  |                  | R    | 175.1190         | 88.0631         | 158.0924        | 79.5498          |                |                  |    |

Match to Query 859: 830.449928 from(416.232240, 2+) intensity(344523.0938)

Title: File1311 Spectrum6331 scans: 6874

Data file I:\2013-9-13-Hela-Prometh-Fr7-ZW.mgf

Click mouse within plot area to zoom in by factor of two about that point

Or,   to  Da Label all possible matches  Label matches used for scoring 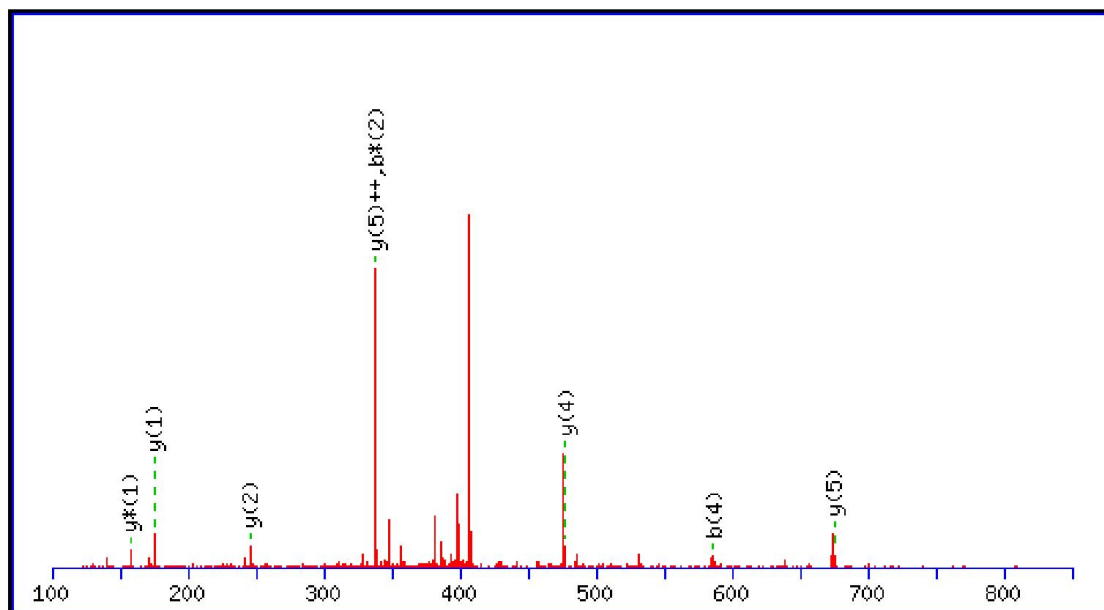**Monoisotopic mass of neutral peptide Mr(calc):** 830.4545**Fixed modifications:** Carbamidomethyl (C) (apply to specified residues or termini only)**Variable modifications:****K2** : Propionyl-Methylation (K)**Ions Score:** 21 **Expect:** 4.5**Matches** : 8/40 fragment ions using 14 most intense peaks

| # | b        | b <sup>++</sup> | b*       | b <sup>*++</sup> | Seq. | y        | y <sup>++</sup> | y*       | y <sup>*++</sup> | # |
|---|----------|-----------------|----------|------------------|------|----------|-----------------|----------|------------------|---|
| 1 | 157.1084 | 79.0578         | 140.0818 | 70.5446          | R    |          |                 |          |                  | 6 |
| 2 | 338.2452 | 178.1262        | 338.2187 | 169.6130         | K    | 675.3607 | 338.1840        | 658.3341 | 329.6707         | 5 |
| 3 | 515.2759 | 258.1416        | 498.2493 | 249.6283         | C    | 477.2238 | 239.1156        | 460.1973 | 230.6023         | 4 |
| 4 | 586.3130 | 293.6601        | 569.2864 | 285.1469         | A    | 317.1932 | 159.1002        | 300.1666 | 150.5870         | 3 |
| 5 | 657.3501 | 329.1787        | 640.3235 | 320.6654         | A    | 246.1561 | 123.5817        | 229.1295 | 115.0684         | 2 |
| 6 |          |                 |          |                  | R    | 175.1190 | 88.0631         | 158.0924 | 79.5498          | 1 |

MS/MS Fragmentation of **TSKSKGSSR**Found in **B1AL79**, Protein kinase N2, isoform CRA\_b OS=Homo sapiens GN=PKN2 PE=2 SV=1

Match to Query 4816: 1153.621548 from(577.818050, 2+) intensity(137975.8750)

Title: File1311 Spectrum3077 scans: 3482

Data file I:\2013-9-13-Hela-Prometh-Fr7-ZW.mgf

Click mouse within plot area to zoom in by factor of two about that point

Or,   to  Da Label all possible matches  Label matches used for scoring 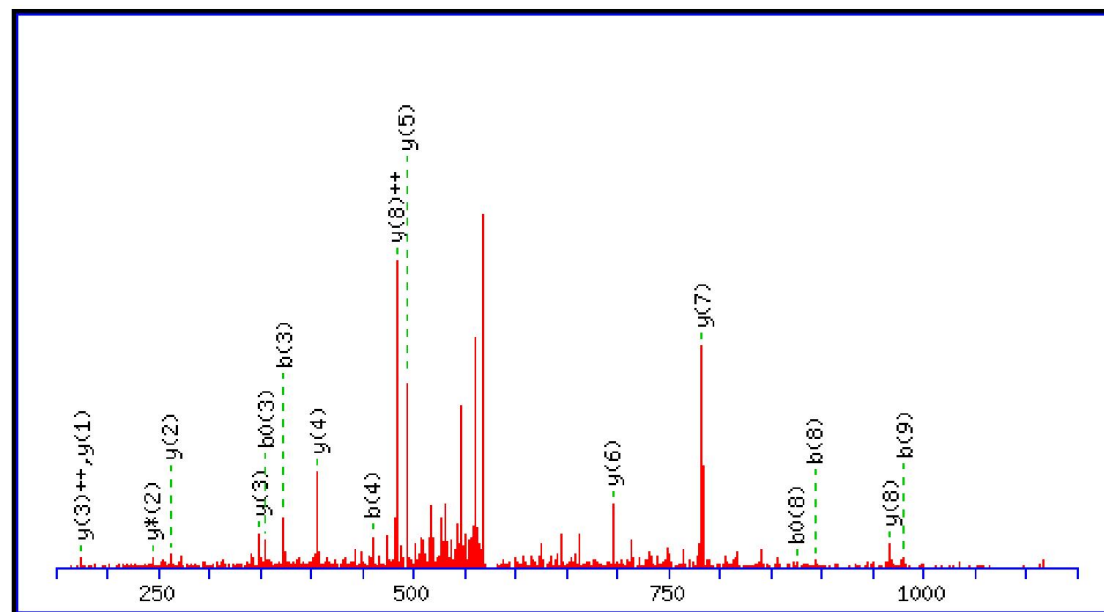**Monoisotopic mass of neutral peptide Mr(calc):** 1153.6211**Fixed modifications:** Carbamidomethyl (C) (apply to specified residues or termini only)**Variable modifications:****K3** : Propionyl (K)**K5** : Propionyl-(13CD3)Methyl (K)**Ions Score:** 59 **Expect:** 0.0006**Matches** : 17/102 fragment ions using 30 most intense

| #  | b               | b <sup>++</sup> | b <sup>+</sup> | b <sup>*++</sup> | b <sup>0</sup>  | b <sup>0++</sup> | Seq. | y               | y <sup>++</sup> | y <sup>+</sup>  | y <sup>*++</sup> | y <sup>0</sup> | y <sup>0++</sup> | #  |
|----|-----------------|-----------------|----------------|------------------|-----------------|------------------|------|-----------------|-----------------|-----------------|------------------|----------------|------------------|----|
| 1  | 102.0550        | 51.5311         |                |                  | 84.0444         | 42.5258          | T    |                 |                 |                 |                  |                |                  | 10 |
| 2  | 189.0870        | 95.0471         |                |                  | 171.0764        | 86.0418          | S    | 1053.5807       | 527.2940        | 1036.5542       | 518.7807         | 1035.5702      | 518.2887         | 9  |
| 3  | <b>373.2082</b> | 187.1077        | 356.1816       | 178.5944         | <b>355.1976</b> | 178.1024         | K    | <b>966.5487</b> | <b>483.7780</b> | 949.5222        | 475.2647         | 948.5382       | 474.7727         | 8  |
| 4  | <b>460.2402</b> | 230.6237        | 443.2136       | 222.1105         | 442.2296        | 221.6184         | S    | <b>782.4275</b> | 391.7174        | 765.4010        | 383.2041         | 764.4170       | 382.7121         | 7  |
| 5  | 662.3992        | 331.7032        | 645.3727       | 323.1900         | 644.3886        | 322.6980         | K    | <b>695.3955</b> | 348.2014        | 678.3690        | 339.6881         | 677.3849       | 339.1961         | 6  |
| 6  | 749.4312        | 375.2193        | 732.4047       | 366.7060         | 731.4207        | 366.2140         | S    | <b>493.2365</b> | 247.1219        | 476.2100        | 238.6086         | 475.2259       | 238.1166         | 5  |
| 7  | 806.4527        | 403.7300        | 789.4261       | 395.2167         | 788.4421        | 394.7247         | G    | <b>406.2045</b> | 203.6059        | 389.1779        | 195.0926         | 388.1939       | 194.6006         | 4  |
| 8  | <b>893.4847</b> | 447.2460        | 876.4582       | 438.7327         | <b>875.4742</b> | 438.2407         | S    | <b>349.1830</b> | 175.0951        | 332.1565        | 166.5819         | 331.1724       | 166.0899         | 3  |
| 9  | <b>980.5167</b> | 490.7620        | 963.4902       | 482.2487         | 962.5062        | 481.7567         | S    | <b>262.1510</b> | 131.5791        | <b>245.1244</b> | 123.0659         | 244.1404       | 122.5738         | 2  |
| 10 |                 |                 |                |                  |                 |                  | R    | <b>175.1190</b> | 88.0631         | 158.0924        | 79.5498          |                |                  | 1  |

Match to Query 4007: 1014.545928 from(508.280240, 2+) intensity(68414.4844)

Title: File1326 Spectrum2732 scans: 3071

Data file I:\2013-9-13-Hela-Prometh-Fr6-ZW.mgf

Click mouse within plot area to zoom in by factor of two about that point

Or,   to  Da Label all possible matches  Label matches used for scoring 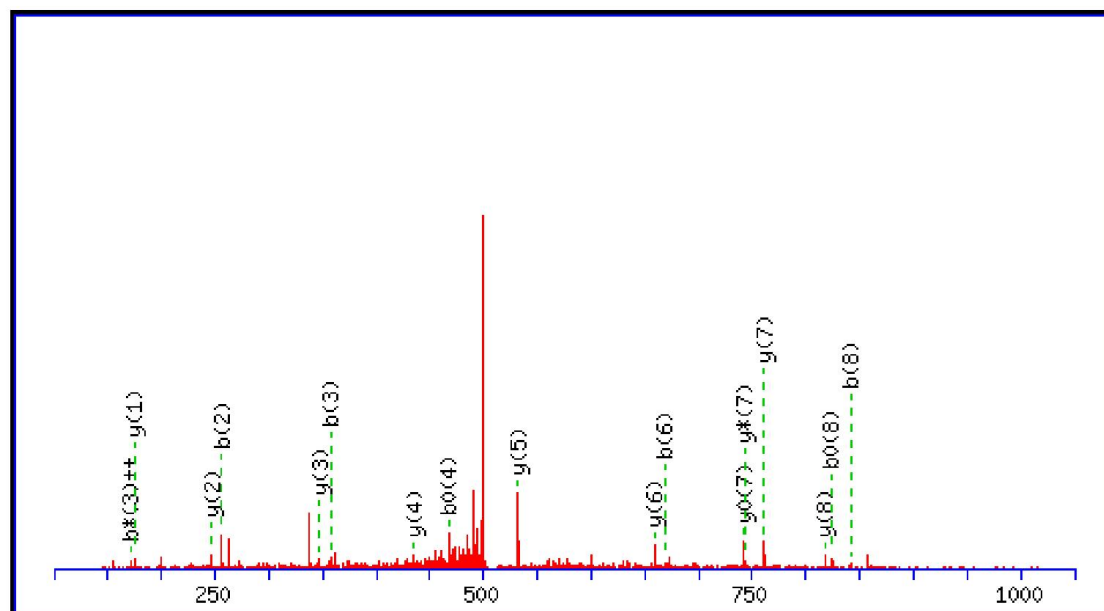**Monoisotopic mass of neutral peptide Mr(calc):** 1014.5458**Fixed modifications:** Carbamidomethyl (C) (apply to specified residues or termini only)**Variable modifications:****K1** : Propionyl-Methylation (K)**Ions Score:** 38 **Expect:** 0.074**Matches** : 17/88 fragment ions using 54 most intens

| # | b               | b <sup>++</sup> | b*       | b <sup>+++</sup> | b <sup>0</sup>  | b <sup>0++</sup> | Seq.     | y               | y <sup>++</sup> | y*              | y <sup>+++</sup> | y <sup>0</sup>  | y <sup>0++</sup> | # |
|---|-----------------|-----------------|----------|------------------|-----------------|------------------|----------|-----------------|-----------------|-----------------|------------------|-----------------|------------------|---|
| 1 | 199.1441        | 100.0757        | 182.1176 | 91.5624          |                 |                  | <b>K</b> |                 |                 |                 |                  |                 |                  | 9 |
| 2 | <b>256.1656</b> | 128.5864        | 239.1390 | 120.0731         |                 |                  | <b>G</b> | <b>817.4163</b> | 409.2118        | 800.3897        | 400.6985         | 799.4057        | 400.2065         | 8 |
| 3 | <b>357.2132</b> | 179.1103        | 340.1867 | <b>170.5970</b>  | 339.2027        | 170.1050         | <b>T</b> | <b>760.3948</b> | 380.7010        | <b>743.3682</b> | 372.1878         | <b>742.3842</b> | 371.6958         | 7 |
| 4 | 485.2718        | 243.1396        | 468.2453 | 234.6263         | <b>467.2613</b> | 234.1343         | <b>Q</b> | <b>659.3471</b> | 330.1772        | 642.3206        | 321.6639         | 641.3365        | 321.1719         | 6 |
| 5 | 582.3246        | 291.6659        | 565.2980 | 283.1527         | 564.3140        | 282.6607         | <b>P</b> | <b>531.2885</b> | 266.1479        | 514.2620        | 257.6346         | 513.2780        | 257.1426         | 5 |
| 6 | <b>669.3566</b> | 335.1819        | 652.3301 | 326.6687         | 651.3461        | 326.1767         | <b>S</b> | <b>434.2358</b> | 217.6215        | 417.2092        | 209.1083         | 416.2252        | 208.6162         | 4 |
| 7 | 770.4043        | 385.7058        | 753.3777 | 377.1925         | 752.3937        | 376.7005         | <b>I</b> | <b>347.2037</b> | 174.1055        | 330.1772        | 165.5922         | 329.1932        | 165.1002         | 3 |
| 8 | <b>841.4414</b> | 421.2243        | 824.4149 | 412.7111         | <b>823.4308</b> | 412.2191         | <b>A</b> | <b>246.1561</b> | 123.5817        | 229.1295        | 115.0684         |                 |                  | 2 |
| 9 |                 |                 |          |                  |                 |                  | <b>R</b> | <b>175.1190</b> | 88.0631         | 158.0924        | 79.5498          |                 |                  | 1 |

Match to Query 1997: 889.490628 from(445.752590, 2+) intensity(101574.2188)

Title: File1326 Spectrum2044 scans: 2353

Data file I:\2013-9-13-Hela-Prometh-Fr6-ZW.mgf

Click mouse within plot area to zoom in by factor of two about that point

Or,   to  Da

Label all possible matches  Label matches used for scoring

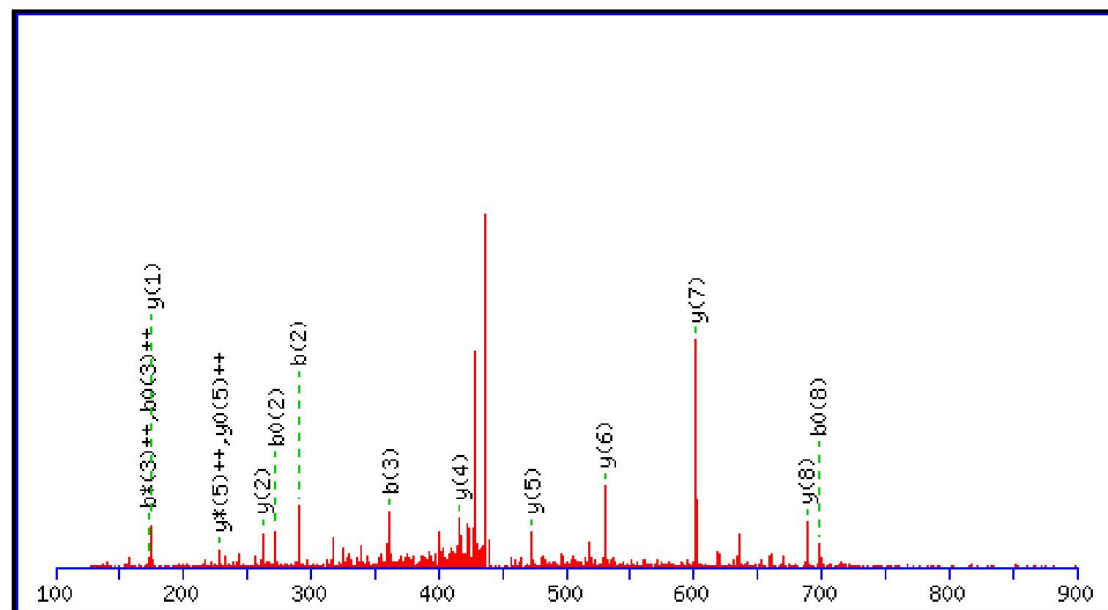

**Monoisotopic mass of neutral peptide Mr(calc): 889.4890**

**Fixed modifications:** Carbamidomethyl (C) (apply to specified residues or termini only)

**Variable modifications:**

**K1** : Propionyl-(13CD3)Methyl (K)

**Ions Score: 47** **Expect: 0.0081**

**Matches** : 15/92 fragment ions using 32 most intense peaks

| # | b               | b <sup>++</sup> | b <sup>*</sup> | b <sup>*++</sup> | b <sup>0</sup>  | b <sup>0++</sup> | Seq. | y               | y <sup>++</sup> | y <sup>*</sup> | y <sup>*++</sup> | y <sup>0</sup> | y <sup>0++</sup> | # |
|---|-----------------|-----------------|----------------|------------------|-----------------|------------------|------|-----------------|-----------------|----------------|------------------|----------------|------------------|---|
| 1 | 203.1663        | 102.0868        | 186.1397       | 93.5735          |                 |                  | K    |                 |                 |                |                  |                |                  | 9 |
| 2 | <b>290.1983</b> | 145.6028        | 273.1718       | 137.0895         | <b>272.1878</b> | 136.5975         | S    | <b>688.3373</b> | 344.6723        | 671.3107       | 336.1590         | 670.3267       | 335.6670         | 8 |
| 3 | <b>361.2354</b> | 181.1214        | 344.2089       | <b>172.6081</b>  | 343.2249        | <b>172.1161</b>  | A    | <b>601.3053</b> | 301.1563        | 584.2787       | 292.6430         | 583.2947       | 292.1510         | 7 |
| 4 | 418.2569        | 209.6321        | 401.2303       | 201.1188         | 400.2463        | 200.6268         | G    | <b>530.2687</b> | 265.6377        | 513.2416       | 257.1244         | 512.2576       | 256.6324         | 6 |
| 5 | 475.2784        | 238.1428        | 458.2518       | 229.6295         | 457.2678        | 229.1375         | G    | <b>473.2467</b> | 237.1270        | 456.2201       | <b>228.6137</b>  | 455.2361       | <b>228.1217</b>  | 5 |
| 6 | 532.2998        | 266.6535        | 515.2733       | 258.1403         | 514.2893        | 257.6483         | G    | <b>416.2252</b> | 208.6162        | 399.1987       | 200.1030         | 398.2146       | 199.6110         | 4 |
| 7 | 629.3526        | 315.1799        | 612.3260       | 306.6667         | 611.3420        | 306.1746         | P    | 359.2037        | 180.1055        | 342.1772       | 171.5922         | 341.1932       | 171.1002         | 3 |
| 8 | 716.3846        | 358.6959        | 699.3581       | 350.1827         | <b>698.3741</b> | 349.6907         | S    | <b>262.1510</b> | 131.5791        | 245.1244       | 123.0659         | 244.1404       | 122.5738         | 2 |
| 9 |                 |                 |                |                  |                 |                  | R    | <b>175.1190</b> | 88.0631         | 158.0924       | 79.5498          |                |                  | 1 |

MS/MS Fragmentation of **KAAGQDMR**Found in **P82970**, High mobility group nucleosome-binding domain-containing protein 5 OS=Homo sapiens GN=HMGN5 PE=1 SV=1

Match to Query 3933: 1010.535248 from(506.274900, 2+) intensity(249056.6719)

216

Title: File1326 Spectrum3692 scans: 4072

Data file I:\2013-9-13-Hela-Prometh-Fr6\ZW.mgf

Click mouse within plot area to zoom in by factor of two about that point

Or,   to  Da Label all possible matches  Label matches used for scoring 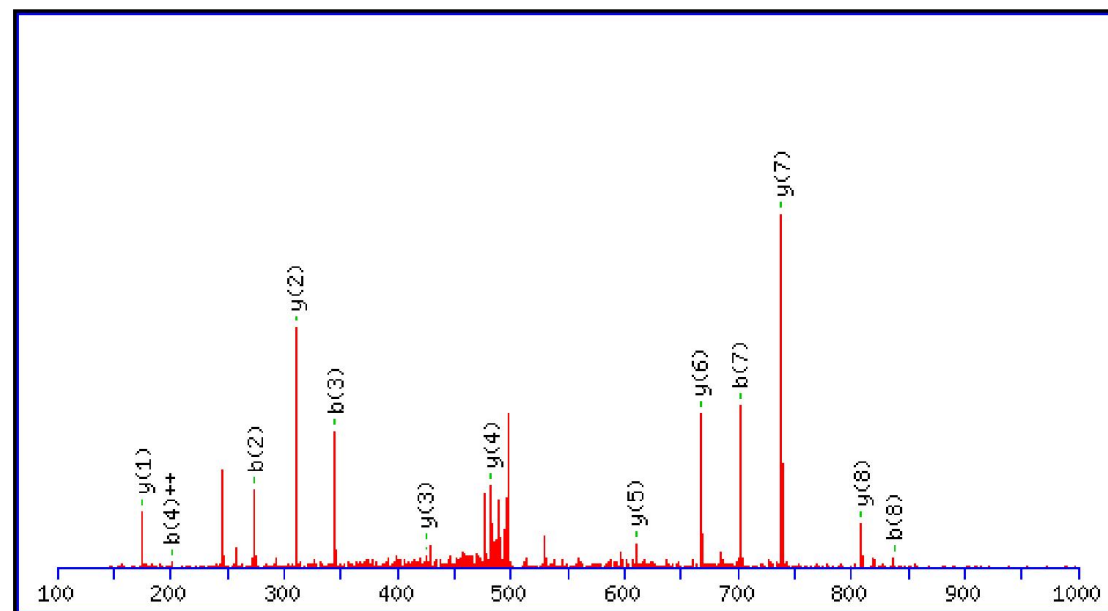**Monoisotopic mass of neutral peptide Mr(calc):** 1010.5360**Fixed modifications:** Carbamidomethyl (C) (apply to specified residues or termini only)**Variable modifications:****K1** : Propionyl-(13CD3)Methyl (K)**M8** : Label:13C(1)2H(3) (M)**Ions Score:** 55 **Expect:** 0.0012**Matches** : 13/80 fragment ions using 27 most intens

| # | b               | b <sup>++</sup> | b*       | b <sup>+++</sup> | b <sup>0</sup> | b <sup>0++</sup> | Seq. | y               | y <sup>++</sup> | y*       | y <sup>+++</sup> | y <sup>0</sup> | y <sup>0++</sup> | # |
|---|-----------------|-----------------|----------|------------------|----------------|------------------|------|-----------------|-----------------|----------|------------------|----------------|------------------|---|
| 1 | 203.1663        | 102.0868        | 186.1397 | 93.5735          |                |                  | K    |                 |                 |          |                  |                |                  | 9 |
| 2 | <b>274.2034</b> | 137.6053        | 257.1769 | 129.0921         |                |                  | A    | <b>809.3843</b> | 405.1958        | 792.3578 | 396.6825         | 791.3737       | 396.1905         | 8 |
| 3 | <b>345.2405</b> | 173.1239        | 328.2140 | 164.6106         |                |                  | A    | <b>738.3472</b> | 369.6772        | 721.3206 | 361.1640         | 720.3366       | 360.6719         | 7 |
| 4 | 402.2620        | <b>201.6346</b> | 385.2354 | 193.4214         |                |                  | G    | <b>667.3101</b> | 334.1587        | 650.2835 | 325.6454         | 649.2995       | 325.1534         | 6 |
| 5 | 530.3206        | 265.6639        | 513.2940 | 257.1506         |                |                  | Q    | <b>610.2886</b> | 305.6479        | 593.2621 | 297.1347         | 592.2780       | 296.6427         | 5 |
| 6 | 587.3420        | 294.1746        | 570.3155 | 285.6614         |                |                  | G    | <b>482.2300</b> | 241.6187        | 465.2035 | 233.1054         | 464.2195       | 232.6134         | 4 |
| 7 | <b>702.3690</b> | 351.6881        | 685.3424 | 343.1748         | 684.3584       | 342.6828         | D    | <b>425.2086</b> | 213.1079        | 408.1820 | 204.5946         | 407.1980       | 204.1026         | 3 |
| 8 | <b>837.4316</b> | 419.2195        | 820.4051 | 410.7062         | 819.4211       | 410.2142         | M    | <b>310.1816</b> | 155.5944        | 293.1551 | 147.0812         |                |                  | 2 |
| 9 |                 |                 |          |                  |                |                  | R    | <b>175.1190</b> | 88.0631         | 158.0924 | 79.5498          |                |                  | 1 |



Found in **Q7L2J0**, 7SK snRNA methylphosphate capping enzyme OS=Homo sapiens GN=MEPCE PE=1 SV=1

Match to Query 6867: 1189.629368 from(595.821960, 2+) intensity(22659.0156)

Title: File1326 Spectrum4117 scans: 4514

Data file I:\2013-9-13-Hela-Prometh-Fr6-ZW.mgf

Click mouse within plot area to zoom in by factor of two about that point

Or,   to  Da Label all possible matches  Label matches used for scoring 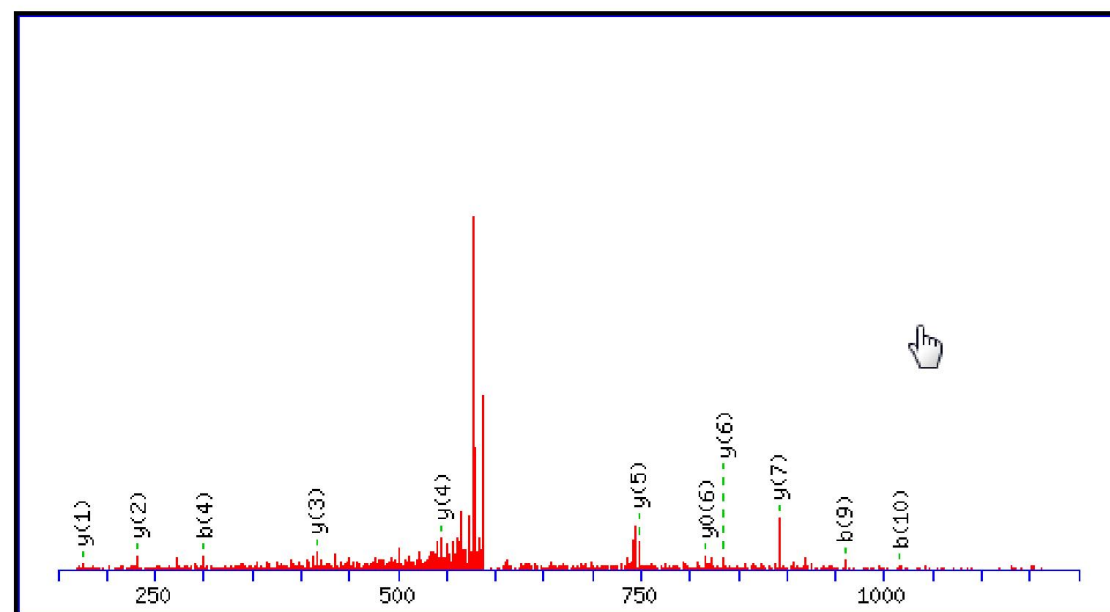**Monoisotopic mass of neutral peptide Mr(calc):** 1189.6324**Fixed modifications:** Carbamidomethyl (C) (apply to specified residues or termini only)**Variable modifications:****K7** : Propionyl-(13CD3)Methyl (K)**K9** : Propionyl (K)**Ions Score:** 30 **Expect:** 0.58**Matches** : 11/98 fragment ions using 40 most intense peaks

| #  | b                | b <sup>++</sup> | b*       | b <sup>+++</sup> | b <sup>0</sup> | b <sup>0++</sup> | Seq. | y               | y <sup>++</sup> | y*        | y <sup>+++</sup> | y <sup>0</sup>  | y <sup>0++</sup> | #  |
|----|------------------|-----------------|----------|------------------|----------------|------------------|------|-----------------|-----------------|-----------|------------------|-----------------|------------------|----|
| 1  | 58.0287          | 29.5180         |          |                  |                |                  | G    |                 |                 |           |                  |                 |                  | 11 |
| 2  | 115.0502         | 58.0287         |          |                  |                |                  | G    | 1183.6182       | 567.3127        | 1116.5916 | 558.7995         | 1115.6076       | 558.3075         | 10 |
| 3  | 172.0717         | 86.5395         |          |                  |                |                  | G    | 1076.5967       | 538.8020        | 1059.5702 | 530.2887         | 1058.5862       | 529.7967         | 9  |
| 4  | <b>300.1302</b>  | 150.5688        | 283.1037 | 142.0555         |                |                  | Q    | 1019.5753       | 510.2913        | 1002.5487 | 501.7780         | 1001.5647       | 501.2860         | 8  |
| 5  | 357.1517         | 179.0795        | 340.1252 | 170.5662         |                |                  | G    | <b>891.5167</b> | 446.2620        | 874.4901  | 437.7487         | 873.5061        | 437.2567         | 7  |
| 6  | 444.1837         | 222.5955        | 427.1572 | 214.0822         | 426.1732       | 213.5902         | S    | <b>834.4952</b> | 417.7513        | 817.4687  | 409.2380         | <b>816.4847</b> | 408.7460         | 6  |
| 7  | 646.3428         | 323.6750        | 629.3162 | 315.1617         | 628.3322       | 314.6697         | K    | <b>747.4632</b> | 374.2352        | 730.4367  | 365.7220         | 729.4526        | 365.2300         | 5  |
| 8  | 775.3853         | 388.1963        | 758.3588 | 379.6830         | 757.3748       | 379.1910         | E    | <b>545.3042</b> | 273.1557        | 528.2776  | 264.6425         | 527.2936        | 264.1504         | 4  |
| 9  | <b>959.5065</b>  | 480.2569        | 942.4800 | 471.7436         | 941.4960       | 471.2516         | K    | <b>416.2616</b> | 208.6344        | 399.2350  | 200.1212         |                 |                  | 3  |
| 10 | <b>1016.5280</b> | 508.7676        | 999.5014 | 500.2544         | 998.5174       | 499.7623         | G    | <b>232.1404</b> | 116.5738        | 215.1139  | 108.0606         |                 |                  | 2  |
| 11 |                  |                 |          |                  |                |                  | R    | <b>175.1190</b> | 88.0631         | 158.0924  | 79.5498          |                 |                  | 1  |

Match to Query 3854: 1106.582868 from(554.298710, 2+) intensity(186624.3281)  
 Title: File1261 Spectrum4076 scans: 4945  
 Data file I:\2013-9-5-Hela-Prometh-Fr5-ZW.mgf

Click mouse within plot area to zoom in by factor of two about that point

Or,   to  Da

Label all possible matches  Label matches used for scoring

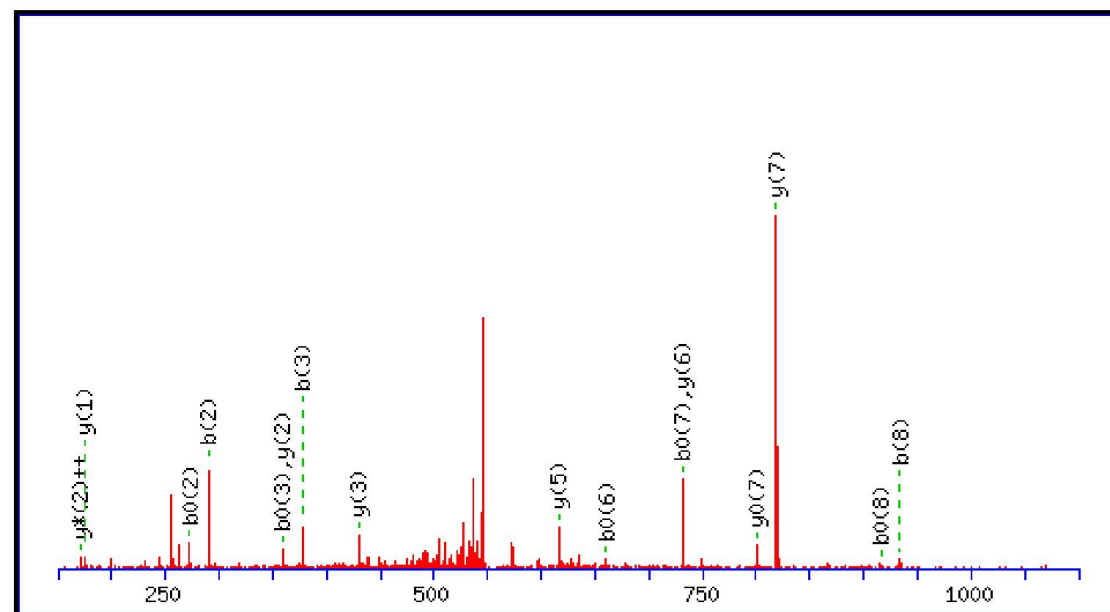

**Monoisotopic mass of neutral peptide Mr(calc):** 1106.5840

**Fixed modifications:** Carbamidomethyl (C) (apply to specified residues or termini only)

**Variable modifications:**

**K2** : Propionyl-(13CD3)Methyl (K)

**K8** : Propionyl (K)

**Ions Score:** 35 **Expect:** 0.18

**Matches** : 16/88 fragment ions using 30 most intense peaks

| # | b               | b <sup>++</sup> | b <sup>*</sup> | b <sup>+++</sup> | b <sup>0</sup>  | b <sup>0++</sup> | Seq. | y               | y <sup>++</sup> | y <sup>*</sup> | y <sup>+++</sup> | y <sup>0</sup>  | y <sup>0++</sup> | # |
|---|-----------------|-----------------|----------------|------------------|-----------------|------------------|------|-----------------|-----------------|----------------|------------------|-----------------|------------------|---|
| 1 | 88.0393         | 44.5233         |                |                  | 70.0287         | 35.5180          | S    |                 |                 |                |                  |                 |                  | 9 |
| 2 | <b>290.1983</b> | 145.6028        | 273.1718       | 137.0895         | <b>272.1878</b> | 136.5975         | K    | 1020.5593       | 510.7833        | 1003.5327      | 502.2700         | 1002.5487       | 501.7780         | 8 |
| 3 | <b>377.2303</b> | 189.1188        | 360.2038       | 180.6055         | <b>359.2198</b> | 180.1135         | S    | <b>818.4003</b> | 409.7038        | 801.3737       | 401.1905         | <b>800.3897</b> | 400.6985         | 7 |
| 4 | 492.2573        | 246.6323        | 475.2307       | 238.1190         | 474.2467        | 237.6270         | D    | <b>731.3682</b> | 366.1878        | 714.3417       | 357.6745         | 713.3577        | 357.1825         | 6 |
| 5 | 549.2788        | 275.1430        | 532.2522       | 266.6297         | 531.2682        | 266.1377         | G    | <b>616.3413</b> | 308.6743        | 599.3148       | 300.1610         | 598.3307        | 299.6690         | 5 |
| 6 | 678.3213        | 339.6643        | 661.2948       | 331.1510         | <b>660.3108</b> | 330.6590         | B    | 559.3198        | 280.1686        | 542.2933       | 271.6503         | 541.3093        | 271.1583         | 4 |
| 7 | 749.3585        | 375.1829        | 732.3319       | 366.6696         | <b>731.3479</b> | 366.1776         | A    | <b>430.2772</b> | 215.6423        | 413.2507       | 207.1290         |                 |                  | 3 |
| 8 | <b>933.4796</b> | 467.2435        | 916.4531       | 458.7302         | <b>915.4691</b> | 458.2382         | K    | <b>359.2401</b> | 180.1237        | 342.2136       | <b>171.6104</b>  |                 |                  | 2 |
| 9 |                 |                 |                |                  |                 |                  | R    | <b>175.1190</b> | 88.0631         | 158.0924       | 79.5498          |                 |                  | 1 |

Match to Query 5547: 1240.629488 from(621.322020, 2+) intensity(125152.1172)

Title: File1261 Spectrum6531 scans: 7645

Data file I:\2013-9-5-Hela-Prometh-Fr5-ZW.mgf

Click mouse within plot area to zoom in by factor of two about that point

Or,   to  Da Label all possible matches  Label matches used for scoring 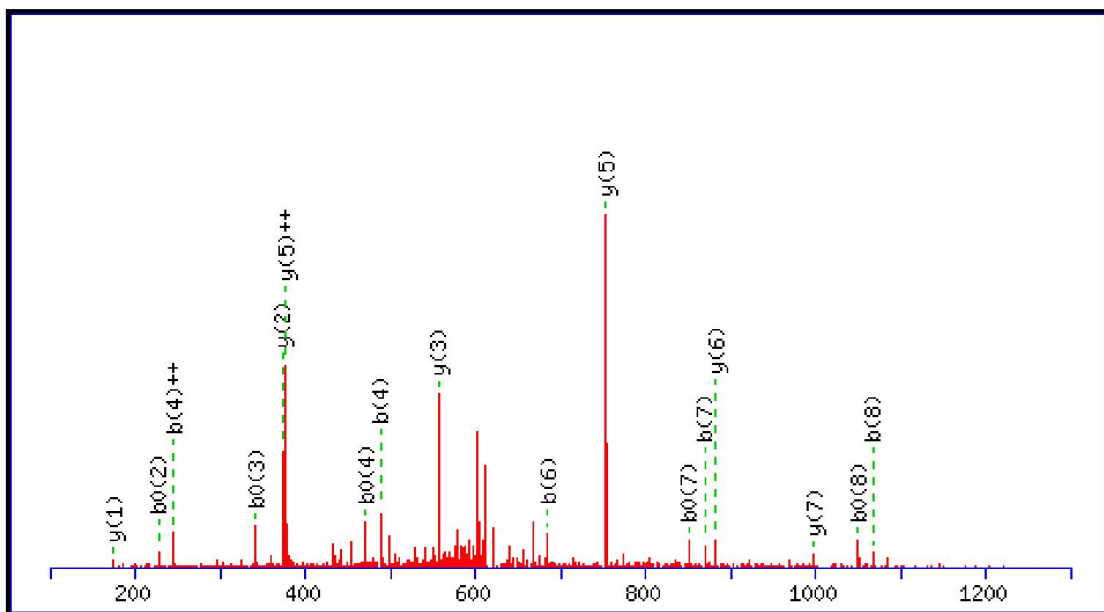Monoisotopic mass of neutral peptide  $M_r(\text{calc})$ : 1240.6299

Fixed modifications: Carbamidomethyl (C) (apply to specified residues or termini only)

Variable modifications:

**K7** : Propionyl (K)**K8** : Propionyl-Methylation (K)

Ions Score: 33 Expect: 0.2

Matches : 18/74 fragment ions using 33 most intense

| # | b                | b <sup>++</sup> | b <sup>*</sup> | b <sup>+++</sup> | b <sup>0</sup>   | b <sup>0++</sup> | Seq. | y               | y <sup>++</sup> | y <sup>*</sup> | y <sup>+++</sup> | y <sup>0</sup> | y <sup>0++</sup> | # |
|---|------------------|-----------------|----------------|------------------|------------------|------------------|------|-----------------|-----------------|----------------|------------------|----------------|------------------|---|
| 1 | 130.0499         | 65.5286         |                |                  | 112.0393         | 56.5233          | E    |                 |                 |                |                  |                |                  | 9 |
| 2 | <b>245.0768</b>  | 123.0420        |                |                  | <b>227.0662</b>  | 114.0368         | D    | 1112.5946       | 556.8009        | 1095.5681      | 548.2877         | 1094.5841      | 547.7957         | 8 |
| 3 | 360.1038         | 180.5555        |                |                  | <b>342.0932</b>  | 171.5502         | D    | <b>997.5677</b> | 499.2875        | 980.5411       | 490.7742         | 979.5571       | 490.2822         | 7 |
| 4 | <b>489.1463</b>  | <b>245.0768</b> |                |                  | <b>471.1358</b>  | 236.0715         | E    | <b>882.5407</b> | 441.7740        | 865.5142       | 433.2607         | 864.5302       | 432.7687         | 6 |
| 5 | 586.1991         | 293.6032        |                |                  | 568.1885         | 284.5979         | P    | <b>753.4981</b> | <b>377.2527</b> | 736.4716       | 368.7394         |                |                  | 5 |
| 6 | <b>685.2675</b>  | 343.1374        |                |                  | 667.2570         | 334.1321         | V    | 656.4454        | 328.7263        | 639.4188       | 320.2130         |                |                  | 4 |
| 7 | <b>869.3887</b>  | 435.1980        | 852.3622       | 426.6847         | <b>851.3781</b>  | 426.1927         | K    | <b>557.3770</b> | 279.1921        | 540.3504       | 270.6788         |                |                  | 3 |
| 8 | <b>1067.5255</b> | 534.2664        | 1050.4990      | 525.7531         | <b>1049.5150</b> | 525.2611         | K    | <b>373.2558</b> | 187.1315        | 356.2292       | 178.6183         |                |                  | 2 |
| 9 |                  |                 |                |                  |                  |                  | R    | <b>175.1190</b> | 88.0631         | 158.0924       | 79.5498          |                |                  | 1 |

MS/MS Fragmentation of **KGGPDDR**Found in **Q15056**, Eukaryotic translation initiation factor 4H OS=Homo sapiens GN=EIF4H PE=1 SV=5

Match to Query 840: 813.398348 from(407.706450, 2+) intensity(54687.7305)

Title: File1308 Spectrum1897 scans: 2261

Data file I:\2013-9-12-Hela-Prometh-Fr4-ZW.mgf

Click mouse within plot area to zoom in by factor of two about that point

Or,   to  Da Label all possible matches  Label matches used for scoring 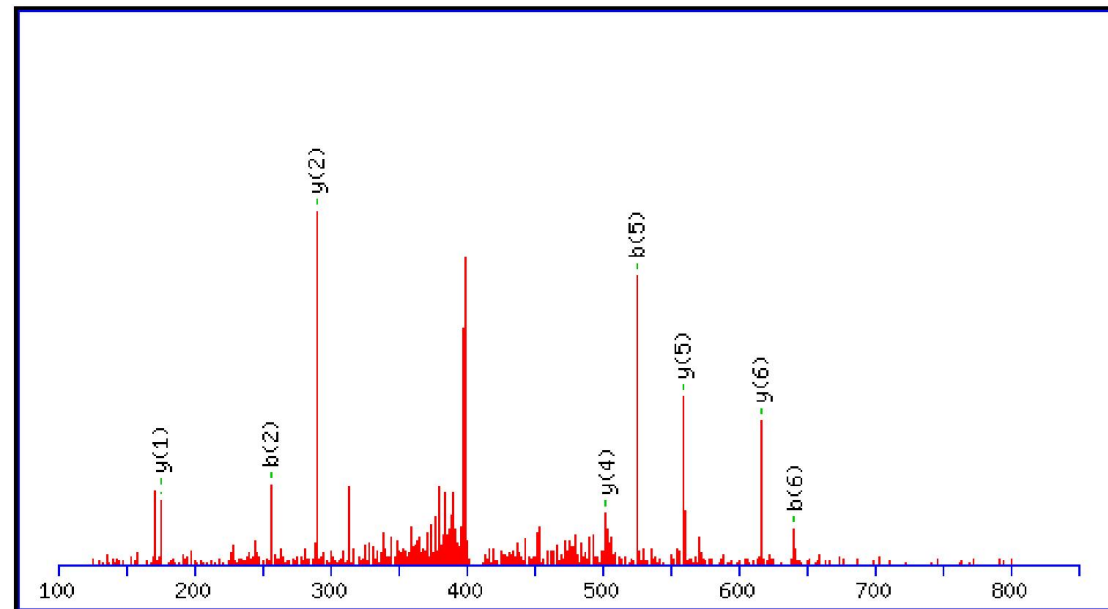**Monoisotopic mass of neutral peptide Mr(calc):** 813.3981**Fixed modifications:** Carbamidomethyl (C) (apply to specified residues or termini only)**Variable modifications:****K1** : Propionyl-Methylation (K)**Ions Score:** 40 **Expect:** 0.013**Matches** : 8/62 fragment ions using 14 most intense

| # | b               | b <sup>++</sup> | b <sup>*</sup> | b <sup>*++</sup> | b <sup>0</sup> | b <sup>0++</sup> | Seq. | y               | y <sup>++</sup> | y <sup>*</sup> | y <sup>*++</sup> | y <sup>0</sup> | y <sup>0++</sup> | # |
|---|-----------------|-----------------|----------------|------------------|----------------|------------------|------|-----------------|-----------------|----------------|------------------|----------------|------------------|---|
| 1 | 199.1441        | 100.0757        | 182.1176       | 91.5624          |                |                  | K    |                 |                 |                |                  |                |                  | 7 |
| 2 | <b>256.1656</b> | 128.5864        | 239.1390       | 120.0731         |                |                  | G    | <b>616.2685</b> | 308.6379        | 599.2420       | 300.1246         | 598.2580       | 299.6326         | 6 |
| 3 | 313.1870        | 157.0972        | 296.1605       | 148.5839         |                |                  | G    | <b>559.2471</b> | 280.1272        | 542.2205       | 271.6139         | 541.2365       | 271.1219         | 5 |
| 4 | 410.2398        | 205.6235        | 393.2132       | 197.1103         |                |                  | P    | <b>502.2256</b> | 251.6164        | 485.1991       | 243.1032         | 484.2150       | 242.6112         | 4 |
| 5 | <b>525.2667</b> | 263.1370        | 508.2402       | 254.6237         | 507.2562       | 254.1317         | D    | 405.1728        | 203.0901        | 388.1463       | 194.5768         | 387.1623       | 194.0848         | 3 |
| 6 | <b>640.2937</b> | 320.6505        | 623.2671       | 312.1372         | 622.2831       | 311.6452         | D    | <b>290.1459</b> | 145.5766        | 273.1193       | 137.0633         | 272.1353       | 136.5713         | 2 |
| 7 |                 |                 |                |                  |                |                  | R    | <b>175.1190</b> | 88.0631         | 158.0924       | 79.5498          |                |                  | 1 |

Found in **Q13442**, 28 kDa heat- and acid-stable phosphoprotein OS=Homo sapiens GN=PDAP1 PE=1 SV=1

Match to Query 2361: 947.519148 from(474.766850, 2+) intensity(23489.1426)

Title: File1308 Spectrum3039 scans: 3502

Data file I:\2013-9-12-Hela-Prometh-Fr4-ZW.mgf

Click mouse within plot area to zoom in by factor of two about that point

Or,   to  Da Label all possible matches  Label matches used for scoring 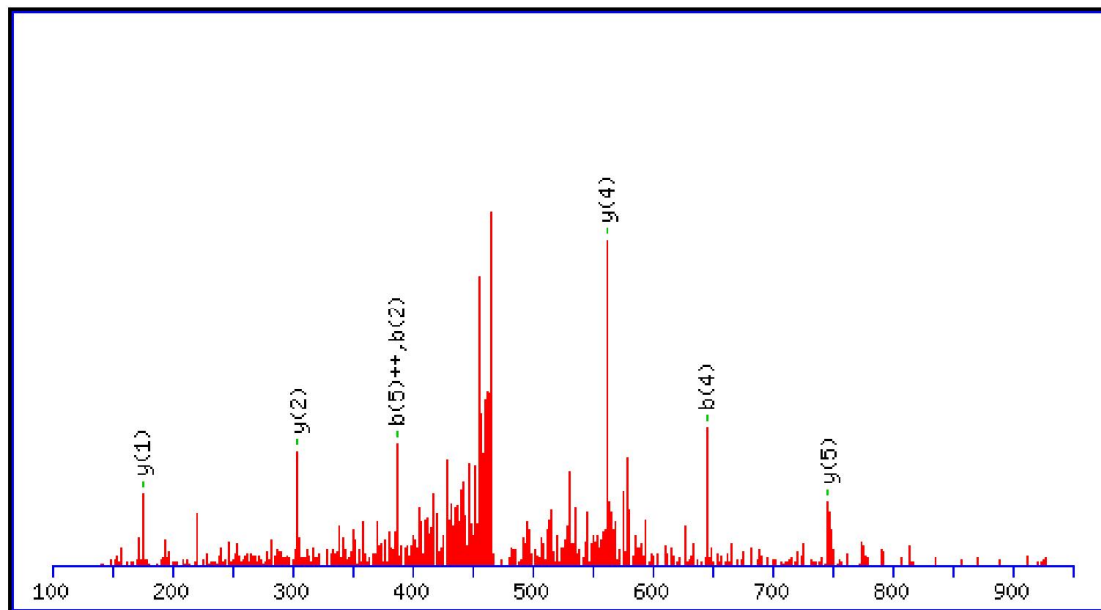**Monoisotopic mass of neutral peptide Mr(calc):** 947.5196**Fixed modifications:** Carbamidomethyl (C) (apply to specified residues or termini only)**Variable modifications:****K1** : Propionyl-(13CD3)Methyl (K)**K2** : Propionyl (K)**Ions Score:** 36 **Expect:** 0.12**Matches** : 7/54 fragment ions using 8 most

| # | b               | b <sup>+</sup>  | b*       | b <sup>++</sup> | b <sup>0</sup> | b <sup>0++</sup> | Seq. | y               | y <sup>++</sup> | y*       | y <sup>++</sup> | y <sup>0</sup> | y <sup>0++</sup> | # |
|---|-----------------|-----------------|----------|-----------------|----------------|------------------|------|-----------------|-----------------|----------|-----------------|----------------|------------------|---|
| 1 | 203.1663        | 102.0868        | 186.1397 | 93.5735         |                |                  | K    |                 |                 |          |                 |                |                  | 6 |
| 2 | <b>387.2875</b> | 194.1474        | 370.2609 | 185.6341        |                |                  | K    | <b>746.3679</b> | 373.6876        | 729.3414 | 365.1743        | 728.3573       | 364.6823         | 5 |
| 3 | 516.3301        | 258.6687        | 499.3035 | 250.1554        | 498.3195       | 249.6634         | E    | <b>562.2467</b> | 281.6270        | 545.2202 | 273.1137        | 544.2362       | 272.6217         | 4 |
| 4 | <b>645.3727</b> | 323.1900        | 628.3461 | 314.6767        | 627.3621       | 314.1847         | E    | 433.2041        | 217.1057        | 416.1776 | 208.5924        | 415.1936       | 208.1004         | 3 |
| 5 | 774.4152        | <b>387.7113</b> | 757.3887 | 379.1980        | 756.4047       | 378.7060         | E    | <b>304.1615</b> | 152.5844        | 287.1350 | 144.0711        | 286.1510       | 143.5791         | 2 |
| 6 |                 |                 |          |                 |                |                  | R    | <b>175.1190</b> | 88.0631         | 158.0924 | 79.5498         |                |                  | 1 |

Found in **E7ES08**, High mobility group protein B3 (Fragment) OS=Homo sapiens GN=HMGB3 PE=2 SV=1

Match to Query 8743: 1517.662808 from(759.838680, 2+) intensity(384799.4375)

Title: File1308 Spectrum6538 scans: 7421

Data file I:\2013-9-12-Hela-Prometh-Fr4-ZW.mgf

Click mouse within plot area to zoom in by factor of two about that point

Or,   to  Da Label all possible matches  Label matches used for scoring 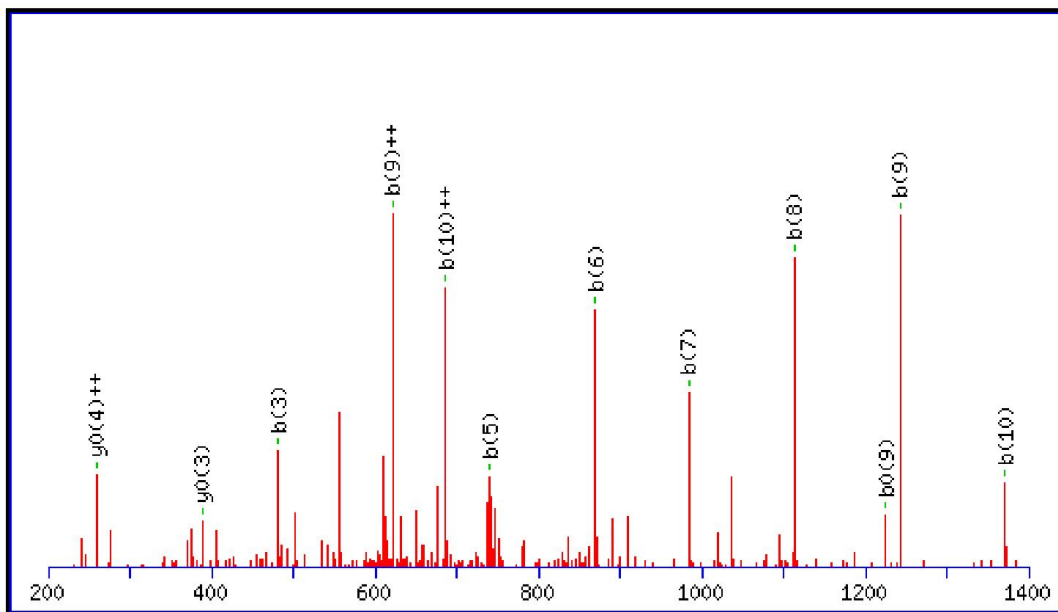**Monoisotopic mass of neutral peptide Mr(calc):** 1517.6620**Fixed modifications:** Carbamidomethyl (C) (apply to specified residues or termini only)**Variable modifications:****K1** : Propionyl (K)**K2** : Propionyl-Methylation (K)**Ions Score:** 60 **Expect:** 8.1e-005**Matches** : 13/96 fragment ions using 12 most intense peaks

| #  | b                | b <sup>++</sup> | b*        | b <sup>+++</sup> | b <sup>0</sup>   | b <sup>0++</sup> | Seq. | y         | y <sup>++</sup> | y*        | y <sup>+++</sup> | y <sup>0</sup>  | y <sup>0++</sup> | #  |
|----|------------------|-----------------|-----------|------------------|------------------|------------------|------|-----------|-----------------|-----------|------------------|-----------------|------------------|----|
| 1  | 185.1285         | 93.6879         | 168.1019  | 84.5546          |                  |                  | K    |           |                 |           |                  |                 |                  | 11 |
| 2  | 383.2653         | 192.1363        | 366.2387  | 183.6230         |                  |                  | K    | 1334.5482 | 667.7777        | 1317.5216 | 659.2645         | 1316.5376       | 658.7724         | 10 |
| 3  | <b>482.3337</b>  | 241.6705        | 465.3071  | 233.1572         |                  |                  | V    | 1136.4113 | 568.7093        |           |                  | 1118.4008       | 559.7040         | 9  |
| 4  | 611.3763         | 306.1918        | 594.3497  | 297.6785         | 593.3657         | 297.1865         | E    | 1037.3429 | 519.1751        |           |                  | 1019.3324       | 510.1698         | 8  |
| 5  | <b>740.4189</b>  | 370.7131        | 723.3923  | 362.1998         | 722.4083         | 361.7078         | E    | 908.3003  | 454.6538        |           |                  | 890.2898        | 445.6485         | 7  |
| 6  | <b>869.4615</b>  | 435.2344        | 852.4349  | 426.7211         | 851.4509         | 426.2291         | E    | 779.2577  | 390.1325        |           |                  | 761.2472        | 381.1272         | 6  |
| 7  | <b>984.4884</b>  | 492.7478        | 967.4619  | 484.2346         | 966.4779         | 483.7426         | D    | 650.2152  | 325.6112        |           |                  | 632.2046        | 316.6059         | 5  |
| 8  | <b>1113.5310</b> | 557.2691        | 1096.5045 | 548.7559         | 1095.5204        | 548.2639         | E    | 535.1882  | 268.0977        |           |                  | 517.1776        | <b>259.0925</b>  | 4  |
| 9  | <b>1242.5736</b> | <b>621.7904</b> | 1225.5471 | 613.2772         | <b>1224.5630</b> | 612.7852         | E    | 406.1456  | 203.5764        |           |                  | <b>388.1351</b> | 194.5712         | 3  |
| 10 | <b>1371.6162</b> | <b>686.3117</b> | 1354.5896 | 677.7985         | 1353.6056        | 677.3065         | E    | 277.1030  | 139.0552        |           |                  | <b>259.0925</b> | 130.0499         | 2  |
| 11 |                  |                 |           |                  |                  |                  | E    | 148.0604  | 74.5339         |           |                  | 130.0499        | 65.5286          | 1  |

Match to Query 4297: 1089.530368 from(545.772460,2+) intensity(42237.9844)

Title: File1308 Spectrum3963 scans: 4521

Data file I:\2013-9-12-Hela-Prometh-Fr4-ZW.mgf

Click mouse within plot area to zoom in by factor of two about that point

Or,   to  Da Label all possible matches  Label matches used for scoring 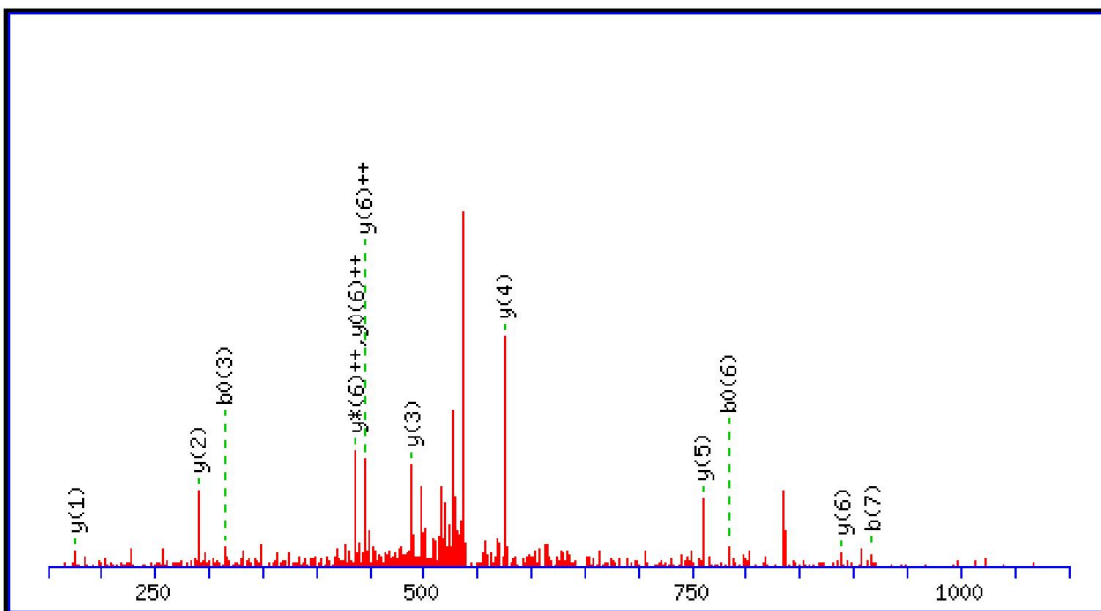**Monoisotopic mass of neutral peptide Mr(calc):** 1089.5302**Fixed modifications:** Carbamidomethyl (C) (apply to specified residues or termini only)**Variable modifications:****K4** : Propionyl (K)**K6** : Propionyl-Methylation (K)**Ions Score: 24 Expect: 1.3****Matches :** 12/76 fragment ions using 28 most i

| # | b               | b <sup>++</sup> | b <sup>+</sup> | b <sup>+++</sup> | b <sup>0</sup>  | b <sup>0++</sup> | Seq. | y               | y <sup>++</sup> | y <sup>+</sup> | y <sup>+++</sup> | y <sup>0</sup> | y <sup>0++</sup> | # |
|---|-----------------|-----------------|----------------|------------------|-----------------|------------------|------|-----------------|-----------------|----------------|------------------|----------------|------------------|---|
| 1 | 88.0393         | 44.5233         |                |                  | 70.0287         | 35.5180          | S    |                 |                 |                |                  |                |                  | 8 |
| 2 | 203.0662        | 102.0368        |                |                  | 185.0557        | 93.0315          | D    | 1003.5055       | 502.2564        | 986.4789       | 493.7431         | 985.4949       | 493.2511         | 7 |
| 3 | 332.1088        | 166.5581        |                |                  | 314.0983        | 157.5528         | E    | <b>888.4785</b> | <b>444.7429</b> | 871.4520       | <b>436.2296</b>  | 870.4680       | <b>435.7376</b>  | 6 |
| 4 | 516.2300        | 258.6186        | 499.2035       | 250.1054         | 498.2195        | 249.6134         | K    | <b>759.4359</b> | 380.2216        | 742.4094       | 371.7083         | 741.4254       | 371.2163         | 5 |
| 5 | 603.2620        | 302.1347        | 586.2355       | 293.6214         | 585.2515        | 293.1294         | S    | <b>575.3148</b> | 288.1610        | 558.2882       | 279.6477         | 557.3042       | 279.1557         | 4 |
| 6 | 801.3989        | 401.2031        | 784.3723       | 392.6898         | <b>783.3883</b> | 392.1978         | K    | <b>488.2827</b> | 244.6450        | 471.2562       | 236.1317         | 470.2722       | 235.6397         | 3 |
| 7 | <b>916.4258</b> | 458.7165        | 899.3993       | 450.2033         | 898.4153        | 449.7113         | D    | <b>290.1459</b> | 145.5766        | 273.1193       | 137.0633         | 272.1353       | 136.5713         | 2 |
| 8 |                 |                 |                |                  |                 |                  | R    | <b>175.1190</b> | 88.0631         | 158.0924       | 79.5498          |                |                  | 1 |

Found in **E7EX17**, Eukaryotic translation initiation factor 4B OS=Homo sapiens GN=EIF4B PE=2 SV=1

Match to Query 2708: 975.462568 from(488.738560, 2+) intensity(328427.3438)

Title: File1308 Spectrum1574 scans: 1916

Data file I:\2013-9-12-Hela-Prometh-Fr4-ZW.mgf

Click mouse within plot area to zoom in by factor of two about that point

Or,   to  Da Label all possible matches  Label matches used for scoring 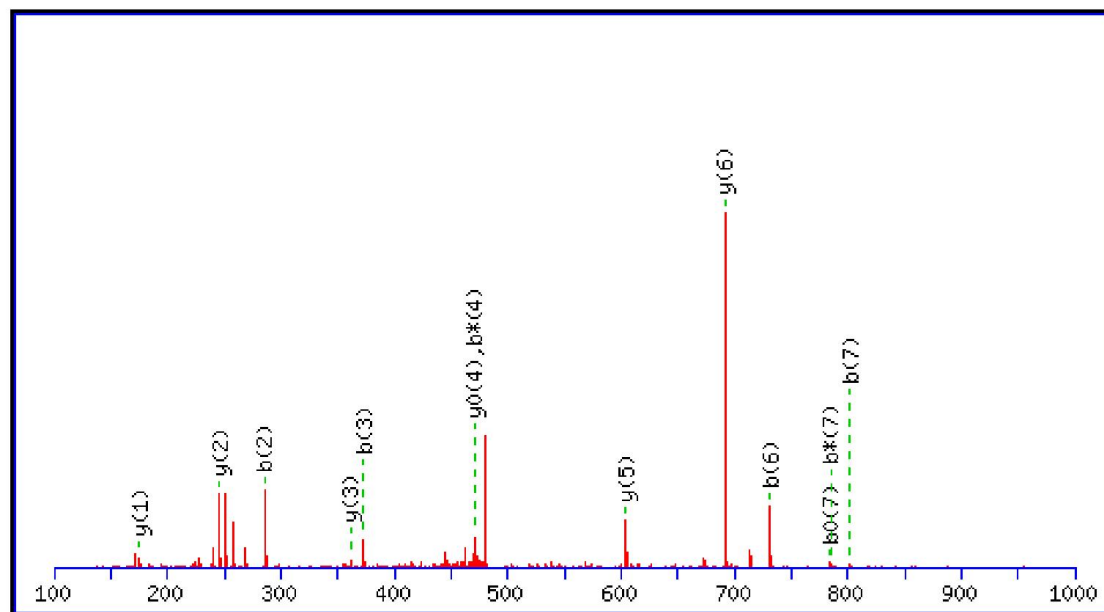**Monoisotopic mass of neutral peptide Mr(calc):** 975.4621**Fixed modifications:** Carbamidomethyl (C) (apply to specified residues or termini only)**Variable modifications:****K2** : Propionyl-Methylation (K)**Ions Score:** 29 **Expect:** 0.23**Matches** : 13/78 fragment ions using 25 most i

| # | b               | b <sup>++</sup> | b*              | b <sup>+++</sup> | b <sup>0</sup>  | b <sup>0++</sup> | Seq. | y               | y <sup>++</sup> | y*       | y <sup>+++</sup> | y <sup>0</sup>  | y <sup>0++</sup> | # |
|---|-----------------|-----------------|-----------------|------------------|-----------------|------------------|------|-----------------|-----------------|----------|------------------|-----------------|------------------|---|
| 1 | 88.0393         | 44.5233         |                 |                  | 70.0287         | 35.5180          | S    |                 |                 |          |                  |                 |                  | 8 |
| 2 | <b>286.1761</b> | 143.5917        | 269.1496        | 135.0784         | 268.1656        | 134.5864         | K    | 889.4374        | 445.2223        | 872.4108 | 436.7091         | 871.4268        | 436.2170         | 7 |
| 3 | <b>373.2082</b> | 187.1077        | 356.1816        | 178.5944         | 355.1976        | 178.1024         | S    | <b>691.3006</b> | 346.1539        | 674.2740 | 337.6406         | 673.2900        | 337.1486         | 6 |
| 4 | 488.2351        | 244.6212        | <b>471.2086</b> | 236.1079         | 470.2245        | 235.6159         | D    | <b>604.2685</b> | 302.6379        | 587.2420 | 294.1246         | 586.2580        | 293.6326         | 5 |
| 5 | 616.2937        | 308.6505        | 599.2671        | 300.1372         | 598.2831        | 299.6452         | Q    | 489.2416        | 245.1244        | 472.2150 | 236.6112         | <b>471.2310</b> | 236.1191         | 4 |
| 6 | <b>731.3206</b> | 366.1640        | 714.2941        | 357.6507         | 713.3101        | 357.1587         | D    | <b>361.1830</b> | 181.0951        | 344.1565 | 172.5819         | 343.1724        | 172.0899         | 3 |
| 7 | <b>802.3577</b> | 401.6825        | <b>785.3312</b> | 393.1692         | <b>784.3472</b> | 392.6772         | A    | <b>246.1561</b> | 123.5817        | 229.1295 | 115.0684         |                 |                  | 2 |
| 8 |                 |                 |                 |                  |                 |                  | R    | <b>175.1190</b> | 88.0631         | 158.0924 | 79.5498          |                 |                  | 1 |



MS/MS Fragmentation of **PSVLGPLKR**

Found in **Q7Z309**, Protein FAM122B OS=Homo sapiens GN=FAM122B PE=1 SV=2

Match to Query 3569: 1035.645608 from(518.830080, 2+) intensity(37804.5039)

Title: File1308 Spectrum11446 scans: 12589

Data file I:\2013-9-12-Hela-Prometh-Fr4-ZW.mgf

Click mouse within plot area to zoom in by factor of two about that point

Or,   to  Da

Label all possible matches  Label matches used for scoring

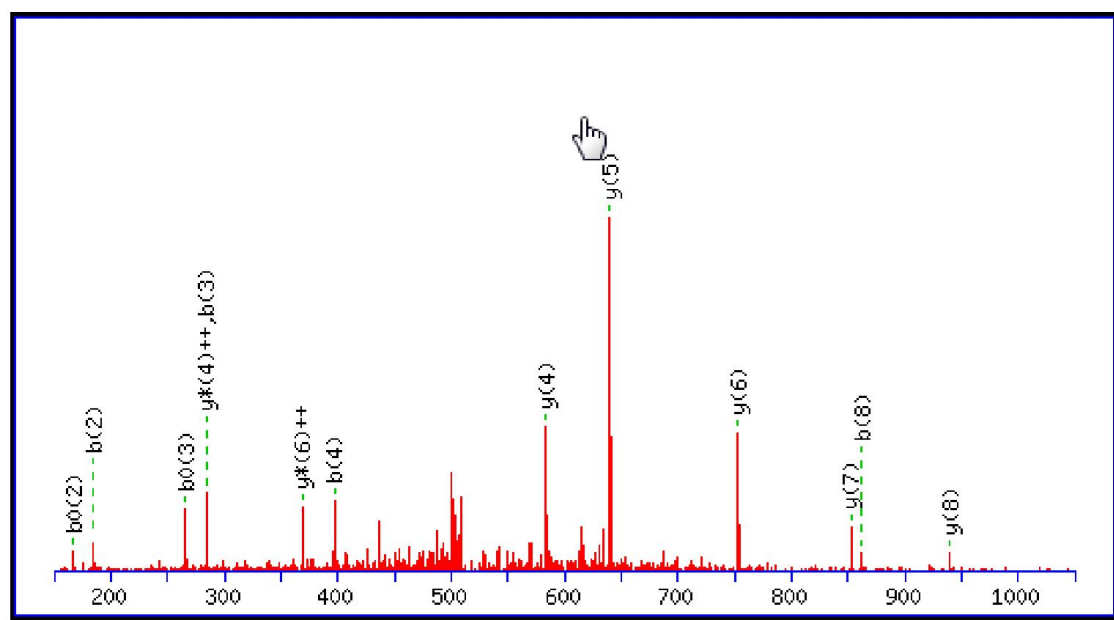

**Monoisotopic mass of neutral peptide Mr(calc):** 1035.6441

**Fixed modifications:** Carbamidomethyl (C) (apply to specified residues or termini only)

**Variable modifications:**

**K8** : Propionyl-Methylation (K)

**Ions Score:** 42 **Expect:** 0.018

**Matches :** 13/66 fragment ions using 18 most intens

| # | b               | b <sup>++</sup> | b*       | b <sup>+++</sup> | b <sup>0</sup>  | b <sup>0++</sup> | Seq. | y               | y <sup>++</sup> | y*       | y <sup>+++</sup> | y <sup>0</sup> | y <sup>0++</sup> | # |
|---|-----------------|-----------------|----------|------------------|-----------------|------------------|------|-----------------|-----------------|----------|------------------|----------------|------------------|---|
| 1 | 98.0600         | 49.5337         |          |                  |                 |                  | P    |                 |                 |          |                  |                |                  | 9 |
| 2 | <b>185.0921</b> | 93.0497         |          |                  | 167.0815        | 84.0444          | S    | <b>939.5986</b> | 470.3029        | 922.5720 | 461.7897         | 921.5880       | 461.2976         | 8 |
| 3 | <b>284.1605</b> | 142.5839        |          |                  | <b>266.1499</b> | 133.5786         | V    | <b>852.5666</b> | 426.7869        | 835.5400 | 418.2736         |                |                  | 7 |
| 4 | <b>397.2445</b> | 199.1259        |          |                  | 379.2340        | 190.1206         | L    | <b>753.4981</b> | 377.2527        | 736.4716 | <b>368.7394</b>  |                |                  | 6 |
| 5 | 454.2660        | 227.6366        |          |                  | 436.2554        | 218.6314         | G    | <b>640.4141</b> | 320.7107        | 623.3875 | 312.1974         |                |                  | 5 |
| 6 | 551.3188        | 276.1630        |          |                  | 533.3082        | 267.1577         | P    | <b>583.3926</b> | 292.1999        | 566.3661 | <b>283.6867</b>  |                |                  | 4 |
| 7 | 664.4028        | 332.7051        |          |                  | 646.3923        | 323.6998         | L    | 486.3398        | 243.6736        | 469.3133 | 235.1603         |                |                  | 3 |
| 8 | <b>862.5397</b> | 431.7735        | 845.5131 | 423.2602         | 844.5291        | 422.7682         | K    | 373.2558        | 187.1315        | 356.2292 | 178.6183         |                |                  | 2 |
| 9 |                 |                 |          |                  |                 |                  | R    | 175.1190        | 88.0631         | 158.0924 | 79.5498          |                |                  | 1 |

Match to Query 3187: 1040.512908 from(521.263730, 2+) intensity(72007.9297)

Title: File1329 Spectrum5587 scans: 6048

Data file I:\2013-9-14-Hela-Prometh-Fr3-ZW.mgf

Click mouse within plot area to zoom in by factor of two about that point

Or,   to  Da Label all possible matches  Label matches used for scoring 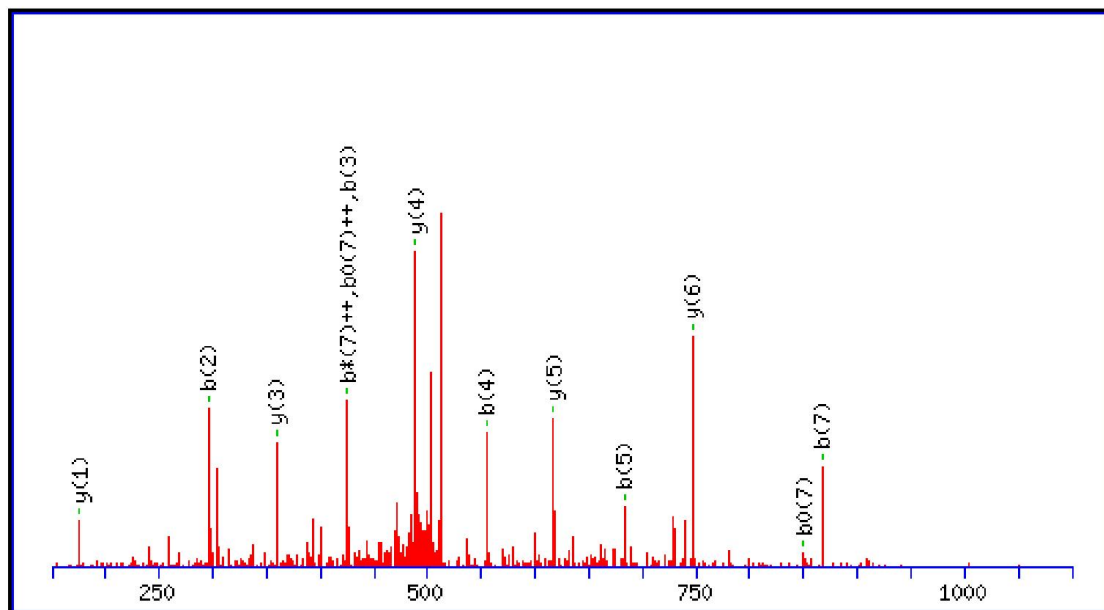**Monoisotopic mass of neutral peptide Mr(calc):** 1040.5138**Fixed modifications:** Carbamidomethyl (C) (apply to specified residues or termini only)**Variable modifications:****K1** : Propionyl-Methylation (K)**Ions Score:** 36 **Expect:** 0.054**Matches** : 13/76 fragment ions using 17 most intense peaks

| # | b               | b <sup>++</sup> | b*       | b <sup>*++</sup> | b <sup>0</sup>  | b <sup>0++</sup> | Seq. | y               | y <sup>++</sup> | y*       | y <sup>*++</sup> | y <sup>0</sup> | y <sup>0++</sup> | # |
|---|-----------------|-----------------|----------|------------------|-----------------|------------------|------|-----------------|-----------------|----------|------------------|----------------|------------------|---|
| 1 | 199.1441        | 100.0757        | 182.1176 | 91.5624          |                 |                  | K    |                 |                 |          |                  |                |                  | 8 |
| 2 | <b>296.1969</b> | 148.6021        | 279.1703 | 140.0888         |                 |                  | P    | 843.3843        | 422.1958        | 826.3577 | 413.6825         | 825.3737       | 413.1905         | 7 |
| 3 | <b>425.2395</b> | 213.1234        | 408.2129 | 204.6101         | 407.2289        | 204.1181         | E    | <b>746.3315</b> | 373.6694        | 729.3050 | 365.1561         | 728.3210       | 364.6641         | 6 |
| 4 | <b>554.2821</b> | 277.6447        | 537.2555 | 269.1314         | 536.2715        | 268.6394         | E    | <b>617.2889</b> | 309.1481        | 600.2624 | 300.6348         | 599.2784       | 300.1428         | 5 |
| 5 | <b>683.3246</b> | 342.1660        | 666.2981 | 333.6527         | 665.3141        | 333.1607         | E    | <b>488.2463</b> | 244.6268        | 471.2198 | 236.1135         | 470.2358       | 235.6215         | 4 |
| 6 | 770.3567        | 385.6820        | 753.3301 | 377.1687         | 752.3461        | 376.6767         | S    | <b>359.2037</b> | 180.1055        | 342.1772 | 171.5922         | 341.1932       | 171.1002         | 3 |
| 7 | <b>867.4094</b> | 434.2084        | 850.3829 | <b>425.6951</b>  | <b>849.3989</b> | <b>425.2031</b>  | P    | 272.1717        | 136.5895        | 255.1452 | 128.0762         |                |                  | 2 |
| 8 |                 |                 |          |                  |                 |                  | R    | <b>175.1190</b> | 88.0631         | 158.0924 | 79.5498          |                |                  | 1 |

Match to Query 11533: 1728.830428 from(865.422490, 2+) intensity(310533.7500)

Title: File1329 Spectrum3428 scans: 3799

Data file I:\2013-9-14-Hela-Prometh-Fr3-ZW.mgf

Click mouse within plot area to zoom in by factor of two about that point

Or,   to  Da Label all possible matches  Label matches used for scoring 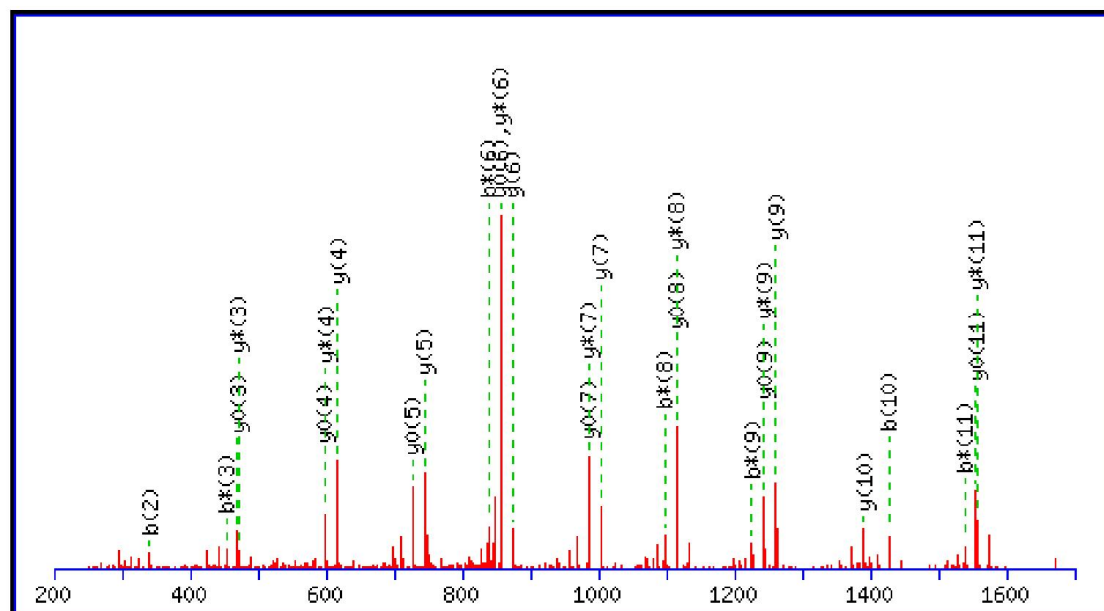**Monoisotopic mass of neutral peptide Mr(calc): 1728.8278****Fixed modifications:** Carbamidomethyl (C) (apply to spec)**Variable modifications:****K2** : Propionyl (K)**K10** : Propionyl (K)**Ions Score: 67 Expect: 8.9e-005****Matches : 36/126 fragment ions using 45 most intense peak:**

| #  | b                | b <sup>++</sup> | b <sup>+</sup>   | b <sup>++</sup> | b <sup>0</sup> | b <sup>0++</sup> | Seq. | y                | y <sup>++</sup> | y <sup>+</sup>   | y <sup>++</sup> | y <sup>0</sup>   | y <sup>0++</sup> | #  |
|----|------------------|-----------------|------------------|-----------------|----------------|------------------|------|------------------|-----------------|------------------|-----------------|------------------|------------------|----|
| 1  | 157.1084         | 79.0578         | 140.0818         | 70.5446         |                |                  | R    |                  |                 |                  |                 |                  |                  | 12 |
| 2  | <b>341.2296</b>  | 171.1184        | 324.2030         | 162.6051        |                |                  | K    | 1573.7340        | 787.3706        | <b>1556.7075</b> | 778.8574        | <b>1555.7235</b> | 778.3654         | 11 |
| 3  | <b>470.2722</b>  | 235.6397        | <b>453.2456</b>  | 227.1264        | 452.2616       | 226.6344         | E    | <b>1389.6128</b> | 695.3101        | 1372.5863        | 686.7968        | 1371.6023        | 686.3048         | 10 |
| 4  | <b>598.3307</b>  | 299.6690        | 581.3042         | 291.1557        | 580.3202       | 290.6637         | Q    | <b>1260.5703</b> | 630.7888        | <b>1243.5437</b> | 622.2755        | <b>1242.5597</b> | 621.7835         | 9  |
| 5  | <b>727.3733</b>  | 364.1903        | 710.3468         | 355.6770        | 709.3628       | 355.1850         | E    | 1132.5117        | 566.7595        | <b>1115.4851</b> | 558.2462        | <b>1114.5011</b> | 557.7542         | 8  |
| 6  | <b>856.4159</b>  | 428.7116        | <b>839.3894</b>  | 420.1983        | 838.4054       | 419.7063         | E    | <b>1003.4691</b> | 502.2382        | <b>986.4425</b>  | 493.7249        | <b>985.4585</b>  | 493.2329         | 7  |
| 7  | <b>985.4585</b>  | 493.2329        | 968.4820         | 484.7196        | 967.4480       | 484.2276         | E    | <b>874.4265</b>  | 437.7169        | <b>857.3999</b>  | 429.2036        | <b>856.4159</b>  | 428.7116         | 6  |
| 8  | <b>1114.5011</b> | 557.7542        | <b>1097.4746</b> | 549.2409        | 1096.4905      | 548.7489         | E    | <b>745.3839</b>  | 373.1956        | 728.3573         | 364.6823        | <b>727.3733</b>  | 364.1903         | 5  |
| 9  | <b>1242.5597</b> | 621.7835        | <b>1225.5331</b> | 613.2702        | 1224.5491      | 612.7782         | Q    | <b>616.3413</b>  | 308.6743        | <b>599.3148</b>  | 300.1610        | <b>598.3307</b>  | 299.6690         | 4  |
| 10 | <b>1426.6809</b> | 713.8441        | 1409.6543        | 705.3308        | 1408.6703      | 704.8388         | K    | 488.2827         | 244.6450        | <b>471.2562</b>  | 236.1317        | <b>470.2722</b>  | 235.6397         | 3  |
| 11 | <b>1555.7235</b> | 778.3654        | <b>1538.6969</b> | 769.8521        | 1537.7129      | 769.3601         | E    | 304.1615         | 152.5844        | 287.1350         | 144.0711        | 286.1510         | 143.5791         | 2  |
| 12 |                  |                 |                  |                 |                |                  | R    | 175.1190         | 88.0631         | 158.0924         | 79.5498         |                  |                  | 1  |

MS/MS Fragmentation of **GPLPVKR**

Found in **HOY6E7**, RNA-binding motif protein, X chromosome, N-terminally processed (Fragment) OS=Homo sapiens GN=RBMX PE=4 SV=2

Match to Query 808: 835.527988 from(418.771270,2+) intensity(565885.3750)

Title: File1319 Spectrum8509 scans: 9135

Data file I:\2013-9-13-Hela-Prometh-Fr2-ZW.mgf

Click mouse within plot area to zoom in by factor of two about that point

Or,   to  Da

Label all possible matches  Label matches used for scoring

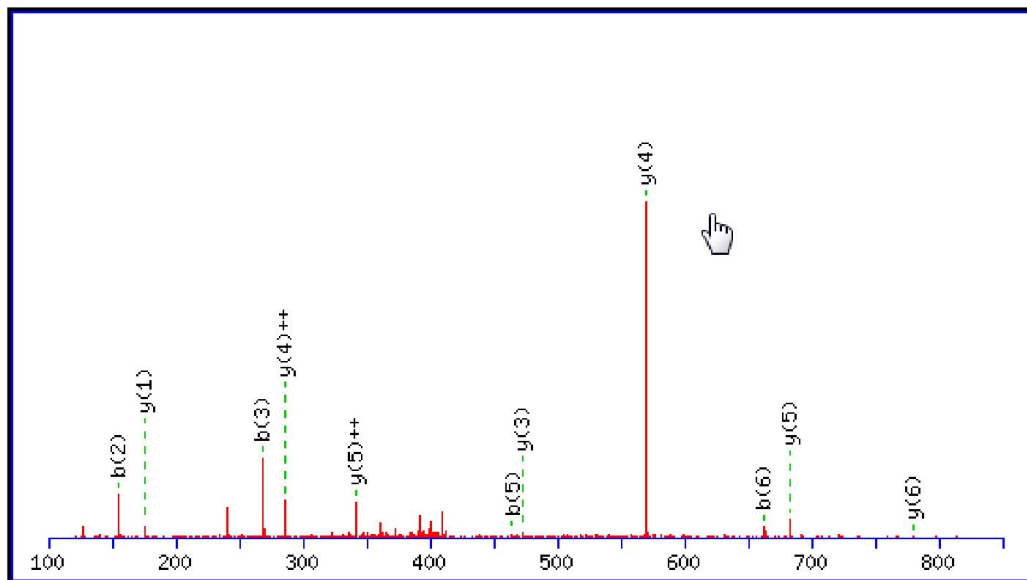

**Monoisotopic mass of neutral peptide Mr(calc):** 835.5280

**Fixed modifications:** Carbamidomethyl (C) (apply to specified residues or termini)

**Variable modifications:**

**K6** : Propionyl-Methylation (K)

**Ions Score:** 49 **Expect:** 0.0028

**Matches** : 11/38 fragment ions using 14 most intense peaks ([help](#))

| # | b               | b <sup>++</sup> | b*       | b <sup>+++</sup> | Seq. | y               | y <sup>++</sup> | y*       | y <sup>+++</sup> | # |
|---|-----------------|-----------------|----------|------------------|------|-----------------|-----------------|----------|------------------|---|
| 1 | 58.0287         | 29.5180         |          |                  | G    |                 |                 |          |                  | 7 |
| 2 | <b>155.0815</b> | 78.0444         |          |                  | P    | <b>779.5138</b> | 390.2605        | 762.4872 | 381.7473         | 6 |
| 3 | <b>268.1656</b> | 134.5864        |          |                  | L    | <b>682.4610</b> | <b>341.7341</b> | 665.4345 | 333.2209         | 5 |
| 4 | 365.2183        | 183.1128        |          |                  | P    | <b>569.3770</b> | <b>285.1921</b> | 552.3504 | 276.6788         | 4 |
| 5 | <b>464.2867</b> | 232.6470        |          |                  | V    | <b>472.3242</b> | 236.6657        | 455.2976 | 228.1525         | 3 |
| 6 | <b>662.4236</b> | 331.7154        | 645.3970 | 323.2022         | K    | 373.2558        | 187.1315        | 356.2292 | 178.6183         | 2 |
| 7 |                 |                 |          |                  | R    | <b>175.1190</b> | 88.0631         | 158.0924 | 79.5498          | 1 |

MS/MS Fragmentation of **GKAKVPASKR**Found in **Q9GZR2-2**, Isoform 2 of RNA exonuclease 4 OS=Homo sapiens GN=REXO4

Match to Query 4992: 1278.765228 from(640.389890,2+) intensity(276350.1563)

Title: File1319 Spectrum11206 scans: 11944

Data file I:\2013-9-13-Hela-Prometh-Fr2-ZW.mgf

Click mouse within plot area to zoom in by factor of two about that point

Or,   to  Da Label all possible matches  Label matches used for scoring 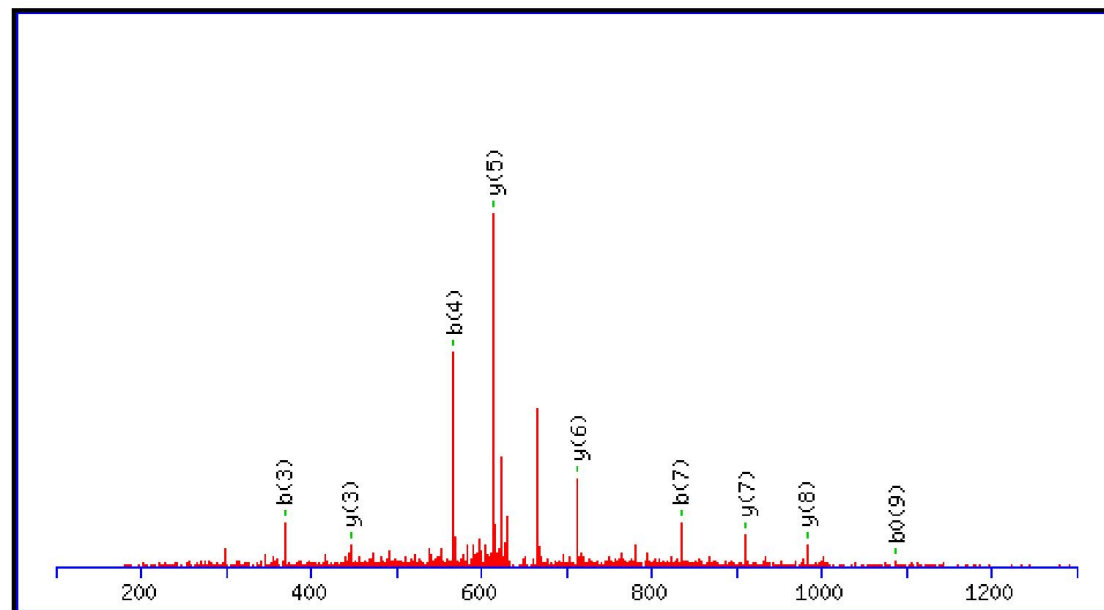**Monoisotopic mass of neutral peptide Mr(calc):** 1278.7659**Fixed modifications:** Carbamidomethyl (C) (apply to specified residues or termini only)**Variable modifications:****N-term :** Acetyl (Protein N-term)**K2 :** Propionyl-Methylation (K)**K4 :** Propionyl-Methylation (K)**K9 :** Propionyl (K)**Ions Score:** 39 **Expect:** 0.059**Matches :** 9/88 fragment ions using 11 most intense peaks:

| #  | b               | b <sup>++</sup> | b*        | b <sup>+++</sup> | b <sup>0</sup>   | b <sup>0++</sup> | Seq. | y               | y <sup>++</sup> | y*        | y <sup>+++</sup> | y <sup>0</sup> | y <sup>0++</sup> | #  |
|----|-----------------|-----------------|-----------|------------------|------------------|------------------|------|-----------------|-----------------|-----------|------------------|----------------|------------------|----|
| 1  | 100.0393        | 50.5233         |           |                  |                  |                  | G    |                 |                 |           |                  |                |                  | 10 |
| 2  | 298.1761        | 149.5317        | 281.1496  | 141.0784         |                  |                  | K    | 1180.7412       | 590.8742        | 1163.7147 | 582.3610         | 1162.7307      | 581.8690         | 9  |
| 3  | <b>369.2132</b> | 185.1103        | 352.1867  | 176.5970         |                  |                  | A    | <b>982.6044</b> | 491.8058        | 965.5778  | 483.2926         | 964.5938       | 482.8006         | 8  |
| 4  | <b>567.3501</b> | 284.1787        | 550.3235  | 275.6654         |                  |                  | K    | <b>911.5673</b> | 456.2873        | 894.5407  | 447.7740         | 893.5567       | 447.2820         | 7  |
| 5  | 666.4185        | 333.7129        | 649.3919  | 325.1996         |                  |                  | V    | <b>713.4304</b> | 357.2189        | 696.4039  | 348.7056         | 695.4199       | 348.2136         | 6  |
| 6  | 763.4713        | 382.2393        | 746.4447  | 373.7280         |                  |                  | P    | <b>614.3620</b> | 307.6847        | 597.3355  | 299.1714         | 596.3515       | 298.6794         | 5  |
| 7  | <b>834.5084</b> | 417.7578        | 817.4818  | 409.2445         |                  |                  | A    | 517.3093        | 259.1583        | 500.2827  | 250.6450         | 499.2987       | 250.1530         | 4  |
| 8  | 921.5404        | 461.2738        | 904.5138  | 452.7606         | 903.5298         | 452.2686         | S    | <b>446.2722</b> | 223.6397        | 429.2456  | 215.1264         | 428.2616       | 214.6344         | 3  |
| 9  | 1105.6616       | 553.3344        | 1088.6350 | 544.8212         | <b>1087.6510</b> | 544.3291         | K    | 359.2401        | 180.1237        | 342.2136  | 171.6104         |                |                  | 2  |
| 10 |                 |                 |           |                  |                  |                  | R    | 175.1190        | 88.0631         | 158.0924  | 79.5498          |                |                  | 1  |

Found in **J3KMZ8**, Zinc finger protein ubi-d4 OS=Homo sapiens GN=DPF2 PE=4 SV=1

Match to Query 6324: 1412.788188 from(707.401370, 2+) intensity(402113.6250)

Title: File1319 Spectrum14746 scans: 15632

Data file I:\2013-9-13-Hela-Prometh-Fr2-ZW.mgf

Click mouse within plot area to zoom in by factor of two about that point

Or,   to  Da Label all possible matches  Label matches used for scoring 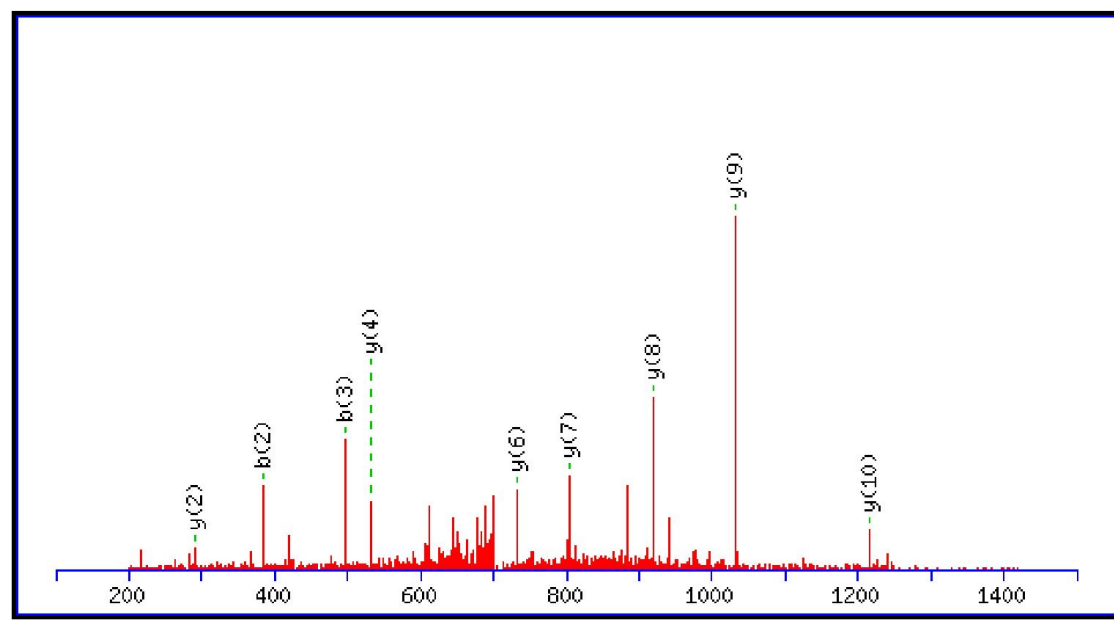**Monoisotopic mass of neutral peptide Mr(calc): 1412.7875****Fixed modifications:** Carbamidomethyl (C) (apply to specified residues or termini only)**Variable modifications:****K1** : Propionyl-Methylation (K)**K2** : Propionyl (K)**Ions Score:** 57 **Expect:** 0.0016**Matches** : 9/112 fragment ions using 13 most intense peak

| #         | b               | b <sup>++</sup> | b <sup>+</sup> | b <sup>+++</sup> | b <sup>0</sup> | b <sup>0++</sup> | Seq.     | y                | y <sup>++</sup> | y <sup>*</sup> | y <sup>+++</sup> | y <sup>0</sup> | y <sup>0++</sup> | #         |
|-----------|-----------------|-----------------|----------------|------------------|----------------|------------------|----------|------------------|-----------------|----------------|------------------|----------------|------------------|-----------|
| <b>1</b>  | 199.1441        | 100.0757        | 182.1176       | 91.5624          |                |                  | <b>K</b> |                  |                 |                |                  |                |                  | <b>11</b> |
| <b>2</b>  | <b>383.2653</b> | 192.1363        | 366.2387       | 183.6230         |                |                  | <b>K</b> | <b>1215.6579</b> | 608.3326        | 1198.6314      | 599.8193         | 1197.6474      | 599.3273         | <b>10</b> |
| <b>3</b>  | <b>496.3493</b> | 248.6783        | 479.3228       | 240.1650         |                |                  | <b>L</b> | <b>1031.5368</b> | 516.2720        | 1014.5102      | 507.7587         | 1013.5262      | 507.2667         | <b>9</b>  |
| <b>4</b>  | 611.3763        | 306.1918        | 594.3497       | 297.6785         | 593.3657       | 297.1865         | <b>D</b> | <b>918.4527</b>  | 459.7300        | 901.4262       | 451.2167         | 900.4421       | 450.7247         | <b>8</b>  |
| <b>5</b>  | 682.4134        | 341.7103        | 665.3869       | 333.1971         | 664.4028       | 332.7051         | <b>A</b> | <b>803.4258</b>  | 402.2165        | 786.3992       | 393.7032         | 785.4152       | 393.2112         | <b>7</b>  |
| <b>6</b>  | 769.4454        | 385.2264        | 752.4189       | 376.7131         | 751.4349       | 376.2211         | <b>S</b> | <b>732.3886</b>  | 366.6980        | 715.3621       | 358.1847         | 714.3781       | 357.6927         | <b>6</b>  |
| <b>7</b>  | 882.5295        | 441.7684        | 865.5029       | 433.2551         | 864.5189       | 432.7631         | <b>I</b> | 645.3566         | 323.1819        | 628.3301       | 314.6687         | 627.3461       | 314.1767         | <b>5</b>  |
| <b>8</b>  | 995.6136        | 498.3104        | 978.5870       | 489.7971         | 977.6030       | 489.3051         | <b>L</b> | <b>532.2726</b>  | 266.6399        | 515.2460       | 258.1266         | 514.2620       | 257.6346         | <b>4</b>  |
| <b>9</b>  | 124.6562        | 562.8317        | 1107.6296      | 554.3184         | 1106.6456      | 553.8264         | <b>E</b> | 419.1885         | 210.0979        | 402.1619       | 201.5846         | 401.1779       | 201.0926         | <b>3</b>  |
| <b>10</b> | 1239.6831       | 620.3452        | 1222.6565      | 611.8319         | 1221.6725      | 611.3399         | <b>D</b> | <b>290.1459</b>  | 145.5766        | 273.1193       | 137.0633         | 272.1353       | 136.5713         | <b>2</b>  |
| <b>11</b> |                 |                 |                |                  |                |                  | <b>R</b> | 175.1190         | 88.0631         | 158.0924       | 79.5498          |                |                  |           |

Match to Query 19651: 2623.319412 from(875.447080, 3+) intensity(75526.3984)

Title: [File]319 Spectrum19069 scans: 20135

Data file I:\2013-9-13-Hela-Prometh-Fr2-ZW.mgf

Click mouse within plot area to zoom in by factor of two about that point

Or,   to  Da Label all possible matches  Label matches used for scoring 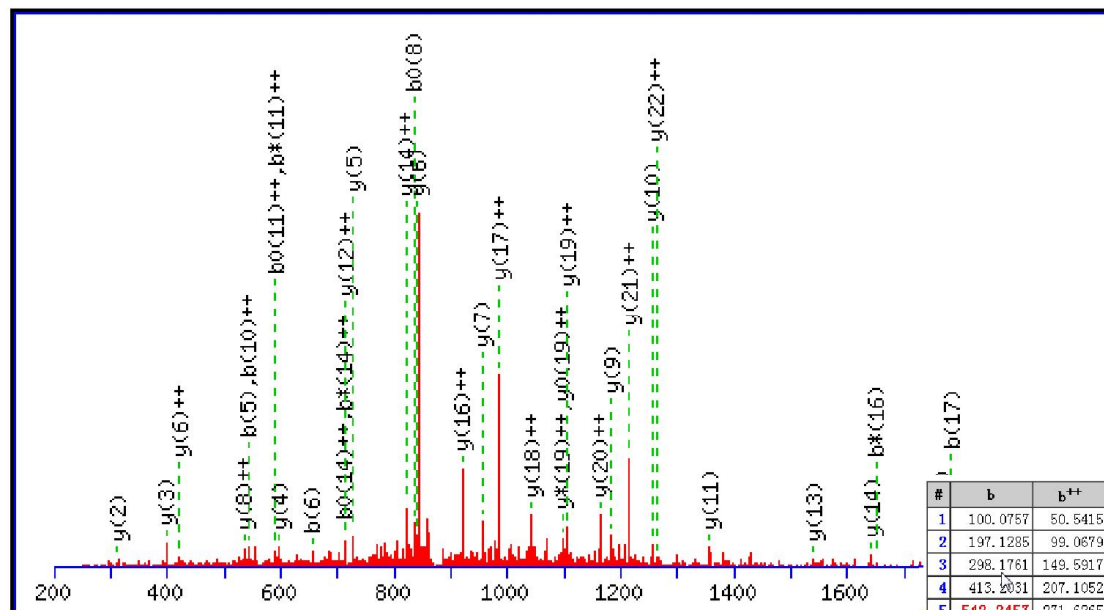Monoisotopic mass of neutral peptide  $M_r(\text{calc})$ : 2623.3163

Fixed modifications: Carbamidomethyl (C) (apply to specified r)

Variable modifications:

K20 : Propionyl-Methylation (K)

Ions Score: 77 Expect: 3.4e-005

Matches : 35/240 fragment ions using 69 most intense peaks (he

| #  | b         | b <sup>++</sup> | b*        | b <sup>+++</sup> | b <sup>0</sup> | b <sup>0++</sup> | Seq. | y         | y <sup>++</sup> | y*        | y <sup>+++</sup> | y <sup>0</sup> | y <sup>0++</sup> | #  |
|----|-----------|-----------------|-----------|------------------|----------------|------------------|------|-----------|-----------------|-----------|------------------|----------------|------------------|----|
| 1  | 100.0757  | 50.5415         |           |                  |                |                  | V    |           |                 |           |                  |                |                  | 23 |
| 2  | 197.1285  | 99.0679         |           |                  |                |                  | P    | 2525.2552 | 1263.1312       | 2508.2286 | 1254.6180        | 2507.2446      | 1254.1260        | 22 |
| 3  | 298.1761  | 149.5917        |           |                  | 280.1656       | 140.5864         | T    | 2428.2024 | 1214.6049       | 2411.1759 | 1206.0916        | 2410.1919      | 1205.5996        | 21 |
| 4  | 413.2031  | 207.1052        |           |                  | 395.1925       | 198.0999         | D    | 2327.1548 | 1164.0810       | 2310.1282 | 1155.5677        | 2309.1442      | 1155.0757        | 20 |
| 5  | 542.2457  | 271.6265        |           |                  | 524.2351       | 262.6212         | E    | 2212.1278 | 1106.5675       | 2195.1013 | 1098.0543        | 2194.1172      | 1097.5623        | 19 |
| 6  | 655.3297  | 328.1685        |           |                  | 637.3192       | 319.1632         | I    | 2083.0852 | 1042.0462       | 2066.0587 | 1033.5330        | 2065.0747      | 1033.0410        | 18 |
| 7  | 784.3723  | 392.6898        |           |                  | 766.3618       | 383.6845         | E    | 1970.0012 | 985.5042        | 1952.9746 | 976.9909         | 1951.9905      | 976.4989         | 17 |
| 8  | 855.4094  | 428.2084        |           |                  | 837.3989       | 419.2031         | A    | 1840.9586 | 920.9829        | 1823.9320 | 912.4696         | 1822.9480      | 911.9776         | 16 |
| 9  | 983.4680  | 492.2376        | 966.4415  | 483.7244         | 965.4575       | 483.2324         | Q    | 1769.9214 | 885.4644        | 1752.8949 | 876.9511         | 1751.9109      | 876.4591         | 15 |
| 10 | 1084.5157 | 542.7615        | 1067.4891 | 534.2482         | 1066.5051      | 533.7562         | T    | 1641.8629 | 821.4351        | 1624.8363 | 812.9218         | 1623.8523      | 812.4298         | 14 |
| 11 | 1197.5998 | 599.3035        | 1180.5732 | 590.7902         | 1179.5892      | 590.2982         | L    | 1540.8152 | 770.9112        | 1523.7886 | 762.3980         | 1522.8046      | 761.9060         | 13 |
| 12 | 1268.6369 | 634.8221        | 1251.6103 | 626.3088         | 1250.6263      | 625.8168         | A    | 1427.7311 | 714.3692        | 1410.7046 | 705.8559         | 1409.7206      | 705.3639         | 12 |
| 13 | 1369.6846 | 685.3459        | 1352.6580 | 676.8326         | 1351.6740      | 676.3406         | T    | 1356.6940 | 678.8506        | 1339.6675 | 670.3374         | 1338.6834      | 669.8454         | 11 |
| 14 | 1440.7217 | 720.8845        | 1423.6951 | 712.3512         | 1422.7111      | 711.8692         | A    | 1255.6463 | 628.3268        | 1238.6198 | 619.8135         | 1237.6358      | 619.3215         | 10 |
| 15 | 1555.7486 | 778.3779        | 1538.7221 | 769.8647         | 1537.7380      | 769.3727         | D    | 1184.6092 | 592.8082        | 1167.5827 | 584.2950         | 1166.5987      | 583.8030         | 9  |
| 16 | 1668.8327 | 834.9200        | 1651.8061 | 826.4067         | 1650.8221      | 825.9147         | L    | 1069.5823 | 535.2948        | 1052.5557 | 526.7815         | 1051.5717      | 526.2895         | 8  |
| 17 | 1783.8596 | 892.4334        | 1766.8331 | 883.9202         | 1765.8491      | 883.4282         | D    | 956.4982  | 478.7527        | 939.4717  | 470.2395         | 938.4876       | 469.7475         | 7  |
| 18 | 1896.9437 | 948.9755        | 1879.9171 | 940.4622         | 1878.9331      | 939.9702         | L    | 841.4713  | 421.2393        | 824.4447  | 412.7260         | 823.4607       | 412.2340         | 6  |
| 19 | 2027.9842 | 1014.4957       | 2010.9576 | 1005.9824        | 2009.9736      | 1005.4904        | M    | 728.3872  | 364.6972        | 711.3607  | 356.1840         | 710.3766       | 355.6920         | 5  |
| 20 | 2226.1210 | 1113.5641       | 2209.0944 | 1105.0509        | 2208.1104      | 1104.5589        | K    | 597.3467  | 299.1770        | 580.3202  | 290.6637         | 579.3362       | 290.1717         | 4  |
| 21 | 2313.1530 | 1157.0801       | 2296.1265 | 1148.5669        | 2295.1425      | 1148.0749        | S    | 399.2099  | 200.1086        | 382.1833  | 191.5953         | 381.1993       | 191.1033         | 3  |
| 22 | 2450.2119 | 1225.6096       | 2433.1854 | 1217.0963        | 2432.2014      | 1216.6043        | H    | 312.1779  | 156.5926        | 295.1513  | 148.0793         |                |                  | 2  |
| 23 |           |                 |           |                  |                |                  | R    | 175.1190  | 88.0631         | 158.0924  | 79.5498          |                |                  | 1  |

MS/MS Fragmentation of PRHQGVIVGNGQKDSYVGDEAQSQR

Found in I3L3I4, Actin, cytoplasmic 2, N-terminally processed OS=Homo sapiens GN=ACTG1 PE=2 SV=1

Match to Query 21386: 2885.380692 from(962.800840, 3+) intensity(91224.3594)

Title: File1319 Spectrum11628 scans: 12384

Data file I:\2013-9-13-Hela-Prometh-Fr2-ZW.mgf

Click mouse within plot area to zoom in by factor of two about that point

Or, Plot from 200 to 2000 Da Full range

Label all possible matches Label matches used for scoring

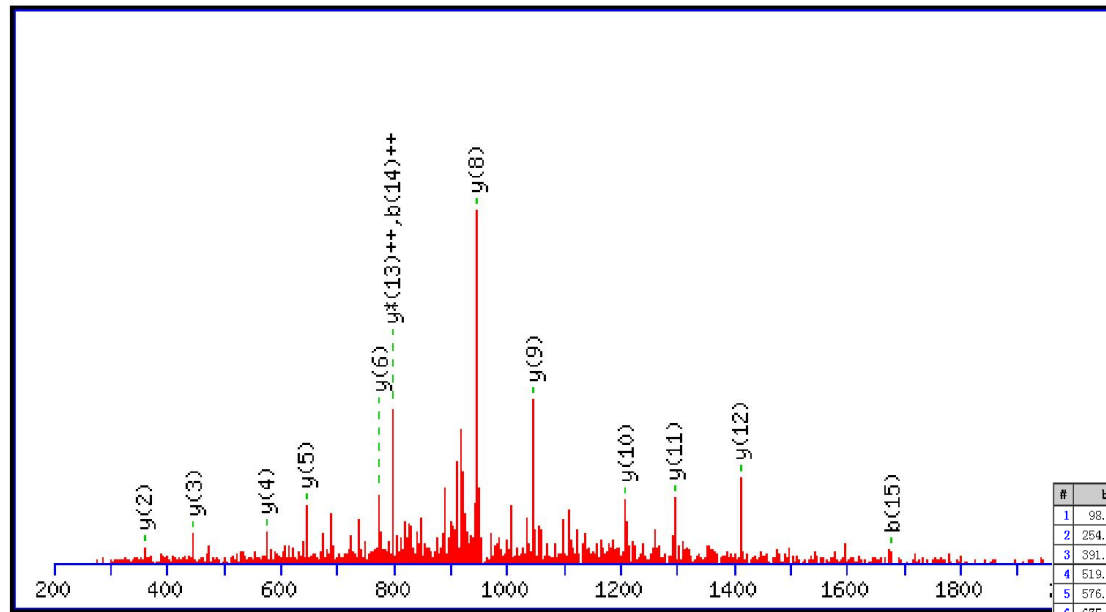

Table with 13 columns: #, b, b++, b+, b+\*\*, b0, b0\*\*, Seq., y, y++, y+, y+\*\*, y0, y0\*\*, #. It lists 25 rows of data corresponding to the mass spectrum peaks.

Monoisotopic mass of neutral peptide Mr(calc): 2885.3913
Fixed modifications: Carbamidomethyl (C) (apply to specified residues of)
Variable modifications:
K13 : Propionyl-Methylation (K)
K24 : Propionyl (K)
Ions Score: 64 Expect: 0.00041
Matches : 13/256 fragment ions using 17 most intense peaks (help)



# MS/MS Fragmentation of **KREPEDEGEDDD**

Found in **P39687**, Acidic leucine-rich nuclear phosphoprotein 32 family member A OS=Homo sapiens GN=ANP32A PE=1 SV=1

233

Match to Query 7668: 1502.602388 from(752.308470,2+) intensity(470317.4688)

Title: File1319 Spectrum4011 scans: 4441

Data file I:\2013-9-13-Hela-Prometh-Fr2-ZW.mgf

Click mouse within plot area to zoom in by factor of two about that point

Or,   to  Da

Label all possible matches  Label matches used for scoring

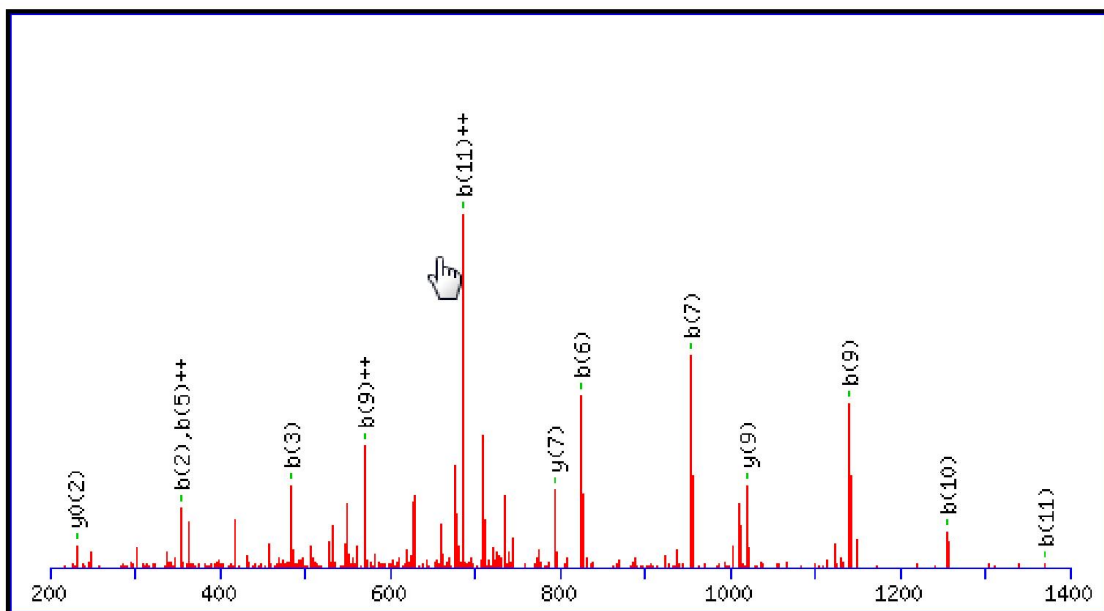

**Monoisotopic mass of neutral peptide Mr(calc): 1502.6009**

**Fixed modifications:** Carbamidomethyl (C) (apply to specific...)

**Variable modifications:**

**K1** : Propionyl-Methylation (K)

**Ions Score: 70 Expect: 1.7e-006**

**Matches : 13/108 fragment ions using 12 most intense peaks**

| #  | b                | b <sup>++</sup> | b*        | b <sup>+++</sup> | b <sup>0</sup> | b <sup>0++</sup> | Seq. | y                | y <sup>++</sup> | y*        | y <sup>+++</sup> | y <sup>0</sup>  | y <sup>0++</sup> | #  |
|----|------------------|-----------------|-----------|------------------|----------------|------------------|------|------------------|-----------------|-----------|------------------|-----------------|------------------|----|
| 1  | 199.1441         | 100.0757        | 182.1176  | 91.5624          |                |                  | K    |                  |                 |           |                  |                 |                  | 12 |
| 2  | <b>355.2452</b>  | 178.1262        | 338.2187  | 169.6130         |                |                  | R    | 1305.4713        | 653.2393        | 1288.4448 | 644.7260         | 1237.4608       | 644.2340         | 11 |
| 3  | <b>484.2878</b>  | 242.6475        | 467.2613  | 234.1343         | 466.2772       | 233.6423         | B    | 1149.3702        | 575.1887        |           |                  | 1131.3596       | 566.1835         | 10 |
| 4  | 581.3406         | 291.1739        | 564.3140  | 282.6606         | 563.3300       | 282.1686         | P    | <b>1020.3276</b> | 510.6674        |           |                  | 1002.3171       | 501.6622         | 9  |
| 5  | 710.3832         | <b>355.6952</b> | 693.3566  | 347.1819         | 692.3726       | 346.6899         | E    | 923.2749         | 462.1411        |           |                  | 905.2643        | 453.1358         | 8  |
| 6  | <b>625.4101</b>  | 413.2087        | 808.3836  | 404.6954         | 807.3995       | 404.2034         | D    | <b>794.2323</b>  | 397.6198        |           |                  | 776.2217        | 388.6145         | 7  |
| 7  | <b>954.4527</b>  | 477.7300        | 937.4262  | 469.2167         | 936.4421       | 468.7247         | E    | 679.2053         | 340.1063        |           |                  | 661.1948        | 331.1010         | 6  |
| 8  | 1011.4742        | 506.2407        | 994.4476  | 497.7274         | 993.4636       | 497.2354         | G    | 550.1627         | 275.5850        |           |                  | 532.1522        | 266.5797         | 5  |
| 9  | <b>1140.5168</b> | <b>570.7620</b> | 1123.4902 | 562.2487         | 1122.5062      | 561.7567         | E    | 493.1413         | 247.0743        |           |                  | 475.1307        | 238.0690         | 4  |
| 10 | <b>1255.5437</b> | 628.2755        | 1238.5172 | 619.7622         | 1237.5331      | 619.2702         | D    | 364.0987         | 182.5530        |           |                  | 346.0881        | 173.5477         | 3  |
| 11 | <b>1370.5706</b> | <b>685.7890</b> | 1353.5441 | 677.2757         | 1352.5401      | 676.7837         | D    | 249.0717         | 125.0395        |           |                  | <b>231.0612</b> | 116.0342         | 2  |
| 12 |                  |                 |           |                  |                |                  | D    | 134.0448         | 67.5260         |           |                  | 116.0342        | 58.5207          | 1  |

MS/MS Fragmentation of **GKAGVQR**Found in **G3V2D6**, Heterogeneous nuclear ribonucleoproteins C1/C2 (Fragment) OS=Homo sapiens GN=HNRNPC PE=2 SV=1 **234**

Match to Query 708: 840.518648 from(421.266600, 2+) intensity(698397.8125)

Title: File1322 Spectrum5110 scans: 5633

Data file I:\2013-9-13-Hela-Prometh-Fr1-ZW.mgf

Click mouse within plot area to zoom in by factor of two about that point

Or,   to  Da Label all possible matches  Label matches used for scoring 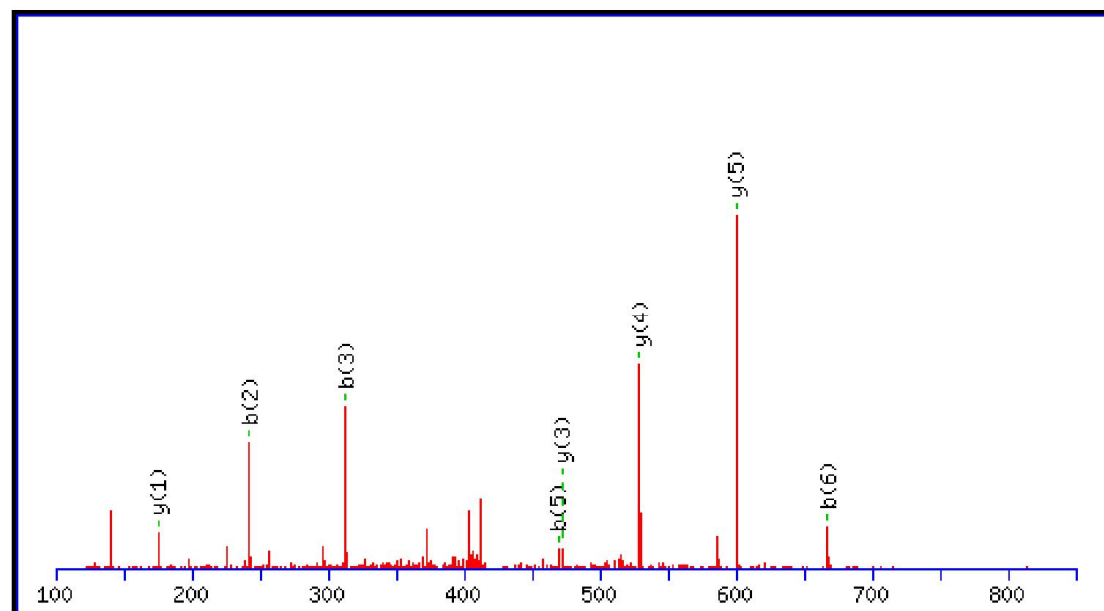**Monoisotopic mass of neutral peptide Mr(calc):** 840.5181**Fixed modifications:** Carbamidomethyl (C) (apply to specified residues or termini only)**Variable modifications:****K2** : Propionyl (K)**K6** : Propionyl-Methylation (K)**Ions Score:** 37 **Expect:** 0.064**Matches** : 8/46 fragment ions using 13 most intense peaks ([help](#))

| # | b               | b <sup>++</sup> | b*       | b <sup>*++</sup> | Seq. | y               | y <sup>++</sup> | y*       | y <sup>*++</sup> | # |
|---|-----------------|-----------------|----------|------------------|------|-----------------|-----------------|----------|------------------|---|
| 1 | 58.0287         | 29.5180         |          |                  | G    |                 |                 |          |                  | 7 |
| 2 | <b>242.1499</b> | 121.5786        | 225.1234 | 113.0653         | K    | 784.5040        | 392.7556        | 767.4774 | 384.2423         | 6 |
| 3 | <b>313.1870</b> | 157.0972        | 296.1605 | 148.5839         | A    | <b>600.3828</b> | 300.6950        | 583.3562 | 292.1817         | 5 |
| 4 | 370.2085        | 185.6079        | 353.1819 | 177.0946         | G    | <b>529.3457</b> | 265.1765        | 512.3191 | 256.6632         | 4 |
| 5 | <b>469.2769</b> | 235.1421        | 452.2504 | 226.6288         | V    | <b>472.3242</b> | 236.6657        | 455.2976 | 228.1525         | 3 |
| 6 | <b>667.4137</b> | 334.2105        | 650.3872 | 325.6972         | K    | 373.2558        | 187.1315        | 356.2292 | 178.6183         | 2 |
| 7 |                 |                 |          |                  | R    | <b>175.1190</b> | 88.0631         | 153.0924 | 79.5498          | 1 |

Match to Query 15938: 2591.407328 from(1296.710940,2+) intensity(102551.4297)  
 Title: File:281 Spectrum21228 scans: 22802  
 Data file I:\2013-9-12-Hela-Prometh-Fr19-ZW.mgf

Click mouse within plot area to zoom in by factor of two about that point  
 Or,   to  Da   
 Label all possible matches  Label matches used for scoring

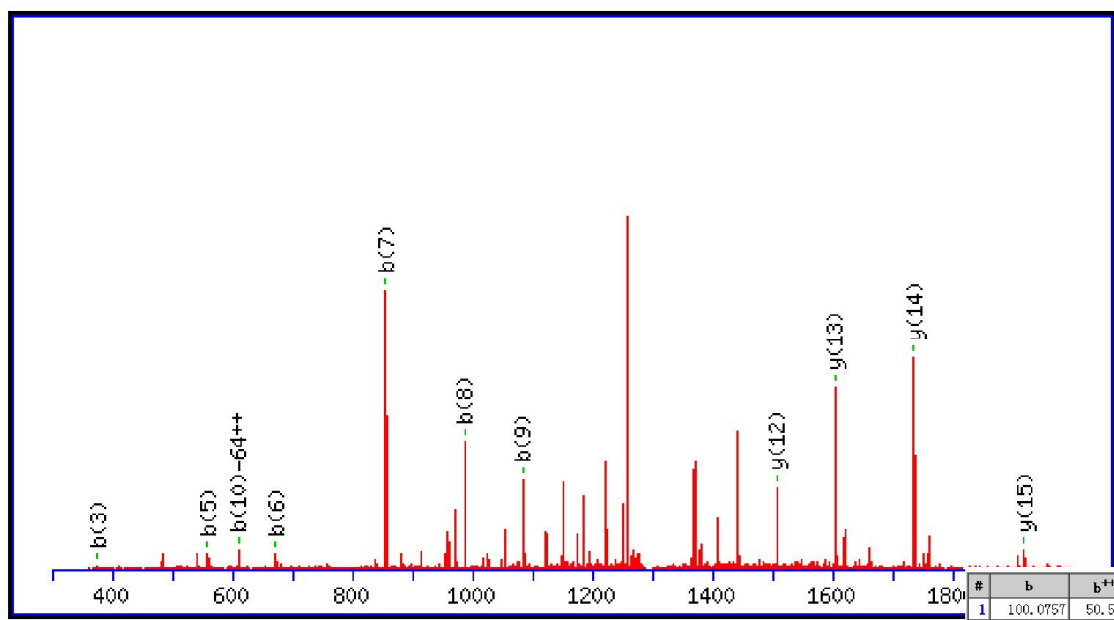

**Monoisotopic mass of neutral peptide Mr(calc): 2590.4227**  
**Fixed modifications:** Carbamidomethyl (C) (apply to specified residue)  
**Variable modifications:**  
**K3** : Oxidation (M), with neutral losses 0.0000(shown in table),  
**K7** : Propionyl (K)  
**K10** : Propionyl-Methylation (K)  
**K14** : Propionyl-Methylation (K)  
**Ions Score: 28 Expect: 1.9**  
**Matches : 11/342 fragment ions using 17 most intense peaks (help)**

| #  | b                | b <sup>++</sup> | b*        | b <sup>+++</sup> | b <sup>0</sup> | b <sup>0++</sup> | Seq. | y                | y <sup>++</sup> | y*        | y <sup>+++</sup> | y <sup>0</sup> | y <sup>0++</sup> | #  |
|----|------------------|-----------------|-----------|------------------|----------------|------------------|------|------------------|-----------------|-----------|------------------|----------------|------------------|----|
| 1  | 100.0757         | 50.5415         |           |                  |                |                  | V    |                  |                 |           |                  |                |                  | 21 |
| 2  | 228.1343         | 114.5708        | 211.1077  | 106.0575         |                |                  | Q    | 2492.3615        | 1246.6844       | 2475.3350 | 1238.1711        | 2474.3510      | 1237.6791        | 20 |
| 3  | <b>375.1697</b>  | 188.0885        | 358.1431  | 179.5752         |                |                  | H    | 2364.3029        | 1182.6551       | 2347.2764 | 1174.1418        | 2346.2924      | 1173.6498        | 19 |
| 4  | 472.3224         | 236.6149        | 455.1959  | 228.1016         |                |                  | P    | 2217.2875        | 1109.1374       | 2200.2410 | 1100.6241        | 2199.2570      | 1100.1321        | 18 |
| 5  | <b>559.2545</b>  | 280.1309        | 542.2279  | 271.6176         | 541.2439       | 271.1256         | S    | 2120.2148        | 1060.6110       | 2103.1882 | 1052.0978        | 2102.2042      | 1051.6057        | 17 |
| 6  | <b>672.3385</b>  | 336.6729        | 655.3120  | 328.1596         | 654.3280       | 327.6676         | L    | 2033.1827        | 1017.0950       | 2016.1562 | 1008.5817        | 2015.1722      | 1008.0897        | 16 |
| 7  | <b>856.4597</b>  | 428.7335        | 839.4332  | 420.2202         | 838.4491       | 419.7282         | K    | <b>1920.0987</b> | 960.5530        | 1903.0721 | 952.0397         | 1902.0881      | 951.5477         | 15 |
| 8  | <b>987.5002</b>  | 494.2537        | 970.4736  | 485.7405         | 969.4896       | 485.2484         | H    | <b>1735.9775</b> | 868.4924        | 1718.9510 | 859.9791         | 1717.9669      | 859.4871         | 14 |
| 9  | <b>1084.5530</b> | 542.7801        | 1067.5264 | 534.2668         | 1066.5424      | 533.7748         | P    | <b>1604.9370</b> | 802.9721        | 1587.9105 | 794.4589         | 1586.9265      | 793.9669         | 13 |
| 10 | 1282.6893        | 641.8485        | 1265.6632 | 633.3353         | 1264.6792      | 632.8432         | K    | <b>1507.8843</b> | 754.4458        | 1490.8577 | 745.9325         | 1489.8737      | 745.4405         | 12 |
| 11 | 1381.7582        | 691.3827        | 1364.7316 | 682.8695         | 1363.7476      | 682.3775         | V    | 1309.7474        | 655.3774        | 1292.7209 | 646.8641         | 1291.7369      | 646.3721         | 11 |
| 12 | 1496.7851        | 748.8952        | 1479.7586 | 740.3829         | 1478.7746      | 739.8909         | D    | 1210.6790        | 605.8431        | 1193.6525 | 597.3299         | 1192.6684      | 596.8379         | 10 |
| 13 | 1609.8692        | 805.4382        | 1592.8427 | 796.9250         | 1591.8586      | 796.4330         | L    | 1095.6521        | 548.3297        | 1078.6255 | 539.8164         | 1077.6415      | 539.3244         | 9  |
| 14 | 1808.0050        | 904.5067        | 1790.9795 | 895.9934         | 1789.9955      | 895.5014         | K    | 982.5680         | 491.7876        | 965.5415  | 483.2744         | 964.5574       | 482.7824         | 8  |
| 15 | 1865.0275        | 933.0174        | 1848.0009 | 924.5041         | 1847.0169      | 924.0121         | G    | 784.4312         | 392.7192        | 767.4046  | 384.2060         | 766.4206       | 383.7139         | 7  |
| 16 | 1962.0803        | 981.5439        | 1945.0637 | 973.0305         | 1944.0697      | 972.5385         | P    | 727.4097         | 364.2085        | 710.3832  | 355.6952         | 709.3991       | 355.2032         | 6  |
| 17 | 2090.1388        | 1045.5731       | 2073.1123 | 1037.0598        | 2072.1283      | 1036.5678        | Q    | 630.3570         | 315.6821        | 613.3304  | 307.1688         | 612.3464       | 306.6768         | 5  |
| 18 | 2189.2072        | 1095.1073       | 2172.1807 | 1086.5940        | 2171.1967      | 1086.1020        | V    | 502.2984         | 251.6528        | 485.2718  | 243.1395         | 484.2878       | 242.6475         | 4  |
| 19 | 2318.2498        | 1159.6286       | 2301.2233 | 1151.1153        | 2300.2393      | 1150.6233        | E    | 403.2300         | 202.1186        | 386.2034  | 193.6053         | 385.2194       | 193.1133         | 3  |
| 20 | 2417.3183        | 1209.1628       | 2400.2917 | 1200.6495        | 2399.3077      | 1200.1575        | V    | 274.1874         | 137.5973        | 257.1608  | 129.0840         |                |                  | 2  |
| 21 |                  |                 |           |                  |                |                  | R    | 175.1190         | 88.0631         | 158.0924  | 79.5498          |                |                  | 1  |

MS/MS Fragmentation of **KKAAAAAWEPPSSGNGTAR**  
Found in **Q9P258**, Protein RCC2 OS=Homo sapiens GN=RCC2 PE=1 SV=2

Match to Query 15937: 2027.009922 from(676.677250,3+) intensity(207188.5625)  
Title: File1322 Spectrum9575 scans: 10284  
Data file I:\2013-9-13-Hela-Prometh-Frl-ZW.mgf

Click mouse within plot area to zoom in by factor of two about that point  
Or,  to  Da   
Label all possible matches  Label matches used for scoring

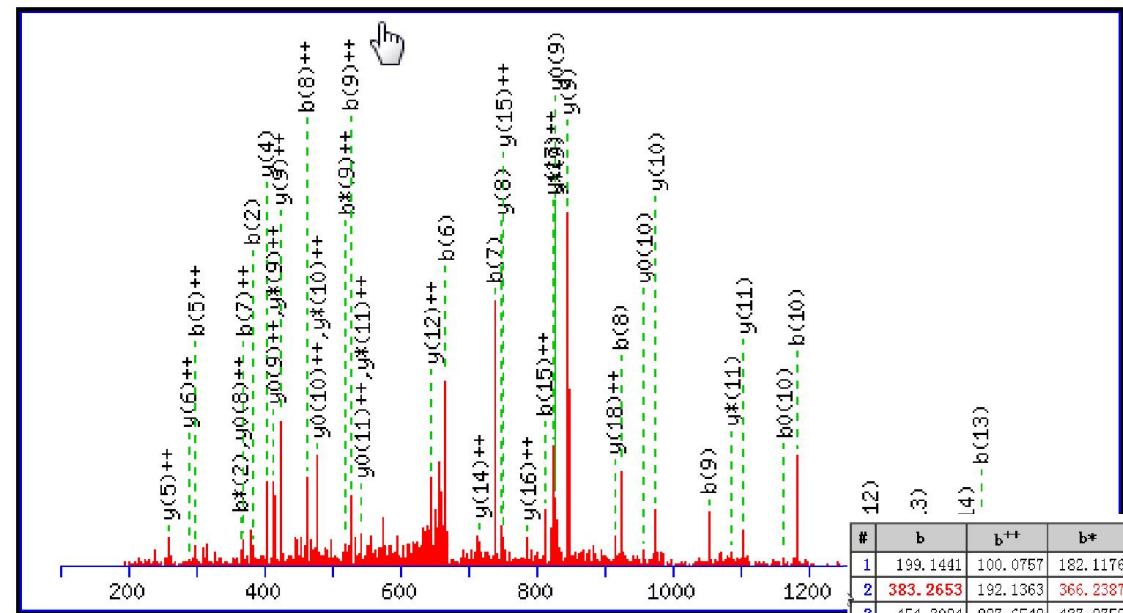

**Monoisotopic mass of neutral peptide Mr(calc):** 2027.0  
**Fixed modifications:** Carbamidomethyl (C) (apply to specific)  
**Variable modifications:**  
K1 : Propionyl-Methylation (K)  
K2 : Propionyl (K)  
**Ions Score:** 40 **Expect:** 0.1  
**Matches :** 43/196 fragment ions using 104 most intense peak

| #  | b                | b <sup>++</sup> | b*              | b <sup>+++</sup> | b <sup>0</sup>   | b <sup>0++</sup> | Seq. | y                | y <sup>++</sup> | y*              | y <sup>+++</sup> | y <sup>0</sup>  | y <sup>0++</sup> | #         |
|----|------------------|-----------------|-----------------|------------------|------------------|------------------|------|------------------|-----------------|-----------------|------------------|-----------------|------------------|-----------|
| 1  | 199.1441         | 100.0757        | 182.1176        | 91.5624          |                  |                  | K    |                  |                 |                 |                  |                 |                  | 19        |
| 2  | <b>383.2653</b>  | 192.1363        | <b>366.2387</b> | 183.6230         |                  |                  | K    | 1829.8777        | <b>915.4425</b> | 1812.8511       | 906.9292         | 1811.8671       | 906.4372         | <b>18</b> |
| 3  | 454.3024         | 227.6548        | 437.2758        | 219.1416         |                  |                  | A    | 1645.7565        | <b>823.3819</b> | 1628.7299       | 814.8686         | 1627.7459       | 814.3766         | <b>17</b> |
| 4  | 525.3395         | 263.1734        | 508.3130        | 254.6601         |                  |                  | A    | 1574.7194        | <b>787.8633</b> | 1557.6928       | 779.3501         | 1556.7088       | 778.8580         | <b>16</b> |
| 5  | 596.3766         | <b>298.6920</b> | 579.3501        | 290.1787         |                  |                  | A    | 1503.6828        | <b>752.3448</b> | 1486.6557       | 743.8315         | 1485.8717       | 743.3395         | <b>15</b> |
| 6  | <b>667.4137</b>  | 334.2105        | 650.3872        | 325.6972         |                  |                  | A    | <b>1432.6451</b> | <b>716.8262</b> | 1415.6186       | 708.3129         | 1414.6346       | 707.8209         | <b>14</b> |
| 7  | <b>738.4509</b>  | <b>369.7291</b> | 721.4243        | 361.2158         |                  |                  | A    | <b>1361.6080</b> | 681.3077        | 1344.5815       | 672.7944         | 1343.5975       | 672.3024         | <b>13</b> |
| 8  | <b>924.5302</b>  | <b>462.7687</b> | 907.5038        | 454.2554         |                  |                  | W    | <b>1290.5709</b> | 645.7891        | 1273.5444       | 637.2758         | 1272.5604       | 636.7838         | <b>12</b> |
| 9  | <b>1053.5728</b> | <b>527.2900</b> | 1036.5462       | 518.7767         | 1035.5622        | 518.2847         | E    | <b>1104.4916</b> | 552.7494        | 1087.4651       | 544.2362         | 1086.4810       | 543.7442         | <b>11</b> |
| 10 | <b>1182.6154</b> | 591.8113        | 1165.5888       | 583.2980         | <b>1164.6048</b> | 582.8060         | E    | <b>975.4490</b>  | 488.2281        | 958.4225        | <b>479.7149</b>  | <b>957.4394</b> | <b>479.2229</b>  | <b>10</b> |
| 11 | 1279.6681        | 640.3377        | 1262.6416       | 631.8244         | 1261.6576        | 631.3324         | P    | <b>846.4064</b>  | <b>423.7068</b> | <b>829.3799</b> | <b>415.1936</b>  | <b>828.3969</b> | <b>414.7016</b>  | <b>9</b>  |
| 12 | 1366.7001        | 683.8537        | 1349.6736       | 675.3404         | 1348.6896        | 674.8484         | S    | <b>749.3537</b>  | 375.1805        | 732.3271        | 366.6672         | 731.3431        | <b>366.1752</b>  | <b>8</b>  |
| 13 | <b>1453.7322</b> | 727.3697        | 1436.7058       | 718.8564         | 1435.7216        | 718.3644         | S    | 662.3216         | 331.6645        | 645.2951        | 323.1512         | 644.3111        | 322.6592         | <b>7</b>  |
| 14 | 1510.7536        | 755.8805        | 1493.7271       | 747.3672         | 1492.7431        | 746.8752         | G    | 575.2896         | <b>288.1484</b> | 558.2631        | 279.6352         | 557.2790        | 279.1432         | <b>6</b>  |
| 15 | 1624.7966        | <b>812.9019</b> | 1607.7700       | 804.3886         | 1606.7880        | 803.8966         | N    | 518.2681         | <b>259.6377</b> | 501.2416        | 251.1244         | 500.2576        | 250.6324         | <b>5</b>  |
| 16 | 1681.8180        | 841.4127        | 1664.7915       | 832.8994         | 1663.8075        | 832.4074         | G    | <b>404.2252</b>  | 202.6162        | 387.1987        | 194.1030         | 386.2146        | 193.6110         | <b>4</b>  |
| 17 | 1782.8657        | 891.9365        | 1765.8392       | 883.4232         | 1764.8551        | 882.9312         | T    | 347.2037         | 174.1055        | 330.1772        | 165.5922         | 329.1932        | 165.1002         | <b>3</b>  |
| 18 | 1853.9028        | 927.4550        | 1836.8763       | 918.9418         | 1835.8923        | 918.4498         | A    | 246.1561         | 123.5817        | 229.1295        | 115.0684         |                 |                  | <b>2</b>  |
| 19 |                  |                 |                 |                  |                  |                  | R    | 175.1190         | 88.0631         | 158.0924        | 79.5498          |                 |                  | <b>1</b>  |

MS/MS Fragmentation of **KASGPPVSELITKAVAASKER**

Found in **P10412**, Histone H1.4 OS=Homo sapiens GN=HIST1H1E PE=1 SV=2

Match to Query 15046: 2320.301472 from(774.441100, 3+) intensity(36450.2734)

Title: File1314 Spectrum18970 scans: 20490

Data file I:\2013-9-13-Hela-Prometh-Fr16-ZW.mgf

Click mouse within plot area to zoom in by factor of two about that point

Or,   to  Da

Label all possible matches  Label matches used for scoring

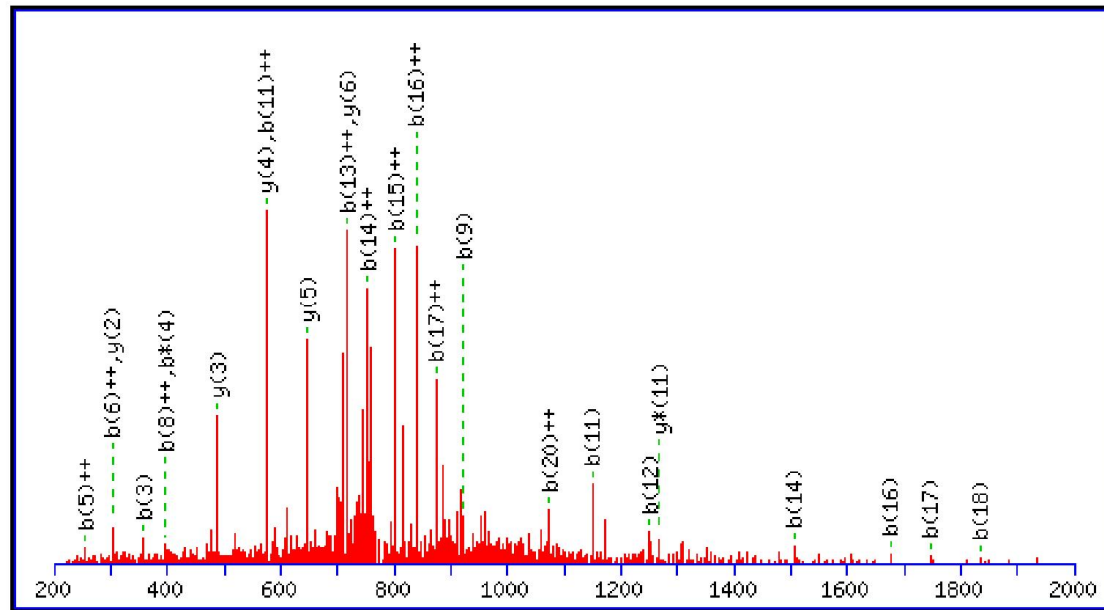

**Monoisotopic mass of neutral peptide Mr(calc): 2320.3002**

**Fixed modifications:** Carbamidomethyl (C) (apply to specified residues or t

**Variable modifications:**

**K1** : Propionyl-Methylation (K)

**K13** : Propionyl (K)

**K19** : Propionyl (K)

**Ions Score: 62** **Expect: 0.00056**

**Matches : 25/234** fragment ions using 35 most intense peaks ([help](#))

| #  | b                | b <sup>++</sup>  | b <sup>+</sup>  | b <sup>++</sup> | b <sup>0</sup> | b <sup>0++</sup> | Seq. | y               | y <sup>++</sup> | y <sup>+</sup>   | y <sup>++</sup> | y <sup>0</sup> | y <sup>0++</sup> | #  |
|----|------------------|------------------|-----------------|-----------------|----------------|------------------|------|-----------------|-----------------|------------------|-----------------|----------------|------------------|----|
| 1  | 199.1441         | 100.0757         | 182.1176        | 91.5624         |                |                  | K    |                 |                 |                  |                 |                |                  | 21 |
| 2  | 270.1812         | 135.5942         | 253.1547        | 127.0810        |                |                  | A    | 2123.1707       | 1062.0890       | 2106.1441        | 1063.5757       | 2105.1601      | 1063.0837        | 20 |
| 3  | <b>357.2138</b>  | 173.1103         | 340.1867        | 170.5970        | 339.2027       | 170.1050         | S    | 2052.1335       | 1026.5704       | 2035.1070        | 1018.0571       | 2034.1230      | 1017.5651        | 19 |
| 4  | 414.2347         | 207.6210         | <b>397.2082</b> | 199.1077        | 396.2241       | 198.6157         | G    | 1965.1015       | 983.0544        | 1948.0750        | 974.5411        | 1947.0910      | 974.0491         | 18 |
| 5  | 511.2875         | <b>256.1474</b>  | 494.2609        | 247.6341        | 493.2769       | 247.1421         | P    | 1908.0801       | 954.5437        | 1891.0535        | 946.0304        | 1890.0695      | 945.5384         | 17 |
| 6  | 608.3402         | <b>304.6738</b>  | 591.3137        | 296.1605        | 590.3297       | 295.6685         | P    | 1811.0273       | 906.0173        | 1794.0007        | 897.5040        | 1793.0167      | 897.0120         | 16 |
| 7  | 707.4087         | 354.2080         | 690.3821        | 345.6947        | 689.3981       | 345.2027         | V    | 1713.9745       | 857.4909        | 1696.9480        | 848.9776        | 1695.9640      | 848.4856         | 15 |
| 8  | 794.4407         | <b>397.7240</b>  | 777.4141        | 389.2107        | 776.4301       | 388.7187         | S    | 1614.9061       | 807.9567        | 1597.8796        | 799.4434        | 1596.8955      | 798.9514         | 14 |
| 9  | <b>923.4833</b>  | 462.2453         | 906.4567        | 453.7320        | 905.4727       | 453.2400         | K    | 1527.8741       | 764.4407        | 1510.8475        | 755.9274        | 1509.8635      | 755.4354         | 13 |
| 10 | 1036.5673        | 518.7873         | 1019.5408       | 510.2740        | 1018.5568      | 509.7820         | L    | 1398.8315       | 699.9194        | 1381.8049        | 691.4061        | 1380.8209      | 690.9141         | 12 |
| 11 | <b>1149.6514</b> | <b>575.3293</b>  | 1132.6249       | 566.8161        | 1131.6408      | 566.3241         | I    | 1285.7474       | 643.3774        | <b>1268.7209</b> | 634.8641        | 1267.7369      | 634.3721         | 11 |
| 12 | <b>1250.6991</b> | 625.8532         | 1233.6728       | 617.3399        | 1232.6885      | 616.8479         | T    | 1172.6634       | 586.8353        | 1155.6368        | 578.3220        | 1154.6528      | 577.8300         | 10 |
| 13 | 1434.8203        | <b>717.9138</b>  | 1417.7937       | 709.4005        | 1416.8097      | 708.9085         | K    | 1071.6157       | 536.3115        | 1054.5891        | 527.7982        | 1053.6051      | 527.3062         | 9  |
| 14 | <b>1505.8574</b> | <b>753.4320</b>  | 1488.8308       | 744.9190        | 1487.8468      | 744.4270         | A    | 887.4945        | 444.2509        | 870.4680         | 435.7376        | 869.4839       | 435.2456         | 8  |
| 15 | 1604.9258        | <b>802.9650</b>  | 1587.8992       | 794.4533        | 1586.9152      | 793.9612         | V    | 816.4574        | 408.7323        | 799.4308         | 400.2191        | 798.4468       | 399.7271         | 7  |
| 16 | <b>1675.9629</b> | <b>838.4851</b>  | 1658.9364       | 829.9718        | 1657.9523      | 829.4798         | A    | <b>717.3890</b> | 359.1981        | 700.3624         | 350.6849        | 699.3784       | 350.1928         | 6  |
| 17 | <b>1747.0000</b> | <b>874.0036</b>  | 1729.9735       | 865.4904        | 1728.9894      | 864.9984         | A    | <b>546.3519</b> | 323.8796        | 629.3253         | 315.1663        | 628.3413       | 314.6743         | 5  |
| 18 | <b>1834.0320</b> | 917.5197         | 1817.0055       | 909.0064        | 1816.0215      | 908.5144         | S    | <b>575.3148</b> | 288.1610        | 558.2882         | 279.6477        | 557.3042       | 279.1557         | 4  |
| 19 | 2018.1532        | 1009.5802        | 2001.1267       | 1001.0670       | 2000.1427      | 1000.5750        | K    | <b>488.2827</b> | 244.6450        | 471.2562         | 236.1317        | 470.2722       | 235.6397         | 3  |
| 20 | 2147.1958        | <b>1074.1015</b> | 2130.1693       | 1065.5883       | 2129.1852      | 1065.0963        | K    | <b>304.1615</b> | 152.5844        | 287.1350         | 144.0711        | 286.1510       | 143.5791         | 2  |
| 21 |                  |                  |                 |                 |                |                  | R    | 175.1190        | 88.0631         | 158.0924         | 79.5498         |                |                  | 1  |

Match to Query 5212: 1131.578468 from(566.796510, 2+) intensity(5204.7188)

Title: File1314 Spectrum3445 scans: 3985

Data file I:\2013-9-13-Hela-Prometh-Fri16-ZW.mgf

Click mouse within plot area to zoom in by factor of two about that point

Or,   to  Da Label all possible matches  Label matches used for scoring 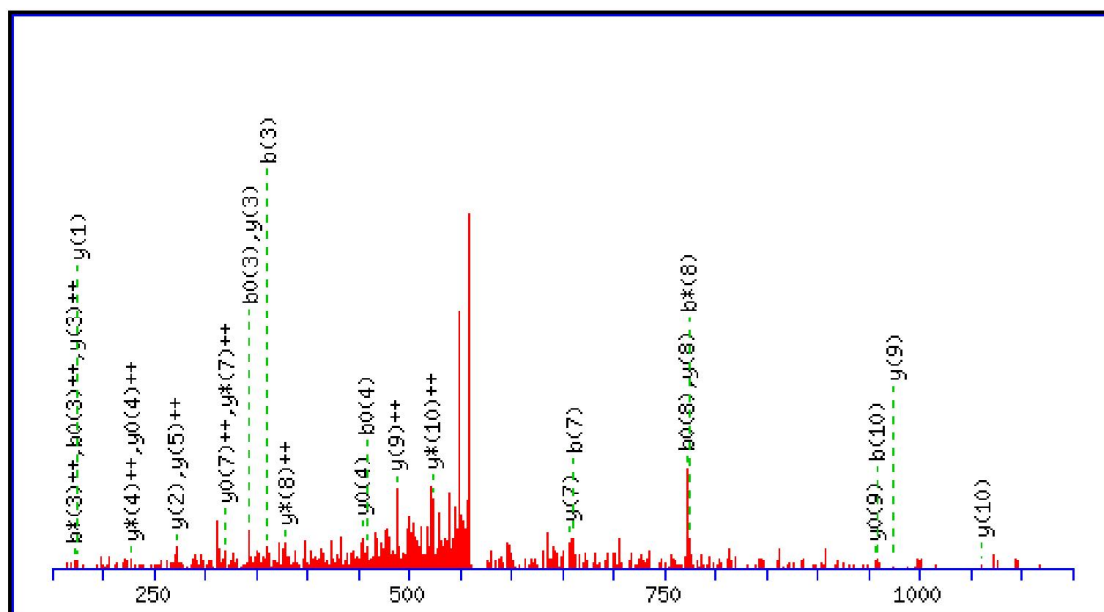Monoisotopic mass of neutral peptide **Mr(calc)**: 1131.5793

Fixed modifications: Carbamidomethyl (C) (apply to specified residues or termini only)

Variable modifications:

**K3** : Propionyl-(13CD3)Methyl (K)

Ions Score: 23 Expect: 2.5

Matches : 27/108 fragment ions using 77 most intense peak

| #  | b               | b <sup>++</sup> | b*              | b <sup>+++</sup> | b <sup>0</sup>  | b <sup>0++</sup> | Seq. | y                | y <sup>++</sup> | y*        | y <sup>+++</sup> | y <sup>0</sup>  | y <sup>0++</sup> | #  |
|----|-----------------|-----------------|-----------------|------------------|-----------------|------------------|------|------------------|-----------------|-----------|------------------|-----------------|------------------|----|
| 1  | 72.0444         | 36.5258         |                 |                  |                 |                  | A    |                  |                 |           |                  |                 |                  | 11 |
| 2  | 159.0764        | 80.0418         |                 |                  | 141.0659        | 71.0366          | S    | <b>1061.5494</b> | 531.2784        | 1044.5229 | <b>522.7651</b>  | 1043.5389       | 522.2731         | 10 |
| 3  | <b>361.2354</b> | 181.1214        | 344.2089        | <b>172.6081</b>  | <b>343.2249</b> | <b>172.1161</b>  | K    | <b>974.5174</b>  | <b>487.7623</b> | 957.4909  | 479.2491         | <b>956.5069</b> | 478.7571         | 9  |
| 4  | 476.2624        | 238.6348        | 459.2358        | 230.1216         | <b>458.2518</b> | 229.6295         | D    | <b>772.3584</b>  | 386.6828        | 755.3319  | <b>378.1696</b>  | 754.3478        | 377.6776         | 8  |
| 5  | 533.2838        | 267.1456        | 516.2573        | 258.6323         | 515.2733        | 258.1403         | G    | <b>657.3315</b>  | 329.1694        | 640.3049  | <b>320.6561</b>  | 639.3209        | <b>320.1641</b>  | 7  |
| 6  | 590.3053        | 295.6563        | 573.2788        | 287.1430         | 572.2947        | 286.6510         | G    | 600.3100         | 300.6586        | 583.2835  | 292.1454         | 582.2994        | 291.6534         | 6  |
| 7  | <b>661.3424</b> | 331.1748        | 644.3159        | 322.6616         | 643.3319        | 322.1696         | A    | 543.2885         | <b>272.1479</b> | 526.2620  | 263.6346         | 525.2780        | 263.1426         | 5  |
| 8  | 790.3850        | 395.6961        | <b>773.3585</b> | 387.1829         | <b>772.3744</b> | 386.6909         | E    | 472.2514         | 236.6293        | 455.2249  | <b>228.1161</b>  | <b>454.2409</b> | <b>227.6241</b>  | 4  |
| 9  | 861.4221        | 431.2147        | 844.3956        | 422.7014         | 843.4116        | 422.2094         | A    | <b>343.2088</b>  | <b>172.1081</b> | 326.1823  | 163.5948         |                 |                  | 3  |
| 10 | <b>958.4749</b> | 479.7411        | 941.4483        | 471.2278         | 940.4643        | 470.7358         | P    | <b>272.1717</b>  | 136.5895        | 255.1452  | 128.0762         |                 |                  | 2  |
| 11 |                 |                 |                 |                  |                 |                  | R    | <b>175.1190</b>  | 88.0631         | 158.0924  | 79.5498          |                 |                  | 1  |

Match to Query 12072: 1842.939462 from(615.320430, 3+) intensity(31119.9961)

Title: File1314 Spectrum13036 scans: 14285

Data file I:\2013-9-13-Hela-Prometh-Fr16-ZW.mgf

Click mouse within plot area to zoom in by factor of two about that point

Or,   to  Da Label all possible matches  Label matches used for scoring 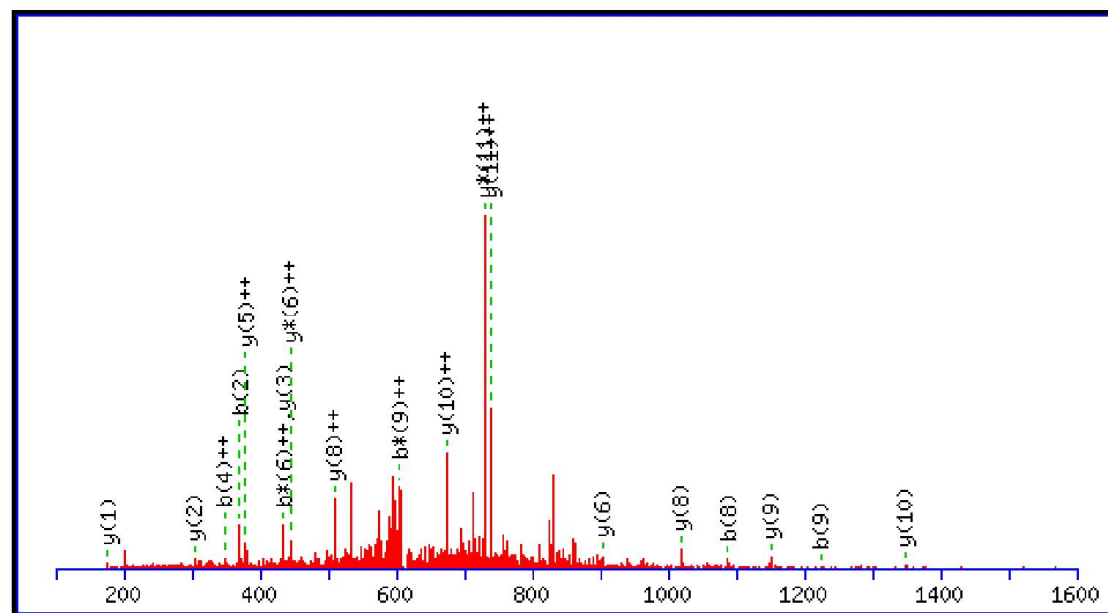**Monoisotopic mass of neutral peptide Mr(calc):** 1842.9385**Fixed modifications:** Carbamidomethyl (C) (apply to specified residues or 1)**Variable modifications:****K1** : Propionyl (K)**K2** : Propionyl (K)**K4** : Propionyl-Methylation (K)**Ions Score:** 27 **Expect:** 2.1**Matches** : 19/96 fragment ions using 41 most intense peaks ([help](#))

| #  | b                | b <sup>++</sup> | b <sup>+</sup> | b <sup>++</sup> | Seq. | y                | y <sup>++</sup> | y <sup>+</sup> | y <sup>++</sup> | #  |
|----|------------------|-----------------|----------------|-----------------|------|------------------|-----------------|----------------|-----------------|----|
| 1  | 185.1285         | 93.0679         | 168.1019       | 84.5546         | K    |                  |                 |                |                 | 13 |
| 2  | <b>369.2496</b>  | 185.1285        | 352.2231       | 176.6152        | K    | 1659.8247        | 830.4160        | 1642.7981      | 821.9027        | 12 |
| 3  | 497.3082         | 249.1577        | 480.2817       | 240.6445        | Q    | 1475.7085        | <b>738.3554</b> | 1458.6769      | <b>729.8421</b> | 11 |
| 4  | 695.4450         | <b>348.2262</b> | 678.4185       | 339.7129        | K    | <b>1347.6449</b> | <b>674.3261</b> | 1330.6183      | 665.8128        | 10 |
| 5  | 826.4855         | 413.7464        | 809.4590       | 405.2331        | K    | <b>1149.5081</b> | 575.2577        | 1132.4815      | 566.7444        | 9  |
| 6  | 883.5070         | 442.2571        | 866.4804       | <b>433.7439</b> | G    | <b>1018.4676</b> | <b>509.7374</b> | 1001.4410      | 501.2242        | 8  |
| 7  | 940.5285         | 470.7679        | 923.5019       | 462.2546        | G    | 961.4461         | 481.2267        | 944.4196       | 472.7134        | 7  |
| 8  | <b>1087.5969</b> | 544.3021        | 1070.5703      | 535.7888        | F    | <b>904.4247</b>  | 452.7160        | 887.3981       | <b>444.2027</b> | 6  |
| 9  | <b>1224.6558</b> | 612.8315        | 1207.6292      | <b>604.3183</b> | H    | 757.3562         | <b>379.1818</b> | 740.3297       | 370.6685        | 5  |
| 10 | 1410.7351        | 705.8712        | 1393.7085      | 697.3579        | W    | 620.2973         | 310.6523        | 603.2708       | 302.1390        | 4  |
| 11 | 1541.7756        | 771.3914        | 1524.7490      | 762.8782        | K    | <b>434.2180</b>  | 217.6126        | 417.1915       | 209.0994        | 3  |
| 12 | 1669.8342        | 835.4207        | 1652.8076      | 826.9074        | Q    | <b>303.1775</b>  | 152.0924        | 286.1510       | 143.5791        | 2  |
| 13 |                  |                 |                |                 | R    | <b>175.1190</b>  | 88.0631         | 158.0924       | 79.5498         | 1  |

Match to Query 2137: 891.493068 from(446.753810, 2+) intensity(14596.0762)

Title: File1314 Spectrum3221 scans: 3737

Data file I:\2013-9-13-Hela-Prometh-Fri16-ZW.mgf

Click mouse within plot area to zoom in by factor of two about that point

Or,   to  Da Label all possible matches  Label matches used for scoring 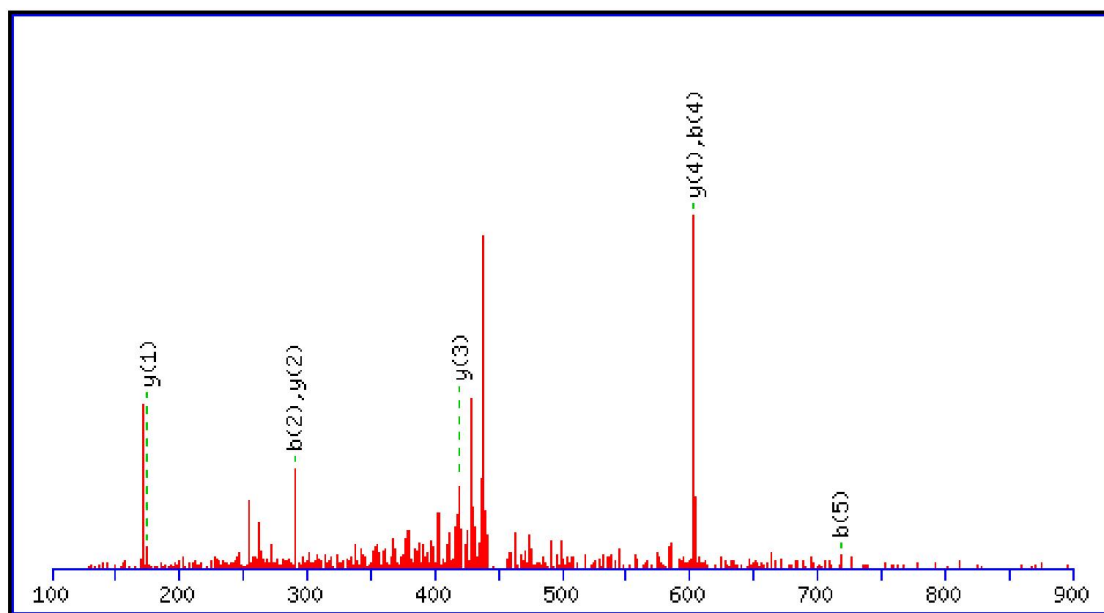**Monoisotopic mass of neutral peptide Mr(calc):** 891.4934**Fixed modifications:** Carbamidomethyl (C) (apply to specified residues or termini only)**Variable modifications:****K2** : Propionyl-(13CD3)Meth**K3** : Propionyl (K)**Ions Score:** 22 **Expect:** 2.8**Matches** : 7/56 fragment ions v

| # | b               | b <sup>++</sup> | b <sup>+</sup> | b <sup>+++</sup> | b <sup>0</sup> | b <sup>0++</sup> | Seq. | y               | y <sup>++</sup> | y <sup>+</sup> | y <sup>+++</sup> | y <sup>0</sup> | y <sup>0++</sup> | # |
|---|-----------------|-----------------|----------------|------------------|----------------|------------------|------|-----------------|-----------------|----------------|------------------|----------------|------------------|---|
| 1 | 88.0393         | 44.5233         |                |                  | 70.0287        | 35.5180          | S    |                 |                 |                |                  |                |                  | 6 |
| 2 | <b>290.1983</b> | 145.6028        | 273.1718       | 137.0895         | 272.1878       | 136.5975         | K    | 805.4687        | 403.2380        | 788.4421       | 394.7247         | 787.4581       | 394.2327         | 5 |
| 3 | 474.3195        | 237.6634        | 457.2929       | 229.1501         | 456.3089       | 228.6581         | K    | <b>603.3097</b> | 302.1585        | 586.2831       | 293.6452         | 585.2991       | 293.1532         | 4 |
| 4 | <b>603.3621</b> | 302.1847        | 586.3355       | 293.6714         | 585.3515       | 293.1794         | E    | <b>419.1885</b> | 210.0979        | 402.1619       | 201.5846         | 401.1779       | 201.0926         | 3 |
| 5 | <b>718.3890</b> | 359.6945        | 701.3625       | 351.1849         | 700.3785       | 350.6929         | D    | <b>290.1459</b> | 145.5766        | 273.1193       | 137.0633         | 272.1353       | 136.5713         | 2 |
| 6 |                 |                 |                |                  |                |                  | R    | <b>175.1190</b> | 88.0631         | 158.0924       | 79.5498          |                |                  | 1 |



Found in **H7C2Q8**, EBNA1 binding protein 2, isoform CRA\_d OS=Homo sapiens GN=EBNA1BP2 PE=2 SV=1

Match to Query 6562: 1383.763288 from(692.888920, 2+) intensity(153472.7656)

Title: File1322 Spectrum6440 scans: 7018

Data file I:\2013-9-13-Hela-Prometh-Fr1-ZW.mgf

Click mouse within plot area to zoom in by factor of two about that point

Or,   to  Da Label all possible matches  Label matches used for scoring 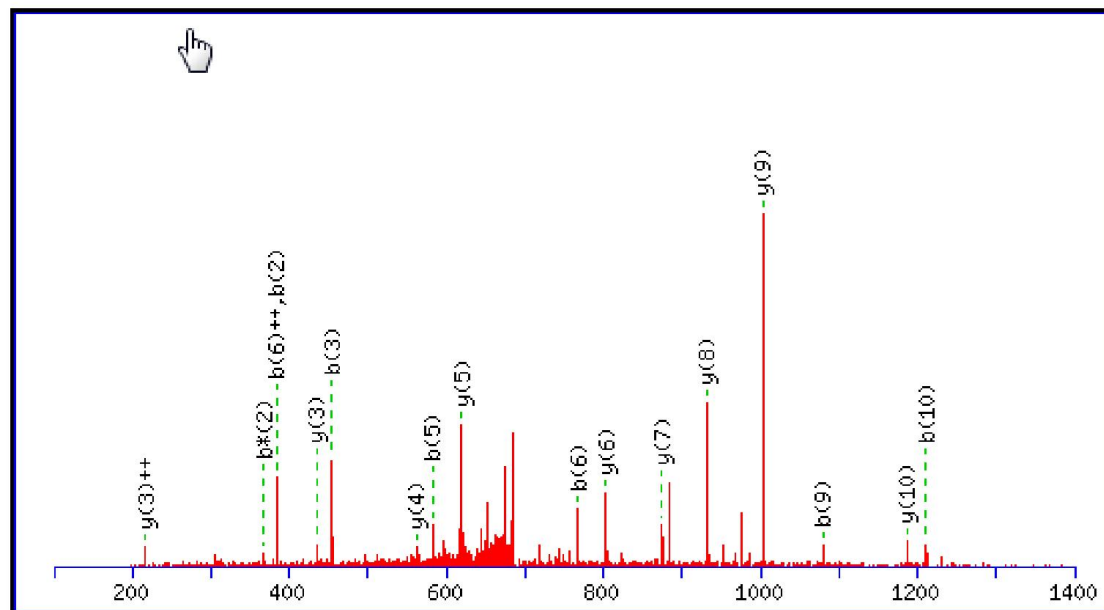**Monoisotopic mass of neutral peptide Mr(calc):** 1383.7656**Fixed modifications:** Carbamidomethyl (C) (apply to specified residues or**Variable modifications:****K1** : Propionyl-Methylation (K)**K2** : Propionyl (K)**K6** : Propionyl (K)**Ions Score:** 48 **Expect:** 0.014**Matches** : 17/80 fragment ions using 36 most intense peaks ([help](#))

| #  | b                | b <sup>++</sup> | b <sup>*</sup>  | b <sup>*++</sup> | Seq. | y                | y <sup>++</sup> | y <sup>*</sup> | y <sup>*++</sup> | #  |
|----|------------------|-----------------|-----------------|------------------|------|------------------|-----------------|----------------|------------------|----|
| 1  | 199.1441         | 100.0757        | 182.1176        | 91.5624          | K    |                  |                 |                |                  | 11 |
| 2  | <b>383.2653</b>  | 192.1363        | <b>366.2387</b> | 183.6230         | K    | <b>1186.6361</b> | 593.8217        | 1169.6096      | 585.3084         | 10 |
| 3  | <b>454.3024</b>  | 227.6548        | 437.2758        | 219.1416         | A    | <b>1002.5149</b> | 501.7611        | 985.4884       | 493.2478         | 9  |
| 4  | 511.3239         | 256.1656        | 494.2973        | 247.6523         | G    | <b>931.4778</b>  | 466.2425        | 914.4513       | 457.7293         | 8  |
| 5  | <b>582.3610</b>  | 291.6841        | 565.3344        | 283.1709         | A    | <b>874.4563</b>  | 437.7318        | 857.4298       | 429.2185         | 7  |
| 6  | <b>766.4822</b>  | <b>383.7447</b> | 749.4556        | 375.2314         | K    | <b>803.4192</b>  | 402.2133        | 786.3927       | 393.7000         | 6  |
| 7  | 823.5036         | 412.2554        | 806.4771        | 403.7422         | G    | <b>619.2981</b>  | 310.1527        | 602.2715       | 301.6394         | 5  |
| 8  | 951.5622         | 476.2847        | 934.5356        | 467.7715         | Q    | <b>562.2766</b>  | 281.6419        | 545.2500       | 273.1287         | 4  |
| 9  | <b>1079.6208</b> | 540.3140        | 1062.5942       | 531.8007         | Q    | <b>434.2180</b>  | <b>217.6126</b> | 417.1915       | 209.0994         | 3  |
| 10 | <b>1210.6613</b> | 605.8343        | 1193.6347       | 597.3210         | I    | 306.1594         | 153.5834        | 289.1329       | 145.0701         | 2  |
| 11 |                  |                 |                 |                  | R    | 175.1190         | 88.0631         | 158.0924       | 79.5498          | 1  |

Found in **Q5HYI8**, Rab-like protein 3 OS=Homo sapiens GN=RABL3 PE=1 SV=1

Match to Query 4724: 1381.714088 from(691.864320, 2+) intensity(154506.0469)

Title: File1296 Spectrum10302 scans: 11892

Data file I:\2013-9-12-Hela-Prometh-Fri14-ZW.mgf

Click mouse within plot area to zoom in by factor of two about that point

Or,   to  Da Label all possible matches  Label matches used for scoring 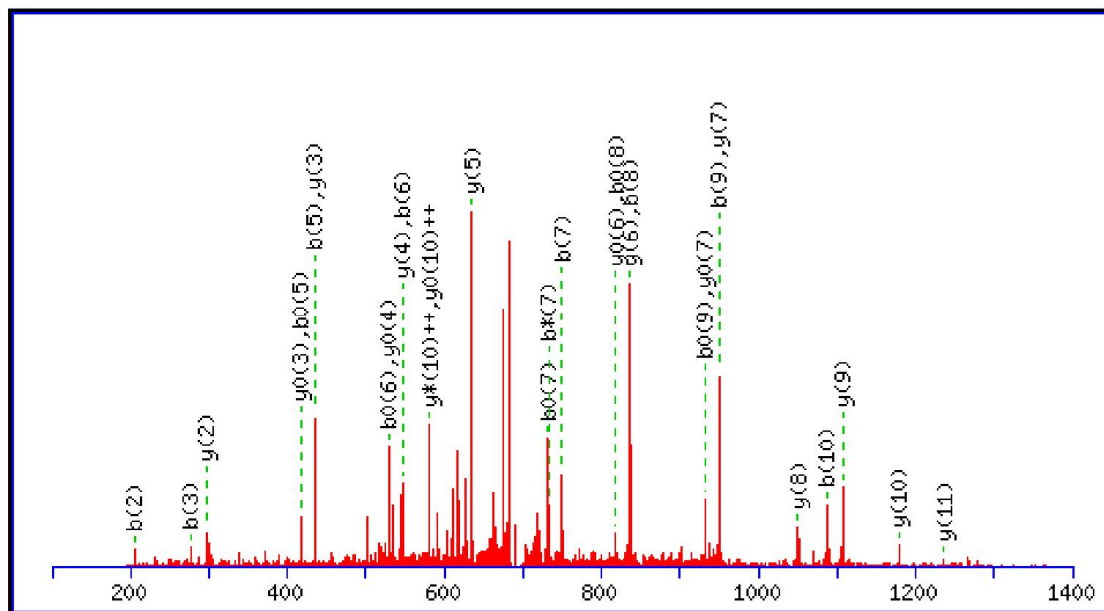**Monoisotopic mass of neutral peptide Mr(calc):** 1381.7151**Fixed modifications:** Carbamidomethyl (C) (apply to specified residues)**Variable modifications:****K7** : Propionyl-(13CD3)Methyl (K)**Ions Score:** 80 **Expect:** 5.8e-006**Matches** : 30/102 fragment ions using 36 most intense peaks (h)

| #  | b                | b <sup>++</sup> | b <sup>*</sup>  | b <sup>++</sup> | b <sup>0</sup>  | b <sup>0++</sup> | Seq. | y                | y <sup>++</sup> | y <sup>*</sup> | y <sup>++</sup> | y <sup>0</sup>  | y <sup>0++</sup> | #  |
|----|------------------|-----------------|-----------------|-----------------|-----------------|------------------|------|------------------|-----------------|----------------|-----------------|-----------------|------------------|----|
| 1  | 148.0757         | 74.5415         |                 |                 |                 |                  | F    |                  |                 |                |                 |                 |                  | 12 |
| 2  | <b>205.0972</b>  | 103.0522        |                 |                 |                 |                  | G    | <b>1235.6539</b> | 618.3306        | 1218.6274      | 609.8173        | 1217.6434       | 609.3253         | 11 |
| 3  | <b>276.1343</b>  | 138.5708        |                 |                 |                 |                  | A    | <b>1178.6325</b> | 589.8199        | 1161.6059      | <b>581.3066</b> | 1160.6219       | <b>580.8146</b>  | 10 |
| 4  | 333.1557         | 167.0815        |                 |                 |                 |                  | G    | <b>1107.5953</b> | 554.3013        | 1090.5688      | 545.7880        | 1089.5848       | 545.2960         | 9  |
| 5  | <b>434.2034</b>  | 217.6053        |                 |                 | 416.1928        | 208.6001         | T    | <b>1050.5739</b> | 525.7906        | 1033.5473      | 517.2773        | 1032.5633       | 516.7853         | 8  |
| 6  | <b>547.2875</b>  | 274.1474        |                 |                 | 529.2769        | 265.1421         | L    | <b>949.5262</b>  | 475.2667        | 932.4996       | 466.7535        | <b>931.5156</b> | 466.2615         | 7  |
| 7  | <b>749.4465</b>  | 375.2269        | <b>732.4199</b> | 366.7136        | <b>731.4359</b> | 366.2216         | K    | <b>836.4421</b>  | 418.7247        | 819.4156       | 410.2114        | <b>818.4316</b> | 409.7194         | 6  |
| 8  | <b>836.4785</b>  | 418.7429        | 819.4520        | 410.2296        | <b>818.4680</b> | 409.7376         | S    | <b>634.2831</b>  | 317.6452        |                |                 | 616.2726        | 308.6399         | 5  |
| 9  | <b>949.5626</b>  | 475.2849        | 932.5360        | 466.7717        | <b>931.5520</b> | 466.2796         | L    | <b>547.2511</b>  | 274.1292        |                |                 | <b>529.2405</b> | 265.1239         | 4  |
| 10 | <b>1086.6215</b> | 543.8144        | 1069.5949       | 535.3011        | 1068.6109       | 534.8091         | H    | <b>434.1670</b>  | 217.5872        |                |                 | <b>416.1565</b> | 208.5819         | 3  |
| 11 | 1249.6848        | 625.3460        | 1232.6583       | 616.3328        | 1231.6743       | 616.3408         | Y    | <b>297.1081</b>  | 149.0577        |                |                 | 279.0975        | 140.0524         | 2  |
| 12 |                  |                 |                 |                 |                 |                  | D    | 134.0448         | 67.5260         |                |                 | 116.0342        | 58.5207          | 1  |

Match to Query 11319: 2057.057708 from(1029.536130, 2+) intensity(86979.5938)

Title: File1296 Spectrum11710 scans: 13359

Data file I:\2013-9-12-Hela-Prometh-Fr14-ZW.mgf

Click mouse within plot area to zoom in by factor of two about that point

Or,   to  Da Label all possible matches  Label matches used for scoring 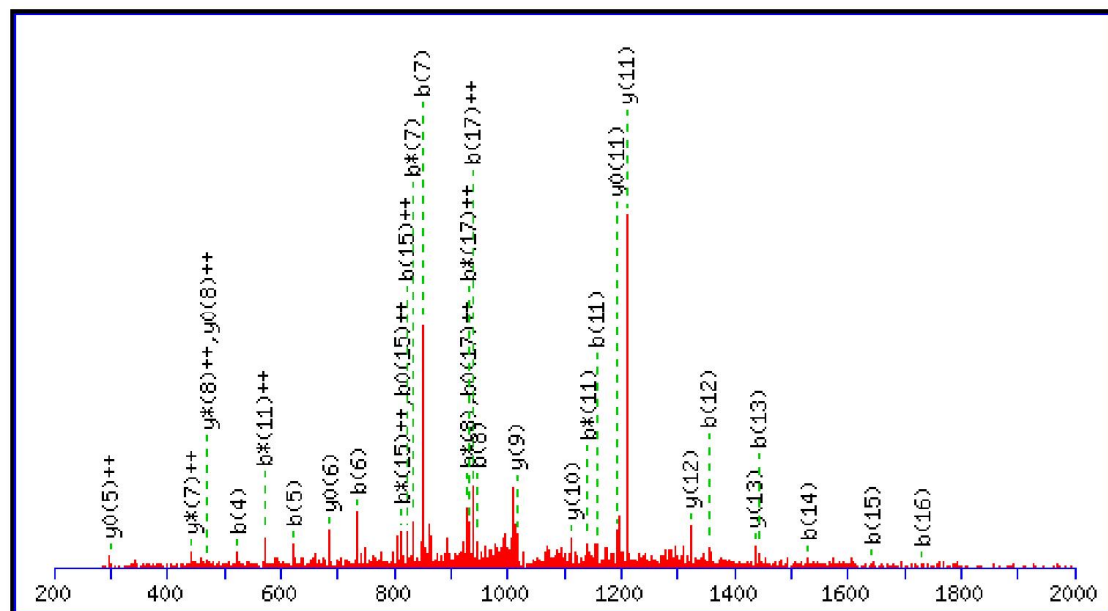**Monoisotopic mass of neutral peptide Mr(calc):** 2057.0582**Fixed modifications:** Carbamidomethyl (C) (apply to specified residues or**Variable modifications:****K4** : Propionyl (K)**K12** : Propionyl-Methylation (K)**Ions Score:** 29 **Expect:** 1.4**Matches** : 32/184 fragment ions using 103 most intense peaks ([help](#))

| #  | b                | b <sup>++</sup> | b*               | b <sup>++</sup> | b <sup>0</sup> | b <sup>0++</sup> | Seq. | y                | y <sup>++</sup> | y*        | y <sup>++</sup> | y <sup>0</sup>   | y <sup>0++</sup> | #  |
|----|------------------|-----------------|------------------|-----------------|----------------|------------------|------|------------------|-----------------|-----------|-----------------|------------------|------------------|----|
| 1  | 88.0393          | 44.5233         |                  |                 | 70.0287        | 35.5180          | S    |                  |                 |           |                 |                  |                  | 18 |
| 2  | 225.0982         | 113.0527        |                  |                 | 207.0877       | 104.0475         | H    | 1971.0334        | 986.0204        | 1954.0069 | 977.5071        | 1953.0229        | 977.0151         | 17 |
| 3  | 339.1411         | 170.0742        | 322.1146         | 161.9609        | 321.1306       | 161.0689         | N    | 1833.9745        | 917.4909        | 1816.9480 | 908.9776        | 1815.9640        | 908.4856         | 16 |
| 4  | <b>523.2623</b>  | 262.1348        | 506.2358         | 253.6215        | 505.2518       | 253.1295         | K    | 1719.9316        | 860.4694        | 1702.9051 | 851.9562        | 1701.9210        | 851.4642         | 15 |
| 5  | <b>622.3307</b>  | 311.6690        | 605.3042         | 303.1557        | 604.3202       | 302.6637         | V    | 1535.8104        | 768.4088        | 1518.7839 | 759.8956        | 1517.7999        | 759.4036         | 14 |
| 6  | <b>735.4148</b>  | 368.2110        | 718.3882         | 359.6978        | 717.4042       | 359.2058         | L    | <b>1436.7420</b> | 718.8746        | 1419.7155 | 710.3614        | 1418.7314        | 709.8694         | 13 |
| 7  | <b>849.4577</b>  | 425.2325        | <b>832.4312</b>  | 416.7192        | 831.4472       | 416.2272         | N    | <b>1323.6579</b> | 662.3326        | 1306.6314 | 653.8193        | 1305.6474        | 653.3273         | 12 |
| 8  | <b>946.5105</b>  | 473.7589        | <b>929.4839</b>  | 465.2456        | 928.4999       | 464.7536         | P    | <b>1209.6150</b> | 605.3111        | 1192.5885 | 596.7979        | <b>1191.6045</b> | 596.3069         | 11 |
| 9  | 1043.5633        | 522.2853        | 1026.5367        | 513.7720        | 1025.5527      | 513.2800         | P    | <b>1112.5623</b> | 556.7848        | 1095.5357 | 548.2715        | 1094.5517        | 547.7795         | 10 |
| 10 | 1100.5847        | 550.7960        | 1083.5682        | 542.2827        | 1082.5742      | 541.7907         | G    | <b>1015.5095</b> | 508.2584        | 998.4829  | 499.7451        | 997.4989         | 499.2531         | 9  |
| 11 | <b>1157.6062</b> | 579.3067        | <b>1140.5796</b> | <b>570.7935</b> | 1139.5956      | 570.3014         | G    | 958.4880         | 479.7477        | 941.4615  | <b>471.2344</b> | 940.4775         | <b>470.7424</b>  | 8  |
| 12 | <b>1355.7430</b> | 678.3751        | 1338.7165        | 669.8619        | 1337.7324      | 669.3699         | K    | 901.4666         | 451.2369        | 884.4400  | <b>442.7236</b> | 883.4560         | 442.2316         | 7  |
| 13 | <b>1442.7750</b> | 721.8912        | 1425.7485        | 713.3779        | 1424.7645      | 712.8859         | S    | 703.3297         | 352.1685        |           |                 | <b>685.3192</b>  | 343.1632         | 6  |
| 14 | <b>1529.8071</b> | 765.4072        | 1512.7805        | 756.9939        | 1511.7965      | 756.4019         | S    | 616.2977         | 308.6525        |           |                 | 598.2871         | <b>299.6472</b>  | 5  |
| 15 | <b>1642.8917</b> | 821.9492        | 1625.8646        | <b>813.4359</b> | 1624.8806      | <b>812.9439</b>  | I    | 529.2657         | 265.1365        |           |                 | 511.2551         | 256.1312         | 4  |
| 16 | <b>1729.9252</b> | 865.4652        | 1712.8966        | 856.9519        | 1711.9126      | 856.4599         | S    | 416.1816         | 208.5944        |           |                 | 398.1710         | 199.5892         | 3  |
| 17 | 1876.9916        | <b>938.9994</b> | 1859.9650        | <b>930.4861</b> | 1858.9810      | <b>929.9941</b>  | F    | 329.1496         | 165.0784        |           |                 |                  |                  | 2  |
| 18 |                  |                 |                  |                 | 182.0812       | 91.5442          | Y    |                  |                 |           |                 |                  |                  | 1  |

Match to Query 965: 886.527628 from(444.271090, 2+) intensity(2175662.0000)

Title: File1296 Spectrum11768 scans: 13420

Data file I:\2013-9-12-Hela-Prometh-Fri14-ZW.mgf

Click mouse within plot area to zoom in by factor of two about that point

Or,   to  Da Label all possible matches  Label matches used for scoring 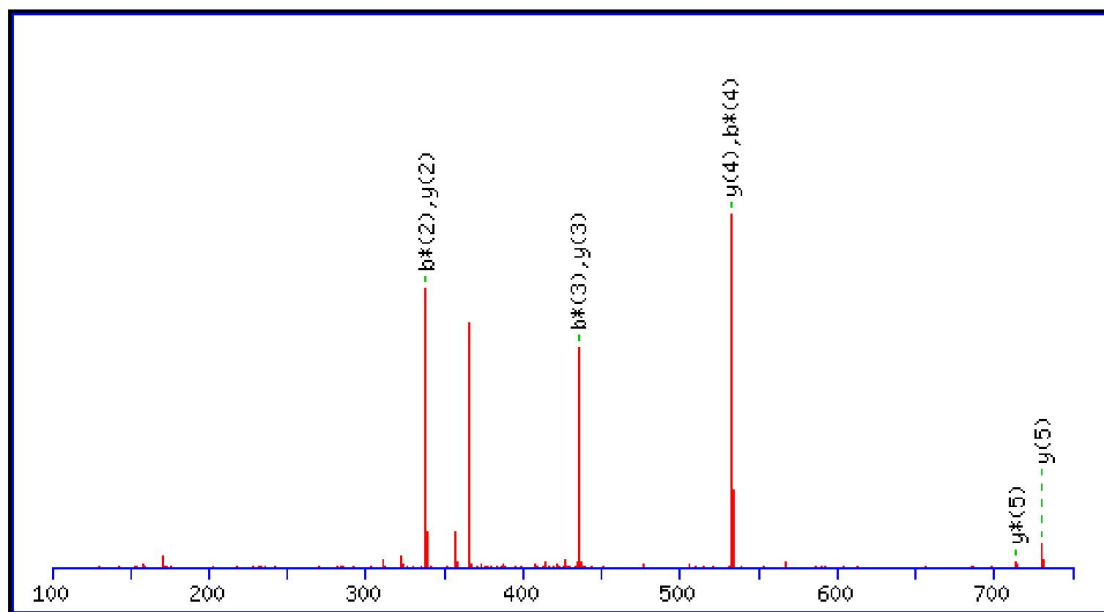**Monoisotopic mass of neutral peptide Mr(calc):** 885.5184**Fixed modifications:** Carbamidomethyl (C) (apply to specified residues or termini only)**Variable modifications:****K2** : Propionyl-Methylation (K)**Ions Score:** 33 **Expect:** 0.3**Matches :** 8/40 fragment ions using 7 most intense peaks ([help](#))

| # | b        | b <sup>++</sup> | b <sup>*</sup> | b <sup>++</sup> | Seq. | y        | y <sup>++</sup> | y <sup>*</sup> | y <sup>++</sup> | # |
|---|----------|-----------------|----------------|-----------------|------|----------|-----------------|----------------|-----------------|---|
| 1 | 157.1084 | 79.0578         | 140.0818       | 70.5446         | R    |          |                 |                |                 | 6 |
| 2 | 355.2452 | 178.1262        | 338.2187       | 169.6130        | K    | 730.4246 | 365.7160        | 713.3981       | 357.2027        | 5 |
| 3 | 452.2980 | 226.6526        | 435.2714       | 218.1394        | P    | 532.2878 | 266.6475        | 515.2613       | 258.1343        | 4 |
| 4 | 549.3507 | 275.1790        | 532.3242       | 266.6657        | P    | 435.2350 | 218.1212        | 418.2085       | 209.6079        | 3 |
| 5 | 712.4141 | 356.7107        | 695.3875       | 348.1974        | Y    | 338.1823 | 169.5948        | 321.1557       | 161.0815        | 2 |
| 6 |          |                 |                |                 | R    | 175.1190 | 88.0631         | 158.0924       | 79.5498         | 1 |

Found in **Q9Y2W1**, Thyroid hormone receptor-associated protein 3 OS=Homo sapiens GN=THRAP3 PE=1 SV=2

Match to Query 6270: 1553.942228 from(777.978390, 2+) intensity(118495.4531)

Title: File1296 Spectrum10409 scans: 12004

Data file I:\2013-9-12-Hela-Prometh-Fr14-ZW.mgf

Click mouse within plot area to zoom in by factor of two about that point

Or,   to  Da Label all possible matches  Label matches used for scoring 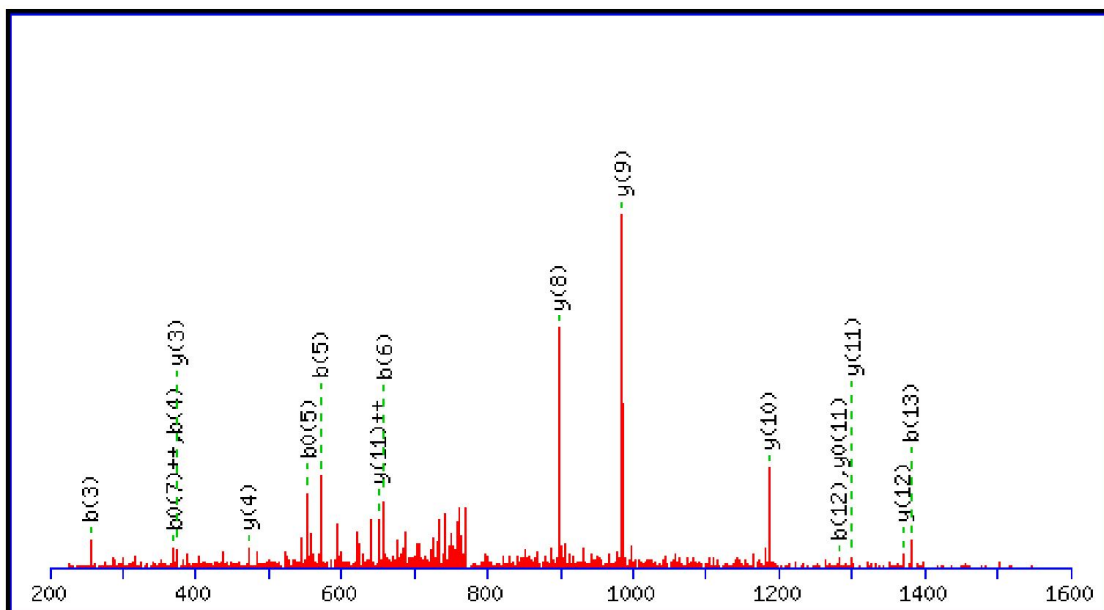Monoisotopic mass of neutral peptide **Mr(calc): 1553.9414**

Fixed modifications: Carbamidomethyl (C) (apply to specified residues)

Variable modifications:

**K5** : Propionyl-(13CD3)Methyl (K)

Ions Score: 47 Expect: 0.0064

Matches : 17/140 fragment ions using 27 most intense peaks [\(help\)](#)

| #  | b                | b <sup>++</sup> | b <sup>+</sup> | b <sup>++</sup> | b <sup>0</sup>  | b <sup>0++</sup> | Seq. | y                | y <sup>++</sup> | y <sup>+</sup> | y <sup>++</sup> | y <sup>0</sup>   | y <sup>0++</sup> | #  |
|----|------------------|-----------------|----------------|-----------------|-----------------|------------------|------|------------------|-----------------|----------------|-----------------|------------------|------------------|----|
| 1  | 88.0393          | 44.5233         |                |                 | 70.0287         | 35.5180          | S    |                  |                 |                |                 |                  |                  | 14 |
| 2  | 185.0921         | 93.0497         |                |                 | 167.0815        | 84.0444          | P    | 1467.9166        | 734.4619        | 1450.8901      | 725.9487        | 1449.9060        | 725.4567         | 13 |
| 3  | <b>256.1292</b>  | 128.5682        |                |                 | 238.1186        | 119.5629         | A    | <b>1370.8638</b> | 685.9356        | 1353.8373      | 677.4223        | 1352.8533        | 676.9303         | 12 |
| 4  | <b>369.2132</b>  | 185.1103        |                |                 | 351.2027        | 176.1050         | L    | <b>1299.8267</b> | 650.4170        | 1282.8002      | 641.9037        | <b>1281.8162</b> | 641.4117         | 11 |
| 5  | <b>571.3723</b>  | 286.1898        | 554.3457       | 277.6765        | <b>553.3617</b> | 277.1845         | K    | <b>1186.7427</b> | 593.8750        | 1169.7161      | 585.3617        | 1168.7321        | 584.8697         | 10 |
| 6  | <b>658.4043</b>  | 329.7058        | 641.3777       | 321.1925        | 640.3937        | 320.7005         | S    | <b>984.5837</b>  | 492.7955        | 967.5571       | 484.2822        | 966.5731         | 483.7902         | 9  |
| 7  | 755.4571         | 378.2322        | 738.4305       | 369.7189        | 737.4465        | 369.2269         | P    | <b>897.5516</b>  | 449.2795        | 890.5251       | 440.7662        | 879.5411         | 440.2742         | 8  |
| 8  | 868.5411         | 434.7742        | 851.5146       | 426.2609        | 850.5305        | 425.7689         | L    | 800.4989         | 400.7531        | 783.4723       | 392.2398        | 782.4883         | 391.7478         | 7  |
| 9  | 996.5997         | 498.8035        | 979.5731       | 490.2902        | 978.5891        | 489.7982         | Q    | 687.4148         | 344.2110        | 670.3883       | 335.6978        | 669.4042         | 335.2058         | 6  |
| 10 | 1083.6317        | 542.3195        | 1066.6052      | 533.8082        | 1065.6212       | 533.3142         | S    | 559.3562         | 280.1817        | 542.3297       | 271.6685        | 541.3457         | 271.1765         | 5  |
| 11 | 1182.7001        | 591.8537        | 1165.6736      | 583.3404        | 1164.6896       | 582.8484         | V    | <b>472.3242</b>  | 236.6657        | 455.2976       | 228.1525        |                  |                  | 4  |
| 12 | <b>1281.7685</b> | 641.3879        | 1264.7420      | 632.8746        | 1263.7580       | 632.3826         | V    | <b>373.2558</b>  | 187.1315        | 356.2292       | 178.6183        |                  |                  | 3  |
| 13 | <b>1380.8370</b> | 690.9221        | 1363.8104      | 682.4088        | 1362.8264       | 681.9168         | V    | 274.1874         | 137.5973        | 257.1608       | 129.0840        |                  |                  | 2  |
| 14 |                  |                 |                |                 |                 |                  | R    | 175.1190         | 88.0631         | 158.0924       | 79.5498         |                  |                  | 1  |

Match to Query 6306: 1560.834568 from(781.424560, 2+) intensity(101645.4922)

Title: File1296 Spectrum14241 scans: 15996

Data file I:\2013-9-12-Hela-Prometh-Fr14-ZW.mgf

Click mouse within plot area to zoom in by factor of two about that point

Or,   to  Da Label all possible matches  Label matches used for scoring 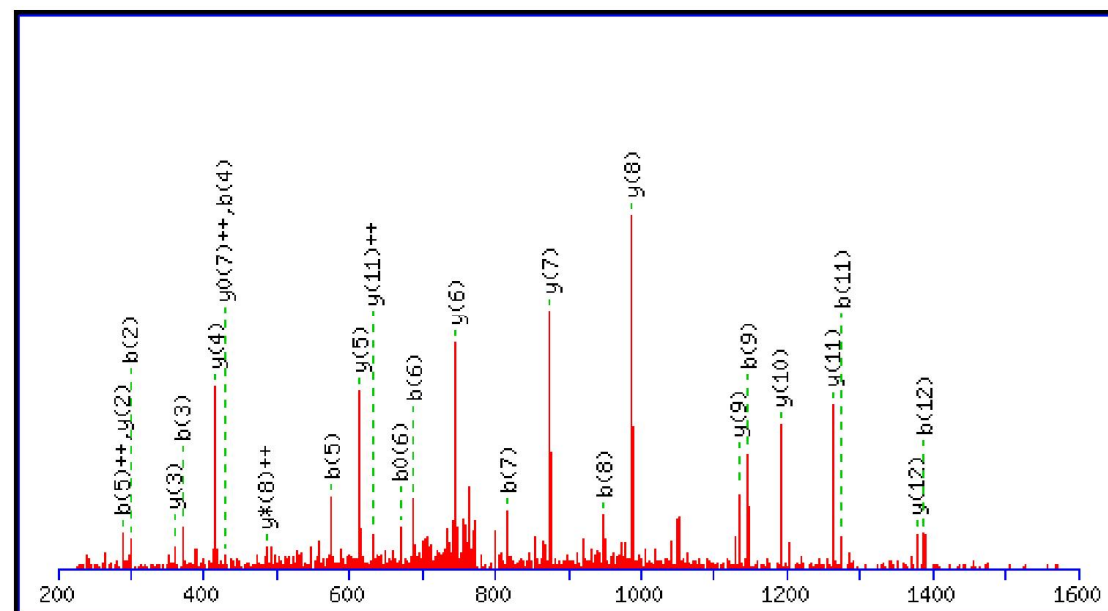**Monoisotopic mass of neutral peptide Mr(calc):** 1560.8334**Fixed modifications:** Carbamidomethyl (C) (apply to specified)**Variable modifications:****K1** : Propionyl (K)**K9** : Propionyl-Methylation (K)**Ions Score:** 78 **Expect:** 1.4e-005**Matches** : 26/130 fragment ions using 40 most intense peaks

| #  | b                | b <sup>++</sup> | b*        | b <sup>*++</sup> | b <sup>0</sup> | b <sup>0++</sup> | Seq. | y                | y <sup>++</sup> | y*        | y <sup>*++</sup> | y <sup>0</sup> | y <sup>0++</sup> | #  |
|----|------------------|-----------------|-----------|------------------|----------------|------------------|------|------------------|-----------------|-----------|------------------|----------------|------------------|----|
| 1  | 185.1285         | 93.0679         | 168.1019  | 84.5546          |                |                  | K    |                  |                 |           |                  |                |                  | 13 |
| 2  | <b>300.1554</b>  | 150.5813        | 283.1288  | 142.0681         | 282.1448       | 141.5761         | D    | <b>1377.7195</b> | 639.3634        | 1360.6929 | 680.8501         | 1359.7089      | 680.3581         | 12 |
| 3  | <b>371.1925</b>  | 186.0999        | 354.1660  | 177.5866         | 353.1819       | 177.0946         | A    | <b>1262.6926</b> | 631.8499        | 1245.6660 | 623.3366         | 1244.6820      | 622.8446         | 11 |
| 4  | <b>428.2140</b>  | 214.6106        | 411.1874  | 206.0974         | 410.2034       | 205.6053         | G    | <b>1191.6554</b> | 596.3314        | 1174.6289 | 587.8181         | 1173.6449      | 587.3261         | 10 |
| 5  | <b>575.2824</b>  | <b>288.1448</b> | 558.2558  | 279.6316         | 557.2718       | 279.1396         | F    | <b>1134.6340</b> | 567.8206        | 1117.6074 | 559.3074         | 1116.6234      | 558.8153         | 9  |
| 6  | <b>688.3665</b>  | 344.6889        | 671.3399  | 336.1736         | 670.3559       | 335.6816         | L    | <b>987.5656</b>  | 494.2864        | 970.5390  | 485.7731         | 969.5550       | 485.2311         | 8  |
| 7  | <b>817.4090</b>  | 409.2082        | 800.3825  | 400.6949         | 799.3985       | 400.2029         | E    | <b>874.4815</b>  | 437.7444        | 857.4550  | 429.2311         | 856.4709       | <b>428.7391</b>  | 7  |
| 8  | <b>948.4495</b>  | 474.7284        | 931.4230  | 466.2151         | 930.4390       | 465.7231         | I    | <b>745.4389</b>  | 373.2231        | 728.4124  | 364.7098         |                |                  | 6  |
| 9  | <b>1146.5864</b> | 573.7968        | 1129.5598 | 565.2835         | 1128.5758      | 564.7915         | K    | <b>614.3984</b>  | 307.7028        | 597.3719  | 299.1896         |                |                  | 5  |
| 10 | 1203.6078        | 602.3075        | 1186.5813 | 593.7943         | 1185.5973      | 593.3023         | G    | <b>416.2616</b>  | 208.6344        | 399.2350  | 200.1212         |                |                  | 4  |
| 11 | <b>1274.6449</b> | 637.8261        | 1257.6184 | 629.3128         | 1256.6344      | 628.8208         | A    | <b>359.2401</b>  | 180.1237        | 342.2136  | 171.6104         |                |                  | 3  |
| 12 | <b>1387.7290</b> | 694.3681        | 1370.7025 | 685.8549         | 1369.7184      | 685.3629         | L    | <b>288.2030</b>  | 144.6051        | 271.1765  | 136.0919         |                |                  | 2  |
| 13 |                  |                 |           |                  |                |                  | R    | 175.1190         | 88.0631         | 158.0924  | 79.5498          |                |                  | 1  |

Found in **Q2TAL8**, Glutamine-rich protein 1 OS=Homo sapiens GN=QRICH1 PE=1 SV=1

Match to Query 8301: 1507.909268 from(754.961910, 2+) intensity(45624.3164)

Title: File1264 Spectrum9247 scans: 10947

Data file I:\2013-9-5-Hela-Prometh-Fr13-ZW.mgf

Click mouse within plot area to zoom in by factor of two about that point

Or,   to  Da

Label all possible matches  Label matches used for scoring

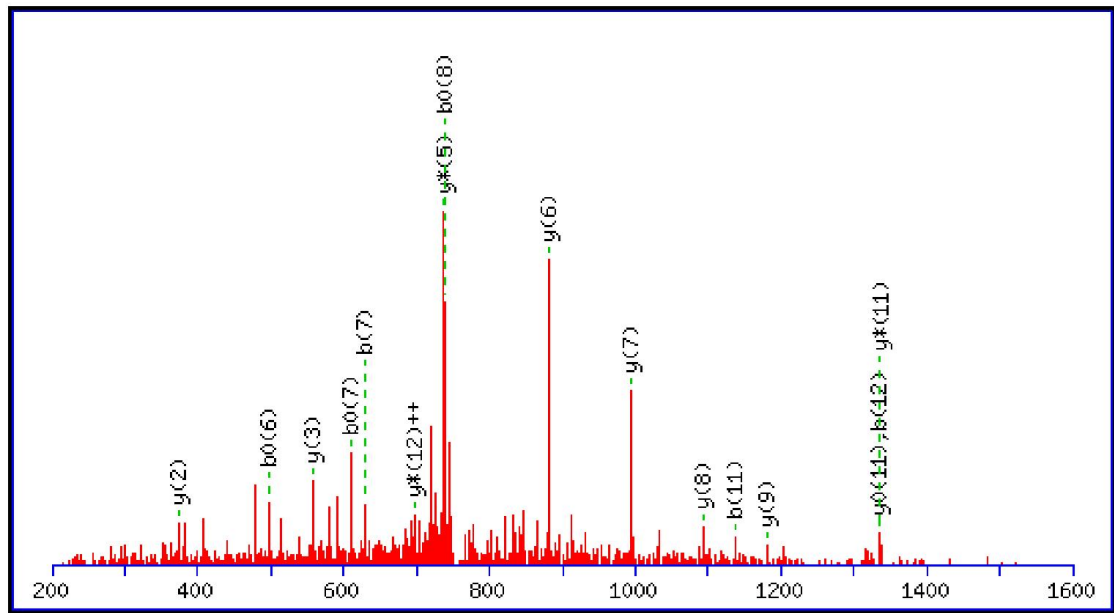

**Monoisotopic mass of neutral peptide Mr(calc): 1507.9086**

**Fixed modifications:** Carbamidomethyl (C) (apply to specified residues)

**Variable modifications:**

**K11** : Propionyl (K)

**K12** : Propionyl-Methylation (K)

**Ions Score:** 31 **Expect:** 0.3

**Matches** : 16/110 fragment ions using 26 most intense peaks

| #  | b         | b <sup>++</sup> | b <sup>+</sup> | b <sup>++</sup> | b <sup>0</sup> | b <sup>0++</sup> | Seq. | y         | y <sup>++</sup> | y <sup>+</sup> | y <sup>++</sup> | y <sup>0</sup> | y <sup>0++</sup> | #  |
|----|-----------|-----------------|----------------|-----------------|----------------|------------------|------|-----------|-----------------|----------------|-----------------|----------------|------------------|----|
| 1  | 100.0757  | 50.5415         |                |                 |                |                  | V    |           |                 |                |                 |                |                  | 13 |
| 2  | 157.0972  | 79.0522         |                |                 |                |                  | G    | 1409.8475 | 705.4274        | 1392.8209      | 696.9141        | 1391.8369      | 696.4221         | 12 |
| 3  | 258.1448  | 129.5761        |                |                 | 240.1343       | 120.5708         | T    | 1352.8250 | 676.9166        | 1335.7995      | 668.4034        | 1334.8154      | 667.9114         | 11 |
| 4  | 329.1819  | 165.0946        |                |                 | 311.1714       | 156.0893         | A    | 1251.7783 | 626.3928        | 1234.7518      | 617.8795        | 1233.7678      | 617.3875         | 10 |
| 5  | 416.2140  | 208.6106        |                |                 | 398.2034       | 199.6053         | S    | 1180.7418 | 590.8742        | 1163.7147      | 582.3610        | 1162.7307      | 581.8690         | 9  |
| 6  | 515.2824  | 258.1448        |                |                 | 497.2718       | 249.1395         | V    | 1093.7092 | 547.3582        | 1076.6826      | 538.8450        |                |                  | 8  |
| 7  | 628.3665  | 314.6869        |                |                 | 610.3859       | 305.6816         | L    | 994.6408  | 497.8240        | 977.6142       | 489.3108        |                |                  | 7  |
| 8  | 756.4250  | 378.7162        | 739.3985       | 370.2029        | 738.4145       | 369.7109         | Q    | 881.5567  | 441.2820        | 864.5302       | 432.7687        |                |                  | 6  |
| 9  | 853.4778  | 427.2425        | 836.4512       | 418.7293        | 835.4672       | 418.2373         | P    | 753.4981  | 377.2527        | 736.4716       | 368.7394        |                |                  | 5  |
| 10 | 952.5462  | 476.7767        | 935.5197       | 468.2635        | 934.5356       | 467.7715         | V    | 656.4454  | 328.7263        | 639.4188       | 320.2130        |                |                  | 4  |
| 11 | 1136.6674 | 568.8373        | 1119.6408      | 560.3241        | 1118.6568      | 559.8320         | K    | 557.3770  | 279.1921        | 540.3504       | 270.6788        |                |                  | 3  |
| 12 | 1334.8042 | 667.9057        | 1317.7777      | 659.3925        | 1316.7936      | 658.9005         | K    | 373.2558  | 187.1315        | 356.2292       | 178.6183        |                |                  | 2  |
| 13 |           |                 |                |                 |                |                  | R    | 175.1190  | 88.0631         | 158.0924       | 79.5498         |                |                  | 1  |

Match to Query 5785: 1411.814188 from(706.914370, 2+) intensity(23202.8145)

Title: File1278\_Spectrum3656 scans: 5066

Data file I:\2013-9-12-Hela-Prometh-Fr12-ZW.mgf

Click mouse within plot area to zoom in by factor of two about that point

Or,   to  Da Label all possible matches  Label matches used for scoring 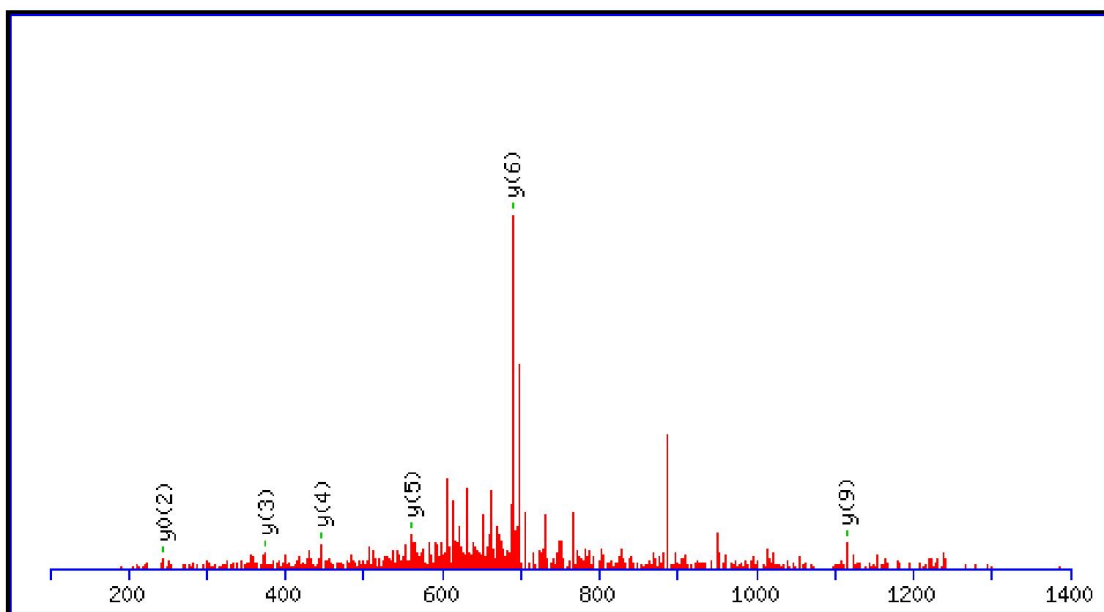Monoisotopic mass of neutral peptide **Mr(calc): 1410.8194**

Fixed modifications: Carbamidomethyl (C) (apply to specified residues or termini only)

Variable modifications:

**K1** : Propionyl (K)**K3** : Propionyl-Methylation (K)

Ions Score: 27 Expect: 1.3

Matches : 6/108 fragment ions using 12 most intense peak:

| #         | b         | b <sup>++</sup> | b <sup>+</sup> | b <sup>+++</sup> | b <sup>0</sup> | b <sup>0++</sup> | Seq.     | y                | y <sup>++</sup> | y <sup>*</sup> | y <sup>+++</sup> | y <sup>0</sup>  | y <sup>0++</sup> | #         |
|-----------|-----------|-----------------|----------------|------------------|----------------|------------------|----------|------------------|-----------------|----------------|------------------|-----------------|------------------|-----------|
| <b>1</b>  | 185.1285  | 93.0679         | 168.1019       | 84.5546          |                |                  | <b>K</b> |                  |                 |                |                  |                 |                  | <b>11</b> |
| <b>2</b>  | 298.2125  | 149.6099        | 281.1860       | 141.0966         |                |                  | <b>L</b> | 1227.7056        | 614.3564        | 1210.6790      | 605.8431         | 1209.6950       | 605.3511         | <b>10</b> |
| <b>3</b>  | 496.3493  | 248.6783        | 479.3228       | 240.1650         |                |                  | <b>K</b> | <b>1114.6215</b> | 557.8144        | 1097.5949      | 549.3011         | 1096.6109       | 548.8091         | <b>9</b>  |
| <b>4</b>  | 609.4334  | 305.2203        | 592.4069       | 296.7071         |                |                  | <b>L</b> | 916.4847         | 458.7460        | 899.4581       | 450.2327         | 898.4741        | 449.7407         | <b>8</b>  |
| <b>5</b>  | 723.4763  | 362.2418        | 706.4493       | 353.7285         |                |                  | <b>N</b> | 803.4006         | 402.2039        | 786.3741       | 393.6907         | 785.3900        | 393.1987         | <b>7</b>  |
| <b>6</b>  | 852.5189  | 426.7631        | 835.4924       | 418.2498         | 834.5084       | 417.7578         | <b>E</b> | <b>689.3577</b>  | 345.1825        | 672.3311       | 336.6692         | 671.3471        | 336.1772         | <b>6</b>  |
| <b>7</b>  | 966.5619  | 483.7846        | 949.5353       | 475.2713         | 948.5513       | 474.7793         | <b>N</b> | <b>560.3151</b>  | 280.6612        | 543.2885       | 272.1479         | 542.3045        | 271.6559         | <b>5</b>  |
| <b>8</b>  | 1037.5990 | 519.3031        | 1020.5724      | 510.7898         | 1019.5884      | 510.2978         | <b>A</b> | <b>446.2722</b>  | 223.6397        | 429.2456       | 215.1264         | 428.2616        | 214.6344         | <b>4</b>  |
| <b>9</b>  | 1150.6830 | 575.8452        | 1133.6565      | 567.3319         | 1132.6725      | 566.8399         | <b>I</b> | <b>375.2350</b>  | 188.1212        | 368.2085       | 179.6079         | 367.2245        | 179.1159         | <b>3</b>  |
| <b>10</b> | 1237.7151 | 619.3612        | 1220.6885      | 610.8479         | 1219.7045      | 610.3559         | <b>S</b> | 262.1510         | 131.5791        | 245.1244       | 123.0659         | <b>244.1404</b> | 122.5738         | <b>2</b>  |
| <b>11</b> |           |                 |                |                  |                |                  | <b>R</b> | 175.1190         | 88.0631         | 158.0924       | 79.5498          |                 |                  |           |



MS/MS Fragmentation of **KAGLGKEKR**Found in **Q8IY81**, pre-rRNA processing protein FTSJ3 OS=Homo sapiens GN=FTSJ3 PE=1 SV=2

Match to Query 3369: 1171.719088 from(586.866820, 2+) intensity(80811.5703)

Title: File1278 Spectrum8690 scans: 10333

Data file I:\2013-9-12-Hela-Prometh-Fr12-ZW.mgf

Click mouse within plot area to zoom in by factor of two about that point

Or,   to  Da Label all possible matches  Label matches used for scoring 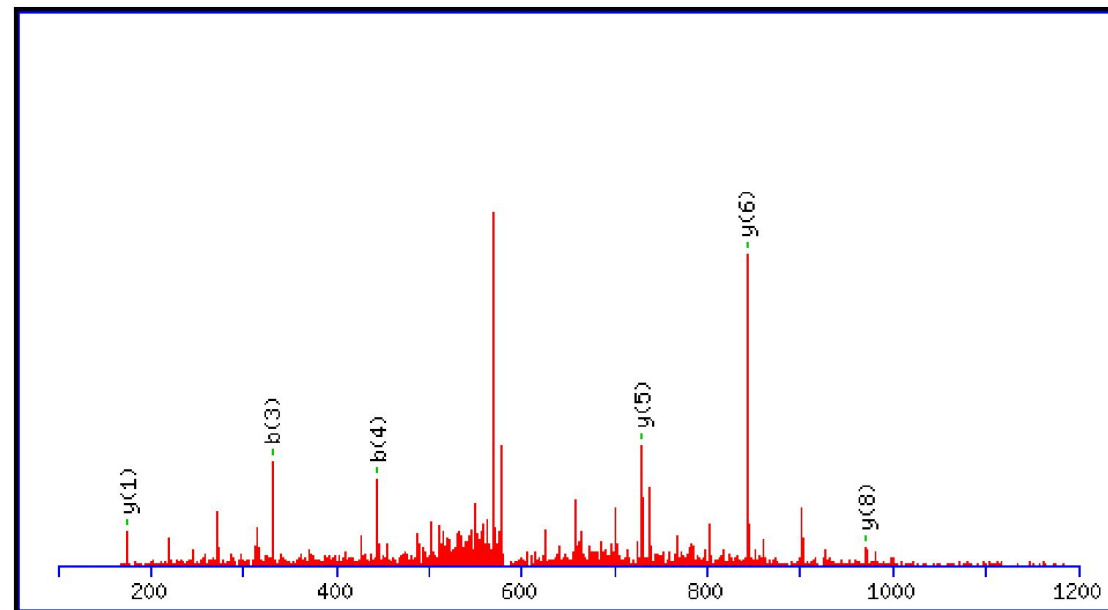**Monoisotopic mass of neutral peptide Mr(calc):** 1171.7197**Fixed modifications:** Carbamidomethyl (C) (apply to specified residues or termini only)**Variable modifications:****K1** : Propionyl-(13CD3)Methyl (K)**K6** : Propionyl (K)**K8** : Propionyl (K)**Ions Score:** 25 **Expect:** 1.2**Matches** : 6/80 fragment ions using 10 most intense

| # | b               | b <sup>++</sup> | b <sup>*</sup> | b <sup>*++</sup> | b <sup>0</sup> | b <sup>0++</sup> | Seq. | y               | y <sup>++</sup> | y <sup>*</sup> | y <sup>*++</sup> | y <sup>0</sup> | y <sup>0++</sup> | # |
|---|-----------------|-----------------|----------------|------------------|----------------|------------------|------|-----------------|-----------------|----------------|------------------|----------------|------------------|---|
| 1 | 203.1663        | 102.0868        | 186.1397       | 93.5735          |                |                  | K    |                 |                 |                |                  |                |                  | 9 |
| 2 | 274.2034        | 137.6053        | 257.1769       | 129.0921         |                |                  | A    | <b>970.5680</b> | 485.7876        | 953.5415       | 477.2744         | 952.5574       | 476.7824         | 8 |
| 3 | <b>331.2249</b> | 166.1161        | 314.1983       | 157.6028         |                |                  | G    | 899.5309        | 450.2691        | 882.5043       | 441.7558         | 881.5203       | 441.2638         | 7 |
| 4 | <b>444.3089</b> | 222.6581        | 427.2824       | 214.1448         |                |                  | L    | <b>842.5094</b> | 421.7584        | 825.4829       | 413.2451         | 824.4989       | 412.7531         | 6 |
| 5 | 501.3304        | 251.1688        | 484.3038       | 242.6556         |                |                  | G    | <b>729.4254</b> | 365.2163        | 712.3988       | 356.7030         | 711.4148       | 356.2110         | 5 |
| 6 | 685.4516        | 343.2294        | 668.4250       | 334.7162         |                |                  | K    | 672.4039        | 336.7056        | 655.3774       | 328.1923         | 654.3933       | 327.7003         | 4 |
| 7 | 814.4942        | 407.7507        | 797.4676       | 399.2374         | 796.4836       | 398.7454         | E    | 488.2827        | 244.6450        | 471.2562       | 236.1317         | 470.2722       | 235.6397         | 3 |
| 8 | 998.6153        | 499.8113        | 981.5888       | 491.2980         | 980.6048       | 490.8060         | K    | 359.2401        | 180.1237        | 342.2136       | 171.6104         |                |                  | 2 |
| 9 |                 |                 |                |                  |                |                  | R    | <b>175.1190</b> | 88.0631         | 158.0924       | 79.5498          |                |                  | 1 |

MS/MS Fragmentation of **IAKGLR**Found in **P47914**, 60S ribosomal protein L29 OS=Homo sapiens GN=RPL29 PE=1 SV=2

Match to Query 87: 726.475448 from(364.245000, 2+) intensity(39742.9180)

Title: File1278 Spectrum4972 scans: 6460

Data file I:\2013-9-12-Hela-Prometh-Fr12-ZW.mgf

Click mouse within  Not area to zoom in by factor of two about that pointOr,   to  Da Label all possible matches  Label matches used for scoring 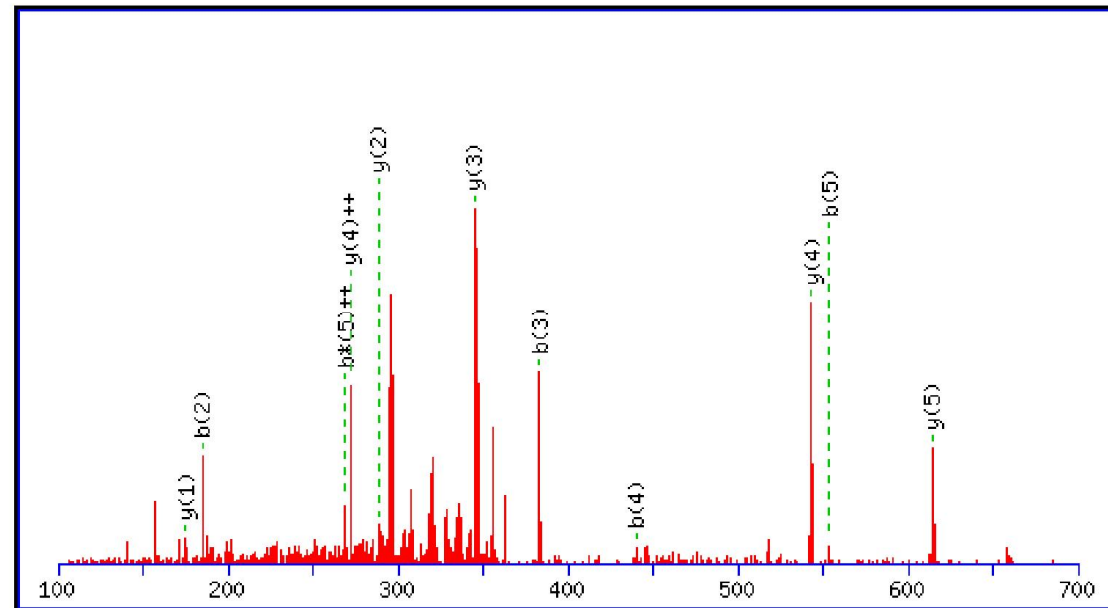**Monoisotopic mass of neutral peptide Mr(calc):** 726.4752**Fixed modifications:** Carbamidomethyl (C) (apply to specified residues or termini only)**Variable modifications:****K3** : Propionyl-Methylation (K)**Ions Score:** 22 **Expect:** 1.8**Matches** : 11/36 fragment ions using 36 most intense peaks ([help](#))

| # | b               | b <sup>++</sup> | b*       | b <sup>++</sup> | Seq. | y               | y <sup>++</sup> | y*       | y <sup>++</sup> | # |
|---|-----------------|-----------------|----------|-----------------|------|-----------------|-----------------|----------|-----------------|---|
| 1 | 114.0913        | 57.5493         |          |                 | I    |                 |                 |          |                 | 6 |
| 2 | <b>185.1285</b> | 93.0673         |          |                 | A    | <b>614.3984</b> | 307.7028        | 597.3719 | 299.1896        | 5 |
| 3 | <b>383.2653</b> | 192.1363        | 366.2387 | 183.6230        | K    | <b>543.3613</b> | <b>272.1843</b> | 526.3348 | 263.6710        | 4 |
| 4 | <b>440.2867</b> | 220.6470        | 423.2602 | 212.1337        | G    | <b>345.2245</b> | 173.1159        | 328.1979 | 164.6026        | 3 |
| 5 | <b>553.3708</b> | 277.1890        | 536.3443 | <b>268.6758</b> | L    | <b>288.2030</b> | 144.6051        | 271.1765 | 136.0919        | 2 |
| 6 |                 |                 |          |                 | R    | <b>175.1190</b> | 88.0631         | 158.0924 | 79.5498         | 1 |

MS/MS Fragmentation of **AVKVKHVKR**Found in **K7EKZ6**, CpG-binding protein (Fragment) OS=Homo sapiens GN=CXXC1 PE=4 SV=1

Match to Query 4018: 1249.813208 from(625.913880, 2+) intensity(58710.2109)

Title: File1278 Spectrum4946 scans: 6433

Data file I:\2013-9-12-Hela-Prometh-Fr12-ZW.mgf

Click mouse within plot area to zoom in by factor of two about that point

Or,   to  Da Label all possible matches  Label matches used for scoring 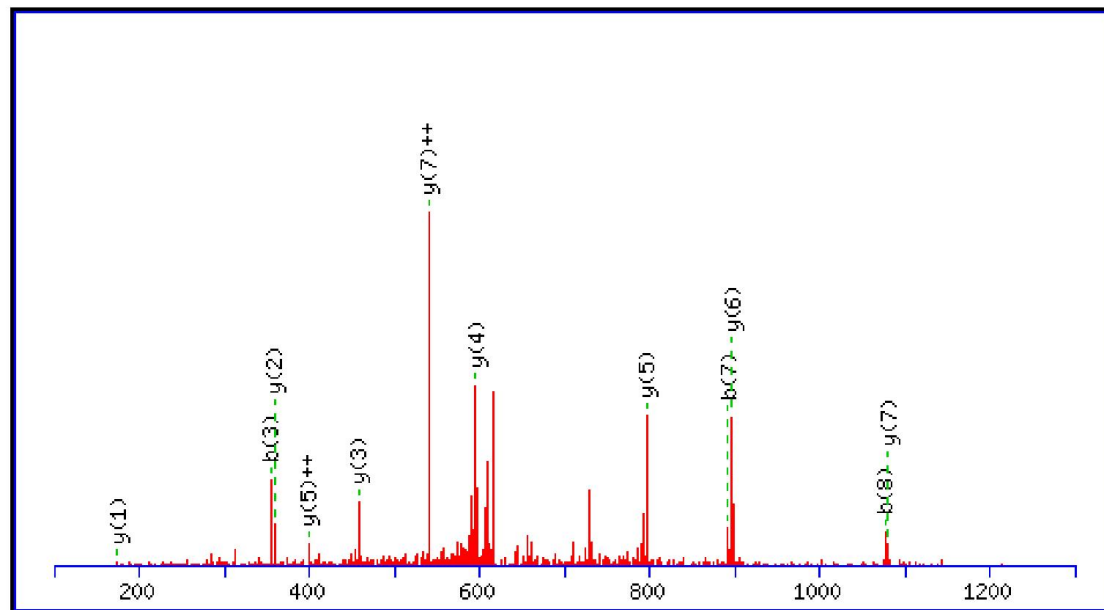**Monoisotopic mass of neutral peptide Mr(calc):** 1249.8143**Fixed modifications:** Carbamidomethyl (C) (apply to specified residues or**Variable modifications:****K3** : Propionyl (K)**K5** : Propionyl-(13CD3)Methyl (K)**K8** : Propionyl (K)**Ions Score:** 35 **Expect:** 0.029**Matches** : 12/60 fragment ions using 31 most intense peaks ([help](#))

| # | b                | b <sup>++</sup> | b*        | b <sup>++</sup> | Seq. | y                | y <sup>++</sup> | y*        | y <sup>++</sup> | # |
|---|------------------|-----------------|-----------|-----------------|------|------------------|-----------------|-----------|-----------------|---|
| 1 | 72.0444          | 36.5258         |           |                 | A    |                  |                 |           |                 | 9 |
| 2 | 171.1128         | 86.5600         |           |                 | V    | 1179.7845        | 590.3959        | 1162.7579 | 581.8826        | 8 |
| 3 | <b>355.2340</b>  | 178.1206        | 338.2074  | 169.6074        | K    | <b>1080.7161</b> | <b>540.8617</b> | 1063.6895 | 532.3484        | 7 |
| 4 | 454.3024         | 227.6548        | 437.2758  | 219.1416        | V    | <b>896.5949</b>  | 448.8011        | 879.5683  | 440.2878        | 6 |
| 5 | 656.4614         | 328.7343        | 639.4349  | 320.2211        | K    | <b>797.5265</b>  | <b>399.2669</b> | 780.4999  | 390.7536        | 5 |
| 6 | 793.5203         | 397.2638        | 776.4938  | 388.7505        | H    | <b>595.3675</b>  | 298.1874        | 578.3409  | 289.6741        | 4 |
| 7 | <b>892.5887</b>  | 446.7980        | 875.5622  | 438.2847        | V    | <b>458.3085</b>  | 229.6579        | 441.2820  | 221.1446        | 3 |
| 8 | <b>1076.7099</b> | 538.8586        | 1059.6834 | 530.3453        | K    | <b>359.2407</b>  | 180.1237        | 342.2136  | 171.6104        | 2 |
| 9 |                  |                 |           |                 | R    | <b>175.1190</b>  | 88.0631         | 158.0924  | 79.5498         | 1 |

Match to Query 15645: 2480.235448 from(1241.125000,2+) intensity(43261.8477)

Title: File1278 Spectrum16732 scans: 18710

Data file I:\2013-9-12-Hela-Prometh-Fr12-ZW.mgf

Click mouse within plot area to zoom in by factor of two about that point

Or,   to  Da Label all possible matches  Label matches used for scoring 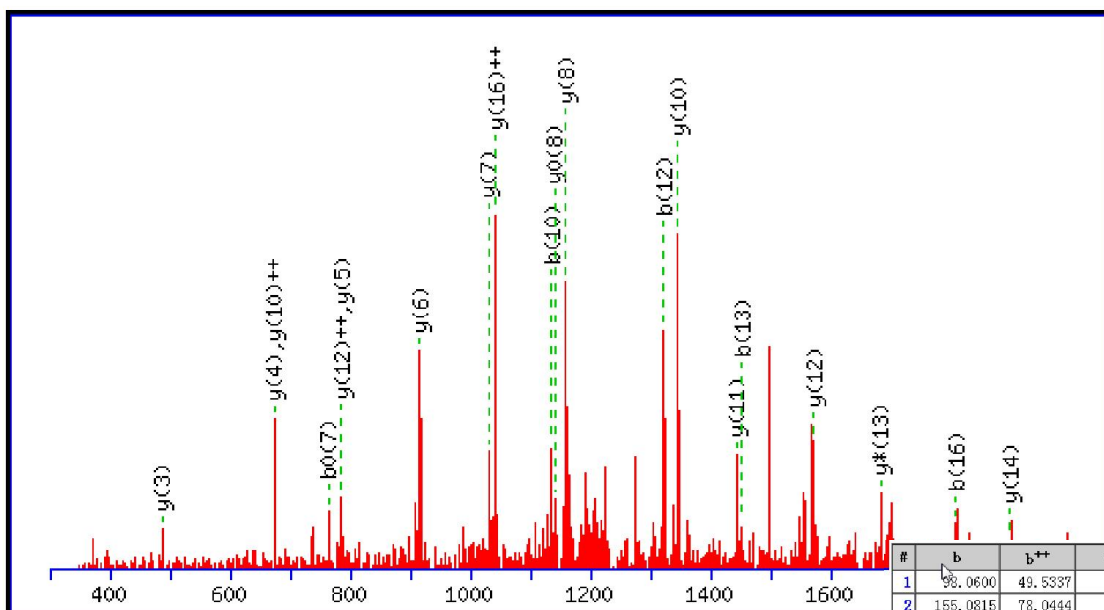

Monoisotopic mass of neutral peptide Mr(calc): 2480.2336

Fixed modifications: Carbamidomethyl (C) (apply to specified

Variable modifications:

K7 : Propionyl-Methylation (K)

K18 : Propionyl (K)

Ions Score: 51 Expect: 0.011

Matches : 20/196 fragment ions using 34 most intense peaks

| #  | b         | b <sup>++</sup> | b <sup>+</sup> | b <sup>+</sup> + | b <sup>0</sup> | b <sup>0</sup> + | Seq. | y         | y <sup>++</sup> | y <sup>+</sup> | y <sup>+</sup> + | y <sup>0</sup> | y <sup>0</sup> + | #  |
|----|-----------|-----------------|----------------|------------------|----------------|------------------|------|-----------|-----------------|----------------|------------------|----------------|------------------|----|
| 1  | 98.0600   | 49.5337         |                |                  |                |                  | P    |           |                 |                |                  |                |                  | 20 |
| 2  | 155.0815  | 78.0444         |                |                  |                |                  | G    | 2384.1881 | 1192.5977       | 2367.1616      | 1184.0844        | 2366.1775      | 1183.5924        | 19 |
| 3  | 252.1343  | 126.5708        |                |                  |                |                  | P    | 2327.1666 | 1164.0870       | 2310.1401      | 1155.5737        | 2309.1561      | 1155.0817        | 18 |
| 4  | 399.2027  | 200.1050        |                |                  |                |                  | F    | 2230.1139 | 1115.5606       | 2213.0873      | 1107.0473        | 2212.1033      | 1106.5553        | 17 |
| 5  | 496.2554  | 248.6314        |                |                  |                |                  | P    | 2083.0455 | 1042.0264       | 2066.0189      | 1033.5131        | 2065.0349      | 1033.0211        | 16 |
| 6  | 583.2875  | 292.1474        |                |                  | 565.2769       | 283.1421         | S    | 1985.9927 | 993.5000        | 1968.9661      | 984.9867         | 1967.9821      | 984.4947         | 15 |
| 7  | 781.4243  | 391.2158        | 764.3978       | 382.7025         | 763.4137       | 382.2105         | K    | 1898.9607 | 949.9840        | 1881.9341      | 941.4707         | 1880.9501      | 940.9787         | 14 |
| 8  | 909.4829  | 455.2451        | 892.4563       | 446.7318         | 891.4723       | 446.2398         | Q    | 1700.8238 | 850.9156        | 1683.7973      | 842.4023         | 1682.8133      | 841.9103         | 13 |
| 9  | 1037.5415 | 519.2744        | 1020.5149      | 510.7611         | 1019.5309      | 510.2691         | Q    | 1573.7653 | 786.8863        | 1555.7387      | 778.3730         | 1554.7547      | 777.8810         | 12 |
| 10 | 1136.6099 | 568.8086        | 1119.5833      | 560.2953         | 1118.5993      | 559.8033         | V    | 1444.7067 | 722.8570        | 1427.6801      | 714.3437         | 1426.6961      | 713.8517         | 11 |
| 11 | 1207.6470 | 604.3271        | 1190.6204      | 595.8139         | 1189.6364      | 595.3218         | A    | 1345.6383 | 673.3228        | 1328.6117      | 664.8095         | 1327.6277      | 664.3175         | 10 |
| 12 | 1322.6739 | 661.8406        | 1305.6474      | 653.3273         | 1304.6634      | 652.8353         | D    | 1274.6012 | 637.8042        | 1257.5746      | 629.2909         | 1256.5906      | 628.7989         | 9  |
| 13 | 1451.7165 | 726.3619        | 1434.6900      | 717.8486         | 1433.7060      | 717.3566         | E    | 1159.5742 | 580.2907        | 1142.5477      | 571.7775         | 1141.5636      | 571.2855         | 8  |
| 14 | 1566.7435 | 783.8754        | 1549.7169      | 775.3621         | 1548.7329      | 774.8701         | D    | 1030.5316 | 515.7694        | 1013.5051      | 507.2562         | 1012.5211      | 506.7642         | 7  |
| 15 | 1695.7861 | 848.3967        | 1678.7595      | 839.8834         | 1677.7755      | 839.3914         | E    | 915.5047  | 458.2560        | 898.4781       | 449.7427         | 897.4941       | 449.2507         | 6  |
| 16 | 1808.8701 | 904.9387        | 1791.8436      | 896.4254         | 1790.8596      | 895.9334         | I    | 786.4621  | 393.7347        | 769.4355       | 385.2214         |                |                  | 5  |
| 17 | 1994.9494 | 997.9784        | 1977.9229      | 989.4651         | 1976.9389      | 988.9731         | W    | 673.3780  | 337.1926        | 656.3515       | 328.6794         |                |                  | 4  |
| 18 | 2179.0706 | 1090.0389       | 2162.0441      | 1081.5257        | 2161.0600      | 1081.0337        | K    | 487.2987  | 244.1530        | 470.2722       | 235.6397         |                |                  | 3  |
| 19 | 2307.1292 | 1154.0682       | 2290.1026      | 1145.5550        | 2289.1186      | 1145.0630        | Q    | 303.1775  | 152.0924        | 286.1510       | 143.5791         |                |                  | 2  |
| 20 |           |                 |                |                  |                |                  | R    | 175.1190  | 88.0631         | 158.0924       | 79.5498          |                |                  | 1  |

Match to Query 5896: 1421.765968 from(711.890260, 2+) intensity(48765.4180)

Title: File1278 Spectrum8466 scans: 10100

Data file I:\2013-9-12-Hela-Prometh-Fr12-ZW.mgf

Click mouse within plot area to zoom in by factor of two about that point

Or,   to  Da Label all possible matches  Label matches used for scoring 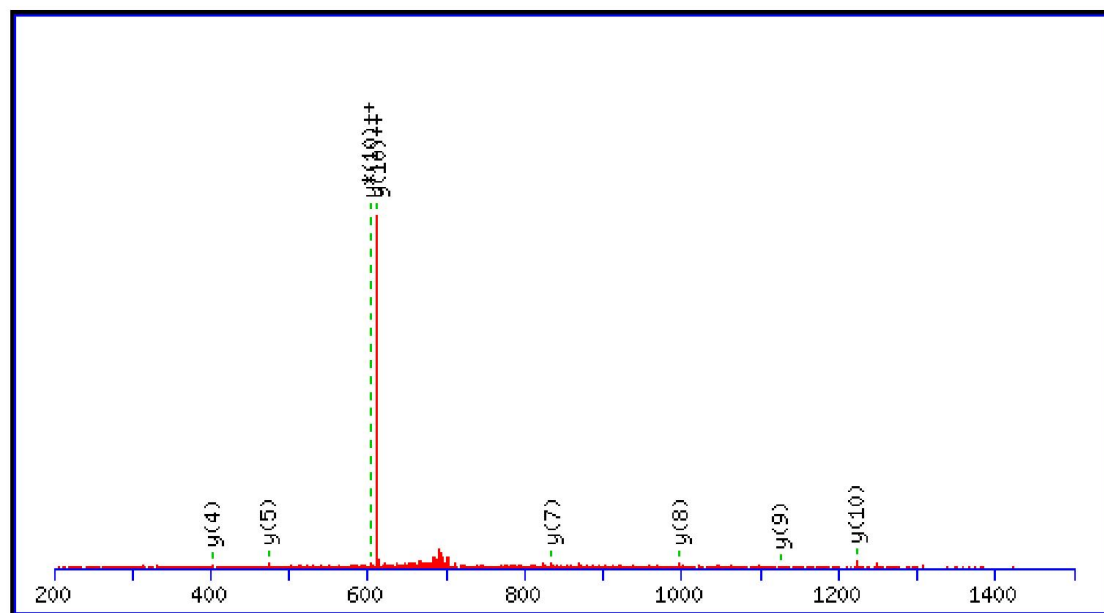**Monoisotopic mass of neutral peptide Mr(calc):** 1421.7667**Fixed modifications:** Carbamidomethyl (C) (apply to specified residues or**Variable modifications:****K6** : Propionyl-Methylation (K)**Ions Score:** 38 **Expect:** 0.13**Matches** : 8/104 fragment ions using 13 most intense peaks ([help](#))

| #  | b         | b <sup>++</sup> | b <sup>+</sup> | b <sup>+++</sup> | b <sup>0</sup> | b <sup>0++</sup> | Seq. | y                | y <sup>++</sup> | y <sup>+</sup> | y <sup>+++</sup> | #  |
|----|-----------|-----------------|----------------|------------------|----------------|------------------|------|------------------|-----------------|----------------|------------------|----|
| 1  | 102.0550  | 51.5311         |                |                  | 84.0444        | 42.5258          | T    |                  |                 |                |                  | 12 |
| 2  | 201.1234  | 101.0653        |                |                  | 183.1128       | 92.0600          | V    | 1321.7263        | 661.3668        | 1304.6998      | 652.8535         | 11 |
| 3  | 298.1761  | 149.5917        |                |                  | 280.1856       | 140.5864         | P    | <b>1222.6579</b> | <b>611.8326</b> | 1205.6313      | <b>603.3193</b>  | 10 |
| 4  | 426.2347  | 213.6210        | 409.2082       | 205.1077         | 408.2241       | 204.6157         | Q    | <b>1125.6051</b> | 563.3062        | 1108.5786      | 554.7929         | 9  |
| 5  | 589.2980  | 295.1527        | 572.2715       | 286.6394         | 571.2875       | 286.1474         | Y    | <b>997.5465</b>  | 499.2769        | 980.5200       | 490.7636         | 8  |
| 6  | 787.4349  | 394.2211        | 770.4083       | 385.7078         | 769.4243       | 385.2158         | K    | <b>834.4839</b>  | 417.7452        | 817.4567       | 409.2320         | 7  |
| 7  | 950.4982  | 475.7527        | 933.4716       | 467.2395         | 932.4876       | 466.7475         | Y    | 636.3464         | 318.6768        | 619.3198       | 310.1636         | 6  |
| 8  | 1021.5353 | 511.2713        | 1004.5088      | 502.7580         | 1003.5247      | 502.2660         | A    | <b>473.2831</b>  | 237.1452        | 456.2565       | 228.6319         | 5  |
| 9  | 1092.5724 | 546.7899        | 1075.5459      | 538.2766         | 1074.5619      | 537.7846         | A    | <b>402.2459</b>  | 201.6266        | 385.2194       | 193.1133         | 4  |
| 10 | 1149.5939 | 575.3006        | 1132.5673      | 566.7873         | 1131.5833      | 566.2953         | G    | 331.2088         | 166.1081        | 314.1823       | 157.5948         | 3  |
| 11 | 1248.6623 | 624.8348        | 1231.6358      | 616.3215         | 1230.6517      | 615.8295         | V    | 274.1874         | 137.5973        | 257.1608       | 129.0840         | 2  |
| 12 |           |                 |                |                  |                |                  | R    | 175.1190         | 88.0631         | 158.0924       | 79.5498          | 1  |

MS/MS Fragmentation of **KAAKAGGTPR**

Found in **P16403**, Histone H1.2 OS=Homo sapiens GN=HIST1H1C PE=1 SV=2

Match to Query 4254: 1266.748028 from(634.381290,2+) intensity(13867.1797)

Title: File1278 Spectrum3549 scans: 4947

Data file I:\2013-9-12-Hela-Prometh-Fr12-ZW.mgf

Click mouse within plot area to zoom in by factor of two about that point

Or,   to  Da

Label all possible matches  Label matches used for scoring

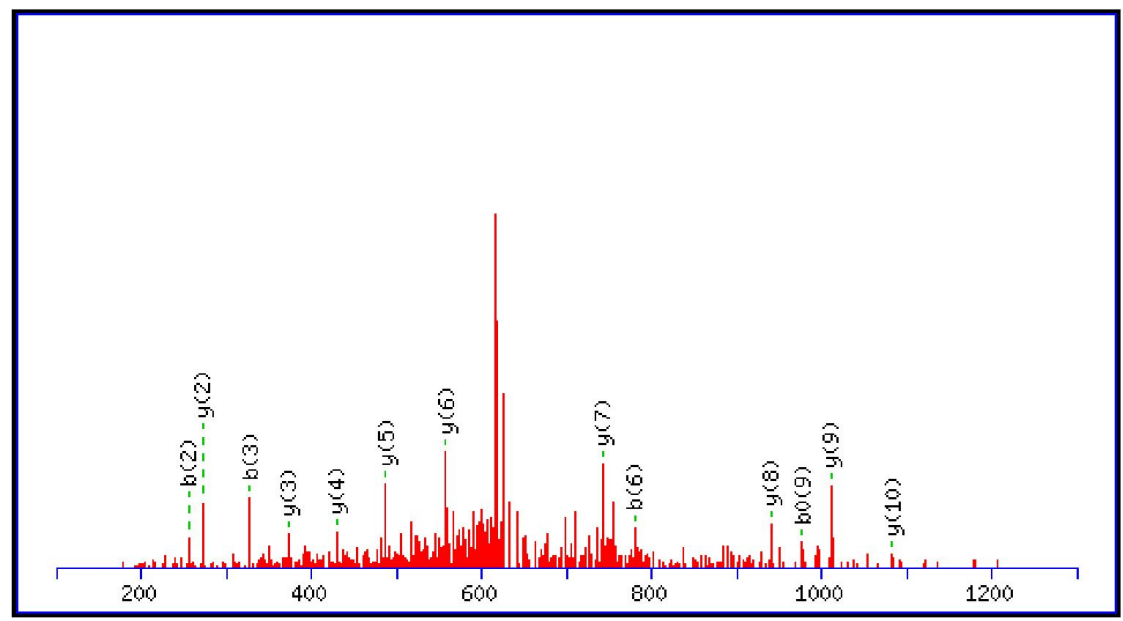

**Monoisotopic mass of neutral peptide Mr(calc):** 1265.7455

**Fixed modifications:** Carbamidomethyl (C) (apply to specified residues or termini only)

**Variable modifications:**

- K1** : Propionyl (K)
- K4** : Propionyl-Methylation (K)
- K5** : Propionyl (K)

**Ions Score:** 65 **Expect:** 0.00014

**Matches :** 13/100 fragment ions using 22 most intense peaks

| #  | b               | b <sup>++</sup> | b*        | b <sup>+++</sup> | b <sup>0</sup> | b <sup>0++</sup> | Seq. | y                | y <sup>++</sup> | y*        | y <sup>+++</sup> | y <sup>0</sup> | y <sup>0++</sup> | #  |
|----|-----------------|-----------------|-----------|------------------|----------------|------------------|------|------------------|-----------------|-----------|------------------|----------------|------------------|----|
| 1  | 185.1285        | 93.0679         | 168.1019  | 84.5546          |                |                  | K    |                  |                 |           |                  |                |                  | 11 |
| 2  | <b>256.1656</b> | 128.5864        | 239.1390  | 120.0731         |                |                  | A    | <b>1082.6317</b> | 541.8195        | 1065.6051 | 533.3062         | 1064.6211      | 532.8142         | 10 |
| 3  | <b>327.2027</b> | 164.1050        | 310.1761  | 155.5917         |                |                  | A    | <b>1011.5946</b> | 506.3009        | 994.5680  | 497.7376         | 993.5840       | 497.2956         | 9  |
| 4  | 525.3395        | 263.1734        | 508.3130  | 254.6601         |                |                  | K    | <b>940.5574</b>  | 470.7824        | 923.5309  | 462.2691         | 922.5469       | 461.7771         | 8  |
| 5  | 709.4607        | 355.2340        | 692.4341  | 346.7207         |                |                  | K    | <b>742.4206</b>  | 371.7139        | 725.3941  | 363.2007         | 724.4101       | 362.7087         | 7  |
| 6  | <b>780.4978</b> | 390.7525        | 768.4713  | 382.2393         |                |                  | A    | <b>558.2994</b>  | 279.6534        | 541.2729  | 271.1401         | 540.2889       | 270.6481         | 6  |
| 7  | 837.5193        | 419.2633        | 820.4927  | 410.7500         |                |                  | G    | <b>487.2623</b>  | 244.1343        | 470.2358  | 235.6215         | 469.2518       | 235.1295         | 5  |
| 8  | 894.5407        | 447.7740        | 877.5142  | 439.2607         |                |                  | G    | <b>430.2409</b>  | 215.6241        | 413.2143  | 207.1108         | 412.2303       | 206.6188         | 4  |
| 9  | 995.5884        | 498.2973        | 978.5619  | 489.7846         | 977.5778       | 489.2926         | T    | <b>373.2194</b>  | 187.1133        | 356.1923  | 178.6001         | 355.2088       | 178.1081         | 3  |
| 10 | 1092.6412       | 546.8242        | 1075.6146 | 538.3110         | 1074.6306      | 537.8189         | P    | <b>272.1717</b>  | 136.5895        | 255.1452  | 128.0762         |                |                  | 2  |
| 11 |                 |                 |           |                  |                |                  | R    | 175.1190         | 88.0631         | 158.0924  | 79.5493          |                |                  | 1  |

Found in **C9J4M6**, DNA-directed RNA polymerase OS=Homo sapiens GN=POLR2B PE=2 SV=2

Match to Query 7898: 1603.850568 from(802.932560, 2+) intensity(153082.6250)

Title: File1278 Spectrum6031 scans: 7564

Data file I:\2013-9-12-Hela-Prometh-Fr12-ZW.mgf

Click mouse within plot area to zoom in by factor of two about that point

Or,   to  Da Label all possible matches  Label matches used for scoring 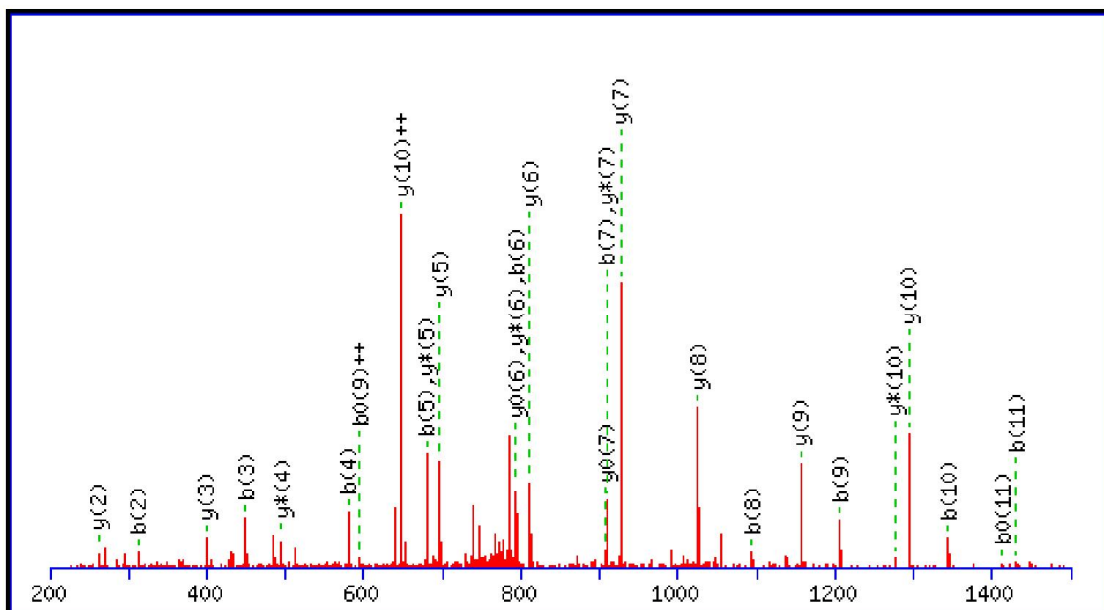Monoisotopic mass of neutral peptide **Mr(calc): 1603.8504**

Fixed modifications: Carbamidomethyl (C) (apply to specified residues or termini only)

Variable modifications:

**K2** : Propionyl-Methylation (K)**K8** : Propionyl (K)

Ions Score: 69 Expect: 0.00012

Matches : 28/118 fragment ions using 39 most intense peaks

| #  | b                | b <sup>++</sup> | b*        | b <sup>*++</sup> | b <sup>0</sup>   | b <sup>0++</sup> | Seq. | y                | y <sup>++</sup> | y*               | y <sup>*++</sup> | y <sup>0</sup>  | y <sup>0++</sup> | #  |
|----|------------------|-----------------|-----------|------------------|------------------|------------------|------|------------------|-----------------|------------------|------------------|-----------------|------------------|----|
| 1  | 114.0913         | 57.5493         |           |                  |                  |                  | L    |                  |                 |                  |                  |                 |                  | 12 |
| 2  | <b>312.3282</b>  | 156.6177        | 295.2016  | 148.1044         |                  |                  | K    | 1491.7737        | 746.3905        | 1474.7471        | 737.8772         | 1473.7631       | 737.3852         | 11 |
| 3  | <b>449.2871</b>  | 225.1472        | 432.2605  | 216.6339         |                  |                  | H    | <b>1293.6368</b> | <b>647.3221</b> | <b>1276.6103</b> | 638.8088         | 1275.6263       | 638.3168         | 10 |
| 4  | <b>588.3276</b>  | 290.6674        | 563.3010  | 282.1541         |                  |                  | H    | <b>1156.5779</b> | 578.7926        | 1139.5514        | 570.2798         | 1138.5674       | 569.7873         | 9  |
| 5  | <b>679.3960</b>  | 340.2016        | 662.3694  | 331.6884         |                  |                  | V    | <b>1025.5374</b> | 513.2724        | 1008.5109        | 504.7591         | 1007.5269       | 504.2671         | 8  |
| 6  | <b>794.4229</b>  | 397.7151        | 777.3964  | 389.2018         | 776.4124         | 388.7098         | D    | <b>926.4690</b>  | 463.7381        | <b>909.4425</b>  | 455.2249         | <b>908.4585</b> | 454.7329         | 7  |
| 7  | <b>909.4499</b>  | 455.2286        | 892.4233  | 446.7153         | 891.4393         | 446.2233         | D    | <b>811.4421</b>  | 406.2247        | <b>794.4155</b>  | 397.7114         | <b>793.4315</b> | 397.2194         | 6  |
| 8  | <b>1093.5710</b> | 547.2892        | 1076.5445 | 538.7759         | 1075.5605        | 538.2839         | K    | <b>696.4151</b>  | 348.7112        | <b>679.3886</b>  | 340.1979         | 678.4046        | 339.7059         | 5  |
| 9  | <b>1206.6551</b> | 603.8312        | 1189.6286 | 595.3179         | 1188.6445        | <b>594.8259</b>  | H    | 512.2940         | 256.6506        | <b>495.2674</b>  | 248.1373         | 494.2834        | 247.6453         | 4  |
| 10 | <b>1343.7140</b> | 672.3606        | 1326.6876 | 663.8474         | 1325.7035        | 663.3554         | H    | <b>399.2099</b>  | 200.1086        | 382.1833         | 191.5953         | 381.1993        | 191.1033         | 3  |
| 11 | <b>1430.7460</b> | 715.8767        | 1413.7195 | 707.3634         | <b>1412.7355</b> | 706.8714         | S    | <b>262.1510</b>  | 131.5791        | 245.1244         | 123.0659         | 244.1404        | 122.5738         | 2  |
| 12 |                  |                 |           |                  |                  |                  | R    | 175.1190         | 88.0631         | 158.0924         | 79.5498          |                 |                  | 1  |

MS/MS Fragmentation of **YANRVKKLNVDR**

Found in **Q8N4N8**, Kinesin-like protein KIF2B OS=Homo sapiens GN=KIF2B PE=1 SV=3

Match to Query 10508: 1643.945616 from(411.993680, 4+) intensity(184554.3906)

Title: File1322 Spectrum4320 scans: 4810

Data file I:\2013-9-13-Hela-Prometh-Fr1-ZW.mgf

Click mouse within plot area to zoom in by factor of two about that point

Or,   to  Da

Label all possible matches  Label matches used for scoring

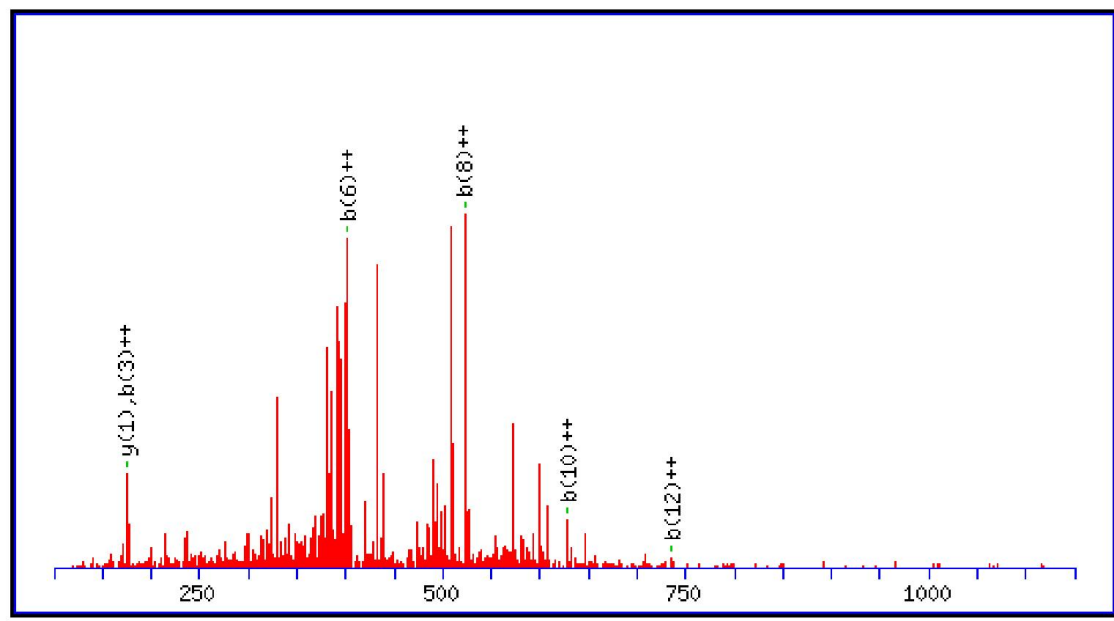

**Monoisotopic mass of neutral peptide Mr(calc): 1643.9471**

**Fixed modifications:** Carbamidomethyl (C) (apply to specified residues or all)

**Variable modifications:**

**K6** : Propionyl-Methylation (K)

**Ions Score: 23** **Expect: 3.8**

**Matches : 6/116** fragment ions using 10 most intense peaks [\(help\)](#)

| #  | b         | b <sup>++</sup> | b*        | b <sup>++</sup> | b <sup>0</sup> | b <sup>0++</sup> | Seq. | y               | y <sup>++</sup> | y*        | y <sup>++</sup> | y <sup>0</sup> | y <sup>0++</sup> | #  |
|----|-----------|-----------------|-----------|-----------------|----------------|------------------|------|-----------------|-----------------|-----------|-----------------|----------------|------------------|----|
| 1  | 164.0706  | 82.5389         |           |                 |                |                  | Y    |                 |                 |           |                 |                |                  | 13 |
| 2  | 235.1077  | 118.0575        |           |                 |                |                  | A    | 1481.8911       | 741.4492        | 1464.8645 | 732.9359        | 1463.8805      | 732.4439         | 12 |
| 3  | 349.1506  | <b>175.0790</b> | 332.1241  | 166.5657        |                |                  | N    | 1410.8540       | 705.9306        | 1393.8274 | 697.4173        | 1392.8434      | 696.9253         | 11 |
| 4  | 505.2518  | 253.1295        | 488.2252  | 244.6162        |                |                  | R    | 1296.8110       | 648.9092        | 1279.7845 | 640.3959        | 1278.8005      | 639.9039         | 10 |
| 5  | 604.3202  | 302.6637        | 587.2925  | 294.1504        |                |                  | V    | 1140.7099       | 570.8586        | 1123.6834 | 562.3453        | 1122.6994      | 561.8533         | 9  |
| 6  | 802.4570  | <b>401.7321</b> | 785.4305  | 393.2189        |                |                  | K    | 1041.6415       | 521.3244        | 1024.6150 | 512.8111        | 1023.6309      | 512.3191         | 8  |
| 7  | 930.5520  | 465.7796        | 913.5254  | 457.2663        |                |                  | K    | 843.5047        | 422.2560        | 826.4781  | 413.7427        | 825.4941       | 413.2507         | 7  |
| 8  | 1043.6360 | <b>522.3217</b> | 1026.6095 | 513.8084        |                |                  | L    | 715.4097        | 358.2085        | 698.3832  | 349.6952        | 697.3991       | 349.2032         | 6  |
| 9  | 1157.6790 | 579.3431        | 1140.6524 | 570.8298        |                |                  | N    | 602.3257        | 301.6665        | 585.2991  | 293.1532        | 584.3151       | 292.6612         | 5  |
| 10 | 1256.7474 | <b>628.8773</b> | 1239.7208 | 620.3640        |                |                  | V    | 488.2827        | 244.6450        | 471.2562  | 236.1317        | 470.2722       | 235.6397         | 4  |
| 11 | 1371.7743 | 686.3908        | 1354.7478 | 677.8775        | 1353.7637      | 677.3855         | D    | 389.2143        | 195.1108        | 372.1878  | 186.5975        | 371.2037       | 186.1055         | 3  |
| 12 | 1470.8427 | <b>735.9250</b> | 1453.8162 | 727.4117        | 1452.8322      | 726.9197         | V    | 274.1874        | 137.5973        | 257.1608  | 129.0840        |                |                  | 2  |
| 13 |           |                 |           |                 |                |                  | R    | <b>175.1190</b> | 88.0631         | 158.0924  | 79.5498         |                |                  | 1  |



Match to Query 2212: 1006.591048 from(504.302800, 2+) intensity(1489475.8750)

Title: File1322 Spectrum6191 scans: 6759

Data file I:\2013-9-13-Hela-Prometh-Fr1-ZW.mgf

Click mouse within plot area to zoom in by factor of two about that point

Or,   to  Da Label all possible matches  Label matches used for scoring 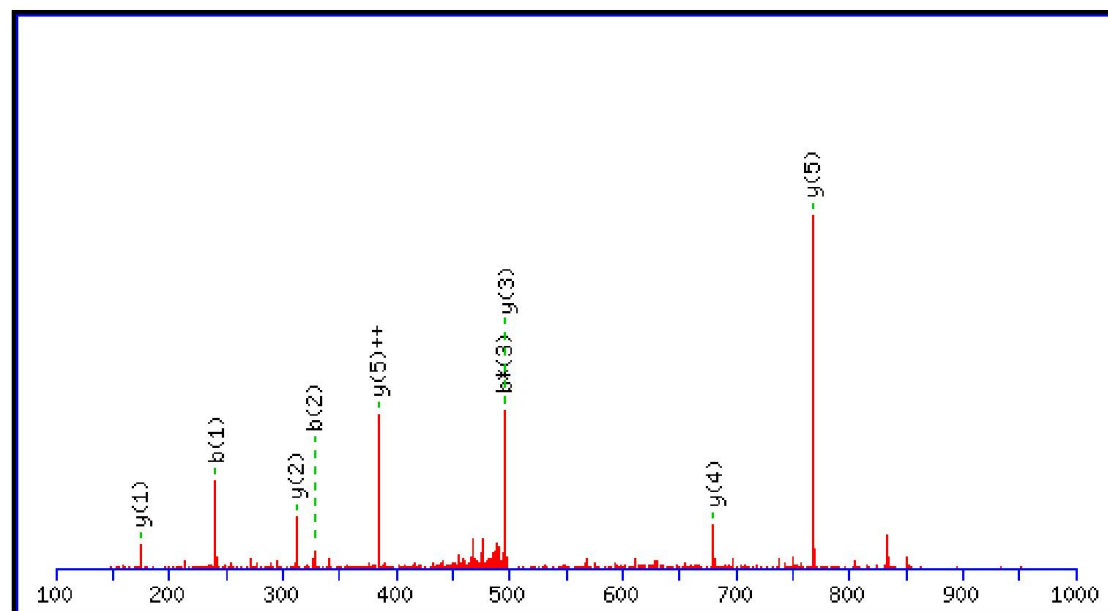**Monoisotopic mass of neutral peptide Mr(calc):** 1006.5923**Fixed modifications:** Carbamidomethyl (C) (apply to specified residues or termini only)**Variable modifications:****N-term** : Acetyl (Protein N-term)**K1** : Propionyl-Methylation (K)**K3** : Propionyl (K)**K4** : Propionyl (K)**Ions Score:** 28 **Expect:** 0.76**Matches** : 9/50 fragment ions using 17 most inten

| # | b               | b <sup>++</sup> | b*              | b* <sup>++</sup> | b <sup>0</sup> | b <sup>0++</sup> | Seq. | y               | y <sup>++</sup> | y*       | y* <sup>++</sup> | y <sup>0</sup> | y <sup>0++</sup> | # |
|---|-----------------|-----------------|-----------------|------------------|----------------|------------------|------|-----------------|-----------------|----------|------------------|----------------|------------------|---|
| 1 | <b>241.1547</b> | 121.0810        | 224.1281        | 112.5677         |                |                  | K    |                 |                 |          |                  |                |                  | 6 |
| 2 | <b>328.1867</b> | 164.5970        | 311.1601        | 156.0837         | 310.1761       | 155.5917         | S    | <b>767.4522</b> | <b>384.2298</b> | 750.4257 | 375.7165         | 749.4417       | 375.2245         | 5 |
| 3 | 512.3079        | 256.6576        | <b>495.2813</b> | 248.1443         | 494.2973       | 247.6523         | K    | <b>680.4202</b> | 340.7137        | 663.3937 | 332.2005         |                |                  | 4 |
| 4 | 696.4291        | 348.7182        | 679.4025        | 340.2049         | 678.4185       | 339.7129         | K    | <b>496.2990</b> | 248.6532        | 479.2725 | 240.1399         |                |                  | 3 |
| 5 | 833.4880        | 417.2476        | 816.4614        | 408.7343         | 815.4774       | 408.2423         | H    | <b>312.1779</b> | 156.5926        | 295.1513 | 148.0793         |                |                  | 2 |
| 6 |                 |                 |                 |                  |                |                  | R    | <b>175.1190</b> | 88.0631         | 158.0924 | 79.5498          |                |                  | 1 |

MS/MS Fragmentation of **GKYDKR**

Found in **B3VOL1**, ADF-ribosylation factor-like protein 6-interacting protein 4 OS=Homo sapiens GN=ARL6IP4 PE=2 SV=1

258

Match to Query 3089: 1075.602508 from(538.808530, 2+) intensity(157577.1250)

Title: File1322 Spectrum7803 scans: 8438

Data file I:\2013-9-13-Hela-Prometh-Frl-ZW.mgf

Click mouse within plot area to zoom in by factor of two about that point

Or,   to  Da

Label all possible matches  Label matches used for scoring

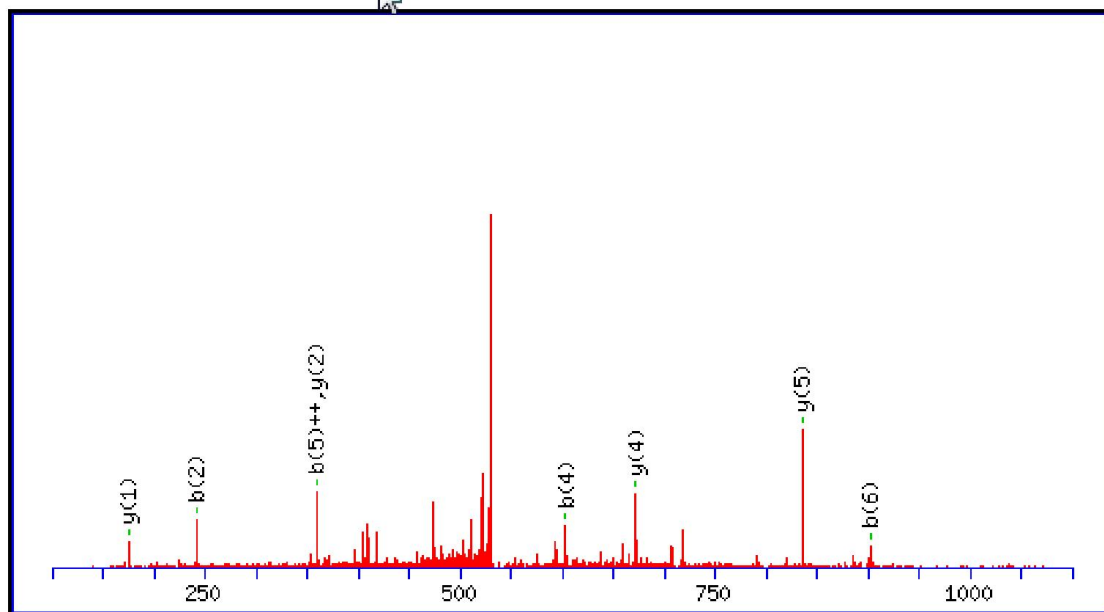

**Monoisotopic mass of neutral peptide Mr(calc):** 1075.6026

**Fixed modifications:** Carbamidomethyl (C) (apply to specified residues or termini only)

**Variable modifications:**

**K2** : Propionyl (K)

**K4** : Propionyl-Methylation (K)

**K6** : Propionyl (K)

**Ions Score:** 31 **Expect:** 0.38

**Matches** : 8/58 fragment ions using 10 most int

| # | b               | b <sup>++</sup> | b <sup>+</sup> | b <sup>*++</sup> | b <sup>0</sup> | b <sup>0++</sup> | Seq. | y               | y <sup>++</sup> | y <sup>+</sup> | y <sup>*++</sup> | y <sup>0</sup> | y <sup>0++</sup> | # |
|---|-----------------|-----------------|----------------|------------------|----------------|------------------|------|-----------------|-----------------|----------------|------------------|----------------|------------------|---|
| 1 | 58.0287         | 29.5180         |                |                  |                |                  | G    |                 |                 |                |                  |                |                  | 7 |
| 2 | <b>242.1499</b> | 141.5786        | 225.1234       | 113.0653         |                |                  | K    | 1019.5884       | 510.2978        | 1002.5619      | 501.7846         | 1001.5778      | 501.2926         | 6 |
| 3 | 405.2132        | 203.1103        | 388.1867       | 194.5970         |                |                  | Y    | <b>835.4672</b> | 418.2373        | 818.4407       | 409.7240         | 817.4567       | 409.2320         | 5 |
| 4 | <b>603.3501</b> | 302.1787        | 586.3235       | 293.6654         |                |                  | K    | <b>672.4039</b> | 336.7056        | 655.3774       | 328.1923         | 654.3933       | 327.7003         | 4 |
| 5 | 718.3770        | <b>359.6921</b> | 701.3505       | 351.1789         | 700.3665       | 350.6869         | D    | 474.2671        | 237.6372        | 457.2405       | 229.1239         | 456.2565       | 228.6319         | 3 |
| 6 | <b>902.4982</b> | 451.7527        | 885.4716       | 443.2395         | 884.4876       | 442.7475         | K    | <b>359.2401</b> | 180.1237        | 342.2136       | 171.6104         |                |                  | 2 |
| 7 |                 |                 |                |                  |                |                  | R    | <b>175.1190</b> | 88.0631         | 158.0924       | 79.5498          |                |                  | 1 |

Match to Query 1634: 957.560948 from(479.787750,2+) intensity(182960.3281)

Title: File1322 Spectrum5025 scans: 5544

Data file I:\2013-9-13-Hela-Prometh-Fr1-ZW.mgf

Click mouse within plot area to zoom in by factor of two about that point

Or,   to  Da Label all possible matches  Label matches used for scoring 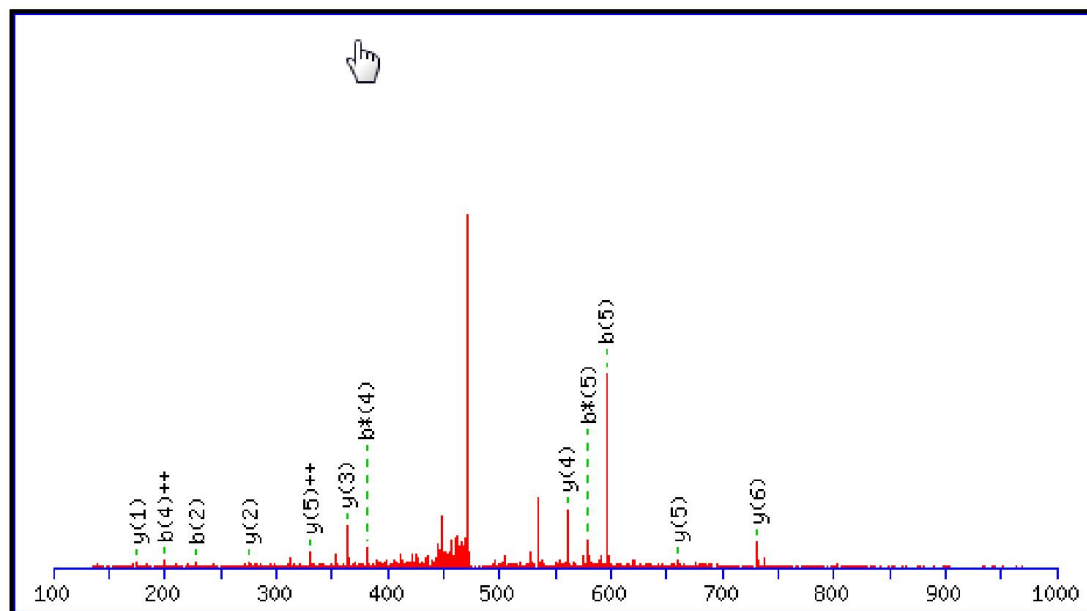**Monoisotopic mass of neutral peptide Mr(calc):** 957.5607**Fixed modifications:** Carbamidomethyl (C) (apply to specified residues or termini only)**Variable modifications:****K5** : Propionyl-Methylation (K)**Ions Score:** 32 **Expect:** 0.38**Matches** : 12/72 fragment ions using 27 most intense peaks

| # | b               | b <sup>++</sup> | b <sup>+</sup>  | b <sup>*++</sup> | b <sup>0</sup> | b <sup>0++</sup> | Seq. | y               | y <sup>++</sup> | y <sup>+</sup> | y <sup>*++</sup> | y <sup>0</sup> | y <sup>0++</sup> | # |
|---|-----------------|-----------------|-----------------|------------------|----------------|------------------|------|-----------------|-----------------|----------------|------------------|----------------|------------------|---|
| 1 | 129.0659        | 65.0366         | 112.0393        | 56.5233          |                |                  | Q    |                 |                 |                |                  |                |                  | 8 |
| 2 | <b>228.1343</b> | 114.5708        | 211.1077        | 106.0575         |                |                  | V    | 830.5094        | 415.7584        | 813.4829       | 407.2451         | 812.4989       | 406.7531         | 7 |
| 3 | 299.1714        | 150.0893        | 282.1448        | 141.5761         |                |                  | A    | <b>731.4410</b> | 366.2241        | 714.4145       | 357.7109         | 713.4305       | 357.2189         | 6 |
| 4 | 398.2398        | <b>199.6235</b> | <b>381.2132</b> | 191.1103         |                |                  | V    | <b>660.4039</b> | <b>330.7058</b> | 643.3774       | 322.1923         | 642.3933       | 321.7003         | 5 |
| 5 | <b>596.3766</b> | 298.6920        | <b>579.3501</b> | 290.1787         |                |                  | K    | <b>561.3355</b> | 281.1714        | 544.3089       | 272.6581         | 543.3249       | 272.1661         | 4 |
| 6 | 683.4087        | 342.2080        | 666.3921        | 333.6947         | 665.3981       | 333.2027         | S    | <b>363.1987</b> | 182.1030        | 346.1721       | 173.5897         | 345.1881       | 173.0977         | 3 |
| 7 | 784.4563        | 392.7318        | 767.4298        | 384.2185         | 766.4458       | 383.7265         | T    | <b>276.1666</b> | 138.5870        | 259.1401       | 130.0737         | 258.1561       | 129.5817         | 2 |
| 8 |                 |                 |                 |                  |                |                  | R    | <b>175.1190</b> | 88.0631         | 158.0924       | 79.5498          |                |                  | 1 |

MS/MS Fragmentation of **AKDLSKR**  
Found in **P48634**, Protein PRRC2A OS=Homo sapiens GN=PRRC2A PE=1 SV=3

Match to Query 1498: 942.549408 from(472.281980, 2+) intensity(922889.5625)  
Title: File1322 Spectrum7582 scans: 8208  
Data file I:\2013-9-13-Hela-Prometh-Fr1-ZW.mgf

Click mouse within plot area to zoom in by factor of two about that point  
Or,   to  Da   
Label all possible matches  Label matches used for scoring

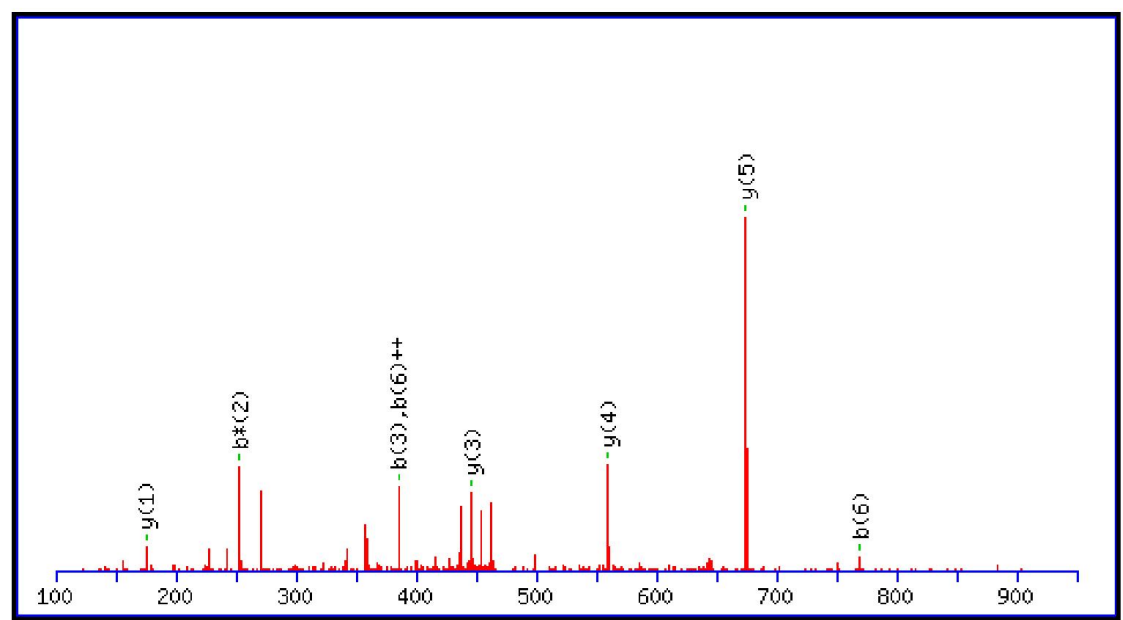

**Monoisotopic mass of neutral peptide Mr(calc):** 942.5498  
**Fixed modifications:** Carbamidomethyl (C) (apply to specified residues or termini only)  
**Variable modifications:**  
**K2** : Propionyl-Methylation (K)  
**K6** : Propionyl (K)  
**Ions Score:** 34 **Expect:** 0.24  
**Matches :** 8/62 fragment ions using 8 most intense peak

| # | b        | b <sup>++</sup> | b <sup>+</sup> | b <sup>+++</sup> | b <sup>0</sup> | b <sup>0++</sup> | Seq. | y        | y <sup>++</sup> | y <sup>+</sup> | y <sup>+++</sup> | y <sup>0</sup> | y <sup>0++</sup> | # |
|---|----------|-----------------|----------------|------------------|----------------|------------------|------|----------|-----------------|----------------|------------------|----------------|------------------|---|
| 1 | 72.0444  | 36.5258         |                |                  |                |                  | A    |          |                 |                |                  |                |                  | 7 |
| 2 | 270.1812 | 135.5942        | 253.1547       | 127.0810         |                |                  | K    | 872.5200 | 436.7636        | 855.4934       | 428.2504         | 854.5094       | 427.7584         | 6 |
| 3 | 385.2082 | 193.1077        | 368.1816       | 184.5944         | 367.1976       | 184.1024         | D    | 674.3832 | 337.6952        | 657.3566       | 329.1819         | 656.3726       | 328.6899         | 5 |
| 4 | 498.2922 | 249.6498        | 481.2657       | 241.8655         | 480.2817       | 240.6445         | L    | 559.3562 | 280.1817        | 542.3297       | 271.6685         | 541.3457       | 271.1765         | 4 |
| 5 | 585.3243 | 293.1658        | 568.2977       | 284.6525         | 567.3137       | 284.1605         | S    | 446.2722 | 223.6397        | 429.2456       | 215.1264         | 428.2616       | 214.6344         | 3 |
| 6 | 769.4454 | 385.2264        | 752.4189       | 376.7131         | 751.4349       | 376.2211         | K    | 359.2401 | 180.1237        | 342.2136       | 171.6104         |                |                  | 2 |
| 7 |          |                 |                |                  |                |                  | R    | 175.1190 | 88.0631         | 158.0924       | 79.5498          |                |                  | 1 |

Match to Query 6436: 1375.672208 from(688.843380,2+) intensity(93149.6563)

Title: File1322 Spectrum9232 scans: 9926

Data file I:\2013-9-13-Hela-Prometh-Fri1-ZW.mgf

Click mouse within plot area to zoom in by factor of two about that point

Or,   to  Da Label all possible matches  Label matches used for scoring 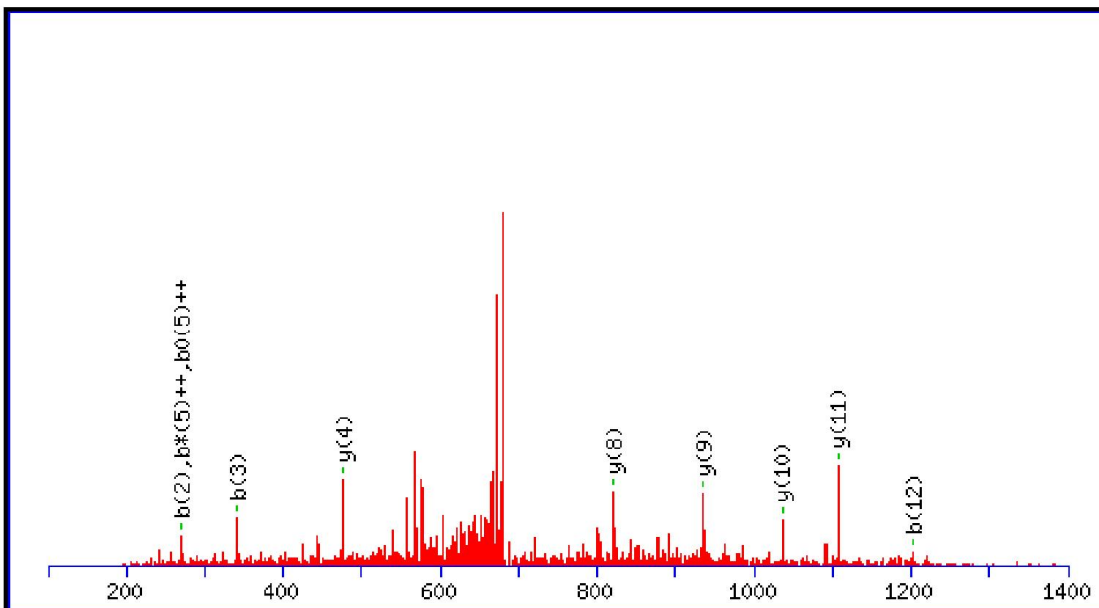Monoisotopic mass of neutral peptide **Mr(calc)**: 1375.6732

Fixed modifications: Carbamidomethyl (C) (apply to specified residues or termini only)

Variable modifications:

**K1** : Propionyl-Methylation (K)

Ions Score: 33 Expect: 0.22

Matches : 10/130 fragment ions using 12 most intense peaks

| #  | b                | b <sup>++</sup> | b*        | b <sup>++</sup> | b <sup>0</sup> | b <sup>0++</sup> | Seq. | y                | y <sup>++</sup> | y*        | y <sup>++</sup> | y <sup>0</sup> | y <sup>0++</sup> | #  |
|----|------------------|-----------------|-----------|-----------------|----------------|------------------|------|------------------|-----------------|-----------|-----------------|----------------|------------------|----|
| 1  | 199.1441         | 100.0757        | 182.1176  | 91.5624         |                |                  | K    |                  |                 |           |                 |                |                  | 13 |
| 2  | <b>270.1812</b>  | 135.5942        | 253.1547  | 127.0810        |                |                  | A    | 1178.5436        | 589.7755        | 1161.5171 | 581.2622        | 1160.5331      | 580.7702         | 12 |
| 3  | <b>341.2183</b>  | 171.1128        | 324.1918  | 162.5995        |                |                  | A    | <b>1107.5055</b> | 554.2569        | 1090.4800 | 545.7436        | 1089.4960      | 545.2516         | 11 |
| 4  | 442.2660         | 221.6366        | 425.2395  | 213.1234        | 424.2554       | 212.6314         | T    | <b>1036.4694</b> | 518.7383        | 1019.4429 | 510.2251        | 1018.4589      | 509.7331         | 10 |
| 5  | 557.2930         | 279.1501        | 540.2664  | <b>270.6368</b> | 539.2824       | <b>270.1448</b>  | D    | <b>935.4217</b>  | 468.2145        | 918.3952  | 459.7012        | 917.4112       | 459.2092         | 9  |
| 6  | 614.3144         | 307.6608        | 597.2879  | 299.1476        | 596.3039       | 298.6556         | G    | <b>820.3948</b>  | 410.7010        | 803.3682  | 402.1878        | 802.3842       | 401.6958         | 8  |
| 7  | 685.3515         | 343.1794        | 668.3250  | 334.6661        | 667.3410       | 334.1741         | A    | 763.3733         | 382.1903        | 746.3468  | 373.6770        | 745.3628       | 373.1850         | 7  |
| 8  | 800.3785         | 400.6929        | 783.3519  | 392.1796        | 782.3679       | 391.6876         | D    | 692.3362         | 346.6717        | 675.3097  | 338.1585        | 674.3257       | 337.6665         | 6  |
| 9  | 901.4262         | 451.2167        | 884.3996  | 442.7034        | 883.4156       | 442.2114         | T    | 577.3093         | 289.1583        | 560.2827  | 280.6450        | 559.2987       | 280.1530         | 5  |
| 10 | 998.4789         | 499.7431        | 981.4524  | 491.2298        | 980.4684       | 490.7378         | P    | <b>476.2616</b>  | 238.6344        | 459.2350  | 230.1212        |                |                  | 4  |
| 11 | 1145.5473        | 573.2773        | 1128.5208 | 564.7640        | 1127.5368      | 564.2720         | F    | 379.2088         | 190.1081        | 362.1823  | 181.5948        |                |                  | 3  |
| 12 | <b>1202.5688</b> | 601.7880        | 1185.5422 | 593.2748        | 1184.5582      | 592.7828         | G    | 232.1404         | 116.5738        | 215.1139  | 108.0606        |                |                  | 2  |
| 13 |                  |                 |           |                 |                |                  | R    | 175.1190         | 88.0631         | 158.0924  | 79.5498         |                |                  | 1  |

MS/MS Fragmentation of **VEEAPVKKAKR**

Found in **HOY9Y2**, Biorientation of chromosomes in cell division protein 1-like 1 (Fragment) OS=Homo sapiens GN=BOD1L1 PE=4 SW=1

262

Match to Query 7444: 1435.838588 from(718.926570, 2+) intensity(478861.4688)

Title: File1322 Spectrum10007 scans: 10734

Data file I:\2013-9-13-Hela-Prometh-Fr1-ZW.mgf

Click mouse within plot area to zoom in by factor of two about that point

Or,   to  Da

Label all possible matches  Label matches used for scoring

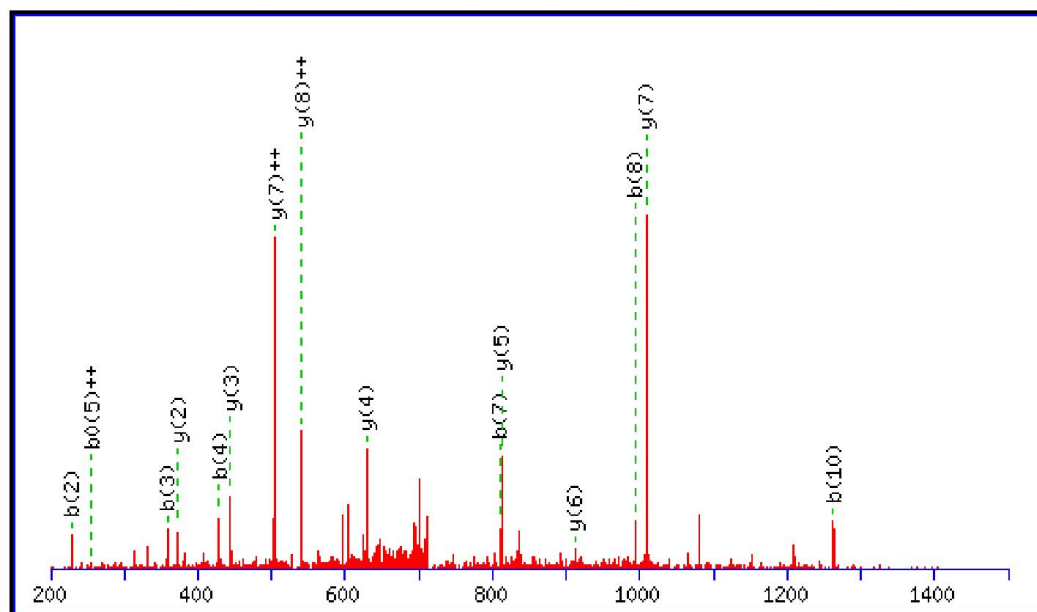

**Monoisotopic mass of neutral peptide Mr(calc):** 1435.8398

**Fixed modifications:** Carbamidomethyl (C) (apply to specified residues or termini only)

**Variable modifications:**

**K7** : Propionyl (K)

**K8** : Propionyl (K)

**K10** : Propionyl-Methylation (K)

**Ions Score:** 51 **Expect:** 0.004

**Matches** : 15/90 fragment ions using 25 most intense peaks ([help](#))

| #  | b                | b <sup>++</sup> | b <sup>+</sup> | b <sup>***</sup> | b <sup>0</sup> | b <sup>0++</sup> | Seq. | y                | y <sup>++</sup> | y <sup>+</sup> | y <sup>***</sup> | y <sup>0</sup> | y <sup>0++</sup> | #  |
|----|------------------|-----------------|----------------|------------------|----------------|------------------|------|------------------|-----------------|----------------|------------------|----------------|------------------|----|
| 1  | 100.0757         | 50.5415         |                |                  |                |                  | V    |                  |                 |                |                  |                |                  | 11 |
| 2  | <b>229.1183</b>  | 115.0628        |                |                  | 211.1077       | 106.0575         | E    | 1837.7787        | 669.3930        | 1320.7522      | 660.8797         | 1319.7682      | 660.3877         | 10 |
| 3  | <b>358.1609</b>  | 179.5841        |                |                  | 340.1503       | 170.5788         | E    | 1208.7361        | 604.8717        | 1191.7096      | 596.3584         | 1190.7256      | 595.8664         | 9  |
| 4  | <b>429.1980</b>  | 215.1026        |                |                  | 411.1874       | 206.0974         | A    | 1079.6935        | <b>540.3504</b> | 1062.6670      | 531.8371         |                |                  | 8  |
| 5  | 526.2508         | 263.6290        |                |                  | 508.2402       | <b>254.6237</b>  | P    | <b>1008.6564</b> | <b>504.8319</b> | 991.6299       | 496.3186         |                |                  | 7  |
| 6  | 625.3192         | 313.1632        |                |                  | 607.3086       | 304.1579         | V    | <b>911.6037</b>  | 456.3055        | 894.5771       | 447.7922         |                |                  | 6  |
| 7  | <b>809.4403</b>  | 405.2238        | 792.4138       | 396.7105         | 791.4298       | 396.2185         | K    | <b>812.5353</b>  | 406.7713        | 795.5087       | 398.2580         |                |                  | 5  |
| 8  | <b>993.5615</b>  | 497.2844        | 976.6350       | 488.7711         | 975.5510       | 488.2791         | K    | <b>628.4141</b>  | 314.7107        | 611.3875       | 306.1974         |                |                  | 4  |
| 9  | 1064.5996        | 532.8030        | 1047.5721      | 524.2897         | 1046.5881      | 523.7977         | A    | <b>444.2929</b>  | 222.6501        | 427.2663       | 214.1368         |                |                  | 3  |
| 10 | <b>1262.7355</b> | 631.8714        | 1245.7089      | 623.3581         | 1244.7249      | 622.8661         | K    | <b>373.2558</b>  | 187.1315        | 356.2292       | 178.6183         |                |                  | 2  |
| 11 |                  |                 |                |                  |                |                  | R    | 175.1190         | 88.0631         | 158.0924       | 79.5498          |                |                  | 1  |

Found in **MORO15**, Far upstream element-binding protein 2 (Fragment) OS=Homo sapiens GN=KHSRP PE=4 SV=1

Match to Query 4389: 1193.631068 from(597.822810, 2+) intensity(275242.0313)

Title: File1322 Spectrum10083 scans: 10813

Data file I:\2013-9-13-Hela-Prometh-Fr1-ZW.mgf

Click mouse within plot area to zoom in by factor of two about that point

Or,   to  Da Label all possible matches  Label matches used for scoring 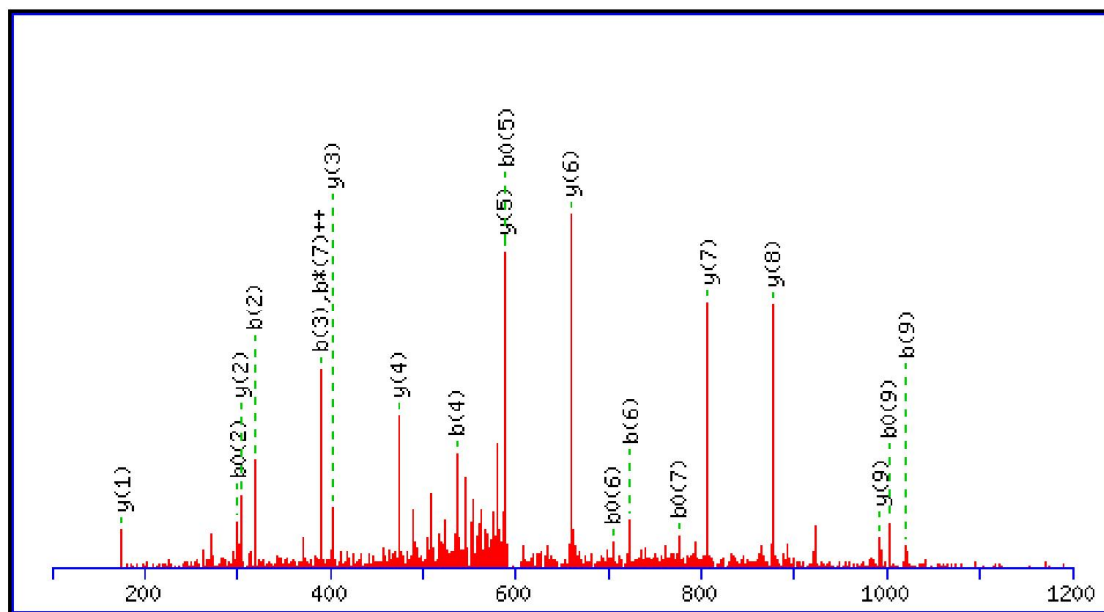**Monoisotopic mass of neutral peptide Mr(calc):** 1193.6313**Fixed modifications:** Carbamidomethyl (C) (apply to specified residues or termini only)**Variable modifications:****K1** : Propionyl-(13CD3)Methyl (K)**Ions Score:** 70 **Expect:** 6.7e-005**Matches** : 20/98 fragment ions using 31 most intense peaks (

| #  | b                | b <sup>++</sup> | b <sup>+</sup> | b <sup>*++</sup> | b <sup>0</sup>   | b <sup>0++</sup> | Seq.     | y               | y <sup>++</sup> | y <sup>+</sup> | y <sup>*++</sup> | y <sup>0</sup> | y <sup>0++</sup> | #  |
|----|------------------|-----------------|----------------|------------------|------------------|------------------|----------|-----------------|-----------------|----------------|------------------|----------------|------------------|----|
| 1  | 203.1663         | 102.0868        | 186.1397       | 93.5735          |                  |                  | <b>K</b> |                 |                 |                |                  |                |                  | 10 |
| 2  | <b>318.1932</b>  | 159.6003        | 301.1667       | 151.0870         | <b>300.1827</b>  | 150.5950         | <b>D</b> | <b>992.4796</b> | 496.7434        | 975.4530       | 488.2302         | 974.4690       | 487.7381         | 9  |
| 3  | <b>389.2303</b>  | 195.1188        | 372.2038       | 186.6055         | 371.2198         | 186.1135         | <b>A</b> | <b>877.4526</b> | 439.2300        | 860.4261       | 430.7167         | 859.4421       | 430.2247         | 8  |
| 4  | <b>536.2988</b>  | 268.6530        | 519.2722       | 260.1397         | 518.2882         | 259.6477         | <b>F</b> | <b>806.4155</b> | 403.7114        | 789.3890       | 395.1981         | 788.4050       | 394.7061         | 7  |
| 5  | 607.3359         | 304.1716        | 590.3093       | 295.6583         | <b>589.3253</b>  | 295.1663         | <b>A</b> | <b>659.3471</b> | 330.1772        | 642.3206       | 321.6639         | 641.3365       | 321.1719         | 6  |
| 6  | <b>722.3628</b>  | 361.6850        | 705.3563       | 353.1718         | <b>704.3523</b>  | 352.6798         | <b>D</b> | <b>588.3100</b> | 294.6586        | 571.2835       | 286.1454         | 570.2994       | 285.6534         | 5  |
| 7  | 793.3999         | 397.2036        | 776.3734       | <b>388.6903</b>  | <b>775.3894</b>  | 388.1983         | <b>A</b> | <b>473.2831</b> | 237.1452        | 456.2565       | 228.6319         |                |                  | 4  |
| 8  | 892.4683         | 446.7378        | 875.4418       | 438.2245         | 874.4578         | 437.7325         | <b>V</b> | <b>402.2459</b> | 201.6266        | 385.2194       | 193.1133         |                |                  | 3  |
| 9  | <b>1020.5269</b> | 510.7671        | 1003.5004      | 502.2538         | <b>1002.5164</b> | 501.7618         | <b>Q</b> | <b>303.1775</b> | 152.0924        | 286.1510       | 143.5791         |                |                  | 2  |
| 10 |                  |                 |                |                  |                  |                  | <b>R</b> | <b>175.1190</b> | 88.0631         | 158.0924       | 79.5498          |                |                  | 1  |

Found in **J3KQL8**, Apolipoprotein L2 OS=Homo sapiens GN=APOL2 PE=4 SV=1

Match to Query 10319: 1705.851288 from(853.932920, 2+) intensity(74072.5781)

Title: File1332 Spectrum6206 scans: 7251

Data file I:\2013-9-14-Hela-Prometh-Fr10-ZW.mgf

Click mouse within plot area to zoom in by factor of two about that point

Or,   to  Da Label all possible matches  Label matches used for scoring 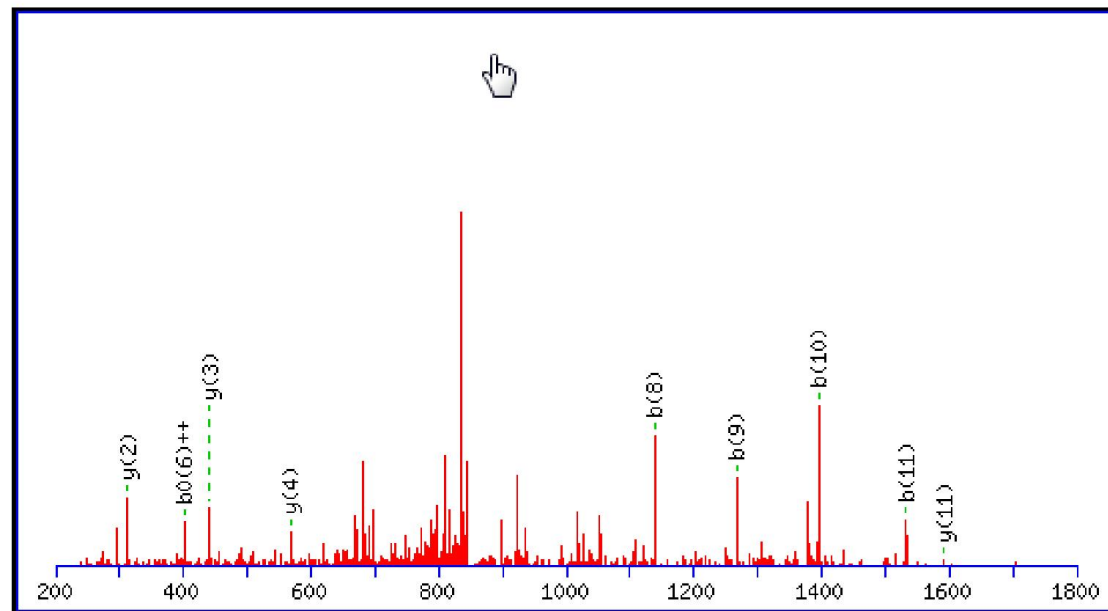**Monoisotopic mass of neutral peptide Mr(calc):** 1705.8517**Fixed modifications:** Carbamidomethyl (C) (apply to specified residues or termini only)**Variable modifications:****K2** : Propionyl (K)**K7** : Propionyl-(13CD3)Methyl (K)**Ions Score:** 26 **Expect:** 1.9**Matches** : 9/122 fragment ions using 15 most intense peaks ([help](#))

| #  | b                | b <sup>++</sup> | b <sup>+</sup> | b <sup>+++</sup> | b <sup>0</sup> | b <sup>0++</sup> | Seq. | y                | y <sup>++</sup> | y <sup>+</sup> | y <sup>+++</sup> | y <sup>0</sup> | y <sup>0++</sup> | #  |
|----|------------------|-----------------|----------------|------------------|----------------|------------------|------|------------------|-----------------|----------------|------------------|----------------|------------------|----|
| 1  | 116.0342         | 58.5207         |                |                  | 98.0237        | 49.5155          | D    |                  |                 |                |                  |                |                  | 12 |
| 2  | 300.1554         | 150.5813        | 283.1288       | 142.0681         | 282.1448       | 141.5761         | K    | <b>1591.8320</b> | 796.4197        | 1574.8055      | 787.9064         | 1573.8215      | 787.4144         | 11 |
| 3  | 414.1983         | 207.6028        | 397.1718       | 199.0895         | 396.1878       | 198.5975         | N    | 1407.7109        | 704.3591        | 1390.6843      | 695.8458         | 1389.7003      | 695.3538         | 10 |
| 4  | 570.2994         | 285.6534        | 553.2729       | 277.1401         | 552.2893       | 276.6481         | R    | 1293.6679        | 647.3376        | 1276.6414      | 638.8243         | 1275.6574      | 638.3323         | 9  |
| 5  | 707.3583         | 354.1828        | 690.3318       | 345.6695         | 689.3478       | 345.1775         | H    | 1137.5668        | 569.2871        | 1120.5403      | 560.7738         | 1119.5563      | 560.2818         | 8  |
| 6  | 822.3853         | 411.6963        | 805.3587       | 403.1830         | 804.3747       | <b>402.6910</b>  | D    | 1000.5079        | 500.7576        | 983.4814       | 492.2443         | 982.4974       | 491.7523         | 7  |
| 7  | 1024.5443        | 512.7758        | 1007.5178      | 504.2625         | 1006.5337      | 503.7705         | K    | 885.4810         | 443.2441        | 868.4544       | 434.7309         | 867.4704       | 434.2388         | 6  |
| 8  | <b>1139.5712</b> | 570.2893        | 1122.5447      | 561.7760         | 1121.5607      | 561.2840         | D    | 683.3220         | 342.1646        | 666.2954       | 333.6513         | 665.3114       | 333.1593         | 5  |
| 9  | <b>1267.6298</b> | 634.3186        | 1250.6033      | 625.8053         | 1249.6193      | 625.3133         | Q    | <b>568.2950</b>  | 284.6511        | 551.2635       | 276.1379         |                |                  | 4  |
| 10 | <b>1395.6884</b> | 698.3478        | 1378.6619      | 689.8346         | 1377.6778      | 689.3426         | Q    | <b>440.2364</b>  | 220.6219        | 423.2099       | 212.1086         |                |                  | 3  |
| 11 | <b>1532.7473</b> | 766.8773        | 1515.7208      | 758.3640         | 1514.7367      | 757.8720         | H    | <b>312.1779</b>  | 156.5926        | 295.1513       | 148.0793         |                |                  | 2  |
| 12 |                  |                 |                |                  |                |                  | R    | 175.1190         | 88.0631         | 168.0924       | 79.5498          |                |                  | 1  |



MS/MS Fragmentation of **SKDLKPGAR**Found in **B4DI41**, Methyl-CpG-binding domain protein 1 OS=Homo sapiens GN=MBD1 PE=2 SV=1

Match to Query 3722: 1280.744848 from(641.379700, 2+) intensity(181230.8594)

Title: File1332 Spectrum9031 scans: 10194

Data file I:\2013-9-14-Hela-Prometh-Fr10-ZW.mgf

Click mouse within plot area to zoom in by factor of two about that point

Or,   to  Da Label all possible matches  Label matches used for scoring 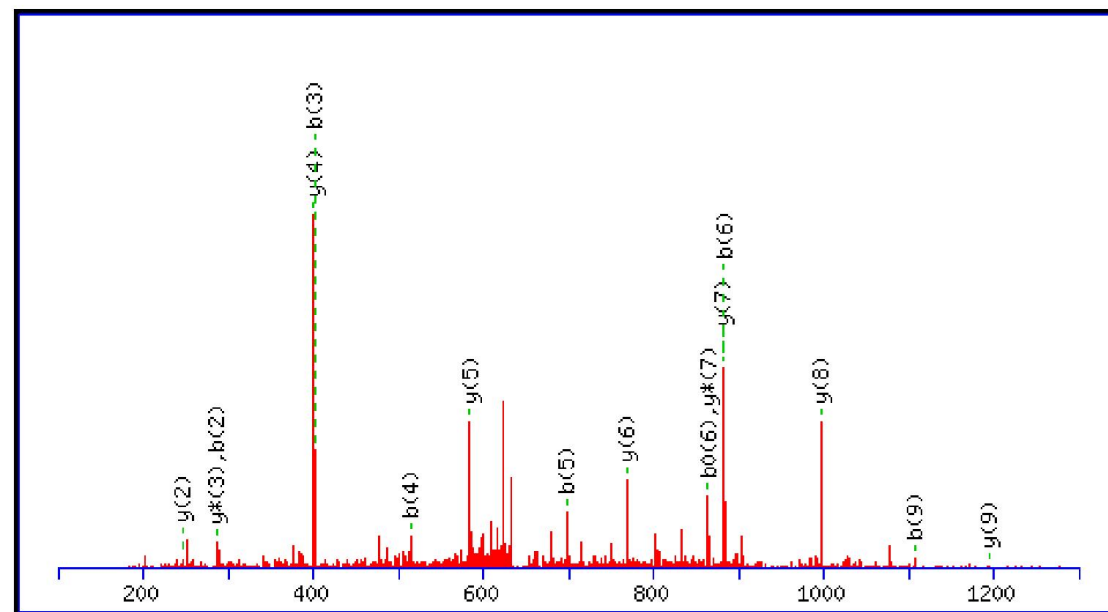**Monoisotopic mass of neutral peptide Mr(calc):** 1280.7452**Fixed modifications:** Carbamidomethyl (C) (apply to specified residues or termini only)**Variable modifications:****K2** : Propionyl-Methylation (K)**K5** : Propionyl (K)**K6** : Propionyl (K)**Ions Score:** 38 **Expect:** 0.079**Matches** : 16/92 fragment ions using 33 most intense

| #  | b                | b <sup>++</sup> | b*        | b* <sup>++</sup> | b <sup>0</sup>  | b <sup>0++</sup> | Seq. | y                | y <sup>++</sup> | y*              | y* <sup>++</sup> | y <sup>0</sup> | y <sup>0++</sup> | #  |
|----|------------------|-----------------|-----------|------------------|-----------------|------------------|------|------------------|-----------------|-----------------|------------------|----------------|------------------|----|
| 1  | 88.0393          | 44.5233         |           |                  | 70.0287         | 35.5180          | S    |                  |                 |                 |                  |                |                  | 10 |
| 2  | <b>286.1761</b>  | 143.5917        | 269.1496  | 135.0784         | 268.1656        | 134.5864         | K    | <b>1194.7205</b> | 597.8639        | 1177.6939       | 589.3506         | 1176.7099      | 588.8586         | 9  |
| 3  | <b>401.2031</b>  | 201.1052        | 384.1765  | 192.5919         | 383.1925        | 192.0999         | D    | <b>996.5837</b>  | 498.7955        | 979.5571        | 490.2822         | 978.5731       | 489.7902         | 8  |
| 4  | <b>514.2871</b>  | 257.6472        | 497.2606  | 248.1339         | 496.2766        | 248.6419         | L    | <b>881.5567</b>  | 441.2820        | <b>864.5302</b> | 432.7687         |                |                  | 7  |
| 5  | <b>698.4083</b>  | 349.7078        | 681.3818  | 341.1945         | 680.3978        | 340.7025         | K    | <b>768.4726</b>  | 384.7400        | 751.4461        | 376.2267         |                |                  | 6  |
| 6  | <b>882.5295</b>  | 441.7684        | 865.5029  | 433.2551         | <b>864.5189</b> | 432.7631         | K    | <b>584.3515</b>  | 292.6794        | 567.3249        | 284.1661         |                |                  | 5  |
| 7  | 979.5823         | 490.2948        | 962.5557  | 481.7815         | 961.5717        | 481.2895         | P    | <b>400.2303</b>  | 200.6188        | 383.2037        | 192.1055         |                |                  | 4  |
| 8  | 1036.6037        | 518.8055        | 1019.5772 | 510.2922         | 1018.5932       | 509.8002         | G    | 303.1775         | 152.0924        | <b>286.1510</b> | 143.5791         |                |                  | 3  |
| 9  | <b>1107.6408</b> | 554.3241        | 1090.6143 | 545.8108         | 1089.6303       | 545.3188         | A    | <b>246.1561</b>  | 123.5817        | 229.1295        | 115.0684         |                |                  | 2  |
| 10 |                  |                 |           |                  |                 |                  | R    | 175.1190         | 88.0631         | 158.0924        | 79.5498          |                |                  | 1  |

Match to Query 13687: 1884.034768 from(943.024660,2+) intensity(38959.1758)

Title: File1332 Spectrum11611 scans: 12881

Data file I:\2013-9-14-Hela-Prometh-Fr10-ZW.mgf

Click mouse within plot area to zoom in by factor of two about that point

Or,   to  Da

Label all possible matches  Label matches used for scoring

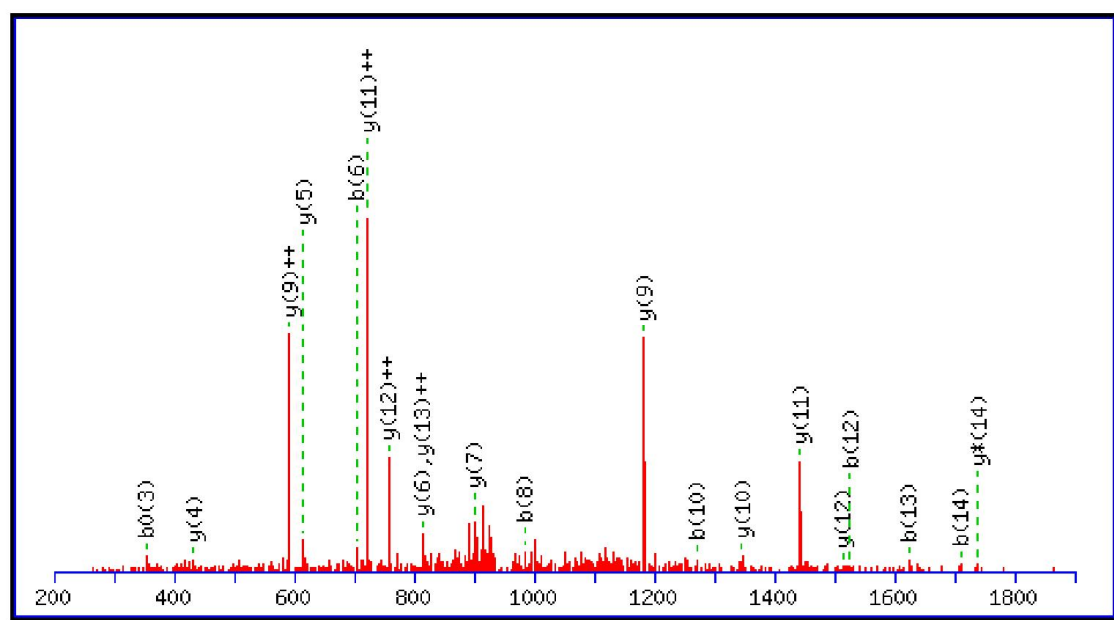

**Monoisotopic mass of neutral peptide Mr(calc): 1884.0356**

**Fixed modifications:** Carbamidomethyl (C) (apply to specified residues only)

**Variable modifications:**

- K8** : Propionyl (K)
- K10** : Propionyl-Methylation (K)
- K11** : Propionyl (K)

**Ions Score: 33 Expect: 0.59**

**Matches : 20/152 fragment ions using 47 most intense peaks** [\(help\)](#)

| #  | b         | b <sup>++</sup> | b <sup>*</sup> | b <sup>*++</sup> | b <sup>0</sup> | b <sup>0++</sup> | Seq. | y         | y <sup>++</sup> | y <sup>*</sup> | y <sup>*++</sup> | y <sup>0</sup> | y <sup>0++</sup> | #  |
|----|-----------|-----------------|----------------|------------------|----------------|------------------|------|-----------|-----------------|----------------|------------------|----------------|------------------|----|
| 1  | 130.0499  | 65.5286         |                |                  | 112.0393       | 56.5233          | E    |           |                 |                |                  |                |                  | 15 |
| 2  | 259.0925  | 130.0499        |                |                  | 241.0819       | 121.0446         | E    | 1756.0003 | 873.5038        | 1738.9738      | 869.9905         | 1737.9898      | 869.4985         | 14 |
| 3  | 372.1765  | 186.5919        |                |                  | 354.1660       | 177.5866         | L    | 1626.9578 | 813.9825        | 1609.9312      | 805.4692         | 1608.9472      | 804.9772         | 13 |
| 4  | 443.2136  | 222.1105        |                |                  | 425.2031       | 213.1052         | A    | 1513.8737 | 757.4405        | 1496.8471      | 748.3272         | 1495.8631      | 748.4352         | 12 |
| 5  | 540.2664  | 270.6368        |                |                  | 522.2558       | 261.6316         | P    | 1442.8366 | 721.9219        | 1425.8100      | 713.4037         | 1424.8260      | 712.9166         | 11 |
| 6  | 703.3297  | 352.1685        |                |                  | 685.3192       | 343.1632         | Y    | 1345.7838 | 673.3955        | 1328.7573      | 664.8823         | 1327.7732      | 664.3903         | 10 |
| 7  | 800.3825  | 400.6949        |                |                  | 782.3719       | 391.6896         | P    | 1182.7205 | 591.8639        | 1165.6939      | 583.3506         | 1164.7099      | 582.8586         | 9  |
| 8  | 984.5037  | 492.7555        | 967.4771       | 484.2422         | 966.4931       | 483.7502         | K    | 1085.6677 | 543.3375        | 1068.6412      | 534.8242         | 1067.6572      | 534.3322         | 8  |
| 9  | 1071.5357 | 536.2715        | 1054.5092      | 527.7582         | 1053.5251      | 527.2662         | S    | 901.5465  | 451.2769        | 884.5200       | 442.7636         | 883.5360       | 442.2716         | 7  |
| 10 | 1269.6725 | 635.3399        | 1252.6460      | 626.8266         | 1251.6620      | 626.3346         | K    | 814.5145  | 407.7609        | 797.4880       | 399.2476         | 796.5039       | 398.7556         | 6  |
| 11 | 1453.7937 | 727.4005        | 1436.7672      | 718.8872         | 1435.7831      | 718.3952         | K    | 616.3777  | 308.6925        | 599.3511       | 300.1792         | 598.3671       | 299.6872         | 5  |
| 12 | 1524.8308 | 762.9190        | 1507.8043      | 754.4058         | 1506.8203      | 753.9138         | A    | 432.2565  | 216.6319        | 415.2300       | 208.1186         | 414.2459       | 207.6266         | 4  |
| 13 | 1623.8992 | 812.4533        | 1606.8727      | 803.9400         | 1605.8887      | 803.4480         | V    | 361.2194  | 181.1133        | 344.1928       | 172.6001         | 343.2088       | 172.1081         | 3  |
| 14 | 1710.9313 | 855.9693        | 1693.9047      | 847.4560         | 1692.9207      | 846.9640         | S    | 262.1510  | 131.5791        | 245.1244       | 123.0659         | 244.1404       | 122.5738         | 2  |
| 15 |           |                 |                |                  |                |                  | R    | 175.1190  | 88.0631         | 158.0924       | 79.5498          |                |                  | 1  |

Match to Query 7435: 1536.834928 from(769.424740, 2+) intensity(398615.8125)

Title: File1332 Spectrum10273 scans: 11488

Data file I:\2013-9-14-Hela-Prometh-Fr10-ZW.mgf

Click mouse within plot area to zoom in by factor of two about that point

Or,   to  Da Label all possible matches  Label matches used for scoring 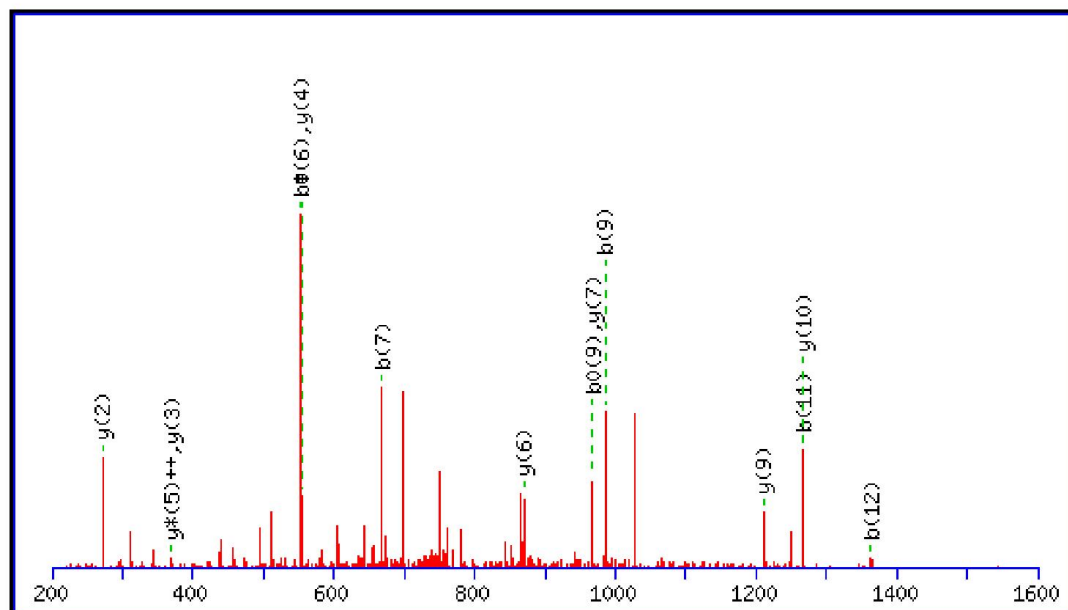**Monoisotopic mass of neutral peptide Mr(calc):** 1536.8281**Fixed modifications:** Carbamidomethyl (C) (apply to specified residues on terminal only)**Variable modifications:****K9** : Propionyl-(13CD3)Methyl (K)**K10** : Propionyl (K)**Ions Score:** 42 **Expect:** 0.054**Matches :** 15/124 fragment ions using 24 most intense peaks ([help](#))

| #  | b                | b <sup>++</sup> | b <sup>+</sup>  | b <sup>++</sup> | b <sup>0</sup>  | b <sup>0++</sup> | Seq. | y                | y <sup>++</sup> | y <sup>+</sup> | y <sup>++</sup> | y <sup>0</sup> | y <sup>0++</sup> | #  |
|----|------------------|-----------------|-----------------|-----------------|-----------------|------------------|------|------------------|-----------------|----------------|-----------------|----------------|------------------|----|
| 1  | 58.0287          | 29.5180         |                 |                 |                 |                  | G    |                  |                 |                |                 |                |                  | 13 |
| 2  | 214.1299         | 107.5686        | 197.1033        | 99.0533         |                 |                  | R    | 1480.8139        | 740.9106        | 1463.7874      | 732.3973        | 1462.8034      | 731.9053         | 12 |
| 3  | 271.1513         | 136.0793        | 254.1248        | 127.5660        |                 |                  | G    | 1324.7128        | 662.3601        | 1307.6863      | 654.3468        | 1306.7023      | 653.8548         | 11 |
| 4  | 328.1728         | 164.5900        | 311.1462        | 156.0768        |                 |                  | G    | <b>1267.6914</b> | 634.3493        | 1250.6648      | 625.8360        | 1249.6808      | 625.3440         | 10 |
| 5  | 443.1997         | 222.1035        | 426.1732        | 213.5902        | 425.1892        | 213.0982         | D    | <b>1210.6699</b> | 605.8386        | 1193.6434      | 597.3253        | 1192.6593      | 596.8333         | 9  |
| 6  | 571.2583         | 286.1328        | <b>554.2318</b> | 277.6195        | <b>553.2477</b> | 277.1275         | P    | 1095.6430        | 548.3251        | 1078.6164      | 539.8118        | 1077.6324      | 539.3198         | 8  |
| 7  | <b>668.3111</b>  | 334.6592        | 651.2845        | 326.1459        | 650.3005        | 325.6539         | Q    | <b>967.5844</b>  | 484.2958        | 950.5578       | 475.7826        | 949.5738       | 475.2905         | 7  |
| 8  | 783.3380         | 392.1726        | 766.3115        | 383.6594        | 765.3274        | 383.1674         | D    | <b>870.5316</b>  | 435.7694        | 853.5051       | 427.2562        | 852.5210       | 426.7642         | 6  |
| 9  | <b>985.4970</b>  | 493.2521        | 968.4705        | 484.7389        | <b>967.4865</b> | 484.2469         | K    | 755.5047         | 378.2560        | 738.4781       | <b>369.7427</b> |                |                  | 5  |
| 10 | 1169.6182        | 585.3127        | 1152.5916       | 576.7995        | 1151.6076       | 576.3075         | K    | <b>553.3457</b>  | 277.1765        | 536.3191       | 268.6632        |                |                  | 4  |
| 11 | <b>1266.6710</b> | 633.8391        | 1249.6444       | 625.3258        | 1248.6604       | 624.8338         | P    | <b>369.2245</b>  | 185.1159        | 352.1979       | 176.6026        |                |                  | 3  |
| 12 | <b>1363.7237</b> | 682.3655        | 1346.6972       | 673.8522        | 1345.7132       | 673.3602         | P    | <b>272.1717</b>  | 136.5895        | 255.1452       | 128.0762        |                |                  | 2  |
| 13 |                  |                 |                 |                 |                 |                  | R    | 175.1190         | 88.0631         | 158.0924       | 79.5498         |                |                  | 1  |

MS/MS Fragmentation of **LDLGEDYPSGKKR**Found in **043143**, Putative pre-mRNA-splicing factor ATP-dependent RNA helicase DHX15 OS=Homo sapiens GN=DHX15 PE=1 SV=2

Match to Query 8298: 1602.825648 from(802.420100,2+) intensity(50729.6211)

Title: File1332 Spectrum10904 scans: 12145

Data file I:\2013-9-14-Hela-Prometh-Fr10-ZW.mgf

Click mouse within plot area to zoom in by factor of two about that point

Or,   to  Da Label all possible matches  Label matches used for scoring 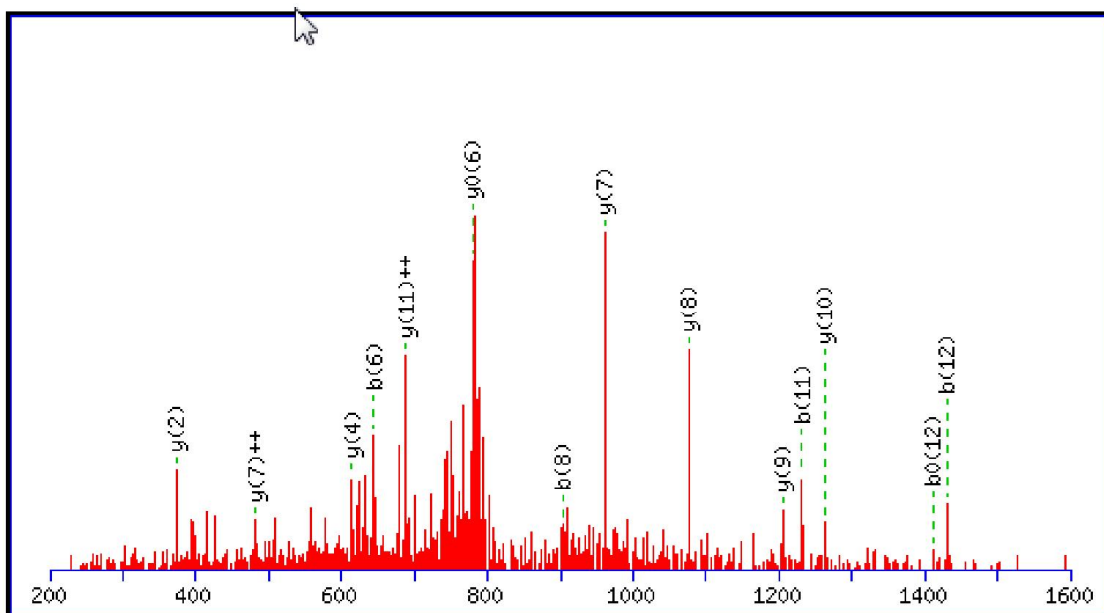Monoisotopic mass of neutral peptide **Mr(calc)**: 1602.8253

Fixed modifications: Carbamidomethyl (C) (apply to specified resi

Variable modifications:

**K11** : Propionyl (K)**K12** : Propionyl-Methylation (K)

Ions Score: 31 Expect: 0.76

Matches : 14/114 fragment ions using 27 most intense peaks [\(help\)](#)

| #  | b         | b <sup>++</sup> | b <sup>*</sup> | b <sup>++</sup> | b <sup>0</sup> | b <sup>0++</sup> | Seq. | y         | y <sup>++</sup> | y <sup>*</sup> | y <sup>++</sup> | y <sup>0</sup> | y <sup>0++</sup> | #        |    |
|----|-----------|-----------------|----------------|-----------------|----------------|------------------|------|-----------|-----------------|----------------|-----------------|----------------|------------------|----------|----|
| 1  | 114.0913  | 57.5493         |                |                 |                |                  | L    |           |                 |                |                 |                |                  | 13       |    |
| 2  | 229.1183  | 115.0628        |                |                 | 211.1077       | 106.0575         | D    | 1490.7486 | 745.8779        |                | 1473.7220       | 737.3646       | 1472.7380        | 736.8726 | 12 |
| 3  | 342.2023  | 171.6048        |                |                 | 324.1918       | 162.5995         | L    | 1375.7216 | 688.3644        |                | 1358.6951       | 679.8512       | 1357.7110        | 679.3592 | 11 |
| 4  | 399.2238  | 200.1155        |                |                 | 381.2132       | 191.1103         | G    | 1262.6375 | 631.8224        |                | 1245.6110       | 623.3091       | 1244.6270        | 622.8171 | 10 |
| 5  | 528.2664  | 264.6368        |                |                 | 510.2558       | 255.6316         | E    | 1205.6167 | 603.3117        |                | 1188.5895       | 594.7984       | 1187.6055        | 594.3064 | 9  |
| 6  | 643.2935  | 322.1503        |                |                 | 625.2828       | 313.1450         | D    | 1076.5735 | 538.7904        |                | 1059.5469       | 530.2771       | 1058.5629        | 529.7851 | 8  |
| 7  | 808.3567  | 403.6820        |                |                 | 788.3461       | 394.6767         | Y    | 961.5465  | 481.2769        |                | 944.5200        | 472.7636       | 943.5360         | 472.2716 | 7  |
| 8  | 903.4094  | 452.2084        |                |                 | 885.3989       | 443.2031         | P    | 796.4832  | 399.7452        |                | 781.4567        | 391.2320       | 780.4726         | 390.7400 | 6  |
| 9  | 990.4415  | 495.7244        |                |                 | 972.4309       | 486.7191         | S    | 701.4305  | 351.2189        |                | 684.4039        | 342.7056       | 683.4199         | 342.2136 | 5  |
| 10 | 1047.4629 | 524.2351        |                |                 | 1029.4524      | 515.2298         | G    | 614.3984  | 307.7028        |                | 597.3719        | 299.1896       |                  |          | 4  |
| 11 | 1231.5841 | 616.2957        | 1214.5576      | 607.7824        | 1213.5735      | 607.2904         | K    | 557.3770  | 279.1921        |                | 540.3504        | 270.6788       |                  |          | 3  |
| 12 | 1429.7209 | 715.3641        | 1412.6944      | 706.8508        | 1411.7104      | 706.3588         | K    | 373.2558  | 187.1315        |                | 356.2292        | 178.6183       |                  |          | 2  |
| 13 |           |                 |                |                 |                |                  | R    | 175.1190  | 88.0631         |                | 158.0924        | 79.5498        |                  |          | 1  |

MS/MS Fragmentation of **ASKDYSGFR**

Found in **G3XAA8**, La ribonucleoprotein domain family, member 4, isoform CRA\_j OS=Homo sapiens GN=LARP4 PE=2 SV=1

Match to Query 2199: 1099.528908 from(550.771730, 2+) intensity(348793.2813)

Title: File1332 Spectrum8043 scans: 9165

Data file I:\2013-9-14-Hela-Prometh-Fri10-ZW.mgf

Click mouse within plot area to zoom in by factor of two about that point

Or,   to  Da

Label all possible matches  Label matches used for scoring

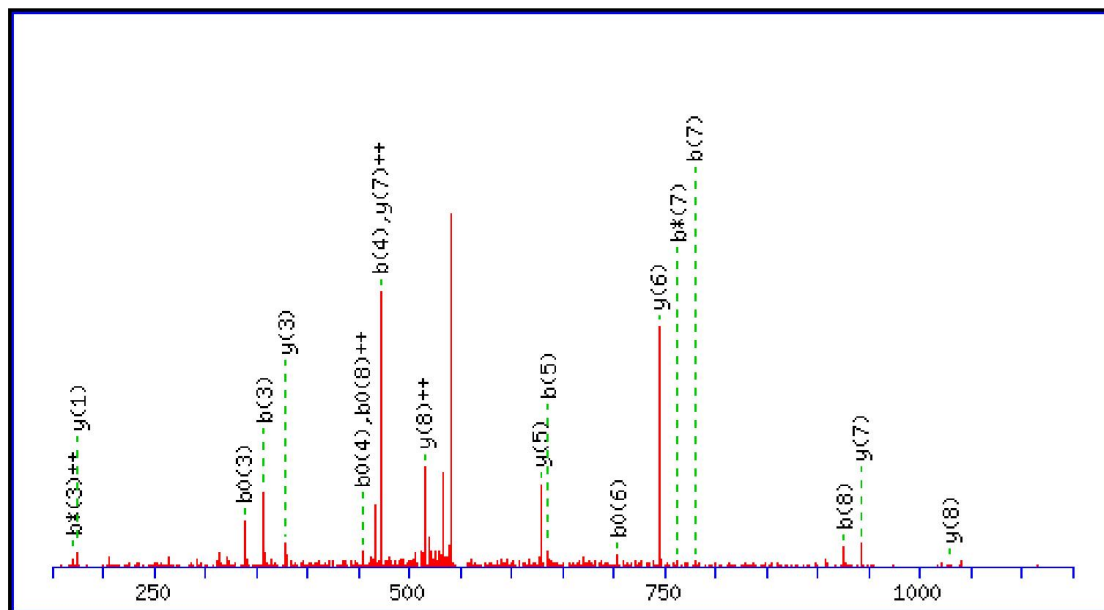

**Monoisotopic mass of neutral peptide Mr(calc):** 1099.5298

**Fixed modifications:** Carbamidomethyl (C) (apply to specified residues or termini only)

**Variable modifications:**

**K3** : Propionyl-Methylation (K)

**Ions Score:** 48 **Expect:** 0.0032

**Matches :** 19/84 fragment ions using 27 most intense peaks

| # | b               | b <sup>++</sup> | b*              | b <sup>+++</sup> | b <sup>0</sup>  | b <sup>0++</sup> | Seq. | y                | y <sup>++</sup> | y*        | y <sup>+++</sup> | y <sup>0</sup> | y <sup>0++</sup> | # |
|---|-----------------|-----------------|-----------------|------------------|-----------------|------------------|------|------------------|-----------------|-----------|------------------|----------------|------------------|---|
| 1 | 72.0444         | 36.5258         |                 |                  |                 |                  | A    |                  |                 |           |                  |                |                  | 9 |
| 2 | 159.0764        | 80.0418         |                 |                  | 141.0659        | 71.0366          | S    | <b>1029.5000</b> | <b>515.2536</b> | 1012.4734 | 506.7404         | 1011.4894      | 506.2483         | 8 |
| 3 | <b>357.2132</b> | 179.1103        | 340.1867        | <b>170.5970</b>  | <b>339.2027</b> | 170.1050         | K    | <b>942.4680</b>  | <b>471.7376</b> | 925.4414  | 463.2243         | 924.4574       | 462.7323         | 7 |
| 4 | <b>472.2402</b> | 236.6237        | 455.2136        | 228.1105         | <b>454.2296</b> | 227.6185         | D    | <b>744.3311</b>  | 372.6692        | 727.3046  | 364.1559         | 726.3206       | 363.6639         | 6 |
| 5 | <b>635.3035</b> | 318.1554        | 618.2770        | 309.6421         | 617.2930        | 309.1501         | Y    | <b>629.3042</b>  | 315.1557        | 612.2776  | 306.6425         | 611.2936       | 306.1504         | 5 |
| 6 | 722.3355        | 361.6714        | 705.3090        | 353.1581         | <b>704.3250</b> | 352.6661         | S    | 466.2409         | 233.6241        | 449.2143  | 225.1108         | 448.2303       | 224.6188         | 4 |
| 7 | <b>779.3570</b> | 390.1821        | <b>762.3305</b> | 381.6689         | 761.3464        | 381.1769         | G    | <b>379.2088</b>  | 190.1081        | 362.1823  | 181.5948         |                |                  | 3 |
| 8 | <b>926.4254</b> | 463.7164        | 909.3989        | 455.2031         | 908.4149        | <b>454.7111</b>  | F    | 322.1874         | 161.5973        | 305.1608  | 153.0840         |                |                  | 2 |
| 9 |                 |                 |                 |                  |                 |                  | R    | <b>175.1190</b>  | 88.0651         | 153.0924  | 79.5498          |                |                  | 1 |

Found in **Q8IYB7**, DIS3-like exonuclease 2 OS=Homo sapiens GN=DIS3L2 PE=1 SV=4

Match to Query 17621: 2429.267352 from(810.763060,3+) intensity(105384.4297)

Title: File1332 Spectrum8382 scans: 9518

Data file I:\2013-9-14-Hela-Prometh-Fr10-ZW.mgf

Click mouse within plot area to zoom in by factor of two about that point

Or,   to  Da Label all possible matches  Label matches used for scoring 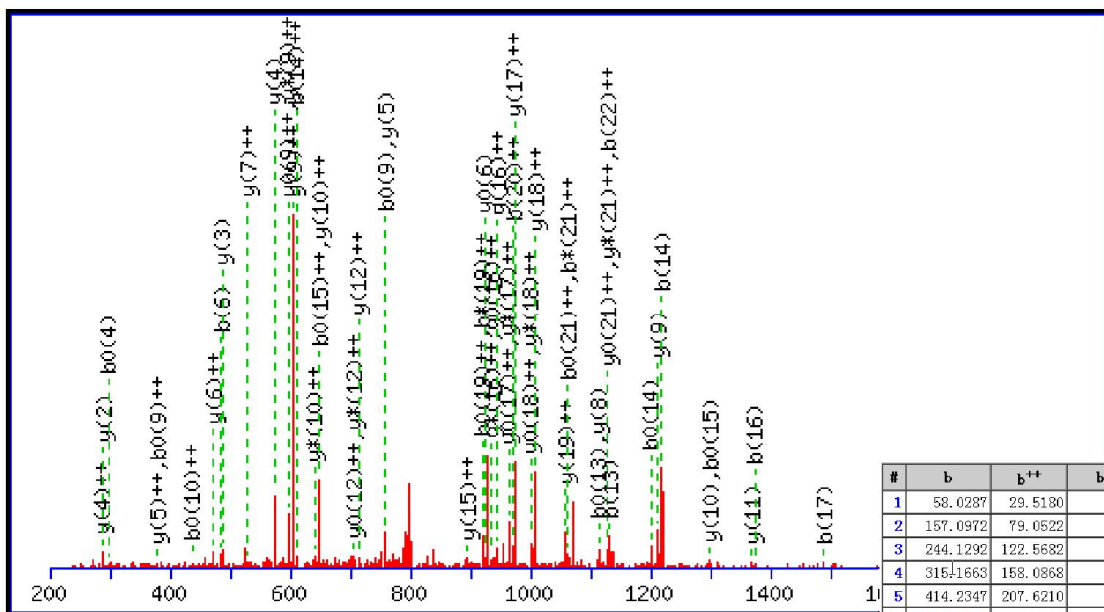

| #  | b                | b <sup>++</sup>  | b*               | b <sup>+++</sup> | b <sup>0</sup> | b <sup>0++</sup> | Seq. | y                | y <sup>++</sup> | y*        | y <sup>+++</sup> | y <sup>0</sup> | y <sup>0++</sup> | #  |
|----|------------------|------------------|------------------|------------------|----------------|------------------|------|------------------|-----------------|-----------|------------------|----------------|------------------|----|
| 1  | 58.0287          | 29.5180          |                  |                  |                |                  | G    |                  |                 |           |                  |                |                  | 23 |
| 2  | 157.0972         | 79.0522          |                  |                  |                |                  | V    | 2373.2521        | 1187.1297       | 2356.2255 | 1178.6164        | 2355.2415      | 1178.1244        | 22 |
| 3  | 244.1292         | 122.5682         |                  |                  | 226.1186       | 113.5629         | S    | 2274.1837        | 1137.5955       | 2257.1571 | 1129.0822        | 2256.1731      | 1128.5902        | 21 |
| 4  | 315-1663         | 158.0868         |                  |                  | 297.1557       | 149.0815         | A    | 2187.1517        | 1094.0795       | 2170.1251 | 1085.5662        | 2169.1411      | 1085.0742        | 20 |
| 5  | 414.2347         | 207.6210         |                  |                  | 396.2241       | 198.6157         | V    | 2116.1145        | 1058.5609       | 2099.0880 | 1050.0476        | 2098.1040      | 1049.5556        | 19 |
| 6  | <b>485.2718</b>  | 243.1395         |                  |                  | 467.2613       | 234.1343         | A    | 2017.0461        | 1009.0267       | 2000.0196 | 1000.5134        | 1999.0356      | 1000.0214        | 18 |
| 7  | 542.2933         | 271.6503         |                  |                  | 524.2827       | 262.6450         | G    | 1946.0090        | 973.5081        | 1928.9825 | 964.9949         | 1927.9985      | 964.5029         | 17 |
| 8  | 639.3461         | 320.1767         |                  |                  | 621.3355       | 311.1714         | P    | 1888.9876        | 944.9974        | 1871.9610 | 936.4841         | 1870.9770      | 935.9921         | 16 |
| 9  | 776.4050         | 388.7061         |                  |                  | 758.3944       | 379.7008         | H    | 1791.9348        | 896.4710        | 1774.9082 | 887.9578         | 1773.9242      | 887.4657         | 15 |
| 10 | 891.4319         | 446.2196         |                  |                  | 873.4213       | 437.2143         | D    | 1654.8759        | 827.9418        | 1637.8493 | 819.4283         | 1636.8653      | 818.9363         | 14 |
| 11 | 1004.5180        | 502.7616         |                  |                  | 986.5054       | 493.7563         | I    | 1539.8489        | 770.4281        | 1522.8224 | 761.9148         | 1521.8384      | 761.4228         | 13 |
| 12 | 1061.5374        | 531.2724         |                  |                  | 1043.5269      | 522.2671         | G    | 1426.7649        | 713.8961        | 1409.7383 | 705.3728         | 1408.7543      | 704.8908         | 12 |
| 13 | <b>1132.5745</b> | 566.7909         |                  |                  | 1114.5640      | 557.7856         | A    | <b>1369.7434</b> | 685.3753        | 1352.7169 | 676.8621         | 1351.7328      | 676.3701         | 11 |
| 14 | <b>1219.6066</b> | 610.3069         |                  |                  | 1201.5960      | 601.3016         | S    | <b>1298.7063</b> | 649.8568        | 1281.6797 | 641.3435         | 1280.6957      | 640.8515         | 10 |
| 15 | 1316.6593        | 658.8333         |                  |                  | 1298.6488      | 649.8280         | P    | <b>1311.6743</b> | 606.3408        | 1194.6477 | 597.8275         | 1193.6637      | 597.3355         | 9  |
| 16 | <b>1373.6808</b> | 687.3440         |                  |                  | 1355.6702      | 678.3388         | G    | <b>1114.6215</b> | 557.8144        | 1097.5949 | 549.3011         | 1096.6109      | 548.8091         | 8  |
| 17 | <b>1488.7077</b> | 744.8575         |                  |                  | 1470.6972      | 735.8522         | D    | 1057.6000        | 529.3037        | 1040.5735 | 520.7904         | 1039.5895      | 520.2984         | 7  |
| 18 | 1672.8289        | 836.9181         | <b>1655.8024</b> | 828.4048         | 1654.8184      | 827.9128         | K    | 942.5731         | 471.7902        | 925.5465  | 463.2769         | 924.5625       | 462.7849         | 6  |
| 19 | 1856.9501        | 928.9787         | 1839.9236        | <b>920.4654</b>  | 1838.9395      | 919.9734         | K    | <b>758.4519</b>  | 379.7296        | 741.4254  | 371.2163         | 740.4413       | 370.7243         | 5  |
| 20 | 1943.9821        | <b>972.4947</b>  | 1926.9556        | 963.9814         | 1925.9716      | 963.4894         | S    | <b>574.3307</b>  | 287.6690        | 557.3042  | 279.1557         | 556.3202       | 278.6637         | 4  |
| 21 | 2142.1190        | 1071.5631        | 2125.0924        | <b>1063.0498</b> | 2124.1084      | 1062.5578        | K    | <b>487.2987</b>  | 244.1530        | 470.2722  | 235.6397         |                |                  | 3  |
| 22 | 2256.1619        | <b>1128.5846</b> | 2239.1353        | 1120.0713        | 2238.1513      | 1119.5793        | N    | <b>289.1619</b>  | 145.0848        | 272.1353  | 136.5713         |                |                  | 2  |
| 23 |                  |                  |                  |                  |                |                  | R    | 175.1190         | 88.0631         | 158.0924  | 79.5498          |                |                  | 1  |

Monoisotopic mass of neutral peptide Mr(calc): 2429.2663

Fixed modifications: Carbamidomethyl (C) (apply to specified)

Variable modifications:

K18 : Propionyl (K)

K19 : Propionyl (K)

K21 : Propionyl-Methylation (K)

Ions Score: 48 Expect: 0.027

Matches : 56/220 fragment ions using 100 most intense peaks

Match to Query 466: 832.454808 from(417.234680,2+) intensity(115552.1172)

Title: File1332 SpecTrum4990 scans: 5984

Data file I:\2013-9-14-Hela-Prometh-Fr10-ZW.mgf

Click mouse within plot area to zoom in by factor of two about that point

Or,   to  Da Label all possible matches  Label matches used for scoring 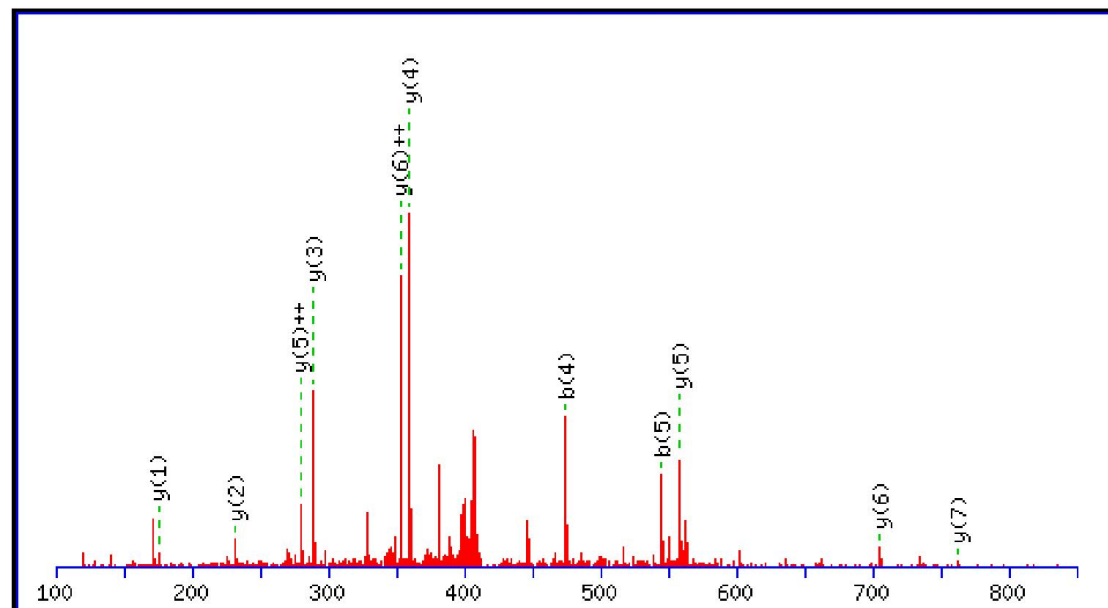**Monoisotopic mass of neutral peptide Mr(calc):** 832.4555**Fixed modifications:** Carbamidomethyl (C) (apply to specified residues only)**Variable modifications:****K4** : Propionyl-Methylation (K)**Ions Score:** 53 **Expect:** 0.0019**Matches** : 11/50 fragment ions using 21 most intense peaks ([help](#))

| # | b               | b <sup>++</sup> | b*       | b <sup>+++</sup> | Seq. | y               | y <sup>++</sup> | y*       | y <sup>+++</sup> | # |
|---|-----------------|-----------------|----------|------------------|------|-----------------|-----------------|----------|------------------|---|
| 1 | 72.0444         | 36.5258         |          |                  | A    |                 |                 |          |                  | 8 |
| 2 | 129.0659        | 65.0366         |          |                  | G    | <b>762.4257</b> | 381.7165        | 745.3992 | 373.2032         | 7 |
| 3 | 276.1343        | 138.5708        |          |                  | F    | <b>705.4042</b> | <b>353.2058</b> | 688.3777 | 344.6925         | 6 |
| 4 | <b>474.2711</b> | 237.6392        | 457.2445 | 229.1259         | K    | <b>558.3358</b> | <b>279.6715</b> | 541.3093 | 271.1583         | 5 |
| 5 | <b>545.3082</b> | 273.1577        | 528.2817 | 264.6445         | A    | <b>360.1990</b> | 180.6031        | 343.1724 | 172.0899         | 4 |
| 6 | 602.3297        | 301.6685        | 585.3031 | 293.1552         | G    | <b>289.1619</b> | 145.0846        | 272.1353 | 136.5713         | 3 |
| 7 | 659.3511        | 330.1792        | 642.3246 | 321.6659         | G    | <b>232.1404</b> | 116.5738        | 215.1139 | 108.0606         | 2 |
| 8 |                 |                 |          |                  | R    | <b>175.1190</b> | 88.0631         | 158.0924 | 79.5498          | 1 |

Match to Query 2331: 1115.656828 from(558.835690, 2+) intensity(200682.9688)

Title: File1332 Spectrum8287 scans: 9419

Data file I:\2013-9-14-Hela-Prometh-Fr10-ZW.mgf

Click mouse within plot area to zoom in by factor of two about that point

Or,   to  Da Label all possible matches  Label matches used for scoring 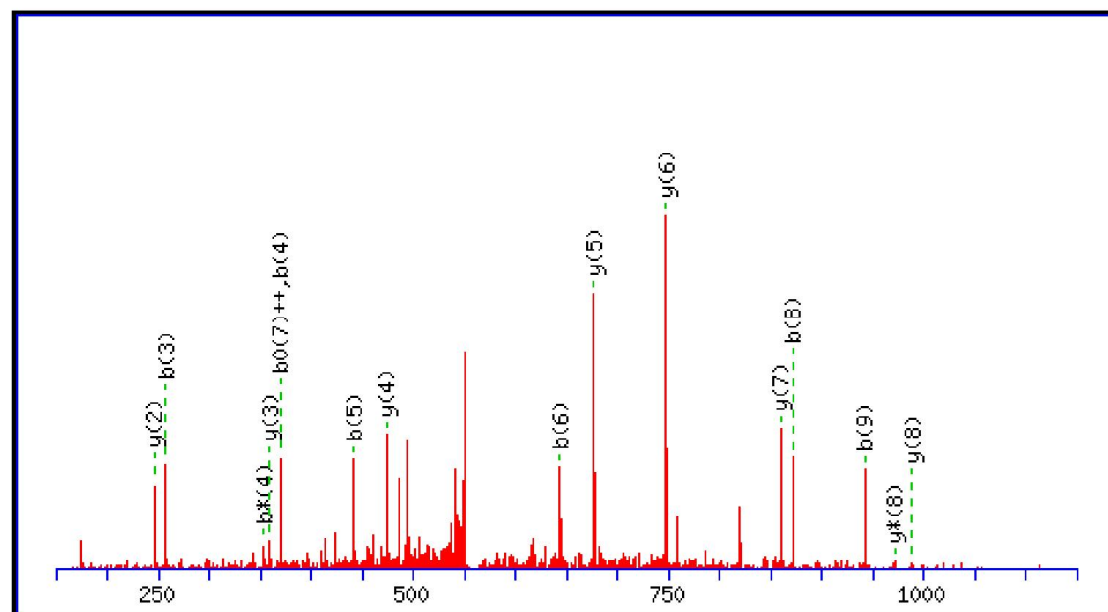**Monoisotopic mass of neutral peptide Mr(calc):** 1115.6571**Fixed modifications:** Carbamidomethyl (C) (apply to specified residues or termini only)**Variable modifications:****K6** : Propionyl-(13CD3)Methyl (K)**Ions Score:** 65 **Expect:** 0.00014**Matches** : 16/86 fragment ions using 19 most intense peaks (

| #  | b               | b <sup>++</sup> | b <sup>+</sup>  | b <sup>++</sup> | b <sup>0</sup> | b <sup>0++</sup> | Seq. | y               | y <sup>++</sup> | y <sup>+</sup>  | y <sup>++</sup> | y <sup>0</sup> | y <sup>0++</sup> | #  |
|----|-----------------|-----------------|-----------------|-----------------|----------------|------------------|------|-----------------|-----------------|-----------------|-----------------|----------------|------------------|----|
| 1  | 58.0287         | 29.5180         |                 |                 |                |                  | C    |                 |                 |                 |                 |                |                  | 10 |
| 2  | 129.0659        | 65.0366         |                 |                 |                |                  | A    | 1059.6430       | 530.3251        | 1042.6164       | 521.8118        | 1041.6324      | 521.3198         | 9  |
| 3  | <b>257.1244</b> | 129.0659        | 240.0979        | 120.5526        |                |                  | Q    | <b>988.6058</b> | 494.8066        | <b>971.5793</b> | 486.2933        | 970.5953       | 485.8013         | 8  |
| 4  | <b>370.2085</b> | 185.6079        | <b>353.1819</b> | 177.0913        |                |                  | L    | <b>860.5473</b> | 430.7773        | 843.5207        | 422.2640        | 842.5367       | 421.7720         | 7  |
| 5  | <b>441.2456</b> | 221.1264        | 424.2191        | 212.6132        |                |                  | A    | <b>747.4632</b> | 374.2352        | 730.4367        | 365.7220        | 729.4526       | 365.2300         | 6  |
| 6  | <b>643.4046</b> | 322.2059        | 626.3781        | 313.6927        |                |                  | K    | <b>676.4261</b> | 338.7167        | 659.3995        | 330.2034        | 658.4155       | 329.7114         | 5  |
| 7  | 758.4316        | 379.7194        | 741.4050        | 371.2061        | 740.4210       | <b>370.7141</b>  | D    | <b>474.2671</b> | 237.6372        | 457.2405        | 229.1239        | 456.2565       | 228.6319         | 4  |
| 8  | <b>871.5156</b> | 436.2615        | 854.4891        | 427.7482        | 853.5051       | 427.2562         | I    | <b>359.2401</b> | 180.1237        | 342.2136        | 171.6104        |                |                  | 3  |
| 9  | <b>942.5527</b> | 471.7800        | 925.5262        | 463.2667        | 924.5422       | 462.7747         | A    | <b>246.1561</b> | 123.5817        | 229.1295        | 115.0684        |                |                  | 2  |
| 10 |                 |                 |                 |                 |                |                  | R    | 175.1190        | 88.0631         | 158.0924        | 79.5498         |                |                  | 1  |



Found in **P51608**, Methyl-CpG-binding protein 2 OS=Homo sapiens GN=MECP2 PE=1 SV=1

Match to Query 6792: 1284.703948 from(643.359250,2+) intensity(320897.4375)

Title: File1335 Spectrum6402 scans: 7141

Data file I:\2013-9-14-Hela-Prometh-Fr8-ZW.mgf

Click mouse within plot area to zoom in by factor of two about that point

Or,   to  Da Label all possible matches  Label matches used for scoring 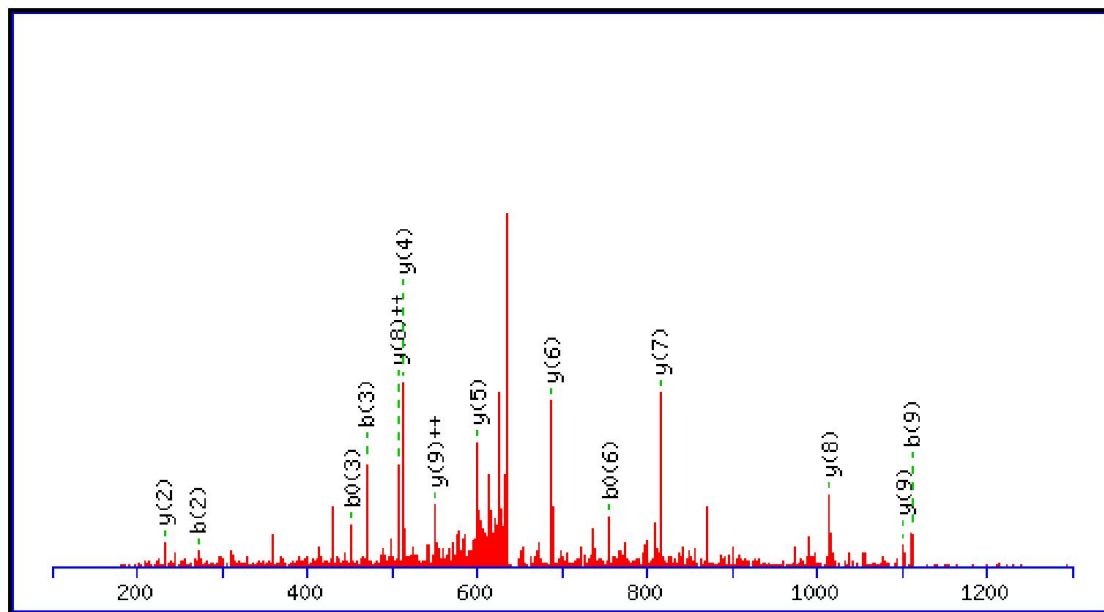

Monoisotopic mass of neutral peptide Mr(calc): 1284.7037

Fixed modifications: Carbamidomethyl (C) (apply to specified residue)

Variable modifications:

K1 : Propionyl (K)

K3 : Propionyl-Methylation (K)

K8 : Propionyl (K)

Ions Score: 37 Expect: 0.15

Matches : 14/98 fragment ions using 33 most intense peaks ([help](#))

| #  | b                | b <sup>++</sup> | b <sup>*</sup> | b <sup>+++</sup> | b <sup>0</sup>  | b <sup>0++</sup> | Seq. | y                | y <sup>++</sup> | y <sup>*</sup> | y <sup>+++</sup> | y <sup>0</sup> | y <sup>0++</sup> | #  |
|----|------------------|-----------------|----------------|------------------|-----------------|------------------|------|------------------|-----------------|----------------|------------------|----------------|------------------|----|
| 1  | 185.1285         | 93.0679         | 168.1019       | 84.5546          |                 |                  | K    |                  |                 |                |                  |                |                  | 10 |
| 2  | <b>272.1605</b>  | 136.5839        | 255.1339       | 128.0706         | 254.1499        | 127.5786         | S    | <b>101.5899</b>  | <b>551.2986</b> | 1084.5633      | 542.7853         | 1083.5793      | 542.2933         | 9  |
| 3  | <b>470.1973</b>  | 235.6523        | 453.2708       | 227.1390         | <b>452.2867</b> | 226.6470         | K    | <b>1014.5578</b> | <b>507.7826</b> | 997.5313       | 499.2693         | 996.5473       | 498.7773         | 8  |
| 4  | 599.3399         | 300.1736        | 582.3134       | 291.6603         | 581.3293        | 291.1683         | E    | <b>816.4210</b>  | 408.7141        | 799.3945       | 400.2009         | 798.4104       | 399.7089         | 7  |
| 5  | 686.3719         | 343.6896        | 669.3454       | 335.1763         | 668.3614        | 334.6843         | S    | <b>687.3784</b>  | 344.1928        | 670.3519       | 335.6796         | 669.3678       | 335.1876         | 6  |
| 6  | 773.4040         | 387.2056        | 756.3774       | 378.6923         | <b>755.3934</b> | 378.2003         | S    | <b>600.3464</b>  | 300.6768        | 583.3198       | 292.1636         | 582.3358       | 291.6715         | 5  |
| 7  | 870.4567         | 435.7320        | 853.4302       | 427.2187         | 852.4462        | 426.7267         | P    | <b>513.3144</b>  | 257.1608        | 496.2878       | 248.6475         |                |                  | 4  |
| 8  | 1054.5779        | 527.7926        | 1037.5514      | 519.2793         | 1036.5673       | 518.7873         | K    | 416.2616         | 208.6344        | 399.2350       | 200.1212         |                |                  | 3  |
| 9  | <b>1111.5994</b> | 556.3033        | 1094.5728      | 547.7900         | 1093.5888       | 547.2980         | G    | <b>232.1404</b>  | 116.5738        | 215.1139       | 108.0606         |                |                  | 2  |
| 10 |                  |                 |                |                  |                 |                  | R    | 175.1190         | 88.0631         | 158.0924       | 79.5498          |                |                  | 1  |

Match to Query 9205: 1606.867288 from(804.440920,2+) intensity(470954.3125)

Title: File1311 Spectrum7603 scans: 8199

Data file I:\2013-9-13-Hela-Prometh-Fr7-ZW.mgf

Click mouse within plot area to zoom in by factor of two about that point

Or,   to  Da Label all possible matches  Label matches used for scoring 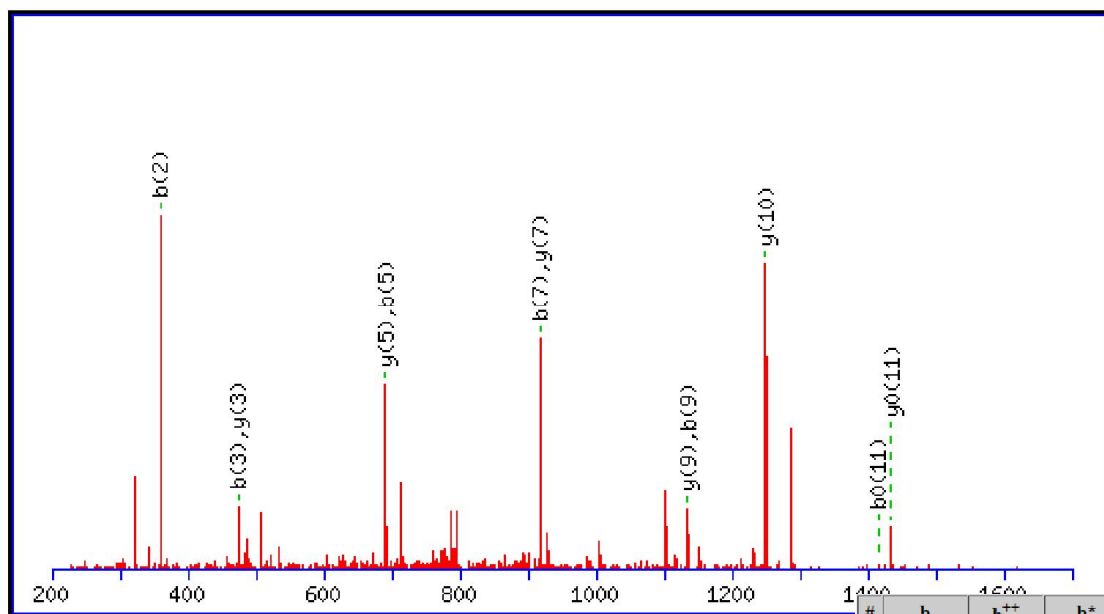

Monoisotopic mass of neutral peptide Mr(calc): 1606.8

Fixed modifications: Carbamidomethyl (C) (apply to sp

Variable modifications:

K2 : Propionyl-(13CD3)Methyl (K)

K11 : Propionyl-(13CD3)Methyl (K)

Ions Score: 38 Expect: 0.16

Matches : 13/122 fragment ions using 14 most intense

| #  | b                | b <sup>++</sup> | b <sup>+</sup> | b <sup>+++</sup> | b <sup>0</sup>   | b <sup>0++</sup> | Seq. | y                | y <sup>++</sup> | y <sup>+</sup> | y <sup>+++</sup> | y <sup>0</sup>   | y <sup>0++</sup> | #  |
|----|------------------|-----------------|----------------|------------------|------------------|------------------|------|------------------|-----------------|----------------|------------------|------------------|------------------|----|
| 1  | 157.1084         | 79.0578         | 140.0818       | 70.5446          |                  |                  | R    |                  |                 |                |                  |                  |                  | 12 |
| 2  | <b>359.2674</b>  | 180.1373        | 342.2409       | 171.6241         |                  |                  | K    | 1451.7769        | 726.3921        | 1434.7504      | 717.8788         | <b>1433.7664</b> | 717.3868         | 11 |
| 3  | <b>474.2943</b>  | 237.6508        | 457.2678       | 229.1375         | 456.2838         | 228.6455         | D    | <b>1249.6179</b> | 625.3126        | 1232.5914      | 616.7993         | 1231.6074        | 616.3073         | 10 |
| 4  | 575.3420         | 288.1746        | 558.3155       | 279.6614         | 557.3315         | 279.1694         | T    | <b>1134.5910</b> | 567.7991        | 1117.5644      | 559.2859         | 1116.5804        | 558.7938         | 9  |
| 5  | <b>690.3690</b>  | 345.6881        | 673.3424       | 337.1748         | 672.3584         | 336.6828         | D    | 1033.5433        | 517.2753        | 1016.5168      | 508.7620         | 1015.5327        | 508.2700         | 8  |
| 6  | 805.3959         | 403.2016        | 788.3694       | 394.6883         | 787.3853         | 394.1963         | D    | <b>918.5164</b>  | 459.7618        | 901.4898       | 451.2485         | 900.5058         | 450.7565         | 7  |
| 7  | <b>918.4800</b>  | 459.7436        | 901.4534       | 451.2303         | 900.4694         | 450.7383         | I    | 803.4894         | 402.2483        | 786.4629       | 393.7351         | 785.4788         | 393.2431         | 6  |
| 8  | 1047.5226        | 524.2649        | 1030.4960      | 515.7516         | 1029.5120        | 515.2596         | E    | <b>690.4054</b>  | 345.7063        | 673.3788       | 337.1930         | 672.3948         | 336.7010         | 5  |
| 9  | <b>1134.5546</b> | 567.7809        | 1117.5280      | 559.2677         | 1116.5440        | 558.7757         | S    | 561.3628         | 281.1850        | 544.3362       | 272.6717         | 543.3522         | 272.1797         | 4  |
| 10 | 1231.6074        | 616.3073        | 1214.5808      | 607.7940         | 1213.5968        | 607.3020         | P    | <b>474.3307</b>  | 237.6690        | 457.3042       | 229.1557         |                  |                  | 3  |
| 11 | <b>1433.7664</b> | 717.3868        | 1416.7398      | 708.8735         | <b>1415.7558</b> | 708.3815         | K    | 377.2780         | 189.1426        | 360.2514       | 180.6293         |                  |                  | 2  |
| 12 |                  |                 |                |                  |                  |                  | R    | 175.1190         | 88.0631         | 158.0924       | 79.5498          |                  |                  | 1  |

Match to Query 18308: 2428.162208 from(1215.088380,2+) intensity(122499.4766)

Title: File1319 Spectrum17600 scans: 18605

Data file I:\2013-9-13-Hela-Prometh-Fr2-ZW.mgf

Click mouse within plot area to zoom in by factor of two about that point

Or,  300  2000  Label all possible matches  Label matches used for scoring 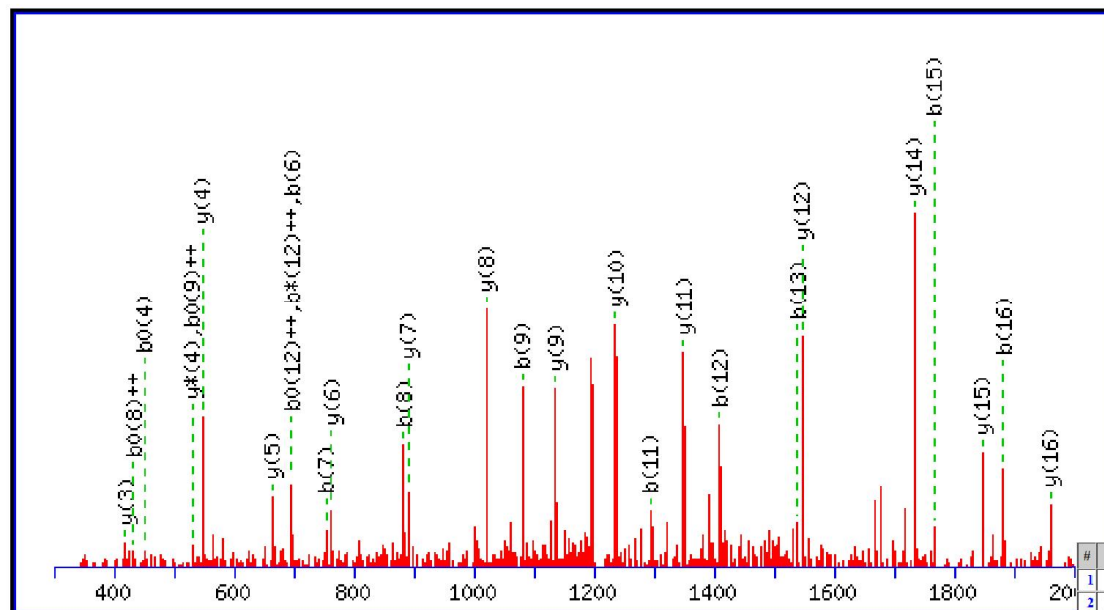

Monoisotopic mass of neutral peptide Mr(calc) : 2428.1614

Fixed modifications: Carbamidomethyl (C) (apply to specified residue)

Variable modifications:

K9 : Propionyl-Methylation (K)

Ions Score: 100 Expect: 7.8e-008

Matches : 28/208 fragment ions using 34 most intense peaks [\(help\)](#)

| #  | b         | b <sup>++</sup> | b <sup>*</sup> | b <sup>++</sup> | b <sup>0</sup> | b <sup>0++</sup> | Seq. | y         | y <sup>++</sup> | y <sup>*</sup> | y <sup>++</sup> | y <sup>0</sup> | y <sup>0++</sup> | #  |
|----|-----------|-----------------|----------------|-----------------|----------------|------------------|------|-----------|-----------------|----------------|-----------------|----------------|------------------|----|
| 1  | 138.0662  | 69.5367         |                |                 |                |                  | H    |           |                 |                |                 |                |                  | 20 |
| 2  | 237.1346  | 119.0709        |                |                 |                |                  | V    | 2292.1098 | 1146.5585       | 2275.0832      | 1138.0453       | 2274.0992      | 1137.5532        | 19 |
| 3  | 368.1751  | 184.5912        |                |                 |                |                  | M    | 2193.0414 | 1097.0243       | 2176.0148      | 1088.5110       | 2175.0308      | 1088.0190        | 18 |
| 4  | 469.2228  | 235.1150        |                |                 | 451.2122       | 226.1097         | T    | 2062.0009 | 1031.5041       | 2044.9743      | 1022.9908       | 2043.9903      | 1022.4988        | 17 |
| 5  | 583.2657  | 292.1365        | 566.2391       | 283.6232        | 565.2551       | 283.1312         | N    | 1960.9532 | 980.9802        | 1943.9267      | 972.4670        | 1942.9426      | 971.9750         | 16 |
| 6  | 696.3498  | 348.6785        | 679.3232       | 340.1652        | 678.3392       | 339.6732         | L    | 1846.9103 | 923.9588        | 1829.8837      | 915.4455        | 1828.8997      | 914.9535         | 15 |
| 7  | 753.3712  | 377.1892        | 736.3447       | 368.6760        | 735.3607       | 368.1840         | G    | 1733.8262 | 867.4167        | 1716.7997      | 858.9035        | 1715.8156      | 858.4115         | 14 |
| 8  | 882.4138  | 441.7105        | 865.3873       | 433.1973        | 864.4032       | 432.7053         | E    | 1676.8047 | 838.9060        | 1659.7782      | 830.3927        | 1658.7942      | 829.9007         | 13 |
| 9  | 1080.5506 | 540.7790        | 1063.5241      | 532.2657        | 1062.5401      | 531.7737         | K    | 1547.7622 | 774.3847        | 1530.7356      | 765.8714        | 1529.7516      | 765.3794         | 12 |
| 10 | 1193.6347 | 597.3210        | 1176.6082      | 588.8077        | 1175.6241      | 588.3157         | L    | 1349.6253 | 675.3163        | 1332.5988      | 666.8030        | 1331.6148      | 666.3110         | 11 |
| 11 | 1294.6824 | 647.8448        | 1277.6558      | 639.3316        | 1276.6718      | 638.8395         | T    | 1236.5413 | 618.7743        | 1219.5147      | 610.2610        | 1218.5307      | 609.7690         | 10 |
| 12 | 1409.7093 | 705.3583        | 1392.6828      | 696.8450        | 1391.6988      | 696.3530         | D    | 1135.4936 | 568.2504        | 1118.4670      | 559.7372        | 1117.4830      | 559.2451         | 9  |
| 13 | 1538.7519 | 769.8796        | 1521.7254      | 761.3663        | 1520.7414      | 760.8743         | E    | 1020.4066 | 510.7370        | 1003.4401      | 502.2237        | 1002.4561      | 501.7317         | 8  |
| 14 | 1667.7945 | 834.4009        | 1650.7680      | 825.8876        | 1649.7839      | 825.3956         | E    | 891.4240  | 446.2157        | 874.3975       | 437.7024        | 873.4135       | 437.2104         | 7  |
| 15 | 1766.8629 | 883.9351        | 1749.8364      | 875.4218        | 1748.8524      | 874.9298         | V    | 762.3815  | 381.6944        | 745.3549       | 373.1811        | 744.3709       | 372.6891         | 6  |
| 16 | 1881.8899 | 941.4486        | 1864.8633      | 932.9353        | 1863.8793      | 932.4433         | D    | 663.3130  | 332.1602        | 646.2865       | 323.6469        | 645.3025       | 323.1549         | 5  |
| 17 | 2010.9325 | 1005.9699       | 1993.9059      | 997.4566        | 1992.9219      | 996.9646         | E    | 548.2861  | 274.6467        | 531.2595       | 266.1334        | 530.2755       | 265.6414         | 4  |
| 18 | 2141.9729 | 1071.4901       | 2124.9464      | 1062.9768       | 2123.9624      | 1062.4848        | M    | 419.2435  | 210.1254        | 402.2170       | 201.6121        |                |                  | 3  |
| 19 | 2255.0570 | 1128.0321       | 2238.0305      | 1119.5189       | 2237.0464      | 1119.0269        | I    | 288.2030  | 144.6051        | 271.1765       | 136.0919        |                |                  | 2  |
| 20 |           |                 |                |                 |                |                  | R    | 175.1190  | 88.0631         | 158.0924       | 79.5498         |                |                  | 1  |

Match to Query 10736: 1723.880108 from(862.947330,2+) intensity(604150.8125)

Title: File1319 Spectrum16970 scans: 17949

Data file I:\2013-9-13-Hela-Prometh-Fr2-ZW.mgf

Click mouse within plot area to zoom in by factor of two about that point

Or,  200  1800  Label all possible matches  Label matches used for scoring 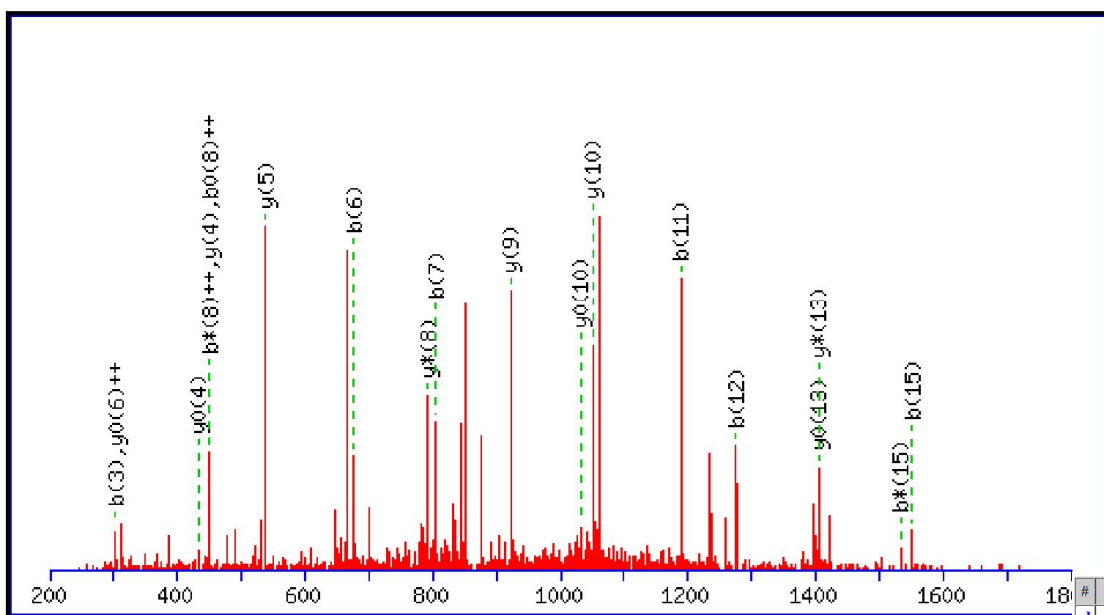

Monoisotopic mass of neutral peptide Mr(calc): 1723.8861

Fixed modifications: Carbamidomethyl (C) (apply to specified residues)

Variable modifications:

K5 : Propionyl-(13CD3)Methyl (K)

Ions Score: 27 Expect: 1.6

Matches : 19/176 fragment ions using 30 most intense peaks ([help](#))

| #  | b                | b <sup>++</sup> | b <sup>*</sup>   | b <sup>+++</sup> | b <sup>0</sup> | b <sup>0++</sup> | Seq. | y                | y <sup>++</sup> | y <sup>*</sup>   | y <sup>+++</sup> | y <sup>0</sup>   | y <sup>0++</sup> | #  |
|----|------------------|-----------------|------------------|------------------|----------------|------------------|------|------------------|-----------------|------------------|------------------|------------------|------------------|----|
| 1  | 115.0502         | 58.0287         | 98.0237          | 49.5155          |                |                  | N    |                  |                 |                  |                  |                  |                  | 16 |
| 2  | 216.0979         | 108.5526        | 199.0713         | 100.0393         | 198.0873       | 99.5473          | T    | 1610.8504        | 805.9289        | 1593.8239        | 797.4156         | 1592.8399        | 796.9236         | 15 |
| 3  | <b>303.1299</b>  | 152.0686        | 286.1034         | 143.5553         | 285.1193       | 143.0633         | S    | 1509.8028        | 755.4050        | 1492.7762        | 746.8917         | 1491.7922        | 746.3997         | 14 |
| 4  | 374.1670         | 187.5872        | 357.1405         | 179.0739         | 356.1565       | 178.5819         | A    | 1422.7707        | 711.8890        | <b>1405.7442</b> | 703.3757         | <b>1404.7602</b> | 702.8837         | 13 |
| 5  | 576.3260         | 288.6667        | 559.2995         | 280.1534         | 558.3155       | 279.6614         | K    | 1351.7336        | 676.3704        | 1334.7071        | 667.8572         | 1333.7231        | 667.3652         | 12 |
| 6  | <b>675.3945</b>  | 338.2009        | 658.3679         | 329.6876         | 657.3839       | 329.1956         | V    | 1149.5746        | 575.2909        | 1132.5481        | 566.7777         | 1131.5640        | 566.2857         | 11 |
| 7  | <b>804.4370</b>  | 402.7222        | 787.4105         | 394.2089         | 786.4265       | 393.7169         | E    | <b>1050.5062</b> | 525.7567        | 1033.4796        | 517.2435         | <b>1032.4956</b> | 516.7515         | 10 |
| 8  | 917.5211         | 459.2642        | 900.4946         | <b>450.7509</b>  | 899.5105       | <b>450.2589</b>  | L    | <b>921.4636</b>  | 461.2354        | 904.4371         | 452.7222         | 903.4530         | 452.2302         | 9  |
| 9  | 1014.5739        | 507.7906        | 997.5473         | 499.2773         | 996.5633       | 498.7853         | P    | 808.3795         | 404.6934        | <b>791.3530</b>  | 396.1801         | 790.3690         | 395.6881         | 8  |
| 10 | 1101.6059        | 551.3066        | 1084.5794        | 542.7933         | 1083.5953      | 542.3013         | S    | 711.3268         | 356.1670        | 694.3002         | 347.6537         | 693.3162         | 347.1617         | 7  |
| 11 | <b>1188.6379</b> | 594.8226        | 1171.6114        | 586.3093         | 1170.6274      | 585.8173         | S    | 624.2947         | 312.6510        | 607.2682         | 304.1377         | 606.2842         | <b>303.6457</b>  | 6  |
| 12 | <b>1275.6700</b> | 638.3386        | 1258.6434        | 629.8253         | 1257.6594      | 629.3333         | S    | <b>537.2627</b>  | 269.1350        | 520.2362         | 260.6217         | 519.2522         | 260.1297         | 5  |
| 13 | 1376.7176        | 688.8625        | 1359.6911        | 680.3492         | 1358.7071      | 679.8572         | T    | <b>450.2307</b>  | 225.6190        | 433.2041         | 217.1057         | <b>432.2201</b>  | 216.6137         | 4  |
| 14 | 1463.7497        | 732.3785        | 1446.7231        | 723.8652         | 1445.7391      | 723.3732         | S    | 349.1830         | 175.0951        | 332.1565         | 166.5819         | 331.1724         | 166.0899         | 3  |
| 15 | <b>1550.7817</b> | 775.8945        | <b>1533.7551</b> | 767.3812         | 1532.7711      | 766.8892         | S    | 262.1510         | 131.5791        | 245.1244         | 123.0659         | 244.1404         | 122.5738         | 2  |
| 16 |                  |                 |                  |                  |                |                  | R    | 175.1190         | 88.0631         | 158.0924         | 79.5498          |                  |                  | 1  |

Match to Query 1462: 937.631628 from(469.823090, 2+) intensity(159232.7188)

Title: File1359 Spectrum23072 scans: 24416

Data file J:\2013-9-14-A549-Prometh-Fr7-ZW.mgf

Click mouse within plot area to zoom in by factor of two about that point

Or,   to  Da Label all possible matches  Label matches used for scoring 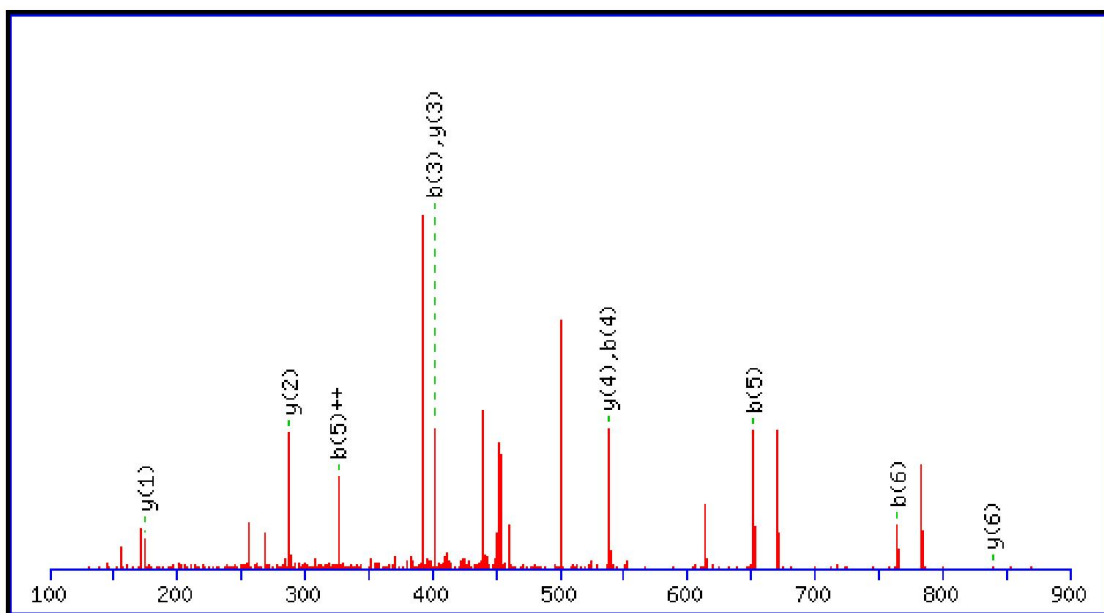**Monoisotopic mass of neutral peptide Mr(calc):** 937.6346**Fixed modifications:** Carbamidomethyl (C) (apply to specified residues or termini only)**Variable modifications:**

K3 : Propionyl-(13CD3)Methyl (K)

**Ions Score:** 25 **Expect:** 0.17**Matches :** 10/44 fragment ions using 16 most intense peaks ([help](#))

| # | b               | b <sup>++</sup> | b*       | b <sup>*++</sup> | Seq. | y               | y <sup>++</sup> | y*       | y <sup>*++</sup> | # |
|---|-----------------|-----------------|----------|------------------|------|-----------------|-----------------|----------|------------------|---|
| 1 | 100.0757        | 50.5415         |          |                  | V    |                 |                 |          |                  | 7 |
| 2 | 199.1441        | 100.0757        |          |                  | V    | <b>839.5734</b> | 420.2903        | 822.5469 | 411.7771         | 6 |
| 3 | <b>401.3031</b> | 201.1552        | 384.2766 | 192.6419         | K    | 740.5050        | 370.7561        | 723.4785 | 362.2429         | 5 |
| 4 | <b>538.3620</b> | 269.6847        | 221.3355 | 261.1714         | H    | <b>538.3460</b> | 269.6766        | 521.3194 | 261.1634         | 4 |
| 5 | <b>651.4461</b> | <b>326.2267</b> | 634.4195 | 317.7134         | L    | <b>401.2871</b> | 201.1472        | 384.2605 | 192.6339         | 3 |
| 6 | <b>764.5302</b> | 382.7687        | 747.5036 | 374.2554         | I    | <b>288.2030</b> | 144.6051        | 271.1765 | 136.0919         | 2 |
| 7 |                 |                 |          |                  | R    | <b>175.1190</b> | 88.0631         | 158.0924 | 79.5498          | 1 |

Found in Q7Z478, ATP-dependent RNA helicase DHX29 OS=Homo sapiens GN=DHX29 PE=1 SV=2

Match to Query 14229: 2170.185762 from(724.402530, 3+) intensity(27088.4707)

Title: File1359 Spectrum10130 scans: 10868

Data file J:\2013-9-14-A549-Prometh-Fr7-ZW.mgf

Click mouse within plot area to zoom in by factor of two about that point

Or,   to  Da Label all possible matches  Label matches used for scoring 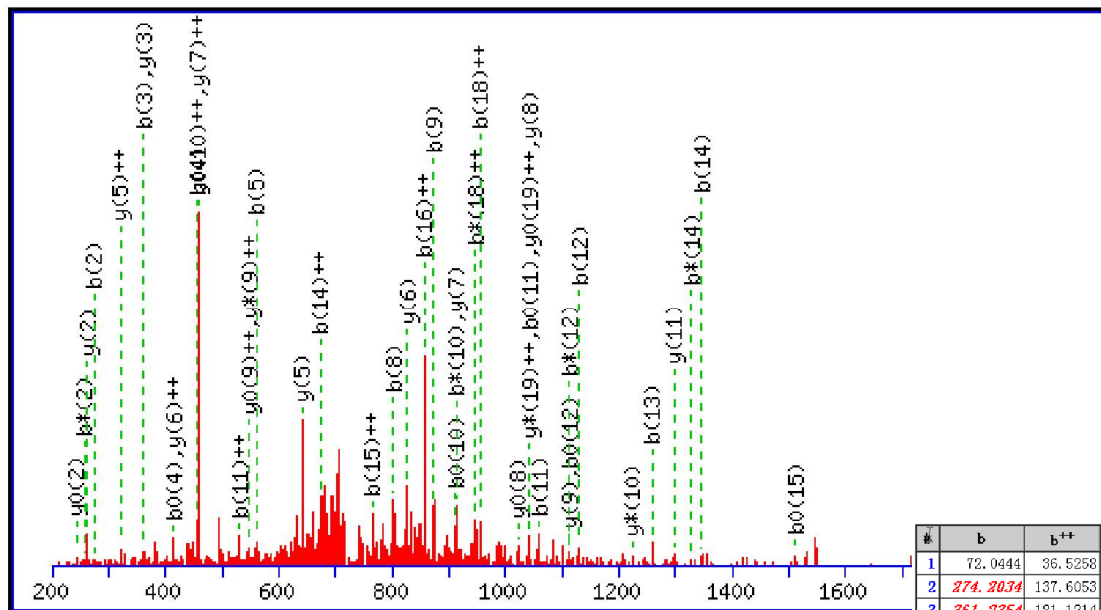

Monoisotopic mass of neutral peptide Mr(calc): 2170.1866

Fixed modifications: Carbamidomethyl (C) (apply to specified)

Variable modifications:

K2 : Propionyl-(13CD3)Methyl (K)

K15 : Propionyl (K)

K16 : Propionyl (K)

Ions Score: 42 Expect: 0.044

Matches : 45/220 fragment ions using 73 most intense peaks (h)

| #  | b                | b <sup>++</sup> | b*               | b <sup>++</sup> | b <sup>0</sup>   | b <sup>0++</sup> | Seq. | y                | y <sup>++</sup> | y*               | y <sup>++</sup>  | y <sup>0</sup>   | y <sup>0++</sup> | #  |
|----|------------------|-----------------|------------------|-----------------|------------------|------------------|------|------------------|-----------------|------------------|------------------|------------------|------------------|----|
| 1  | 72.0444          | 36.5258         |                  |                 |                  |                  | A    |                  |                 |                  |                  |                  |                  | 20 |
| 2  | <b>274.2034</b>  | 137.6053        | <b>257.1769</b>  | 129.0921        |                  |                  | K    | 2100.1568        | 1050.5820       | 2083.1302        | <b>1042.0688</b> | 2082.1462        | <b>1041.5768</b> | 19 |
| 3  | <b>361.2354</b>  | 181.1214        | 344.2089         | 172.6081        | 343.2249         | 172.1161         | S    | 1897.9978        | 949.5025        | 1880.9712        | 940.9893         | 1879.9872        | 940.4972         | 18 |
| 4  | 432.2725         | 216.6399        | 415.2460         | 208.1266        | <b>414.2620</b>  | 207.6346         | A    | 1810.9658        | 905.9865        | 1793.9392        | 897.4732         | 1792.9552        | 896.9812         | 17 |
| 5  | <b>561.3151</b>  | 281.1612        | 544.2886         | 272.6479        | 543.3046         | 272.1559         | E    | 1739.9286        | 870.4680        | 1722.9021        | 861.9547         | 1721.9181        | 861.4627         | 16 |
| 6  | 632.3523         | 316.6798        | 615.3257         | 308.1665        | 614.3417         | 307.6745         | A    | 1610.8860        | 805.9467        | 1593.8595        | 797.4334         | 1592.8755        | 796.9414         | 15 |
| 7  | 689.3737         | 345.1905        | 672.3472         | 336.6772        | 671.3632         | 336.1852         | G    | 1539.8489        | 770.4281        | 1522.8224        | 761.9148         | 1521.8384        | 761.4228         | 14 |
| 8  | <b>802.4578</b>  | 401.7325        | 785.4312         | 393.2193        | 784.4472         | 392.7272         | I    | 1482.8275        | 741.9174        | 1465.8009        | 733.4041         | 1464.8169        | 732.9121         | 13 |
| 9  | <b>873.4949</b>  | 437.2511        | 856.4683         | 428.7378        | 855.4843         | 428.2458         | A    | 1369.7434        | 685.3753        | 1352.7169        | 676.8621         | 1351.7328        | 676.3701         | 12 |
| 10 | 930.5164         | 465.7618        | <b>913.4898</b>  | <b>457.2485</b> | <b>912.5058</b>  | <b>456.7565</b>  | G    | <b>1298.7063</b> | 649.8568        | 1281.6797        | 641.3435         | 1280.6957        | 640.8515         | 11 |
| 11 | <b>1059.5590</b> | <b>530.2831</b> | 1042.5324        | 521.7698        | <b>1041.5484</b> | 521.2778         | E    | 1241.6848        | 621.3461        | <b>1224.6583</b> | 612.8328         | 1223.6743        | 612.3408         | 10 |
| 12 | <b>1130.5961</b> | 565.8017        | <b>1113.5695</b> | 557.2884        | <b>1112.5855</b> | 556.7964         | A    | <b>1112.6422</b> | 556.8248        | 1095.6157        | <b>548.3115</b>  | 1094.6317        | <b>547.8195</b>  | 9  |
| 13 | <b>1258.6546</b> | 629.8310        | 1241.6281        | 621.3177        | 1240.6441        | 620.8257         | Q    | <b>1041.6051</b> | 521.3062        | 1024.5786        | 512.7929         | <b>1023.5946</b> | 512.3009         | 8  |
| 14 | <b>1345.6867</b> | <b>673.3470</b> | <b>1328.6601</b> | 664.8337        | 1327.6761        | 664.3417         | S    | <b>913.5465</b>  | <b>457.2769</b> | 896.5200         | 448.7636         | 895.5360         | 448.2716         | 7  |
| 15 | 1529.8078        | <b>765.4076</b> | 1512.7813        | 756.8943        | <b>1511.7973</b> | 756.4023         | K    | <b>825.5145</b>  | <b>413.7609</b> | 809.4880         | 405.2476         | 808.5039         | 404.7556         | 6  |
| 16 | 1713.9290        | <b>857.4682</b> | 1696.9025        | 848.9549        | 1695.9185        | 848.4629         | K    | <b>642.3933</b>  | <b>321.7003</b> | 625.3668         | 313.1870         | 624.3828         | 312.6950         | 5  |
| 17 | 1810.9818        | 905.9945        | 1793.9552        | 897.4813        | 1792.9712        | 896.9893         | P    | <b>458.2722</b>  | 229.6397        | 441.2456         | 221.1264         | 440.2616         | 220.6344         | 4  |
| 18 | 1910.0502        | <b>955.5287</b> | 1893.0237        | <b>947.0155</b> | 1892.0396        | 946.5235         | V    | <b>361.2194</b>  | 181.1133        | 344.1928         | 172.6001         | 343.2088         | 172.1081         | 3  |
| 19 | 1997.0822        | 999.0448        | 1980.0557        | 990.5315        | 1979.0717        | 990.0395         | S    | <b>262.1510</b>  | 131.5791        | 245.1244         | 123.0659         | <b>244.1404</b>  | 122.5738         | 2  |
| 20 |                  |                 |                  |                 |                  |                  | R    | 175.1190         | 88.0631         | 158.0924         | 79.5498          |                  |                  | 1  |

MS/MS Fragmentation of **KEKNIKR**Found in **NOQYQ7**, Heterogeneous nuclear ribonucleoprotein M (Fragment) OS=Homo sapiens GN=HNRNPM PE=4 SV=1

Match to Query 2841: 1100.681248 from(551.347900, 2+) intensity(40095.6563)

Title: File1359 Spectrum7767 scans: 8407

Data file J:\2013-9-14-A549-Prometh-Fr7-ZW.mgf

Click mouse within plot area to zoom in by factor of two about that point

Or,   to  Da Label all possible matches  Label matches used for scoring 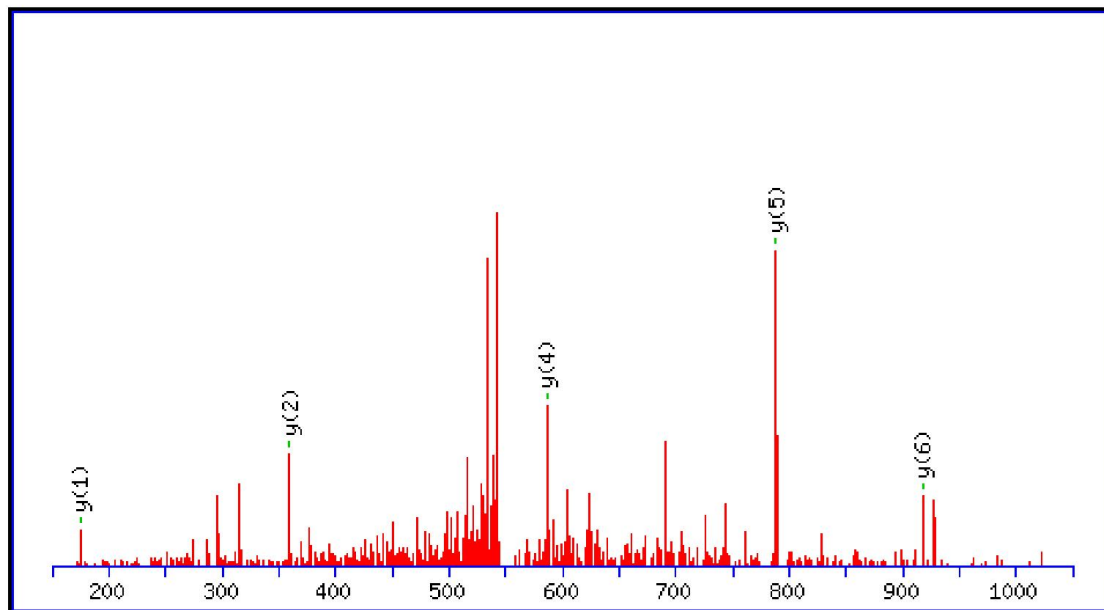**Monoisotopic mass of neutral peptide Mr(calc):** 1100.6826**Fixed modifications:** Carbamidomethyl (C) (apply to specified residues or termini only)**Variable modifications:****K1** : Propionyl (K)**K3** : Propionyl-(13CD3)Methyl (K)**K6** : Propionyl (K)**Ions Score:** 35 **Expect:** 0.072**Matches** : 5/60 fragment ions using 9 most intense peaks ([help](#))

| # | b        | b <sup>++</sup> | b*       | b <sup>+++</sup> | b <sup>0</sup> | b <sup>0++</sup> | Seq. | y               | y <sup>++</sup> | y <sup>+</sup> | y <sup>+++</sup> | y <sup>0</sup> | y <sup>0++</sup> | #        |
|---|----------|-----------------|----------|------------------|----------------|------------------|------|-----------------|-----------------|----------------|------------------|----------------|------------------|----------|
| 1 | 185.1285 | 93.0679         | 168.1019 | 84.5546          |                |                  | K    |                 |                 |                |                  |                |                  | 7        |
| 2 | 314.1710 | 157.5892        | 297.1445 | 149.0759         | 296.1605       | 148.5939         | E    | <b>917.5687</b> | 459.2880        | 900.5422       | 450.7747         |                | 899.5582         | 450.2827 |
| 3 | 516.3301 | 258.6687        | 499.3035 | 250.1554         | 498.3195       | 249.6634         | K    | <b>788.5261</b> | 394.7667        | 771.4996       | 386.2534         |                |                  | 5        |
| 4 | 630.3730 | 315.6901        | 613.3464 | 307.1769         | 612.3624       | 306.6848         | N    | <b>586.3671</b> | 293.6872        | 569.3406       | 285.1739         |                |                  | 4        |
| 5 | 743.4571 | 372.2322        | 726.4305 | 363.7189         | 725.4465       | 363.2269         | I    | 472.3242        | 236.6657        | 455.2976       | 228.1525         |                |                  | 3        |
| 6 | 927.5782 | 464.2928        | 910.5517 | 455.7795         | 909.5677       | 455.2875         | K    | <b>359.2401</b> | 180.1237        | 342.2136       | 171.6104         |                |                  | 2        |
| 7 |          |                 |          |                  |                |                  | R    | <b>175.1190</b> | 88.0631         | 158.0924       | 79.5498          |                |                  | 1        |

MS/MS Fragmentation of **FPVTDAVNKGLVDKINVDR**  
Found in **Q15149**, Plectin OS=Homo sapiens GN=PLEC PE=1 SV=3

Match to Query 14835: 2250.248082 from(751.089970, 3+) intensity(81341.5703)  
Title: File1359 Spectrum19464 scans: 20597  
Data file J:\2013-9-14-A549-Prometh-Fr7-ZW.mgf

Click mouse within plot area to zoom in by factor of two about that point  
Or,   to  Da   
Label all possible matches  Label matches used for scoring

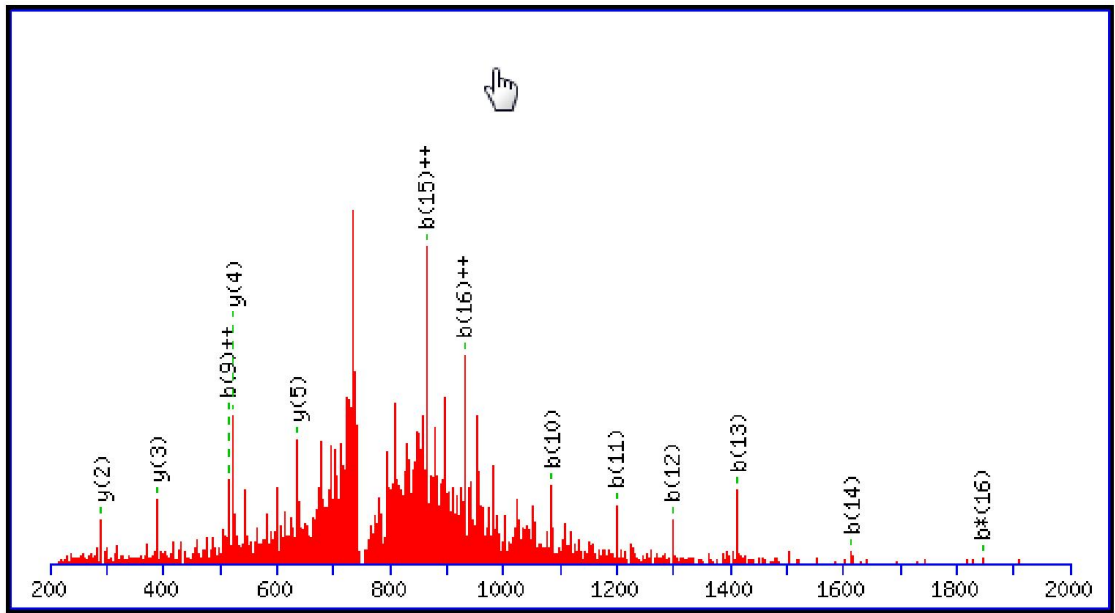

**Monoisotopic mass of neutral peptide Mr(calc):** 2250.2475  
**Fixed modifications:** Carbamidomethyl (C) (apply to specified residues of  
**Variable modifications:**  
**K9** : Propionyl (K)  
**K14** : Propionyl-(13CD3)Methyl (K)  
**M16** : Label:13C(1)2H(3) (M)  
**Ions Score:** 33 **Expect:** 0.27  
**Matches** : 13/194 fragment ions using 17 most intense peaks ([help](#))

| #  | b         | b <sup>++</sup> | b*        | b <sup>++</sup> * | b <sup>0</sup> | b <sup>0++</sup> | Seq. | y         | y <sup>++</sup> | y*        | y <sup>++</sup> * | y <sup>0</sup> | y <sup>0++</sup> | #  |
|----|-----------|-----------------|-----------|-------------------|----------------|------------------|------|-----------|-----------------|-----------|-------------------|----------------|------------------|----|
| 1  | 148.0757  | 74.5415         |           |                   |                |                  | F    |           |                 |           |                   |                |                  | 19 |
| 2  | 245.1285  | 123.0679        |           |                   |                |                  | P    | 2104.1864 | 1052.5968       | 2087.1598 | 1044.0836         | 2086.1758      | 1043.5915        | 18 |
| 3  | 344.1969  | 172.6021        |           |                   |                |                  | V    | 2007.1336 | 1004.0704       | 1990.1071 | 995.5572          | 1989.1230      | 995.0652         | 17 |
| 4  | 445.2445  | 223.1259        |           |                   | 427.2340       | 214.1206         | T    | 1908.0652 | 954.5362        | 1891.0386 | 946.0230          | 1890.0546      | 945.5310         | 16 |
| 5  | 560.2715  | 280.6394        |           |                   | 542.2609       | 271.6341         | D    | 1807.0175 | 904.0124        | 1789.9910 | 895.4991          | 1789.0070      | 895.0071         | 15 |
| 6  | 631.3086  | 316.1579        |           |                   | 613.2980       | 307.1527         | A    | 1691.9906 | 846.4989        | 1674.9640 | 837.9857          | 1673.9800      | 837.4936         | 14 |
| 7  | 730.3770  | 365.6921        |           |                   | 712.3665       | 356.6869         | V    | 1620.9835 | 810.9804        | 1603.9259 | 802.4671          | 1602.9429      | 801.9751         | 13 |
| 8  | 844.4199  | 422.7136        | 827.3934  | 414.2003          | 826.4094       | 413.7083         | N    | 1521.8850 | 761.4462        | 1504.8585 | 752.9329          | 1503.8745      | 752.4409         | 12 |
| 9  | 1028.5411 | 514.7742        | 1011.5148 | 506.2609          | 1010.5306      | 505.7689         | K    | 1407.8421 | 704.4247        | 1390.8156 | 695.9114          | 1389.8316      | 695.4194         | 11 |
| 10 | 1085.5626 | 543.2849        | 1068.5360 | 534.7717          | 1067.5520      | 534.2796         | G    | 1223.7209 | 612.3641        | 1206.6944 | 603.8508          | 1205.7104      | 603.3582         | 10 |
| 11 | 1198.6467 | 599.8270        | 1181.6201 | 591.3137          | 1180.6361      | 590.8217         | L    | 1166.6995 | 583.8534        | 1149.6729 | 575.3401          | 1148.6889      | 574.8481         | 9  |
| 12 | 1297.7151 | 649.3612        | 1280.6885 | 640.8479          | 1279.7045      | 640.3559         | V    | 1053.6154 | 527.3113        | 1036.5889 | 518.7981          | 1035.6048      | 518.3061         | 8  |
| 13 | 1412.7420 | 706.8746        | 1395.7155 | 698.3614          | 1394.7314      | 697.8694         | D    | 954.5470  | 477.7771        | 937.5205  | 469.2639          | 936.5364       | 468.7719         | 7  |
| 14 | 1614.9010 | 807.9541        | 1597.8745 | 799.4409          | 1596.8905      | 798.9489         | K    | 839.5201  | 420.2637        | 822.4935  | 411.7504          | 821.5095       | 411.2584         | 6  |
| 15 | 1727.9851 | 864.4962        | 1710.9585 | 855.9829          | 1709.9745      | 855.4909         | I    | 637.3610  | 319.1842        | 620.3345  | 310.6709          | 619.3505       | 310.1789         | 5  |
| 16 | 1863.0478 | 932.0275        | 1846.0212 | 923.5142          | 1845.0372      | 923.0222         | L    | 524.2770  | 262.6421        | 507.2504  | 254.1289          | 506.2664       | 253.6368         | 4  |
| 17 | 1962.1162 | 981.5617        | 1945.0896 | 973.0484          | 1944.1056      | 972.5564         | V    | 389.2143  | 195.1108        | 372.1878  | 186.5975          | 371.2037       | 186.1055         | 3  |
| 18 | 2077.1431 | 1039.0752       | 2060.1166 | 1030.5619         | 2059.1325      | 1030.0699        | D    | 290.1459  | 145.5766        | 273.1193  | 137.0633          | 272.1353       | 136.5713         | 2  |
| 19 |           |                 |           |                   |                |                  | R    | 175.1190  | 88.0631         | 158.0924  | 79.5498           |                |                  |    |



Found in **P35251**, Replication factor C subunit 1 OS=Homo sapiens GN=RFC1 PE=1 SV=4

Match to Query 802: 808.538488 from(405.276520,2+) intensity(49100.9648)

Title: File1368 Spectrum6792 scans: 7408

Data file J:\2013-9-14-A549-Prometh-Fr6-ZW.mgf

Click mouse within plot area to zoom in by factor of two about that point

Or,   to  Da Label all possible matches  Label matches used for scoring 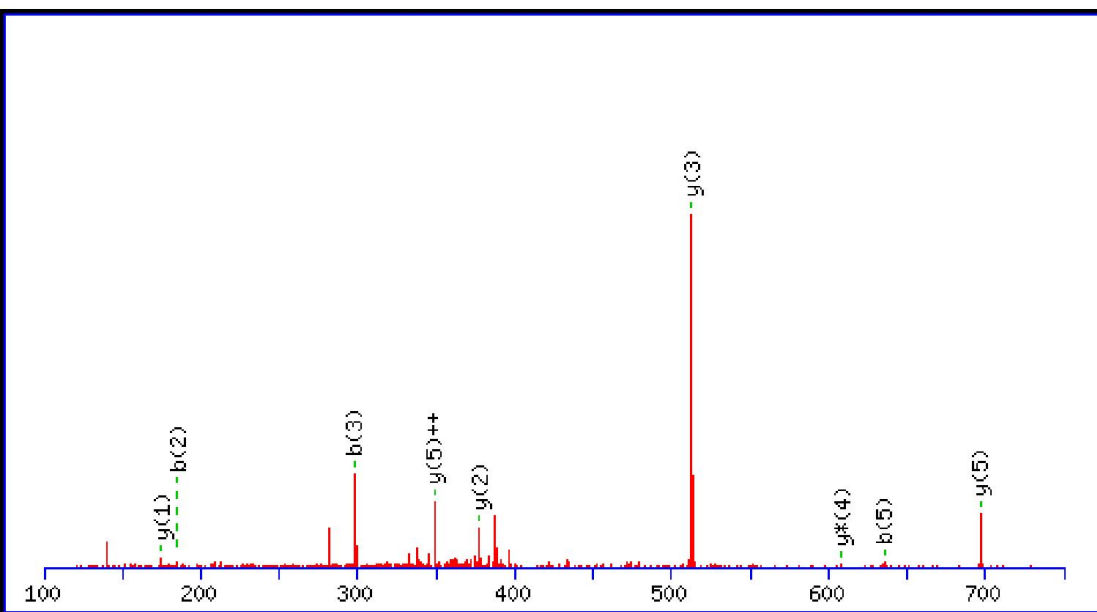**Monoisotopic mass of neutral peptide Mr(calc):** 808.5386**Fixed modifications:** Carbamidomethyl (C) (apply to specified residues or termini only)**Variable modifications:****M4** : Label:13C(1)2H(3) (M)**K5** : Propionyl-(13CD3)Methyl (K)**Ions Score:** 22 **Expect:** 0.59**Matches** : 9/32 fragment ions using 19 most intense peaks ([help](#))

| # | b               | b <sup>++</sup> | b <sup>*</sup> | b <sup>++*</sup> | Seq. | y               | y <sup>++</sup> | y <sup>*</sup>  | y <sup>++*</sup> | # |
|---|-----------------|-----------------|----------------|------------------|------|-----------------|-----------------|-----------------|------------------|---|
| 1 | 114.0913        | 57.5493         |                |                  | L    |                 |                 |                 |                  | 6 |
| 2 | <b>185.1285</b> | 98.0679         |                |                  | A    | <b>696.4618</b> | <b>348.7345</b> | 679.4353        | 340.2213         | 5 |
| 3 | <b>298.2125</b> | 149.6099        |                |                  | I    | 625.4247        | 313.2160        | <b>608.3981</b> | 304.7027         | 4 |
| 4 | 433.2752        | 217.1412        |                |                  | N    | <b>512.3406</b> | 256.6740        | 495.3141        | 248.1607         | 3 |
| 5 | <b>635.4342</b> | 318.2207        | 618.4077       | 309.7075         | K    | <b>377.2780</b> | 189.1426        | 360.2514        | 180.6293         | 2 |
| 6 |                 |                 |                |                  | R    | <b>175.1190</b> | 88.0631         | 158.0924        | 79.5498          | 1 |

MS/MS Fragmentation of **SKTKEAR**

Found in **J3KTE4**, Ribosomal protein L19 OS=Homo sapiens GN=RPL19 PE=3 SV=1

Match to Query 2313: 948.550568 from(475.282560,2+) intensity(21401.1680)

Title: File1368 Spectrum3775 scans: 4214

Data file J:\2013-9-14-A549-Prometh-Fr6-ZW.mgf

Click mouse within plot area to zoom in by factor of two about that point

Or,   to  Da

Label all possible matches  Label matches used for scoring

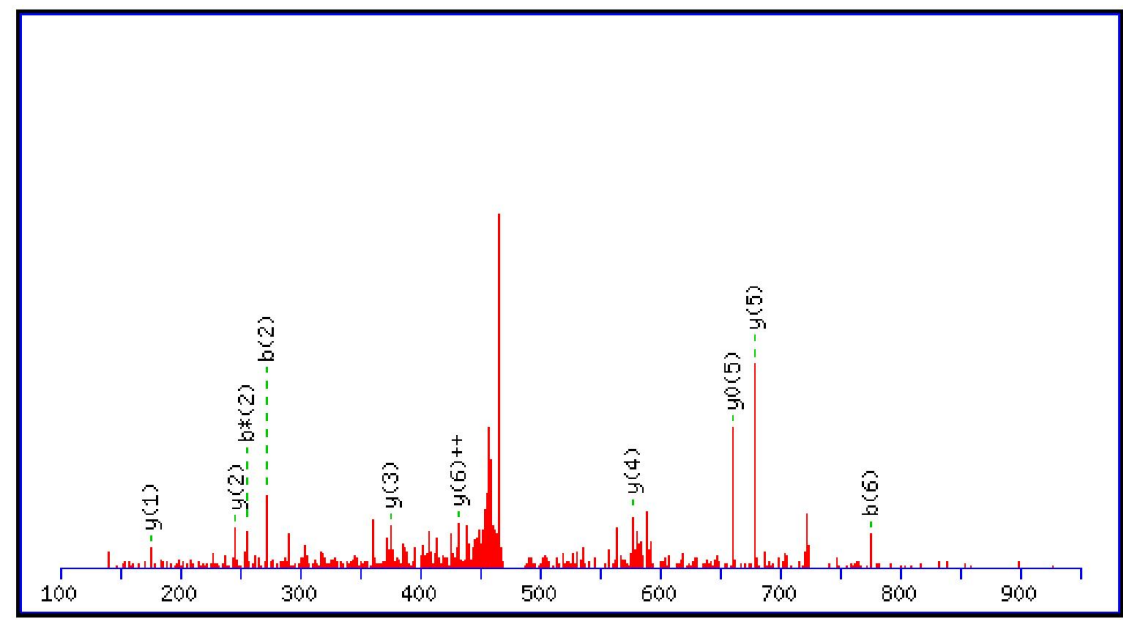

**Monoisotopic mass of neutral peptide Mr(calc):** 948.5513

**Fixed modifications:** Carbamidomethyl (C) (apply to specified residues or termini only)

**Variable modifications:**

**K2** : Propionyl (K)

**K4** : Propionyl-(13CD3)Methyl (K)

**Ions Score:** 27 **Expect:** 0.69

**Matches :** 10/66 fragment ions using 24 most intense peak:

| # | b               | b <sup>++</sup> | b*              | b <sup>+++</sup> | b <sup>0</sup> | b <sup>0++</sup> | Seq. | y               | y <sup>++</sup> | y*       | y <sup>+++</sup> | y <sup>0</sup>  | y <sup>0++</sup> | # |
|---|-----------------|-----------------|-----------------|------------------|----------------|------------------|------|-----------------|-----------------|----------|------------------|-----------------|------------------|---|
| 1 | 88.0393         | 44.5233         |                 |                  | 70.0287        | 35.5180          | S    |                 |                 |          |                  |                 |                  | 7 |
| 2 | <b>272.1605</b> | 136.5839        | <b>255.1339</b> | 128.0706         | 254.1499       | 127.5786         | K    | 862.5265        | <b>431.7669</b> | 845.5000 | 423.2538         | 844.5160        | 422.7616         | 6 |
| 3 | 373.2082        | 187.1077        | 356.1816        | 178.5944         | 355.1976       | 178.1024         | T    | <b>678.4054</b> | 339.7063        | 661.3788 | 331.1930         | <b>660.3948</b> | 330.7010         | 5 |
| 4 | 575.3672        | 288.1872        | 558.3406        | 279.6740         | 557.3566       | 279.1819         | K    | <b>577.3577</b> | 289.1825        | 560.3311 | 280.6692         | 559.3471        | 280.1772         | 4 |
| 5 | 704.4098        | 352.7085        | 687.3832        | 344.1952         | 686.3992       | 343.7032         | E    | <b>375.1987</b> | 188.1030        | 358.1721 | 179.5897         | 357.1881        | 179.0977         | 3 |
| 6 | <b>775.4469</b> | 388.2271        | 758.4203        | 379.7138         | 757.4363       | 379.2218         | A    | <b>246.1561</b> | 123.5817        | 229.1295 | 115.0684         |                 |                  | 2 |
| 7 |                 |                 |                 |                  |                |                  | R    | <b>175.1190</b> | 88.0631         | 158.0924 | 79.5498          |                 |                  | 1 |

MS/MS Fragmentation of **FQATSKKGISR**Found in **Q96ST2**, Protein IWS1 homolog OS=Homo sapiens GN=IWS1 PE=1 SV=2

Match to Query 6627: 1351.773168 from(676.893860,2+) intensity(22756.0352)

Title: File1368 Spectrum8828 scans: 9530

Data file J:\2013-9-14-A549-Prometh-Fr6-ZW.mgf

Click mouse within plot area to zoom in by factor of two about that point

Or,   to  Da Label all possible matches  Label matches used for scoring 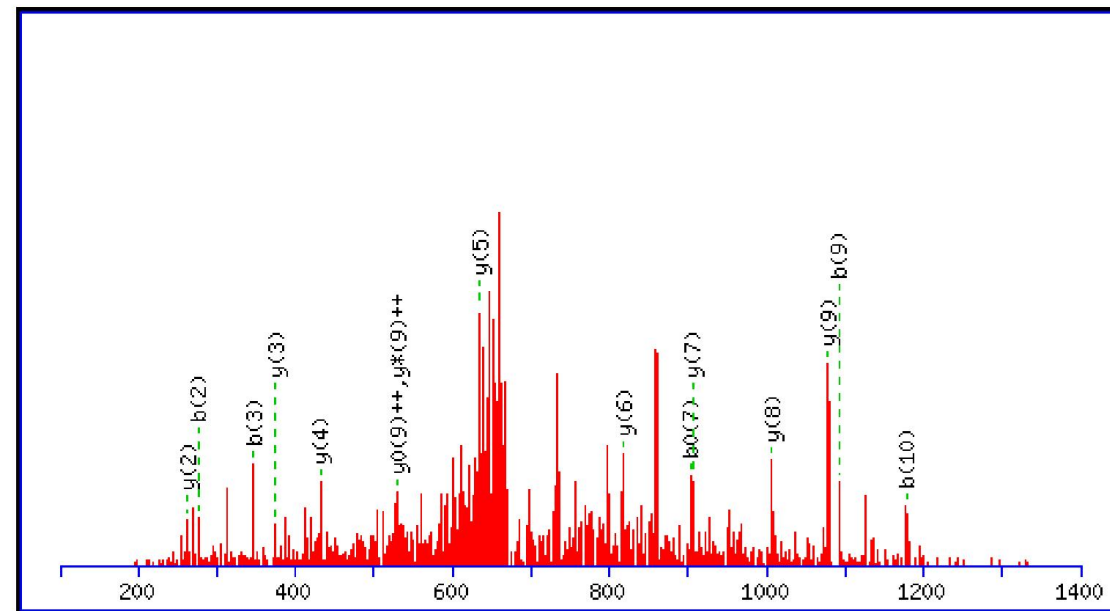**Monoisotopic mass of neutral peptide Mr(calc):** 1351.7732**Fixed modifications:** Carbamidomethyl (C) (apply to specified residues or termini only)**Variable modifications:****K6** : Propionyl (K)**K7** : Propionyl-(13CD3)Methyl (K)**Ions Score:** 29 **Expect:** 0.48**Matches** : 15/110 fragment ions using 48 most intense peaks [\(help\)](#)

| #  | b                | b <sup>++</sup> | b <sup>*</sup> | b <sup>++</sup> * | b <sup>0</sup> | b <sup>0++</sup> | Seq. | y                | y <sup>++</sup> | y <sup>*</sup> | y <sup>++</sup> * | y <sup>0</sup> | y <sup>0++</sup> | #  |
|----|------------------|-----------------|----------------|-------------------|----------------|------------------|------|------------------|-----------------|----------------|-------------------|----------------|------------------|----|
| 1  | 148.0757         | 74.5415         |                |                   |                |                  | F    |                  |                 |                |                   |                |                  | 11 |
| 2  | <b>276.1343</b>  | 138.5708        | 259.1077       | 130.0575          |                |                  | Q    | 1205.7121        | 603.3597        | 1188.6855      | 594.8464          | 1187.7015      | 594.3544         | 10 |
| 3  | <b>347.1714</b>  | 174.0893        | 330.1448       | 165.5761          |                |                  | A    | <b>1077.6535</b> | 539.3304        | 1060.6270      | 530.8171          | 1059.6430      | 530.3251         | 9  |
| 4  | 448.2191         | 224.6132        | 431.1925       | 216.0998          | 430.2035       | 215.6079         | T    | <b>1006.6164</b> | 503.8118        | 989.5899       | 495.2986          | 988.6058       | 494.8066         | 8  |
| 5  | 535.2511         | 268.1292        | 518.2245       | 259.6159          | 517.2405       | 259.1239         | S    | <b>905.5687</b>  | 453.2880        | 888.5422       | 444.7747          | 887.5582       | 444.2827         | 7  |
| 6  | 719.3723         | 360.1898        | 702.3457       | 351.8785          | 701.3617       | 351.1845         | K    | <b>818.5367</b>  | 409.7720        | 801.5102       | 401.2587          | 800.5261       | 400.7667         | 6  |
| 7  | 921.5313         | 461.2693        | 904.5047       | 452.7560          | 903.5207       | 452.2640         | K    | <b>634.4155</b>  | 317.7114        | 617.3890       | 309.1981          | 616.4050       | 308.7061         | 5  |
| 8  | 978.5527         | 489.7800        | 961.5262       | 481.2667          | 960.5422       | 480.7747         | G    | <b>432.2565</b>  | 216.6319        | 415.2300       | 208.1186          | 414.2459       | 207.6266         | 4  |
| 9  | <b>1091.6368</b> | 546.3220        | 1074.6103      | 537.8088          | 1073.6262      | 537.3168         | I    | <b>375.2350</b>  | 188.1212        | 358.2085       | 179.6079          | 357.2245       | 179.1159         | 3  |
| 10 | <b>1178.6688</b> | 589.8381        | 1161.6423      | 581.3248          | 1160.6583      | 580.8328         | S    | <b>262.1510</b>  | 131.5791        | 245.1244       | 123.0659          | 244.1404       | 122.5738         | 2  |
| 11 |                  |                 |                |                   |                |                  | R    | 175.1190         | 88.0631         | 158.0924       | 79.5498           |                |                  | 1  |

Found in **HOYJH7**, Thymopentin (Fragment) OS=Homo sapiens GN=TMPO PE=2 SV=1

Match to Query 5983: 1270.788668 from(636.401610, 2+) intensity(33045.8945)

Title: File1368 Spectrum9518 scans: 10248

Data file J:\2013-9-14-A549-Prometh-Fr6-ZW.mgf

Click mouse within plot area to zoom in by factor of two about that point

Or,   to  Da

Label all possible matches  Label matches used for scoring

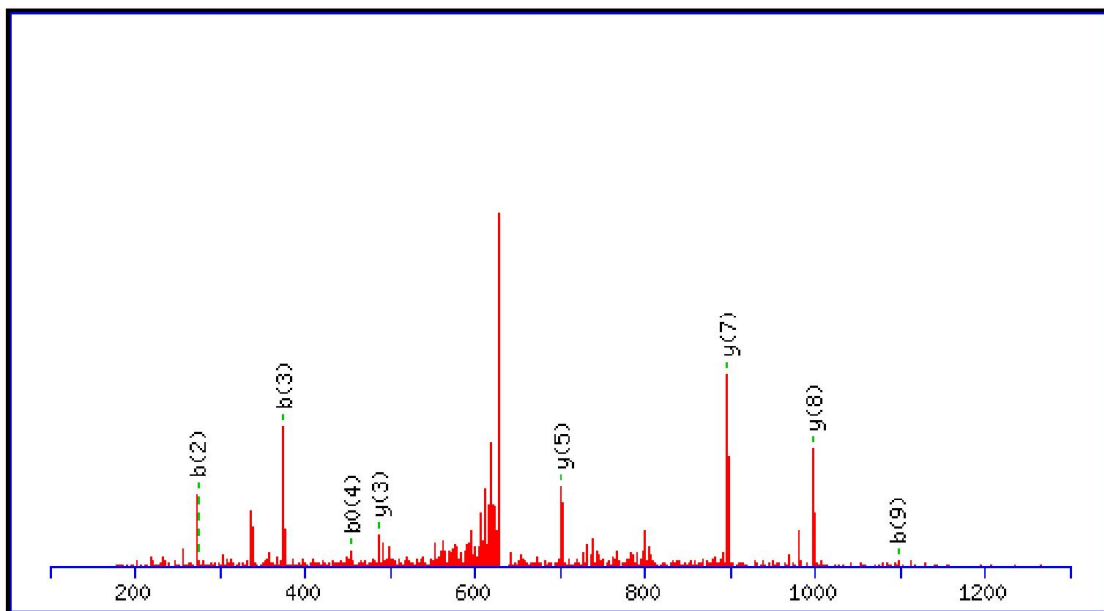

**Monoisotopic mass of neutral peptide Mr(calc):** 1270.7881

**Fixed modifications:** Carbamidomethyl (C) (apply to specified residues or termini only)

**Variable modifications:**

**K2** : Propionyl-(13CD3)Methyl (K)

**K8** : Propionyl (K)

**Ions Score:** 30 **Expect:** 0.18

**Matches** : 8/94 fragment ions using 11 most intense peaks ([help](#))

| #  | b                | b <sup>++</sup> | b <sup>+</sup> | b <sup>0</sup> | b <sup>0++</sup> | Seq.     | y         | y <sup>++</sup> | y <sup>+</sup> | y <sup>0++</sup> | y <sup>0</sup> | y <sup>0+</sup> | #        |   |
|----|------------------|-----------------|----------------|----------------|------------------|----------|-----------|-----------------|----------------|------------------|----------------|-----------------|----------|---|
| 1  | 72.0444          | 36.5258         |                |                |                  | A        |           |                 |                |                  |                |                 | 10       |   |
| 2  | <b>274.2034</b>  | 137.6053        | 257.1769       | 129.0921       |                  | K        | 1200.7583 | 600.8828        | 1183.7318      | 592.3695         | 1182.7478      | 591.8775        | 9        |   |
| 3  | <b>375.2511</b>  | 188.1292        | 358.2245       | 179.6159       | 357.2405         | 179.1239 | T         | <b>998.5993</b> | 499.8033       | 981.5728         | 491.2900       | 980.5887        | 490.7980 | 8 |
| 4  | 472.3038         | 236.6556        | 455.2773       | 228.1423       | <b>454.2933</b>  | 227.6503 | P         | <b>897.5516</b> | 449.2795       | 880.5251         | 440.7662       | 879.5411        | 440.2742 | 7 |
| 5  | 571.3723         | 286.1898        | 554.3457       | 277.8765       | 553.3617         | 277.1845 | V         | 800.4989        | 400.7531       | 783.4723         | 392.2398       | 782.4883        | 391.7478 | 6 |
| 6  | 672.4199         | 336.7136        | 655.3934       | 328.2003       | 654.4094         | 327.7083 | T         | <b>701.4305</b> | 351.2189       | 684.4039         | 342.7056       | 683.4199        | 342.2136 | 5 |
| 7  | 785.5040         | 393.2556        | 768.4775       | 384.7424       | 767.4934         | 384.2504 | L         | 600.3828        | 300.6950       | 583.3562         | 292.1817       |                 |          | 4 |
| 8  | 969.6252         | 485.3162        | 952.5986       | 476.8030       | 951.6146         | 476.3109 | K         | <b>487.2987</b> | 244.1530       | 470.2722         | 235.6397       |                 |          | 3 |
| 9  | <b>1097.6838</b> | 549.3455        | 1080.6572      | 540.8322       | 1079.6732        | 540.3402 | Q         | 303.1775        | 152.0924       | 286.1510         | 143.5791       |                 |          | 2 |
| 10 |                  |                 |                |                |                  | R        | 175.1190  | 88.0631         | 158.0924       | 79.5498          |                |                 | 1        |   |

MS/MS Fragmentation of **KSSDNPKR**

Found in **Q96L73**, Histone-lysine N-methyltransferase, H3 lysine-36 and H4 lysine-20 specific OS=Homo sapiens GN=NSD1 PE=1 SV=1

Match to Query 3622: 1060.578108 from(531.296330, 2+) intensity(6147.5298)

285

Title: File1368 Spectrum3200 scans: 3592

Data file J:\2013-9-14-A549-Prometh-Fr6-ZW.mgf

Click mouse within plot area to zoom in by factor of two about that point

Or,   to  Da

Label all possible matches  Label matches used for scoring

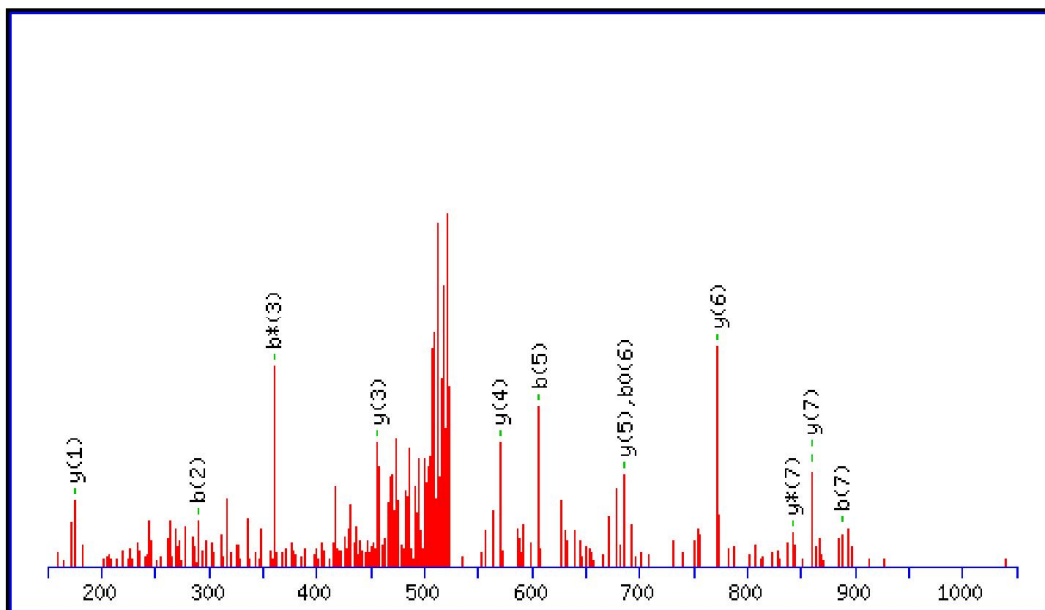

**Monoisotopic mass of neutral peptide Mr(calc):** 1060.5785

**Fixed modifications:** Carbamidomethyl (C) (apply to specified residues or termini only)

**Variable modifications:**

**K1** : Propionyl-(13CD3)Methyl (K)

**K7** : Propionyl (K)

**Ions Score:** 31 **Expect:** 0.26

**Matches :** 12/74 fragment ions using 25 most intense peaks ([help](#))

| # | b               | b <sup>++</sup> | b <sup>+</sup>  | b <sup>++</sup> | b <sup>0</sup>  | b <sup>0++</sup> | Seq. | y               | y <sup>++</sup> | y <sup>+</sup>  | y <sup>++</sup> | y <sup>0</sup> | y <sup>0++</sup> | # |
|---|-----------------|-----------------|-----------------|-----------------|-----------------|------------------|------|-----------------|-----------------|-----------------|-----------------|----------------|------------------|---|
| 1 | 203.1663        | 102.0868        | 186.1397        | 93.5735         |                 |                  | K    |                 |                 |                 |                 |                |                  | 8 |
| 2 | <b>290.1983</b> | 145.6028        | 273.1718        | 137.0895        | 272.1878        | 136.5975         | S    | <b>859.4268</b> | 430.2170        | <b>842.4003</b> | 421.7038        | 841.4163       | 421.2118         | 7 |
| 3 | 377.2303        | 189.1188        | <b>360.2038</b> | 180.6055        | 359.2198        | 180.1135         | S    | <b>772.3948</b> | 386.7010        | 755.3682        | 378.1878        | 754.3942       | 377.6958         | 6 |
| 4 | 492.2573        | 246.6323        | 475.2307        | 238.1190        | 474.2467        | 237.6270         | D    | <b>685.3628</b> | 343.1850        | 668.3362        | 334.6717        | 667.3522       | 334.1797         | 5 |
| 5 | <b>606.3002</b> | 303.6537        | 589.2737        | 295.1405        | 588.2897        | 294.6485         | N    | <b>570.3358</b> | 285.6715        | 553.3093        | 277.1583        |                |                  | 4 |
| 6 | 703.3530        | 352.1801        | 686.3264        | 343.6669        | <b>685.3424</b> | 343.1748         | P    | <b>456.2929</b> | 228.6501        | 439.2663        | 220.1368        |                |                  | 3 |
| 7 | <b>887.4742</b> | 444.2407        | 870.4476        | 435.7274        | 869.4636        | 435.2354         | K    | 359.2401        | 180.1237        | 342.2136        | 171.6104        |                |                  | 2 |
| 8 |                 |                 |                 |                 |                 |                  | R    | <b>175.1190</b> | 88.0631         | 158.0924        | 79.5498         |                |                  | 1 |

Found in **Q5UIP0**, Telomere-associated protein RIF1 OS=Homo sapiens GN=RIF1 PE=1 SV=2

Match to Query 6142: 1288.700648 from(645.357600, 2+) intensity(19868.2969)

Title: File1368 Spectrum3927 scans: 4376

Data file J:\2013-9-14-A549-Prometh-Fr6-ZW.mgf

Click mouse within plot area to zoom in by factor of two about that point

Or,   to  Da Label all possible matches  Label matches used for scoring 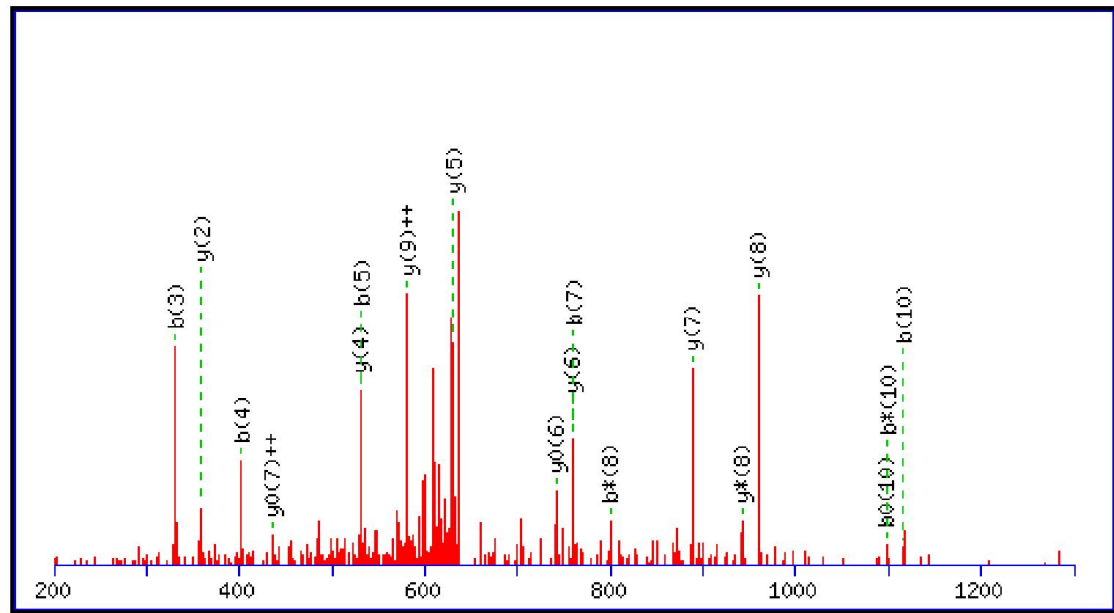**Monoisotopic mass of neutral peptide Mr(calc): 1288.7008****Fixed modifications:** Carbamidomethyl (C) (apply to specified residues or termini only)**Variable modifications:****K3** : Propionyl-(13CD3)Methyl (K)**K10** : Propionyl (K)**Ions Score: 34 Expect: 0.19****Matches : 18/100 fragment ions using 33 most intense peaks** ([help](#))

| #  | b                | b <sup>++</sup> | b <sup>+</sup>   | b <sup>++</sup> | b <sup>0</sup>   | b <sup>0++</sup> | Seq. | y               | y <sup>++</sup> | y <sup>+</sup>  | y <sup>++</sup> | y <sup>0</sup>  | y <sup>0++</sup> | #  |
|----|------------------|-----------------|------------------|-----------------|------------------|------------------|------|-----------------|-----------------|-----------------|-----------------|-----------------|------------------|----|
| 1  | 72.0444          | 36.5259         |                  |                 |                  |                  | A    |                 |                 |                 |                 |                 |                  | 11 |
| 2  | 129.0659         | 65.0366         |                  |                 |                  |                  | C    | 1218.6710       | 609.8391        | 1201.6444       | 601.3258        | 1200.6604       | 600.8338         | 10 |
| 3  | <b>331.2249</b>  | 166.1161        | 314.1983         | 157.6028        |                  |                  | K    | 1161.6495       | <b>581.3284</b> | 1144.6229       | 572.8151        | 1143.6389       | 572.3231         | 9  |
| 4  | <b>402.2620</b>  | 201.6346        | 385.2354         | 193.1214        |                  |                  | A    | <b>959.4905</b> | 480.2489        | <b>942.4639</b> | 471.7356        | 941.4799        | 471.2436         | 8  |
| 5  | <b>531.3046</b>  | 266.1559        | 514.2780         | 257.6427        | 513.2940         | 257.1506         | K    | <b>888.4534</b> | 444.7303        | 871.4268        | 436.2170        | 870.4428        | <b>435.7250</b>  | 7  |
| 6  | 659.3632         | 330.1852        | 642.3366         | 321.6719        | 641.3526         | 321.1799         | Q    | <b>759.4106</b> | 380.2090        | 742.3842        | 371.6958        | <b>741.4002</b> | 371.2037         | 6  |
| 7  | <b>760.4108</b>  | 380.7091        | 743.3843         | 372.1958        | 742.4003         | 371.7038         | T    | <b>631.3522</b> | 316.1797        | 614.3257        | 307.6665        | 613.3416        | 307.1745         | 5  |
| 8  | 817.4323         | 409.2198        | <b>800.4057</b>  | 400.7065        | 799.4217         | 400.2145         | G    | <b>530.3045</b> | 265.6559        | 513.2780        | 257.1426        |                 |                  | 4  |
| 9  | 931.4752         | 466.2412        | 914.4487         | 457.7280        | 913.4647         | 457.2360         | N    | 473.2831        | 237.1452        | 456.2565        | 228.6319        |                 |                  | 3  |
| 10 | <b>1115.5967</b> | 558.3018        | <b>1098.5699</b> | 549.7886        | <b>1097.5858</b> | 549.2966         | K    | <b>359.2407</b> | 180.1237        | 342.2136        | 171.6104        |                 |                  | 2  |
| 11 |                  |                 |                  |                 |                  |                  | R    | 175.1190        | 88.0631         | 158.0924        | 79.5498         |                 |                  | 1  |

Match to Query 3865: 1077.567968 from(539.791260, 2+) intensity(67747.7891)

Title: File1368 Spectrum2886 scans: 3262

Data file J:\2013-9-14-A549-Prometh-Fr6-ZW.mgf

Click mouse within plot area to zoom in by factor of two about that point

Or,   to  Da Label all possible matches  Label matches used for scoring 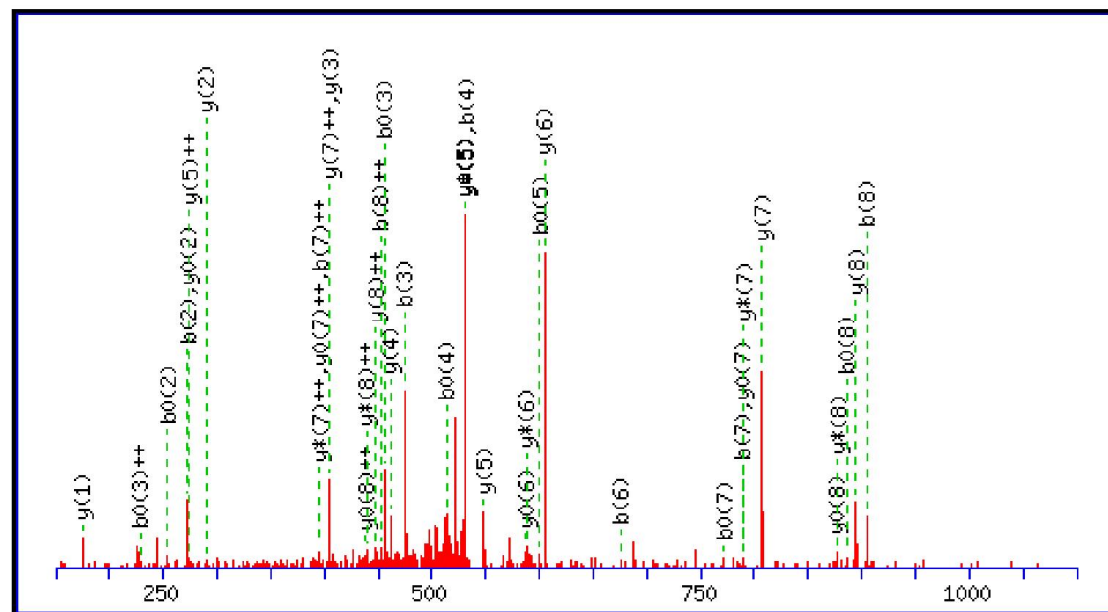Monoisotopic mass of neutral peptide  $M_r(\text{calc})$ : 1077.5687

Fixed modifications: Carbamidomethyl (C) (apply to specified residues or termini only)

Variable modifications:

K1 : Propionyl (K)

K3 : Propionyl-(13CD3)Methyl (K)

Ions Score: 41 Expect: 0.028

Matches : 39/92 fragment ions using 78 most intense peaks ([help](#))

| # | b               | b <sup>++</sup> | b <sup>+</sup> | b <sup>+++</sup> | b <sup>0</sup> | b <sup>0++</sup> | Seq. | y               | y <sup>++</sup> | y <sup>+</sup> | y <sup>+++</sup> | y <sup>0</sup> | y <sup>0++</sup> | # |
|---|-----------------|-----------------|----------------|------------------|----------------|------------------|------|-----------------|-----------------|----------------|------------------|----------------|------------------|---|
| 1 | 185.1285        | 93.0679         | 168.1019       | 84.5546          |                |                  | K    |                 |                 |                |                  |                |                  | 9 |
| 2 | <b>272.1605</b> | 136.5839        | 255.1339       | 128.0706         | 354.1499       | 127.5786         | S    | <b>894.4548</b> | 447.7310        | 877.4283       | 439.2178         | 876.4443       | 438.7258         | 8 |
| 3 | <b>474.3195</b> | 237.6634        | 467.2929       | 229.1501         | 456.3089       | 228.6581         | K    | <b>807.4228</b> | 404.2150        | 790.3982       | 395.7018         | 789.4122       | 395.2098         | 7 |
| 4 | <b>531.3410</b> | 266.1741        | 514.3144       | 257.6608         | 513.3304       | 257.1688         | G    | <b>605.2638</b> | 303.1355        | 588.2372       | 294.6233         | 587.2532       | 294.1302         | 6 |
| 5 | 618.3730        | 309.6901        | 601.3464       | 301.1769         | 600.3624       | 300.6848         | S    | <b>548.2423</b> | 274.6248        | 531.2158       | 266.1115         | 530.2317       | 265.6195         | 5 |
| 6 | <b>675.3945</b> | 338.2009        | 658.3679       | 329.6876         | 657.3839       | 329.1956         | G    | <b>461.2103</b> | 231.1088        | 444.1837       | 222.5955         | 443.1997       | 222.1035         | 4 |
| 7 | <b>789.4374</b> | 395.2223        | 772.4108       | 386.7091         | 771.4268       | 386.2170         | N    | <b>404.1888</b> | 202.5980        | 387.1623       | 194.0848         | 386.1783       | 193.5928         | 3 |
| 8 | <b>904.4643</b> | 452.7358        | 887.4378       | 444.2225         | 886.4538       | 443.7305         | D    | <b>290.1459</b> | 145.5766        | 273.1133       | 137.0633         | 272.1353       | 136.5713         | 2 |
| 9 |                 |                 |                |                  |                |                  | R    | <b>175.1190</b> | 88.0631         | 158.0924       | 79.5498          |                |                  | 1 |

MS/MS Fragmentation of **SKQAILAAQR**Found in **060869-2**, Isoform 2 of Endothelial differentiation-related factor 1 OS=Homo sapiens GN=EDF1

Match to Query 4896: 1158.697728 from(580.356140, 2+) intensity(51590.8477)

Title: File1368 Spectrum9029 scans: 9739

Data file J:\2013-9-14-A549-Prometh-Fr6-ZW.mgf

Click mouse within plot area to zoom in by factor of two about that point

Or,   to  Da Label all possible matches  Label matches used for scoring 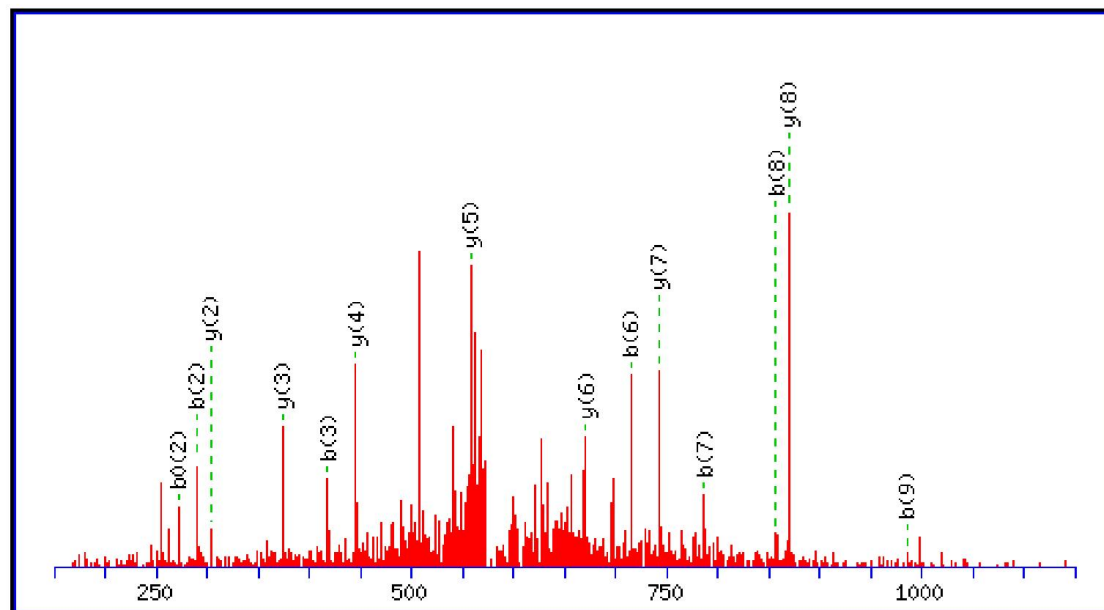**Monoisotopic mass of neutral peptide Mr(calc):** 1158.6993**Fixed modifications:** Carbamidomethyl (C) (apply to specified residues or termini only)**Variable modifications:****K2** : Propionyl-(13CD3)Methyl (K)**Ions Score:** 45 **Expect:** 0.0079**Matches** : 14/88 fragment ions using 30 most intense peaks ([help](#))

| #  | b                   | b <sup>++</sup> | b <sup>+</sup> | b <sup>+++</sup> | b <sup>0</sup>      | b <sup>0++</sup> | Seq. | y                   | y <sup>++</sup> | y <sup>+</sup> | y <sup>+++</sup> | #  |
|----|---------------------|-----------------|----------------|------------------|---------------------|------------------|------|---------------------|-----------------|----------------|------------------|----|
| 1  | 88.0393             | 44.5233         |                |                  | 70.0287             | 35.5180          | S    |                     |                 |                |                  | 10 |
| 2  | <del>290.1983</del> | 145.6028        | 273.1718       | 137.0895         | <del>272.1878</del> | 136.5975         | K    | 1072.6746           | 536.8409        | 1055.6480      | 528.3277         | 9  |
| 3  | <del>418.2569</del> | 209.6321        | 401.2303       | 201.1188         | 400.2463            | 200.6268         | Q    | <del>870.5156</del> | 435.7614        | 853.4890       | 427.2482         | 8  |
| 4  | 489.2940            | 245.1506        | 472.2675       | 236.6374         | 471.2834            | 236.1454         | A    | <del>742.4570</del> | 371.7321        | 725.4305       | 363.2189         | 7  |
| 5  | 602.3781            | 301.6927        | 585.3515       | 293.1794         | 584.3675            | 292.6874         | I    | <del>671.4199</del> | 336.2136        | 654.3933       | 327.7003         | 6  |
| 6  | <del>715.4621</del> | 358.2347        | 698.4356       | 349.7214         | 697.4516            | 349.2294         | L    | <del>558.3358</del> | 279.6715        | 541.3093       | 271.1583         | 5  |
| 7  | <del>786.4993</del> | 393.7533        | 769.4727       | 385.2400         | 768.4887            | 384.7480         | A    | <del>445.2518</del> | 223.1295        | 428.2252       | 214.6162         | 4  |
| 8  | <del>857.5364</del> | 429.2718        | 840.5098       | 420.7585         | 839.5258            | 420.2665         | A    | <del>374.2146</del> | 187.6110        | 367.1881       | 179.0977         | 3  |
| 9  | <del>985.5949</del> | 493.3011        | 968.5684       | 484.7878         | 967.5844            | 484.2958         | Q    | <del>303.1775</del> | 152.0924        | 286.1510       | 143.5791         | 2  |
| 10 |                     |                 |                |                  |                     |                  | R    | 175.1190            | 88.0631         | 158.0924       | 79.5498          | 1  |



MS/MS Fragmentation of **AKEAAEQDVEKKK**Found in **J3KS98**, 60S ribosomal protein L13 (Fragment) OS=Homo sapiens GN=RPL13 PE=4 SV=1

Match to Query 10247: 1714.928688 from(858.471620, 2+) intensity(75932.7734)

Title: File1368 Spectrum10291 scans: 11054

Data file J:\2013-9-14-A549-Prometh-Fr6-ZW.mgf

Click mouse within plot area to zoom in by factor of two about that point

Or,   to  Da Label all possible matches  Label matches used for scoring 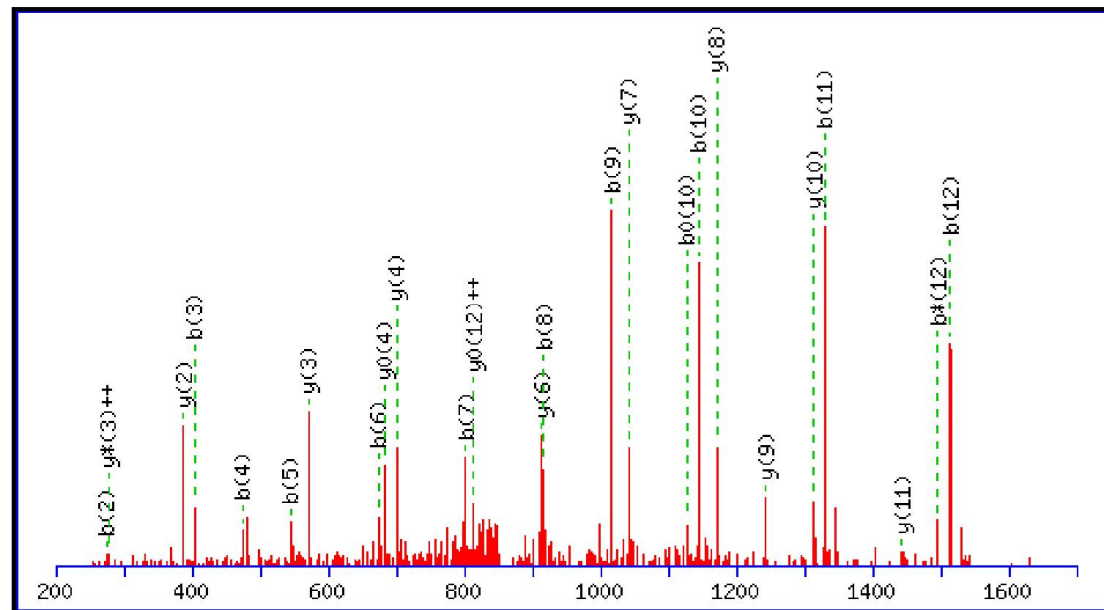**Monoisotopic mass of neutral peptide Mr(calc):** 1714.9261**Fixed modifications:** Carbamidomethyl (C) (apply to specified residues or termini only)**Variable modifications:****K2** : Propionyl-(13CD3)Methyl (K)**K11** : Propionyl (K)**K12** : Propionyl (K)**K13** : Propionyl (K)**Ions Score:** 76 **Expect:** 1.3e-005**Matches** : 25/132 fragment ions using 41 most intense peaks ([help](#))

| #  | b                | b <sup>++</sup> | b <sup>+</sup>   | b <sup>++</sup> | b <sup>0</sup>   | b <sup>0++</sup> | Seq. | y                | y <sup>++</sup> | y <sup>+</sup> | y <sup>++</sup> | y <sup>0</sup>  | y <sup>0++</sup> | #  |
|----|------------------|-----------------|------------------|-----------------|------------------|------------------|------|------------------|-----------------|----------------|-----------------|-----------------|------------------|----|
| 1  | 72.0444          | 36.5258         |                  |                 |                  |                  | A    |                  |                 |                |                 |                 |                  | 13 |
| 2  | <b>274.2034</b>  | 137.6053        | 257.1769         | 129.0921        |                  |                  | K    | 1644.8963        | 822.9518        | 1627.9698      | 814.4385        | 1626.8858       | <b>813.9465</b>  | 12 |
| 3  | <b>403.2460</b>  | 202.1266        | 386.2194         | 193.6134        | 385.2354         | 193.1214         | E    | <b>1442.7373</b> | 721.8723        | 1425.7108      | 713.3590        | 1424.7268       | 712.8670         | 11 |
| 4  | <b>474.2837</b>  | 237.6452        | 457.2566         | 229.1319        | 456.2725         | 228.6399         | A    | <b>1313.6947</b> | 657.3510        | 1296.6682      | 648.8377        | 1295.6842       | 648.3457         | 10 |
| 5  | <b>545.3202</b>  | 273.1638        | 528.2937         | 264.6505        | 527.3097         | 264.1585         | A    | <b>1242.6576</b> | 621.8324        | 1225.6311      | 613.3192        | 1224.6470       | 612.8272         | 9  |
| 6  | <b>674.3628</b>  | 337.6850        | 657.3363         | 329.1718        | 656.3523         | 328.6798         | E    | <b>1171.6205</b> | 586.3139        | 1154.5939      | 577.8006        | 1153.6099       | 577.3086         | 8  |
| 7  | <b>802.4214</b>  | 401.7143        | 785.3948         | 393.2011        | 784.4108         | 392.7091         | Q    | <b>1042.5779</b> | 521.7926        | 1025.5514      | 513.2793        | 1024.5673       | 512.7873         | 7  |
| 8  | <b>917.4483</b>  | 459.2278        | 900.4218         | 450.7145        | 899.4378         | 450.2225         | D    | <b>914.5193</b>  | 457.7633        | 897.4928       | 449.2500        | 896.5088        | 448.7580         | 6  |
| 9  | <b>1016.5168</b> | 508.7620        | 999.4902         | 500.2487        | 998.5062         | 499.7567         | V    | 799.4924         | 400.2498        | 782.4658       | 391.7366        | 781.4818        | 391.2445         | 5  |
| 10 | <b>1145.5593</b> | 573.2833        | 1128.5328        | 564.7700        | <b>1127.5489</b> | 564.2780         | E    | <b>700.4240</b>  | 350.7156        | 683.3974       | 342.2023        | <b>682.4134</b> | 341.7103         | 4  |
| 11 | <b>1329.6005</b> | 665.3439        | 1312.6540        | 656.8306        | 1311.6700        | 656.3386         | K    | <b>571.3814</b>  | 286.1943        | 554.3648       | <b>277.6811</b> |                 |                  | 3  |
| 12 | <b>1513.8017</b> | 757.4045        | <b>1496.7752</b> | 748.8912        | 1495.7911        | 748.3992         | K    | <b>387.2602</b>  | 194.1337        | 370.2336       | 185.6205        |                 |                  | 2  |
| 13 |                  |                 |                  |                 |                  |                  | K    | 203.1390         | 102.0731        | 186.1125       | 93.5599         |                 |                  | 1  |

Match to Query 13960: 2121.168972 from(708.063600,3+) intensity(21604.1992)

Title: File1353 Spectrum9085 scans: 9769

Data file J:\2013-9-14-A549-Prometh-Fr5-ZW.mgf

Click mouse within plot area to zoom in by factor of two about that point

Or,  200 to  Da

Label all possible matches  Label matches used for scoring

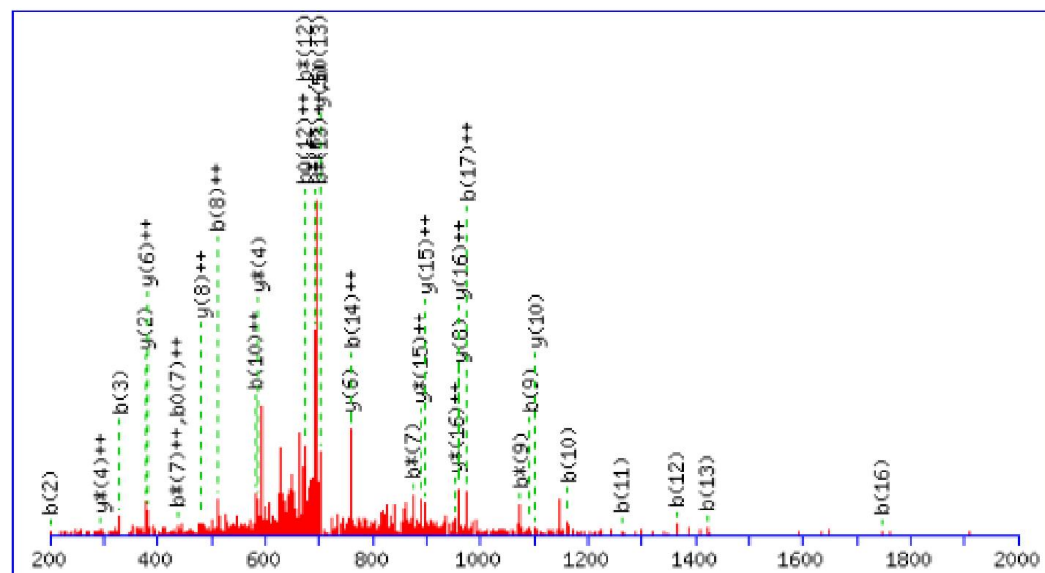

Monoisotopic mass of neutral peptide Mr(calc): 2121.1702

Fixed modifications: Carbamidomethyl (C) (apply to specified residues or termini on

Variable modifications:

K6 : Propionyl (K)

K7 : Propionyl (K)

K17 : Propionyl-(13CD3)Methyl (K)

Ions Score: 22 Expect: 3.8

Matches : 34/188 fragment ions using 83 most intense peaks [\(help\)](#)

| #  | b                | b <sup>++</sup> | b <sup>+</sup>   | b <sup>+++</sup> | b <sup>0</sup> | b <sup>0++</sup> | Seq | y                | y <sup>++</sup> | y <sup>+</sup>  | y <sup>+++</sup> | y <sup>0</sup> | y <sup>0++</sup> | #  |
|----|------------------|-----------------|------------------|------------------|----------------|------------------|-----|------------------|-----------------|-----------------|------------------|----------------|------------------|----|
| 1  | 129.0659         | 65.0366         | 112.0393         | 56.5233          |                |                  |     |                  |                 |                 |                  |                |                  | 18 |
| 2  | <b>200.1030</b>  | 100.5551        | 183.0764         | 92.0418          |                |                  | A   | 1994.1190        | 997.5631        | 1977.0924       | 989.0498         | 1976.1084      | 988.5578         | 17 |
| 3  | <b>329.1456</b>  | 165.0764        | 312.1190         | 156.5631         | 311.1350       | 156.0711         | E   | 1923.0818        | <b>902.0446</b> | 1906.0553       | <b>953.5313</b>  | 1905.0713      | 953.0393         | 16 |
| 4  | 426.1983         | 213.6028        | 409.1718         | 205.0895         | 408.1878       | 204.5975         | P   | 1794.0392        | <b>897.5233</b> | 1777.0127       | <b>889.0100</b>  | 1776.0287      | 888.5180         | 15 |
| 5  | 523.2511         | 262.1292        | 506.2245         | 253.6159         | 505.2405       | 253.1239         | P   | 1696.9865        | 848.9969        | 1679.9599       | 840.4836         | 1678.9759      | 839.9916         | 14 |
| 6  | 707.3723         | 354.1898        | <b>690.3457</b>  | 345.6765         | 689.3617       | 345.1845         | K   | 1599.9337        | 800.4705        | 1582.9072       | 791.9572         | 1581.9232      | 791.4652         | 13 |
| 7  | 891.4934         | 446.2504        | <b>874.4669</b>  | 437.7371         | 873.4829       | 437.2451         | K   | 1415.8125        | 708.4099        | 1398.7860       | 699.8966         | 1397.8020      | 699.4046         | 12 |
| 8  | 1020.5360        | <b>510.7717</b> | 1003.5095        | 502.2584         | 1002.5255      | 501.7664         | E   | 1231.6914        | 616.3493        | 1214.6648       | 607.8360         | 1213.6808      | 607.3440         | 11 |
| 9  | <b>1091.5732</b> | 546.2902        | <b>1074.5466</b> | 537.7769         | 1073.5626      | 537.2849         | A   | <b>1102.6488</b> | 551.8280        | 1085.6222       | 543.3147         | 1084.6382      | 542.8227         | 10 |
| 10 | <b>1162.6103</b> | <b>581.8088</b> | 1145.5837        | 573.2955         | 1144.5997      | 572.8035         | A   | 1031.6117        | 516.3095        | 1014.5851       | 507.7962         | 1013.6011      | 507.3042         | 9  |
| 11 | <b>1263.6579</b> | 632.3326        | 1246.6314        | 623.8193         | 1245.6474      | 623.3273         | T   | <b>960.5745</b>  | <b>480.7909</b> | 943.5480        | 472.2776         | 942.5640       | 471.7856         | 8  |
| 12 | <b>1364.7056</b> | 682.8565        | 1347.6791        | <b>674.3482</b>  | 1346.6951      | 673.8512         | T   | 859.5269         | 430.2671        | 842.5003        | 421.7538         | 841.5163       | 421.2618         | 7  |
| 13 | <b>1421.7271</b> | 711.3672        | 1404.7005        | <b>702.8539</b>  | 1403.7165      | <b>702.3619</b>  | G   | <b>758.4792</b>  | <b>379.7432</b> | 741.4526        | 371.2300         |                |                  | 6  |
| 14 | 1518.7799        | <b>759.8936</b> | 1501.7533        | 751.3803         | 1500.7693      | 750.8883         | P   | <b>701.4577</b>  | 351.2325        | 684.4312        | 342.7192         |                |                  | 5  |
| 15 | 1646.8384        | 823.9229        | 1629.8119        | 815.4096         | 1628.8279      | 814.9176         | Q   | 604.4050         | 302.7061        | <b>587.3784</b> | <b>294.1928</b>  |                |                  | 4  |
| 16 | <b>1745.9068</b> | 873.4571        | 1728.8903        | 864.9438         | 1727.8963      | 864.4518         | V   | 476.3464         | 238.6768        | 459.3198        | 230.1656         |                |                  | 3  |
| 17 | 1948.0659        | <b>974.5366</b> | 1931.0393        | 966.0233         | 1930.0553      | 965.5313         | K   | <b>377.2780</b>  | 189.1426        | 360.2514        | 180.6293         |                |                  | 2  |
| 18 |                  |                 |                  |                  |                |                  | R   | 175.1190         | 88.0631         | 158.0924        | 79.5498          |                |                  | 1  |

Found in **K7ELJ2**, PDZ domain-containing protein GIPC1 (Fragment) OS=Homo sapiens GN=GIPC1 PE=4 SV=1

Match to Query 11448: 1893.012428 from(947.513490,2+) intensity(12001.0371)  
 Title: File1353 Spectrum10527 scans: 11271  
 Data file J:\2013-9-14-A549-Prometh-Fr5-ZW.mgf

Click mouse within plot area to zoom in by factor of two about that point

Or,  200 to 1900 Da

Label all possible matches  Label matches used for scoring

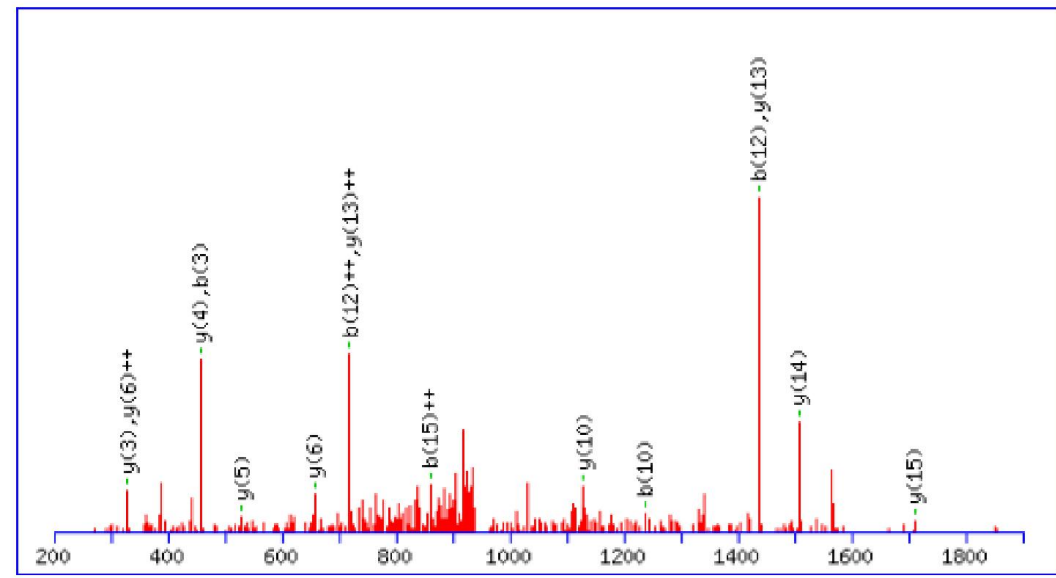

Monoisotopic mass of neutral peptide Mr(calc): 1893.0116  
 Fixed modifications: Carbamidomethyl (C) (apply to specified residues or termini only)  
 Variable modifications:  
 K1 : Propionyl (K)  
 K2 : Propionyl-(13CD3)Methyl (K)  
 Ions Score: 55 Expect: 0.0024  
 Matches : 15/160 fragment ions using 16 most intense peaks [\(help\)](#)

| #  | b                | b <sup>++</sup> | b <sup>+</sup> | b <sup>+++</sup> | b <sup>0</sup> | b <sup>0++</sup> | Seq. | y                | y <sup>++</sup> | y <sup>+</sup> | y <sup>+++</sup> | y <sup>0</sup> | y <sup>0++</sup> | #  |
|----|------------------|-----------------|----------------|------------------|----------------|------------------|------|------------------|-----------------|----------------|------------------|----------------|------------------|----|
| 1  | 185.1285         | 93.0679         | 168.1019       | 84.5546          |                |                  | K    |                  |                 |                |                  |                |                  | 16 |
| 2  | 387.2875         | 194.1474        | 370.2609       | 185.6341         |                |                  | K    | <b>1709.8977</b> | 855.4525        | 1692.8712      | 846.9392         | 1691.8872      | 846.4472         | 15 |
| 3  | <b>458.3246</b>  | 229.6659        | 441.2980       | 221.1527         |                |                  | A    | <b>1507.7387</b> | 754.3730        | 1490.7122      | 745.8597         | 1489.7281      | 745.3677         | 14 |
| 4  | 555.3773         | 278.1923        | 538.3508       | 269.6790         |                |                  | P    | <b>1436.7016</b> | <b>718.8544</b> | 1419.6751      | 710.3412         | 1418.6910      | 709.8492         | 13 |
| 5  | 652.4301         | 326.7187        | 635.4036       | 318.2054         |                |                  | P    | 1339.6488        | 670.3281        | 1322.6223      | 661.8148         | 1321.6383      | 661.3228         | 12 |
| 6  | 765.5142         | 383.2607        | 748.4876       | 374.7475         |                |                  | L    | 1242.5961        | 621.8017        | 1225.5695      | 613.2884         | 1224.5855      | 612.7964         | 11 |
| 7  | 864.5826         | 432.7949        | 847.5560       | 424.2817         |                |                  | V    | <b>1129.5120</b> | 565.2596        | 1112.4855      | 556.7464         | 1111.5014      | 556.2544         | 10 |
| 8  | 993.6252         | 497.3162        | 976.5986       | 488.8030         | 975.6146       | 488.3109         | E    | 1030.4436        | 515.7254        | 1013.4170      | 507.2122         | 1012.4330      | 506.7202         | 9  |
| 9  | 1107.6681        | 554.3377        | 1090.6416      | 545.8244         | 1089.6575      | 545.3324         | N    | 901.4010         | 451.2041        | 884.3745       | 442.6909         | 883.3904       | 442.1989         | 8  |
| 10 | <b>1236.7107</b> | 618.8590        | 1219.6842      | 610.3457         | 1218.7001      | 609.8537         | E    | 787.3581         | 394.1827        | 770.3315       | 385.6694         | 769.3475       | 385.1774         | 7  |
| 11 | 1365.7533        | 683.3803        | 1348.7267      | 674.8670         | 1347.7427      | 674.3750         | E    | <b>658.3155</b>  | <b>329.6614</b> | 641.2889       | 321.1481         | 640.3049       | 320.6561         | 6  |
| 12 | <b>1436.7904</b> | <b>718.8988</b> | 1419.7639      | 710.3856         | 1418.7798      | 709.8936         | A    | <b>529.2729</b>  | 265.1401        | 512.2463       | 256.6268         | 511.2623       | 256.1348         | 5  |
| 13 | 1565.8330        | 783.4201        | 1548.8065      | 774.9069         | 1547.8224      | 774.4149         | E    | <b>458.2358</b>  | 229.6215        | 441.2092       | 221.1082         | 440.2252       | 220.6162         | 4  |
| 14 | 1662.8858        | 831.9465        | 1645.8592      | 823.4332         | 1644.8752      | 822.9412         | P    | <b>329.1952</b>  | 165.1002        | 312.1666       | 156.5870         |                |                  | 3  |
| 15 | 1719.9072        | <b>860.4573</b> | 1702.8807      | 851.9440         | 1701.8967      | 851.4520         | G    | 232.1404         | 116.5738        | 215.1139       | 108.0606         |                |                  | 2  |
| 16 |                  |                 |                |                  |                |                  | R    | 175.1190         | 88.0631         | 158.0924       | 79.5498          |                |                  | 1  |

Match to Query 4699: 1345.747048 from(673.880800,2+) intensity(89151.6641)

Title: File1353 Spectrum10080 scans: 10806

Data file J:\2013-9-14-A549-Prometh-Fr5-ZW.mgf

Click mouse within plot area to zoom in by factor of two about that point

Or,   to  Da Label all possible matches  Label matches used for scoring 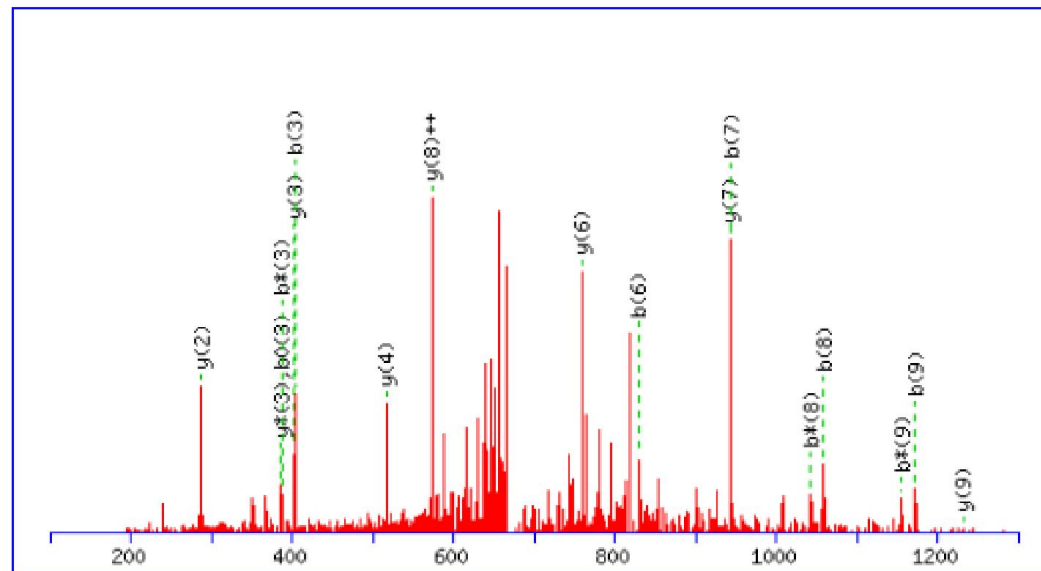

Monoisotopic mass of neutral peptide Mr(calc): 1345.7474

Fixed modifications: Carbamidomethyl (C) (apply to specified residue)

Variable modifications:

K3 : Propionyl-(13CD3)Methyl (K)

K4 : Propionyl (K)

Ions Score: 45 Expect: 0.015

Matches : 17/102 fragment ions using 22 most intense peaks

[\(help\)](#)

| #  | $b^-$            | $b^{++}$ | $b^+$            | $b^{*++}$ | $b^0$           | $b^{0++}$ | Seq. | y                | $y^{++}$        | $y^+$           | $y^{*++}$ | $y^0$     | $y^{0++}$ | #  |
|----|------------------|----------|------------------|-----------|-----------------|-----------|------|------------------|-----------------|-----------------|-----------|-----------|-----------|----|
| 1  | 115.0502         | 58.0287  | 98.0237          | 49.5155   |                 |           | N    |                  |                 |                 |           |           |           | 10 |
| 2  | 202.0822         | 101.5448 | 185.0557         | 93.0315   | 184.0717        | 92.5395   | S    | <b>1232.7118</b> | 616.8595        | 1215.6852       | 608.3462  | 1214.7012 | 607.8542  | 9  |
| 3  | <b>404.2412</b>  | 202.6243 | <b>387.2147</b>  | 194.1110  | <b>386.2307</b> | 193.6190  | K    | 1145.6797        | <b>573.3435</b> | 1128.6532       | 564.8302  | 1127.6692 | 564.3382  | 8  |
| 4  | 588.3624         | 294.6848 | 571.3359         | 286.1716  | 570.3519        | 285.6796  | K    | <b>943.5207</b>  | 472.2640        | 926.4942        | 463.7507  | 925.5102  | 463.2587  | 7  |
| 5  | 717.4050         | 359.2061 | 700.3785         | 350.6929  | 699.3945        | 350.2009  | E    | <b>759.3995</b>  | 380.2034        | 742.3730        | 371.6901  | 741.3890  | 371.1981  | 6  |
| 6  | <b>830.4891</b>  | 415.7482 | 813.4625         | 407.2349  | 812.4785        | 406.7429  | L    | 630.3569         | 315.6821        | 613.3304        | 307.1688  | 612.3464  | 306.6768  | 5  |
| 7  | <b>944.5320</b>  | 472.7696 | 927.5055         | 464.2564  | 926.5214        | 463.7644  | N    | <b>517.2729</b>  | 259.1401        | 500.2463        | 250.6268  | 499.2623  | 250.1348  | 4  |
| 8  | <b>1059.5589</b> | 530.2831 | <b>1042.5324</b> | 521.7698  | 1041.5484       | 521.2778  | D    | <b>403.2300</b>  | 202.1186        | <b>386.2034</b> | 193.6053  | 385.2194  | 193.1133  | 3  |
| 9  | <b>1172.6430</b> | 586.8251 | <b>1155.6165</b> | 578.3119  | 1154.6324       | 577.8199  | I    | <b>288.2030</b>  | 144.6051        | 271.1765        | 136.0919  |           |           | 2  |
| 10 |                  |          |                  |           |                 |           | R    | 175.1190         | 88.0631         | 158.0924        | 79.5498   |           |           | 1  |

Match to Query 9358: 1761.949428 from(881.981990, 2+) intensity(36421.2500)

Title: File1353 Spectrum4760 scans: 5262

Data file J:\2013-9-14-A549-Prometh-Fr5-ZW.mgf

Click mouse within plot area to zoom in by factor of two about that point

Or,   to  Da Label all possible matches  Label matches used for scoring 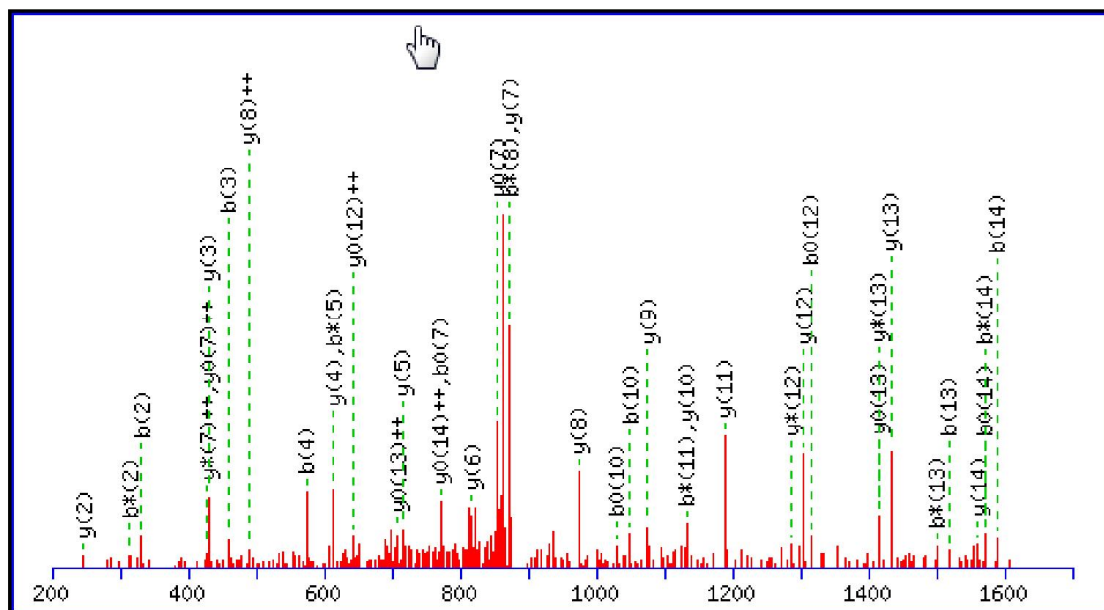Monoisotopic mass of neutral peptide **Mr(calc): 1761.9494**

Fixed modifications: Carbamidomethyl (C) (apply to specified

Variable modifications:

**K1** : Propionyl-(13CD3)Methyl (K)**K12** : Propionyl (K)**K13** : Propionyl (K)

Ions Score: 94 Expect: 2.2e-007

Matches : 39/154 fragment ions using 56 most intense peaks

| #  | b                | b <sup>++</sup> | b*               | b <sup>++</sup> | b <sup>0</sup>   | b <sup>0++</sup> | Seq. | y                | y <sup>++</sup> | y*               | y <sup>++</sup> | y <sup>0</sup>   | y <sup>0++</sup> | #  |
|----|------------------|-----------------|------------------|-----------------|------------------|------------------|------|------------------|-----------------|------------------|-----------------|------------------|------------------|----|
| 1  | 203.1663         | 102.0868        | 186.1397         | 93.5735         |                  |                  | K    |                  |                 |                  |                 |                  |                  | 15 |
| 2  | <b>331.2249</b>  | 166.1161        | <b>314.1983</b>  | 157.6023        |                  |                  | Q    | <b>1550.7976</b> | 780.9025        | 1543.7711        | 772.3892        | 1542.7871        | <b>771.8972</b>  | 14 |
| 3  | <b>459.2834</b>  | 230.1454        | 442.2569         | 221.6321        |                  |                  | Q    | <b>1432.7391</b> | 716.8732        | <b>1415.7125</b> | 708.3599        | <b>1414.7285</b> | <b>707.8679</b>  | 13 |
| 4  | <b>574.3104</b>  | 287.6583        | 557.2838         | 279.1456        | 556.2993         | 278.6535         | D    | <b>1304.6805</b> | 652.8439        | <b>1287.6539</b> | 644.3306        | 1286.6699        | <b>643.8386</b>  | 12 |
| 5  | 631.3319         | 316.1696        | <b>614.3053</b>  | 307.6563        | 613.3213         | 307.1643         | G    | <b>1189.6535</b> | 595.3304        | 1172.6270        | 586.8171        | 1171.6430        | 586.3251         | 11 |
| 6  | 698.3533         | 344.6803        | 671.3268         | 336.1670        | 670.3428         | 335.6750         | G    | <b>1132.6321</b> | 566.8197        | 1115.6055        | 558.3064        | 1114.6215        | 557.8144         | 10 |
| 7  | 789.4010         | 395.2041        | 772.3744         | 386.6909        | <b>771.3904</b>  | 386.1989         | T    | <b>1075.6106</b> | 538.3089        | 1058.5841        | 529.7957        | 1057.6000        | 529.3037         | 9  |
| 8  | 890.4487         | 445.7280        | <b>873.4221</b>  | 437.2147        | 872.4381         | 436.7227         | T    | <b>974.5629</b>  | <b>487.7851</b> | 957.5364         | 479.2718        | 956.5524         | <b>478.7798</b>  | 8  |
| 9  | 947.4701         | 474.2387        | 930.4436         | 465.7254        | 929.4596         | 465.2334         | G    | <b>873.5152</b>  | 437.2613        | 856.4887         | <b>428.7480</b> | <b>855.5047</b>  | <b>428.2560</b>  | 7  |
| 10 | <b>1048.5178</b> | 524.7625        | 1031.4913        | 516.2493        | <b>1030.5073</b> | 515.7573         | T    | <b>816.4938</b>  | 408.7505        | 799.4672         | 400.2373        | 798.4832         | 399.7452         | 6  |
| 11 | 1149.5855        | 575.2864        | <b>1132.5389</b> | 566.7731        | 1131.5549        | 566.2811         | T    | <b>715.4461</b>  | 358.2267        | 698.4196         | 349.7134        | 697.4355         | 349.2214         | 5  |
| 12 | 1333.6887        | 667.3470        | 1316.6601        | 658.8337        | <b>1315.6761</b> | 658.3417         | K    | <b>614.3984</b>  | 307.7028        | 597.3719         | 299.1896        |                  |                  | 4  |
| 13 | <b>1517.8079</b> | 759.4076        | <b>1500.7813</b> | 750.8943        | 1499.7973        | 750.4023         | K    | <b>430.2772</b>  | 215.6423        | 413.2507         | 207.1290        |                  |                  | 3  |
| 14 | <b>1588.8450</b> | 794.9261        | <b>1571.8184</b> | 786.4128        | <b>1570.8344</b> | 785.9208         | A    | <b>246.1561</b>  | 123.5817        | 229.1295         | 115.0684        |                  |                  | 2  |
| 15 |                  |                 |                  |                 |                  |                  | R    | 175.1190         | 88.0631         | 158.0924         | 79.5498         |                  |                  | 1  |

Found in Q14CN4-2, Isoform 2 of Keratin, type II cytoskeletal 72 OS=Homo sapiens GN=KRT72

Match to Query 18662: 2834.477382 from(945.833070, 3+) intensity(45862.6523)

Title: File1356 Spectrum18364 scans: 19493

Data file J:\2013-9-14-A549-Prometh-Fr3-ZW.mgf

Click mouse within plot area to zoom in by factor of two about that point

Or,   to  Da Label all possible matches  Label matches used for scoring 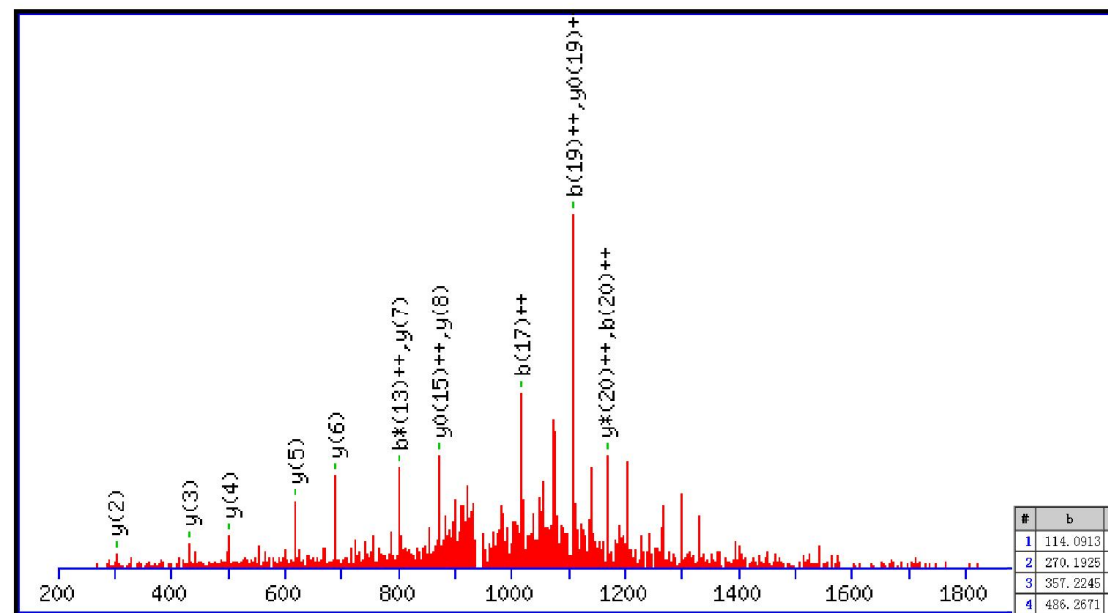**Monoisotopic mass of neutral peptide  $M_r(\text{calc})$ :** 2834.4989**Fixed modifications:** Carbamidomethyl (C) (apply to specified residue)**Variable modifications:****K9** : Propionyl-(13CD3)Methyl (K)**K10** : Propionyl-(13CD3)Methyl (K)**Ions Score:** 32 **Expect:** 0.56**Matches** : 14/266 fragment ions using 18 most intense peaks ([help](#))

| #  | b         | b <sup>++</sup> | b <sup>+</sup> | b <sup>+</sup> + | b <sup>0</sup> | b <sup>0</sup> + | Seq. | y         | y <sup>++</sup> | y <sup>+</sup> | y <sup>+</sup> + | y <sup>0</sup> | y <sup>0</sup> + | #  |
|----|-----------|-----------------|----------------|------------------|----------------|------------------|------|-----------|-----------------|----------------|------------------|----------------|------------------|----|
| 1  | 114.0913  | 57.5493         |                |                  |                |                  | I    |           |                 |                |                  |                |                  | 24 |
| 2  | 270.1925  | 138.5999        | 253.1659       | 127.0866         |                |                  | R    | 2722.4221 | 1361.7147       | 2705.3956      | 1353.2014        | 2704.4116      | 1352.7094        | 23 |
| 3  | 357.2245  | 179.1159        | 340.1979       | 170.6026         | 339.2139       | 170.1106         | S    | 2566.3210 | 1283.6642       | 2549.2945      | 1275.1509        | 2548.3105      | 1274.6589        | 22 |
| 4  | 488.2671  | 243.6372        | 469.2405       | 235.1239         | 468.2865       | 234.6319         | K    | 2479.2890 | 1240.1481       | 2462.2625      | 1231.6349        | 2461.2784      | 1231.1429        | 21 |
| 5  | 599.3511  | 300.1792        | 582.3246       | 291.6659         | 581.3405       | 291.1739         | I    | 2350.2464 | 1175.6268       | 2333.2199      | 1167.1136        | 2332.2358      | 1166.6216        | 20 |
| 6  | 656.3726  | 328.6899        | 639.3461       | 320.1767         | 638.3620       | 319.6847         | G    | 2237.1623 | 1119.0848       | 2220.1358      | 1110.5715        | 2219.1518      | 1110.0795        | 19 |
| 7  | 770.4155  | 385.7114        | 753.3890       | 377.1981         | 752.4050       | 376.7061         | N    | 2180.1409 | 1090.5741       | 2163.1143      | 1082.0608        | 2162.1303      | 1081.5688        | 18 |
| 8  | 869.4839  | 435.2456        | 852.4574       | 426.7323         | 851.4734       | 426.2403         | V    | 2066.0980 | 1033.5526       | 2049.0714      | 1025.0393        | 2048.0874      | 1024.5473        | 17 |
| 9  | 1071.6430 | 536.3251        | 1054.6164      | 527.8118         | 1053.6324      | 527.3198         | K    | 1967.0295 | 984.0184        | 1950.0030      | 975.5051         | 1949.0190      | 975.0131         | 16 |
| 10 | 1273.8020 | 637.4046        | 1256.7754      | 628.8913         | 1255.7914      | 628.3993         | K    | 1764.8705 | 882.9389        | 1747.8440      | 874.4256         | 1746.8600      | 873.9336         | 15 |
| 11 | 1433.8326 | 717.4199        | 1416.8061      | 708.9067         | 1415.8221      | 708.4147         | C    | 1562.7115 | 781.8594        | 1545.6850      | 773.3461         | 1544.7009      | 772.8541         | 14 |
| 12 | 1504.8697 | 752.9385        | 1487.8432      | 744.4252         | 1486.8592      | 743.9332         | A    | 1402.6809 | 701.8441        | 1385.6543      | 693.3308         | 1384.6703      | 692.8388         | 13 |
| 13 | 1619.8967 | 810.4520        | 1602.8701      | 801.9387         | 1601.8861      | 801.4467         | D    | 1331.6438 | 666.3255        | 1314.6172      | 657.8122         | 1313.6332      | 657.3202         | 12 |
| 14 | 1732.9807 | 866.9940        | 1715.9542      | 858.4807         | 1714.9702      | 857.9887         | L    | 1216.6168 | 608.8120        | 1199.5903      | 600.2988         | 1198.6062      | 599.8068         | 11 |
| 15 | 1862.0233 | 931.5153        | 1844.9968      | 923.0020         | 1844.0128      | 922.5100         | E    | 1103.5327 | 552.2700        | 1086.5062      | 543.7567         | 1085.5222      | 543.2647         | 10 |
| 16 | 1963.0710 | 982.0391        | 1946.0445      | 973.5259         | 1945.0604      | 973.0339         | T    | 974.4902  | 487.7487        | 957.4636       | 479.2354         | 956.4796       | 478.7434         | 9  |
| 17 | 2034.1081 | 1017.5677       | 2017.0816      | 1009.0444        | 2016.0976      | 1008.5524        | A    | 873.4425  | 437.2249        | 856.4159       | 428.7116         | 855.4319       | 428.2196         | 8  |
| 18 | 2147.1922 | 1074.0397       | 2130.1656      | 1065.5865        | 2129.1816      | 1065.0944        | I    | 802.4054  | 407.7063        | 785.3768       | 393.1930         | 784.3948       | 392.7010         | 7  |
| 19 | 2218.2293 | 1109.6183       | 2201.2028      | 1101.1050        | 2200.2187      | 1100.6130        | A    | 689.3213  | 345.1643        | 672.2947       | 336.6510         | 671.3107       | 336.1590         | 6  |
| 20 | 2333.2562 | 1167.1318       | 2316.2297      | 1158.6185        | 2315.2457      | 1158.1265        | D    | 618.2842  | 309.6457        | 601.2576       | 301.1325         | 600.2736       | 300.6404         | 5  |
| 21 | 2404.2934 | 1202.6503       | 2387.2668      | 1194.1370        | 2386.2828      | 1193.6450        | A    | 503.2572  | 252.1323        | 486.2307       | 243.6190         | 485.2467       | 243.1270         | 4  |
| 22 | 2533.3360 | 1267.1716       | 2516.3094      | 1258.6583        | 2515.3254      | 1258.1663        | E    | 432.2201  | 216.6137        | 415.1936       | 208.1004         | 414.2096       | 207.6084         | 3  |
| 23 | 2661.3945 | 1331.2009       | 2644.3680      | 1322.6876        | 2643.3840      | 1322.1956        | Q    | 303.1775  | 152.0924        | 286.1510       | 143.5791         |                |                  | 2  |
| 24 |           |                 |                |                  |                |                  | R    | 175.1190  | 88.0631         | 158.0924       | 79.5498          |                |                  | 1  |

Found in **Q6ZRS2**, Helicase SRCAP OS=Homo sapiens GN=SRCAP PE=1 SV=3

Match to Query 4492: 1199.714448 from(600.864500,2+) intensity(23520.7617)

Title: File1356 Spectrum6144 scans: 6722

Data file J:\2013-9-14-A549-Prometh-Fr3-ZW.mgf

Click mouse within plot area to zoom in by factor of two about that point

Or,   to  Da Label all possible matches  Label matches used for scoring 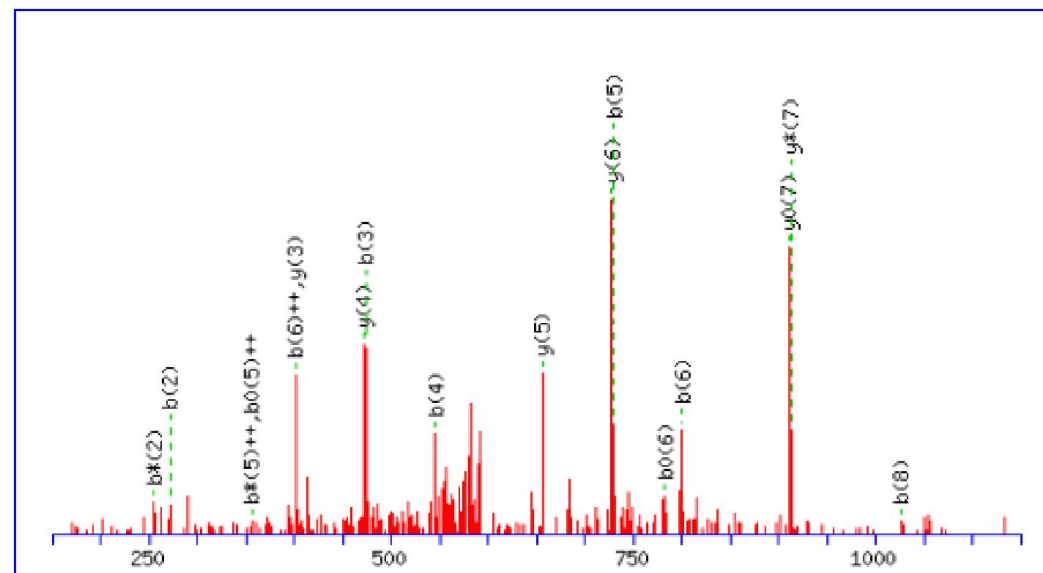

Monoisotopic mass of neutral peptide Mr(calc): 1199.7146

Fixed modifications: Carbamidomethyl (C) (apply to specified residues or termini only)

Variable modifications:

K2 : Propionyl (K)

K3 : Propionyl-(13CD3)Methyl (K)

K5 : Propionyl (K)

Ions Score: 35 Expect: 0.09

Matches : 17/92 fragment ions using 29 most intense peaks ([help](#))

| # | b                | b <sup>++</sup> | b <sup>+</sup>  | b <sup>++</sup> | b <sup>0</sup>  | b <sup>0++</sup> | Seq. | y               | y <sup>++</sup> | y <sup>+</sup>  | y <sup>++</sup> | y <sup>0</sup>  | y <sup>0++</sup> | # |
|---|------------------|-----------------|-----------------|-----------------|-----------------|------------------|------|-----------------|-----------------|-----------------|-----------------|-----------------|------------------|---|
| 1 | 88.0393          | 44.5233         |                 |                 | 70.0287         | 35.5180          | S    |                 |                 |                 |                 |                 |                  | 9 |
| 2 | <b>272.1605</b>  | 136.5839        | <b>255.1339</b> | 128.0706        | 254.1499        | 127.5786         | K    | 1113.6899       | 537.3486        | 1096.6634       | 548.8353        | 1095.6793       | 548.3433         | 8 |
| 3 | <b>474.3195</b>  | 237.6634        | 457.2929        | 229.1501        | 456.3089        | 228.6581         | K    | 929.5687        | 465.2880        | <b>912.5422</b> | 456.7747        | <b>911.5582</b> | 456.2827         | 7 |
| 4 | <b>545.3566</b>  | 273.1819        | 528.3301        | 264.6687        | 527.3460        | 264.1767         | A    | <b>727.4097</b> | 364.2085        | 710.3832        | 355.6952        | 709.3991        | 355.2032         | 6 |
| 5 | <b>729.4778</b>  | 365.2425        | 712.4512        | <b>356.7293</b> | 711.4672        | <b>356.2372</b>  | K    | <b>656.3726</b> | 328.6899        | 639.3461        | 320.1767        | 638.3620        | 319.6847         | 5 |
| 6 | <b>800.5149</b>  | 400.7611        | 783.4884        | 392.2478        | <b>782.5043</b> | 391.7558         | A    | <b>472.2514</b> | 236.6293        | 455.2249        | 228.1161        | 454.2409        | 227.6241         | 4 |
| 7 | 897.5677         | 449.2875        | 880.5411        | 440.7742        | 879.5571        | 440.2822         | P    | <b>401.2143</b> | 201.1108        | 384.1878        | 192.5975        | 383.2037        | 192.1055         | 3 |
| 8 | <b>1026.6103</b> | 513.8088        | 1009.5837       | 505.2955        | 1008.5997       | 504.8035         | E    | 304.1615        | 152.5844        | 287.1350        | 144.0711        | 286.1510        | 143.5791         | 2 |
| 9 |                  |                 |                 |                 |                 |                  | R    | 175.1190        | 88.0631         | 158.0924        | 79.5498         |                 |                  | 1 |

Found in **G5E9G6**, E3 ubiquitin-protein ligase TRIP12 OS=Homo sapiens GN=TRIP12 PE=2 SV=1

Match to Query 1792: 932.591648 from(467.303100,2+) intensity(6766.3755)

Title: File1356 Spectrum4556 scans: 5066

Data file J:\2013-9-14-A549-Prometh-Fr3-ZW.mgf

Click mouse within plot area to zoom in by factor of two about that point

Or,   to  Da Label all possible matches  Label matches used for scoring 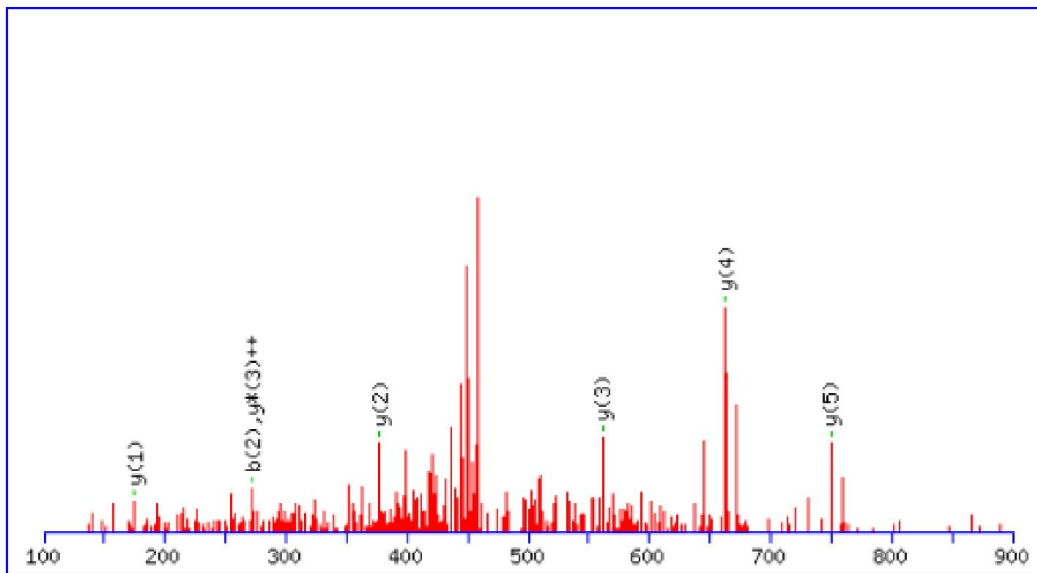

Monoisotopic mass of neutral peptide Mr(calc): 932.5927

Fixed modifications: Carbamidomethyl (C) (apply to specified residues or termini only)

Variable modifications:

K1 : Propionyl (K)

K4 : Propionyl (K)

K5 : Propionyl-(13CD3)Methyl (K)

Ions Score: 43 Expect: 0.0083

Matches : 7/52 fragment ions using 8 most intense peaks ([help](#))

| # | b        | b <sup>++</sup> | b <sup>*</sup> | b <sup>+++</sup> | b <sup>0</sup> | b <sup>0++</sup> | Seq. | y        | y <sup>++</sup> | y <sup>*</sup> | y <sup>+++</sup> | y <sup>0</sup> | y <sup>0++</sup> | # |
|---|----------|-----------------|----------------|------------------|----------------|------------------|------|----------|-----------------|----------------|------------------|----------------|------------------|---|
| 1 | 185.1285 | 93.0679         | 168.1019       | 84.5546          |                |                  | K    |          |                 |                |                  |                |                  | 6 |
| 2 | 272.1605 | 136.5839        | 255.1339       | 128.0706         | 254.1499       | 127.5786         | S    | 749.4789 | 375.2431        | 732.4523       | 366.7298         | 731.4683       | 366.2378         | 5 |
| 3 | 373.2082 | 187.1077        | 356.1816       | 178.5944         | 355.1976       | 178.1024         | T    | 662.4468 | 331.7270        | 645.4203       | 323.2138         | 644.4363       | 322.7218         | 4 |
| 4 | 557.3293 | 279.1683        | 540.3028       | 270.6550         | 539.3188       | 270.1630         | K    | 561.3991 | 281.2032        | 544.3726       | 272.6899         |                |                  | 3 |
| 5 | 759.4884 | 380.2478        | 742.4618       | 371.7345         | 741.4778       | 371.2425         | K    | 377.2780 | 189.1426        | 360.2514       | 180.6293         |                |                  | 2 |
| 6 |          |                 |                |                  |                |                  | R    | 175.1190 | 88.0631         | 158.0924       | 79.5498          |                |                  | 1 |



Match to Query 18714: 2847.508092 from(950.176640, 3+) intensity(58247.6367)

Title: File1356 Spectrum16044 scans: 17045

Data file J:\2013-9-14-A549-Prometh-Fr3-ZW.mgf

Click mouse within plot area to zoom in by factor of two about that point

Or,   to  Da Label all possible matches  Label matches used for scoring 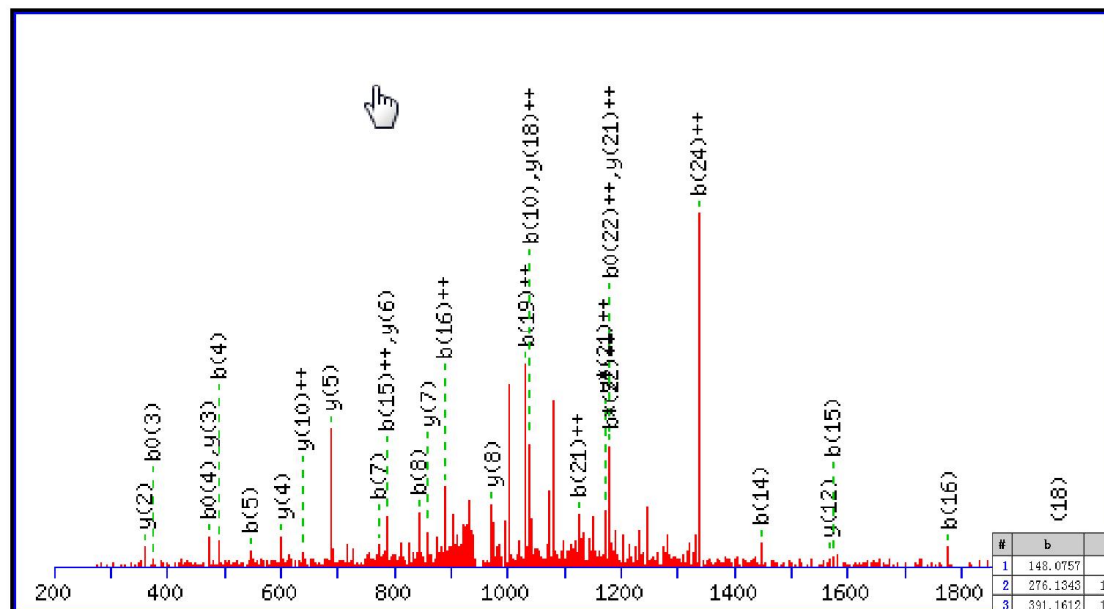**Monoisotopic mass of neutral peptide Mr(calc): 2847.5040****Fixed modifications:** Carbamidomethyl (C) (apply to specified residue)**Variable modifications:****K16** : Propionyl-(13CD3)Methyl (K)**K24** : Propionyl (K)**Ions Score:** 45 **Expect:** 0.025**Matches** : 30/276 fragment ions using 51 most intense peaks ([help](#))

| #  | b                | b <sup>++</sup>  | b <sup>+</sup> | b <sup>+++</sup> | b <sup>0</sup>   | b <sup>0++</sup> | Seq. | y                | y <sup>++</sup>  | y <sup>+</sup> | y <sup>+++</sup> | y <sup>0</sup> | y <sup>0++</sup> | #  |
|----|------------------|------------------|----------------|------------------|------------------|------------------|------|------------------|------------------|----------------|------------------|----------------|------------------|----|
| 1  | 148.0757         | 74.5415          |                |                  |                  |                  | F    |                  |                  |                |                  |                |                  | 25 |
| 2  | 276.1343         | 138.5708         | 259.1077       | 130.0575         |                  |                  | Q    | 2701.4428        | 1351.2250        | 2634.4163      | 1342.7118        | 2633.4322      | 1342.2198        | 24 |
| 3  | 391.1612         | 196.0842         | 374.1347       | 187.5710         | 373.1506         | 187.0790         | D    | 2573.3842        | 1287.1958        | 2556.3577      | 1278.6825        | 2555.3737      | 1278.1905        | 23 |
| 4  | <b>490.2296</b>  | 245.6185         | 473.2031       | 237.1052         | <b>472.2191</b>  | 236.6132         | V    | 2458.3573        | 1229.6823        | 2441.3307      | 1221.1690        | 2440.3467      | 1220.6770        | 22 |
| 5  | <b>547.2511</b>  | 274.1293         | 530.2245       | 265.6159         | 529.2405         | 265.1239         | G    | 2359.2889        | <b>1180.1481</b> | 2342.2623      | <b>1171.6348</b> | 2341.2783      | 1171.1428        | 21 |
| 6  | 644.3039         | 322.6556         | 627.2773       | 314.1423         | 626.2933         | 313.6503         | P    | 2302.2674        | 1151.6373        | 2285.2409      | 1143.1241        | 2284.2568      | 1142.6321        | 20 |
| 7  | <b>772.3624</b>  | 386.6849         | 755.3359       | 378.1716         | 754.3519         | 377.6796         | Q    | 2205.2146        | <b>1103.1110</b> | 2188.1381      | 1094.5977        | 2187.2041      | 1094.1057        | 19 |
| 8  | <b>843.3995</b>  | 422.2034         | 826.3730       | 413.6901         | 825.3890         | 413.1981         | A    | 2077.1561        | <b>1039.0817</b> | 2060.1295      | 1030.5634        | 2059.1455      | 1030.0764        | 18 |
| 9  | 940.4523         | 470.7298         | 923.4258       | 462.2165         | 922.4417         | 461.7245         | P    | 2006.1190        | 1003.5631        | 1989.0924      | 995.0498         | 1988.1034      | 994.5578         | 17 |
| 10 | <b>1039.5207</b> | 520.2640         | 1022.4942      | 511.7507         | 1021.5102        | 511.2587         | V    | 1909.0662        | 955.0367         | 1892.0396      | 946.5235         | 1891.0556      | 946.0315         | 16 |
| 11 | 1096.5422        | 548.7747         | 1079.5156      | 540.2615         | 1078.5316        | 539.7694         | C    | 1809.9972        | 905.5025         | 1792.9712      | 896.9893         | 1791.9872      | 896.4972         | 15 |
| 12 | 1183.6742        | 592.2907         | 1166.5477      | 583.7775         | 1165.5637        | 583.2855         | S    | 1752.9763        | 876.9948         | 1735.9498      | 868.4785         | 1734.9657      | 867.9865         | 14 |
| 13 | 1282.6426        | 641.8250         | 1265.6161      | 633.3117         | 1264.6321        | 632.8197         | V    | 1665.9443        | 833.4758         | 1648.9177      | 824.9625         | 1647.9337      | 824.4705         | 13 |
| 14 | <b>1445.7060</b> | 723.3566         | 1428.6794      | 714.8433         | 1427.6954        | 714.3513         | Y    | <b>1566.8759</b> | 783.9416         | 1549.8493      | 775.4283         | 1548.8653      | 774.9363         | 12 |
| 15 | <b>1573.7645</b> | <b>787.3859</b>  | 1556.7380      | 778.8726         | 1555.7540        | 778.3806         | Q    | 1403.8125        | 702.4099         | 1386.7850      | 693.8966         | 1385.8020      | 693.4046         | 11 |
| 16 | <b>1775.9235</b> | <b>888.4654</b>  | 1758.8970      | 879.9521         | 1757.9130        | 879.4601         | K    | 1275.7540        | <b>638.3806</b>  | 1258.7274      | 629.8673         | 1257.7434      | 629.3753         | 10 |
| 17 | 1876.9712        | 938.9893         | 1859.9447      | 930.4760         | 1858.9607        | 929.9840         | T    | 1073.5949        | 537.3011         | 1056.5634      | 528.7878         | 1055.5844      | 528.2958         | 9  |
| 18 | 1991.0142        | 996.0107         | 1973.9876      | 987.4974         | <b>1973.0036</b> | 987.0054         | N    | <b>972.5473</b>  | 486.7773         | 955.5207       | 478.2640         | 954.5367       | 477.7720         | 8  |
| 19 | 2062.0513        | <b>1031.5293</b> | 2045.0247      | 1023.0160        | 2044.0407        | 1022.5240        | A    | <b>858.5043</b>  | 429.7558         | 841.4778       | 421.2425         | 840.4938       | 420.7505         | 7  |
| 20 | 2161.1197        | 1081.0635        | 2144.0931      | 1072.5502        | 2143.1091        | 1072.0582        | V    | <b>787.4672</b>  | 394.2373         | 770.4407       | 385.7240         | 769.4567       | 385.2320         | 6  |
| 21 | 2248.1517        | <b>1124.5795</b> | 2231.1252      | 1116.0662        | 2230.1411        | 1115.5742        | S    | <b>668.3968</b>  | 344.7030         | 671.3723       | 336.1898         | 670.3883       | 335.6978         | 5  |
| 22 | 2377.1943        | 1189.1008        | 2360.1678      | <b>1180.5875</b> | 2359.1837        | 1180.0955        | E    | <b>601.3668</b>  | 301.1870         | 584.3402       | 292.6738         | 583.3562       | 292.1817         | 4  |
| 23 | 2490.2784        | 1245.6428        | 2473.2518      | 1237.1295        | 2472.2678        | 1236.6375        | I    | <b>472.3242</b>  | 236.6657         | 455.2976       | 228.1525         |                |                  | 3  |
| 24 | 2674.3995        | <b>1337.7034</b> | 2657.3730      | 1329.1901        | 2656.3890        | 1328.6981        | K    | <b>359.2401</b>  | 180.1237         | 342.2136       | 171.6104         |                |                  | 2  |
| 25 |                  |                  |                |                  |                  |                  | R    | 175.1190         | 88.0631          | 158.0924       | 79.5498          |                |                  | 1  |

Match to Query 2535: 1007.633648 from(504.824100,2+) intensity(17939.4902)

Title: File1356 Spectrum12225 scans: 13066

Data file J:\2013-9-14-A549-Prometh-Fr3-ZW.mgf

Click mouse within plot area to zoom in by factor of two about that point

Or,  150 to 950 Da Label all possible matches  Label matches used for scoring 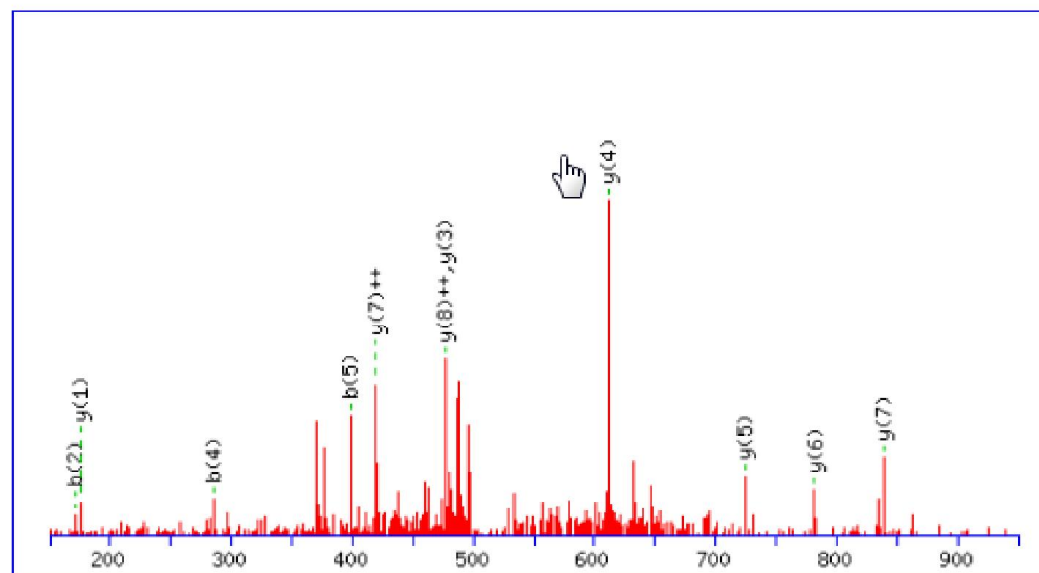

Monoisotopic mass of neutral peptide Mr(calc): 1007.6343

Fixed modifications: Carbamidomethyl (C) (apply to specified residues or termini only)

Variable modifications:

M6 : Label:13C(1)2H(3) (M)

K8 : Propionyl-(13CD3)Methyl (K)

Ions Score: 45 Expect: 0.0056

Matches : 11/50 fragment ions using 16 most intense peaks ([help](#))

| # | b               | b <sup>++</sup> | b <sup>+</sup> | b <sup>+++</sup> | Seq. | y               | y <sup>++</sup> | y <sup>+</sup> | y <sup>+++</sup> | # |
|---|-----------------|-----------------|----------------|------------------|------|-----------------|-----------------|----------------|------------------|---|
| 1 | 58.0287         | 29.5180         |                |                  | G    |                 |                 |                |                  | 9 |
| 2 | <b>171.1128</b> | 86.0600         |                |                  | L    | 951.6201        | <b>476.3137</b> | 934.5936       | 467.8004         | 8 |
| 3 | 228.1343        | 114.5708        |                |                  | G    | <b>838.5360</b> | <b>419.7717</b> | 821.5095       | 411.2584         | 7 |
| 4 | <b>285.1557</b> | 143.0815        |                |                  | G    | <b>781.5146</b> | 391.2609        | 764.4880       | 382.7477         | 6 |
| 5 | <b>398.2398</b> | 199.6235        |                |                  | I    | <b>724.4931</b> | 362.7502        | 707.4666       | 354.2369         | 5 |
| 6 | 533.3025        | 267.1549        |                |                  | M    | <b>611.4090</b> | 306.2082        | 594.3825       | 297.6949         | 4 |
| 7 | 632.3709        | 316.6891        |                |                  | V    | <b>476.3464</b> | 238.6768        | 459.3198       | 230.1636         | 3 |
| 8 | 834.5299        | 417.7686        | 817.5033       | 409.2553         | K    | 377.2780        | 189.1426        | 360.2514       | 180.6293         | 2 |
| 9 |                 |                 |                |                  | R    | <b>175.1190</b> | 88.0631         | 158.0924       | 79.5498          | 1 |

Match to Query 6287: 1332.763288 from(667.388920,2+) intensity(11596.7998)

Title: File1338 Spectrum4165 scans: 4664

Data file I:\2013-9-14-A549-Prometh-Fr2-ZW.mgf

Click mouse within plot area to zoom in by factor of two about that point

Or,   to  Da Label all possible matches  Label matches used for scoring 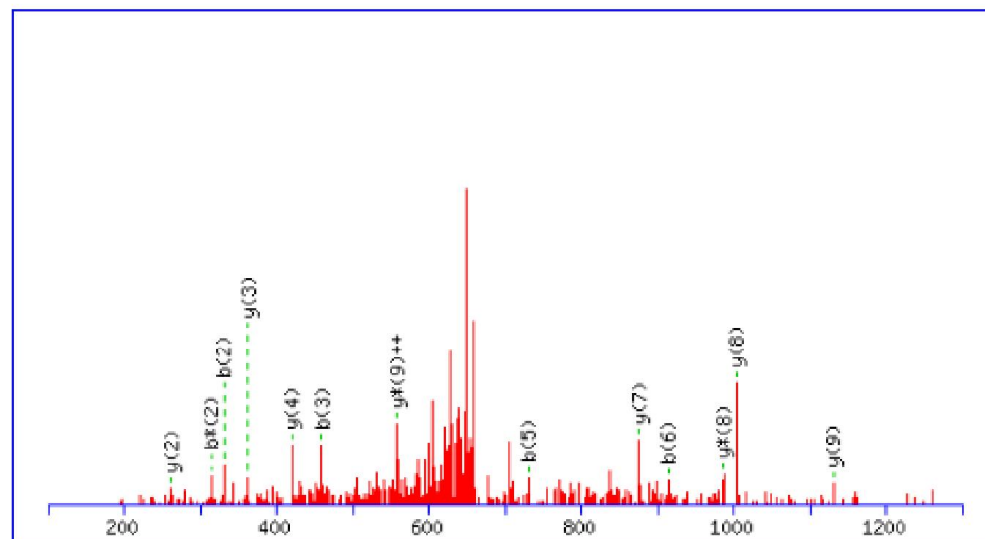

Monoisotopic mass of neutral peptide Mr(calc): 1332.7634

Fixed modifications: Carbamidomethyl (C) (apply to specified residues or termini only)

Variable modifications:

K1 : Propionyl-(13CD3)Methyl (K)

K5 : Propionyl (K)

K6 : Propionyl (K)

Ions Score: 26 Expect: 0.97

Matches : 13/100 fragment ions using 33 most intense peaks [\(help\)](#)

| #  | b               | b <sup>++</sup> | b <sup>+</sup>  | b <sup>+++</sup> | b <sup>0</sup> | b <sup>0++</sup> | Seq. | y                | y <sup>++</sup> | y <sup>+</sup>  | y <sup>+++</sup> | y <sup>0</sup> | y <sup>0++</sup> | #  |
|----|-----------------|-----------------|-----------------|------------------|----------------|------------------|------|------------------|-----------------|-----------------|------------------|----------------|------------------|----|
| 1  | 203.1663        | 102.0868        | 186.1397        | 93.5735          |                |                  | K    |                  |                 |                 |                  |                |                  | 10 |
| 2  | <b>331.2249</b> | 166.1161        | <b>314.1983</b> | 157.6028         |                |                  | Q    | <b>1131.6117</b> | 566.3095        | 1114.5851       | <b>557.7962</b>  | 1113.6011      | 557.3042         | 9  |
| 3  | <b>459.2834</b> | 230.1454        | 442.2569        | 221.6321         |                |                  | Q    | <b>1003.5531</b> | 502.2802        | <b>986.5265</b> | 493.7609         | 985.5425       | 493.2749         | 8  |
| 4  | 546.3155        | 273.6614        | 529.2889        | 265.1481         | 528.3049       | 264.6561         | S    | <b>875.4945</b>  | 438.2509        | 858.4680        | 429.7376         | 857.4839       | 429.2456         | 7  |
| 5  | <b>730.4367</b> | 365.7220        | 713.4101        | 357.2087         | 712.4261       | 356.7167         | K    | 788.4625         | 394.7349        | 771.4359        | 386.2216         | 770.4519       | 385.7296         | 6  |
| 6  | <b>914.5578</b> | 457.7826        | 897.5313        | 449.2693         | 896.5473       | 448.7773         | K    | 604.3413         | 302.6743        | 587.3148        | 294.1610         | 586.3307       | 293.6690         | 5  |
| 7  | 971.5793        | 486.2933        | 954.5527        | 477.7800         | 953.5687       | 477.2880         | G    | <b>420.2201</b>  | 210.6137        | 403.1936        | 202.1004         | 402.2096       | 201.6084         | 4  |
| 8  | 1072.6270       | 536.8171        | 1055.6004       | 528.3038         | 1054.6164      | 527.8118         | T    | <b>363.1987</b>  | 182.1030        | 346.1721        | 173.5897         | 345.1881       | 173.0977         | 3  |
| 9  | 1159.6590       | 580.3331        | 1142.6325       | 571.8199         | 1141.6484      | 571.3279         | S    | <b>262.1510</b>  | 131.5791        | 245.1244        | 123.0659         | 244.1404       | 122.5738         | 2  |
| 10 |                 |                 |                 |                  |                |                  | R    | 175.1190         | 88.0631         | 158.0924        | 79.5498          |                |                  | 1  |

MS/MS Fragmentation of **YEGHPAEGTKSKWGMIPR**

Found in **H0YIQ2**, YLP motif-containing protein 1 (Fragment) OS=Homo sapiens GN=YLPM1 PE=2 SV=1

Match to Query 15394: 2177.112822 from(726.711550,3+) intensity(88199.8828)  
Title: File1338 Spectrum14403 scans: 15372  
Data file I:\2013-9-14-A549-Prometh-Fr2-ZW.mgf

Click mouse within plot area to zoom in by factor of two about that point

Or,  to  Da

Label all possible matches  Label matches used for scoring

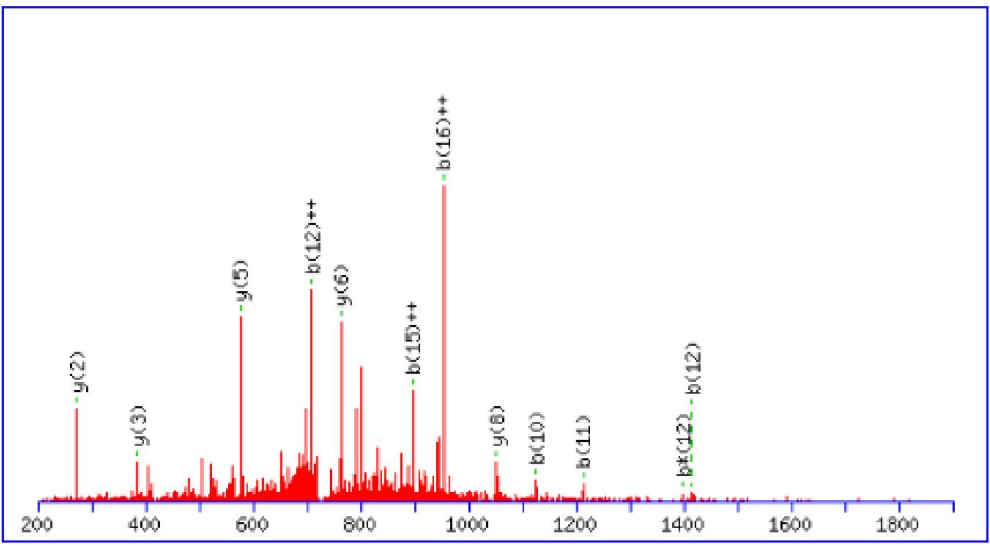

Monoisotopic mass of neutral peptide Mr(calc) : 2177.1121

Fixed modifications: Carbamidomethyl (C) (apply to specified residues or termini only)

Variable modifications:

- K10 : Propionyl (K)
- K12 : Propionyl-(13CD3)Methyl (K)
- M15 : Label:13C(1)2H(3) (M)

Ions Score: 26 Expect: 1.7

Matches : 12/170 fragment ions using 17 most intense peaks [\(help\)](#)

| #  | b         | b <sup>++</sup> | b <sup>*</sup> | b <sup>+++</sup> | b <sup>0</sup> | b <sup>0++</sup> | Seq. | y         | y <sup>++</sup> | y <sup>*</sup> | y <sup>+++</sup> | y <sup>0</sup> | y <sup>0++</sup> | #  |
|----|-----------|-----------------|----------------|------------------|----------------|------------------|------|-----------|-----------------|----------------|------------------|----------------|------------------|----|
| 1  | 164.0706  | 82.5389         |                |                  |                |                  | Y    |           |                 |                |                  |                |                  | 18 |
| 2  | 293.1132  | 147.0602        |                |                  | 275.1026       | 138.0550         | E    | 2015.0560 | 1008.0317       | 1998.0295      | 999.5184         | 1997.0455      | 999.0264         | 17 |
| 3  | 350.1347  | 175.5710        |                |                  | 332.1241       | 166.5657         | G    | 1886.0134 | 943.5104        | 1868.9869      | 934.9971         | 1868.0029      | 934.5051         | 16 |
| 4  | 487.1936  | 244.1004        |                |                  | 469.1830       | 235.0951         | H    | 1828.9920 | 914.9996        | 1811.9654      | 906.4863         | 1810.9814      | 905.9943         | 15 |
| 5  | 584.2463  | 292.6268        |                |                  | 566.2358       | 283.6215         | P    | 1691.9331 | 846.4702        | 1674.9065      | 837.9569         | 1673.9225      | 837.4649         | 14 |
| 6  | 655.2835  | 328.1454        |                |                  | 637.2729       | 319.1401         | A    | 1594.8803 | 797.9438        | 1577.8537      | 789.4305         | 1576.8697      | 788.9385         | 13 |
| 7  | 784.3260  | 392.6667        |                |                  | 766.3155       | 383.6614         | E    | 1523.8432 | 762.4252        | 1506.8166      | 753.9120         | 1505.8326      | 753.4199         | 12 |
| 8  | 841.3475  | 421.1774        |                |                  | 823.3369       | 412.1721         | G    | 1394.8006 | 697.9039        | 1377.7740      | 689.3907         | 1376.7900      | 688.8987         | 11 |
| 9  | 942.3952  | 471.7012        |                |                  | 924.3846       | 462.6959         | I    | 1337.7791 | 669.3932        | 1320.7526      | 660.8799         | 1319.7686      | 660.3879         | 10 |
| 10 | 1126.5164 | 563.7618        | 1109.4898      | 555.2485         | 1108.5058      | 554.7565         | K    | 1236.7314 | 618.8694        | 1219.7049      | 610.3561         | 1218.7209      | 609.8641         | 9  |
| 11 | 1213.5484 | 607.2778        | 1196.5218      | 598.7646         | 1195.5378      | 598.2726         | S    | 1052.6193 | 526.8088        | 1035.5837      | 518.2955         | 1034.5997      | 517.8035         | 8  |
| 12 | 1415.7074 | 708.3573        | 1398.6809      | 699.8441         | 1397.6968      | 699.3521         | K    | 965.5782  | 483.2928        | 948.5517       | 474.7795         |                |                  | 7  |
| 13 | 1601.7867 | 801.3970        | 1584.7602      | 792.8837         | 1583.7762      | 792.3917         | W    | 763.4192  | 382.2133        | 746.3927       | 373.7000         |                |                  | 6  |
| 14 | 1658.8082 | 829.9077        | 1641.7816      | 821.3945         | 1640.7976      | 820.9024         | G    | 577.3399  | 289.1736        | 560.3134       | 280.6603         |                |                  | 5  |
| 15 | 1793.8709 | 897.4391        | 1776.8443      | 888.9258         | 1775.8603      | 888.4338         | M    | 520.3184  | 260.6629        | 503.2919       | 252.1496         |                |                  | 4  |
| 16 | 1906.9549 | 953.9811        | 1889.9284      | 945.4678         | 1888.9444      | 944.9758         | I    | 385.2558  | 193.1315        | 368.2292       | 184.6183         |                |                  | 3  |
| 17 | 2004.0077 | 1002.5075       | 1986.9811      | 993.9942         | 1985.9971      | 993.5022         | P    | 272.1717  | 136.5895        | 255.1452       | 128.0762         |                |                  | 2  |
| 18 |           |                 |                |                  |                |                  | R    | 175.1190  | 88.0631         | 158.0924       | 79.5498          |                |                  | 1  |

Match to Query 8467: 1573.879728 from(787.947140,2+) intensity(352652.6250)

Title: File1338 Spectrum13723 scans: 14664

Data file I:\2013-9-14-A549-Prometh-Fr2-ZW.mgf

Click mouse within plot area to zoom in by factor of two about that point

Or,   to  Da Label all possible matches  Label matches used for scoring 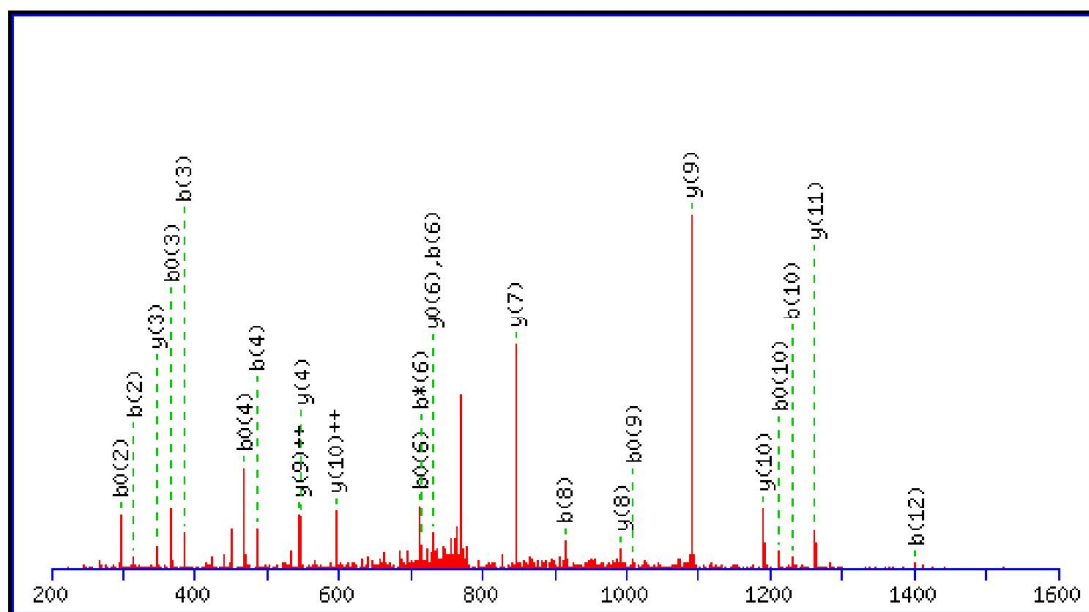Monoisotopic mass of neutral peptide  $M_r(\text{calc})$ : 1573.8737

Fixed modifications: Carbamidomethyl (C) (apply to specified residues or

Variable modifications:

K2 : Propionyl (K)

K10 : Propionyl-(13CD3)Methyl (K)

Ions Score: 45 Expect: 0.016

Matches : 24/132 fragment ions using 40 most intense peaks ([help](#))

| #  | b                | b <sup>+</sup> | b <sup>*</sup>  | b <sup>++</sup> | b <sup>0</sup>   | b <sup>0+</sup> | Seq. | y                | y <sup>+</sup>  | y <sup>*</sup> | y <sup>++</sup> | y <sup>0</sup>  | y <sup>0+</sup> | #  |
|----|------------------|----------------|-----------------|-----------------|------------------|-----------------|------|------------------|-----------------|----------------|-----------------|-----------------|-----------------|----|
| 1  | 130.0499         | 65.5286        |                 |                 | 112.0393         | 56.5233         | E    |                  |                 |                |                 |                 |                 | 13 |
| 2  | <b>314.1710</b>  | 157.5892       | 297.1445        | 149.0759        | <b>296.1605</b>  | 148.5839        | K    | 1445.8384        | 723.4228        | 1428.8118      | 714.9095        | 1427.8278       | 714.4175        | 12 |
| 3  | <b>385.2082</b>  | 193.1077       | 368.1816        | 184.5944        | <b>367.1976</b>  | 184.1024        | A    | <b>1261.7172</b> | 631.3622        | 1244.6906      | 622.8490        | 1243.7066       | 622.3569        | 11 |
| 4  | <b>486.2558</b>  | 243.6316       | 469.2293        | 235.1183        | <b>468.2453</b>  | 234.6263        | T    | <b>1190.6801</b> | <b>595.8437</b> | 1173.6535      | 587.3304        | 1172.6695       | 586.8384        | 10 |
| 5  | 583.3086         | 292.1579       | 566.2821        | 283.6447        | 565.2980         | 283.1527        | P    | <b>1089.6324</b> | <b>545.3198</b> | 1072.6058      | 536.8066        | 1071.6218       | 536.3146        | 9  |
| 6  | <b>730.3770</b>  | 365.6921       | <b>713.3505</b> | 357.1789        | <b>712.3665</b>  | 356.6869        | F    | <b>992.5796</b>  | 496.7935        | 975.5531       | 488.2802        | 974.5691        | 487.7882        | 8  |
| 7  | 827.4298         | 414.2185       | 810.4032        | 405.7053        | 809.4192         | 405.2132        | P    | <b>845.5112</b>  | 423.2592        | 828.4847       | 414.7460        | 827.5006        | 414.2540        | 7  |
| 8  | <b>914.4618</b>  | 457.7345       | 897.4353        | 449.2213        | 896.4512         | 448.7293        | S    | 748.4584         | 374.7329        | 731.4319       | 366.2196        | <b>730.4479</b> | 365.7276        | 6  |
| 9  | 1027.5459        | 514.2766       | 1010.5493       | 505.7633        | <b>1009.5353</b> | 505.2713        | L    | 661.4264         | 331.2168        | 644.3999       | 322.7036        |                 |                 | 5  |
| 10 | <b>1229.7049</b> | 615.3561       | 1212.6783       | 606.8428        | <b>1211.6943</b> | 606.3508        | K    | <b>548.3424</b>  | 274.6748        | 531.3158       | 266.1615        |                 |                 | 4  |
| 11 | 1286.7264        | 643.8668       | 1269.6998       | 635.3535        | 1268.7158        | 634.8615        | G    | <b>346.1833</b>  | 173.5953        | 329.1568       | 165.0820        |                 |                 | 3  |
| 12 | <b>1400.7693</b> | 700.8883       | 1383.7427       | 692.3750        | 1382.7587        | 691.8830        | N    | 289.1619         | 145.0846        | 272.1353       | 136.5713        |                 |                 | 2  |
| 13 |                  |                |                 |                 |                  |                 | R    | 175.1190         | 88.0631         | 158.0924       | 79.5498         |                 |                 | 1  |

Match to Query 5103: 1206.723368 from(604.368960,2+) intensity(61857.8594)

Title: File1338 Spectrum13208 scans: 14127

Data file I:\2013-9-14-A549-Prometh-Fr2-ZW.mgf

Click mouse within plot area to zoom in by factor of two about that point

Or,   to  Da

Label all possible matches  Label matches used for scoring

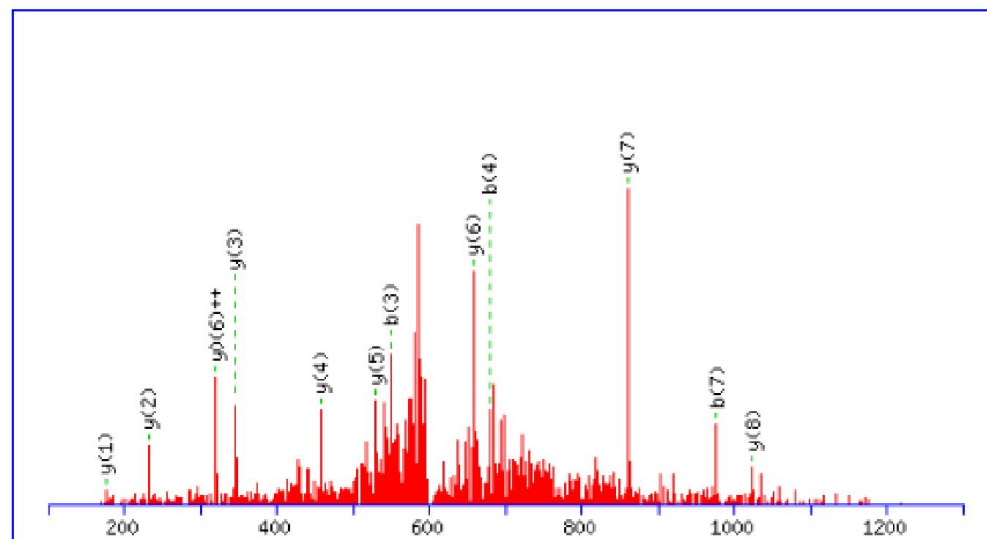

Monoisotopic mass of neutral peptide Mr(calc): 1206.7245

Fixed modifications: Carbamidomethyl (C) (apply to specified residues or termini only)

Variable modifications:

K1 : Propionyl (K)

K3 : Propionyl-(13CD3)Methyl (K)

Ions Score: 58 Expect: 0.00039

Matches : 12/80 fragment ions using 22 most intense peaks

| # | b               | b <sup>++</sup> | b <sup>*</sup> | b <sup>+++</sup> | b <sup>0</sup> | b <sup>0++</sup> | Seq. | y                | y <sup>++</sup> | y <sup>*</sup> | y <sup>+++</sup> | y <sup>0</sup> | y <sup>0++</sup> | # |
|---|-----------------|-----------------|----------------|------------------|----------------|------------------|------|------------------|-----------------|----------------|------------------|----------------|------------------|---|
| 1 | 185.1285        | 93.0679         | 168.1019       | 84.5546          |                |                  | K    |                  |                 |                |                  |                |                  | 9 |
| 2 | 348.1918        | 174.5995        | 331.1652       | 166.0863         |                |                  | Y    | <b>1023.6106</b> | 512.3089        | 1006.5840      | 503.7957         | 1005.6000      | 503.3037         | 8 |
| 3 | <b>550.3508</b> | 275.6790        | 533.3242       | 267.1658         |                |                  | K    | <b>860.5473</b>  | 430.7773        | 843.5207       | 422.2640         | 842.5367       | 421.7720         | 7 |
| 4 | <b>679.3934</b> | 340.2003        | 662.3668       | 331.6871         | 661.3828       | 331.1951         | E    | <b>658.3883</b>  | 329.6978        | 641.3617       | 321.1845         | 640.3777       | <b>320.6925</b>  | 6 |
| 5 | 750.4305        | 375.7189        | 733.4040       | 367.2056         | 732.4199       | 366.7136         | A    | <b>529.3457</b>  | 265.1765        | 512.3191       | 256.6632         |                |                  | 5 |
| 6 | 863.5146        | 432.2609        | 846.4880       | 423.7476         | 845.5040       | 423.2556         | L    | <b>458.3085</b>  | 229.6579        | 441.2820       | 221.1446         |                |                  | 4 |
| 7 | <b>976.5986</b> | 488.8030        | 959.5721       | 480.2897         | 958.5881       | 479.7977         | L    | <b>345.2245</b>  | 173.1159        | 328.1979       | 164.6026         |                |                  | 3 |
| 8 | 1033.6201       | 517.3137        | 1016.5935      | 508.8004         | 1015.6095      | 508.3084         | G    | <b>232.1404</b>  | 116.5738        | 215.1139       | 108.0606         |                |                  | 2 |
| 9 |                 |                 |                |                  |                |                  | R    | <b>175.1190</b>  | 88.0631         | 158.0924       | 79.5498          |                |                  | 1 |

Match to Query 2674: 1126.636088 from(564.325320,2+) intensity(80633.6953)

Title: File1365 Spectrum12136 scans: 12888

Data file J:\2013-9-14-A549-Prometh-Fr17-ZW.mgf

Click mouse within plot area to zoom in by factor of two about that point

Or,  150 to 1100 Da Label all possible matches  Label matches used for scoring 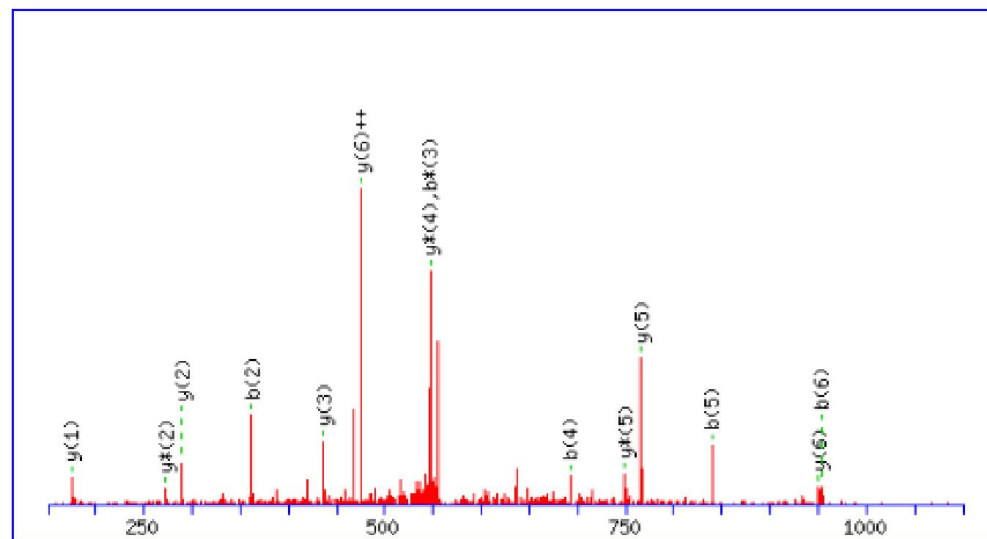

Monoisotopic mass of neutral peptide Mr(calc): 1126.6350

Fixed modifications: Carbamidomethyl (C) (apply to specified residues or termini only)

Variable modifications:

N-term : Acetyl (Protein N-term)

M1 : Label:13C(1)2H(3) (M)

K2 : Propionyl (K)

K3 : Propionyl-(13CD3)Methyl (K)

Ions Score: 29 Expect: 0.43

Matches : 14/46 fragment ions using 20 most intense peaks ([help](#))

| # | b               | b <sup>++</sup> | b <sup>*</sup>  | b <sup>+++</sup> | Seq. | y               | y <sup>++</sup> | y <sup>*</sup>  | y <sup>+++</sup> | # |
|---|-----------------|-----------------|-----------------|------------------|------|-----------------|-----------------|-----------------|------------------|---|
| 1 | 178.0805        | 89.5439         |                 |                  | M    |                 |                 |                 |                  | 7 |
| 2 | <b>362.2017</b> | 181.6045        | 345.1751        | 173.0912         | K    | <b>950.5691</b> | <b>475.7882</b> | 933.5425        | 467.2749         | 6 |
| 3 | 564.3607        | 282.6840        | <b>547.3342</b> | 274.1707         | K    | <b>766.4479</b> | 383.7276        | <b>749.4213</b> | 375.2143         | 5 |
| 4 | <b>692.4193</b> | 346.7133        | 675.3927        | 338.2000         | Q    | 564.2889        | 282.6481        | <b>547.2623</b> | 274.1348         | 4 |
| 5 | <b>839.4877</b> | 420.2475        | 822.4611        | 411.7342         | F    | <b>436.2303</b> | 218.6188        | 419.2037        | 210.1055         | 3 |
| 6 | <b>953.5306</b> | 477.2689        | 936.5041        | 468.7557         | N    | <b>289.1619</b> | 145.0846        | <b>272.1353</b> | 136.5713         | 2 |
| 7 |                 |                 |                 |                  | R    | <b>175.1190</b> | 88.0631         | 158.0924        | 79.5498          | 1 |

# MS/MS Fragmentation of **KRPYEENR**

Found in **M0QYI8**, Heterogeneous nuclear ribonucleoprotein U-like protein 1 (Fragment) OS=Homo sapiens GN=HNRNPUL1 PE=4 SV=1

Match to Query 2935: 1164.618042 from(389.213290,3+) intensity(27002.0938)

Title: File1365 Spectrum3202 scans: 3557

Data file J:\2013-9-14-A549-Prometh-Fr17-ZW.mgf

Click mouse within plot area to zoom in by factor of two about that point

Or,  100 to 1200 Da

Label all possible matches  Label matches used for scoring

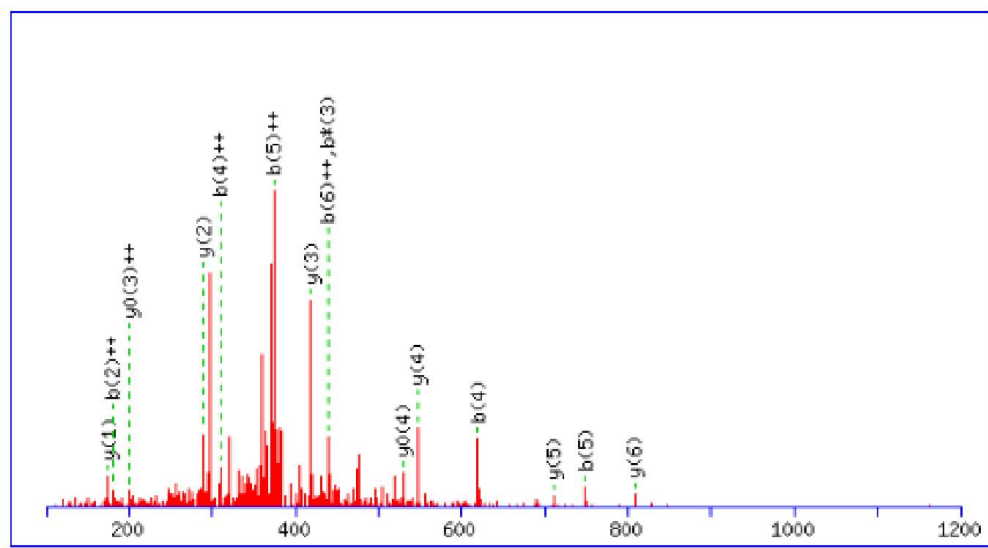

Monoisotopic mass of neutral peptide Mr(calc): 1164.6160

Fixed modifications: Carbamidomethyl (C) (apply to specified residues or termini only)

Variable modifications:

K1 : Propionyl-(13CD3)Methyl (K)

Ions Score: 35 Expect: 0.11

Matches : 15/72 fragment ions using 24 most intense peaks ([help](#))

| # | b               | b <sup>++</sup> | b <sup>+</sup>  | b <sup>+++</sup> | b <sup>0</sup> | b <sup>0++</sup> | Seq. | y               | y <sup>++</sup> | y <sup>+</sup> | y <sup>+++</sup> | y <sup>0</sup>  | y <sup>0++</sup> | # |
|---|-----------------|-----------------|-----------------|------------------|----------------|------------------|------|-----------------|-----------------|----------------|------------------|-----------------|------------------|---|
| 1 | 203.1663        | 102.0868        | 186.1397        | 93.5735          |                |                  | K    |                 |                 |                |                  |                 |                  | 8 |
| 2 | 359.2674        | <b>180.1373</b> | 342.2409        | 171.6241         |                |                  | R    | 963.4643        | 482.2358        | 946.4377       | 473.7225         | 945.4537        | 473.2305         | 7 |
| 3 | 456.3202        | 228.6637        | <b>439.2936</b> | 220.1504         |                |                  | P    | <b>807.3632</b> | 404.1852        | 790.3366       | 395.6719         | 789.3526        | 395.1799         | 6 |
| 4 | <b>619.3835</b> | <b>310.1954</b> | 602.3569        | 301.6821         |                |                  | Y    | <b>710.3104</b> | 355.6588        | 693.2838       | 347.1456         | 692.2998        | 346.6536         | 5 |
| 5 | <b>748.4261</b> | <b>374.7167</b> | 731.3995        | 366.2034         | 730.4155       | 365.7114         | E    | <b>547.2471</b> | 274.1272        | 530.2205       | 265.6139         | <b>529.2365</b> | 265.1219         | 4 |
| 6 | 877.4687        | <b>439.2380</b> | 860.4421        | 430.7247         | 859.4581       | 430.2327         | E    | <b>418.2045</b> | 209.6059        | 401.1779       | 201.0926         | 400.1939        | <b>200.6006</b>  | 3 |
| 7 | 991.5116        | 496.2594        | 974.4851        | 487.7462         | 973.5010       | 487.2542         | N    | <b>289.1619</b> | 145.0846        | 272.1353       | 136.5713         |                 |                  | 2 |
| 8 |                 |                 |                 |                  |                |                  | R    | <b>175.1190</b> | 88.0631         | 158.0924       | 79.5498          |                 |                  | 1 |



Match to Query 14519: 2550.190572 from(851.070800,3+) intensity(26727.1250)

Title: File1365 Spectrum17380 scans: 18356

Data file J:\2013-9-14-A549-Prometh-Fr17-ZW.mgf

Click mouse within plot area to zoom in by factor of two about that point

Or,  200 to  Da Label all possible matches  Label matches used for scoring 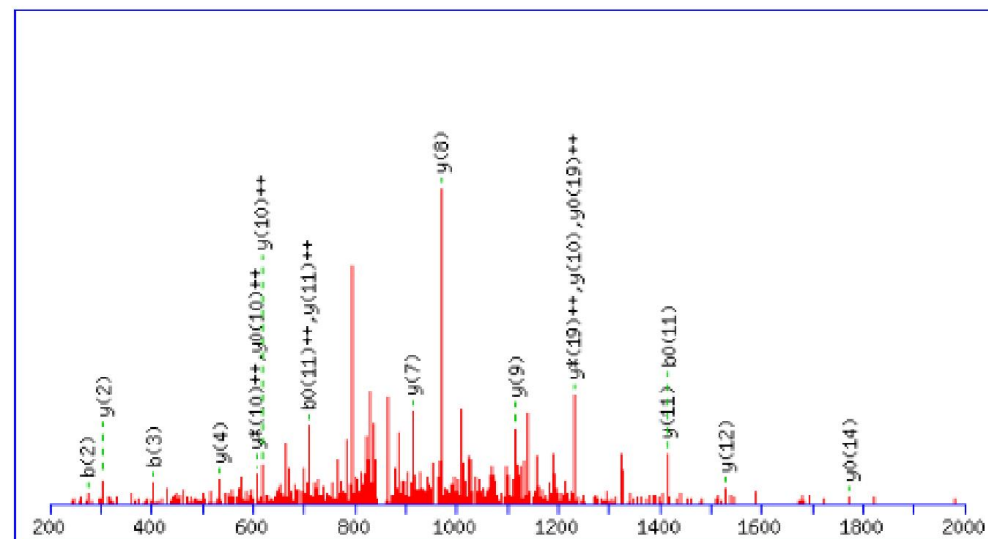

Monoisotopic mass of neutral peptide Mr(calc): 2550.2130

Fixed modifications: Carbamidomethyl (C) (apply to specified residues or termini only)

Variable modifications:

K2 : Propionyl-(13CD3)Methyl (K)

K10 : Propionyl (K)

M16 : Label:13C(1)2H(3) (M)

Ions Score: 30 Expect: 0.28

Matches : 19/220 fragment ions using 33 most intense peaks ([help](#))

| #  | b               | b <sup>++</sup> | b <sup>+</sup> | b <sup>+++</sup> | b <sup>0</sup>   | b <sup>0++</sup> | Seq. | y                | y <sup>++</sup> | y <sup>+</sup> | y <sup>+++</sup> | y <sup>0</sup>   | y <sup>0++</sup> | #  |
|----|-----------------|-----------------|----------------|------------------|------------------|------------------|------|------------------|-----------------|----------------|------------------|------------------|------------------|----|
| 1  | 72.0444         | 36.5258         |                |                  |                  |                  | A    |                  |                 |                |                  |                  |                  | 20 |
| 2  | <b>274.2034</b> | 137.6053        | 257.1769       | 129.0921         |                  |                  | K    | 2480.1831        | 1240.5952       | 2463.1566      | <b>1232.0819</b> | 2462.1726        | <b>1231.5899</b> | 19 |
| 3  | <b>403.2460</b> | 202.1266        | 386.2194       | 193.6134         | 385.2354         | 193.1214         | E    | 2278.0241        | 1139.5157       | 2260.9976      | 1131.0024        | 2260.0136        | 1130.5104        | 18 |
| 4  | 550.3144        | 275.6608        | 533.2879       | 267.1476         | 532.3038         | 266.6556         | F    | 2148.9815        | 1074.9944       | 2131.9550      | 1066.4811        | 2130.9710        | 1065.9891        | 17 |
| 5  | 647.3672        | 324.1872        | 630.3406       | 315.6740         | 629.3566         | 315.1819         | P    | 2001.9131        | 1001.4602       | 1984.8866      | 992.9469         | 1983.9026        | 992.4540         | 16 |
| 6  | 761.4101        | 381.2087        | 744.3836       | 372.6954         | 743.3995         | 372.2034         | N    | 1904.8604        | 952.9338        | 1887.8338      | 944.4205         | 1886.8498        | 943.9285         | 15 |
| 7  | 860.4785        | 430.7429        | 843.4520       | 422.2296         | 842.4679         | 421.7376         | Y    | 1790.8174        | 895.9124        | 1773.7909      | 887.3991         | <b>1772.8069</b> | 886.9071         | 14 |
| 8  | 1023.5418       | 512.2746        | 1006.5153      | 503.7613         | 1005.5313        | 503.2693         | Y    | 1691.7490        | 846.3781        | 1674.7225      | 837.8649         | 1673.7384        | 837.3729         | 13 |
| 9  | 1136.6259       | 568.8166        | 1119.5994      | 560.3033         | 1118.6133        | 559.8113         | I    | <b>1528.6857</b> | 764.8465        | 1511.6591      | 756.3332         | 1510.6751        | 755.8412         | 12 |
| 10 | 1320.7471       | 660.8772        | 1303.7205      | 652.3639         | 1302.7365        | 651.8719         | K    | <b>1415.6016</b> | <b>708.3044</b> | 1398.5751      | 699.7912         | 1397.5911        | 699.2992         | 11 |
| 11 | 1434.7900       | 717.8986        | 1417.7635      | 709.3854         | <b>1416.7794</b> | <b>708.8934</b>  | N    | <b>1231.4804</b> | <b>616.2439</b> | 1214.4539      | <b>607.7306</b>  | 1213.4699        | <b>607.2386</b>  | 10 |
| 12 | 1581.8534       | 791.4329        | 1564.8319      | 782.9196         | 1563.8479        | 782.4276         | F    | <b>1117.4375</b> | 559.2224        | 1100.4110      | 550.7091         | 1099.4269        | 550.2171         | 9  |
| 13 | 1638.8799       | 819.9436        | 1621.8533      | 811.4303         | 1620.8693        | 810.9383         | G    | <b>970.3691</b>  | 485.6882        | 953.3426       | 477.1749         | 952.3585         | 476.6829         | 8  |
| 14 | 1767.9225       | 884.4649        | 1750.8959      | 875.9516         | 1749.9119        | 875.4596         | F    | <b>913.3476</b>  | 457.1775        | 896.3211       | 448.6642         | 895.3371         | 448.1722         | 7  |
| 15 | 1882.9494       | 941.9784        | 1865.9229      | 933.4651         | 1864.9389        | 932.9731         | D    | 784.3050         | 392.6562        | 767.2785       | 384.1429         | 766.2945         | 383.6509         | 6  |
| 16 | 2018.0121       | 1009.5097       | 2000.9855      | 1000.9964        | 2000.0015        | 1000.5044        | M    | 669.2781         | 335.1427        | 652.2516       | 326.6294         | 651.2675         | 326.1374         | 5  |
| 17 | 2133.0390       | 1067.0232       | 2116.0125      | 1058.5099        | 2115.0285        | 1058.0179        | D    | <b>534.2154</b>  | 267.6114        | 517.1889       | 259.0981         | 516.2049         | 258.6061         | 4  |
| 18 | 2248.0660       | 1124.5366       | 2231.0394      | 1116.0234        | 2230.0554        | 1115.5313        | D    | 419.1885         | 210.0979        | 402.1619       | 201.5846         | 401.1779         | 201.0926         | 3  |
| 19 | 2377.1086       | 1189.0579       | 2360.0820      | 1180.5447        | 2359.0980        | 1180.0526        | F    | <b>304.1615</b>  | 152.5844        | 287.1350       | 144.0711         | 286.1510         | 143.5791         | 2  |
| 20 |                 |                 |                |                  |                  |                  | R    | 175.1190         | 88.0631         | 158.0924       | 79.5498          |                  |                  | 1  |

Match to Query 3298: 1217.689068 from(609.851810,2+) intensity(313489.9063)

Title: File1365 Spectrum6004 scans: 6491

Data file J:\2013-9-14-A549-Prometh-Fr17-ZW.mgf

Click mouse within plot area to zoom in by factor of two about that point

Or,  150 to 1100 Da Label all possible matches  Label matches used for scoring 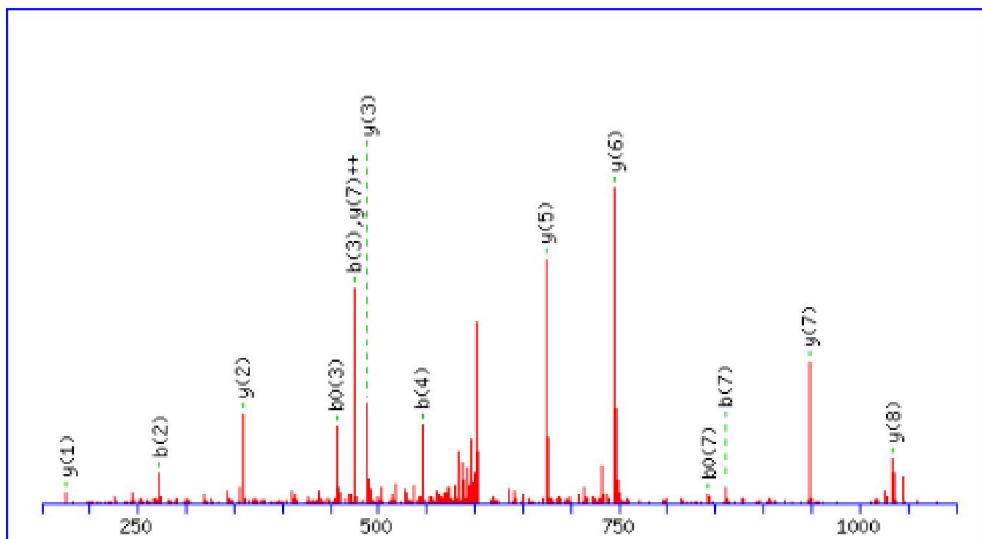

Monoisotopic mass of neutral peptide Mr(calc): 1217.6888

Fixed modifications: Carbamidomethyl (C) (apply to specified residues or termini only)

Variable modifications:

K1 : Propionyl (K)

K3 : Propionyl-(13CD3)Methyl (K)

K8 : Propionyl (K)

Ions Score: 57 Expect: 0.00072

Matches : 14/90 fragment ions using 19 most intense peaks ([help](#))

| # | b         | b <sup>++</sup> | b <sup>+</sup> | b <sup>+++</sup> | b <sup>0</sup> | b <sup>0++</sup> | Seq. | y         | y <sup>++</sup> | y <sup>+</sup> | y <sup>+++</sup> | y <sup>0</sup> | y <sup>0++</sup> | # |
|---|-----------|-----------------|----------------|------------------|----------------|------------------|------|-----------|-----------------|----------------|------------------|----------------|------------------|---|
| 1 | 185.1285  | 93.0679         | 168.1669       | 84.5546          |                |                  | K    |           |                 |                |                  |                |                  | 9 |
| 2 | 272.1605  | 136.5839        | 255.1339       | 128.0706         | 254.1499       | 127.5786         | S    | 1034.5749 | 517.7911        | 1017.5484      | 509.2778         | 1016.5644      | 508.7858         | 8 |
| 3 | 474.3195  | 237.6634        | 457.2929       | 229.1501         | 456.3089       | 228.6581         | K    | 947.5429  | 474.2751        | 930.5164       | 465.7618         | 929.5323       | 465.2698         | 7 |
| 4 | 545.3566  | 273.1819        | 528.3301       | 264.6687         | 527.3460       | 264.1767         | A    | 745.3839  | 373.1956        | 728.3573       | 364.6823         | 727.3733       | 364.1903         | 6 |
| 5 | 616.3937  | 308.7005        | 599.3672       | 300.1872         | 598.3832       | 299.6952         | A    | 674.3468  | 337.6770        | 657.3202       | 329.1638         | 656.3362       | 328.6717         | 5 |
| 6 | 731.4207  | 366.2140        | 714.3941       | 357.7007         | 713.4101       | 357.2087         | D    | 603.3097  | 302.1585        | 586.2831       | 293.6452         | 585.2991       | 293.1532         | 4 |
| 7 | 860.4633  | 430.7353        | 843.4367       | 422.2220         | 842.4527       | 421.7300         | E    | 488.2827  | 244.6450        | 471.2562       | 236.1317         | 470.2722       | 235.6397         | 3 |
| 8 | 1044.5844 | 522.7959        | 1027.5579      | 514.2826         | 1026.5739      | 513.7906         | K    | 359.2401  | 180.1237        | 342.2136       | 171.6104         |                |                  | 2 |
| 9 |           |                 |                |                  |                |                  | R    | 175.1190  | 88.0631         | 158.0924       | 79.5498          |                |                  | 1 |

MS/MS Fragmentation of **KIGGHGPTLKAYQEGR**Found in **B7Z904**, Thioredoxin reductase 1 OS=Homo sapiens GN=TXNRD1 PE=2 SV=1

Match to Query 8579: 1841.006448 from(921.510500,2+) intensity(286420.9688)

Title: File1365 Spectrum9571 scans: 10216

Data file J:\2013-9-14-A549-Prometh-Fr17-ZW.mgf

Click mouse within plot area to zoom in by factor of two about that point

Or,  200  1700  Label all possible matches  Label matches used for scoring 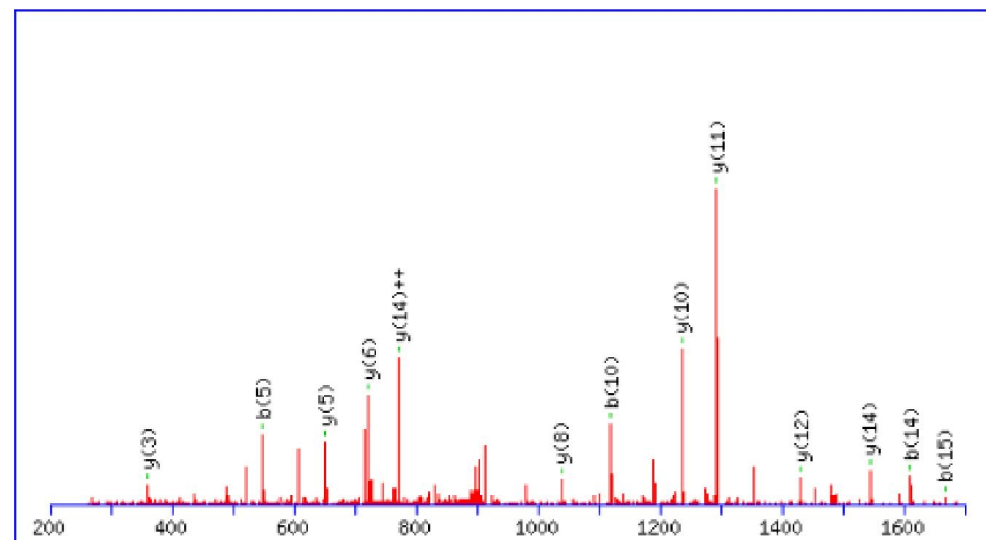

Monoisotopic mass of neutral peptide Mr(calc): 1841.0068

Fixed modifications: Carbamidomethyl (C) (apply to specified residues or termini only)

Variable modifications:

K1 : Propionyl (K)

K10 : Propionyl-(13CD3)Methyl (K)

Ions Score: 68 Expect: 9.4e-005

Matches : 13/162 fragment ions using 15 most intense peaks ([help](#))

| #  | b                | b <sup>+</sup> | b <sup>+</sup> | b <sup>++</sup> | b <sup>0</sup> | b <sup>0++</sup> | Seq. | y                | y <sup>+</sup>  | y <sup>+</sup> | y <sup>++</sup> | y <sup>0</sup> | y <sup>0++</sup> | #  |
|----|------------------|----------------|----------------|-----------------|----------------|------------------|------|------------------|-----------------|----------------|-----------------|----------------|------------------|----|
| 1  | 185.1285         | 93.0679        | 168.1019       | 84.5546         |                |                  | K    |                  |                 |                |                 |                |                  | 16 |
| 2  | 298.2125         | 149.6099       | 281.1860       | 141.0966        |                |                  | I    | 1657.8929        | 829.4501        | 1640.8664      | 820.9368        | 1639.8824      | 820.4448         | 15 |
| 3  | 355.2340         | 178.1206       | 338.2074       | 169.6074        |                |                  | G    | <b>1544.8089</b> | <b>772.9081</b> | 1527.7823      | 764.3948        | 1526.7983      | 763.9028         | 14 |
| 4  | 412.2554         | 206.6314       | 395.2289       | 198.1181        |                |                  | G    | 1487.7874        | 744.3973        | 1470.7608      | 735.8841        | 1469.7768      | 735.3921         | 13 |
| 5  | <b>549.3144</b>  | 275.1608       | 532.2878       | 266.6475        |                |                  | H    | <b>1430.7659</b> | 715.8866        | 1413.7394      | 707.3733        | 1412.7554      | 706.8813         | 12 |
| 6  | 606.3358         | 303.6715       | 589.3093       | 295.1583        |                |                  | G    | <b>1293.7070</b> | 647.3571        | 1276.6805      | 638.8439        | 1275.6964      | 638.3519         | 11 |
| 7  | 703.3886         | 352.1979       | 686.3620       | 343.6847        |                |                  | P    | <b>1236.6856</b> | 618.8464        | 1219.6590      | 610.3331        | 1218.6750      | 609.8411         | 10 |
| 8  | 804.4363         | 402.7218       | 787.4097       | 394.2085        | 786.4257       | 393.7165         | T    | 1139.6328        | 570.3200        | 1122.6062      | 561.8068        | 1121.6222      | 561.3147         | 9  |
| 9  | 917.5203         | 459.2638       | 900.4938       | 450.7505        | 899.5098       | 450.2585         | L    | <b>1038.5851</b> | 519.7962        | 1021.5586      | 511.2829        | 1020.5745      | 510.7909         | 8  |
| 10 | <b>1119.6793</b> | 560.3433       | 1102.6528      | 551.8300        | 1101.6688      | 551.3380         | K    | 925.5010         | 463.2542        | 908.4745       | 454.7409        | 907.4905       | 454.2489         | 7  |
| 11 | 1190.7165        | 595.8619       | 1173.6899      | 587.3486        | 1172.7059      | 586.8566         | A    | <b>723.3420</b>  | 362.1747        | 706.3155       | 353.6614        | 705.3315       | 353.1694         | 6  |
| 12 | 1353.7798        | 677.3935       | 1336.7532      | 668.8803        | 1335.7692      | 668.3882         | Y    | <b>652.3049</b>  | 326.6561        | 635.2784       | 318.1428        | 634.2944       | 317.6508         | 5  |
| 13 | 1481.8384        | 741.4228       | 1464.8118      | 732.9095        | 1463.8278      | 732.4175         | Q    | 489.2416         | 245.1244        | 472.2150       | 236.6112        | 471.2310       | 236.1191         | 4  |
| 14 | <b>1610.8810</b> | 805.9441       | 1593.8544      | 797.4308        | 1592.8704      | 796.9388         | E    | <b>361.1830</b>  | 181.0951        | 344.1565       | 172.5819        | 343.1724       | 172.0899         | 3  |
| 15 | <b>1667.9024</b> | 834.4548       | 1650.8759      | 825.9416        | 1649.8919      | 825.4496         | G    | 232.1404         | 116.5738        | 215.1139       | 108.0006        |                |                  | 2  |
| 16 |                  |                |                |                 |                |                  | R    | 175.1190         | 88.0631         | 158.0924       | 79.5498         |                |                  | 1  |

Match to Query 3472: 1076.625088 from(539.319820,2+) intensity(146545.1875)

Title: File1347 Spectrum9994 scans: 11017

Data file J:\2013-9-14-A549-Prometh-Fr15-ZW.mgf

Click mouse within plot area to zoom in by factor of two about that point

Or,   to  Da Label all possible matches  Label matches used for scoring 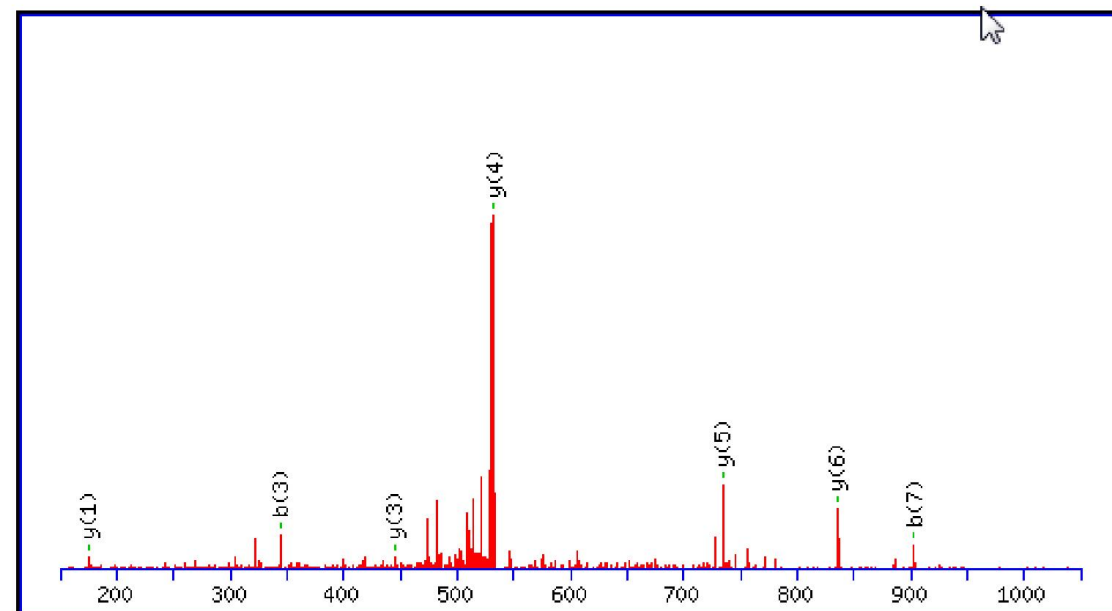**Monoisotopic mass of neutral peptide Mr(calc):** 1076.6323**Fixed modifications:** Carbamidomethyl (C) (apply to specified residues or termini only)**Variable modifications:****K4** : Propionyl-(13CD3)Methyl (K)**Ions Score:** 39 **Expect:** 0.047**Matches** : 7/74 fragment ions using 9 most intense peaks

| # | b               | b <sup>++</sup> | b <sup>*</sup> | b <sup>+++</sup> | b <sup>0</sup> | b <sup>0++</sup> | Seq. | y               | y <sup>++</sup> | y <sup>*</sup> | y <sup>+++</sup> | y <sup>0</sup> | y <sup>0++</sup> | # |
|---|-----------------|-----------------|----------------|------------------|----------------|------------------|------|-----------------|-----------------|----------------|------------------|----------------|------------------|---|
| 1 | 129.1022        | 65.0548         | 112.0757       | 56.5415          |                |                  | K    |                 |                 |                |                  |                |                  | 8 |
| 2 | 243.1452        | 122.0762        | 226.1186       | 113.5629         |                |                  | N    | 949.5446        | 475.2760        | 932.5181       | 466.7627         | 931.5341       | 466.2707         | 7 |
| 3 | <b>344.1928</b> | 172.6001        | 327.1663       | 164.0868         | 326.1823       | 163.5948         | T    | <b>835.5017</b> | 418.2545        | 818.4752       | 409.7412         | 817.4911       | 409.2492         | 6 |
| 4 | 546.3519        | 273.6796        | 529.3253       | 261.1663         | 528.3413       | 264.6743         | K    | <b>734.4540</b> | 367.7307        | 717.4275       | 359.2174         | 716.4435       | 358.7254         | 5 |
| 5 | 633.3839        | 317.1956        | 616.3573       | 308.6823         | 615.3733       | 308.1903         | S    | <b>532.2950</b> | 266.6511        | 515.2685       | 258.1379         | 514.2845       | 257.6459         | 4 |
| 6 | 789.4850        | 395.2461        | 772.4584       | 386.7329         | 771.4744       | 386.2409         | R    | <b>445.2630</b> | 223.1351        | 428.2364       | 214.6219         |                |                  | 3 |
| 7 | <b>903.5279</b> | 452.2676        | 886.5014       | 443.7543         | 885.5174       | 443.2623         | N    | 289.1619        | 145.0846        | 272.1353       | 136.5713         |                |                  | 2 |
| 8 |                 |                 |                |                  |                |                  | R    | <b>175.1190</b> | 88.0631         | 158.0924       | 79.5498          |                |                  | 1 |

Match to Query 315: 761.430888 from(381.722720,2+) intensity(179082.3906)

Title: File1347 Spectrum2919 scans: 3548

Data file J:\2013-9-14-A549-Prometh-Fr15-ZW.mgf

Click mouse within plot area to zoom in by factor of two about that point

Or,   to  Da Label all possible matches  Label matches used for scoring 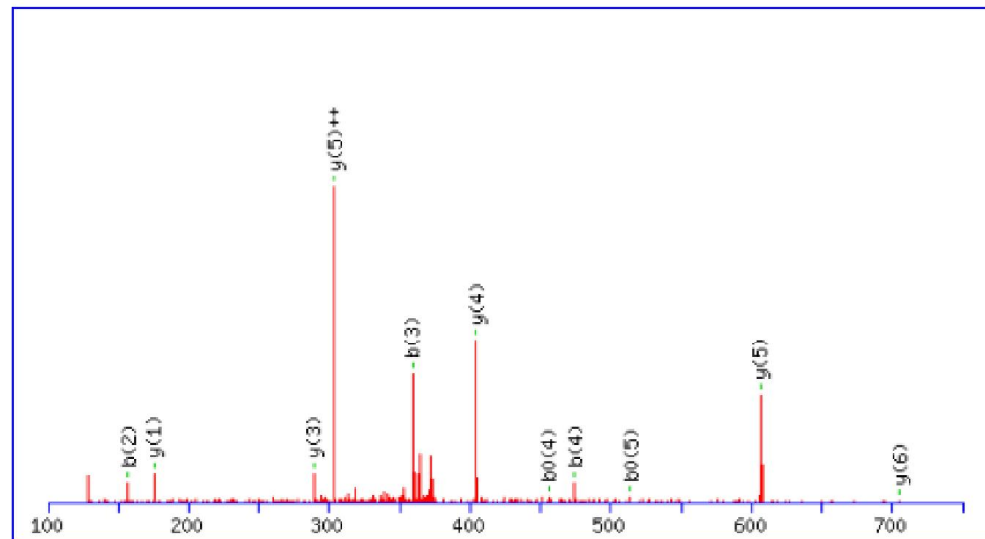

Monoisotopic mass of neutral peptide Mr(calc): 761.4304

Fixed modifications: Carbamidomethyl (C) (apply to specified residues or termini only)

Variable modifications:

K3 : Propionyl-(13CD3)Methyl (K)

Ions Score: 38 Expect: 0.042

Matches : 11/56 fragment ions using 18 most intense peaks ([help](#))

| # | b               | b <sup>++</sup> | b <sup>+</sup> | b <sup>+++</sup> | b <sup>0</sup>  | b <sup>0++</sup> | Seq. | y               | y <sup>++</sup> | y <sup>+</sup> | y <sup>+++</sup> | y <sup>0</sup> | y <sup>0++</sup> | # |
|---|-----------------|-----------------|----------------|------------------|-----------------|------------------|------|-----------------|-----------------|----------------|------------------|----------------|------------------|---|
| 1 | 58.0287         | 29.5180         |                |                  |                 |                  | G    |                 |                 |                |                  |                |                  | 7 |
| 2 | <b>157.0972</b> | 79.0522         |                |                  |                 |                  | V    | <b>705.4163</b> | 353.2118        | 688.3897       | 344.6985         | 687.4057       | 344.2065         | 6 |
| 3 | <b>359.2562</b> | 180.1317        | 342.2296       | 171.6184         |                 |                  | K    | <b>606.3478</b> | <b>303.6776</b> | 589.3213       | 295.1643         | 588.3373       | 294.6723         | 5 |
| 4 | <b>474.2831</b> | 237.6452        | 457.2566       | 229.1319         | <b>456.2725</b> | 228.6399         | D    | <b>404.1888</b> | 202.5980        | 387.1623       | 194.0848         | 386.1783       | 193.5928         | 4 |
| 5 | 531.3046        | 266.1559        | 514.2780       | 257.6427         | <b>513.2940</b> | 257.1506         | G    | <b>289.1619</b> | 145.0846        | 272.1353       | 136.5713         |                |                  | 3 |
| 6 | 588.3260        | 294.6667        | 571.2995       | 286.1534         | 570.3155        | 285.6614         | G    | 232.1404        | 116.5738        | 215.1139       | 108.0606         |                |                  | 2 |
| 7 |                 |                 |                |                  |                 |                  | R    | <b>175.1190</b> | 88.0631         | 158.0924       | 79.5498          |                |                  | 1 |

Match to Query 964: 849.483668 from(425.749110,2+) intensity(107069.8672)

Title: File1347 Spectrum2699 scans: 3311

Data file J:\2013-9-14-A549-Prometh-Fr15-ZW.mgf

Click mouse within plot area to zoom in by factor of two about that point

Or,  100 to 850 Da Label all possible matches  Label matches used for scoring 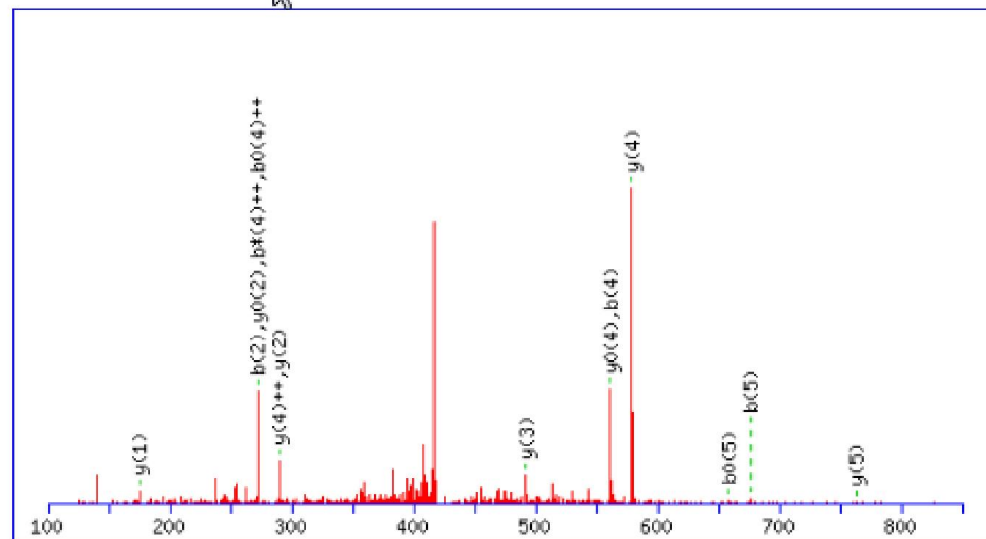

Monoisotopic mass of neutral peptide Mr(calc): 849.4828

Fixed modifications: Carbamidomethyl (C) (apply to specified residues or termini only)

Variable modifications:

K2 : Propionyl (K)

K4 : Propionyl-(13CD3)Methyl (K)

Ions Score: 41 Expect: 0.026

Matches : 14/56 fragment ions using 15 most intense peaks

| # | b               | b <sup>++</sup> | b <sup>*</sup> | b <sup>+++</sup> | b <sup>0</sup>  | b <sup>0++</sup> | Seq. | y               | y <sup>++</sup> | y <sup>*</sup> | y <sup>+++</sup> | y <sup>0</sup>  | y <sup>0++</sup> | # |
|---|-----------------|-----------------|----------------|------------------|-----------------|------------------|------|-----------------|-----------------|----------------|------------------|-----------------|------------------|---|
| 1 | 88.0393         | 44.5233         |                |                  | 70.0287         | 35.5180          | S    |                 |                 |                |                  |                 |                  | 6 |
| 2 | <b>272.1605</b> | 136.5839        | 255.1339       | 128.0706         | 254.1499        | 127.5786         | K    | <b>763.4581</b> | 382.2327        | 746.4316       | 373.7194         | 745.4475        | 373.2274         | 5 |
| 3 | 359.1925        | 180.0999        | 342.1660       | 171.5866         | 341.1819        | 171.0946         | S    | <b>579.3369</b> | <b>290.1721</b> | 562.3104       | 281.6588         | <b>561.3264</b> | 281.1668         | 4 |
| 4 | <b>561.3515</b> | 281.1794        | 544.3250       | <b>272.6661</b>  | 543.3410        | <b>272.1741</b>  | K    | <b>492.3049</b> | 246.6561        | 475.2784       | 238.1428         | 474.2943        | 237.6508         | 3 |
| 5 | <b>676.3785</b> | 338.6929        | 659.3519       | 330.1796         | <b>658.3679</b> | 329.6876         | D    | <b>290.1459</b> | 145.5766        | 273.1193       | 137.0633         | <b>272.1353</b> | 136.5713         | 2 |
| 6 |                 |                 |                |                  |                 |                  | R    | <b>175.1190</b> | 88.0631         | 158.0924       | 79.5498          |                 |                  | 1 |

Found in **F8W7I9**, Ran GTPase-activating protein 1 OS=Homo sapiens GN=RANGAP1 PE=2 SV=1

Match to Query 4865: 1190.611188 from(596.312870,2+) intensity(644561.5000)

Title: File1341 Spectrum10942 scans: 11836

Data file I:\2013-9-14-A549-Prometh-Fr13-ZW.mgf

Click mouse within plot area to zoom in by factor of two about that point

Or,  100  1200  Label all possible matches  Label matches used for scoring 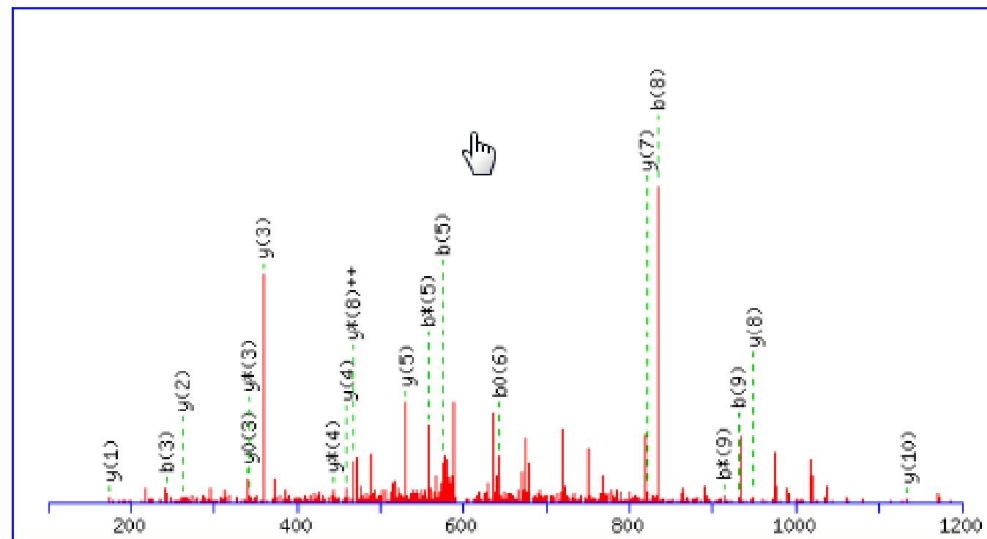

Monoisotopic mass of neutral peptide Mr(calc): 1190.6164

Fixed modifications: Carbamidomethyl (C) (apply to specified residues or termini only)

Variable modifications:

K5 : Propionyl-(13CD3)Methyl (K)

Ions Score: 25 Expect: 0.93

Matches : 19/110 fragment ions using 89 most intense peaks ([help](#))

| #  | b               | b <sup>++</sup> | b <sup>+</sup>  | b <sup>+++</sup> | b <sup>0</sup>  | b <sup>0++</sup> | Seq. | y                | y <sup>++</sup> | y <sup>+</sup>  | y <sup>+++</sup> | y <sup>0</sup>  | y <sup>0++</sup> | #  |
|----|-----------------|-----------------|-----------------|------------------|-----------------|------------------|------|------------------|-----------------|-----------------|------------------|-----------------|------------------|----|
| 1  | 58.0287         | 29.5180         |                 |                  |                 |                  | G    |                  |                 |                 |                  |                 |                  | 11 |
| 2  | 186.0873        | 93.5473         | 169.0608        | 85.0340          |                 |                  | Q    | <b>1134.6022</b> | 567.8047        | 1117.5757       | 559.2915         | 1116.5916       | 558.7995         | 10 |
| 3  | <b>243.1088</b> | 122.0580        | 226.0822        | 113.5448         |                 |                  | G    | 1006.5436        | 503.7755        | 989.5171        | 495.2622         | 988.5331        | 494.7702         | 9  |
| 4  | 372.1514        | 186.5793        | 355.1248        | 178.0661         | 354.1408        | 177.5740         | E    | <b>949.5222</b>  | 475.2647        | 932.4956        | <b>466.7514</b>  | 931.5116        | 466.2594         | 8  |
| 5  | <b>574.3104</b> | 287.6588        | <b>557.2838</b> | 279.1456         | 556.2998        | 278.6535         | K    | <b>820.4796</b>  | 410.7434        | 803.4530        | 402.2302         | 802.4690        | 401.7381         | 7  |
| 6  | 661.3424        | 331.1748        | 644.3159        | 322.6616         | <b>643.3319</b> | 322.1696         | S    | 618.3206         | 309.6639        | 601.2940        | 301.1506         | 600.3100        | 300.6586         | 6  |
| 7  | 732.3795        | 366.6934        | 715.3530        | 358.1801         | 714.3690        | 357.6881         | A    | <b>531.2885</b>  | 266.1479        | 514.2620        | 257.6346         | 513.2780        | 257.1426         | 5  |
| 8  | <b>833.4272</b> | 417.2172        | 816.4007        | 408.7040         | 815.4166        | 408.2120         | T    | <b>460.2514</b>  | 230.6293        | <b>443.2249</b> | 222.1161         | 442.2409        | 221.6241         | 4  |
| 9  | <b>930.4800</b> | 465.7436        | <b>913.4534</b> | 457.2304         | 912.4694        | 456.7383         | P    | <b>359.2037</b>  | 180.1055        | <b>342.1772</b> | 171.5922         | <b>341.1932</b> | 171.1002         | 3  |
| 10 | 1017.5120       | 509.2596        | 1000.4855       | 500.7464         | 999.5014        | 500.2544         | S    | <b>262.1510</b>  | 131.5791        | 245.1244        | 123.0659         | 244.1404        | 122.5738         | 2  |
| 11 |                 |                 |                 |                  |                 |                  | R    | <b>175.1190</b>  | 88.0631         | 158.0924        | 79.5498          |                 |                  | 1  |

Match to Query 2939: 1028.626068 from(515.320310,2+) intensity(19779.6758)

Title: File1341 Spectrum8010 scans: 8781

Data file I:\2013-9-14-A549-Prometh-Fr13-ZW.mgf

Click mouse within plot area to zoom in by factor of two about that point

Or,   to  Da Label all possible matches  Label matches used for scoring 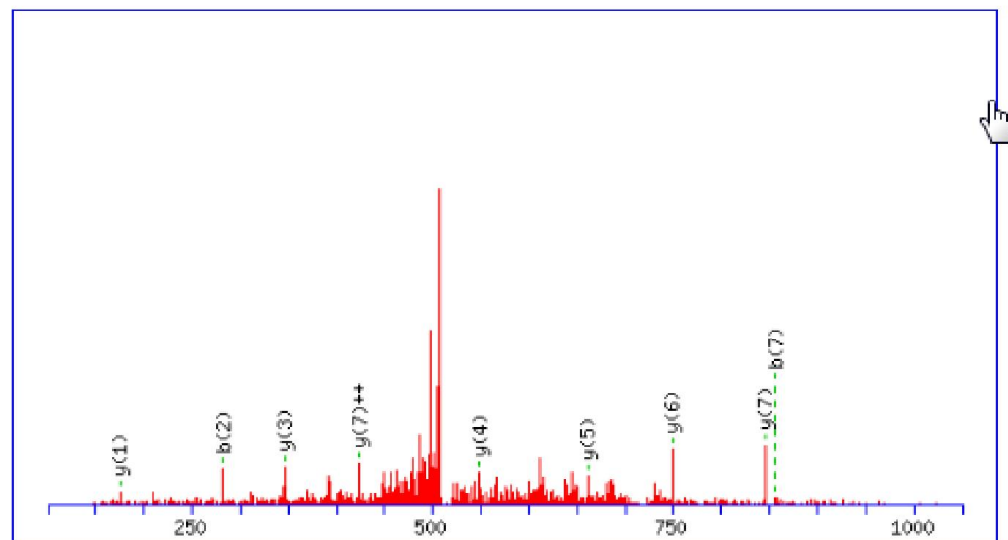

Monoisotopic mass of neutral peptide Mr(calc): 1028.6251

Fixed modifications: Carbamidomethyl (C) (apply to specified residues or termini only)

Variable modifications:

K1 : Propionyl (K)

K5 : Propionyl-(13CD3)Methyl (K)

Ions Score: 38 Expect: 0.039

Matches : 9/70 fragment ions using 18 most intense peaks ([help](#))

| # | b               | b <sup>+</sup> | b <sup>+</sup> | b <sup>++</sup> | b <sup>0</sup> | b <sup>0++</sup> | Seq. | y               | y <sup>++</sup> | y <sup>+</sup> | y <sup>+++</sup> | y <sup>0</sup> | y <sup>0++</sup> | # |
|---|-----------------|----------------|----------------|-----------------|----------------|------------------|------|-----------------|-----------------|----------------|------------------|----------------|------------------|---|
| 1 | 185.1285        | 93.0679        | 168.1019       | 84.5546         |                |                  | K    |                 |                 |                |                  |                |                  | 8 |
| 2 | <b>282.1812</b> | 141.5942       | 265.1547       | 133.0810        |                |                  | P    | <b>845.5112</b> | <b>423.2592</b> | 828.4847       | 414.7460         | 827.5006       | 414.2540         | 7 |
| 3 | 369.2132        | 185.1103       | 352.1867       | 176.5970        | 351.2027       | 176.1050         | S    | <b>748.4584</b> | 374.7329        | 731.4319       | 366.2196         | 730.4479       | 365.7276         | 6 |
| 4 | 482.2973        | 241.6523       | 465.2708       | 233.1390        | 464.2867       | 232.6470         | L    | <b>661.4264</b> | 331.2168        | 644.3999       | 322.7036         |                |                  | 5 |
| 5 | 684.4563        | 342.7318       | 667.4298       | 334.2185        | 666.4458       | 333.7265         | K    | <b>548.3424</b> | 274.6748        | 531.3158       | 266.1615         |                |                  | 4 |
| 6 | 741.4778        | 371.2425       | 724.4512       | 362.7293        | 723.4672       | 362.2372         | G    | <b>346.1833</b> | 173.5953        | 329.1568       | 165.0820         |                |                  | 3 |
| 7 | <b>855.5207</b> | 428.2640       | 838.4942       | 419.7507        | 837.5101       | 419.2587         | N    | 289.1619        | 145.0846        | 272.1353       | 136.5713         |                |                  | 2 |
| 8 |                 |                |                |                 |                |                  | R    | <b>175.1190</b> | 88.0631         | 158.0924       | 79.5498          |                |                  | 1 |



MS/MS Fragmentation of **PKVKR**

Found in **C9JCD9**, Protein BUD31 homolog OS=Homo sapiens GN=BUD31 PE=2 SV=1

Match to Query 781: 812.538788 from(407.276670,2+) intensity(319013.8750)

Title: File1341 Spectrum11041 scans: 11939

Data file I:\2013-9-14-A549-Prometh-Fr13-ZW.mgf

Click mouse within plot area to zoom in by factor of two about that point

Or,   to  Da

Label all possible matches  Label matches used for scoring

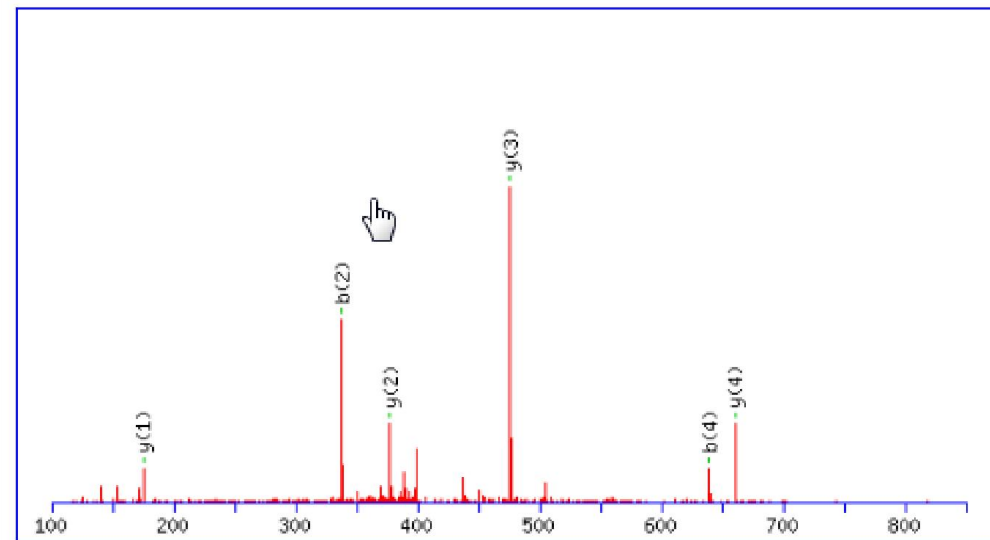

Monoisotopic mass of neutral peptide Mr(calc): 812.5392

Fixed modifications: Carbamidomethyl (C) (apply to specified residues or termini only)

Variable modifications:

N-term : Propionyl (protein N-term) (Protein N-term)

K2 : Propionyl (K)

K4 : Propionyl-(13CD3)Methyl (K)

Ions Score: 23 Expect: 0.67

Matches : 6/30 fragment ions using 13 most intense peaks [\(help\)](#)

| # | b               | b <sup>++</sup> | b <sup>+</sup> | b <sup>+++</sup> | b <sup>0</sup> | b <sup>0++</sup> | Seq. | y               | y <sup>++</sup> | y <sup>+</sup> | y <sup>+++</sup> | y <sup>0</sup> | y <sup>0++</sup> | # |
|---|-----------------|-----------------|----------------|------------------|----------------|------------------|------|-----------------|-----------------|----------------|------------------|----------------|------------------|---|
| 1 | 185.1285        | 93.0679         | 168.1019       | 84.5546          |                |                  | K    |                 |                 |                |                  |                |                  | 8 |
| 2 | <b>282.1812</b> | 141.5942        | 265.1547       | 133.0810         |                |                  | P    | <b>845.5112</b> | <b>423.2592</b> | 828.4847       | 414.7460         | 827.5006       | 414.2540         | 7 |
| 3 | 369.2132        | 185.1103        | 352.1867       | 176.5970         | 351.2027       | 176.1050         | S    | <b>748.4584</b> | 374.7329        | 731.4319       | 366.2196         | 730.4479       | 365.7276         | 6 |
| 4 | 482.2973        | 241.6523        | 465.2708       | 233.1390         | 464.2867       | 232.6470         | L    | <b>661.4264</b> | 331.2168        | 644.3999       | 322.7036         |                |                  | 5 |
| 5 | 684.4563        | 342.7318        | 667.4298       | 334.2185         | 666.4458       | 333.7265         | K    | <b>548.3424</b> | 274.6748        | 531.3158       | 266.1615         |                |                  | 4 |
| 6 | 741.4778        | 371.2425        | 724.4512       | 362.7293         | 723.4672       | 362.2372         | G    | <b>346.1833</b> | 173.5953        | 329.1568       | 165.0820         |                |                  | 3 |
| 7 | <b>855.5207</b> | 428.2640        | 838.4942       | 419.7507         | 837.5101       | 419.2587         | N    | 289.1619        | 145.0846        | 272.1353       | 136.5713         |                |                  | 2 |
| 8 |                 |                 |                |                  |                |                  | R    | <b>175.1190</b> | 88.0631         | 158.0924       | 79.5498          |                |                  | 1 |

Match to Query 3436: 1073.573828 from(537.794190, 2+) intensity(36450.6797)

Title: File1341 Spectrum2209 scans: 2678

Data file I:\2013-9-14-A549-Prometh-Fr13-ZW.mgf

Click mouse within plot area to zoom in by factor of two about that point

Or,   to  Da Label all possible matches  Label matches used for scoring 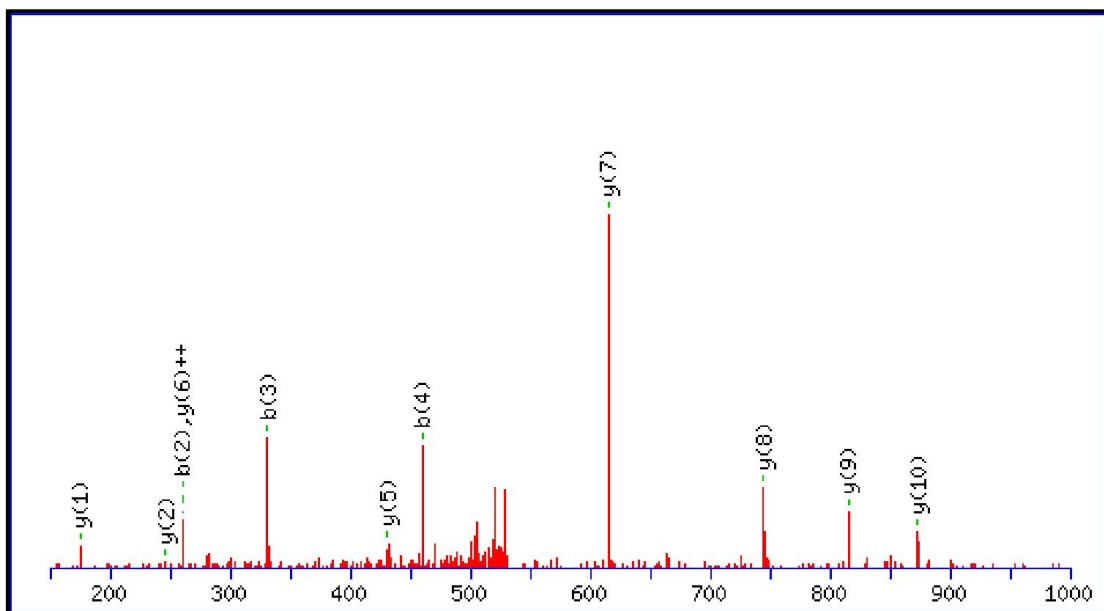Monoisotopic mass of neutral peptide  $M_r(\text{calc})$ : 1073.5738

Fixed modifications: Carbamidomethyl (C) (apply to specified residues or termini only)

Variable modifications:

K1 : Propionyl-(13CD3)Methyl (K)

Ions Score: 51 Expect: 0.0028

Matches : 11/104 fragment ions using 18 most intense peaks ([help](#))

| #  | b               | b <sup>+</sup> | b <sup>+</sup> | b <sup>+</sup> | b <sup>0</sup> | b <sup>0+</sup> | Seq. | y               | y <sup>+</sup>  | y <sup>+</sup> | y <sup>+</sup> | y <sup>0</sup> | y <sup>0+</sup> | #  |
|----|-----------------|----------------|----------------|----------------|----------------|-----------------|------|-----------------|-----------------|----------------|----------------|----------------|-----------------|----|
| 1  | 203.1663        | 102.0868       | 106.1397       | 93.5735        |                |                 | K    |                 |                 |                |                |                |                 | 11 |
| 2  | <b>260.1878</b> | 130.5975       | 243.1612       | 122.0842       |                |                 | G    | <b>872.4221</b> | 436.7147        | 855.3955       | 428.2014       | 854.4115       | 427.7094        | 10 |
| 3  | <b>331.2249</b> | 166.1161       | 314.1983       | 157.6023       |                |                 | A    | <b>815.4006</b> | 408.2039        | 798.3741       | 399.6907       | 797.3900       | 399.1987        | 9  |
| 4  | <b>460.2675</b> | 230.6374       | 443.2409       | 222.1341       | 442.2569       | 221.6321        | E    | <b>744.3635</b> | 372.6854        | 727.3369       | 364.1721       | 726.3529       | 363.6801        | 8  |
| 5  | 557.3202        | 279.1638       | 540.2937       | 270.6505       | 539.3097       | 270.1595        | P    | <b>615.3209</b> | 308.1641        | 598.2944       | 299.6508       | 597.3103       | 299.1582        | 7  |
| 6  | 644.3523        | 322.6798       | 627.3257       | 314.1665       | 626.3417       | 313.6745        | S    | 518.2681        | <b>259.6377</b> | 501.2416       | 251.1244       | 500.2576       | 250.6324        | 6  |
| 7  | 701.3737        | 351.1905       | 684.3472       | 342.6772       | 683.3632       | 342.1852        | G    | <b>431.2361</b> | 216.1217        | 414.2096       | 207.6084       |                |                 | 5  |
| 8  | 758.3952        | 379.7012       | 741.3686       | 371.1880       | 740.3846       | 370.6959        | G    | 374.2146        | 187.6110        | 357.1881       | 179.0977       |                |                 | 4  |
| 9  | 829.4323        | 415.2198       | 812.4057       | 406.7065       | 811.4217       | 406.2145        | A    | 317.1932        | 159.1002        | 300.1666       | 150.5870       |                |                 | 3  |
| 10 | 900.4694        | 450.7383       | 883.4429       | 442.2251       | 882.4588       | 441.7331        | A    | <b>246.1561</b> | 123.5817        | 229.1295       | 115.0684       |                |                 | 2  |
| 11 |                 |                |                |                |                |                 | R    | <b>175.1190</b> | 88.0631         | 158.0924       | 79.5498        |                |                 | 1  |

Match to Query 9179: 1551.758528 from(776.886540,2+) intensity(124892.4063)

Title: File1341 Spectrum9081 scans: 9897

Data file I:\2013-9-14-A549-Prometh-Fr13-ZW.mgf

Click mouse within plot area to zoom in by factor of two about that point

Or,  200 to 1600 Da Label all possible matches  Label matches used for scoring 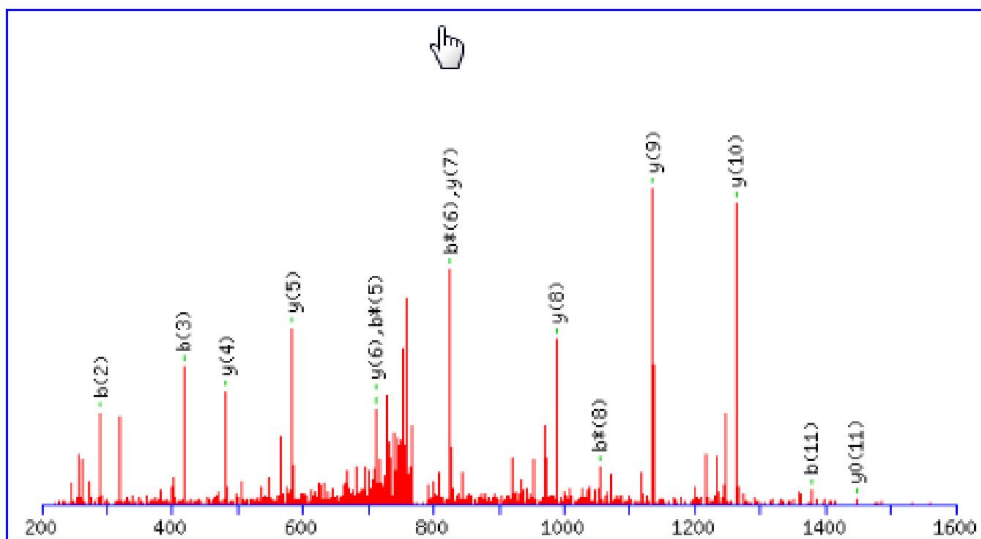

Monoisotopic mass of neutral peptide Mr(calc): 1551.7590

Fixed modifications: Carbamidomethyl (C) (apply to specified residues or termini only)

Variable modifications:

K2 : Propionyl-(13CD3)Methyl (K)

Ions Score: 64 Expect: 0.00012

Matches : 14/128 fragment ions using 14 most intense peaks [\(help\)](#)

| #  | b                | b <sup>++</sup> | b <sup>+</sup>   | b <sup>+++</sup> | b <sup>0</sup> | b <sup>0++</sup> | Seq. | y                | y <sup>++</sup> | y <sup>+</sup> | y <sup>+++</sup> | y <sup>0</sup>   | y <sup>0++</sup> | #  |
|----|------------------|-----------------|------------------|------------------|----------------|------------------|------|------------------|-----------------|----------------|------------------|------------------|------------------|----|
| 1  | 88.0393          | 44.5233         |                  |                  | 70.0287        | 35.5180          | S    |                  |                 |                |                  |                  |                  | 12 |
| 2  | <b>290.1983</b>  | 145.6028        | 273.1718         | 137.0895         | 272.1878       | 136.5975         | K    | 1465.7343        | 733.3708        | 1448.7077      | 724.8575         | <b>1447.7237</b> | 724.3655         | 11 |
| 3  | <b>418.2569</b>  | 209.6321        | 401.2303         | 201.1188         | 400.2463       | 200.6268         | Q    | <b>1263.5753</b> | 632.2913        | 1246.5487      | 623.7780         | 1245.5647        | 623.2860         | 10 |
| 4  | 565.3253         | 283.1663        | 548.2988         | 274.6530         | 547.3147       | 274.1610         | F    | <b>1135.5167</b> | 568.2620        | 1118.4902      | 559.7487         | 1117.5061        | 559.2567         | 9  |
| 5  | 728.3886         | 364.6980        | <b>711.3621</b>  | 356.1847         | 710.3781       | 355.6927         | Y    | <b>988.4483</b>  | 494.7278        | 971.4217       | 486.2145         | 970.4377         | 485.7225         | 8  |
| 6  | 842.4316         | 421.7194        | <b>825.4050</b>  | 413.2061         | 824.4210       | 412.7141         | N    | <b>825.3850</b>  | 413.1961        | 808.3584       | 404.6828         | 807.3744         | 404.1908         | 7  |
| 7  | 970.4901         | 485.7487        | 953.4636         | 477.2354         | 952.4796       | 476.7434         | Q    | <b>711.3420</b>  | 356.1747        | 694.3155       | 347.6614         | 693.3315         | 347.1694         | 6  |
| 8  | 1071.5378        | 536.2725        | <b>1054.5113</b> | 527.7593         | 1053.5273      | 527.2673         | T    | <b>583.2835</b>  | 292.1454        | 566.2569       | 283.6321         | 565.2729         | 283.1401         | 5  |
| 9  | 1234.6012        | 617.8042        | 1217.5746        | 609.2909         | 1216.5906      | 608.7989         | Y    | <b>482.2358</b>  | 241.6215        | 465.2092       | 233.1083         | 464.2252         | 232.6162         | 4  |
| 10 | 1291.6226        | 646.3149        | 1274.5961        | 637.8017         | 1273.6121      | 637.3097         | G    | 319.1724         | 160.0899        | 302.1459       | 151.5766         | 301.1619         | 151.0846         | 3  |
| 11 | <b>1378.6546</b> | 689.8310        | 1361.6281        | 681.3177         | 1360.6441      | 680.8257         | S    | 262.1510         | 131.5791        | 245.1244       | 123.0659         | 244.1404         | 122.5738         | 2  |
| 12 |                  |                 |                  |                  |                |                  | R    | 175.1190         | 88.0631         | 158.0924       | 79.5498          |                  |                  | 1  |

Match to Query 10447: 1675.972628 from(838.993590,2+) intensity(335509.1875)

Title: File1341 Spectrum11978 scans: 12915

Data file I:\2013-9-14-A549-Prometh-Fr13-ZW.mgf

Click mouse within plot area to zoom in by factor of two about that point

Or,  200 to 1600 Da Label all possible matches  Label matches used for scoring 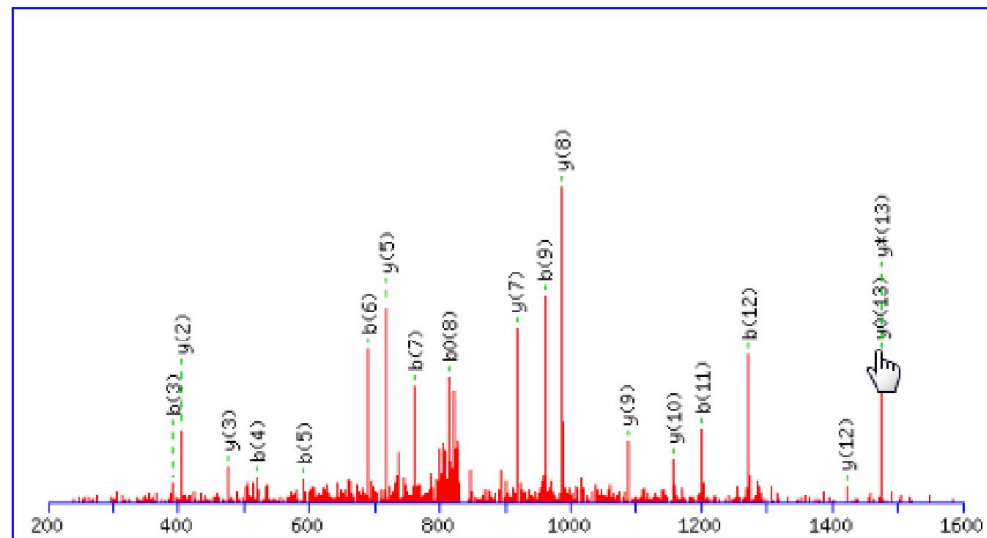

Monoisotopic mass of neutral peptide Mr(calc): 1675.9724

Fixed modifications: Carbamidomethyl (C) (apply to specified residues or termini only)

Variable modifications:

K1 : Propionyl (K)  
 M3 : Label:13C(1)2H(3) (M)  
 K11 : Propionyl (K)  
 K13 : Propionyl-(13CD3)Methyl (K)  
 K14 : Propionyl (K)

Ions Score: 66 Expect: 7.8e-005

Matches : 20/130 fragment ions using 28 most intense peaks [\(help\)](#)

| #  | b         | b <sup>++</sup> | b <sup>*</sup> | b <sup>+++</sup> | b <sup>0</sup> | b <sup>0++</sup> | Seq. | y         | y <sup>++</sup> | y <sup>*</sup> | y <sup>+++</sup> | y <sup>0</sup> | y <sup>0++</sup> | #  |
|----|-----------|-----------------|----------------|------------------|----------------|------------------|------|-----------|-----------------|----------------|------------------|----------------|------------------|----|
| 1  | 185.1285  | 93.0679         | 168.1019       | 84.5546          |                |                  | K    |           |                 |                |                  |                |                  | 14 |
| 2  | 256.1656  | 128.5864        | 239.1390       | 120.0731         |                |                  | A    | 1492.8585 | 746.9329        | 1475.8320      | 738.4196         | 1474.8479      | 737.9276         | 13 |
| 3  | 391.2282  | 196.1178        | 374.2017       | 187.6045         |                |                  | M    | 1421.8214 | 711.4143        | 1404.7948      | 702.9011         | 1403.8108      | 702.4090         | 12 |
| 4  | 520.2708  | 260.6391        | 503.2443       | 252.1258         | 502.2603       | 251.6338         | E    | 1286.7587 | 643.8830        | 1269.7322      | 635.3697         | 1268.7482      | 634.8777         | 11 |
| 5  | 591.3079  | 296.1576        | 574.2814       | 287.6443         | 573.2974       | 287.1523         | A    | 1157.7161 | 579.3617        | 1140.6896      | 570.8484         |                |                  | 10 |
| 6  | 690.3764  | 345.6918        | 673.3498       | 337.1785         | 672.3658       | 336.6865         | V    | 1086.6790 | 543.8431        | 1069.6525      | 535.3299         |                |                  | 9  |
| 7  | 761.4135  | 381.2104        | 744.3869       | 372.6971         | 743.4029       | 372.2051         | A    | 987.6106  | 494.3089        | 970.5840       | 485.7957         |                |                  | 8  |
| 8  | 832.4506  | 416.7289        | 815.4240       | 408.2157         | 814.4400       | 407.7236         | A    | 916.5735  | 458.7904        | 899.5469       | 450.2771         |                |                  | 7  |
| 9  | 960.5092  | 480.7582        | 943.4826       | 472.2449         | 942.4986       | 471.7529         | Q    | 845.5364  | 423.2718        | 828.5098       | 414.7585         |                |                  | 6  |
| 10 | 1017.5306 | 509.2690        | 1000.5041      | 500.7557         | 999.5201       | 500.2637         | G    | 717.4778  | 359.2425        | 700.4512       | 350.7293         |                |                  | 5  |
| 11 | 1201.6518 | 601.3295        | 1184.6253      | 592.8163         | 1183.6412      | 592.3243         | K    | 660.4563  | 330.7318        | 643.4298       | 322.2185         |                |                  | 4  |
| 12 | 1272.6889 | 636.8481        | 1255.6624      | 628.3348         | 1254.6784      | 627.8428         | A    | 476.3351  | 238.6712        | 459.3086       | 230.1579         |                |                  | 3  |
| 13 | 1474.8479 | 737.9276        | 1457.8214      | 729.4143         | 1456.8374      | 728.9223         | K    | 405.2980  | 203.1527        | 388.2715       | 194.6394         |                |                  | 2  |
| 14 |           |                 |                |                  |                |                  | K    | 203.1390  | 102.0731        | 186.1125       | 93.5599          |                |                  | 1  |

Match to Query 510: 803.441808 from(402.728180,2+) intensity(12087.5791)  
 Title: File1344 Spectrum1354 scans: 2002  
 Data file I:\2013-9-14-A549-Prometh-Fr12-ZW.mgf

Click mouse within plot area to zoom in by factor of two about that point

Or,   to  Da

Label all possible matches  Label matches used for scoring

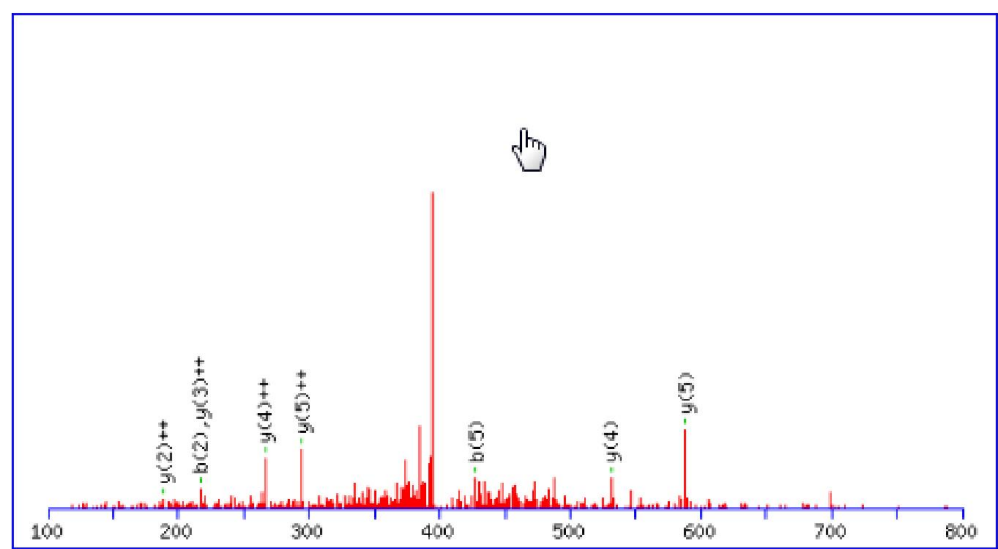

Monoisotopic mass of neutral peptide Mr(calc): 803.4410  
 Fixed modifications: Carbamidomethyl (C) (apply to specified residues or termini only)  
 Variable modifications:  
 K6 : Propionyl-(13CD3)Methyl (K)  
 Ions Score: 21 Expect: 2  
 Matches : 8/52 fragment ions using 21 most intense peaks [\(help\)](#)

| # | b               | b <sup>++</sup> | b <sup>*</sup> | b <sup>+++</sup> | b <sup>0</sup> | b <sup>0++</sup> | Seq. | y               | y <sup>++</sup> | y <sup>*</sup> | y <sup>+++</sup> | y <sup>0</sup> | y <sup>0++</sup> | # |
|---|-----------------|-----------------|----------------|------------------|----------------|------------------|------|-----------------|-----------------|----------------|------------------|----------------|------------------|---|
| 1 | 116.0342        | 58.5207         |                |                  | 98.0237        | 49.5155          | D    |                 |                 |                |                  |                |                  | 7 |
| 2 | <b>217.0819</b> | 109.0446        |                |                  | 199.0713       | 100.0393         | T    | 689.4213        | 345.2143        | 672.3948       | 336.7010         | 671.4108       | 336.2090         | 6 |
| 3 | 274.1034        | 137.5553        |                |                  | 256.0928       | 128.5500         | G    | <b>588.3737</b> | <b>294.6905</b> | 571.3471       | 286.1772         |                |                  | 5 |
| 4 | 371.1561        | 186.0817        |                |                  | 353.1456       | 177.0764         | P    | <b>531.3522</b> | <b>266.1797</b> | 514.3256       | 257.6665         |                |                  | 4 |
| 5 | <b>428.1776</b> | 214.5924        |                |                  | 410.1670       | 205.5872         | G    | 434.2994        | <b>217.6534</b> | 417.2729       | 209.1401         |                |                  | 3 |
| 6 | 630.3366        | 315.6719        | 613.3101       | 307.1587         | 612.3260       | 306.6667         | K    | 377.2780        | <b>189.1426</b> | 360.2514       | 180.6293         |                |                  | 2 |
| 7 |                 |                 |                |                  |                |                  | R    | 175.1190        | <b>88.0631</b>  | 158.0924       | 79.5498          |                |                  | 1 |

Match to Query 4023: 1185.735808 from(593.875180,2+) intensity(435725.2813)

Title: File1344 Spectrum6891 scans: 8054

Data file I:\2013-9-14-A549-Prometh-Fr12-ZW.mgf

Click mouse within plot area to zoom in by factor of two about that point

Or,  150 to 1200 Da Label all possible matches  Label matches used for scoring 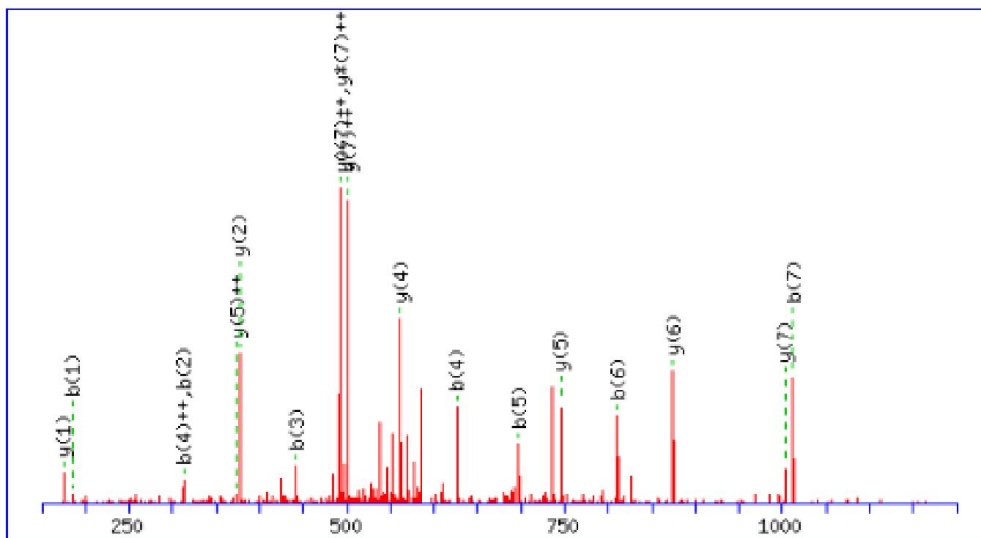

Monoisotopic mass of neutral peptide Mr(calc) : 1185.7354

Fixed modifications: Carbamidomethyl (C) (apply to specified residues or termini only)

Variable modifications:

K1 : Propionyl (K)

K4 : Propionyl (K)

K7 : Propionyl-(13CD3)Methyl (K)

Ions Score: 46 Expect: 0.0042

Matches : 18/70 fragment ions using 30 most intense peaks [\(help\)](#)

| # | b                | b <sup>++</sup> | b <sup>+</sup> | b <sup>+++</sup> | b <sup>0</sup> | b <sup>0++</sup> | Seq. | y                | y <sup>++</sup> | y <sup>+</sup> | y <sup>+++</sup> | y <sup>0</sup> | y <sup>0++</sup> | # |
|---|------------------|-----------------|----------------|------------------|----------------|------------------|------|------------------|-----------------|----------------|------------------|----------------|------------------|---|
| 1 | <b>185.1285</b>  | 93.0679         | 168.1019       | 84.5546          |                |                  | K    |                  |                 |                |                  |                |                  | 8 |
| 2 | <b>313.1870</b>  | 157.0972        | 296.1605       | 148.5839         |                |                  | Q    | <b>1002.6215</b> | <b>501.8144</b> | 985.5949       | <b>493.3011</b>  | 984.6109       | <b>492.8091</b>  | 7 |
| 3 | <b>442.2296</b>  | 221.6185        | 425.2031       | 213.1052         | 424.2191       | 212.6132         | E    | <b>874.5629</b>  | 437.7851        | 857.5364       | 429.2718         | 856.5523       | 428.7798         | 6 |
| 4 | <b>626.3508</b>  | <b>313.6790</b> | 609.3243       | 305.1658         | 608.3402       | 304.6738         | K    | <b>745.5203</b>  | <b>373.2638</b> | 728.4938       | 364.7505         |                |                  | 5 |
| 5 | <b>697.3879</b>  | 349.1976        | 680.3614       | 340.6843         | 679.3774       | 340.1923         | A    | <b>561.3991</b>  | 281.2032        | 544.3726       | 272.6899         |                |                  | 4 |
| 6 | <b>810.4720</b>  | 405.7396        | 793.4454       | 397.2264         | 792.4614       | 396.7343         | L    | 490.3620         | 245.6847        | 473.3355       | 237.1714         |                |                  | 3 |
| 7 | <b>1012.6310</b> | 506.8191        | 995.6044       | 498.3059         | 994.6204       | 497.8139         | K    | <b>377.2780</b>  | 189.1426        | 360.2514       | 180.6293         |                |                  | 2 |
| 8 |                  |                 |                |                  |                |                  | R    | <b>175.1190</b>  | 88.0631         | 158.0924       | 79.5498          |                |                  | 1 |

Match to Query 8805: 1777.962128 from(889.988340,2+) intensity(17791.3906)

Title: File1350 Spectrum7597 scans: 8237

Data file J:\2013-9-14-A549-Prometh-Fr11-ZW.mgf

Click mouse within plot area to zoom in by factor of two about that point

Or,  200 to 1700 Da Label all possible matches  Label matches used for scoring 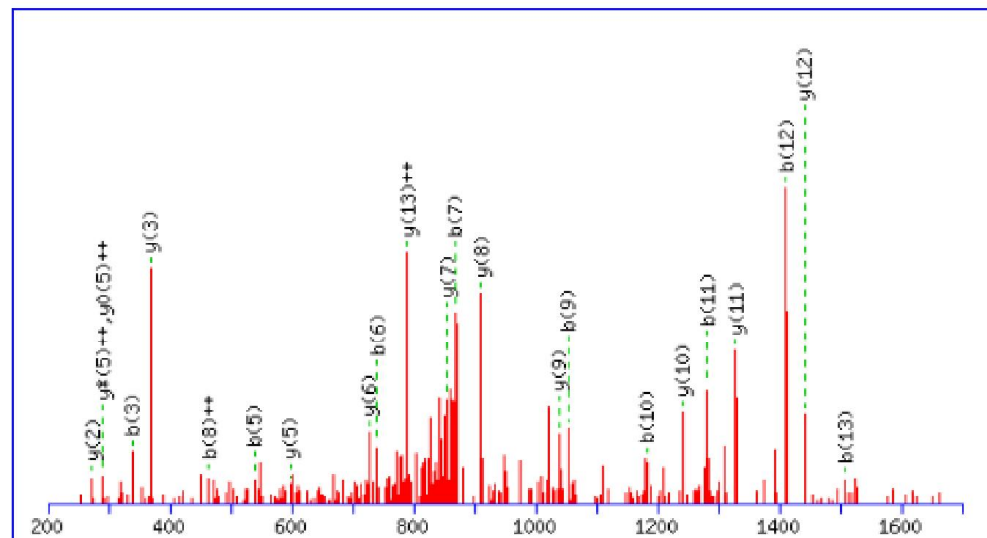

Monoisotopic mass of neutral peptide Mr(calc): 1777.9595

Fixed modifications: Carbamidomethyl (C) (apply to specified residues or termini only)

Variable modifications:

K6 : Propionyl-(13CD3)Methyl (K)

Ions Score: 54 Expect: 0.0024

Matches : 23/150 fragment ions using 43 most intense peaks ([help](#))

| #  | b                | b <sup>++</sup> | b <sup>+</sup> | b <sup>+++</sup> | b <sup>0</sup> | b <sup>0++</sup> | Seq. | y                | y <sup>++</sup> | y <sup>+</sup> | y <sup>+++</sup> | y <sup>0</sup> | y <sup>0++</sup> | #  |
|----|------------------|-----------------|----------------|------------------|----------------|------------------|------|------------------|-----------------|----------------|------------------|----------------|------------------|----|
| 1  | 114.0913         | 57.5493         |                |                  |                |                  | I    |                  |                 |                |                  |                |                  | 15 |
| 2  | 201.1234         | 101.0653        |                |                  | 183.1128       | 92.0600          | S    | 1665.8827        | 833.4450        | 1648.8562      | 824.9317         | 1647.8722      | 824.4397         | 14 |
| 3  | <b>338.1823</b>  | 169.5948        |                |                  | 320.1717       | 160.5895         | H    | 1578.8507        | <b>789.9290</b> | 1561.8242      | 781.4157         | 1560.8402      | 780.9237         | 13 |
| 4  | 451.2663         | 226.1368        |                |                  | 433.2558       | 217.1315         | L    | <b>1441.7918</b> | 721.3995        | 1424.7653      | 712.8863         | 1423.7812      | 712.3943         | 12 |
| 5  | <b>538.2984</b>  | 269.6528        |                |                  | 520.2878       | 260.6475         | S    | <b>1328.7077</b> | 664.8575        | 1311.6812      | 656.3442         | 1310.6972      | 655.8522         | 11 |
| 6  | <b>740.4574</b>  | 370.7323        | 723.4308       | 362.2191         | 722.4468       | 361.7270         | K    | <b>1241.6757</b> | 621.3415        | 1224.6492      | 612.8282         | 1223.6651      | 612.3362         | 10 |
| 7  | <b>868.5160</b>  | 434.7616        | 851.4894       | 426.2483         | 850.5054       | 425.7563         | Q    | <b>1039.5167</b> | 520.2620        | 1022.4902      | 511.7487         | 1021.5061      | 511.2567         | 9  |
| 8  | 925.5374         | <b>463.2724</b> | 908.5109       | 454.7591         | 907.5269       | 454.2671         | G    | <b>911.4581</b>  | 456.2327        | 894.4316       | 447.7194         | 893.4476       | 447.2274         | 8  |
| 9  | <b>1053.5960</b> | 527.3016        | 1036.5695      | 518.7884         | 1035.5854      | 518.2964         | Q    | <b>854.4367</b>  | 427.7220        | 837.4101       | 419.2087         | 836.4261       | 418.7167         | 7  |
| 10 | <b>1182.6386</b> | 591.8229        | 1165.6120      | 583.3097         | 1164.6280      | 582.8177         | E    | <b>726.3781</b>  | 363.6927        | 709.3515       | 355.1794         | 708.3675       | 354.6874         | 6  |
| 11 | <b>1281.7070</b> | 641.3571        | 1264.6805      | 632.8439         | 1263.6964      | 632.3519         | V    | <b>597.3355</b>  | 299.1714        | 580.3089       | <b>290.6581</b>  | 579.3249       | <b>290.1661</b>  | 5  |
| 12 | <b>1410.7496</b> | 705.8784        | 1393.7231      | 697.3652         | 1392.7390      | 696.8732         | E    | 498.2671         | 249.6372        | 481.2405       | 241.1239         | 480.2565       | 240.6319         | 4  |
| 13 | <b>1507.8024</b> | 754.4048        | 1490.7758      | 745.8915         | 1489.7918      | 745.3995         | P    | <b>369.2245</b>  | 185.1159        | 352.1979       | 176.6026         |                |                  | 3  |
| 14 | 1604.8551        | 802.9312        | 1587.8286      | 794.4179         | 1586.8446      | 793.9259         | P    | <b>272.1717</b>  | 136.5895        | 255.1452       | 128.0762         |                |                  | 2  |
| 15 |                  |                 |                |                  |                |                  | R    | 175.1190         | 88.0631         | 158.0924       | 79.5498          |                |                  | 1  |

# MS/MS Fragmentation of **TAKKVQR**

Found in **B4DY13**, Nucleolar GTP-binding protein 1 OS=Homo sapiens GN=GTPBP4 PE=2 SV=1

Match to Query 2365: 959.603068 from(480.808810,2+) intensity(49457.5820)

Title: File1338 Spectrum4649 scans: 5169

Data file I:\2013-9-14-A549-Prometh-Fr2-ZW.mgf

Click mouse within plot area to zoom in by factor of two about that point

Or,   to  Da

Label all possible matches  Label matches used for scoring

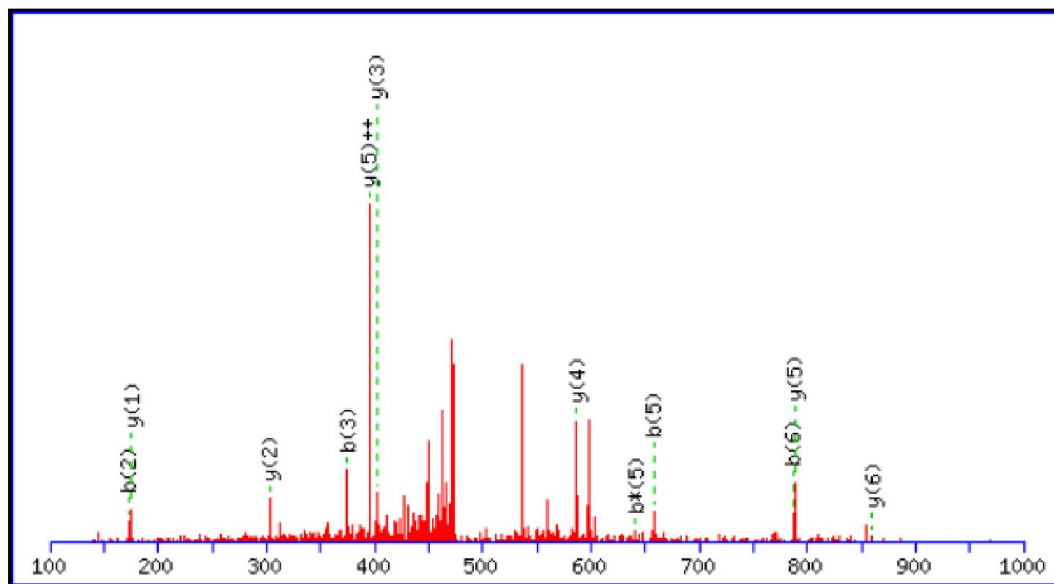

Monoisotopic mass of neutral peptide Mr(calc): 959.6036

Fixed modifications: Carbamidomethyl (C) (apply to specified residue)

Variable modifications:

K3 : Propionyl-(13CD3)Methyl (K)

K4 : Propionyl (K)

Ions Score: 38 Expect: 0.033

Matches : 12/56 fragment ions using 24 most intense peaks [\(help\)](#)

| # | b               | b <sup>++</sup> | b*              | b <sup>*++</sup> | b <sup>0</sup> | b <sup>0++</sup> | Seq. | y               | y <sup>++</sup> | y*       | y <sup>*++</sup> | # |
|---|-----------------|-----------------|-----------------|------------------|----------------|------------------|------|-----------------|-----------------|----------|------------------|---|
| 1 | 102.0550        | 51.5311         |                 |                  | 84.0444        | 42.5258          | T    |                 |                 |          |                  | 7 |
| 2 | <b>173.0921</b> | 87.0497         |                 |                  | 155.0815       | 78.0444          | A    | <b>859.5632</b> | 430.2853        | 842.5367 | 421.7720         | 6 |
| 3 | <b>375.2511</b> | 188.1292        | 358.2245        | 179.6159         | 357.2405       | 179.1239         | K    | <b>788.5261</b> | <b>394.7667</b> | 771.4996 | 386.2534         | 5 |
| 4 | 559.3723        | 280.1898        | 542.3457        | 271.6765         | 541.3617       | 271.1845         | K    | <b>586.3671</b> | 293.6872        | 569.3406 | 285.1739         | 4 |
| 5 | <b>658.4407</b> | 329.7240        | <b>641.4141</b> | 321.2107         | 640.4301       | 320.7187         | V    | <b>402.2459</b> | 201.6266        | 385.2194 | 193.1133         | 3 |
| 6 | <b>786.4993</b> | 393.7533        | 769.4727        | 385.2400         | 768.4887       | 384.7480         | Q    | <b>303.1775</b> | 152.0924        | 286.1510 | 143.5791         | 2 |
| 7 |                 |                 |                 |                  |                |                  | R    | <b>175.1190</b> | 88.0631         | 158.0924 | 79.5498          | 1 |



Found in **Q8NCF5**, NFATC2-interacting protein OS=Homo sapiens GN=NFATC2IP PE=1 SV=1

Match to Query 7460: 1470.902928 from(736.458740,2+) intensity(34848.6563)

Title: File1338 Spectrum12611 scans: 13505

Data file I:\2013-9-14-A549-Prometh-Fr2-ZW.mgf

Click mouse within plot area to zoom in by factor of two about that point

Or,   to  Da Label all possible matches  Label matches used for scoring 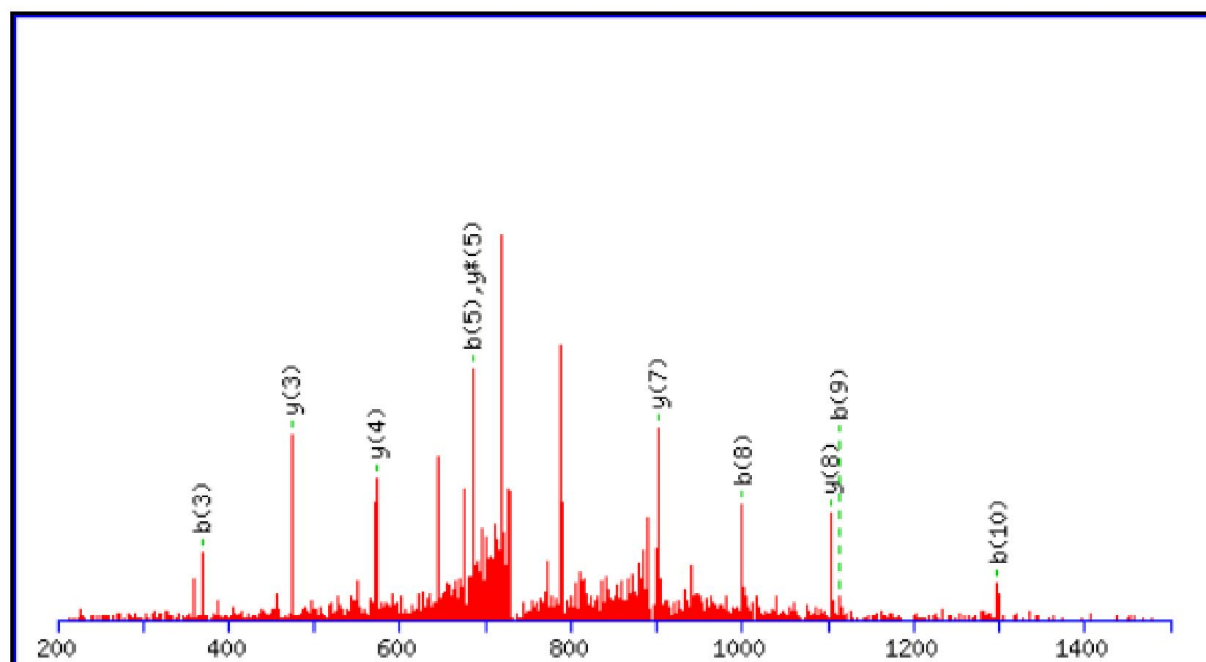

Monoisotopic mass of neutral peptide Mr(calc): 1470.9042

Fixed modifications: Carbamidomethyl (C) (apply to specific)

Variable modifications:

K3 : Propionyl (K)

K4 : Propionyl-(13CD3)Methyl (K)

K10 : Propionyl (K)

Ions Score: 43 Expect: 0.0093

Matches : 10/98 fragment ions using 13 most intense peaks

| #  | b                | b <sup>++</sup> | b <sup>*</sup> | b <sup>+++</sup> | b <sup>0</sup> | b <sup>0++</sup> | Seq. | y                | y <sup>++</sup> | y <sup>*</sup>  | y <sup>+++</sup> | y <sup>0</sup> | y <sup>0++</sup> | #  |
|----|------------------|-----------------|----------------|------------------|----------------|------------------|------|------------------|-----------------|-----------------|------------------|----------------|------------------|----|
| 1  | 72.0444          | 36.5258         |                |                  |                |                  | A    |                  |                 |                 |                  |                |                  | 11 |
| 2  | 185.1285         | 93.0679         |                |                  |                |                  | L    | 1400.8744        | 700.9408        | 1383.8479       | 692.4276         | 1382.8638      | 691.9356         | 10 |
| 3  | <b>369.2496</b>  | 185.1285        | 352.2231       | 176.6152         |                |                  | K    | 1287.7903        | 644.3988        | 1270.7638       | 635.8855         | 1269.7798      | 635.3935         | 9  |
| 4  | 571.4086         | 286.2080        | 554.3821       | 277.6947         |                |                  | K    | <b>1103.6692</b> | 552.3382        | 1086.6426       | 543.8249         | 1085.6586      | 543.3329         | 8  |
| 5  | <b>684.4927</b>  | 342.7500        | 667.4662       | 334.2367         |                |                  | L    | <b>901.5102</b>  | 451.2587        | 884.4836        | 442.7454         | 883.4996       | 442.2534         | 7  |
| 6  | 771.5247         | 386.2660        | 754.4982       | 377.7527         | 753.5142       | 377.2607         | S    | 788.4261         | 394.7167        | 771.3995        | 386.2034         | 770.4155       | 385.7114         | 6  |
| 7  | 900.5673         | 450.7873        | 883.5408       | 442.2740         | 882.5568       | 441.7820         | E    | 701.3941         | 351.2007        | <b>684.3675</b> | 342.6874         | 683.3835       | 342.1954         | 5  |
| 8  | <b>999.6357</b>  | 500.3215        | 982.6092       | 491.8082         | 981.6252       | 491.3162         | V    | <b>572.3515</b>  | 286.6794        | 555.3249        | 278.1661         |                |                  | 4  |
| 9  | <b>1113.6787</b> | 557.3430        | 1096.6521      | 548.8297         | 1095.6681      | 548.3377         | N    | <b>473.2831</b>  | 237.1452        | 456.2565        | 228.6319         |                |                  | 3  |
| 10 | <b>1297.7998</b> | 649.4036        | 1280.7733      | 640.8903         | 1279.7893      | 640.3983         | K    | 359.2401         | 180.1237        | 342.2136        | 171.6104         |                |                  | 2  |
| 11 |                  |                 |                |                  |                |                  | R    | 175.1190         | 88.0631         | 158.0924        | 79.5498          |                |                  | 1  |

Match to Query 9028: 1573.821988 from(787.918270,2+) intensity(44815.3320)

Title: File1368 Spectrum9031 scans: 9741

Data file J:\2013-9-14-A549-Prometh-Fr6-ZW.mgf

Click mouse within plot area to zoom in by factor of two about that point

Or,   to  Da Label all possible matches  Label matches used for scoring 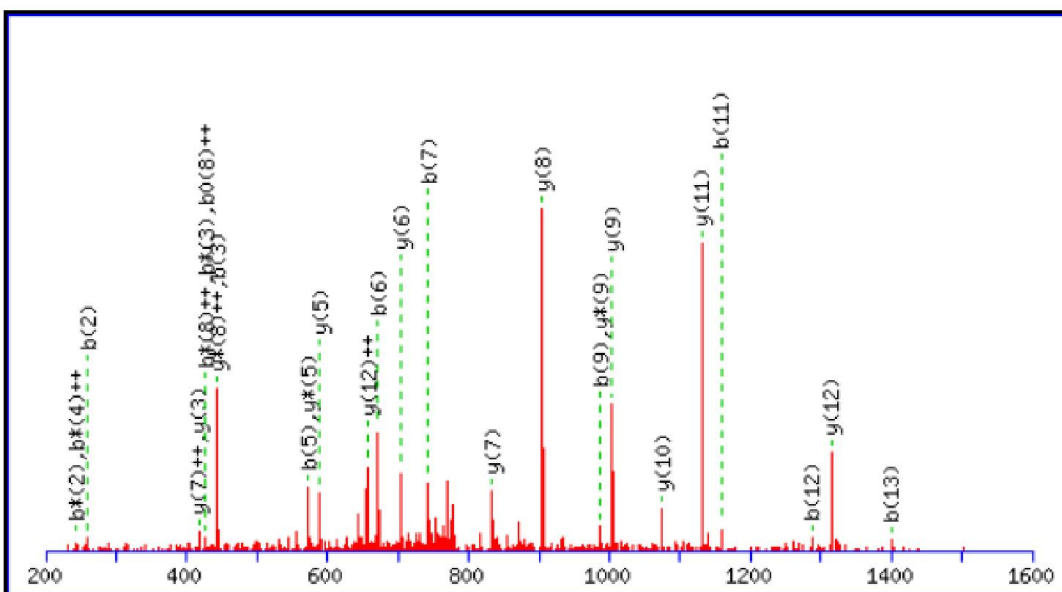

Monoisotopic mass of neutral peptide Mr(calc): 1573.8220

Fixed modifications: Carbamidomethyl (C) (apply to specified residue)

Variable modifications:

K2 : Propionyl-(13CD3)Methyl (K)

K3 : Propionyl (K)

Ions Score: 63 Expect: 0.00027

Matches : 28/136 fragment ions using 39 most intense peaks [\(help\)](#)

| #  | b                | b <sup>++</sup> | b <sup>*</sup>  | b <sup>*++</sup> | b <sup>0</sup> | b <sup>0++</sup> | Seq. | y                | y <sup>++</sup> | y <sup>*</sup>  | y <sup>*++</sup> | y <sup>0</sup> | y <sup>0++</sup> | #  |
|----|------------------|-----------------|-----------------|------------------|----------------|------------------|------|------------------|-----------------|-----------------|------------------|----------------|------------------|----|
| 1  | 58.0287          | 29.5180         |                 |                  |                |                  | G    |                  |                 |                 |                  |                |                  | 14 |
| 2  | <b>260.1878</b>  | 130.5975        | <b>243.1612</b> | 122.0842         |                |                  | K    | 1517.8078        | 759.4076        | 1500.7813       | 750.8943         | 1499.7973      | 750.4023         | 13 |
| 3  | <b>444.3089</b>  | 222.6581        | <b>427.2824</b> | 214.1448         |                |                  | K    | <b>1315.6488</b> | <b>658.3281</b> | 1298.6223       | 649.8148         | 1297.6383      | 649.3228         | 12 |
| 4  | 501.3304         | 251.1688        | 484.3038        | <b>242.6556</b>  |                |                  | G    | <b>1131.5277</b> | 566.2675        | 1114.5011       | 557.7542         | 1113.5171      | 557.2622         | 11 |
| 5  | <b>572.3675</b>  | 286.6874        | 555.3410        | 278.1741         |                |                  | A    | <b>1074.5062</b> | 537.7567        | 1057.4796       | 529.2435         | 1056.4956      | 528.7515         | 10 |
| 6  | <b>671.4359</b>  | 336.2216        | 654.4094        | 327.7083         |                |                  | V    | <b>1003.4691</b> | 502.2382        | <b>986.4425</b> | 493.7249         | 985.4585       | 493.2329         | 9  |
| 7  | <b>742.4730</b>  | 371.7402        | 725.4465        | 363.2269         |                |                  | A    | <b>904.4007</b>  | 452.7040        | 887.3741        | <b>444.1907</b>  | 886.3901       | 443.6987         | 8  |
| 8  | 871.5156         | 436.2615        | 854.4891        | <b>427.7482</b>  | 853.5051       | <b>427.2562</b>  | E    | <b>833.3636</b>  | <b>417.1854</b> | 816.3370        | 408.6721         | 815.3530       | 408.1801         | 7  |
| 9  | <b>986.5426</b>  | 493.7749        | 969.5160        | 485.2616         | 968.5320       | 484.7696         | D    | <b>704.3210</b>  | 352.6641        | 687.2944        | 344.1508         | 686.3104       | 343.6588         | 6  |
| 10 | 1043.5640        | 522.2857        | 1026.5375       | 513.7724         | 1025.5535      | 513.2804         | G    | <b>589.2940</b>  | 295.1506        | <b>572.2675</b> | 286.6374         | 571.2835       | 286.1454         | 5  |
| 11 | <b>1158.5910</b> | 579.7991        | 1141.5644       | 571.2859         | 1140.5804      | 570.7938         | D    | 532.2726         | 266.6399        | 515.2460        | 258.1266         | 514.2620       | 257.6346         | 4  |
| 12 | <b>1287.6336</b> | 644.3204        | 1270.6070       | 635.8071         | 1269.6230      | 635.3151         | E    | <b>417.2456</b>  | 209.1264        | 400.2191        | 200.6132         | 399.2350       | 200.1212         | 3  |
| 13 | <b>1400.7176</b> | 700.8625        | 1383.6911       | 692.3492         | 1382.7071      | 691.8572         | L    | 288.2030         | 144.6051        | 271.1765        | 136.0919         |                |                  | 2  |
| 14 |                  |                 |                 |                  |                |                  | R    | 175.1190         | 88.0631         | 158.0924        | 79.5498          |                |                  | 1  |

Found in **Q8WW12-3**, Isoform 3 of PEST proteolytic signal-containing nuclear protein OS=Homo sapiens GN=PCNP

Match to Query 627: 795.481668 from(398.748110,2+) intensity(25127.4668)

Title: File1341 Spectrum6057 scans: 6746

Data file I:\2013-9-14-A549-Prometh-Fr13-ZW.mgf

Click mouse within plot area to zoom in by factor of two about that point

Or,   to  Da Label all possible matches  Label matches used for scoring 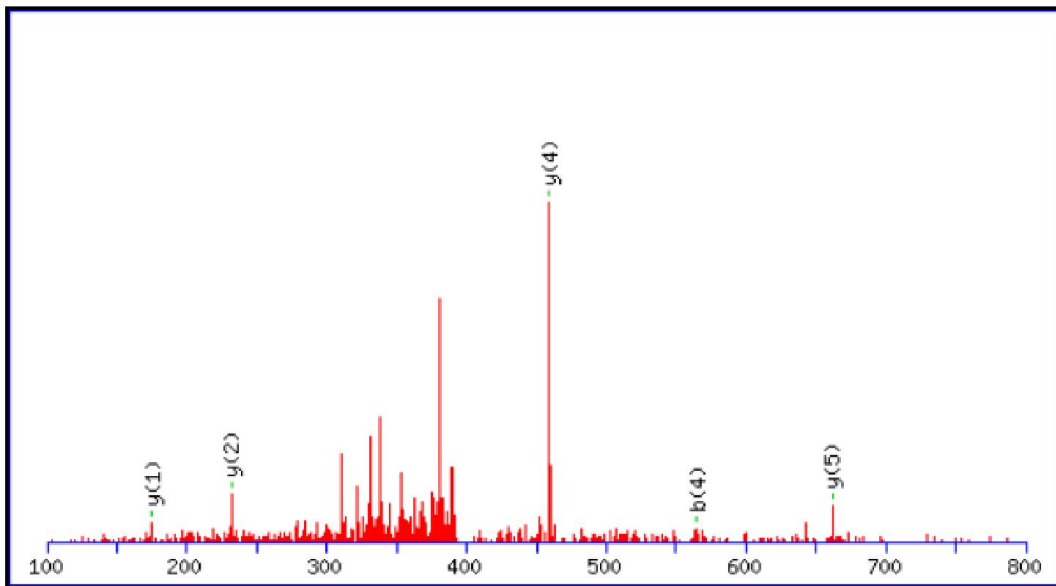

Monoisotopic mass of neutral peptide Mr(calc): 795.4818

Fixed modifications: Carbamidomethyl (C) (apply to specified residues or termini only)

Variable modifications:

M1 : Label:13C(1)2H(3) (M)

K2 : Propionyl-(13CD3)Methyl (K)

Ions Score: 26 Expect: 0.37

Matches : 5/38 fragment ions using 7 most intense peaks ([help](#))

| # | b        | b <sup>++</sup> | b <sup>*</sup> | b <sup>*++</sup> | Seq. | y        | y <sup>++</sup> | y <sup>*</sup> | y <sup>*++</sup> | # |
|---|----------|-----------------|----------------|------------------|------|----------|-----------------|----------------|------------------|---|
| 1 | 136.0699 | 68.5386         |                |                  | M    |          |                 |                |                  | 6 |
| 2 | 338.2290 | 169.6181        | 321.2024       | 161.1048         | K    | 661.4264 | 331.2168        | 644.3999       | 322.7036         | 5 |
| 3 | 452.2719 | 226.6396        | 435.2453       | 218.1263         | N    | 459.2674 | 230.1373        | 442.2409       | 221.6241         | 4 |
| 4 | 565.3560 | 283.1816        | 548.3294       | 274.6683         | I    | 345.2245 | 173.1159        | 328.1979       | 164.6026         | 3 |
| 5 | 622.3774 | 311.6923        | 605.3509       | 303.1791         | G    | 232.1404 | 116.5738        | 215.1139       | 108.0606         | 2 |
| 6 |          |                 |                |                  | R    | 175.1190 | 88.0631         | 158.0924       | 79.5498          | 1 |

Match to Query 18515: 2582.422812 from(861.814880,3+) intensity(30429.6426)

Title: File1341 Spectrum7601 scans: 8355

Data file I:\2013-9-14-A549-Prometh-Fr13-ZW.mgf

Click mouse within plot area to zoom in by factor of two about that point

Or,  200 to 2000 Da

Label all possible matches  Label matches used for scoring

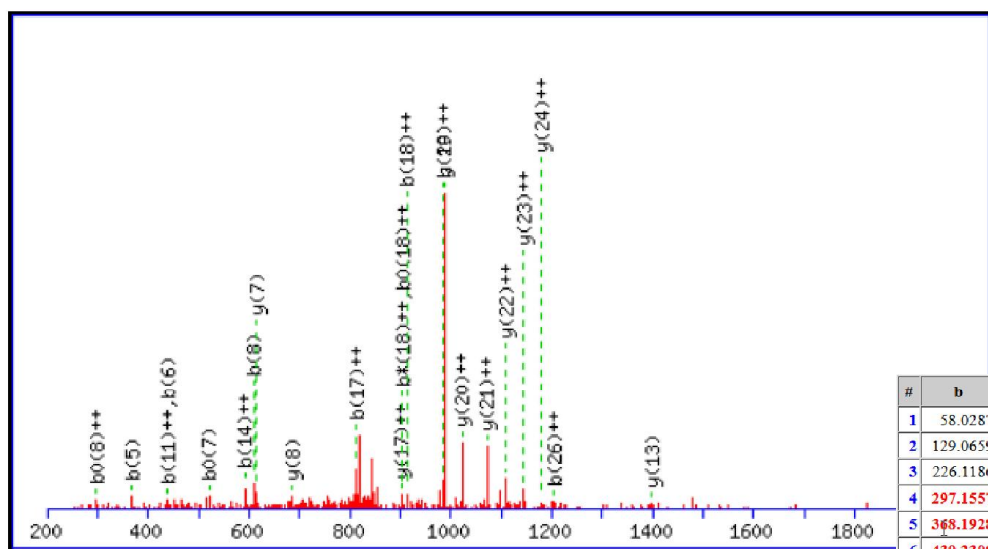

Monoisotopic mass of neutral peptide Mr(calc): 2582.4201

Fixed modifications: Carbamidomethyl (C) (apply to specified residue)

Variable modifications:

K15 : Propionyl (K)

K17 : Propionyl (K)

K18 : Propionyl-(13CD3)Methyl (K)

Ions Score: 28 Expect: 0.88

Matches : 25/270 fragment ions using 58 most intense peaks [\(help\)](#)

| #  | b               | b <sup>++</sup>  | b*        | b <sup>+++</sup> | b <sup>0</sup>  | b <sup>0++</sup> | Seq. | y                | y <sup>++</sup>  | y*        | y <sup>+++</sup> | y <sup>0</sup> | y <sup>0++</sup> | #  |
|----|-----------------|------------------|-----------|------------------|-----------------|------------------|------|------------------|------------------|-----------|------------------|----------------|------------------|----|
| 1  | 58.0287         | 29.5180          |           |                  |                 |                  | G    |                  |                  |           |                  |                |                  | 27 |
| 2  | 129.0659        | 65.0366          |           |                  |                 |                  | A    | 2526.4060        | 1263.7066        | 2509.3794 | 1255.1933        | 2508.3954      | 1254.7013        | 26 |
| 3  | 226.1186        | 113.5629         |           |                  |                 |                  | P    | 2455.3689        | 1228.1881        | 2438.3423 | 1219.6748        | 2437.3583      | 1219.1828        | 25 |
| 4  | <b>297.1557</b> | 149.0815         |           |                  |                 |                  | A    | 2358.3161        | <b>1179.6617</b> | 2341.2895 | 1171.1484        | 2340.3055      | 1170.6564        | 24 |
| 5  | <b>368.1928</b> | 184.6001         |           |                  |                 |                  | A    | 2287.2790        | <b>1144.1431</b> | 2270.2524 | 1135.6299        | 2269.2684      | 1135.1378        | 23 |
| 6  | <b>439.2300</b> | 220.1186         |           |                  |                 |                  | A    | 2216.2419        | <b>1108.6246</b> | 2199.2153 | 1100.1113        | 2198.2313      | 1099.6193        | 22 |
| 7  | 540.2776        | 270.6425         |           |                  | 522.2671        | 261.6372         | T    | 2145.2048        | <b>1073.1060</b> | 2128.1782 | 1064.5927        | 2127.1942      | 1064.1007        | 21 |
| 8  | <b>611.3148</b> | 306.1610         |           |                  | <b>593.3042</b> | <b>297.1557</b>  | A    | 2044.1571        | <b>1022.5822</b> | 2027.1305 | 1014.0689        | 2026.1465      | 1013.5769        | 20 |
| 9  | 708.3675        | 354.6874         |           |                  | 690.3570        | 345.6821         | P    | 1973.1200        | <b>987.0636</b>  | 1956.0934 | 978.5503         | 1955.1094      | 978.0583         | 19 |
| 10 | 779.4046        | 390.2060         |           |                  | 761.3941        | 381.2007         | A    | 1876.0672        | 938.5372         | 1859.0406 | 930.0240         | 1858.0566      | 929.5320         | 18 |
| 11 | 876.4574        | <b>438.7323</b>  |           |                  | 858.4468        | 429.7271         | P    | 1805.0301        | <b>903.0187</b>  | 1788.0035 | 894.5054         | 1787.0195      | 894.0134         | 17 |
| 12 | 977.5051        | 489.2562         |           |                  | 959.4945        | 480.2509         | T    | 1707.9773        | 854.4923         | 1690.9508 | 845.9790         | 1689.9668      | 845.4870         | 16 |
| 13 | 1048.5422       | 524.7747         |           |                  | 1030.5316       | 515.7694         | A    | 1606.9296        | 803.9685         | 1589.9031 | 795.4552         | 1588.9191      | 794.9632         | 15 |
| 14 | 1185.6011       | <b>593.3042</b>  |           |                  | 1167.5905       | 584.2989         | H    | 1535.8925        | 768.4499         | 1518.8660 | 759.9366         | 1517.8820      | 759.4446         | 14 |
| 15 | 1369.7223       | 685.3648         | 1352.6957 | 676.8515         | 1351.7117       | 676.3595         | K    | <b>1398.8336</b> | 699.9204         | 1381.8071 | 691.4072         | 1380.8230      | 690.9152         | 13 |
| 16 | 1440.7594       | 720.8833         | 1423.7328 | 712.3701         | 1422.7488       | 711.8781         | A    | 1214.7124        | 607.8599         | 1197.6859 | 599.3466         | 1196.7019      | 598.8546         | 12 |
| 17 | 1624.8806       | <b>812.9439</b>  | 1607.8540 | 804.4306         | 1606.8700       | 803.9386         | K    | 1143.6753        | 572.3413         | 1126.6488 | 563.8280         | 1125.6648      | 563.3360         | 11 |
| 18 | 1827.0396       | <b>914.0234</b>  | 1810.0130 | <b>905.5102</b>  | 1809.0290       | <b>905.0181</b>  | K    | 959.5541         | 480.2807         | 942.5276  | 471.7674         | 941.5436       | 471.2754         | 10 |
| 19 | 1898.0767       | 949.5420         | 1881.0501 | 941.0287         | 1880.0661       | 940.5367         | A    | 757.3951         | 379.2012         | 740.3686  | 370.6879         | 739.3846       | 370.1959         | 9  |
| 20 | 1969.1138       | <b>985.0605</b>  | 1952.0873 | 976.5473         | 1951.1032       | 976.0553         | A    | <b>686.3580</b>  | 343.6826         | 669.3315  | 335.1694         | 668.3474       | 334.6774         | 8  |
| 21 | 2066.1666       | 1033.5869        | 2049.1400 | 1025.0737        | 2048.1560       | 1024.5816        | P    | <b>615.3209</b>  | 308.1641         | 598.2944  | 299.6508         | 597.3103       | 299.1588         | 7  |
| 22 | 2123.1880       | 1062.0977        | 2106.1615 | 1053.5844        | 2105.1775       | 1053.0924        | G    | 518.2681         | 259.6377         | 501.2416  | 251.1244         | 500.2576       | 250.6324         | 6  |
| 23 | 2194.2252       | 1097.6162        | 2177.1986 | 1089.1029        | 2176.2146       | 1088.6109        | A    | 461.2467         | 231.1270         | 444.2201  | 222.6137         | 443.2361       | 222.1217         | 5  |
| 24 | 2265.2623       | 1133.1348        | 2248.2357 | 1124.6215        | 2247.2517       | 1124.1295        | A    | 390.2096         | 195.6084         | 373.1830  | 187.0951         | 372.1990       | 186.6031         | 4  |
| 25 | 2322.2837       | <b>1161.6455</b> | 2305.2572 | 1153.1322        | 2304.2732       | 1152.6402        | G    | 319.1724         | 160.0899         | 302.1459  | 151.5766         | 301.1619       | 151.0846         | 3  |
| 26 | 2409.3158       | <b>1205.1615</b> | 2392.2892 | 1196.6482        | 2391.3052       | 1196.1562        | S    | 262.1510         | 131.5791         | 245.1244  | 123.0659         | 244.1404       | 122.5738         | 2  |
| 27 |                 |                  |           |                  |                 |                  | R    | 175.1190         | 88.0631          | 158.0924  | 79.5498          |                |                  | 1  |

Match to Query 14545: 2554.211528 from(1278.113040,2+) intensity(57242.3477)

Title: File1365 Spectrum17316 scans: 18289

Data file J:\2013-9-14-A549-Prometh-Fr17-ZW.mgf

Click mouse within plot area to zoom in by factor of two about that point

Or,  300 to  Da Label all possible matches  Label matches used for scoring 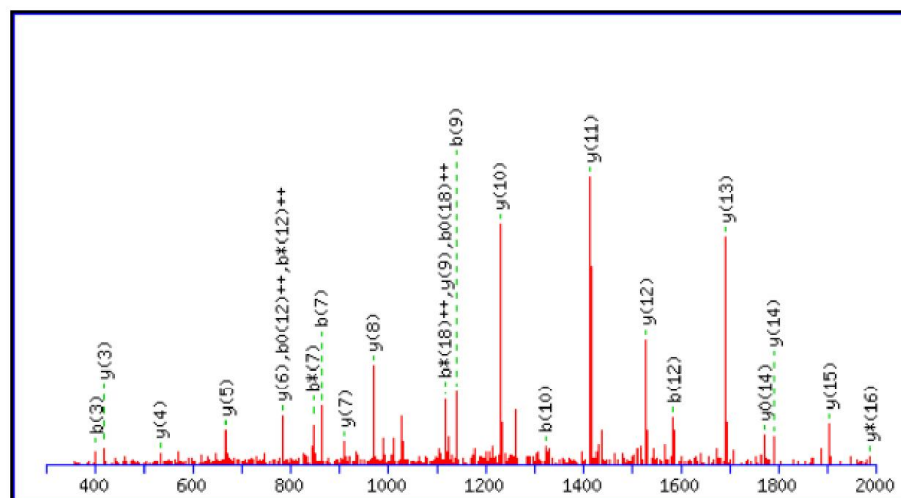

Monoisotopic mass of neutral peptide Mr(calc): 2554.2079

Fixed modifications: Carbamidomethyl (C) (apply to specified residues)

Variable modifications:

K2 : Propionyl-(13CD3)Methyl (K)

K10 : Propionyl (K)

M16 : Label:13C(1)2H(3) (M)

Ions Score: 87 Expect: 7.5e-007

Matches : 25/220 fragment ions using 34 most intense peaks ([help](#))

| #  | b                | b <sup>++</sup> | b <sup>*</sup>  | b <sup>*++</sup> | b <sup>0</sup> | b <sup>0++</sup> | Seq. | y                | y <sup>++</sup> | y <sup>*</sup>   | y <sup>*++</sup> | y <sup>0</sup>   | y <sup>0++</sup> | #  |
|----|------------------|-----------------|-----------------|------------------|----------------|------------------|------|------------------|-----------------|------------------|------------------|------------------|------------------|----|
| 1  | 72.0444          | 36.5258         |                 |                  |                |                  | A    |                  |                 |                  |                  |                  |                  | 20 |
| 2  | 274.2034         | 137.6053        | 257.1769        | 129.0921         |                |                  | K    | 2484.1781        | 1242.5927       | 2467.1515        | 1234.0794        | 2466.1675        | 1233.5874        | 19 |
| 3  | <b>403.2460</b>  | 202.1266        | 386.2194        | 193.6134         | 385.2354       | 193.1214         | E    | 2282.0190        | 1141.5132       | 2264.9925        | 1132.9999        | 2264.0085        | 1132.5079        | 18 |
| 4  | 550.3144         | 275.6608        | 533.2879        | 267.1476         | 532.3038       | 266.6556         | F    | 2152.9764        | 1076.9919       | 2135.9499        | 1068.4786        | 2134.9659        | 1067.9866        | 17 |
| 5  | 651.3621         | 326.1847        | 634.3355        | 317.6714         | 633.3515       | 317.1794         | T    | 2005.9080        | 1003.4577       | <b>1988.8815</b> | 994.9444         | 1987.8975        | 994.4524         | 16 |
| 6  | 765.4050         | 383.2061        | 748.3785        | 374.6929         | 747.3945       | 374.2009         | N    | <b>1904.8604</b> | 952.9338        | 1887.8338        | 944.4205         | 1886.8498        | 943.9285         | 15 |
| 7  | <b>864.4734</b>  | 432.7404        | <b>847.4469</b> | 424.2271         | 846.4629       | 423.7351         | V    | <b>1790.8174</b> | 895.9124        | 1773.7909        | 887.3991         | <b>1772.8069</b> | 886.9071         | 14 |
| 8  | 1027.5368        | 514.2720        | 1010.5102       | 505.7587         | 1009.5262      | 505.2667         | Y    | <b>1691.7490</b> | 846.3781        | 1674.7225        | 837.8649         | 1673.7384        | 837.3729         | 13 |
| 9  | <b>1140.6208</b> | 570.8140        | 1123.5943       | 562.3008         | 1122.6103      | 561.8088         | I    | <b>1528.6857</b> | 764.8465        | 1511.6591        | 756.3332         | 1510.6751        | 755.8412         | 12 |
| 10 | <b>1324.7420</b> | 662.8746        | 1307.7155       | 654.3614         | 1306.7314      | 653.8694         | K    | <b>1415.6016</b> | 708.3044        | 1398.5751        | 699.7912         | 1397.5911        | 699.2992         | 11 |
| 11 | 1438.7849        | 719.8961        | 1421.7584       | 711.3828         | 1420.7744      | 710.8908         | N    | <b>1231.4804</b> | 616.2439        | 1214.4539        | 607.7306         | 1213.4699        | 607.2386         | 10 |
| 12 | <b>1585.8533</b> | 793.4303        | 1568.8268       | <b>784.9170</b>  | 1567.8428      | <b>784.4250</b>  | F    | <b>1117.4375</b> | 559.2224        | 1100.4110        | 550.7091         | 1099.4270        | 550.2171         | 9  |
| 13 | 1642.8748        | 821.9410        | 1625.8483       | 813.4278         | 1624.8642      | 812.9358         | G    | <b>970.3691</b>  | 485.6882        | 953.3426         | 477.1749         | 952.3585         | 476.6829         | 8  |
| 14 | 1771.9174        | 886.4623        | 1754.8909       | 877.9491         | 1753.9068      | 877.4571         | E    | <b>913.3476</b>  | 457.1775        | 896.3211         | 448.6642         | 895.3371         | 448.1722         | 7  |
| 15 | 1886.9443        | 943.9758        | 1869.9178       | 935.4625         | 1868.9338      | 934.9705         | D    | <b>784.3050</b>  | 392.6562        | 767.2785         | 384.1429         | 766.2945         | 383.6509         | 6  |
| 16 | 2022.0070        | 1011.5071       | 2004.9805       | 1002.9939        | 2003.9964      | 1002.5019        | M    | <b>669.2781</b>  | 335.1427        | 652.2516         | 326.6294         | 651.2675         | 326.1374         | 5  |
| 17 | 2137.0340        | 1069.0206       | 2120.0074       | 1060.5073        | 2119.0234      | 1060.0153        | D    | <b>534.2154</b>  | 267.6114        | 517.1889         | 259.0981         | 516.2049         | 258.0661         | 4  |
| 18 | 2252.0609        | 1126.5341       | 2235.0343       | <b>1118.0208</b> | 2234.0503      | <b>1117.5288</b> | B    | <b>419.1885</b>  | 210.0979        | 402.1619         | 201.5846         | 401.1779         | 201.0926         | 3  |
| 19 | 2381.1035        | 1191.0554       | 2364.0769       | 1182.5421        | 2363.0929      | 1182.0501        | E    | 304.1615         | 152.5844        | 287.1350         | 144.0711         | 286.1510         | 143.5791         | 2  |
| 20 |                  |                 |                 |                  |                |                  | R    | 175.1190         | 88.0631         | 158.0924         | 79.5498          |                  |                  | 1  |

Match to Query 6623: 1543.858248 from(772.936400,2+) intensity(9178.1299)

Title: File1359 Spectrum7752 scans: 8391

Data file J:\2013-9-14-A549-Prometh-Fr7-ZW.mgf

Click mouse within plot area to zoom in by factor of two about that point

Or,  200  1600 Da Label all possible matches  Label matches used for scoring 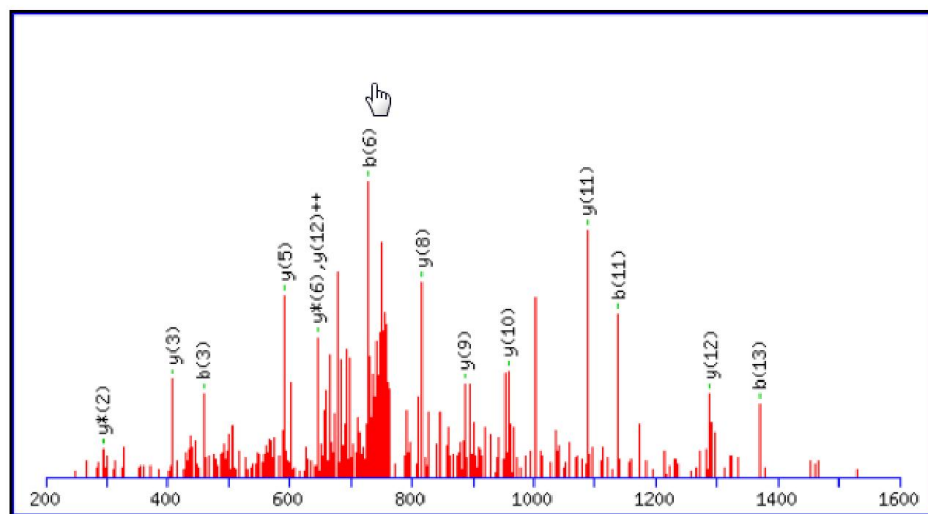

Monoisotopic mass of neutral peptide Mr(calc): 1543.8573

Fixed modifications: Carbamidomethyl (C) (apply to specified residues or termini only)

Variable modifications:

K1 : Propionyl (K)

K3 : Propionyl-(13CD3)Methyl (K)

M13 : Label:13C(1)2H(3) (M)

Ions Score: 35 Expect: 0.17

Matches : 14/144 fragment ions using 26 most intense peaks ([help](#))

| #  | b                | b <sup>++</sup> | b <sup>*</sup> | b <sup>*++</sup> | b <sup>0</sup> | b <sup>0++</sup> | Seq. | y                | y <sup>++</sup> | y <sup>*</sup>  | y <sup>*++</sup> | y <sup>0</sup> | y <sup>0++</sup> | #  |
|----|------------------|-----------------|----------------|------------------|----------------|------------------|------|------------------|-----------------|-----------------|------------------|----------------|------------------|----|
| 1  | 185.1285         | 93.0679         | 168.1019       | 84.5546          |                |                  | K    |                  |                 |                 |                  |                |                  | 14 |
| 2  | 256.1656         | 128.5864        | 239.1390       | 120.0731         |                |                  | A    | 1360.7435        | 680.8754        | 1343.7169       | 672.3621         | 1342.7329      | 671.8701         | 13 |
| 3  | <b>458.3246</b>  | 229.6659        | 441.2980       | 221.1527         |                |                  | K    | <b>1289.7064</b> | <b>645.3568</b> | 1272.6798       | 636.8435         | 1271.6958      | 636.3515         | 12 |
| 4  | 587.3672         | 294.1872        | 570.3406       | 285.6740         | 569.3566       | 285.1819         | E    | <b>1087.5473</b> | 544.2773        | 1070.5208       | 535.7640         | 1069.5368      | 535.2720         | 11 |
| 5  | 658.4043         | 329.7058        | 641.3777       | 321.1925         | 640.3937       | 320.7005         | A    | <b>958.5047</b>  | 479.7560        | 941.4782        | 471.2427         | 940.4942       | 470.7507         | 10 |
| 6  | <b>729.4414</b>  | 365.2243        | 712.4149       | 356.7111         | 711.4308       | 356.2191         | A    | <b>887.4676</b>  | 444.2375        | 870.4411        | 435.7242         | 869.4571       | 435.2322         | 9  |
| 7  | 786.4629         | 393.7351        | 769.4363       | 385.2218         | 768.4523       | 384.7298         | G    | <b>816.4305</b>  | 408.7189        | 799.4040        | 400.2056         | 798.4200       | 399.7136         | 8  |
| 8  | 883.5156         | 442.2615        | 866.4891       | 433.7482         | 865.5051       | 433.2562         | P    | 759.4091         | 380.2082        | 742.3825        | 371.6949         | 741.3985       | 371.2029         | 7  |
| 9  | 954.5527         | 477.7800        | 937.5262       | 469.2667         | 936.5422       | 468.7747         | A    | 662.3563         | 331.6818        | <b>645.3297</b> | 323.1685         | 644.3457       | 322.6765         | 6  |
| 10 | 1051.6055        | 526.3064        | 1034.5790      | 517.7931         | 1033.5949      | 517.3011         | P    | <b>591.3192</b>  | 296.1632        | 574.2926        | 287.6500         | 573.3086       | 287.1579         | 5  |
| 11 | <b>1138.6375</b> | 569.8224        | 1121.6110      | 561.3091         | 1120.6270      | 560.8171         | S    | 494.2664         | 247.6368        | 477.2399        | 239.1236         | 476.2558       | 238.6316         | 4  |
| 12 | 1235.6903        | 618.3488        | 1218.6638      | 609.8355         | 1217.6797      | 609.3435         | P    | <b>407.2344</b>  | 204.1208        | 390.2078        | 195.6076         |                |                  | 3  |
| 13 | <b>1370.7530</b> | 685.8801        | 1353.7264      | 677.3668         | 1352.7424      | 676.8748         | M    | 310.1816         | 155.5944        | <b>293.1551</b> | 147.0812         |                |                  | 2  |
| 14 |                  |                 |                |                  |                |                  | R    | 175.1190         | 88.0631         | 158.0924        | 79.5498          |                |                  | 1  |

Match to Query 9203: 1708.859708 from(855.437130,2+) intensity(8724.8760)

Title: File1356 Spectrum12268 scans: 13111

Data file J:\2013-9-14-A549-Prometh-Fr3-ZW.mgf

Click mouse within plot area to zoom in by factor of two about that point

Or,   to  Da Label all possible matches  Label matches used for scoring 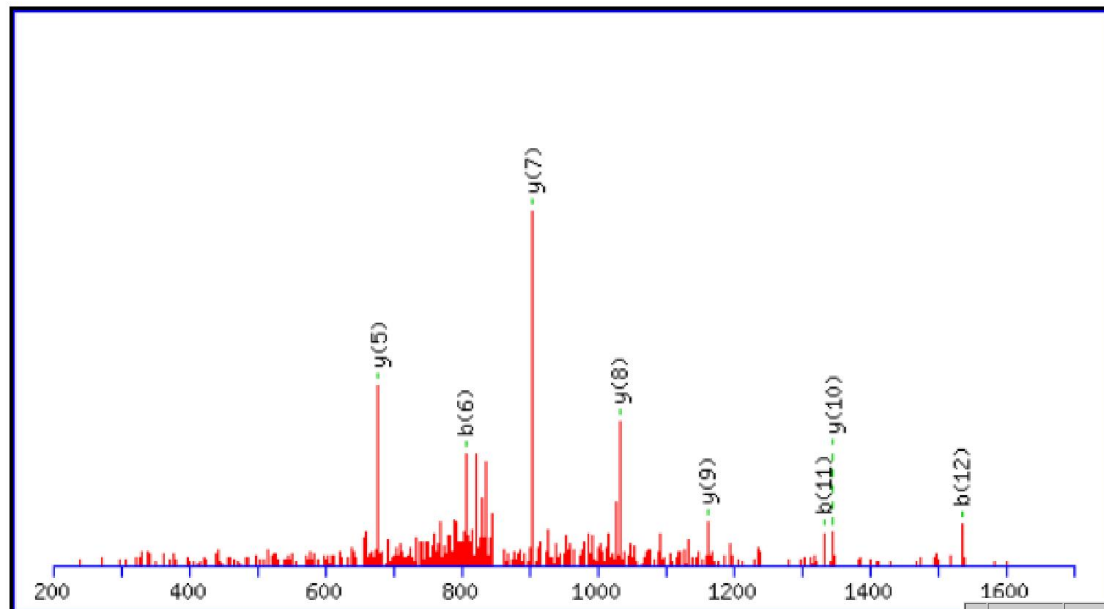

Monoisotopic mass of neutral peptide Mr(calc): 1708.8581

Fixed modifications: Carbamidomethyl (C) (apply to specified resi

Variable modifications:

K4 : Propionyl (K)

K12 : Propionyl-(13CD3)Methyl (K)

Ions Score: 27 Expect: 0.93

Matches : 8/128 fragment ions using 14 most intense peaks ([help](#))

| #  | b                | b <sup>++</sup> | b <sup>*</sup> | b <sup>++</sup> | b <sup>0</sup> | b <sup>0++</sup> | Seq. | y                | y <sup>++</sup> | y <sup>*</sup> | y <sup>++</sup> | y <sup>0</sup> | y <sup>0++</sup> | #  |
|----|------------------|-----------------|----------------|-----------------|----------------|------------------|------|------------------|-----------------|----------------|-----------------|----------------|------------------|----|
| 1  | 102.0550         | 51.5311         |                |                 | 84.0444        | 42.5258          | T    |                  |                 |                |                 |                |                  | 13 |
| 2  | 217.0819         | 109.0446        |                |                 | 199.0713       | 100.0393         | D    | 1608.8177        | 804.9125        | 1591.7911      | 796.3992        | 1590.8071      | 795.9072         | 12 |
| 3  | 364.1503         | 182.5788        |                |                 | 346.1397       | 173.5735         | F    | 1493.7907        | 747.3990        | 1476.7642      | 738.8857        | 1475.7802      | 738.3937         | 11 |
| 4  | 548.2715         | 274.6394        | 581.2449       | 266.1261        | 530.2609       | 265.6341         | K    | <b>1346.7223</b> | 673.8648        | 1329.6958      | 665.3515        | 1328.7118      | 664.8595         | 10 |
| 5  | 677.3141         | 339.1607        | 660.2875       | 330.6474        | 659.3035       | 330.1554         | E    | <b>1162.6012</b> | 581.8042        | 1145.5746      | 573.2909        | 1144.5906      | 572.7989         | 9  |
| 6  | <b>806.3567</b>  | 403.6820        | 789.3301       | 395.1687        | 788.3461       | 394.6767         | E    | <b>1033.5586</b> | 517.2829        | 1016.5320      | 508.7696        | 1015.5480      | 508.2776         | 8  |
| 7  | 903.4094         | 452.2084        | 886.3829       | 443.6951        | 885.3989       | 443.2031         | P    | <b>904.5160</b>  | 452.7616        | 887.4894       | 444.2483        | 886.5054       | 443.7563         | 7  |
| 8  | 1032.4520        | 516.7297        | 1015.4255      | 508.2164        | 1014.4415      | 507.7244         | E    | 807.4632         | 404.2352        | 790.4367       | 395.7220        | 789.4526       | 395.2300         | 6  |
| 9  | 1129.5048        | 565.2560        | 1112.4782      | 556.7428        | 1111.4942      | 556.2508         | P    | <b>678.4206</b>  | 339.7139        | 661.3941       | 331.2007        |                |                  | 5  |
| 10 | 1186.5263        | 593.7668        | 1169.4997      | 585.2535        | 1168.5157      | 584.7615         | G    | 581.3678         | 291.1876        | 564.3413       | 282.6743        |                |                  | 4  |
| 11 | <b>1333.5947</b> | 667.3010        | 1316.5681      | 658.7877        | 1315.5841      | 658.2957         | F    | 524.3464         | 262.6768        | 507.3198       | 254.1636        |                |                  | 3  |
| 12 | <b>1535.7537</b> | 768.3805        | 1518.7271      | 759.8672        | 1517.7431      | 759.3752         | K    | 377.2780         | 189.1426        | 360.2514       | 180.6293        |                |                  | 2  |
| 13 |                  |                 |                |                 |                |                  | R    | 175.1190         | 88.0631         | 158.0924       | 79.5498         |                |                  | 1  |

Match to Query 21814: 3751.020402 from(1251.347410,3+) intensity(0.0000)  
Title: File1356 Spectrum21313 scans: 22641  
Data file J:\2013-9-14-A549-Prometh-Fr3-ZW.mgf

Click mouse within plot area to zoom in by factor of two about that point  
Or,  to  Da   
Label all possible matches  Label matches used for scoring

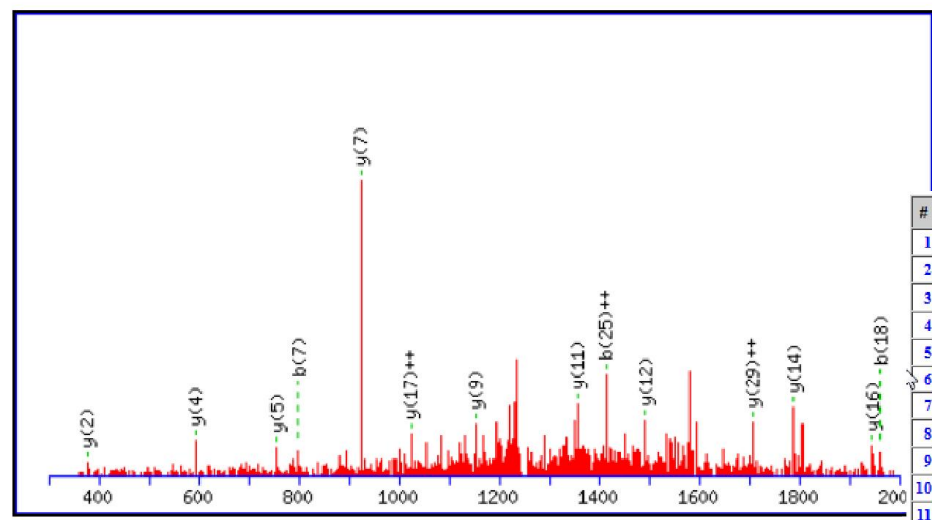

Monoisotopic mass of neutral peptide Mr(calc): 3750.0095  
Fixed modifications: Carbamidomethyl (C) (apply to specified residues or  
Variable modifications:  
K12 : Propionyl (K)  
K20 : Propionyl (K)  
M21 : Label:13C(1)2H(3) (M)  
K31 : Propionyl-(13CD3)Methyl (K)  
Ions Score: 56 Expect: 0.0014  
Matches : 14/346 fragment ions using 17 most intense peaks (help)

| #  | b         | b <sup>++</sup> | b <sup>+</sup> | b <sup>+++</sup> | b <sup>0</sup> | b <sup>0++</sup> | Seq. | y         | y <sup>++</sup> | y <sup>+</sup> | y <sup>+++</sup> | y <sup>0</sup> | y <sup>0++</sup> | #  |
|----|-----------|-----------------|----------------|------------------|----------------|------------------|------|-----------|-----------------|----------------|------------------|----------------|------------------|----|
| 1  | 130.0499  | 65.5286         |                |                  | 112.0393       | 56.5233          | E    |           |                 |                |                  |                |                  | 32 |
| 2  | 267.1088  | 134.0580        |                |                  | 249.0982       | 125.0527         | H    | 3621.9742 | 1811.4907       | 3604.9477      | 1802.9775        | 3603.9636      | 1802.4855        | 31 |
| 3  | 338.1459  | 169.5766        |                |                  | 320.1353       | 160.5713         | A    | 3484.9153 | 1742.9613       | 3467.8887      | 1734.4480        | 3466.9047      | 1733.9560        | 30 |
| 4  | 451.2300  | 226.1186        |                |                  | 433.2194       | 217.1133         | L    | 3413.8782 | 1707.4427       | 3396.8516      | 1698.9295        | 3395.8676      | 1698.4374        | 29 |
| 5  | 564.3140  | 282.6606        |                |                  | 546.3035       | 273.6554         | L    | 3300.7941 | 1650.9007       | 3283.7676      | 1642.3874        | 3282.7835      | 1641.8954        | 28 |
| 6  | 635.3511  | 318.1792        |                |                  | 617.3406       | 309.1739         | A    | 3187.7101 | 1594.3587       | 3170.6835      | 1585.8454        | 3169.6995      | 1585.3534        | 27 |
| 7  | 798.4145  | 399.7109        |                |                  | 780.4039       | 390.7056         | Y    | 3116.6729 | 1558.8401       | 3099.6464      | 1550.3268        | 3098.6624      | 1549.8348        | 26 |
| 8  | 899.4621  | 450.2347        |                |                  | 881.4516       | 441.2294         | T    | 2953.6096 | 1477.3084       | 2936.5831      | 1468.7952        | 2935.5990      | 1468.3032        | 25 |
| 9  | 1012.5462 | 506.7767        |                |                  | 994.5356       | 497.7715         | L    | 2852.5619 | 1426.7846       | 2835.5354      | 1418.2713        | 2834.5514      | 1417.7793        | 24 |
| 10 | 1069.5677 | 535.2875        |                |                  | 1051.5571      | 526.2822         | G    | 2739.4779 | 1370.2426       | 2722.4513      | 1361.7293        | 2721.4673      | 1361.2373        | 23 |
| 11 | 1168.6361 | 584.8217        |                |                  | 1150.6255      | 575.8164         | V    | 2682.4564 | 1341.7318       | 2665.4299      | 1333.2186        | 2664.4458      | 1332.7266        | 22 |
| 12 | 1352.7573 | 676.8823        | 1335.7307      | 668.3690         | 1334.7467      | 667.8770         | K    | 2583.3880 | 1292.1976       | 2566.3614      | 1283.6844        | 2565.3774      | 1283.1923        | 21 |
| 13 | 1480.8158 | 740.9116        | 1463.7893      | 732.3983         | 1462.8053      | 731.9063         | Q    | 2399.2668 | 1200.1370       | 2382.2403      | 1191.6238        | 2381.2562      | 1191.1318        | 20 |
| 14 | 1593.8999 | 797.4536        | 1576.8734      | 788.9403         | 1575.8893      | 788.4483         | L    | 2271.2082 | 1136.1078       | 2254.1817      | 1127.5945        | 2253.1977      | 1127.1025        | 19 |
| 15 | 1706.9840 | 853.9956        | 1689.9574      | 845.4823         | 1688.9734      | 844.9903         | I    | 2158.1242 | 1079.5657       | 2141.0976      | 1071.0524        | 2140.1136      | 1070.5604        | 18 |
| 16 | 1806.0524 | 903.5298        | 1789.0258      | 895.0166         | 1788.0418      | 894.5245         | V    | 2045.0401 | 1023.0237       | 2028.0136      | 1014.5104        | 2027.0295      | 1014.0184        | 17 |
| 17 | 1863.0738 | 932.0406        | 1846.0473      | 923.5273         | 1845.0633      | 923.0353         | G    | 1945.9717 | 973.4895        | 1928.9451      | 964.9762         | 1927.9611      | 964.4842         | 16 |
| 18 | 1962.1423 | 981.5748        | 1945.1157      | 973.0615         | 1944.1317      | 972.5695         | V    | 1888.9502 | 944.9788        | 1871.9237      | 936.4655         | 1870.9397      | 935.9735         | 15 |
| 19 | 2076.1852 | 1038.5962       | 2059.1586      | 1030.0830        | 2058.1746      | 1029.5910        | N    | 1789.8818 | 895.4445        | 1772.8533      | 886.9313         | 1771.8712      | 886.4393         | 14 |
| 20 | 2260.3064 | 1130.6568       | 2243.2798      | 1122.1435        | 2242.2958      | 1121.6515        | K    | 1675.8389 | 838.4231        | 1658.8123      | 829.9098         | 1657.8283      | 829.4178         | 13 |
| 21 | 2395.3690 | 1198.1882       | 2378.3425      | 1189.6749        | 2377.3385      | 1189.1829        | M    | 1491.7177 | 746.3625        | 1474.6912      | 737.8492         | 1473.7071      | 737.3572         | 12 |
| 22 | 2510.3960 | 1255.7016       | 2493.3694      | 1247.1884        | 2492.3854      | 1246.6963        | D    | 1356.6550 | 678.8312        | 1339.6285      | 670.3179         | 1338.6445      | 669.8259         | 11 |
| 23 | 2597.4280 | 1299.2176       | 2580.4015      | 1290.7044        | 2579.4174      | 1290.2124        | S    | 1241.6281 | 621.3177        | 1224.6015      | 612.8044         | 1223.6175      | 612.3124         | 10 |
| 24 | 2698.4757 | 1349.7415       | 2681.4491      | 1341.2282        | 2680.4651      | 1340.7362        | T    | 1154.5961 | 577.8017        | 1137.5695      | 569.2884         | 1136.5855      | 568.7964         | 9  |
| 25 | 2827.5183 | 1414.2628       | 2810.4917      | 1405.7495        | 2809.5077      | 1405.2575        | E    | 1053.5484 | 527.2778        | 1036.5218      | 518.7646         | 1035.5378      | 518.2725         | 8  |
| 26 | 2924.5710 | 1462.7892       | 2907.5445      | 1454.2759        | 2906.5605      | 1453.7839        | P    | 924.5058  | 462.7565        | 907.4792       | 454.2433         | 906.4952       | 453.7513         | 7  |
| 27 | 2995.6082 | 1498.3077       | 2978.5816      | 1489.7944        | 2977.5976      | 1489.3024        | A    | 827.4530  | 414.2302        | 810.4265       | 405.7169         | 809.4425       | 405.2249         | 6  |
| 28 | 3158.6715 | 1579.8394       | 3141.6449      | 1571.3261        | 3140.6609      | 1570.8341        | Y    | 756.4159  | 378.7116        | 739.3894       | 370.1983         | 738.4054       | 369.7063         | 5  |
| 29 | 3245.7035 | 1623.3554       | 3228.6770      | 1614.8421        | 3227.6930      | 1614.3501        | S    | 593.3526  | 297.1799        | 576.3260       | 288.6667         | 575.3420       | 288.1746         | 4  |
| 30 | 3374.7461 | 1687.8767       | 3357.7196      | 1679.3634        | 3356.7355      | 1678.8714        | E    | 506.3206  | 253.6639        | 489.2940       | 245.1506         | 488.3100       | 244.6586         | 3  |
| 31 | 3576.9051 | 1788.9562       | 3559.8786      | 1780.4429        | 3558.8946      | 1779.9509        | K    | 377.2780  | 189.1426        | 360.2514       | 180.6293         |                |                  | 2  |
| 32 |           |                 |                |                  |                |                  | R    | 175.1190  | 88.0631         | 158.0924       | 79.5498          |                |                  | 1  |



Found in **Q9Y6X9**, MORC family CW-type zinc finger protein 2 OS=Homo sapiens GN=MORC2 PE=1 SV=2

Match to Query 6421: 1414.842128 from(708.428340,2+) intensity(52117.8945)

Title: File1347 Spectrum8753 scans: 9724

Data file J:\2013-9-14-A549-Prometh-Fr15-ZW.mgf

Click mouse within plot area to zoom in by factor of two about that point

Or,  200 to  Da Label all possible matches  Label matches used for scoring 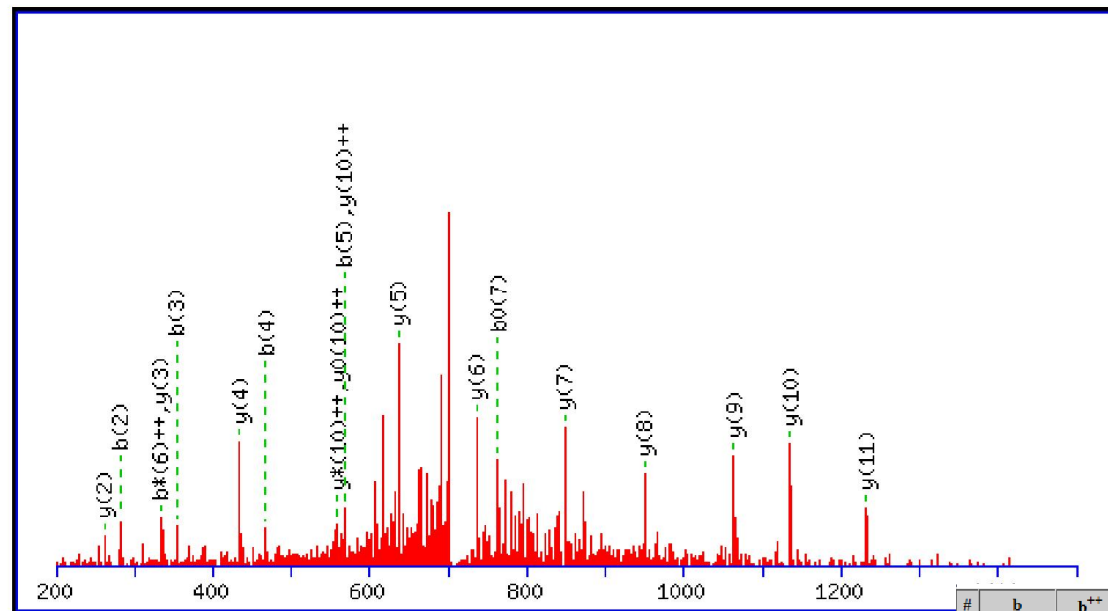

Monoisotopic mass of neutral peptide Mr(calc): 1414.8416

Fixed modifications: Carbamidomethyl (C) (apply to specific)

Variable modifications:

K1 : Propionyl (K)

K8 : Propionyl-(13CD3)Methyl (K)

Ions Score: 80 Expect: 3.4e-006

Matches : 19/122 fragment ions using 26 most intense peaks

| #  | b               | b <sup>++</sup> | b <sup>+</sup> | b <sup>+++</sup> | b <sup>0</sup>  | b <sup>0++</sup> | Seq. | y                | y <sup>++</sup> | y <sup>+</sup> | y <sup>+++</sup> | y <sup>0</sup> | y <sup>0++</sup> | #  |
|----|-----------------|-----------------|----------------|------------------|-----------------|------------------|------|------------------|-----------------|----------------|------------------|----------------|------------------|----|
| 1  | 185.1285        | 93.0679         | 168.1019       | 84.5546          |                 |                  | K    |                  |                 |                |                  |                |                  | 12 |
| 2  | <b>282.1812</b> | 141.5942        | 265.1547       | 133.0810         |                 |                  | P    | <b>1231.7277</b> | 616.3675        | 1214.7012      | 607.8542         | 1213.7172      | 607.3622         | 11 |
| 3  | <b>353.2183</b> | 177.1128        | 336.1918       | 168.5995         |                 |                  | A    | <b>1134.6750</b> | <b>567.8411</b> | 1117.6484      | <b>559.3279</b>  | 1116.6644      | <b>558.8358</b>  | 10 |
| 4  | <b>467.2613</b> | 234.1343        | 450.2347       | 225.6210         |                 |                  | N    | <b>1063.6379</b> | 532.3226        | 1046.6113      | 523.8093         | 1045.6273      | 523.3173         | 9  |
| 5  | <b>568.3089</b> | 284.6581        | 551.2824       | 276.1448         | 550.2984        | 275.6528         | T    | <b>949.5949</b>  | 475.3011        | 932.5684       | 466.7878         | 931.5844       | 466.2958         | 8  |
| 6  | 681.3930        | 341.2001        | 664.3665       | <b>332.6869</b>  | 663.3824        | 332.1949         | L    | <b>848.5473</b>  | 424.7773        | 831.5207       | 416.2640         | 830.5367       | 415.7720         | 7  |
| 7  | 780.4614        | 390.7343        | 763.4349       | 382.2211         | <b>762.4509</b> | 381.7291         | V    | <b>735.4632</b>  | 368.2352        | 718.4367       | 359.7220         | 717.4526       | 359.2300         | 6  |
| 8  | 982.6204        | 491.8139        | 965.5939       | 483.3006         | 964.6099        | 482.8086         | K    | <b>636.3948</b>  | 318.7010        | 619.3682       | 310.1878         | 618.3842       | 309.6957         | 5  |
| 9  | 1083.6681       | 542.3377        | 1066.6416      | 533.8244         | 1065.6575       | 533.3324         | T    | <b>434.2358</b>  | 217.6215        | 417.2092       | 209.1082         | 416.2252       | 208.6162         | 4  |
| 10 | 1154.7052       | 577.8562        | 1137.6787      | 569.3430         | 1136.6947       | 568.8510         | A    | <b>333.1881</b>  | 167.0977        | 316.1615       | 158.5844         | 315.1775       | 158.0924         | 3  |
| 11 | 1241.7372       | 621.3723        | 1224.7107      | 612.8590         | 1223.7267       | 612.3670         | S    | <b>262.1510</b>  | 131.5791        | 245.1244       | 123.0659         | 244.1404       | 122.5738         | 2  |
| 12 |                 |                 |                |                  |                 |                  | R    | 175.1190         | 88.0631         | 158.0924       | 79.5498          |                |                  | 1  |

Match to Query 940: 855.429968 from(428.722260,2+) intensity(39575.7109)

Title: File1344 Spectrum2396 scans: 3288

Data file I:\2013-9-14-A549-Prometh-Fr12-ZW.mgf

Click mouse within plot area to zoom in by factor of two about that point

Or,   to  Da Label all possible matches  Label matches used for scoring 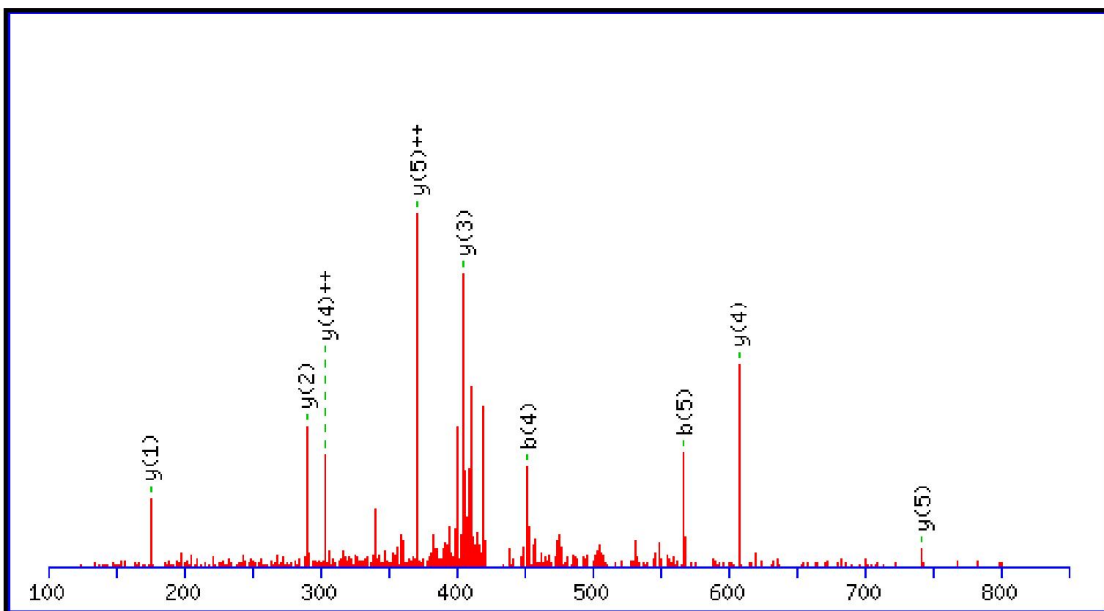

Monoisotopic mass of neutral peptide Mr(calc): 855.4302

Fixed modifications: Carbamidomethyl (C) (apply to specified)

Variable modifications:

M3 : Label:13C(1)2H(3) (M)

K4 : Propionyl-(13CD3)Methyl (K)

Ions Score: 37 Expect: 0.028

Matches : 9/56 fragment ions using 14 most intense peaks

| # | b               | b <sup>++</sup> | b <sup>+</sup> | b <sup>+++</sup> | b <sup>0</sup> | b <sup>0++</sup> | Seq. | y               | y <sup>++</sup> | y <sup>+</sup> | y <sup>+++</sup> | y <sup>0</sup> | y <sup>0++</sup> | # |
|---|-----------------|-----------------|----------------|------------------|----------------|------------------|------|-----------------|-----------------|----------------|------------------|----------------|------------------|---|
| 1 | 58.0287         | 29.5180         |                |                  |                |                  | G    |                 |                 |                |                  |                |                  | 7 |
| 2 | 115.0502        | 58.0287         |                |                  |                |                  | G    | 799.4160        | 400.2116        | 782.3894       | 391.6984         | 781.4054       | 391.2063         | 6 |
| 3 | 250.1129        | 125.5601        |                |                  |                |                  | M    | <b>742.3945</b> | <b>371.7009</b> | 725.3680       | 363.1876         | 724.3840       | 362.6956         | 5 |
| 4 | <b>452.2719</b> | 226.6396        | 435.2453       | 218.1263         |                |                  | K    | <b>607.3319</b> | <b>304.1696</b> | 590.3053       | 295.6563         | 589.3213       | 295.1643         | 4 |
| 5 | <b>567.2988</b> | 284.1531        | 550.2723       | 275.6398         | 549.2883       | 275.1478         | D    | <b>405.1728</b> | 203.0901        | 388.1463       | 194.5768         | 387.1623       | 194.0848         | 3 |
| 6 | 682.3258        | 341.6665        | 665.2992       | 333.1533         | 664.3152       | 332.6612         | D    | <b>290.1459</b> | 145.5766        | 273.1193       | 137.0633         | 272.1353       | 136.5713         | 2 |
| 7 |                 |                 |                |                  |                |                  | R    | <b>175.1190</b> | 88.0631         | 158.0924       | 79.5498          |                |                  | 1 |

MS/MS Fragmentation of **AASRKPPR**

Found in **G8JLB2**, Xaa-Pro aminopeptidase 1 OS=Homo sapiens GN=XPNPEP1 PE=2 SV=1

Match to Query 3153: 997.594508 from(499.804530,2+) intensity(10987.7412)

Title: File2136 Spectrum471 scans: 1084

Data file I:\2013-12-03-SIMM7721-FR1-10-ZW.mgf

Click mouse within plot area to zoom in by factor of two about that point

Or,   to  Da

Label all possible matches  Label matches used for scoring

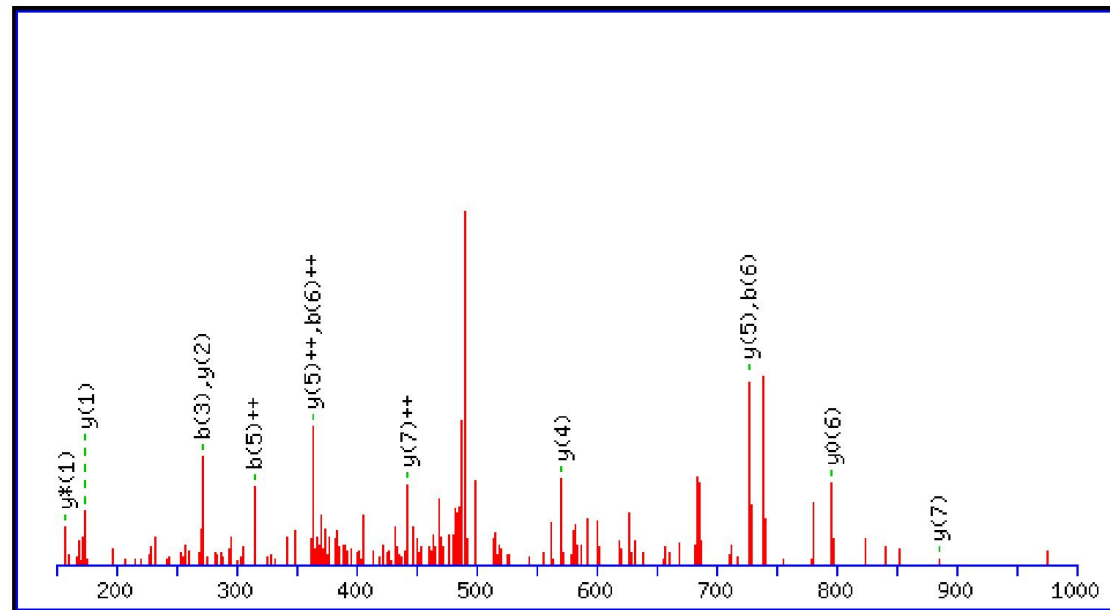

**Monoisotopic mass of neutral peptide Mr(calc):** 997.5941

**Fixed modifications:** Carbamidomethyl (C) (apply to specified residues or termini only)

**Variable modifications:**

**N-term :** Acetyl (Protein N-term)

**K5 :** Propionyl-(13CD3)Methyl (K)

**Ions Score:** 34 **Expect:** 0.11

**Matches :** 13/64 fragment ions using 16 most intense peaks

| # | b               | b <sup>++</sup> | b <sup>+</sup> | b <sup>++</sup> | b <sup>0</sup> | b <sup>0++</sup> | Seq. | y               | y <sup>++</sup> | y <sup>+</sup>  | y <sup>++</sup> | y <sup>0</sup>  | y <sup>0++</sup> | # |
|---|-----------------|-----------------|----------------|-----------------|----------------|------------------|------|-----------------|-----------------|-----------------|-----------------|-----------------|------------------|---|
| 1 | 114.0550        | 57.5311         |                |                 |                |                  | A    |                 |                 |                 |                 |                 |                  | 8 |
| 2 | 185.0921        | 93.0497         |                |                 |                |                  | A    | <b>885.5537</b> | <b>443.2805</b> | 868.5272        | 434.7672        | 867.5432        | 434.2752         | 7 |
| 3 | <b>272.1241</b> | 136.5657        |                |                 | 254.1135       | 127.5604         | S    | 814.5166        | 407.7620        | 797.4901        | 399.2487        | <b>796.5061</b> | 398.7567         | 6 |
| 4 | 428.2252        | 214.6162        | 411.1987       | 206.1030        | 410.2146       | 205.6110         | R    | <b>727.4846</b> | <b>364.2459</b> | 710.4581        | 355.7327        |                 |                  | 5 |
| 5 | 630.3842        | <b>315.6957</b> | 613.3577       | 307.1825        | 612.3737       | 306.6905         | K    | <b>571.3835</b> | 286.1954        | 554.3569        | 277.6821        |                 |                  | 4 |
| 6 | <b>727.4370</b> | <b>364.2221</b> | 710.4104       | 355.7089        | 709.4264       | 355.2168         | P    | 369.2245        | 185.1159        | 352.1979        | 176.6026        |                 |                  | 3 |
| 7 | 824.4897        | 412.7485        | 807.4632       | 404.2352        | 806.4792       | 403.7432         | P    | <b>372.1717</b> | 136.5895        | 255.1452        | 128.0762        |                 |                  | 2 |
| 8 |                 |                 |                |                 |                |                  | R    | <b>175.1190</b> | 88.0631         | <b>158.0924</b> | 79.5498         |                 |                  | 1 |

MS/MS Fragmentation of **QSGNTEQKSKSKQHR**

Found in **A9IYQ1**, Sister chromatid cohesion protein PDS5 homolog B (Fragment) OS=Homo sapiens GN=PDS5B PE=2 SV=1 **332**

Match to Query 12808: 1927.997652 from(643.673160, 3+) intensity(30005.7617)

Title: File2136 Spectrum3681 scans: 4551

Data file I:\2013-12-03-SIMM7721-FR1-10-ZW.mgf

Click mouse within plot area to zoom in by factor of two about that point

Or,   to  Da

Label all possible matches  Label matches used for scoring

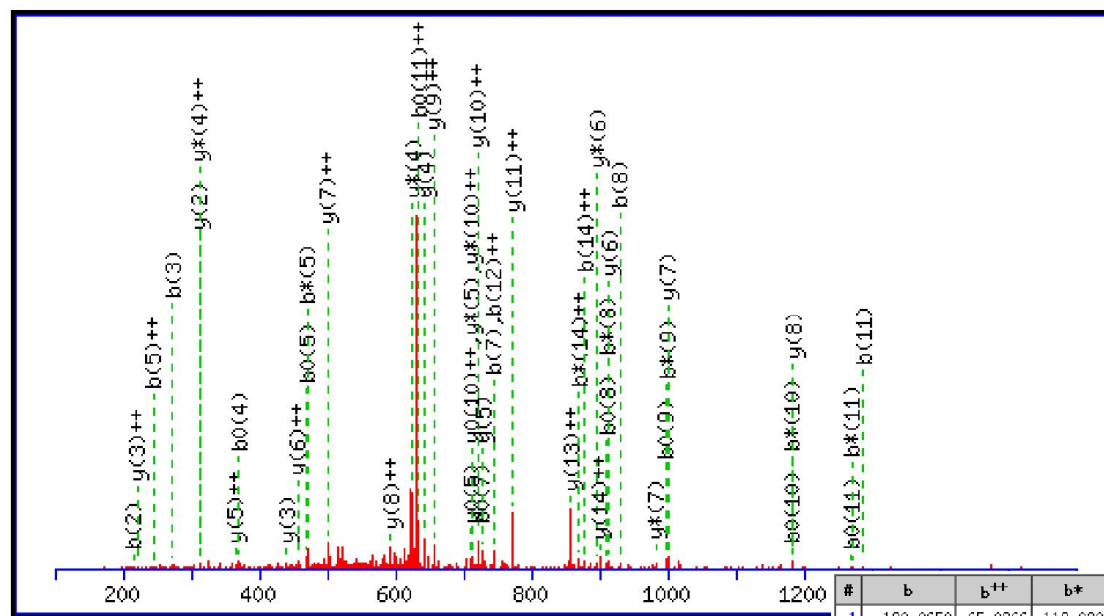

**Monoisotopic mass of neutral peptide Mr(calc): 1927.**

**Fixed modifications:** Carbamidomethyl (C) (apply to speci

**Variable modifications:**

**K8** : Propionyl (K)

**K10** : Propionyl (K)

**K12** : Propionyl-(13CD3)Methyl (K)

**Ions Score: 34 Expect: 0.25**

**Matches : 47/158 fragment ions using 103 most intense pea**

| #  | b                | b <sup>++</sup> | b*               | b <sup>***</sup> | b <sup>0</sup>   | b <sup>0++</sup> | Seq. | y                | y <sup>++</sup> | y*              | y <sup>***</sup> | y <sup>0</sup>  | y <sup>0++</sup> | #  |
|----|------------------|-----------------|------------------|------------------|------------------|------------------|------|------------------|-----------------|-----------------|------------------|-----------------|------------------|----|
| 1  | 129.0659         | 65.0366         | 112.0393         | 56.5233          |                  |                  | Q    |                  |                 |                 |                  |                 |                  | 15 |
| 2  | <b>216.0979</b>  | 108.5526        | 199.0713         | 100.0393         | 198.0873         | 99.5473          | S    | 1800.9471        | <b>900.9772</b> | 1783.9206       | 892.4639         | 1782.9366       | 891.9719         | 14 |
| 3  | <b>273.1193</b>  | 137.0633        | 256.0928         | 128.5500         | 255.1088         | 128.0580         | G    | 1713.9151        | <b>857.4612</b> | 1696.8886       | 848.9479         | 1695.9045       | 848.4559         | 13 |
| 4  | 387.1623         | 194.0848        | 370.1857         | 185.5715         | <b>369.1517</b>  | 185.0795         | N    | 1656.8936        | 828.9505        | 1639.8671       | 820.4372         | 1638.8831       | 819.9452         | 12 |
| 5  | 488.2100         | <b>244.6086</b> | <b>471.1834</b>  | 236.0953         | <b>470.1994</b>  | 235.6033         | T    | 1542.8507        | <b>771.9290</b> | 1525.8242       | 763.4157         | 1524.8402       | 762.9237         | 11 |
| 6  | 617.2525         | 309.1299        | 600.2260         | 300.6166         | 599.2420         | 300.1246         | E    | 1441.8030        | <b>721.4052</b> | 1424.7765       | <b>712.8919</b>  | 1423.7925       | <b>712.3999</b>  | 10 |
| 7  | <b>745.3111</b>  | 373.1592        | 728.2846         | 364.6459         | <b>727.3006</b>  | 364.1539         | Q    | 1312.7604        | <b>656.8839</b> | 1295.7339       | 648.3706         | 1294.7499       | 647.8786         | 9  |
| 8  | <b>929.4323</b>  | 465.2198        | <b>912.4058</b>  | 456.7065         | <b>911.4217</b>  | 456.2145         | K    | <b>1184.7019</b> | <b>592.8546</b> | 1167.6753       | 584.3413         | 1166.6913       | 583.8493         | 8  |
| 9  | 1016.4643        | 508.7358        | <b>999.4378</b>  | 500.2225         | <b>998.4538</b>  | 499.7305         | S    | <b>1000.5807</b> | <b>500.7940</b> | <b>983.5541</b> | 492.2807         | 982.5701        | 491.7887         | 7  |
| 10 | 1200.5855        | 600.7964        | <b>1183.5590</b> | 592.2831         | <b>1182.5749</b> | 591.7911         | K    | <b>913.5487</b>  | <b>457.2780</b> | <b>896.5221</b> | 448.7647         | 895.5381        | 448.2727         | 6  |
| 11 | <b>1287.6175</b> | 644.3124        | <b>1270.5910</b> | 635.7991         | <b>1269.6070</b> | <b>635.8071</b>  | S    | <b>729.4275</b>  | <b>365.2174</b> | <b>712.4009</b> | 356.7041         | <b>711.4169</b> | 356.2121         | 5  |
| 12 | 1489.7765        | <b>745.3919</b> | 1472.7500        | 736.8786         | 1471.7660        | 736.3866         | K    | <b>642.3955</b>  | 321.7014        | <b>625.3689</b> | <b>313.1881</b>  |                 |                  | 4  |
| 13 | 1617.8351        | 809.4212        | 1600.8086        | 800.9079         | 1599.8246        | 800.4159         | Q    | <b>440.2364</b>  | <b>220.6219</b> | 423.2099        | 212.1086         |                 |                  | 3  |
| 14 | 1754.8940        | <b>877.9507</b> | 1737.8675        | <b>869.4374</b>  | 1736.8835        | 868.9454         | H    | <b>312.1779</b>  | 156.5926        | 295.1513        | 148.0793         |                 |                  | 2  |
| 15 |                  |                 |                  |                  |                  |                  | R    | 175.1190         | 88.0631         | 158.0924        | 79.5498          |                 |                  | 1  |

Match to Query 6763: 1259.711648 from(630.863100, 2+) intensity(9468.4912)

Title: File2136 Spectrum4390 scans: 5310

Data file I:\2013-12-03-SIMM7721-FR1-10-ZW.mgf

Click mouse within plot area to zoom in by factor of two about that point

Or,   to  Da Label all possible matches  Label matches used for scoring 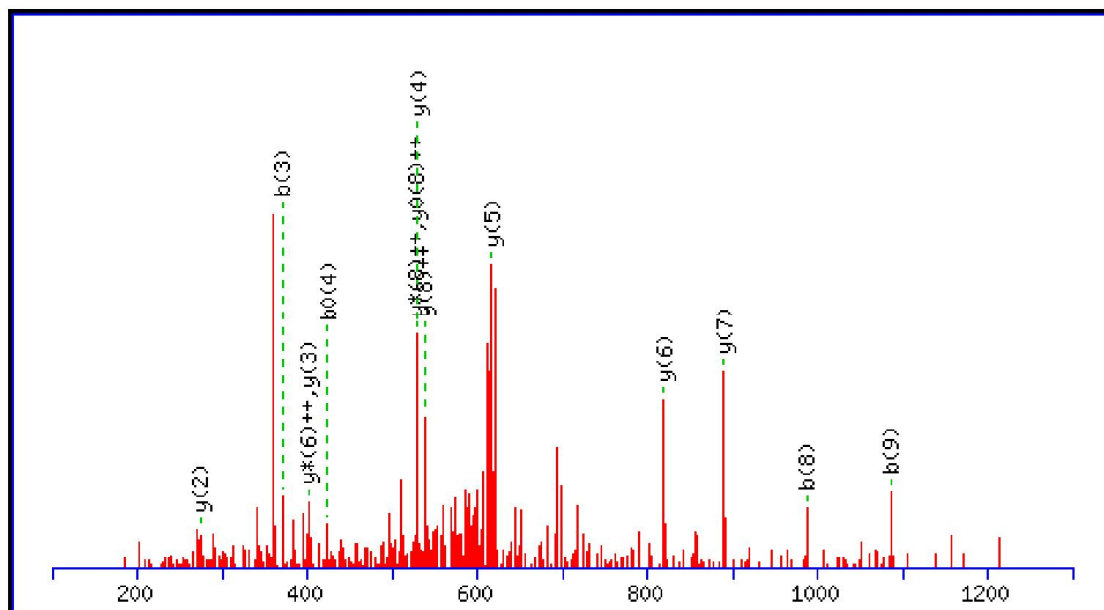**Monoisotopic mass of neutral peptide Mr(calc):** 1259.7106**Fixed modifications:** Carbamidomethyl (C) (apply to specified residues or termini only)**Variable modifications:****K3** : Propionyl (K)**K5** : Propionyl-(13CD3)Methyl (K)**Ions Score:** 24 **Expect:** 2**Matches** : 14/94 fragment ions using 33 most intense peaks

| #  | b                | b <sup>++</sup> | b*        | b <sup>++</sup> * | b <sup>0</sup>  | b <sup>0++</sup> | Seq. | y               | y <sup>++</sup> | y*        | y <sup>++</sup> * | y <sup>0</sup> | y <sup>0++</sup> | #  |
|----|------------------|-----------------|-----------|-------------------|-----------------|------------------|------|-----------------|-----------------|-----------|-------------------|----------------|------------------|----|
| 1  | 72.0444          | 36.5258         |           |                   |                 |                  | A    |                 |                 |           |                   |                |                  | 10 |
| 2  | 187.0713         | 94.0393         |           |                   | 169.0608        | 85.0340          | D    | 1189.6808       | 595.3440        | 1172.6542 | 586.8308          | 1171.6702      | 586.3388         | 9  |
| 3  | <b>371.1925</b>  | 186.0999        | 354.1660  | 177.5866          | 353.1819        | 177.0946         | K    | 1074.6539       | <b>537.8306</b> | 1057.6273 | <b>529.3173</b>   | 1056.6433      | <b>528.8253</b>  | 8  |
| 4  | 442.2296         | 221.6185        | 425.2031  | 213.1052          | <b>424.2191</b> | 212.6132         | A    | <b>890.5327</b> | 445.7700        | 873.5061  | 437.2567          | 872.5221       | 436.7647         | 7  |
| 5  | 644.3886         | 322.6980        | 627.3621  | 314.1847          | 626.3781        | 313.6927         | K    | <b>619.4956</b> | 410.2514        | 802.4690  | <b>401.7381</b>   | 801.4850       | 401.2461         | 6  |
| 6  | 731.4207         | 366.2140        | 714.3941  | 357.7007          | 713.4101        | 357.2087         | S    | <b>617.3366</b> | 309.1719        | 600.3100  | 300.6586          | 599.3260       | 300.1666         | 5  |
| 7  | 859.4792         | 430.2433        | 842.4527  | 421.7300          | 841.4687        | 421.2380         | Q    | <b>530.3045</b> | 265.6559        | 513.2780  | 257.1426          |                |                  | 4  |
| 8  | <b>987.5378</b>  | 494.2725        | 970.5113  | 485.7593          | 969.5273        | 485.2673         | Q    | <b>402.2459</b> | 201.6266        | 385.2194  | 193.1133          |                |                  | 3  |
| 9  | <b>1086.6062</b> | 543.8068        | 1069.5797 | 535.2935          | 1068.5957       | 534.8015         | V    | <b>274.1874</b> | 137.5973        | 257.1608  | 129.0840          |                |                  | 2  |
| 10 |                  |                 |           |                   |                 |                  | R    | 175.1190        | 88.0631         | 158.0924  | 79.5498           |                |                  | 1  |

Match to Query 6289: 1272.766208 from(637.390380,2+) intensity(306396.1563)

Title: File2138 Spectrum9095 scans: 10259

Data file I:\2013-12-03-SIMM7721-FR1-11-ZW.mgf

Click mouse within plot area to zoom in by factor of two about that point

Or,   to  Da Label all possible matches  Label matches used for scoring 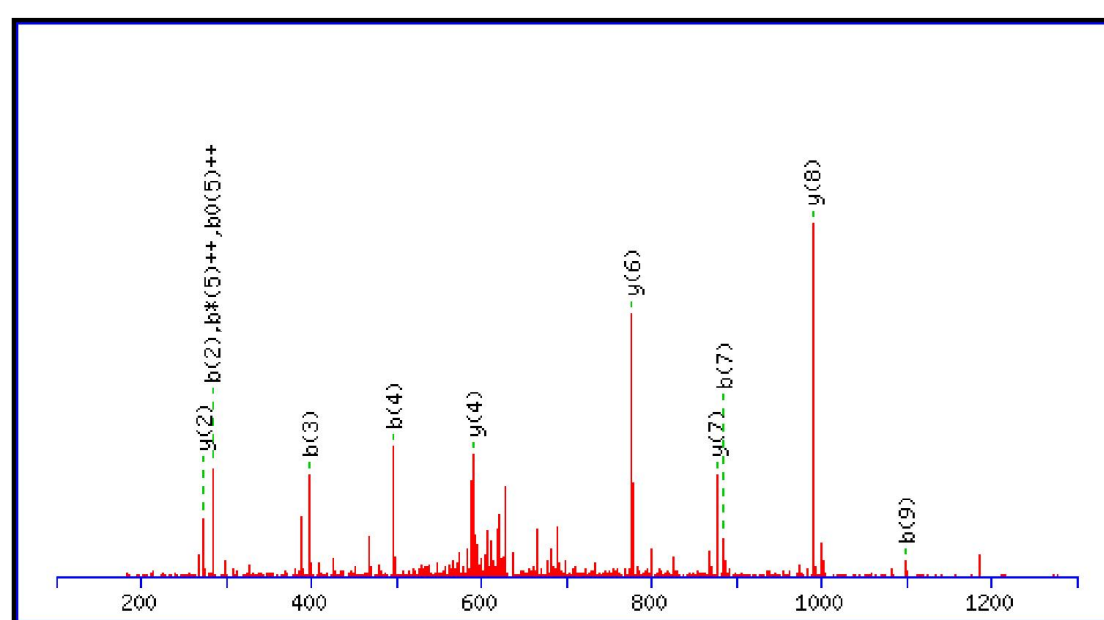**Monoisotopic mass of neutral peptide Mr(calc): 1272.7674****Fixed modifications:** Carbamidomethyl (C) (apply to specified residues or termini only)**Variable modifications:****K2** : Propionyl (K)**K7** : Propionyl-(13CD3)Methyl (K)**Ions Score:** 54 **Expect:** 0.0011**Matches** : 12/94 fragment ions using 11 most intense peaks

| #  | b                | b <sup>++</sup> | b <sup>*</sup> | b <sup>*++</sup> | b <sup>0</sup> | b <sup>0++</sup> | Seq. | y               | y <sup>++</sup> | y <sup>*</sup> | y <sup>*++</sup> | y <sup>0</sup> | y <sup>0++</sup> | #  |
|----|------------------|-----------------|----------------|------------------|----------------|------------------|------|-----------------|-----------------|----------------|------------------|----------------|------------------|----|
| 1  | 100.0757         | 50.5415         |                |                  |                |                  | V    |                 |                 |                |                  |                |                  | 10 |
| 2  | <b>284.1969</b>  | 142.6021        | 267.1703       | 134.0888         |                |                  | K    | 1174.7063       | 587.8568        | 1157.6797      | 579.3435         | 1156.6957      | 578.8515         | 9  |
| 3  | <b>398.2398</b>  | 199.6235        | 381.2132       | 191.1103         |                |                  | N    | <b>990.5851</b> | 495.7962        | 973.5586       | 487.2829         | 972.5745       | 486.7909         | 8  |
| 4  | <b>497.3082</b>  | 249.1577        | 480.2817       | 240.6445         |                |                  | V    | <b>876.5422</b> | 438.7747        | 859.5156       | 430.2615         | 858.5316       | 429.7694         | 7  |
| 5  | 584.3402         | 292.6738        | 567.3137       | <b>284.1605</b>  | 566.3297       | <b>283.6685</b>  | S    | <b>777.4738</b> | 389.2405        | 760.4472       | 380.7272         | 759.4632       | 380.2352         | 6  |
| 6  | 683.4087         | 342.2080        | 666.3821       | 333.6947         | 665.3981       | 333.2027         | V    | 690.4417        | 345.7245        | 673.4152       | 337.2112         | 672.4312       | 336.7192         | 5  |
| 7  | <b>885.5677</b>  | 443.2875        | 868.5411       | 434.7742         | 867.5571       | 434.2822         | K    | <b>591.3733</b> | 296.1903        | 574.3468       | 287.6770         | 573.3628       | 287.1850         | 4  |
| 8  | 1000.5946        | 500.8009        | 983.5681       | 492.2877         | 982.5840       | 491.7957         | D    | 389.2143        | 195.1108        | 372.1878       | 186.5975         | 371.2037       | 186.1055         | 3  |
| 9  | <b>1099.6630</b> | 550.3351        | 1082.6365      | 541.8219         | 1081.6525      | 541.3299         | V    | <b>274.1874</b> | 137.5973        | 257.1608       | 129.0840         |                |                  | 2  |
| 10 |                  |                 |                |                  |                |                  | R    | 175.1190        | 88.0631         | 158.0924       | 79.5498          |                |                  | 1  |

Match to Query 13911: 1790.038428 from(896.026490,2+) intensity(62980.0117)

Title: File2138 Spectrum17295 scans: 18827

Data file I:\2013-12-03-SIMM7721-FR1-11-ZW.mgf

Click mouse within plot area to zoom in by factor of two about that point

Or,   to  Da Label all possible matches  Label matches used for scoring 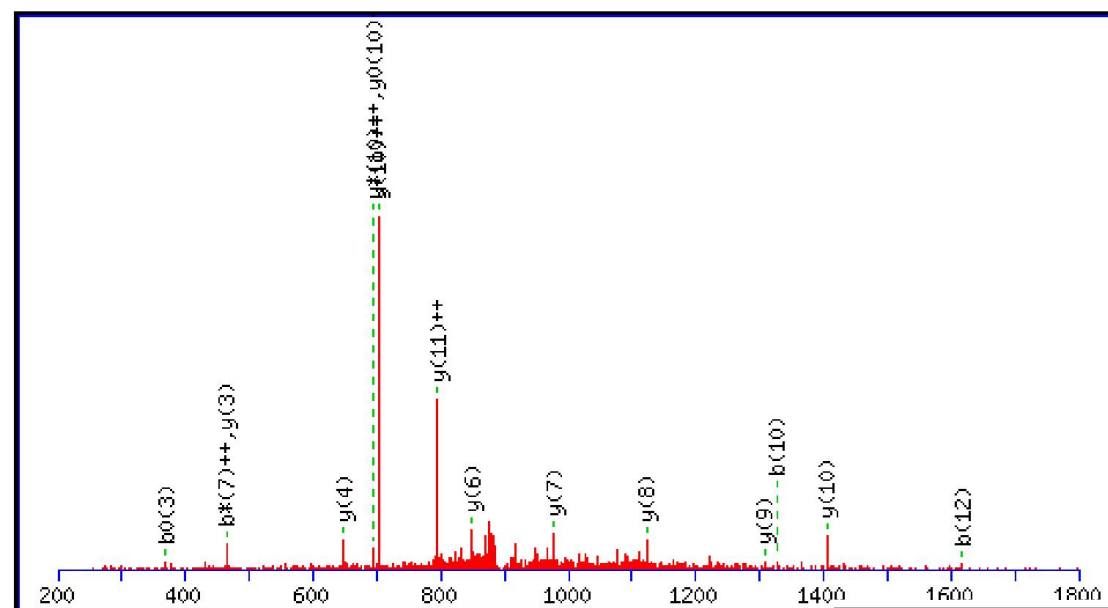**Monoisotopic mass of neutral peptide Mr(calc): 1790.****Fixed modifications:** Carbamidomethyl (C) (apply to spec:**Variable modifications:****K5** : Propionyl (K)**K10** : Propionyl (K)**K12** : Propionyl-(13CD3)Methyl (K)**Ions Score:** 32 **Expect:** 0.23**Matches** : 15/130 fragment ions using 31 most intense peak

| #  | b         | b <sup>++</sup> | b <sup>*</sup> | b <sup>*++</sup> | b <sup>0</sup> | b <sup>0++</sup> | Seq. | y         | y <sup>++</sup> | y <sup>*</sup> | y <sup>*++</sup> | y <sup>0</sup> | y <sup>0++</sup> | #  |
|----|-----------|-----------------|----------------|------------------|----------------|------------------|------|-----------|-----------------|----------------|------------------|----------------|------------------|----|
| 1  | 114.0913  | 57.5493         |                |                  |                |                  | L    |           |                 |                |                  |                |                  | 13 |
| 2  | 201.1234  | 101.0653        |                |                  | 183.1128       | 92.0600          | S    | 1677.9595 | 839.4834        | 1660.9330      | 830.9701         | 1659.9490      | 830.4781         | 12 |
| 3  | 387.2027  | 194.1050        |                |                  | 369.1921       | 185.0997         | W    | 1590.9275 | 795.9674        | 1573.9010      | 787.4541         | 1572.9169      | 786.9621         | 11 |
| 4  | 484.2554  | 242.6314        |                |                  | 466.2449       | 233.6261         | P    | 1404.8483 | 702.9277        | 1387.8216      | 694.4145         | 1386.8376      | 693.9225         | 10 |
| 5  | 668.3766  | 334.6919        | 651.3501       | 326.1787         | 650.3661       | 325.6867         | K    | 1307.7954 | 654.4014        | 1290.7689      | 645.8881         | 1289.7849      | 645.3961         | 9  |
| 6  | 815.4450  | 408.2262        | 798.4185       | 399.7129         | 797.4345       | 399.2209         | F    | 1123.6743 | 562.3408        | 1106.6477      | 553.8275         | 1105.6637      | 553.3355         | 8  |
| 7  | 943.5036  | 472.2554        | 926.4771       | 463.7422         | 925.4930       | 463.2502         | Q    | 976.6058  | 488.8066        | 959.5793       | 480.2933         | 958.5953       | 479.8013         | 7  |
| 8  | 1030.5356 | 515.7715        | 1013.5091      | 507.2582         | 1012.5251      | 506.7662         | S    | 848.5473  | 424.7773        | 831.5207       | 416.2640         | 830.5567       | 415.7720         | 6  |
| 9  | 1143.6197 | 572.3135        | 1126.5932      | 563.8002         | 1125.6091      | 563.3082         | I    | 761.5152  | 381.2613        | 744.4887       | 372.7480         | 743.5047       | 372.2560         | 5  |
| 10 | 1327.7409 | 664.3741        | 1310.7143      | 655.8608         | 1309.7303      | 655.3688         | K    | 648.4312  | 324.7192        | 631.4046       | 316.2059         | 630.4206       | 315.7139         | 4  |
| 11 | 1414.7729 | 707.8901        | 1397.7464      | 699.3768         | 1396.7623      | 698.8848         | S    | 464.3100  | 232.6586        | 447.2834       | 224.1454         | 446.2994       | 223.6534         | 3  |
| 12 | 1616.9319 | 808.9696        | 1599.9054      | 800.4563         | 1598.9214      | 799.9643         | K    | 377.2780  | 189.1426        | 360.2514       | 180.6293         |                |                  | 2  |
| 13 |           |                 |                |                  |                |                  | R    | 175.1190  | 88.0631         | 158.0924       | 79.5498          |                |                  | 1  |

Match to Query 7979: 1419.715188 from(710.864870, 2+) intensity(35569.4453)

Title: File2138 Spectrum8989 scans: 10148

Data file I:\2013-12-03-SIMM7721-FR1-11-ZW.mgf

Click mouse within plot area to zoom in by factor of two about that point

Or,   to  Da Label all possible matches  Label matches used for scoring 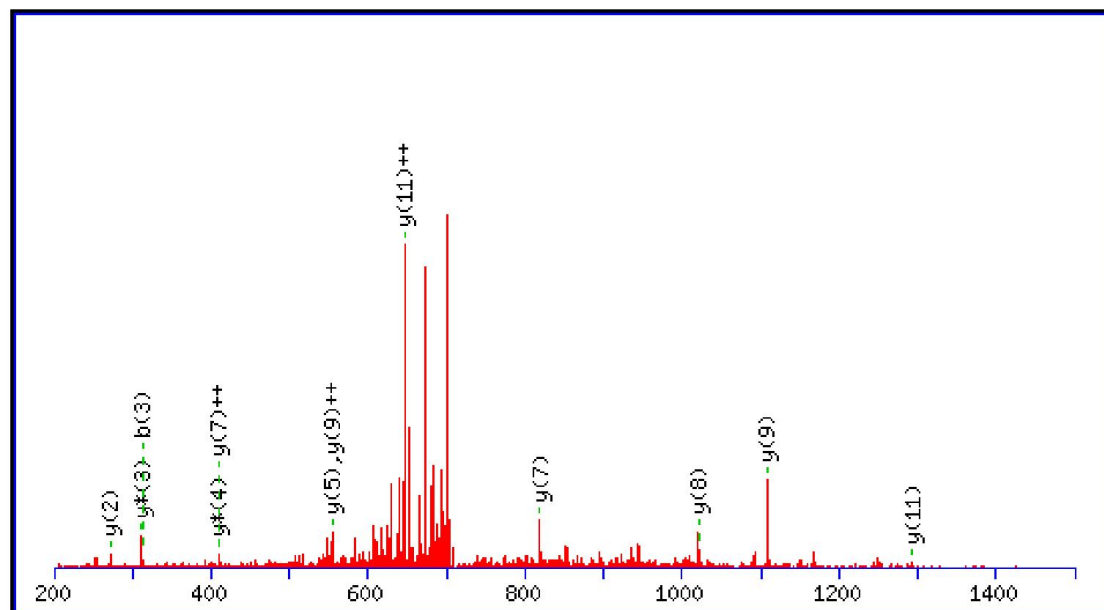**Monoisotopic mass of neutral peptide Mr(calc): 1419.****Fixed modifications:** Carbamidomethyl (C) (apply to speci**Variable modifications:****K5** : Propionyl-(13CD3)Methyl (K)**M6** : Label:13C(1)2H(3) (M)**Ions Score: 27 Expect: 0.62****Matches : 12/120 fragment ions using 24 most intense peak:**

| #  | b               | b <sup>++</sup> | b*        | b <sup>+++</sup> | b <sup>0</sup> | b <sup>0++</sup> | Seq.     | y                | y <sup>++</sup> | y*              | y <sup>+++</sup> | y <sup>0</sup> | y <sup>0++</sup> | #  |
|----|-----------------|-----------------|-----------|------------------|----------------|------------------|----------|------------------|-----------------|-----------------|------------------|----------------|------------------|----|
| 1  | 129.0659        | 65.0366         | 112.0393  | 56.5233          |                |                  | <b>Q</b> |                  |                 |                 |                  |                |                  | 11 |
| 2  | 226.1186        | 113.5629        | 209.0921  | 105.0497         |                |                  | <b>P</b> | <b>1292.6696</b> | <b>646.8385</b> | 1275.6431       | 638.3252         | 1274.6591      | 637.8332         | 12 |
| 3  | <b>313.1506</b> | 157.0790        | 296.1241  | 148.5657         | 295.1401       | 148.0737         | <b>S</b> | 1195.6169        | 598.3121        | 1178.5903       | 589.7988         | 1177.6063      | 589.3068         | 10 |
| 4  | 400.1827        | 200.5950        | 383.1561  | 192.0817         | 382.1721       | 191.5897         | <b>S</b> | <b>1108.5848</b> | <b>554.7961</b> | 1091.5583       | 546.2828         | 1090.5743      | 545.7908         | 9  |
| 5  | 602.3417        | 301.6745        | 585.3151  | 293.1612         | 584.3311       | 292.6692         | <b>K</b> | <b>1021.5528</b> | 511.2800        | 1004.5263       | 502.7668         | 1003.5422      | 502.2743         | 8  |
| 6  | 737.4044        | 369.2058        | 720.3778  | 360.6925         | 719.3938       | 360.2005         | <b>K</b> | <b>819.3938</b>  | <b>410.2005</b> | 802.3673        | 401.6873         | 801.3832       | 401.1953         | 7  |
| 7  | 866.4470        | 433.7271        | 849.4204  | 425.2138         | 848.4364       | 424.7218         | <b>E</b> | 684.3311         | 342.6692        | 667.3046        | 334.1559         | 666.3206       | 333.6639         | 6  |
| 8  | 995.4895        | 498.2484        | 978.4630  | 489.7351         | 977.4790       | 489.2431         | <b>E</b> | <b>555.2885</b>  | 278.1479        | 538.2620        | 269.6346         | 537.2780       | 269.1426         | 5  |
| 9  | 1092.5423       | 546.7748        | 1075.5158 | 538.2615         | 1074.5317      | 537.7695         | <b>P</b> | 428.2459         | 213.6266        | <b>409.2194</b> | 205.1133         |                |                  | 4  |
| 10 | 1149.5638       | 575.2855        | 1132.5372 | 566.7722         | 1131.5532      | 566.2802         | <b>G</b> | 329.1932         | 165.1002        | <b>312.1666</b> | 156.5870         |                |                  | 3  |
| 11 | 1246.6165       | 623.8119        | 1229.5900 | 615.2936         | 1228.6060      | 614.8066         | <b>P</b> | <b>272.1717</b>  | 136.5895        | 255.1452        | 123.0762         |                |                  | 2  |
| 12 |                 |                 |           |                  |                |                  | <b>R</b> | 175.1190         | 88.0631         | 158.0924        | 79.5498          |                |                  | 1  |



Match to Query 16507: 2036.032602 from(679.684810, 3+) intensity(31246.3711)

Title: File2138 Spectrum11727 scans: 13000

Data file I:\2013-12-03-SIMM7721-FR1-11-ZW.mgf

Click mouse within plot area to zoom in by factor of two about that point

Or,   to  Da Label all possible matches  Label matches used for scoring 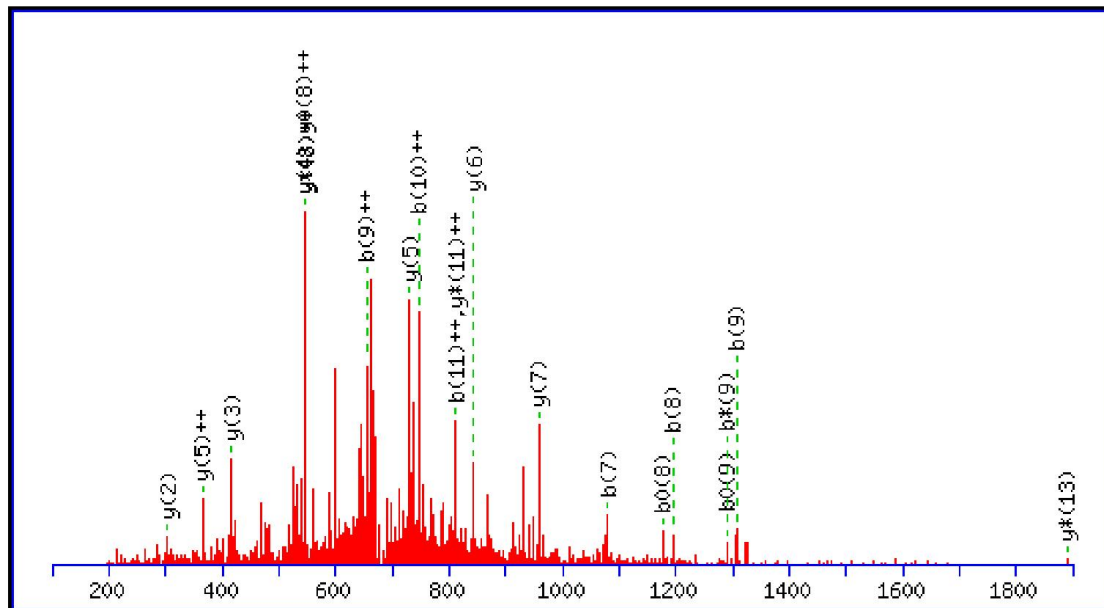Monoisotopic mass of neutral peptide  $M_r(\text{calc})$ : 2036.

Fixed modifications: Carbamidomethyl (C) (apply to speci

Variable modifications:

**K4** : Propionyl-(13CD3)Methyl (K)**M7** : Label:13C(1)2H(3)+Oxidation (M)**K10** : Propionyl (K)

Ions Score: 24 Expect: 2.5

Matches : 20/148 fragment ions using 31 most intense peaks

| #  | b                | b <sup>++</sup> | b <sup>*</sup>   | b <sup>+++</sup> | b <sup>0</sup>   | b <sup>0++</sup> | Seq.     | y               | y <sup>++</sup> | y <sup>*</sup>   | y <sup>+++</sup> | y <sup>0</sup> | y <sup>0++</sup> | #         |
|----|------------------|-----------------|------------------|------------------|------------------|------------------|----------|-----------------|-----------------|------------------|------------------|----------------|------------------|-----------|
| 1  | 130.0499         | 65.5286         |                  |                  | 112.0593         | 56.5233          | <b>E</b> |                 |                 |                  |                  |                |                  | <b>14</b> |
| 2  | 44.0928          | 122.5500        | 227.0662         | 114.0368         | 226.0822         | 113.5448         | <b>N</b> | 1907.9825       | 954.4949        | <b>1890.9560</b> | 945.9816         | 1889.9720      | 945.4896         | <b>13</b> |
| 3  | 400.1939         | 200.6006        | 383.1674         | 192.0873         | 382.1833         | 191.5953         | <b>R</b> | 1793.9396       | 897.4734        | 1776.9131        | 888.9602         | 1775.9290      | 888.4682         | <b>12</b> |
| 4  | 602.3529         | 301.6801        | 585.3264         | 293.1668         | 584.3424         | 292.6748         | <b>K</b> | 1637.8385       | 819.4229        | 1620.8119        | <b>810.9096</b>  | 1619.8279      | 810.4176         | <b>11</b> |
| 5  | 765.4162         | 383.2118        | 748.3897         | 374.6985         | 747.4057         | 374.2065         | <b>Y</b> | 1435.6795       | 718.3434        | 1418.6529        | 709.8301         | 1417.6689      | 709.3381         | <b>10</b> |
| 6  | 928.4796         | 464.7434        | 911.4530         | 456.2302         | 910.4690         | 455.7381         | <b>Y</b> | 1272.6161       | 636.8117        | 1255.5896        | 628.2984         | 1254.6056      | 627.8064         | <b>9</b>  |
| 7  | 1079.5372        | 540.2722        | 1062.5106        | 531.7589         | 1061.5266        | 531.2669         | <b>N</b> | 1109.5528       | 555.2800        | 1092.5263        | <b>546.7668</b>  | 1091.5423      | <b>546.2748</b>  | <b>8</b>  |
| 8  | <b>1194.5641</b> | 597.7857        | 1177.5376        | 589.2724         | <b>1176.5535</b> | 588.7804         | <b>D</b> | <b>958.4952</b> | 479.7513        | 941.4687         | 471.2380         | 940.4847       | 470.7460         | <b>7</b>  |
| 9  | <b>1307.6482</b> | <b>654.3277</b> | <b>1290.6216</b> | 645.8144         | <b>1289.6376</b> | 645.3224         | <b>L</b> | <b>843.4683</b> | 422.2378        | 826.4417         | 413.7245         | 825.4577       | 413.2325         | <b>6</b>  |
| 10 | 1491.7693        | <b>746.3883</b> | 1474.7428        | 737.8750         | 1473.7588        | 737.3830         | <b>K</b> | <b>730.3842</b> | <b>365.6958</b> | 713.3577         | 357.1825         | 712.3737       | 356.6905         | <b>5</b>  |
| 11 | 1620.8119        | <b>810.9096</b> | 1603.7854        | 802.3963         | 1602.8014        | 801.9043         | <b>E</b> | <b>546.2631</b> | 273.6352        | 529.2365         | 265.1219         | 528.2525       | 264.6299         | <b>4</b>  |
| 12 | 1734.8549        | 867.9311        | 1717.8283        | 859.4178         | 1716.8443        | 858.9258         | <b>K</b> | <b>417.2205</b> | 209.1139        | 400.1939         | 200.6006         |                |                  | <b>3</b>  |
| 13 | 1862.9134        | 931.9604        | 1845.8869        | 923.4471         | 1844.9029        | 922.9551         | <b>Q</b> | <b>303.1775</b> | 152.0924        | 286.1510         | 143.5791         |                |                  | <b>2</b>  |
| 14 |                  |                 |                  |                  |                  |                  | <b>R</b> | 175.1190        | 88.0631         | 158.0924         | 79.5498          |                |                  | <b>1</b>  |

MS/MS Fragmentation of **AKGLKDIR**

Found in **D6RA70**, Probable ATP-dependent RNA helicase YTHDC2 OS=Homo sapiens GN=YTHDC2 PE=2 SV=1

Match to Query 3450: 1029.645108 from(515.829830, 2+) intensity(41989.7031)

Title: File2138 Spectrum10209 scans: 11419

Data file I:\2013-12-03-SIMM7721-FR1-11-ZW.mgf

Click mouse within plot area to zoom in by factor of two about that point

Or,   to  Da

Label all possible matches  Label matches used for scoring

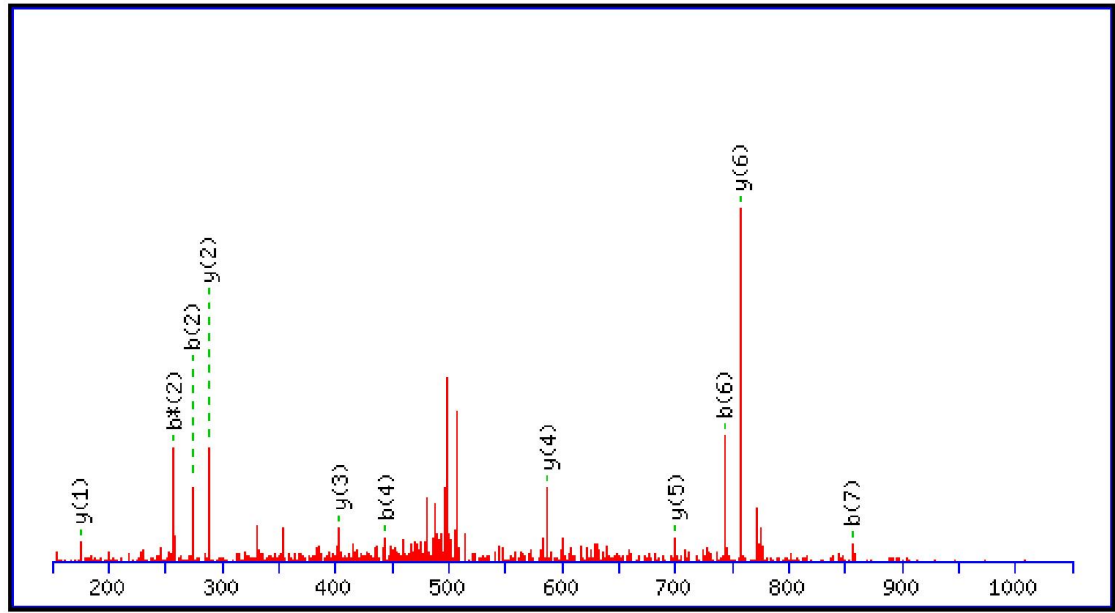

**Monoisotopic mass of neutral peptide Mr(c#**

**Fixed modifications:** Carbamidomethyl (C) (ap

**Variable modifications:**

**K2** : Propionyl-(13CD3)Methyl (K)

**K5** : Propionyl (K)

**Ions Score:** 34 **Expect:** 0.064

**Matches :** 11/68 fragment ions using 26 most i

| # | b               | b <sup>++</sup> | b*              | b <sup>*++</sup> | b <sup>0</sup> | b <sup>0++</sup> | Seq. | y               | y <sup>++</sup> | y*       | y <sup>*++</sup> | y <sup>0</sup> | y <sup>0++</sup> | # |
|---|-----------------|-----------------|-----------------|------------------|----------------|------------------|------|-----------------|-----------------|----------|------------------|----------------|------------------|---|
| 1 | 723.0444        | 36.5258         |                 |                  |                |                  | A    |                 |                 |          |                  |                |                  | 8 |
| 2 | <b>274.2034</b> | 137.6053        | <b>257.1769</b> | 129.0921         |                |                  | K    | 959.6157        | 480.3115        | 942.5891 | 471.7982         | 941.6051       | 471.3062         | 7 |
| 3 | 331.2249        | 166.1161        | 314.1983        | 157.6028         |                |                  | G    | <b>757.4567</b> | 379.2320        | 740.4301 | 370.7187         | 739.4461       | 370.2267         | 6 |
| 4 | <b>444.3089</b> | 222.6581        | 427.2824        | 214.1448         |                |                  | L    | <b>700.4352</b> | 350.7212        | 683.4087 | 342.2080         | 682.4246       | 341.7160         | 5 |
| 5 | 628.4301        | 314.7187        | 611.4036        | 306.2054         |                |                  | K    | <b>587.3511</b> | 294.1792        | 570.3246 | 285.6659         | 569.3406       | 285.1739         | 4 |
| 6 | <b>743.4571</b> | 372.2322        | 726.4305        | 363.7189         | 725.4465       | 363.2269         | D    | <b>403.2300</b> | 202.1186        | 386.2034 | 193.6053         | 385.2194       | 193.1133         | 3 |
| 7 | <b>856.5411</b> | 428.7742        | 839.5146        | 420.2609         | 838.5306       | 419.7689         | I    | <b>288.2030</b> | 144.6051        | 271.1765 | 136.0919         |                |                  | 2 |
| 8 |                 |                 |                 |                  |                |                  | R    | <b>175.1190</b> | 88.0631         | 158.0924 | 79.5498          |                |                  | 1 |

Match to Query 13876: 2041.058208 from(1021.536380, 2+) intensity(36121.1484)

Title: File2127 Spectrum4467 scans: 5468

Data file I:\2013-12-03-SIMM7721-FR1-7-ZW.mgf

Click mouse within plot area to zoom in by factor of two about that point

Or,   to  Da Label all possible matches  Label matches used for scoring 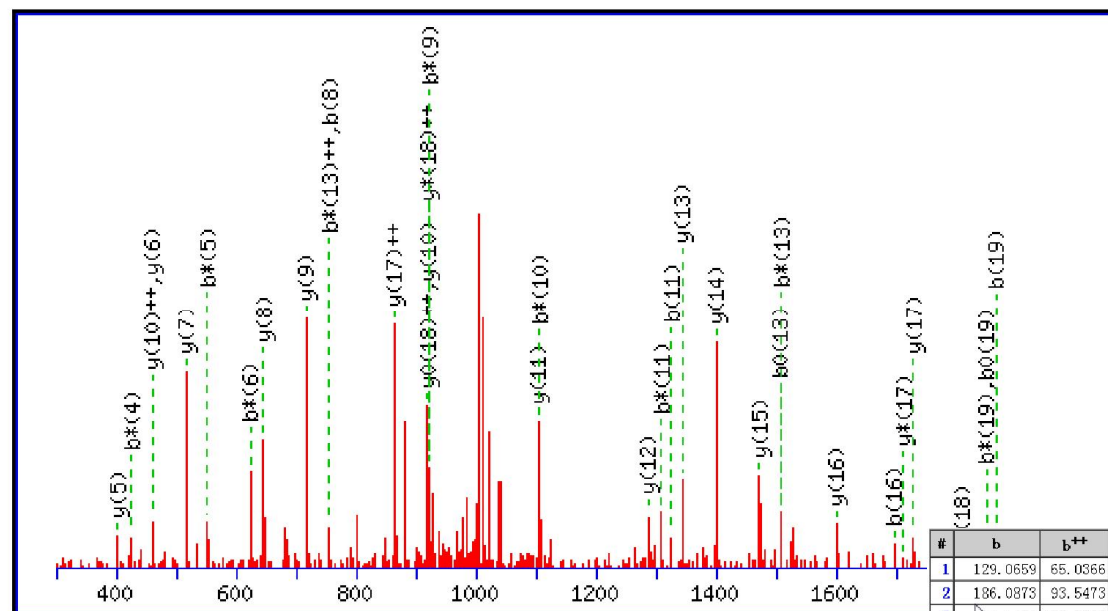**Monoisotopic mass of neutral peptide Mr(calc):** 2041.0574**Fixed modifications:** Carbamidomethyl (C) (apply to specified r**Variable modifications:****K9** : Propionyl (K)**K10** : Propionyl (K)**K11** : Propionyl-(13CD3)Methyl (K)**Ions Score:** 88 **Expect:** 1e-006**Matches** : 34/190 fragment ions using 51 most intense peaks ([he](#)

| #  | b         | b <sup>++</sup> | b*        | b <sup>++</sup> | b <sup>0</sup> | b <sup>0++</sup> | Seq. | y         | y <sup>++</sup> | y*        | y <sup>++</sup> | y <sup>0</sup> | y <sup>0++</sup> | #  |
|----|-----------|-----------------|-----------|-----------------|----------------|------------------|------|-----------|-----------------|-----------|-----------------|----------------|------------------|----|
| 1  | 129.0659  | 65.0366         | 112.0393  | 56.5233         |                |                  | Q    |           |                 |           |                 |                |                  | 20 |
| 2  | 186.0873  | 93.5473         | 169.0608  | 85.0340         |                |                  | G    | 1914.0061 | 957.5067        | 1896.9795 | 948.9934        | 1895.9955      | 948.5014         | 19 |
| 3  | 444.1459  | 157.5766        | 297.1193  | 149.0633        |                |                  | Q    | 1856.9846 | 928.9959        | 1839.9580 | 920.4827        | 1838.9740      | 919.9906         | 18 |
| 4  | 442.2045  | 221.6059        | 425.1779  | 213.0926        |                |                  | Q    | 1728.9260 | 864.9666        | 1711.8995 | 856.4534        | 1710.9154      | 855.9614         | 17 |
| 5  | 570.2631  | 285.6352        | 553.2365  | 277.1219        |                |                  | Q    | 1600.8674 | 800.9374        | 1583.8409 | 792.4241        | 1582.8569      | 791.9321         | 16 |
| 6  | 641.3002  | 321.1537        | 624.2736  | 312.6404        |                |                  | A    | 1472.8089 | 736.9081        | 1455.7823 | 728.3945        | 1454.7983      | 727.9028         | 15 |
| 7  | 698.3216  | 349.6645        | 681.2951  | 341.1512        |                |                  | G    | 1401.7717 | 701.3895        | 1384.7452 | 692.8762        | 1383.7612      | 692.3842         | 14 |
| 8  | 755.3431  | 378.1752        | 738.3165  | 369.6619        |                |                  | C    | 1344.7503 | 672.8788        | 1327.7237 | 664.3655        | 1326.7397      | 663.8735         | 13 |
| 9  | 939.4643  | 470.2358        | 922.4377  | 461.7225        |                |                  | K    | 1287.7288 | 644.3620        | 1270.7023 | 635.8548        | 1269.7182      | 635.3628         | 12 |
| 10 | 1123.5855 | 562.2964        | 1106.5589 | 553.7831        |                |                  | K    | 1103.6076 | 552.3075        | 1086.5811 | 543.7942        | 1085.5971      | 543.3022         | 11 |
| 11 | 1325.7445 | 663.3759        | 1308.7179 | 654.8626        |                |                  | K    | 919.4865  | 460.2469        | 902.4599  | 451.7336        | 901.4759       | 451.2416         | 10 |
| 12 | 1396.7816 | 698.8944        | 1379.7550 | 690.3812        |                |                  | A    | 717.3274  | 359.1674        | 700.3009  | 350.6541        | 699.3169       | 350.1621         | 9  |
| 13 | 1525.8242 | 763.4157        | 1508.7976 | 754.9024        | 1507.8136      | 754.4104         | E    | 646.2903  | 323.6488        | 629.2638  | 315.1355        | 628.2798       | 314.6435         | 8  |
| 14 | 1582.8456 | 791.9265        | 1565.8191 | 783.4132        | 1564.8351      | 782.9212         | G    | 517.2477  | 259.1275        | 500.2212  | 250.6142        |                |                  | 7  |
| 15 | 1639.8671 | 820.4372        | 1622.8405 | 811.9239        | 1621.8565      | 811.4319         | G    | 460.2263  | 230.6168        | 443.1997  | 222.1035        |                |                  | 6  |
| 16 | 1696.8886 | 848.9479        | 1679.8620 | 840.4346        | 1678.8780      | 839.9426         | G    | 403.2048  | 202.1060        | 386.1783  | 193.5928        |                |                  | 5  |
| 17 | 1753.9100 | 877.4587        | 1736.8835 | 868.9454        | 1735.8995      | 868.4534         | G    | 346.1833  | 173.5953        | 329.1568  | 165.0820        |                |                  | 4  |
| 18 | 1810.9315 | 905.9694        | 1793.9049 | 897.4561        | 1792.9209      | 896.9641         | G    | 289.1619  | 145.0846        | 272.1353  | 136.5713        |                |                  | 3  |
| 19 | 1867.9530 | 934.4801        | 1850.9264 | 925.9668        | 1849.9424      | 925.4748         | G    | 232.1404  | 116.5738        | 215.1139  | 108.0608        |                |                  | 2  |
| 20 | 175.1190  | 88.0631         | 158.0924  | 79.5498         |                |                  | R    |           |                 |           |                 |                |                  |    |

MS/MS Fragmentation of **AKGASGVEPGR**

Found in **F8VP44**, Microspherule protein 1 (Fragment) OS=Homo sapiens GN=MCRS1 PE=2 SV=1

Match to Query 4575: 1101.603368 from(551.808960, 2+) intensity(11967.7373)

Title: File2127 Spectrum3538 scans: 4461

Data file I:\2013-12-03-SIMM7721-FR1-7-ZW.mgf

Click mouse within plot area to zoom in by factor of two about that point

Or,   to  Da

Label all possible matches  Label matches used for scoring

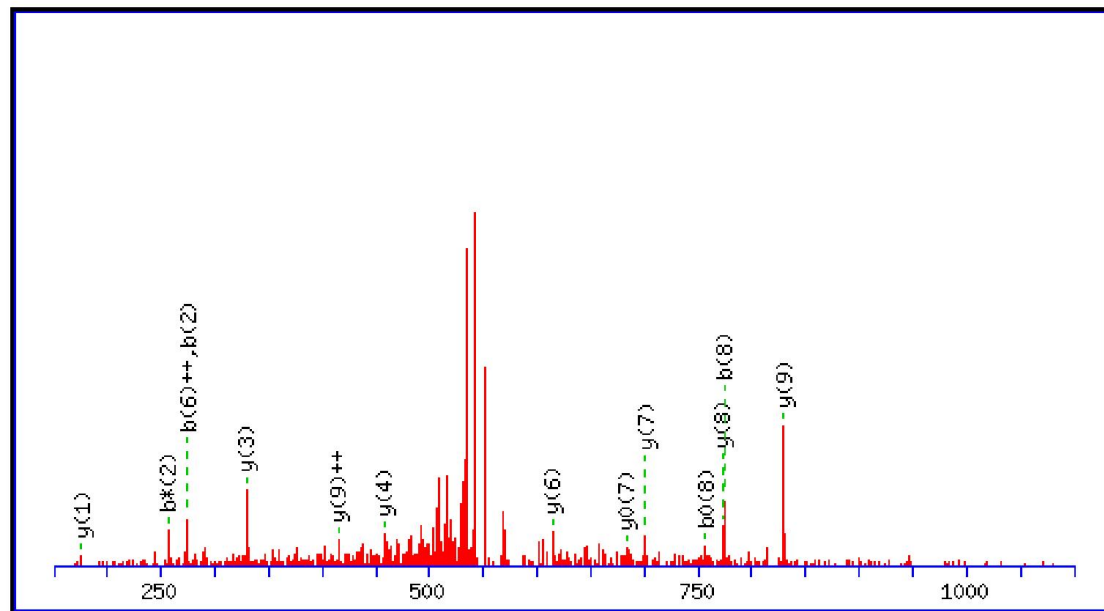

**Monoisotopic mass of neutral peptide Mr(calc): 1101.**

**Fixed modifications:** Carbamidomethyl (C) (apply to speci

**Variable modifications:**

**K2** : Propionyl-(13CD3)Methyl (K)

**Ions Score: 40 Expect: 0.045**

**Matches : 14/104 fragment ions using 29 most intense peak:**

| #  | b               | b <sup>++</sup> | b <sup>+</sup>  | b <sup>+++</sup> | b <sup>0</sup>  | b <sup>0++</sup> | Seq. | y               | y <sup>++</sup> | y <sup>+</sup> | y <sup>+++</sup> | y <sup>0</sup>  | y <sup>0++</sup> | #  |
|----|-----------------|-----------------|-----------------|------------------|-----------------|------------------|------|-----------------|-----------------|----------------|------------------|-----------------|------------------|----|
| 1  | 72.0444         | 36.5258         |                 |                  |                 |                  | A    |                 |                 |                |                  |                 |                  | 11 |
| 2  | <b>274.2034</b> | 137.6053        | <b>257.1769</b> | 129.0921         |                 |                  | K    | 1031.5753       | 516.2913        | 1014.5487      | 507.7780         | 1013.5647       | 507.2860         | 10 |
| 3  | 331.2249        | 166.1161        | 314.1983        | 157.6028         |                 |                  | G    | <b>829.4163</b> | <b>415.2118</b> | 812.3897       | 406.6985         | 811.4057        | 406.2065         | 9  |
| 4  | 402.2620        | 201.6346        | 385.2354        | 193.1214         |                 |                  | A    | <b>772.3948</b> | 386.7010        | 755.3682       | 378.1878         | 754.3842        | 377.6958         | 8  |
| 5  | 489.2940        | 245.1506        | 472.2675        | 236.6374         | 471.2834        | 236.1454         | S    | <b>701.3577</b> | 351.1825        | 684.3311       | 342.6692         | <b>683.3471</b> | 342.1772         | 7  |
| 6  | 546.3155        | <b>273.6614</b> | 529.2889        | 265.1481         | 528.3049        | 264.6561         | G    | <b>614.3257</b> | 307.6665        | 597.2991       | 299.1532         | 596.3151        | 298.6612         | 6  |
| 7  | 645.3839        | 323.1956        | 628.3573        | 314.6823         | 627.3733        | 314.1903         | V    | 557.3042        | 279.1557        | 540.2776       | 270.6425         | 539.2936        | 270.1504         | 5  |
| 8  | <b>774.4265</b> | 387.7169        | 757.3999        | 379.2036         | <b>756.4159</b> | 378.7116         | E    | <b>458.2358</b> | 229.6215        | 441.2092       | 221.1083         | 440.2252        | 220.6162         | 4  |
| 9  | 871.4792        | 436.2433        | 854.4527        | 427.7300         | 853.4687        | 427.2380         | P    | <b>329.1932</b> | 165.1002        | 312.1666       | 156.5870         |                 |                  | 3  |
| 10 | 928.5007        | 464.7540        | 911.4742        | 456.2407         | 910.4901        | 455.7487         | G    | 232.1404        | 116.5738        | 215.1139       | 108.0606         |                 |                  | 2  |
| 11 |                 |                 |                 |                  |                 |                  | R    | <b>175.1190</b> | 88.0631         | 158.0924       | 79.5498          |                 |                  | 1  |

MS/MS Fragmentation of **KAVAFGKR**

Found in **Q5VTI5**, Pleckstrin homology domain-containing family A member 6 OS=Homo sapiens GN=PLEKHA6 PE=2 SV=1 **341**

Match to Query 3845: 1005.625348 from(503.819950, 2+) intensity(84494.7266)

Title: File2129 Spectrum9966 scans: 11045

Data file I:\2013-12-03-SIMM7721-PR1-8-ZW.mgf

Click mouse within plot area to zoom in by factor of two about that point

Or,   to  Da

Label all possible matches  Label matches used for scoring

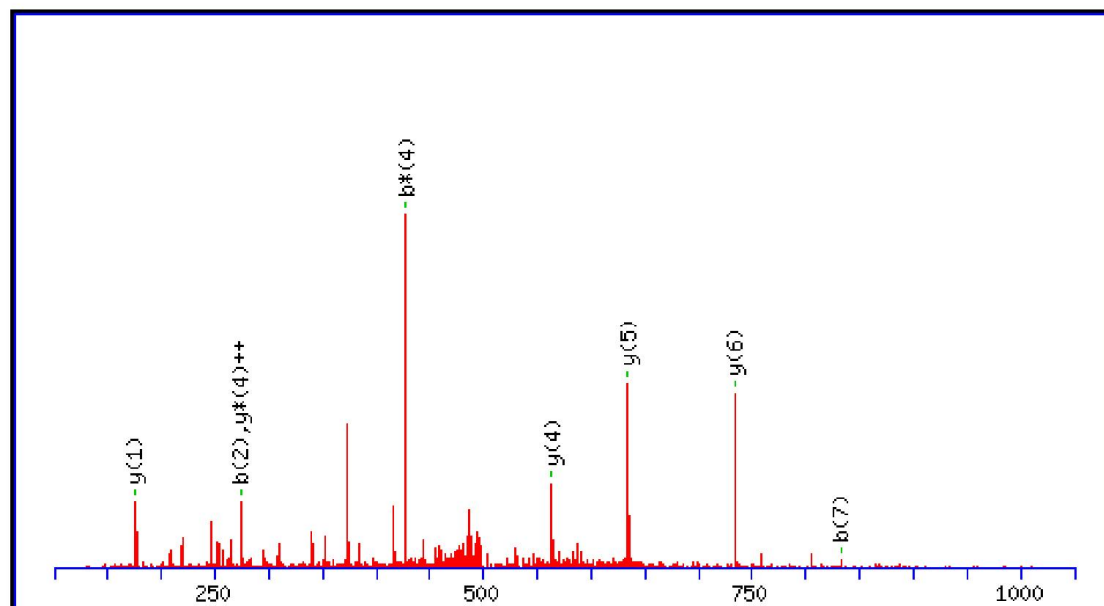

**Monoisotopic mass of neutral peptide Mr(calc):** 1005.  
**Fixed modifications:** Carbamidomethyl (C) (apply to speci  
**Variable modifications:**  
**K1** : Propionyl-(13CD3)Methyl (K)  
**K7** : Propionyl (K)  
**Ions Score:** 33 **Expect:** 0.097  
**Matches** : 8/56 fragment ions using 9 most intense peaks

| # | b               | b <sup>++</sup> | b*              | b <sup>*++</sup> | Seq.     | y               | y <sup>++</sup> | y*       | y <sup>*++</sup> | #        |
|---|-----------------|-----------------|-----------------|------------------|----------|-----------------|-----------------|----------|------------------|----------|
| 1 | 203.1663        | 102.0868        | 186.1397        | 93.5735          | <b>K</b> |                 |                 |          |                  | <b>8</b> |
| 2 | <b>274.2034</b> | 137.6053        | 257.1769        | 129.0921         | <b>A</b> | 804.4727        | 402.7400        | 787.4461 | 394.2267         | <b>7</b> |
| 3 | 373.2718        | 187.1395        | 356.2453        | 178.6263         | <b>V</b> | <b>733.4355</b> | 367.2214        | 716.4090 | 358.7081         | <b>6</b> |
| 4 | 444.3089        | 222.6581        | <b>427.2824</b> | 214.1448         | <b>A</b> | <b>634.3671</b> | 317.6872        | 617.3406 | 309.1739         | <b>5</b> |
| 5 | 591.3773        | 296.1923        | 574.3508        | 287.6790         | <b>F</b> | <b>563.3300</b> | 282.1686        | 546.3035 | <b>273.6554</b>  | <b>4</b> |
| 6 | 648.3988        | 324.7030        | 631.3723        | 316.1898         | <b>G</b> | 416.2616        | 208.6344        | 399.2350 | 200.1212         | <b>3</b> |
| 7 | <b>832.5200</b> | 416.7636        | 815.4934        | 408.2504         | <b>K</b> | 359.2401        | 180.1237        | 342.2136 | 171.6104         | <b>2</b> |
| 8 |                 |                 |                 |                  | <b>R</b> | <b>175.1190</b> | 88.0631         | 158.0924 | 79.5498          | <b>1</b> |

Found in **060431**, Olfactory receptor 1I1 OS=Homo sapiens GN=OR1I1 PE=2 SV=1

Match to Query 16922: 2175.309042 from(726.110290, 3+) intensity(155775.5469)

Title: File2129 Spectrum20508 scans: 22105

Data file I:\2013-12-03-SIMM7721-FR1-8-ZW.mgf

Click mouse within plot area to zoom in by factor of two about that point

Or,   to  Da Label all possible matches  Label matches used for scoring 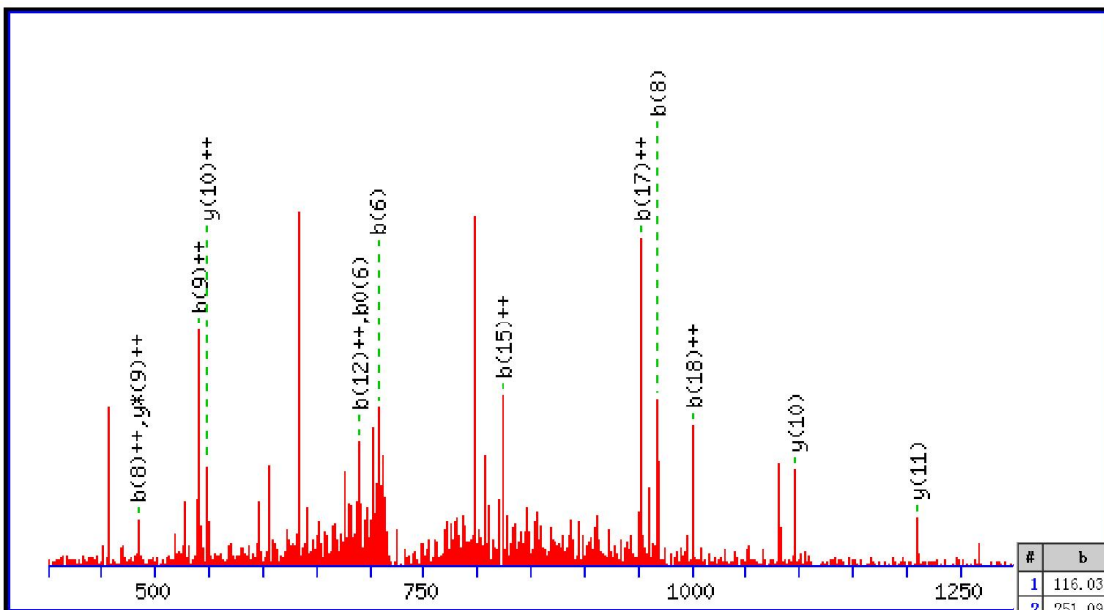**Monoisotopic mass of neutral peptide Mr(calc): 2175.2937****Fixed modifications:** Carbamidomethyl (C) (apply to specified residues)**Variable modifications:****M2** : Label:13C(1)2H(3) (M)**K3** : Propionyl-(13CD3)Methyl (K)**K8** : Propionyl-(13CD3)Methyl (K)**Ions Score:** 21 **Expect:** 0.84**Matches** : 15/176 fragment ions using 33 most intense peaks [\(help\)](#)

| #  | b               | b <sup>++</sup>  | b <sup>+</sup> | b <sup>+++</sup> | b <sup>0</sup>  | b <sup>0++</sup> | Seq. | y                | y <sup>++</sup> | y <sup>+</sup> | y <sup>+++</sup> | #  |
|----|-----------------|------------------|----------------|------------------|-----------------|------------------|------|------------------|-----------------|----------------|------------------|----|
| 1  | 116.0342        | 58.5207          |                |                  | 98.0237         | 49.5155          | D    |                  |                 |                |                  | 19 |
| 2  | 251.0989        | 126.0521         |                |                  | 233.0863        | 117.0468         | H    | 2061.2741        | 1031.1407       | 2044.2475      | 1022.6274        | 18 |
| 3  | 453.2559        | 227.1316         | 436.2294       | 218.6183         | 435.2453        | 218.1263         | K    | 1926.2114        | 963.6093        | 1909.1849      | 955.0961         | 17 |
| 4  | 524.2930        | 262.6501         | 507.2665       | 254.1369         | 506.2825        | 253.6449         | A    | 1724.0524        | 862.5298        | 1707.0258      | 854.0166         | 16 |
| 5  | 595.3301        | <b>298.1687</b>  | 578.3036       | 289.6554         | 577.3196        | 289.1634         | A    | 1653.0153        | 827.0113        | 1635.9887      | 818.4980         | 15 |
| 6  | <b>708.4142</b> | 354.7107         | 691.3876       | 346.1975         | <b>690.4036</b> | 345.7055         | L    | 1581.9782        | 791.4927        | 1564.9516      | 782.9794         | 14 |
| 7  | 765.4357        | 383.2215         | 748.4091       | 374.7082         | 747.4251        | 374.2162         | G    | 1468.8941        | 734.9507        | 1451.8676      | 726.4374         | 13 |
| 8  | <b>967.5947</b> | <b>484.3010</b>  | 950.5681       | 475.7877         | 949.5841        | 475.2957         | K    | 1411.8726        | 706.4400        | 1394.8461      | 697.9287         | 12 |
| 9  | 1080.6787       | <b>540.8430</b>  | 1063.6522      | 532.3297         | 1062.6682       | 531.8377         | L    | <b>1209.7136</b> | 605.3605        | 1192.6871      | 596.8472         | 11 |
| 10 | 1193.7628       | 597.3850         | 1176.7362      | 588.8718         | 1175.7522       | 588.3798         | I    | <b>1096.6296</b> | <b>548.8184</b> | 1079.6030      | 540.3051         | 10 |
| 11 | 1250.7843       | 625.8958         | 1233.7577      | 617.3825         | 1232.7737       | 616.8905         | G    | 983.5455         | 492.2764        | 966.5189       | <b>483.7631</b>  | 9  |
| 12 | 1378.8792       | <b>689.9433</b>  | 1361.8527      | 681.4300         | 1360.8687       | 680.9380         | K    | 926.5240         | 463.7657        | 909.4975       | 455.2524         | 8  |
| 13 | 1477.9476       | 739.4775         | 1460.9211      | 730.9642         | 1459.9371       | 730.4722         | V    | 798.4291         | 399.7182        | 781.4025       | 391.2049         | 7  |
| 14 | 1548.9848       | 774.9950         | 1531.9582      | 766.4827         | 1530.9742       | 765.9907         | A    | 699.3607         | 350.1840        | 682.3341       | 341.6707         | 6  |
| 15 | 1648.0532       | <b>824.5302</b>  | 1631.0266      | 816.0169         | 1630.0426       | 815.5249         | V    | 628.3235         | 314.6654        | 611.2970       | 306.1521         | 5  |
| 16 | 1745.1059       | 873.0566         | 1728.0794      | 864.5433         | 1727.0954       | 864.0513         | P    | 529.2551         | 265.1312        | 512.2286       | 256.6179         | 4  |
| 17 | 1905.1366       | <b>953.0719</b>  | 1888.1100      | 944.5587         | 1887.1260       | 944.0666         | C    | 432.2024         | 216.6048        | 415.1758       | 208.0915         | 3  |
| 18 | 2002.1893       | <b>1001.5983</b> | 1985.1628      | 993.0850         | 1984.1788       | 992.5930         | P    | <b>272.1717</b>  | 136.5895        | 255.1452       | 128.0762         | 2  |
| 19 |                 |                  |                |                  |                 |                  | R    | 175.1190         | 88.0631         | 158.0924       | 79.5498          | 1  |

Match to Query 13991: 1797.905608 from(899.960080, 2+) intensity(36378.1719)

Title: File2129 Spectrum6164 scans: 7079

Data file I:\2013-12-03-SIMM7721-FR1-8-ZW.mgf

Click mouse within plot area to zoom in by factor of two about that point

Or,   to  Da Label all possible matches  Label matches used for scoring 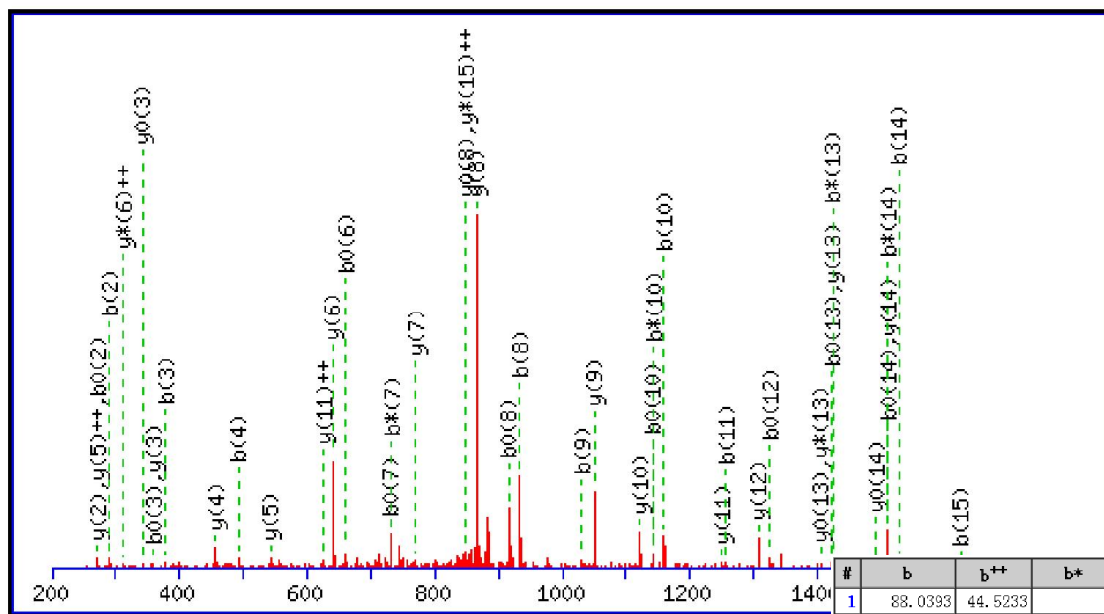**Monoisotopic mass of neutral peptide Mr(calc): 1797.****Fixed modifications:** Carbamidomethyl (C) (apply to speci**Variable modifications:****K2** : Propionyl-(13CD3)Methyl (K)**K8** : Propionyl (K)**Ions Score:** 78 **Expect:** 6.8e-006**Matches** : 44/174 fragment ions using 72 most intense peaks:

| #  | b                | b <sup>++</sup> | b <sup>+</sup>   | b <sup>++</sup> | b <sup>0</sup>   | b <sup>0++</sup> | Seq. | y                | y <sup>++</sup> | y <sup>+</sup>   | y <sup>++</sup> | y <sup>0</sup>   | y <sup>0++</sup> | #  |
|----|------------------|-----------------|------------------|-----------------|------------------|------------------|------|------------------|-----------------|------------------|-----------------|------------------|------------------|----|
| 1  | 88.0393          | 44.5233         |                  |                 | 70.0287          | 35.5180          | S    |                  |                 |                  |                 |                  |                  | 16 |
| 2  | <b>290.1983</b>  | 145.6028        | 273.1718         | 137.0895        | <b>272.1878</b>  | 136.5975         | K    | 1711.8770        | 856.4421        | 1694.8504        | <b>847.9289</b> | 1693.8664        | 847.4369         | 15 |
| 3  | <b>377.2303</b>  | 189.1188        | 360.2038         | 180.6055        | <b>359.2198</b>  | 180.1135         | S    | <b>1509.7180</b> | 755.3626        | 1492.6914        | 746.8494        | <b>1491.7074</b> | 746.3573         | 14 |
| 4  | <b>492.2573</b>  | 246.6323        | 475.2307         | 238.1190        | 474.2467         | 237.6270         | D    | <b>1422.6859</b> | 711.8466        | <b>1405.6594</b> | 703.3333        | <b>1404.6754</b> | 702.8413         | 13 |
| 5  | 549.2788         | 275.1430        | 532.2522         | 266.6297        | 531.2682         | 266.1377         | G    | <b>1307.6590</b> | 654.3831        | 1290.6325        | 645.3199        | 1289.6484        | 645.3279         | 12 |
| 6  | 678.3213         | 339.6643        | 661.2948         | 331.1510        | <b>660.3108</b>  | 330.6590         | E    | <b>1250.6375</b> | <b>625.8224</b> | 1233.6110        | 617.3091        | 1232.6270        | 616.8171         | 11 |
| 7  | 749.3585         | 375.1829        | <b>732.3319</b>  | 366.6696        | <b>731.3479</b>  | 366.1776         | A    | <b>1121.5949</b> | 561.3011        | 1104.5684        | 552.7878        | 1103.5844        | 552.2958         | 10 |
| 8  | <b>933.4796</b>  | 467.2435        | 916.4531         | 458.7302        | <b>915.4631</b>  | 458.2382         | K    | <b>1050.5578</b> | 525.7826        | 1033.5313        | 517.2693        | 1032.5473        | 516.7773         | 9  |
| 9  | <b>1030.5324</b> | 515.7698        | 1013.5059        | 507.2566        | 1012.5218        | 506.7646         | P    | <b>866.4367</b>  | 433.7220        | 849.4101         | 425.2087        | <b>848.4261</b>  | 424.7167         | 8  |
| 10 | <b>1159.5750</b> | 580.2911        | <b>1142.5484</b> | 571.7779        | <b>1141.5644</b> | 571.2859         | E    | <b>769.3839</b>  | 385.1956        | 752.3573         | 376.6823        | 751.3733         | 376.1903         | 7  |
| 11 | <b>1256.6278</b> | 628.3175        | 1239.6012        | 620.3042        | 1238.6172        | 619.8122         | P    | <b>640.3413</b>  | 320.6743        | 623.3148         | <b>312.1610</b> | 622.3307         | 311.6690         | 6  |
| 12 | 1343.6598        | 672.3335        | 1326.6332        | 663.8203        | <b>1325.6492</b> | 663.3282         | S    | <b>543.2885</b>  | <b>272.1479</b> | 526.2620         | 263.6346        | 525.2780         | 263.1426         | 5  |
| 13 | 1440.7126        | 720.8599        | <b>1423.6860</b> | 712.3466        | <b>1422.7020</b> | 711.8546         | P    | <b>456.2565</b>  | 228.6319        | 439.2300         | 220.1186        | 438.2459         | 219.6266         | 4  |
| 14 | <b>1527.7446</b> | 764.3759        | <b>1510.7180</b> | 755.8627        | <b>1509.7340</b> | 755.3706         | S    | <b>359.2037</b>  | 180.1055        | 342.1772         | 171.5922        | <b>341.1932</b>  | 171.1002         | 3  |
| 15 | <b>1624.7973</b> | 812.9023        | 1607.7708        | 804.3890        | 1606.7868        | 803.8970         | P    | <b>272.1717</b>  | 136.5895        | 255.1452         | 128.0762        |                  |                  | 2  |
| 16 |                  |                 |                  |                 |                  |                  | R    | 175.1190         | 88.0631         | 158.0924         | 79.5498         |                  |                  | 1  |

Match to Query 12342: 1668.949068 from(835.481810,2+) intensity(71590.4922)

Title: File2129 Spectrum13072 scans: 14280

Data file I:\2013-12-03-SIMM7721-FR1-8-ZW.mgf

Click mouse within plot area to zoom in by factor of two about that point

Or,   to  Da Label all possible matches  Label matches used for scoring 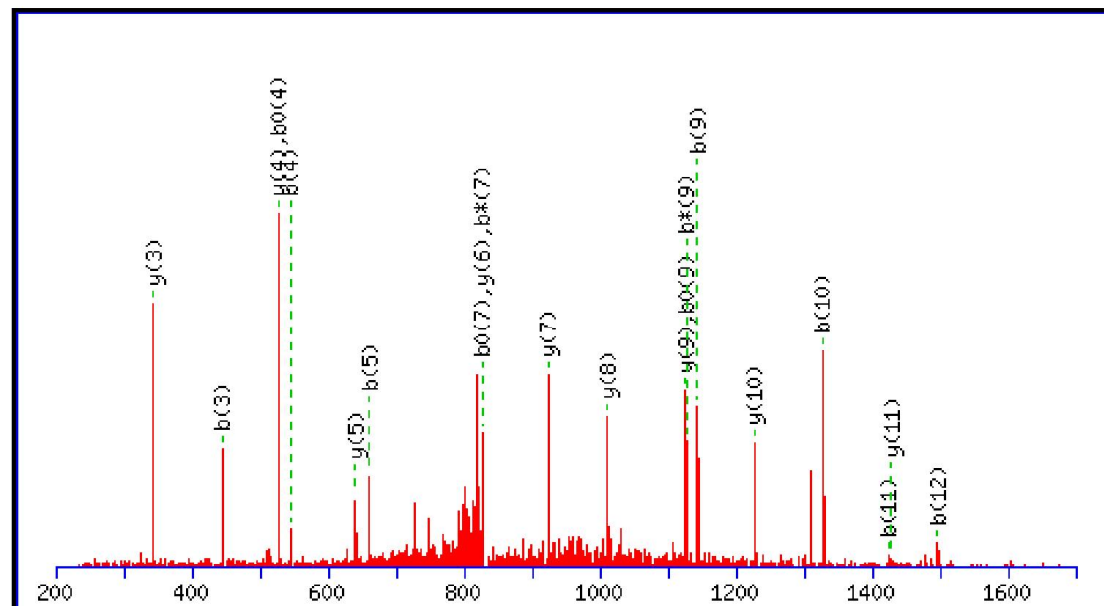**Monoisotopic mass of neutral peptide Mr(calc): 1668.****Fixed modifications:** Carbamidomethyl (C) (apply to speci**Variable modifications:****K1** : Propionyl (K)**K3** : Propionyl-(13CD3)Methyl (K)**K10** : Propionyl (K)**Ions Score:** 60 **Expect:** 0.00051**Matches** : 21/124 fragment ions using 29 most intense peak:

| #  | b                | b <sup>++</sup> | b*               | b <sup>++</sup> | b <sup>0</sup>   | b <sup>0++</sup> | Seq. | y                | y <sup>++</sup> | y*        | y <sup>++</sup> | y <sup>0</sup> | y <sup>0++</sup> | #  |
|----|------------------|-----------------|------------------|-----------------|------------------|------------------|------|------------------|-----------------|-----------|-----------------|----------------|------------------|----|
| 1  | 185.1285         | 93.0679         | 168.1019         | 84.5546         |                  |                  | K    |                  |                 |           |                 |                |                  | 13 |
| 2  | 242.1499         | 121.5786        | 225.1234         | 113.0653        |                  |                  | G    | 1485.8333        | 743.4203        | 1468.8067 | 734.9070        | 1467.8227      | 734.4150         | 12 |
| 3  | <b>444.3089</b>  | 222.6581        | 427.2824         | 214.1448        |                  |                  | K    | <b>1428.8118</b> | 714.9095        | 1411.7853 | 706.3963        | 1410.8012      | 705.9043         | 11 |
| 4  | <b>545.3566</b>  | 273.1819        | 528.3301         | 264.6687        | <b>527.3460</b>  | 264.1767         | T    | <b>1226.6528</b> | 613.8300        | 1209.6263 | 605.3168        | 1208.6422      | 604.8248         | 10 |
| 5  | <b>660.3836</b>  | 330.6954        | 643.3570         | 322.1821        | 642.3730         | 321.6901         | D    | <b>1125.6051</b> | 563.3062        | 1108.5786 | 554.7929        | 1107.5946      | 554.3009         | 9  |
| 6  | 747.4156         | 374.2114        | 730.3890         | 365.6982        | 729.4050         | 365.2061         | S    | <b>1010.5782</b> | 505.7927        | 993.5516  | 497.2795        | 992.5676       | 496.7874         | 8  |
| 7  | 844.4683         | 422.7378        | <b>827.4418</b>  | 414.2245        | <b>826.4578</b>  | 413.7325         | P    | <b>923.5461</b>  | 462.2767        | 906.5196  | 453.7634        |                |                  | 7  |
| 8  | 1030.5477        | 515.7775        | 1013.5211        | 507.2642        | 1012.5371        | 506.7722         | W    | <b>826.4934</b>  | 413.7503        | 809.4668  | 405.2371        |                |                  | 6  |
| 9  | <b>1143.6317</b> | 572.3195        | <b>1126.6052</b> | 563.8062        | <b>1125.6212</b> | 563.3142         | I    | <b>640.4141</b>  | 320.7107        | 623.3875  | 312.1974        |                |                  | 5  |
| 10 | <b>1327.7529</b> | 664.3801        | 1310.7264        | 655.8668        | 1309.7423        | 655.3748         | K    | <b>527.3300</b>  | 264.1686        | 510.3035  | 255.6554        |                |                  | 4  |
| 11 | <b>1424.8057</b> | 712.9065        | 1407.7791        | 704.3932        | 1406.7951        | 703.9012         | P    | <b>343.2088</b>  | 172.1081        | 326.1823  | 163.5948        |                |                  | 3  |
| 12 | <b>1495.8428</b> | 748.4250        | 1478.8162        | 739.9118        | 1477.8322        | 739.4197         | A    | 246.1561         | 123.5817        | 229.1295  | 115.0684        |                |                  | 2  |
| 13 |                  |                 |                  |                 |                  |                  | R    | 175.1190         | 88.0631         | 158.0924  | 79.5498         |                |                  | 1  |



Found in **Q8N3V7**, Synaptodin OS=Homo sapiens GN=SYNPO PE=1 SV=2

Match to Query 320: 743.457008 from(372.735780,2+) intensity(68476.3047)

Title: File2131 Spectrum2963 scans: 3607

Data file I:\2013-12-03-SIMM7721-FR1-9-ZW.mgf

Click mouse within plot area to zoom in by factor of two about that point

Or,   to  Da Label all possible matches  Label matches used for scoring 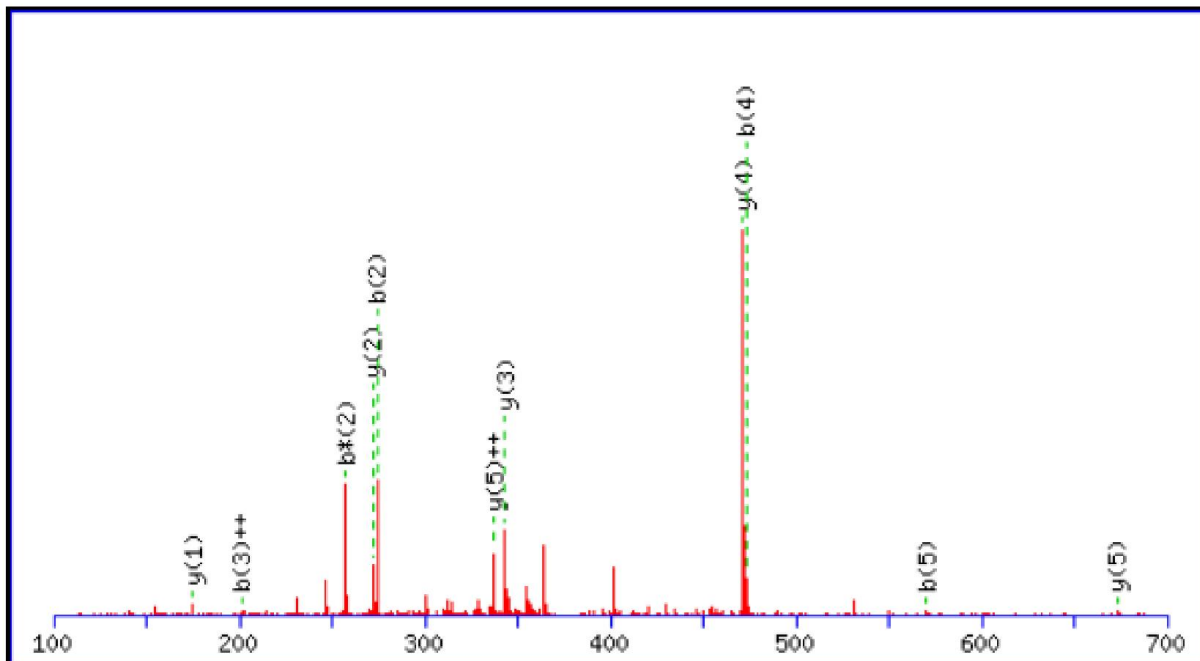

Monoisotopic mass of neutral peptide Mr(calc): 743.4

Fixed modifications: Carbamidomethyl (C) (apply to s

Variable modifications:

K2 : Propionyl-(13CD3)Methyl (K)

Ions Score: 36 Expect: 0.07

Matches : 11/38 fragment ions using 18 most intense

| # | b               | b <sup>++</sup> | b <sup>*</sup> | b <sup>*++</sup> | Seq. | y               | y <sup>++</sup> | y <sup>*</sup> | y <sup>*++</sup> | # |
|---|-----------------|-----------------|----------------|------------------|------|-----------------|-----------------|----------------|------------------|---|
| 1 | 72.0444         | 36.5258         |                |                  | A    |                 |                 |                |                  | 6 |
| 2 | <b>274.2034</b> | 137.6053        | 257.1769       | 129.0921         | K    | <b>673.4264</b> | <b>337.2168</b> | 656.3999       | 328.7036         | 5 |
| 3 | 402.2620        | <b>201.6346</b> | 385.2354       | 193.1214         | Q    | <b>471.2674</b> | 236.1373        | 454.2409       | 227.6241         | 4 |
| 4 | <b>473.2991</b> | 237.1532        | 456.2725       | 228.6399         | A    | <b>343.2088</b> | 172.1081        | 326.1823       | 163.5948         | 3 |
| 5 | <b>570.3519</b> | 285.6796        | 553.3253       | 277.1663         | P    | <b>272.1717</b> | 136.5895        | 255.1452       | 128.0762         | 2 |
| 6 |                 |                 |                |                  | R    | <b>175.1190</b> | 88.0631         | 158.0924       | 79.5498          | 1 |

Match to Query 14575: 1874.958348 from(938.486450,2+) intensity(9935.7207)

Title: File2131 Spectrum8215 scans: 9130

Data file I:\2013-12-03-SIMM7721-FR1-9-ZW.mgf

Click mouse within plot area to zoom in by factor of two about that point

Or, Plot from  to  Da

Label all possible matches  Label matches used for scoring

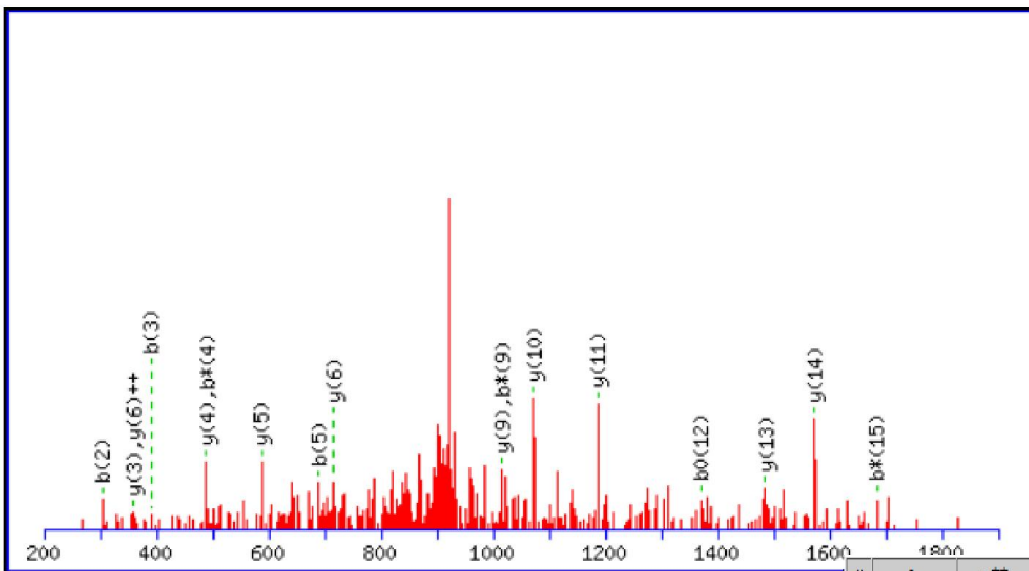

Monoisotopic mass of neutral peptide Mr(calc): 1874.9606

Fixed modifications: Carbamidomethyl (C) (apply to specified)

Variable modifications:

K2 : Propionyl-(13CD3)Methyl (K)

K5 : Propionyl (K)

Ions Score: 48 Expect: 0.0085

Matches : 17/172 fragment ions using 31 most intense peaks

| #  | b               | b <sup>++</sup> | b <sup>*</sup>   | b <sup>*++</sup> | b <sup>0</sup>   | b <sup>0++</sup> | Seq. | y                | y <sup>++</sup> | y <sup>*</sup> | y <sup>*++</sup> | y <sup>0</sup> | y <sup>0++</sup> | #  |
|----|-----------------|-----------------|------------------|------------------|------------------|------------------|------|------------------|-----------------|----------------|------------------|----------------|------------------|----|
| 1  | 102.0550        | 51.5311         |                  |                  | 84.0444          | 42.5258          | T    |                  |                 |                |                  |                |                  | 16 |
| 2  | <b>304.2140</b> | 152.6106        | 287.1874         | 144.0973         | 286.2034         | 143.6053         | K    | 1774.9203        | 887.9638        | 1757.8937      | 879.4505         | 1756.9097      | 878.9585         | 15 |
| 3  | <b>391.2460</b> | 196.1266        | 374.2194         | 187.6134         | 373.2354         | 187.1214         | S    | <b>1572.7612</b> | 786.8843        | 1555.7347      | 778.3710         | 1554.7507      | 777.8790         | 14 |
| 4  | 505.2889        | 253.1481        | <b>488.2624</b>  | 244.6348         | 487.2784         | 244.1428         | N    | <b>1485.7292</b> | 743.3682        | 1468.7027      | 734.8550         | 1467.7186      | 734.3630         | 13 |
| 5  | <b>689.4101</b> | 345.2087        | 672.3836         | 336.6954         | 671.3995         | 336.2034         | K    | 1371.6863        | 686.3468        | 1354.6597      | 677.8335         | 1353.6757      | 677.3415         | 12 |
| 6  | 804.4370        | 402.7222        | 787.4105         | 394.2089         | 786.4265         | 393.7169         | D    | <b>1187.5651</b> | 594.2862        | 1170.5386      | 585.7729         | 1169.5545      | 585.2809         | 11 |
| 7  | 861.4585        | 431.2329        | 844.4320         | 422.7196         | 843.4479         | 422.2276         | G    | <b>1072.5382</b> | 536.7727        | 1055.5116      | 528.2594         | 1054.5276      | 527.7674         | 10 |
| 8  | 918.4800        | 459.7436        | 901.4534         | 451.2303         | 900.4694         | 450.7383         | G    | <b>1015.5167</b> | 508.2620        | 998.4901       | 499.7487         | 997.5061       | 499.2567         | 9  |
| 9  | 1032.5229       | 516.7651        | <b>1015.4964</b> | 508.2518         | 1014.5123        | 507.7598         | N    | 958.4952         | 479.7513        | 941.4687       | 471.2380         | 940.4847       | 470.7460         | 8  |
| 10 | 1160.5815       | 580.7944        | 1143.5549        | 572.2811         | 1142.5709        | 571.7891         | Q    | 844.4523         | 422.7298        | 827.4258       | 414.2165         | 826.4417       | 413.7245         | 7  |
| 11 | 1289.6241       | 645.3157        | 1272.5975        | 636.8024         | 1271.6135        | 636.3104         | E    | <b>716.3937</b>  | <b>358.7005</b> | 699.3672       | 350.1872         | 698.3832       | 349.6952         | 6  |
| 12 | 1388.6925       | 694.8499        | 1371.6659        | 686.3366         | <b>1370.6819</b> | 685.8446         | V    | <b>587.3511</b>  | 294.1792        | 570.3262       | 285.6659         | 569.3406       | 285.1739         | 5  |
| 13 | 1517.7351       | 759.3712        | 1500.7085        | 750.8579         | 1499.7245        | 750.3659         | E    | <b>488.2827</b>  | 244.6450        | 471.2562       | 236.1317         | 470.2722       | 235.6397         | 4  |
| 14 | 1630.8191       | 815.9132        | 1613.7926        | 807.3999         | 1612.8086        | 806.9079         | I    | <b>359.2401</b>  | 180.1237        | 342.2136       | 171.6104         |                |                  | 3  |
| 15 | 1701.8563       | 851.4318        | <b>1684.8297</b> | 842.9185         | 1683.8457        | 842.4265         | A    | 246.1561         | 123.5817        | 229.1295       | 115.0684         |                |                  | 2  |
| 16 |                 |                 |                  |                  |                  |                  | R    | 175.1190         | 88.0631         | 158.0924       | 79.5498          |                |                  | 1  |

Match to Query 8402: 1527.779028 from(764.896790, 2+) intensity(164002.6094)

Title: File2121 Spectrum4120 scans: 5330

Data file I:\2013-12-03-SIMM7721-FR1-5-ZW.mgf

Click mouse within plot area to zoom in by factor of two about that point

Or,   to  Da Label all possible matches  Label matches used for scoring 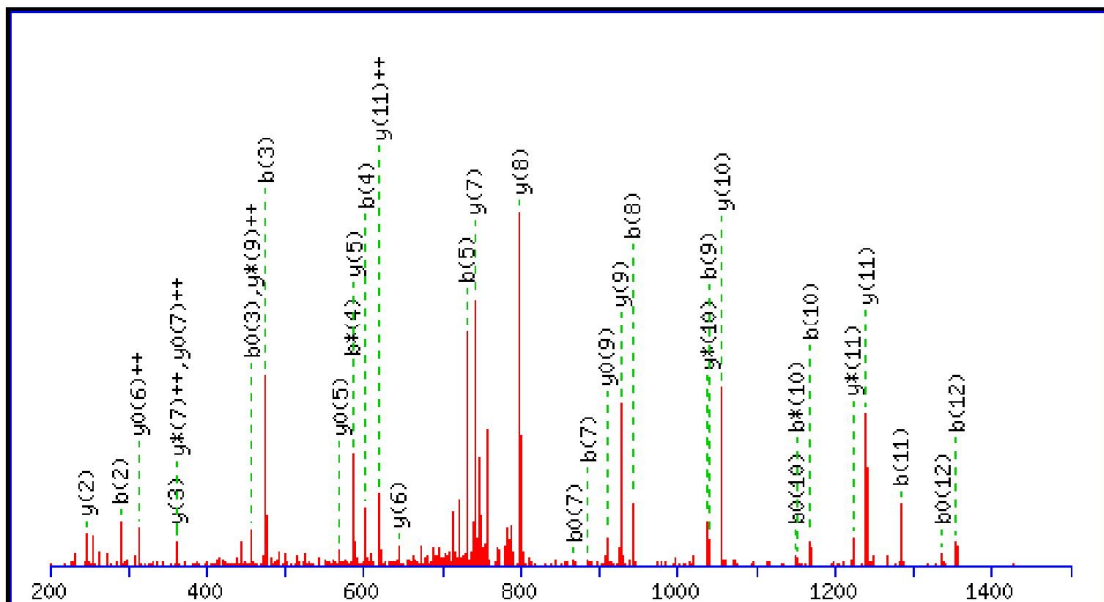

Monoisotopic mass of neutral peptide Mr(calc): 1527.779028

Fixed modifications: Carbamidomethyl (C) (apply to specific residues)

Variable modifications:

K2 : Propionyl-(13C3)Methyl (K)

K3 : Propionyl (K)

Ions Score: 71 Expect: 3.3e-005

Matches : 34/138 fragment ions using 49 most intense peaks

| #  | b                | b <sup>++</sup> | b*               | b <sup>++</sup> | b <sup>0</sup>   | b <sup>0++</sup> | Seq. | y                | y <sup>++</sup> | y*               | y <sup>++</sup> | y <sup>0</sup>  | y <sup>0++</sup> | #  |
|----|------------------|-----------------|------------------|-----------------|------------------|------------------|------|------------------|-----------------|------------------|-----------------|-----------------|------------------|----|
| 1  | 88.0393          | 44.5233         |                  |                 | 70.0287          | 35.5180          | S    |                  |                 |                  |                 |                 |                  | 13 |
| 2  | <b>290.1983</b>  | 145.6028        | 278.1718         | 137.0895        | 272.1878         | 136.5975         | K    | 1441.7554        | 721.3813        | 1424.7289        | 712.8681        | 1423.7449       | 712.3761         | 12 |
| 3  | <b>474.3195</b>  | 237.6634        | 457.2929         | 229.1501        | <b>456.3089</b>  | 228.6581         | K    | <b>1239.5964</b> | <b>620.3018</b> | <b>1222.5699</b> | 611.7886        | 1221.5858       | 611.2966         | 11 |
| 4  | <b>602.3787</b>  | 301.6927        | <b>585.3515</b>  | 293.1794        | 584.3675         | 292.6874         | Q    | <b>1055.4752</b> | 528.2413        | <b>1038.4487</b> | 519.7280        | 1037.4647       | 519.2360         | 10 |
| 5  | <b>731.4207</b>  | 366.2140        | 714.3941         | 357.7007        | 713.4101         | 357.2087         | E    | <b>927.4167</b>  | 464.2120        | 910.3901         | <b>455.6987</b> | <b>909.4061</b> | 455.2067         | 9  |
| 6  | 788.4421         | 394.7247        | 771.4156         | 386.2114        | 770.4316         | 385.7194         | G    | <b>798.3741</b>  | 399.6907        | 781.3475         | 391.1774        | 780.3635        | 390.6854         | 8  |
| 7  | <b>885.4949</b>  | 443.2511        | 868.4683         | 434.7378        | <b>867.4843</b>  | 434.2458         | P    | <b>741.3526</b>  | 371.1799        | 724.3260         | <b>362.6667</b> | 723.3420        | <b>362.1747</b>  | 7  |
| 8  | <b>942.5164</b>  | 471.7618        | 925.4898         | 463.2485        | 924.5058         | 462.7565         | G    | <b>644.2998</b>  | 322.6536        | 627.2733         | 314.1403        | 626.2893        | <b>313.6483</b>  | 6  |
| 9  | <b>1039.5697</b> | 520.2882        | 1022.5426        | 511.7749        | 1021.5586        | 511.2829         | P    | <b>587.2784</b>  | 294.1428        | 570.2518         | 285.6295        | <b>569.2678</b> | 285.1375         | 5  |
| 10 | <b>1168.6117</b> | 584.8095        | <b>1151.5852</b> | 576.2962        | <b>1150.6012</b> | 575.8042         | E    | 490.2256         | 245.6164        | 473.1991         | 237.1032        | 472.2150        | 236.6112         | 4  |
| 11 | <b>1283.6387</b> | 642.3230        | 1266.6121        | 633.8097        | 1265.6281        | 633.3177         | D    | <b>361.1830</b>  | 181.0951        | 344.1565         | 172.5819        | 343.1724        | 172.0899         | 3  |
| 12 | <b>1354.6758</b> | 677.8415        | 1337.6492        | 669.3282        | <b>1336.6652</b> | 668.8362         | A    | <b>246.1561</b>  | 123.5817        | 229.1295         | 115.0684        |                 |                  | 2  |
| 13 |                  |                 |                  |                 |                  |                  | R    | 175.1190         | 88.0631         | 158.0924         | 79.5498         |                 |                  | 1  |

MS/MS Fragmentation of **RVKAKLEGR**

Found in **I3LOC1**, Serine/threonine-protein kinase SMG1 OS=Homo sapiens GN=SMG1 PE=2 SV=1

Match to Query 5251: 1185.750588 from(593.882570, 2+) intensity(288655.0625)

Title: File2121 Spectrum9612 scans: 11085

Data file I:\2013-12-03-SIMM7721-FR1-5-ZW.mgf

Click mouse within plot area to zoom in by factor of two about that point

Or,   to  Da

Label all possible matches  Label matches used for scoring

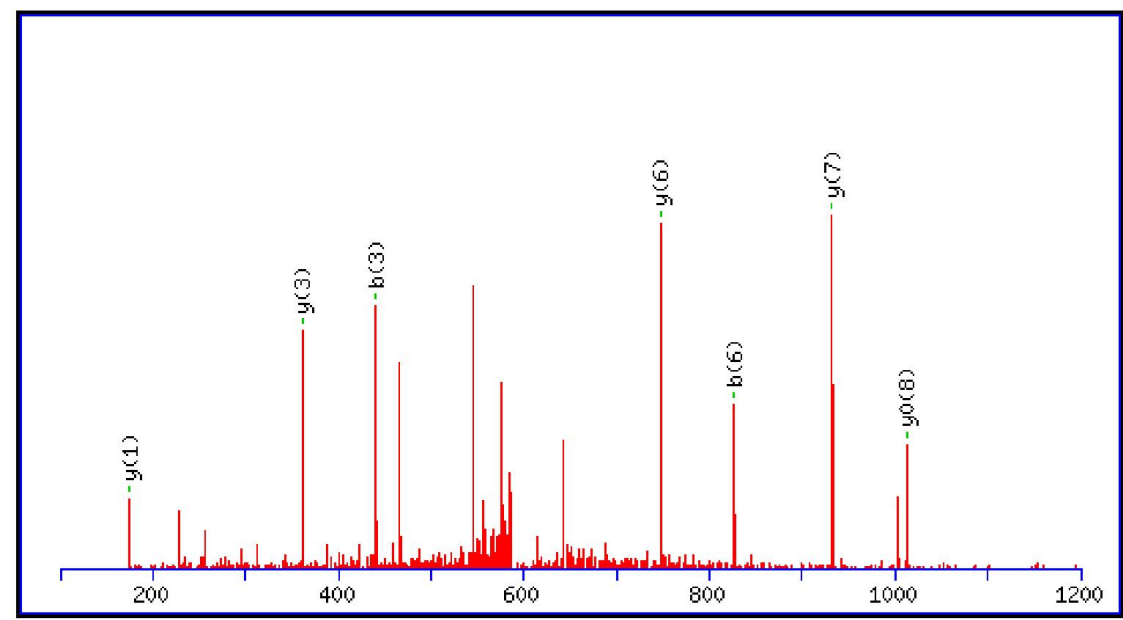

**Monoisotopic mass of neutral peptide Mr(calc):** 1185.7466

**Fixed modifications:** Carbamidomethyl (C) (apply to specified residues or termini only)

**Variable modifications:**

- K3** : Propionyl (K)
- K5** : Propionyl-(13CD3)Methyl (K)

**Ions Score:** 28 **Expect:** 0.19

**Matches :** 8/80 fragment ions using 10 most intense peaks

| # | b         | b <sup>++</sup> | b*       | b <sup>+++</sup> | b <sup>0</sup> | b <sup>0++</sup> | Seq. | y         | y <sup>++</sup> | y*        | y <sup>+++</sup> | y <sup>0</sup> | y <sup>0++</sup> | # |
|---|-----------|-----------------|----------|------------------|----------------|------------------|------|-----------|-----------------|-----------|------------------|----------------|------------------|---|
| 1 | 157.1084  | 79.0578         | 140.0818 | 70.5446          |                |                  | R    |           |                 |           |                  |                |                  | 9 |
| 2 | 256.1768  | 128.5920        | 239.1503 | 120.0788         |                |                  | Y    | 1030.6528 | 515.8300        | 1013.6262 | 507.3168         | 1012.6422      | 506.8248         | 8 |
| 3 | 440.2980  | 220.6526        | 423.2714 | 212.1394         |                |                  | K    | 931.5844  | 466.2958        | 914.5578  | 457.7826         | 913.5738       | 457.2905         | 7 |
| 4 | 511.3351  | 256.1712        | 494.3085 | 247.6579         |                |                  | A    | 747.4632  | 374.2352        | 730.4367  | 365.7220         | 729.4526       | 365.2300         | 6 |
| 5 | 713.4941  | 357.2507        | 696.4676 | 348.7374         |                |                  | K    | 676.4261  | 338.7167        | 659.3995  | 330.2034         | 658.4155       | 329.7114         | 5 |
| 6 | 826.5782  | 413.7927        | 809.5516 | 405.2794         |                |                  | L    | 474.2671  | 237.6372        | 457.2405  | 229.1239         | 456.2565       | 228.6319         | 4 |
| 7 | 955.6208  | 478.3140        | 938.5942 | 469.8007         | 937.6102       | 469.3087         | E    | 361.1830  | 181.0951        | 344.1565  | 172.5819         | 343.1724       | 172.0899         | 3 |
| 8 | 1012.6422 | 506.8248        | 995.6157 | 498.3115         | 994.6317       | 497.8195         | G    | 232.1404  | 116.5738        | 215.1139  | 108.0606         |                |                  | 2 |
| 9 |           |                 |          |                  |                |                  | R    | 175.1190  | 88.0631         | 158.0924  | 79.5498          |                |                  | 1 |

Match to Query 15266: 2207.252532 from(736.758120, 3+) intensity(24746.5586)

Title: File2121 Spectrum10944 scans: 12472

Data file I:\2013-12-03-SIMM7721-FR1-5-ZW.mgf

Click mouse within plot area to zoom in by factor of two about that point

Or,   to  Da Label all possible matches  Label matches used for scoring 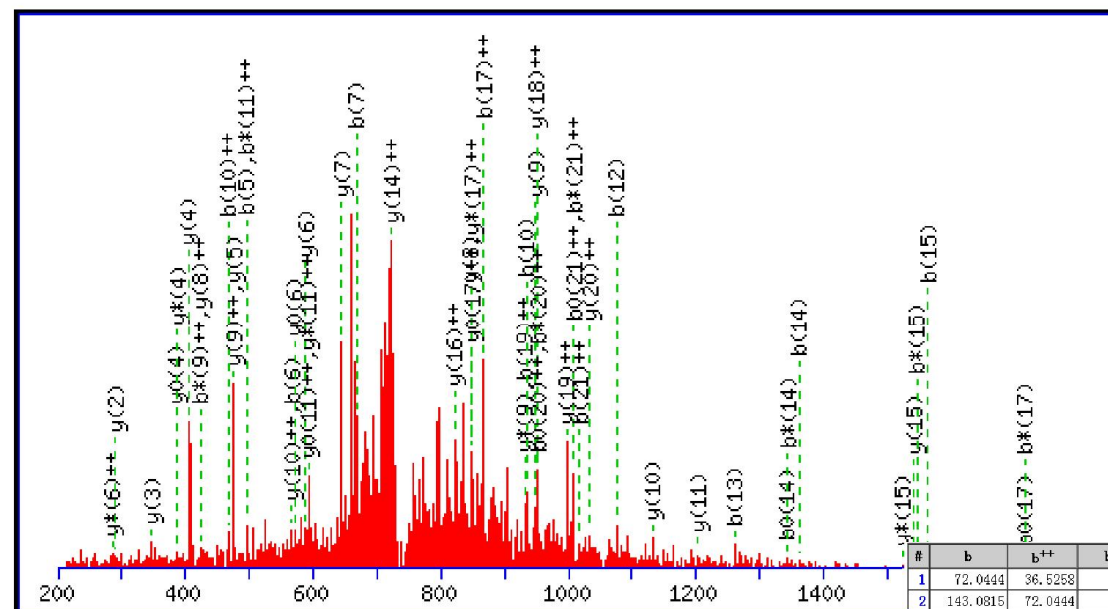**Monoisotopic mass of neutral peptide Mr(calc): 2207.2546****Fixed modifications:** Carbamidomethyl (C) (apply to specified)**Variable modifications:****K5** : Propionyl (K)**K13** : Propionyl (K)**K15** : Propionyl-(13CD3)Methyl (K)**Ions Score:** 26 **Expect:** 1.1**Matches** : 52/230 fragment ions using 145 most intense peaks

| #  | b                | b <sup>++</sup> | b <sup>+</sup> | b <sup>++</sup> | b <sup>0</sup> | b <sup>0++</sup> | Seq. | y                | y <sup>++</sup> | y <sup>+</sup> | y <sup>++</sup> | y <sup>0</sup> | y <sup>0++</sup> | #  |
|----|------------------|-----------------|----------------|-----------------|----------------|------------------|------|------------------|-----------------|----------------|-----------------|----------------|------------------|----|
| 1  | 72.0444          | 36.5258         |                |                 |                |                  | A    |                  |                 |                |                 |                |                  | 22 |
| 2  | 143.0815         | 72.0444         |                |                 |                |                  | A    | 2137.2248        | 1069.1160       | 2120.1983      | 1060.6028       | 2119.2143      | 1060.1108        | 21 |
| 3  | 214.1186         | 107.5629        |                |                 |                |                  | A    | 2066.1877        | 1033.5975       | 2049.1612      | 1025.0842       | 2048.1771      | 1024.5922        | 20 |
| 4  | 311.1714         | 156.0893        |                |                 |                |                  | P    | 1995.1506        | 998.0789        | 1978.1240      | 989.5657        | 1977.1400      | 989.0737         | 19 |
| 5  | <b>495.2926</b>  | 248.1499        | 478.2660       | 239.6366        |                |                  | K    | 1898.0978        | 949.5526        | 1881.0713      | 941.0393        | 1880.0873      | 940.5473         | 18 |
| 6  | <b>566.3297</b>  | 283.6685        | 549.3031       | 275.1552        |                |                  | A    | 1713.9766        | 857.4920        | 1696.9501      | 848.9787        | 1695.9661      | 848.4867         | 17 |
| 7  | <b>667.3774</b>  | 334.1923        | 659.3508       | 325.6790        | 649.3668       | 325.1870         | T    | 1642.9395        | 821.9734        | 1625.9130      | 813.4601        | 1624.9290      | 812.9681         | 16 |
| 8  | 764.4301         | 382.7187        | 747.4036       | 374.2054        | 746.4196       | 373.7134         | P    | <b>1541.8919</b> | 771.4496        | 1524.8653      | 762.9363        | 1523.8813      | 762.4443         | 15 |
| 9  | 863.4985         | 432.2529        | 846.4720       | 423.7396        | 845.4880       | 423.2476         | Y    | 1444.8391        | 722.9232        | 1427.8125      | 714.4099        | 1426.8285      | 713.9179         | 14 |
| 10 | <b>934.5356</b>  | 467.7715        | 917.5091       | 459.2582        | 916.5251       | 458.7662         | A    | 1345.7707        | 673.3890        | 1328.7441      | 664.8757        | 1327.7601      | 664.3837         | 13 |
| 11 | 1005.5728        | 503.2900        | 988.5462       | 494.7767        | 987.5622       | 494.2847         | A    | 1274.7336        | 637.8704        | 1257.7070      | 629.3571        | 1256.7230      | 628.8651         | 12 |
| 12 | <b>1076.6099</b> | 538.8086        | 1059.5833      | 530.2953        | 1058.5993      | 529.8033         | A    | <b>1203.6964</b> | 602.3519        | 1186.6699      | 593.8386        | 1185.6859      | 593.3466         | 11 |
| 13 | <b>1260.7311</b> | 630.8692        | 1243.7045      | 622.3559        | 1242.7205      | 621.8639         | K    | <b>1132.6593</b> | 566.8333        | 1115.6328      | 558.3200        | 1114.6488      | 557.8280         | 10 |
| 14 | <b>1361.7787</b> | 681.3930        | 1344.7522      | 672.8797        | 1343.7682      | 672.3877         | T    | <b>948.5382</b>  | 474.7727        | 931.5116       | 466.2594        | 930.5276       | 465.7674         | 9  |
| 15 | <b>1563.9377</b> | 782.4725        | 1546.9112      | 773.9592        | 1545.9272      | 773.4672         | K    | <b>847.4905</b>  | 424.2489        | 830.4639       | 415.7356        | 829.4799       | 415.2436         | 8  |
| 16 | 1620.9592        | 810.9832        | 1603.9327      | 802.4700        | 1602.9486      | 801.9780         | G    | <b>645.3315</b>  | 323.1694        | 628.3049       | 314.6561        | 627.3209       | 314.1641         | 7  |
| 17 | 1734.0433        | 867.5253        | 1717.0167      | 859.0120        | 1716.0327      | 858.5200         | L    | <b>588.3100</b>  | 294.6586        | 571.2835       | 286.1454        | 570.2994       | 285.6534         | 6  |
| 18 | 1805.0804        | 903.0438        | 1788.0538      | 894.5306        | 1787.0698      | 894.0385         | A    | <b>475.2259</b>  | 238.1166        | 458.1994       | 229.6039        | 457.2154       | 229.1113         | 5  |
| 19 | 1862.1018        | 931.5546        | 1845.0753      | 923.0413        | 1844.0913      | 922.5493         | G    | <b>404.1888</b>  | 202.5980        | 387.1623       | 194.0848        | 386.1783       | 193.5928         | 4  |
| 20 | 1919.1233        | 960.0653        | 1902.0968      | 951.5520        | 1901.1127      | 951.0600         | G    | <b>347.1674</b>  | 174.0873        | 330.1408       | 165.5740        | 329.1568       | 165.0820         | 3  |
| 21 | 2034.1503        | 1017.5788       | 2017.1237      | 1009.0655       | 2016.1397      | 1008.5735        | D    | <b>290.1459</b>  | 145.5766        | 273.1193       | 137.0633        | 272.1353       | 136.5713         | 2  |
| 22 |                  |                 |                |                 |                |                  | R    | 175.1190         | 88.0631         | 158.0924       | 79.5498         |                |                  | 1  |

MS/MS Fragmentation of **RKKSFR**

Found in **Q92796-2**, Isoform 2 of Disks large homolog 3 OS=Homo sapiens GN=DLG3

Match to Query 2226: 950.592068 from(476.303310,2+) intensity(70319.4375)

Title: File2124 Spectrum3814 scans: 4631

Data file I:\2013-12-03-SIMM7721-FR1-6-ZW.mgf

Click mouse within plot area to zoom in by factor of two about that point

Or,   to  Da

Label all possible matches  Label matches used for scoring

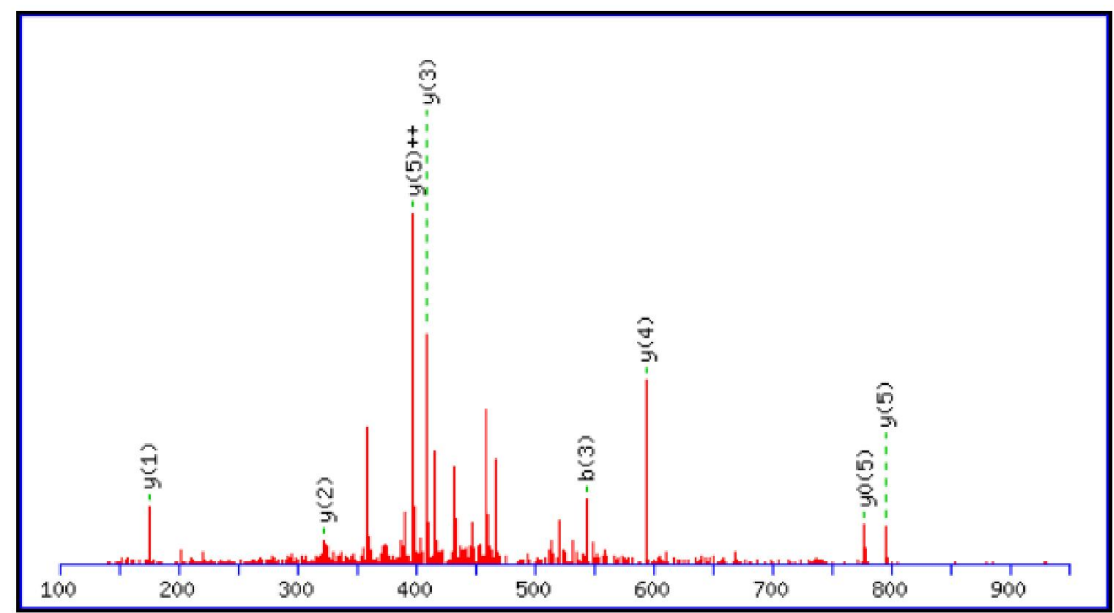

Monoisotopic mass of neutral peptide **Mr(calc)**: 950.5934

Fixed modifications: Carbamidomethyl (C) (apply to specified residues or termini only)

Variable modifications:

K2 : Propionyl-(13CD3)Methyl (K)

K3 : Propionyl (K)

Ions Score: 32 Expect: 0.11

Matches : 9/50 fragment ions using 16 most intense peaks

| # | b        | b <sup>++</sup> | b*       | b <sup>*++</sup> | b <sup>0</sup> | b <sup>0++</sup> | Seq. | y        | y <sup>++</sup> | y*       | y <sup>*++</sup> | y <sup>0</sup> | y <sup>0++</sup> | # |
|---|----------|-----------------|----------|------------------|----------------|------------------|------|----------|-----------------|----------|------------------|----------------|------------------|---|
| 1 | 157.1084 | 79.0578         | 140.0818 | 70.5446          |                |                  | R    |          |                 |          |                  |                |                  | 6 |
| 2 | 359.2674 | 180.1373        | 342.2409 | 171.6241         |                |                  | K    | 795.4996 | 398.2534        | 778.4730 | 389.7402         | 777.4890       | 389.2481         | 5 |
| 3 | 543.3886 | 272.1979        | 526.3620 | 263.6847         |                |                  | K    | 593.3406 | 297.1739        | 576.3140 | 288.6606         | 575.3300       | 288.1686         | 4 |
| 4 | 630.4206 | 315.7139        | 613.3941 | 307.2007         | 612.4100       | 306.7087         | S    | 409.2194 | 205.1133        | 392.1928 | 196.6001         | 391.2088       | 196.1081         | 3 |
| 5 | 777.4890 | 389.2481        | 760.4625 | 380.7349         | 759.4785       | 380.2429         | F    | 322.1874 | 161.5973        | 305.1608 | 153.0840         |                |                  | 2 |
| 6 |          |                 |          |                  |                |                  | R    | 175.1190 | 88.0631         | 158.0924 | 79.5498          |                |                  | 1 |

Match to Query 11571: 1629.872768 from(815.943660,2+) intensity(156271.4219)

Title: File2124 Spectrum8636 scans: 9746

Data file I:\2013-12-03-SIMM7721-FR1-6-ZW.mgf

Click mouse within plot area to zoom in by factor of two about that point

Or,   to  Da Label all possible matches  Label matches used for scoring 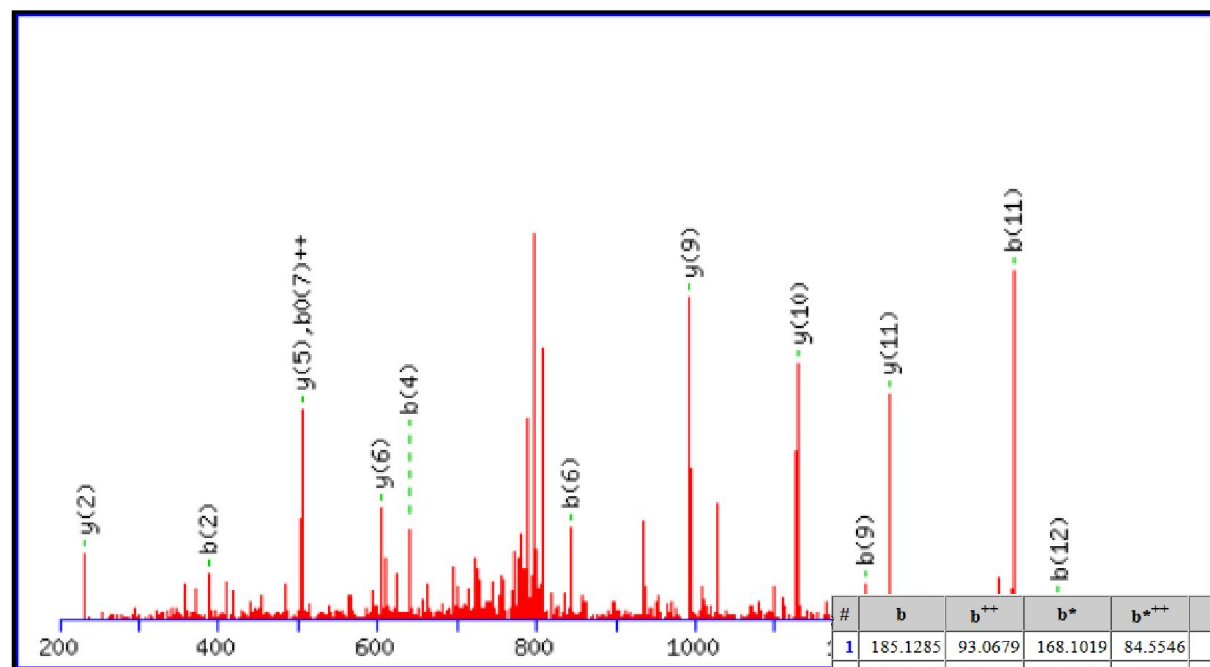

Monoisotopic mass of neutral peptide Mr(calc): 1629

Fixed modifications: Carbamidomethyl (C) (apply to

Variable modifications:

K1 : Propionyl (K)

K2 : Propionyl-(13CD3)Methyl (K)

K7 : Propionyl (K)

Ions Score: 68 Expect: 9.9e-005

Matches : 13/136 fragment ions using 14 most intens

| #  | b                | b <sup>++</sup> | b <sup>*</sup> | b <sup>***</sup> | b <sup>0</sup> | b <sup>0++</sup> | Seq. | y                | y <sup>++</sup> | y <sup>*</sup> | y <sup>***</sup> | y <sup>0</sup> | y <sup>0++</sup> | #  |
|----|------------------|-----------------|----------------|------------------|----------------|------------------|------|------------------|-----------------|----------------|------------------|----------------|------------------|----|
| 1  | 185.1285         | 93.0679         | 168.1019       | 84.5546          |                |                  | K    |                  |                 |                |                  |                |                  | 13 |
| 2  | <b>387.2875</b>  | 194.1474        | 370.2609       | 185.6341         |                |                  | K    | 1446.7608        | 723.8841        | 1429.7343      | 715.3708         | 1428.7503      | 714.8788         | 12 |
| 3  | 502.3144         | 251.6608        | 485.2879       | 243.1476         | 484.3038       | 242.6556         | D    | <b>1244.6018</b> | 622.8046        | 1227.5753      | 614.2913         | 1226.5913      | 613.7993         | 11 |
| 4  | <b>639.3733</b>  | 320.1903        | 622.3468       | 311.6770         | 621.3628       | 311.1850         | H    | <b>1129.5749</b> | 565.2911        | 1112.5483      | 556.7778         | 1111.5643      | 556.2858         | 10 |
| 5  | 696.3948         | 348.7010        | 679.3682       | 340.1878         | 678.3842       | 339.6957         | G    | <b>992.5160</b>  | 496.7616        | 975.4894       | 488.2483         | 974.5054       | 487.7563         | 9  |
| 6  | <b>843.4632</b>  | 422.2352        | 826.4367       | 413.7220         | 825.4526       | 413.2300         | F    | 935.4945         | 468.2509        | 918.4680       | 459.7376         | 917.4839       | 459.2456         | 8  |
| 7  | 1027.5844        | 514.2958        | 1010.5578      | 505.7826         | 1009.5738      | <b>505.2905</b>  | K    | 788.4261         | 394.7167        | 771.3995       | 386.2034         | 770.4155       | 385.7114         | 7  |
| 8  | 1126.6528        | 563.8300        | 1109.6262      | 555.3168         | 1108.6422      | 554.8248         | V    | <b>604.3049</b>  | 302.6561        | 587.2784       | 294.1428         | 586.2944       | 293.6508         | 6  |
| 9  | <b>1213.6848</b> | 607.3460        | 1196.6583      | 598.8328         | 1195.6743      | 598.3408         | S    | <b>505.2365</b>  | 253.1219        | 488.2100       | 244.6086         | 487.2259       | 244.1166         | 5  |
| 10 | 1284.7219        | 642.8646        | 1267.6954      | 634.3513         | 1266.7114      | 633.8593         | A    | 418.2045         | 209.6059        | 401.1779       | 201.0926         | 400.1939       | 200.6006         | 4  |
| 11 | <b>1399.7489</b> | 700.3781        | 1382.7223      | 691.8648         | 1381.7383      | 691.3728         | D    | 347.1674         | 174.0873        | 330.1408       | 165.5740         | 329.1568       | 165.0820         | 3  |
| 12 | <b>1456.7703</b> | 728.8888        | 1439.7438      | 720.3755         | 1438.7598      | 719.8835         | G    | <b>232.1404</b>  | 116.5738        | 215.1139       | 108.0606         |                |                  | 2  |
| 13 |                  |                 |                |                  |                |                  | R    | 175.1190         | 88.0631         | 158.0924       | 79.5498          |                |                  | 1  |

Match to Query 4844: 1157.703948 from(579.859250, 2+) intensity(242736.0469)

Title: File2118 Spectrum7457 scans: 8802

Data file I:\2013-12-03-SIMM7721-FR1-4-ZW.mgf

Click mouse within plot area to zoom in by factor of two about that point

Or,   to  Da Label all possible matches  Label matches used for scoring 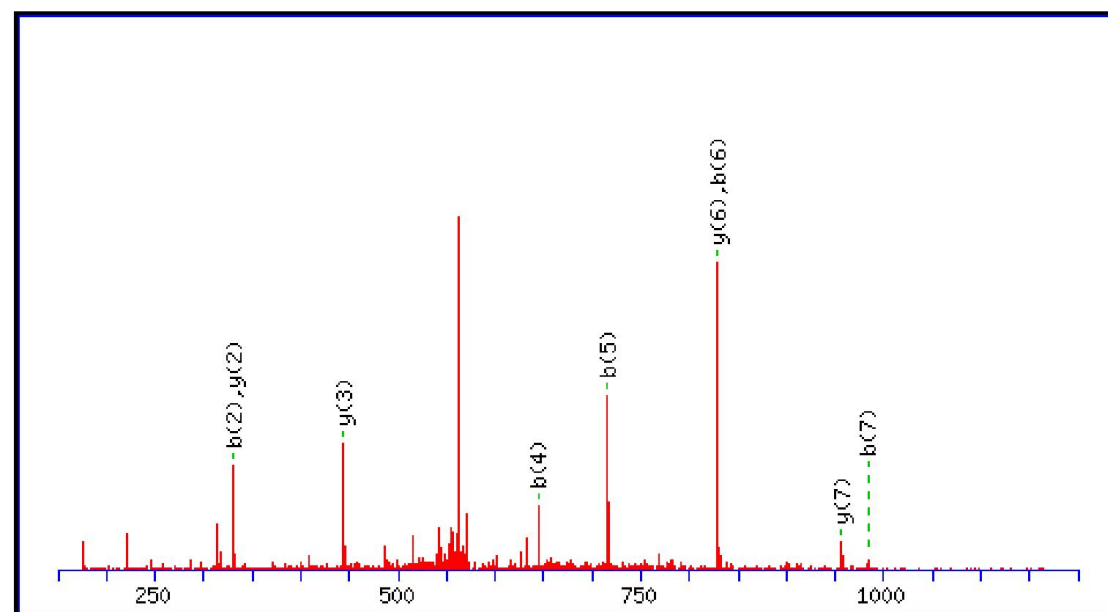Monoisotopic mass of neutral peptide  $M_r(\text{calc})$ : 1157.703948

Fixed modifications: Carbamidomethyl (C) (apply to spec:

Variable modifications:

**K1** : Propionyl-(13CD3)Methyl (K)**K4** : Propionyl (K)

Ions Score: 43 Expect: 0.012

Matches : 9/70 fragment ions using 10 most intense peaks

| # | b               | b <sup>++</sup> | b*       | b <sup>++</sup> | b <sup>0</sup> | b <sup>0++</sup> | Seq. | y               | y <sup>++</sup> | y*       | y <sup>++</sup> | y <sup>0</sup> | y <sup>0++</sup> | # |
|---|-----------------|-----------------|----------|-----------------|----------------|------------------|------|-----------------|-----------------|----------|-----------------|----------------|------------------|---|
| 1 | 203.1663        | 102.0868        | 186.1397 | 93.5735         |                |                  | K    |                 |                 |          |                 |                |                  | 8 |
| 2 | <b>331.2249</b> | 166.1161        | 314.1983 | 157.6028        |                |                  | Q    | <b>956.5636</b> | 478.7854        | 939.5370 | 470.2722        | 938.5530       | 469.7802         | 7 |
| 3 | 460.2675        | 230.6374        | 443.2409 | 222.1241        | 442.2569       | 221.6321         | E    | <b>828.5050</b> | 414.7561        | 811.4785 | 406.2429        | 810.4944       | 405.7509         | 6 |
| 4 | <b>644.3886</b> | 322.6980        | 627.3621 | 314.1847        | 626.3781       | 313.6927         | K    | 699.4624        | 350.2348        | 682.4359 | 341.7216        |                |                  | 5 |
| 5 | <b>715.4258</b> | 358.2165        | 698.3992 | 349.7032        | 697.4152       | 349.2112         | A    | 515.3412        | 258.1743        | 498.3147 | 249.6610        |                |                  | 4 |
| 6 | <b>828.5098</b> | 414.7585        | 811.4833 | 406.2453        | 810.4993       | 405.7533         | L    | <b>444.3041</b> | 222.6557        | 427.2776 | 214.1424        |                |                  | 3 |
| 7 | <b>984.6109</b> | 492.8091        | 967.5844 | 484.2958        | 966.6004       | 483.8038         | R    | <b>331.2201</b> | 166.1137        | 314.1935 | 157.6004        |                |                  | 2 |
| 8 |                 |                 |          |                 |                |                  | R    | 175.1190        | 88.0631         | 158.0924 | 79.5498         |                |                  | 1 |



Found in **Q9NVHO**, Exonuclease 3'-5' domain-containing protein 2 OS=Homo sapiens GN=EXD2 PE=1 SV=2

Match to Query 15089: 2077.085052 from(693.368960, 3+) intensity(52182.6445)

Title: File2118 Spectrum9696 scans: 11134

Data file I:\2013-12-03-SIMM7721-PR1-4-ZW.mgf

Click mouse within plot area to zoom in by factor of two about that point

Or,   to  Da

Label all possible matches  Label matches used for scoring

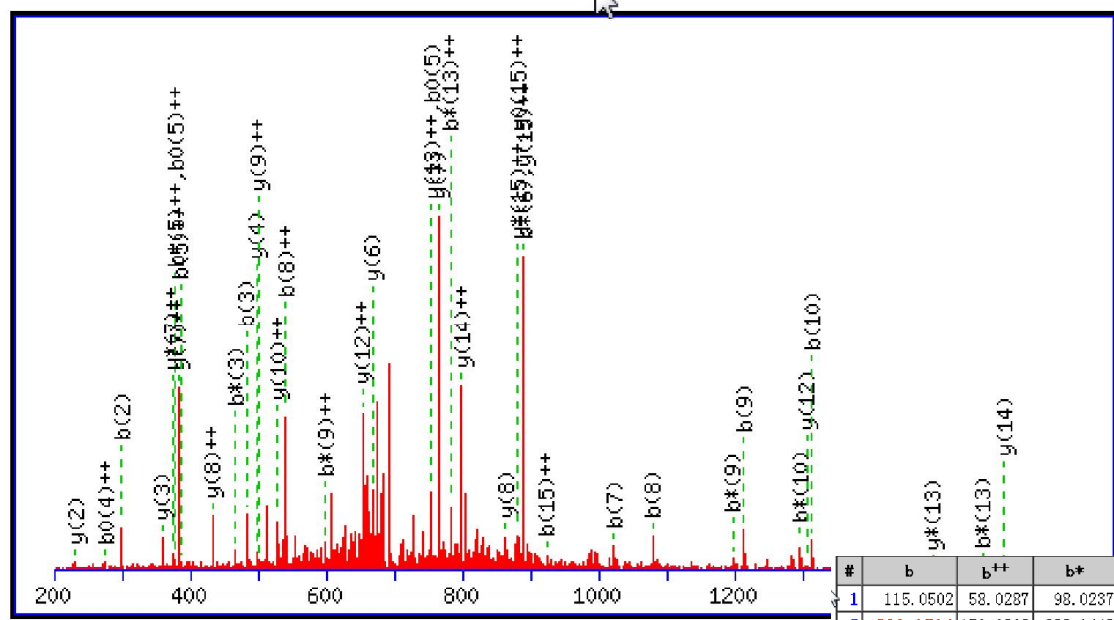

**Monoisotopic mass of neutral peptide Mr(calc): 2077.**

**Fixed modifications:** Carbamidomethyl (C) (apply to speci

**Variable modifications:**

- K2** : Propionyl (K)
- K3** : Propionyl (K)
- K5** : Propionyl-(13CD3)Methyl (K)
- M6** : Label:13C(1)2H(3) (M)
- M9** : Label:13C(1)2H(3) (M)

**Ions Score: 26 Expect: 1.6**

**Matches : 40/166 fragment ions using 100 most intense peak**

| #  | b                | b <sup>++</sup> | b*               | b <sup>+++</sup> | b <sup>0</sup>  | b <sup>0++</sup> | Seq.     | y                | y <sup>++</sup> | y*               | y <sup>+++</sup> | y <sup>0</sup> | y <sup>0++</sup> | #  |
|----|------------------|-----------------|------------------|------------------|-----------------|------------------|----------|------------------|-----------------|------------------|------------------|----------------|------------------|----|
| 1  | 115.0502         | 58.0287         | 98.0237          | 49.5155          |                 |                  | <b>N</b> |                  |                 |                  |                  |                |                  | 17 |
| 2  | <b>299.1714</b>  | 150.0893        | 282.1448         | 141.5761         |                 |                  | <b>K</b> | 1964.0506        | 982.5289        | 1947.0241        | 974.0157         | 1946.0401      | 973.5237         | 16 |
| 3  | <b>483.2926</b>  | 242.1499        | <b>466.2660</b>  | 233.6366         |                 |                  | <b>K</b> | 1779.9294        | <b>890.4684</b> | 1762.9029        | <b>881.9551</b>  | 1761.9189      | <b>881.4631</b>  | 15 |
| 4  | 570.3246         | 285.6659        | 553.2980         | 277.1527         | 552.3140        | <b>276.6606</b>  | <b>S</b> | <b>1595.8083</b> | <b>798.4078</b> | 1578.7817        | 789.3945         | 1577.7977      | 789.4025         | 14 |
| 5  | 772.4836         | <b>386.7454</b> | 755.4571         | <b>378.2322</b>  | <b>754.4730</b> | <b>377.7402</b>  | <b>K</b> | 1508.7762        | <b>754.8918</b> | <b>1491.7497</b> | 746.3785         | 1490.7657      | 745.8865         | 13 |
| 6  | 907.5463         | 454.2768        | <b>890.5197</b>  | 445.7635         | 889.5357        | 445.2715         | <b>N</b> | <b>1306.6172</b> | <b>653.8122</b> | 1289.5907        | 645.2990         | 1288.6067      | 644.8070         | 12 |
| 7  | <b>1022.5732</b> | 511.7902        | 1005.5467        | 503.2770         | 1004.5626       | 502.7850         | <b>D</b> | 1171.5546        | 586.2809        | 1154.5280        | 577.7676         | 1153.5440      | 577.2756         | 11 |
| 8  | <b>1079.5947</b> | <b>540.3010</b> | 1062.5681        | 531.7877         | 1061.5841       | 531.2957         | <b>G</b> | 1056.5276        | <b>528.7674</b> | 1039.5011        | 520.2542         |                |                  | 10 |
| 9  | <b>1214.6573</b> | 607.8323        | <b>1197.6308</b> | <b>599.3190</b>  | 1196.6468       | 598.8270         | <b>N</b> | 999.5061         | <b>500.2567</b> | 982.4796         | 491.7434         |                |                  | 9  |
| 10 | <b>1313.7258</b> | 657.3665        | <b>1296.6992</b> | 648.8532         | 1295.7152       | 648.3612         | <b>V</b> | <b>864.4435</b>  | <b>432.7254</b> | 847.4169         | 424.2121         |                |                  | 8  |
| 11 | 1410.7785        | 705.8929        | 1393.7520        | 697.3796         | 1392.7680       | 696.8876         | <b>P</b> | <b>765.3751</b>  | <b>383.1912</b> | 748.3485         | <b>374.6779</b>  |                |                  | 7  |
| 12 | 1467.8000        | 734.4036        | 1450.7734        | 725.8904         | 1449.7894       | 725.3984         | <b>G</b> | <b>668.3223</b>  | 334.6648        | 651.2957         | 326.1515         |                |                  | 6  |
| 13 | 1581.8429        | 791.4251        | <b>1564.8164</b> | <b>782.9118</b>  | 1563.8324       | 782.4198         | <b>N</b> | 611.3008         | 306.1541        | 594.2743         | 297.6408         |                |                  | 5  |
| 14 | 1718.9018        | 859.9546        | 1701.8753        | 851.4413         | 1700.8913       | 850.9493         | <b>H</b> | <b>497.2579</b>  | 249.1326        | 480.2314         | 240.6193         |                |                  | 4  |
| 15 | 1846.9604        | <b>923.9838</b> | 1829.9339        | 915.4706         | 1828.9498       | 914.9786         | <b>Q</b> | <b>360.1990</b>  | 180.6031        | 343.1724         | 172.0899         |                |                  | 3  |
| 16 | 1903.9819        | 952.4946        | 1886.9553        | 943.9813         | 1885.9713       | 943.4893         | <b>G</b> | <b>232.1404</b>  | 116.5738        | 215.1139         | 108.0606         |                |                  | 2  |
| 17 |                  |                 |                  |                  |                 |                  | <b>R</b> | 175.1190         | 88.0631         | 158.0924         | 79.5498          |                |                  | 1  |

Match to Query 11184: 1636.942848 from(819.478700, 2+) intensity(50295.8867)

Title: File2115 Spectrum8551 scans: 9683

Data file I:\2013-12-03-SIMM7721-FR1-3-ZW.mgf

Click mouse within plot area to zoom in by factor of two about that point

Or,   to  Da Label all possible matches  Label matches used for scoring 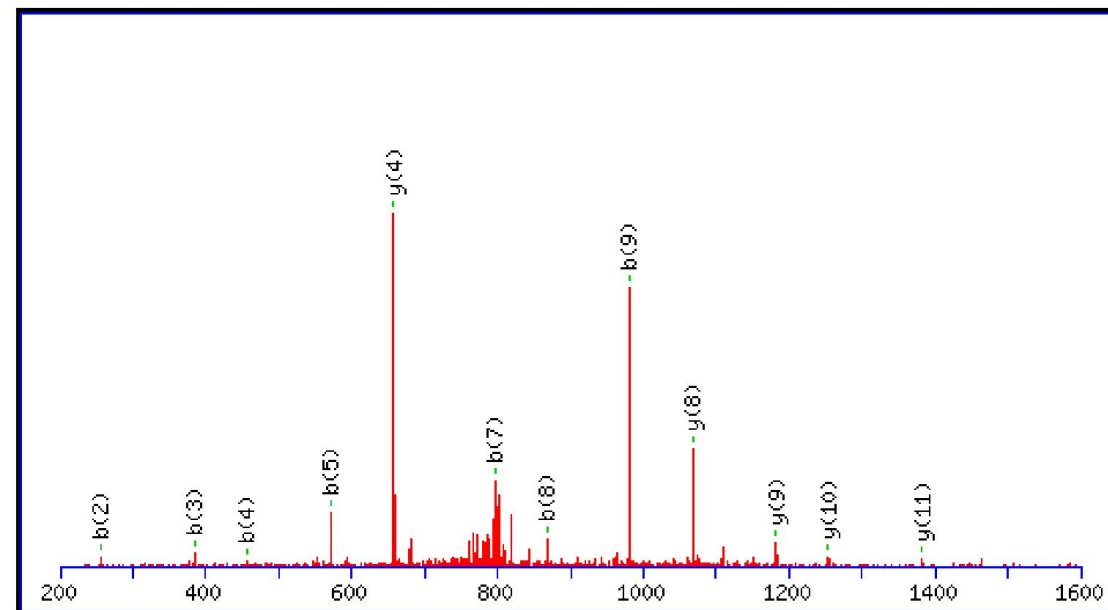Monoisotopic mass of neutral peptide  $M_r(\text{calc})$ : 1636.9420

Fixed modifications: Carbamidomethyl (C) (apply to spec

Variable modifications:

K1 : Propionyl (K)

K11 : Propionyl (K)

K12 : Propionyl-(13CD3)Methyl (K)

Ions Score: 59 Expect: 0.00046

Matches : 12/124 fragment ions using 14 most intense peak

| #  | b               | b <sup>++</sup> | b <sup>+</sup> | b <sup>+++</sup> | b <sup>0</sup> | b <sup>0++</sup> | Seq. | y                | y <sup>++</sup> | y <sup>+</sup> | y <sup>+++</sup> | y <sup>0</sup> | y <sup>0++</sup> | #  |
|----|-----------------|-----------------|----------------|------------------|----------------|------------------|------|------------------|-----------------|----------------|------------------|----------------|------------------|----|
| 1  | 185.1285        | 93.0679         | 168.1019       | 84.5546          |                |                  | K    |                  |                 |                |                  |                |                  | 13 |
| 2  | <b>256.1656</b> | 128.5864        | 239.1390       | 120.0731         |                |                  | A    | 1453.8282        | 727.4177        | 1436.8016      | 718.9045         | 1435.8176      | 718.4125         | 12 |
| 3  | <b>385.2082</b> | 193.1077        | 368.1816       | 184.5944         | 367.1976       | 184.1024         | E    | <b>1382.7911</b> | 691.8992        | 1365.7645      | 683.3859         | 1364.7805      | 682.8939         | 11 |
| 4  | <b>456.2452</b> | 228.6263        | 439.2187       | 220.1130         | 438.2347       | 219.6210         | A    | <b>1253.7485</b> | 627.3779        | 1236.7219      | 618.8646         | 1235.7379      | 618.3726         | 10 |
| 5  | <b>571.2722</b> | 286.1397        | 554.2457       | 277.6265         | 553.2617       | 277.1345         | D    | <b>1182.7114</b> | 591.8593        | 1165.6848      | 583.3460         | 1164.7008      | 582.8540         | 9  |
| 6  | 668.3250        | 334.6661        | 651.2984       | 326.1529         | 650.3144       | 325.6608         | P    | <b>1067.6844</b> | 534.3459        | 1050.6579      | 525.8326         |                |                  | 8  |
| 7  | <b>796.3836</b> | 398.6954        | 779.3570       | 390.1821         | 778.3730       | 389.6901         | Q    | 970.6317         | 485.8195        | 953.6051       | 477.3062         |                |                  | 7  |
| 8  | <b>867.4207</b> | 434.2140        | 850.3941       | 425.7007         | 849.4101       | 425.2087         | A    | 842.5731         | 421.7902        | 825.5465       | 413.2769         |                |                  | 6  |
| 9  | <b>980.5047</b> | 490.7560        | 963.4782       | 482.2427         | 962.4942       | 481.7507         | I    | 771.5360         | 386.2716        | 754.5094       | 377.7583         |                |                  | 5  |
| 10 | 1077.5575       | 539.2824        | 1060.5310      | 530.7691         | 1059.5469      | 530.2771         | P    | <b>658.4519</b>  | 329.7296        | 641.4254       | 321.2163         |                |                  | 4  |
| 11 | 1261.6787       | 631.3430        | 1244.6521      | 622.8297         | 1243.6681      | 622.3377         | K    | 561.3991         | 281.2032        | 544.3726       | 272.6899         |                |                  | 3  |
| 12 | 1463.8377       | 732.4225        | 1446.8111      | 723.9092         | 1445.8271      | 723.4172         | K    | 377.2780         | 189.1426        | 360.2514       | 180.6293         |                |                  | 2  |
| 13 |                 |                 |                |                  |                |                  | R    | 175.1190         | 88.0631         | 158.0924       | 79.5498          |                |                  | 1  |

MS/MS Fragmentation of **DSGPPTKKIR**

Found in **Q9H1E3**, Nuclear ubiquitous casein and cyclin-dependent kinase substrate 1 OS=Homo sapiens GN=NUCKS1 PE=1 SV=1355

Match to Query 5873: 1227.709088 from(614.861820, 2+) intensity(208671.0000)

Title: File2115 Spectrum7255 scans: 8333

Data file I:\2013-12-03-SIMM7721-FR1-3-ZW.mgf

Click mouse within plot area to zoom in by factor of two about that point

Or,   to  Da

Label all possible matches  Label matches used for scoring

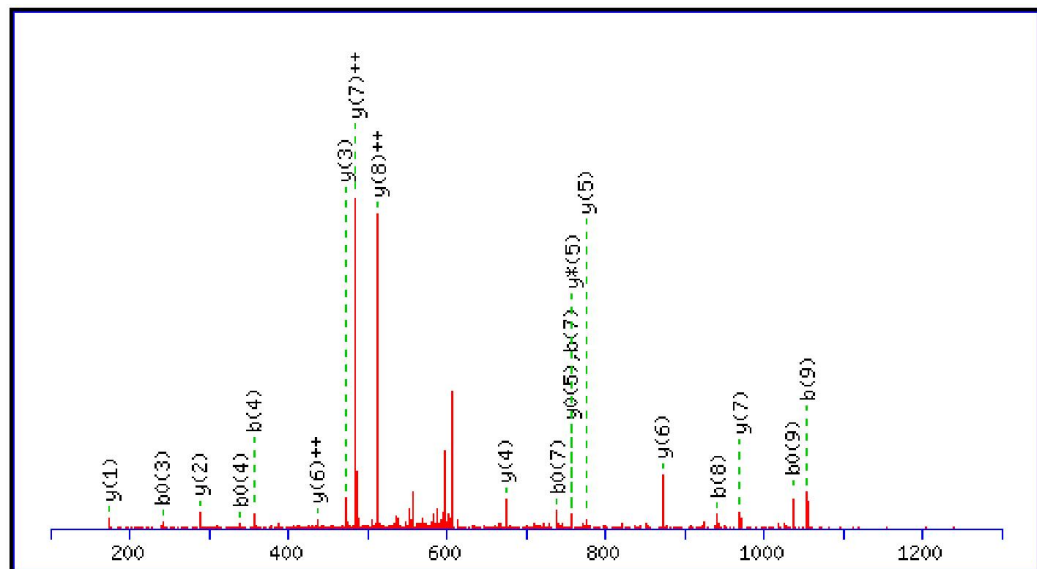

**Monoisotopic mass of neutral peptide Mr(calc): 1227.7096**

**Fixed modifications:** Carbamidomethyl (C) (apply to specified residues or termini only)

**Variable modifications:**

**K7** : Propionyl-(13CD3)Methyl (K)

**K8** : Propionyl (K)

**Ions Score: 51 Expect: 0.0032**

**Matches : 20/88 fragment ions using 31 most intense peaks**

| #  | b                | b <sup>++</sup> | b*        | b <sup>++</sup> * | b <sup>0</sup>   | b <sup>0++</sup> | Seq. | y               | y <sup>++</sup> | y*              | y <sup>++</sup> * | y <sup>0</sup>  | y <sup>0++</sup> | #  |
|----|------------------|-----------------|-----------|-------------------|------------------|------------------|------|-----------------|-----------------|-----------------|-------------------|-----------------|------------------|----|
| 1  | 116.0342         | 58.5207         |           |                   | 98.0237          | 49.5155          | D    |                 |                 |                 |                   |                 |                  | 10 |
| 2  | 203.0662         | 102.0368        |           |                   | 185.0557         | 93.0315          | S    | 1113.6899       | 557.3486        | 1096.6634       | 548.8353          | 1095.6793       | 548.3433         | 9  |
| 3  | 260.0877         | 130.0475        |           |                   | 242.0771         | 121.0422         | G    | 1026.6579       | 513.8326        | 1009.6313       | 505.3193          | 1008.6473       | 504.8273         | 8  |
| 4  | <b>357.1405</b>  | 179.0739        |           |                   | 339.1299         | 170.0686         | P    | <b>969.6364</b> | <b>485.3218</b> | 952.6099        | 476.8086          | 951.6258        | 476.3166         | 7  |
| 5  | 454.1932         | 227.6003        |           |                   | 436.1827         | 218.0950         | P    | <b>872.5836</b> | <b>436.7955</b> | 855.5571        | 428.2822          | 854.5731        | 427.7902         | 6  |
| 6  | 555.2409         | 278.1241        |           |                   | 537.2304         | 269.1188         | T    | <b>775.5309</b> | 388.2691        | <b>758.5043</b> | 379.7558          | <b>757.5203</b> | 379.2638         | 5  |
| 7  | <b>757.3999</b>  | 379.2036        | 740.3734  | 370.6903          | <b>739.3894</b>  | 370.1983         | K    | <b>674.4832</b> | 337.7452        | 657.4567        | 329.2320          |                 |                  | 4  |
| 8  | <b>941.5211</b>  | 471.2642        | 924.4946  | 462.7509          | 923.5105         | 462.2589         | K    | <b>472.3242</b> | 236.6657        | 455.2976        | 228.1525          |                 |                  | 3  |
| 9  | <b>1054.6052</b> | 527.8062        | 1037.5786 | 519.2930          | <b>1036.5946</b> | 518.8009         | I    | <b>288.2030</b> | 144.6051        | 271.1765        | 136.0919          |                 |                  | 2  |
| 10 |                  |                 |           |                   |                  |                  | R    | <b>175.1190</b> | 88.0631         | 158.0924        | 79.5498           |                 |                  | 1  |

MS/MS Fragmentation of **VLKNQDLAR**

Found in **P11678**, Eosinophil peroxidase OS=Homo sapiens GN=EPX PE=1 SV=2

Match to Query 4521: 1129.683328 from(565.848940, 2+) intensity(101973.9688)

Title: File2115 Spectrum2719 scans: 3604

Data file I:\2013-12-03-SIMM7721-FR1-3-ZW.mgf

Click mouse within plot area to zoom in by factor of two about that point

Or,   to  Da

Label all possible matches  Label matches used for scoring

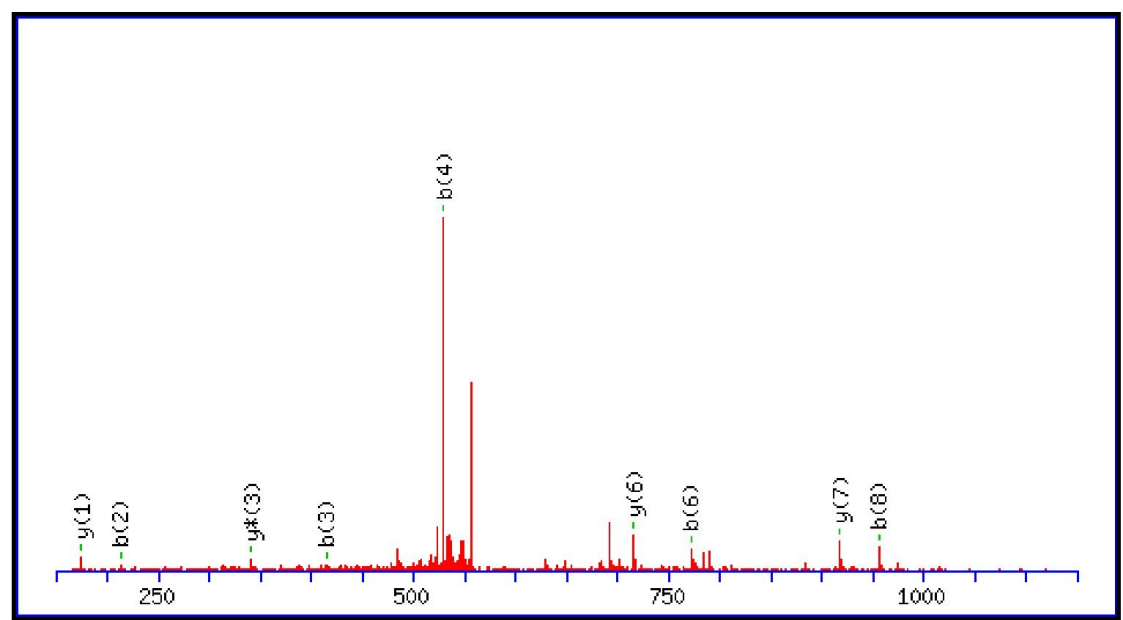

**Monoisotopic mass of neutral peptide Mr(calc):** 1129.6728

**Fixed modifications:** Carbamidomethyl (C) (apply to specified residues or termini only)

**Variable modifications:**

**K3** : Propionyl-(13CD3)Methyl (K)

**Ions Score:** 26 **Expect:** 0.69

**Matches :** 9/76 fragment ions using 20 most intense peaks

| # | b               | b <sup>++</sup> | b*       | b <sup>+++</sup> | b <sup>0</sup> | b <sup>0++</sup> | Seq. | y               | y <sup>++</sup> | y*              | y <sup>+++</sup> | y <sup>0</sup> | y <sup>0++</sup> | # |
|---|-----------------|-----------------|----------|------------------|----------------|------------------|------|-----------------|-----------------|-----------------|------------------|----------------|------------------|---|
| 1 | 100.0757        | 50.5415         |          |                  |                |                  | V    |                 |                 |                 |                  |                |                  | 9 |
| 2 | <b>213.1598</b> | 107.0835        |          |                  |                |                  | L    | 1031.6117       | 516.3095        | 1014.5851       | 507.7962         | 1013.6011      | 507.3042         | 8 |
| 3 | <b>415.3188</b> | 208.1630        | 398.2922 | 199.6497         |                |                  | K    | <b>918.5276</b> | 459.7674        | 901.5010        | 451.2542         | 900.5170       | 450.7622         | 7 |
| 4 | <b>529.3617</b> | 265.1845        | 512.3351 | 256.6712         |                |                  | N    | <b>716.3686</b> | 358.6879        | 699.3420        | 350.1747         | 698.3580       | 349.6826         | 6 |
| 5 | 657.4203        | 329.2138        | 640.3937 | 320.7005         |                |                  | Q    | 602.3257        | 301.6665        | 585.2991        | 293.1532         | 584.3151       | 292.6612         | 5 |
| 6 | <b>772.4472</b> | 386.7272        | 755.4207 | 378.2140         | 754.4366       | 377.7220         | D    | 474.2671        | 237.6372        | 457.2405        | 229.1239         | 456.2565       | 228.6319         | 4 |
| 7 | 885.5313        | 443.2693        | 868.5047 | 434.7560         | 867.5207       | 434.2640         | L    | 359.2401        | 180.1237        | <b>342.2136</b> | 171.6104         |                |                  | 3 |
| 8 | <b>956.5684</b> | 478.7878        | 939.5418 | 470.2746         | 938.5578       | 469.7826         | A    | 246.1561        | 123.5817        | 229.1295        | 115.0684         |                |                  | 2 |
| 9 |                 |                 |          |                  |                |                  | R    | <b>175.1190</b> | 88.0631         | 158.0924        | 79.5498          |                |                  | 1 |

# MS/MS Fragmentation of VKQGKDQNKAR

Found in **B4DYJ6**, E3 ubiquitin-protein ligase TRIP12 OS=Homo sapiens GN=TRIP12 PE=2 SV=1

Match to Query 8827: 1456.827128 from(729.420840, 2+) intensity(31586.7031)

Title: File2115 Spectrum4011 scans: 4951

Data file I:\2013-12-03-SIMM7721-FR1-3-ZW.mgf

Click mouse within plot area to zoom in by factor of two about that point

Or,   to  Da

Label all possible matches  Label matches used for scoring

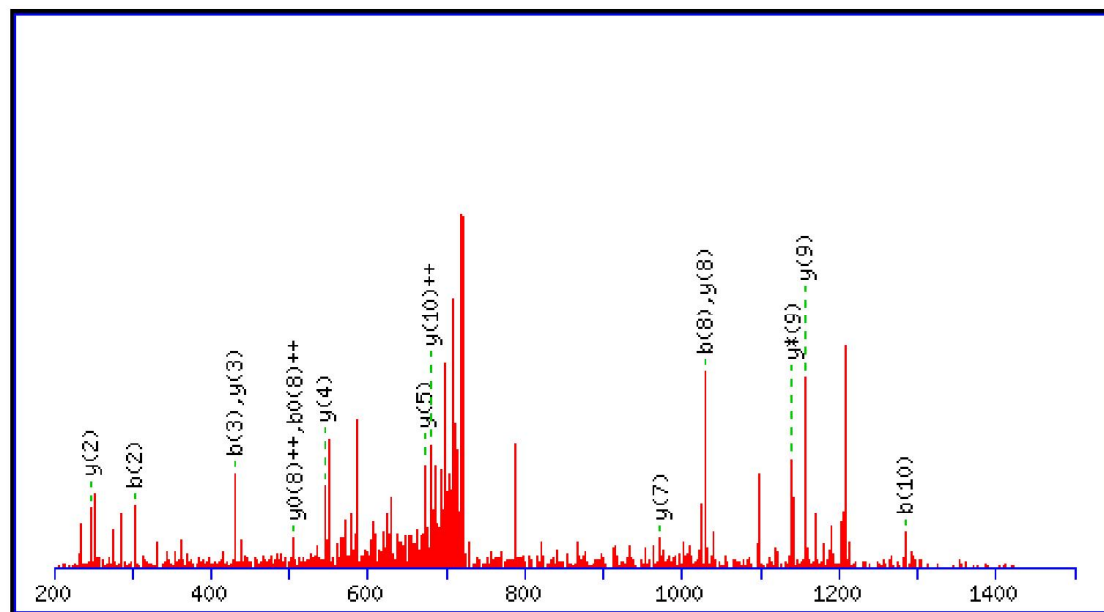

**Monoisotopic mass of neutral peptide Mr(calc): 1456.8270**

**Fixed modifications:** Carbamidomethyl (C) (apply to specified residues or termini only)

**Variable modifications:**

**K2** : Propionyl-(13CD3)Methyl (K)

**K5** : Propionyl (K)

**K9** : Propionyl (K)

**Ions Score: 23 Expect: 2.3**

**Matches : 15/98 fragment ions using 39 most intense peaks**

| #  | b                | b <sup>++</sup> | b <sup>+</sup> | b <sup>++</sup> | b <sup>0</sup> | b <sup>0++</sup> | Seq. | y                | y <sup>++</sup> | y <sup>+</sup>   | y <sup>++</sup> | y <sup>0</sup> | y <sup>0++</sup> | #  |
|----|------------------|-----------------|----------------|-----------------|----------------|------------------|------|------------------|-----------------|------------------|-----------------|----------------|------------------|----|
| 1  | 100.0757         | 50.5415         |                |                 |                |                  | V    |                  |                 |                  |                 |                |                  | 11 |
| 2  | <b>302.2347</b>  | 151.6210        | 285.2082       | 143.1077        |                |                  | K    | 1358.7659        | <b>679.8866</b> | 1341.7394        | 671.3733        | 1340.7554      | 670.8813         | 10 |
| 3  | <b>430.2933</b>  | 215.6503        | 413.2667       | 207.1370        |                |                  | Q    | <b>1156.6069</b> | 578.8071        | <b>1139.5804</b> | 570.2938        | 1138.5963      | 569.8018         | 9  |
| 4  | 487.3147         | 244.1610        | 470.2882       | 235.6477        |                |                  | G    | <b>1028.5483</b> | 514.7778        | 1011.5218        | 506.2645        | 1010.5378      | <b>505.7725</b>  | 8  |
| 5  | 671.4359         | 336.2216        | 654.4094       | 327.4083        |                |                  | K    | <b>971.5269</b>  | 486.2671        | 954.5003         | 477.7538        | 953.5163       | 477.2618         | 7  |
| 6  | 786.4629         | 393.7351        | 769.4363       | 385.2218        | 768.4523       | 384.7298         | D    | 787.4057         | 394.2065        | 770.3791         | 385.6932        | 769.3951       | 385.2012         | 6  |
| 7  | 914.5214         | 457.7644        | 897.4949       | 449.2511        | 896.5109       | 448.7591         | Q    | <b>672.3787</b>  | 336.6930        | 655.3522         | 328.1797        |                |                  | 5  |
| 8  | <b>1028.5644</b> | 514.7858        | 1011.5378      | 506.2725        | 1010.5538      | <b>505.7805</b>  | N    | <b>544.3202</b>  | 272.6637        | 527.2936         | 264.1504        |                |                  | 4  |
| 9  | 1212.6855        | 606.8464        | 1195.6590      | 598.3331        | 1194.6750      | 597.8411         | K    | <b>430.2772</b>  | 215.6423        | 413.2507         | 207.1290        |                |                  | 3  |
| 10 | <b>1283.7227</b> | 642.3650        | 1266.6961      | 633.8517        | 1265.7121      | 633.3597         | A    | <b>246.1561</b>  | 123.5817        | 229.1295         | 115.0684        |                |                  | 2  |
| 11 |                  |                 |                |                 |                |                  | R    | 175.1190         | 88.0631         | 158.0924         | 79.5498         |                |                  | 1  |

Match to Query 6716: 1230.681988 from(616.348270,2+) intensity(1657435.8750)

Title: File2112 Spectrum5968 scans: 7006

Data file I:\2013-12-03-SIMM7721-FR1-2-ZW.mgf

Click mouse within plot area to zoom in by factor of two about that point

Or,  150  1150  Label all possible matches  Label matches used for scoring 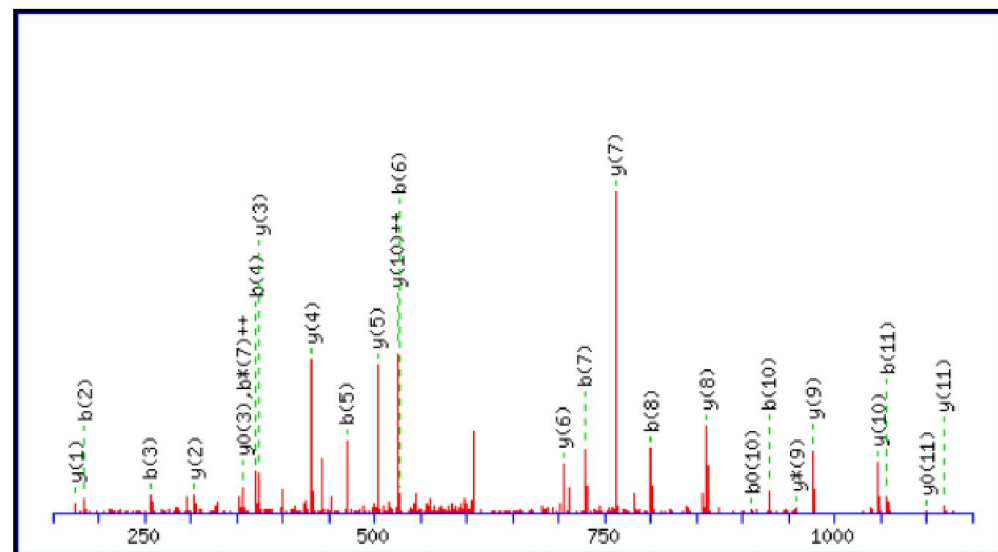

Monoisotopic mass of neutral peptide Mr(calc): 1230.6841

Fixed modifications: Carbamidomethyl (C) (apply to specified r

Variable modifications:

K7 : Propionyl-(13CD3)Methyl (K)

Ions Score: 93 Expect: 2.1e-007

Matches : 26/112 fragment ions using 40 most intense peaks (

| #  | b                | b <sup>++</sup> | b <sup>*</sup> | b <sup>*++</sup> | b <sup>0</sup>  | b <sup>0++</sup> | Seq. | y                | y <sup>++</sup> | y <sup>*</sup>  | y <sup>*++</sup> | y <sup>0</sup>   | y <sup>0++</sup> | #  |
|----|------------------|-----------------|----------------|------------------|-----------------|------------------|------|------------------|-----------------|-----------------|------------------|------------------|------------------|----|
| 1  | 114.0913         | 57.5493         |                |                  |                 |                  | L    |                  |                 |                 |                  |                  |                  | 12 |
| 2  | <b>185.1285</b>  | 93.0679         |                |                  |                 |                  | A    | <b>1118.6073</b> | 559.8073        | 1101.5808       | 551.2940         | <b>1100.5967</b> | 550.8020         | 11 |
| 3  | <b>256.1656</b>  | 128.5864        |                |                  |                 |                  | A    | <b>1047.5702</b> | <b>524.2887</b> | 1030.5436       | 515.7755         | 1029.5596        | 515.2834         | 10 |
| 4  | <b>371.1925</b>  | 186.0999        |                |                  | 353.1819        | 177.0946         | D    | <b>976.5331</b>  | 488.7702        | <b>959.5065</b> | 480.2569         | 958.5225         | 479.7649         | 9  |
| 5  | <b>470.2609</b>  | 235.6341        |                |                  | 452.2504        | 226.6288         | V    | <b>861.5061</b>  | 431.2567        | 844.4796        | 422.7434         | 843.4956         | 422.2514         | 8  |
| 6  | <b>527.2824</b>  | 264.1448        |                |                  | 509.2718        | 255.1396         | G    | <b>762.4377</b>  | 381.7225        | 745.4112        | 373.2092         | 744.4271         | 372.7172         | 7  |
| 7  | <b>729.4414</b>  | 365.2243        | 712.4149       | <b>356.7111</b>  | 711.4308        | 356.2191         | K    | <b>705.4163</b>  | 353.2118        | 688.3897        | 344.6985         | 687.4057         | 344.2065         | 6  |
| 8  | <b>800.4785</b>  | 400.7429        | 783.4520       | 392.2296         | 782.4680        | 391.7376         | A    | <b>503.2572</b>  | 252.1323        | 486.2307        | 243.6190         | 485.2467         | 243.1270         | 5  |
| 9  | 857.5000         | 429.2536        | 840.4734       | 420.7404         | 839.4894        | 420.2483         | G    | <b>432.2201</b>  | 216.6137        | 415.1936        | 208.1004         | 414.2096         | 207.6084         | 4  |
| 10 | <b>928.5371</b>  | 464.7722        | 911.5105       | 456.1589         | <b>910.5265</b> | 455.7669         | A    | <b>375.1987</b>  | 188.1030        | 358.1721        | 179.5897         | <b>357.1881</b>  | 179.0977         | 3  |
| 11 | <b>1057.5797</b> | 529.2935        | 1040.5531      | 520.7802         | 1039.5691       | 520.2882         | E    | <b>304.1615</b>  | 152.5844        | 287.1350        | 144.0711         | 286.1510         | 143.5791         | 2  |
| 12 |                  |                 |                |                  |                 |                  | R    | <b>175.1190</b>  | 88.0631         | 158.0924        | 79.5498          |                  |                  | 1  |

Match to Query 7342: 1276.688948 from(639.351750,2+) intensity(41894.8672)

Title: File2112 Spectrum5407 scans: 6420

Data file I:\2013-12-03-SIMM7721-FR1-2-ZW.mgf

Click mouse within plot area to zoom in by factor of two about that point

Or,   to  Da Label all possible matches  Label matches used for scoring 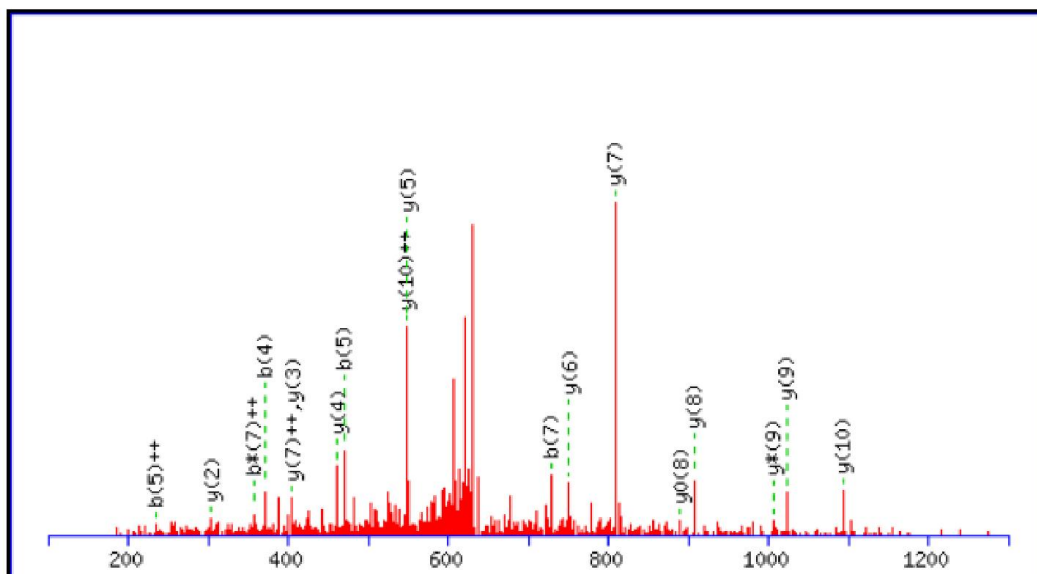

Monoisotopic mass of neutral peptide Mr(calc): 1276.6896

Fixed modifications: Carbamidomethyl (C) (apply to specified)

Variable modifications:

K7 : Propionyl-(13CD3)Methyl (K)

Ions Score: 61 Expect: 0.00033

Matches : 18/112 fragment ions using 33 most intense peaks

| #  | b         | b <sup>++</sup> | b <sup>*</sup> | b <sup>*++</sup> | b <sup>0</sup> | b <sup>0++</sup> | Seq. | y         | y <sup>++</sup> | y <sup>*</sup> | y <sup>*++</sup> | y <sup>0</sup> | y <sup>0++</sup> | #  |
|----|-----------|-----------------|----------------|------------------|----------------|------------------|------|-----------|-----------------|----------------|------------------|----------------|------------------|----|
| 1  | 114.0913  | 57.5493         |                |                  |                |                  | L    |           |                 |                |                  |                |                  | 12 |
| 2  | 185.1285  | 93.0679         |                |                  |                |                  | A    | 1164.6128 | 582.8100        | 1147.5862      | 574.2968         | 1146.6022      | 573.8047         | 11 |
| 3  | 256.1656  | 128.5864        |                |                  |                |                  | A    | 1093.5757 | 547.2915        | 1076.5491      | 538.7782         | 1075.5651      | 538.2862         | 10 |
| 4  | 371.1925  | 186.0999        |                |                  | 353.1819       | 177.0946         | D    | 1022.5386 | 511.7729        | 1005.5120      | 503.2596         | 1004.5280      | 502.7676         | 9  |
| 5  | 470.2609  | 235.6341        |                |                  | 452.2504       | 226.6280         | V    | 907.5116  | 454.2594        | 890.4851       | 445.7462         | 889.5010       | 445.2542         | 8  |
| 6  | 527.2824  | 264.1448        |                |                  | 509.2718       | 255.1396         | G    | 808.4432  | 404.7252        | 791.4166       | 396.2120         | 790.4326       | 395.7200         | 7  |
| 7  | 729.4414  | 365.2243        | 712.4149       | 356.7111         | 711.4308       | 356.2191         | K    | 751.4217  | 376.2145        | 734.3952       | 367.7012         | 733.4112       | 367.2092         | 6  |
| 8  | 816.4734  | 408.7404        | 799.4469       | 400.2271         | 798.4629       | 399.7351         | S    | 549.2627  | 275.1350        | 532.2362       | 266.6217         | 531.2522       | 266.1297         | 5  |
| 9  | 873.4949  | 437.2511        | 856.4683       | 428.7378         | 855.4843       | 428.2458         | G    | 462.2307  | 231.6190        | 445.2041       | 223.1057         | 444.2201       | 222.6137         | 4  |
| 10 | 974.5426  | 487.7749        | 957.5160       | 479.2617         | 956.5320       | 478.7696         | T    | 405.2092  | 203.1082        | 388.1827       | 194.5950         | 387.1987       | 194.1030         | 3  |
| 11 | 1103.5852 | 552.2962        | 1086.5586      | 543.7829         | 1085.5746      | 543.2909         | E    | 304.1615  | 152.5844        | 287.1350       | 144.0711         | 286.1510       | 143.5791         | 2  |
| 12 |           |                 |                |                  |                |                  | R    | 175.1190  | 88.0631         | 158.0924       | 79.5498          |                |                  | 1  |

Found in **H0YLC9**, TERF1-interacting nuclear factor 2 (Fragment) OS=Homo sapiens GN=TINF2 PE=2 SV=1

Match to Query 1020: 833.487028 from(417.750790,2+) intensity(730602.7500)

Title: File2112 Spectrum3917 scans: 4863

Data file I:\2013-12-03-SIMM7721-FR1-2-ZW.mgf

Click mouse within plot area to zoom in by factor of two about that point

Or,   to  Da Label all possible matches  Label matches used for scoring 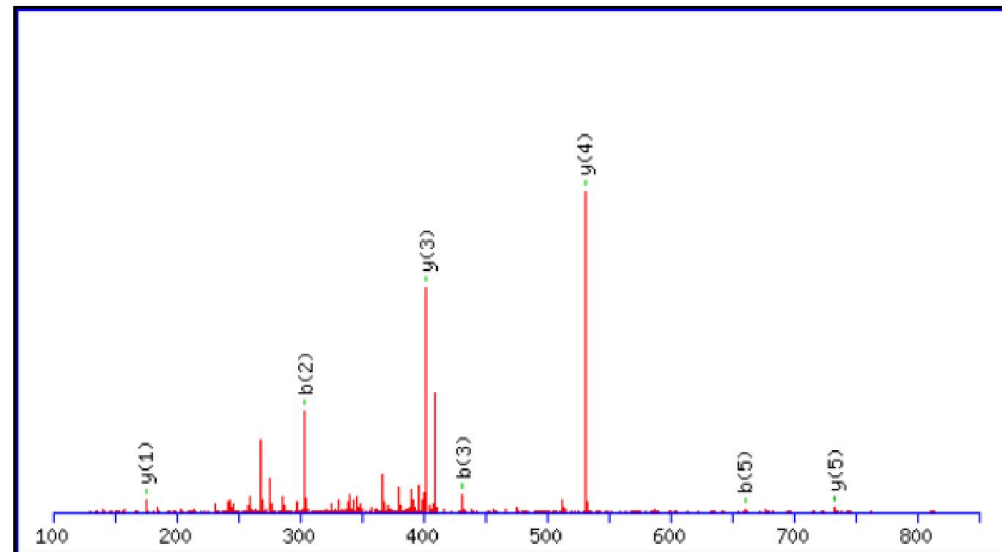

Monoisotopic mass of neutral peptide Mr(calc): 833.4879

Fixed modifications: Carbamidomethyl (C) (apply to specified residues or termini only)

Variable modifications:

K2 : Propionyl-(13CD3)Methyl (K)

Ions Score: 40 Expect: 0.028

Matches : 7/54 fragment ions using 7 most intense peaks

(he)

| # | b        | b <sup>++</sup> | b <sup>*</sup> | b <sup>*++</sup> | b <sup>0</sup> | b <sup>0++</sup> | Seq. | y        | y <sup>++</sup> | y <sup>*</sup> | y <sup>*++</sup> | y <sup>0</sup> | y <sup>0++</sup> | # |
|---|----------|-----------------|----------------|------------------|----------------|------------------|------|----------|-----------------|----------------|------------------|----------------|------------------|---|
| 1 | 102.0550 | 51.5311         |                |                  | 84.0444        | 42.5258          | T    |          |                 |                |                  |                |                  | 6 |
| 2 | 304.2140 | 152.6106        | 287.1874       | 144.0973         | 286.2034       | 143.6053         | K    | 733.4476 | 367.2274        | 716.4210       | 358.7141         | 715.4370       | 358.2221         | 5 |
| 3 | 432.2725 | 216.6399        | 415.2460       | 208.1266         | 414.2620       | 207.6346         | Q    | 531.2885 | 266.1479        | 514.2620       | 257.6346         | 513.2780       | 257.1426         | 4 |
| 4 | 547.2995 | 274.1534        | 530.2729       | 265.6401         | 529.2889       | 265.1481         | D    | 403.2300 | 202.1186        | 386.2034       | 193.6053         | 385.2194       | 193.1133         | 3 |
| 5 | 660.3836 | 330.6954        | 643.3570       | 322.1821         | 642.3730       | 321.6901         | L    | 288.2030 | 144.6051        | 271.1765       | 136.0919         |                |                  | 2 |
| 6 |          |                 |                |                  |                |                  | R    | 175.1190 | 88.0631         | 158.0924       | 79.5498          |                |                  | 1 |



Match to Query 10098: 1482.909528 from(742.462040,2+) intensity(300035.4063)

Title: File2112 Spectrum4086 scans: 5039

Data file I:\2013-12-03-SIMM7721-FR1-2-ZW.mgf

Click mouse within plot area to zoom in by factor of two about that point

Or,   to  Da Label all possible matches  Label matches used for scoring 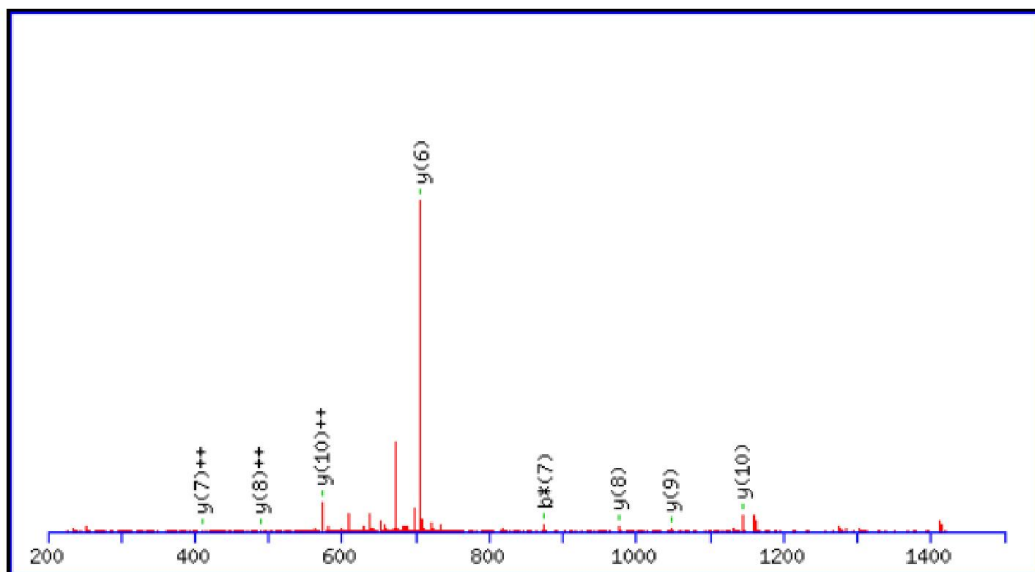

Monoisotopic mass of neutral peptide Mr(calc): 1482.9154

Fixed modifications: Carbamidomethyl (C) (apply to specified)

Variable modifications:

K2 : Propionyl (K)

K12 : Propionyl-(13CD3)Methyl (K)

Ions Score: 25 Expect: 0.52

Matches : 8/114 fragment ions using 12 most intense peaks

| #  | b         | b <sup>++</sup> | b <sup>*</sup>  | b <sup>*++</sup> | b <sup>0</sup> | b <sup>0++</sup> | Seq. | y                | y <sup>++</sup> | y <sup>*</sup> | y <sup>*++</sup> | y <sup>0</sup> | y <sup>0++</sup> | #  |
|----|-----------|-----------------|-----------------|------------------|----------------|------------------|------|------------------|-----------------|----------------|------------------|----------------|------------------|----|
| 1  | 157.1084  | 79.0578         | 140.0818        | 70.5446          |                |                  | R    |                  |                 |                |                  |                |                  | 12 |
| 2  | 341.2296  | 171.1184        | 324.2030        | 162.6051         |                |                  | K    | 1327.8216        | 664.4145        | 1310.7951      | 655.9012         | 1309.8111      | 655.4092         | 11 |
| 3  | 438.2823  | 219.6448        | 421.2558        | 211.1315         |                |                  | P    | <b>1143.7005</b> | <b>572.3539</b> | 1126.6739      | 563.8406         | 1125.6899      | 563.3486         | 10 |
| 4  | 509.3194  | 255.1634        | 492.2929        | 246.6501         |                |                  | A    | <b>1046.6477</b> | 523.8275        | 1029.6212      | 515.3142         | 1028.6371      | 514.8222         | 9  |
| 5  | 665.4206  | 333.2139        | 648.3940        | 324.7006         |                |                  | R    | <b>975.6106</b>  | <b>488.3089</b> | 958.5840       | 479.7957         | 957.6000       | 479.3037         | 8  |
| 6  | 778.5046  | 389.7559        | 761.4781        | 381.2427         |                |                  | L    | 819.5095         | <b>410.2584</b> | 802.4829       | 401.7451         | 801.4989       | 401.2531         | 7  |
| 7  | 891.5887  | 446.2980        | <b>874.5621</b> | 437.7847         |                |                  | L    | <b>706.4254</b>  | 353.7163        | 689.3989       | 345.2031         | 688.4149       | 344.7111         | 6  |
| 8  | 1020.6313 | 510.8193        | 1003.6047       | 502.3060         | 1002.6207      | 501.8140         | E    | 593.3414         | 297.1743        | 576.3148       | 288.6610         | 575.3308       | 288.1690         | 5  |
| 9  | 1091.6684 | 546.3378        | 1074.6418       | 537.8246         | 1073.6578      | 537.3326         | A    | 464.2988         | 232.6530        | 447.2722       | 224.1397         | 446.2882       | 223.6477         | 4  |
| 10 | 1192.7161 | 596.8617        | 1175.6895       | 588.3484         | 1174.7055      | 587.8564         | T    | 393.2616         | 197.1345        | 376.2351       | 188.6212         | 375.2511       | 188.1292         | 3  |
| 11 | 1263.7532 | 632.3802        | 1246.7266       | 623.8670         | 1245.7426      | 623.3749         | A    | 292.2140         | 146.6106        | 275.1874       | 138.0973         |                |                  | 2  |
| 12 |           |                 |                 |                  |                |                  | K    | 221.1769         | 111.0921        | 204.1503       | 102.5788         |                |                  | 1  |

Match to Query 12255: 1688.955548 from(845.485050,2+) intensity(49416.4219)

Title: File2112 Spectrum7809 scans: 8925

Data file I:\2013-12-03-SIMM7721-FR1-2-ZW.mgf

Click mouse within plot area to zoom in by factor of two about that point

Or,   to  Da Label all possible matches  Label matches used for scoring 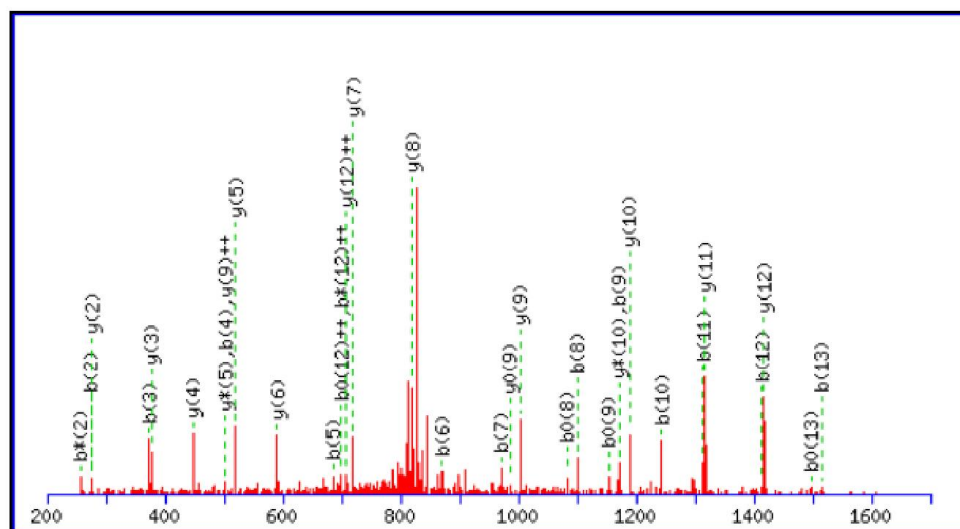Monoisotopic mass of neutral peptide  $M_r(\text{calc})$ : 1688.9581

Fixed modifications: Carbamidomethyl (C) (apply to specified residues or termini only)

Variable modifications:

K2 : Propionyl-(13CD3)Methyl (K)

K5 : Propionyl (K)

K6 : Propionyl (K)

Ions Score: 76 Expect: 1.1e-005

Matches : 34/146 fragment ions using 56 most intense peaks [\(help\)](#)

| #  | b                | b <sup>++</sup> | b*              | b <sup>+++</sup> | b <sup>0</sup>   | b <sup>0++</sup> | Seq. | y                | y <sup>++</sup> | y*               | y <sup>+++</sup> | y <sup>0</sup>  | y <sup>0++</sup> | #  |
|----|------------------|-----------------|-----------------|------------------|------------------|------------------|------|------------------|-----------------|------------------|------------------|-----------------|------------------|----|
| 1  | 72.0444          | 36.5258         |                 |                  |                  |                  | A    |                  |                 |                  |                  |                 |                  | 14 |
| 2  | <b>274.2034</b>  | 137.6053        | <b>257.1769</b> | 129.0921         |                  |                  | K    | 1618.9283        | 809.9678        | 1601.9018        | 801.4545         | 1600.9177       | 800.9625         | 13 |
| 3  | <b>373.2718</b>  | 187.1395        | 356.2453        | 178.6263         |                  |                  | V    | <b>1416.7693</b> | <b>708.8883</b> | 1399.7427        | 700.3750         | 1398.7587       | 699.8830         | 12 |
| 4  | <b>502.3144</b>  | 251.6608        | 485.2879        | 243.1476         | 484.3038         | 242.6556         | E    | <b>1317.7009</b> | 659.3541        | 1300.6743        | 650.8408         | 1299.6903       | 650.3488         | 11 |
| 5  | <b>686.4356</b>  | 343.7214        | 669.4090        | 335.2082         | 668.4250         | 334.7161         | K    | <b>1188.6583</b> | 594.8328        | <b>1171.6317</b> | 586.3195         | 1170.6477       | 585.8275         | 10 |
| 6  | <b>870.5568</b>  | 435.7820        | 853.5302        | 427.2687         | 852.5462         | 426.7767         | K    | <b>1004.5371</b> | <b>502.7722</b> | 987.5106         | 494.2589         | <b>986.5265</b> | 493.7669         | 9  |
| 7  | <b>971.6044</b>  | 486.3059        | 954.5779        | 477.7926         | 953.5939         | 477.3006         | T    | <b>820.4159</b>  | 410.7116        | 803.3894         | 402.1983         | 802.4054        | 401.7063         | 8  |
| 8  | <b>1100.6470</b> | 550.8272        | 1083.6205       | 542.3139         | <b>1082.6365</b> | 541.8219         | E    | <b>719.3682</b>  | 360.1878        | 702.3417         | 351.6745         | 701.3577        | 351.1825         | 7  |
| 9  | <b>1171.6842</b> | 586.3457        | 1154.6576       | 577.8324         | <b>1153.6736</b> | 577.3404         | A    | <b>590.3257</b>  | 295.6665        | 573.2991         | 287.1532         | 572.3151        | 286.6612         | 6  |
| 10 | <b>1242.7213</b> | 621.8643        | 1225.6947       | 613.3510         | 1224.7107        | 612.8590         | A    | <b>519.2885</b>  | 260.1479        | <b>502.2620</b>  | 251.6346         | 501.2780        | 251.1426         | 5  |
| 11 | <b>1313.7584</b> | 657.3828        | 1296.7318       | 648.8696         | 1295.7478        | 648.3775         | A    | <b>448.2514</b>  | 224.6293        | 431.2249         | 216.1161         | 430.2409        | 215.6241         | 4  |
| 12 | <b>1414.8061</b> | 707.9067        | 1397.7795       | <b>699.3934</b>  | 1396.7955        | <b>698.9014</b>  | T    | <b>377.2143</b>  | 189.1108        | 360.1878         | 180.5975         | 359.2037        | 180.1055         | 3  |
| 13 | <b>1515.8537</b> | 758.4305        | 1498.8272       | 749.9172         | <b>1497.8432</b> | 749.4252         | T    | <b>276.1666</b>  | 138.5870        | 259.1401         | 130.0737         | 258.1561        | 129.5817         | 2  |
| 14 |                  |                 |                 |                  |                  |                  | R    | 175.1190         | 88.0631         | 158.0924         | 79.5498          |                 |                  | 1  |

Match to Query 13482: 1829.997222 from(611.006350, 3+) intensity(2895879.0000)

Title: File2104 Spectrum6401 scans: 7647

Data file I:\2013-12-03-SIMM7721-FR1-1-ZW.mgf

Click mouse within plot area to zoom in by factor of two about that point

Or,   to  Da Label all possible matches  Label matches used for scoring 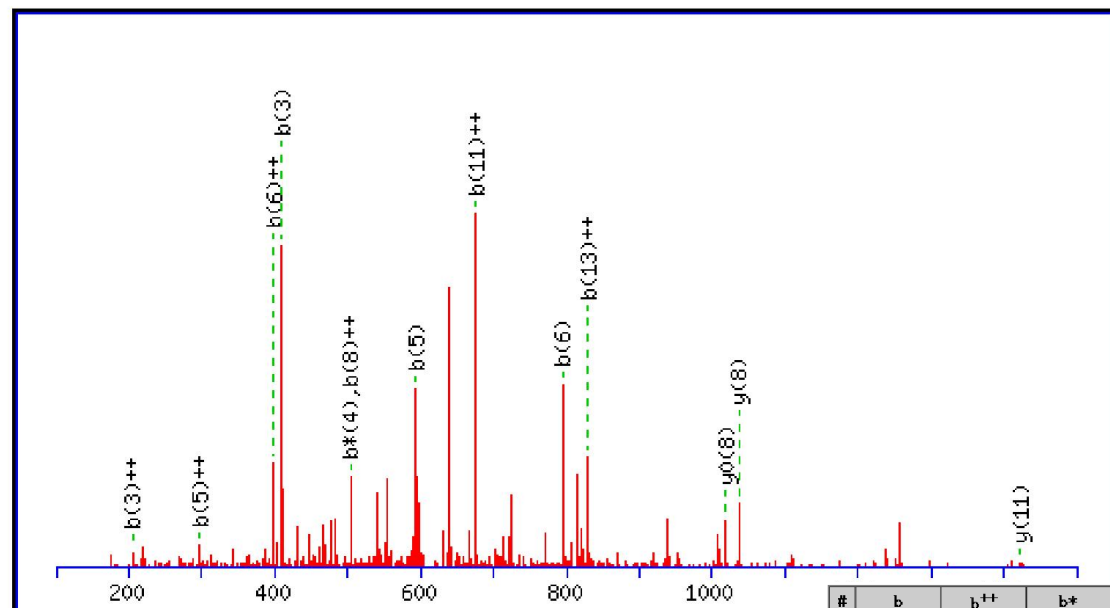**Monoisotopic mass of neutral peptide Mr(calc): 1830.****Fixed modifications:** Carbamidomethyl (C) (apply to spec)**Variable modifications:****K6** : Propionyl-(13CD3)Methyl (K)**M12** : Label:13C(1)2H(3)+Oxidation (M)**Ions Score: 24 Expect: 2.5****Matches : 13/134 fragment ions using 26 most intense peak**

| #  | b               | b <sup>++</sup> | b*              | b <sup>++</sup> | b <sup>0</sup> | b <sup>0++</sup> | Seq. | y                | y <sup>++</sup> | y*        | y <sup>++</sup> | y <sup>0</sup>   | y <sup>0++</sup> | #  |
|----|-----------------|-----------------|-----------------|-----------------|----------------|------------------|------|------------------|-----------------|-----------|-----------------|------------------|------------------|----|
| 1  | 148.0757        | 74.5415         |                 |                 |                |                  | F    |                  |                 |           |                 |                  |                  | 14 |
| 2  | 295.1441        | 148.0757        |                 |                 |                |                  | F    | 1683.9504        | 842.4789        | 1666.9239 | 833.9656        | 1665.9399        | 833.4736         | 13 |
| 3  | <b>409.1870</b> | <b>205.0972</b> | 392.1605        | 196.5839        |                |                  | N    | 1536.8820        | 768.9447        | 1519.8555 | 760.4314        | 1518.8715        | 759.9394         | 12 |
| 4  | 522.2711        | 261.6392        | <b>505.2445</b> | 253.1259        |                |                  | I    | <b>1422.8391</b> | 711.9232        | 1405.8126 | 703.4099        | 1404.8285        | 702.9179         | 11 |
| 5  | <b>593.3082</b> | <b>297.1577</b> | 576.2817        | 288.6445        |                |                  | A    | 1309.7550        | 655.3812        | 1292.7285 | 646.8679        | 1291.7445        | 646.3759         | 10 |
| 6  | <b>795.4672</b> | <b>398.2372</b> | 778.4407        | 389.7240        |                |                  | K    | 1238.7179        | 619.8626        | 1221.6914 | 611.3493        | 1220.7074        | 610.8573         | 9  |
| 7  | 910.4942        | 455.7507        | 893.4676        | 447.2374        | 892.4836       | 446.7454         | D    | <b>1036.5589</b> | 518.7831        | 1019.5324 | 510.2698        | <b>1018.5483</b> | 509.7778         | 8  |
| 8  | 1007.5469       | <b>504.2771</b> | 990.5204        | 495.7638        | 989.5364       | 495.2718         | P    | 921.5320         | 461.2696        | 904.5054  | 452.7563        | 903.5214         | 452.2643         | 7  |
| 9  | 1163.6480       | 582.3277        | 1146.6215       | 573.8144        | 1145.6375      | 573.3224         | R    | 824.4792         | 412.7432        | 807.4527  | 404.2300        | 806.4686         | 403.7380         | 6  |
| 10 | 1262.7165       | 631.8619        | 1245.6899       | 623.3486        | 1244.7059      | 622.8566         | V    | 668.3781         | 334.6927        | 651.3515  | 326.1794        | 650.3675         | 325.6874         | 5  |
| 11 | 1349.7485       | <b>675.3779</b> | 1332.7219       | 666.8646        | 1331.7379      | 666.3726         | S    | 569.3097         | 285.1585        | 552.2831  | 276.6452        | 551.2991         | 276.1532         | 4  |
| 12 | 1500.8061       | 750.9067        | 1483.7795       | 742.3934        | 1482.7955      | 741.9014         | I    | 482.2776         | 241.6425        | 465.2511  | 233.1292        |                  |                  | 3  |
| 13 | 1656.9072       | <b>828.9572</b> | 1639.8806       | 820.4440        | 1638.8966      | 819.9519         | R    | 331.2201         | 166.1137        | 314.1935  | 157.6004        |                  |                  | 2  |
| 14 |                 |                 |                 |                 |                |                  | R    | 175.1190         | 88.0631         | 158.0924  | 79.5498         |                  |                  | 1  |

Match to Query 16837: 2325.226092 from(776.082640, 3+) intensity(31604.5781)

Title: File2104 Spectrum16391 scans: 18054

Data file I:\2013-12-03-SIMM7721-FR1-1-ZW.mgf

Click mouse within plot area to zoom in by factor of two about that point

Or,   to  Da Label all possible matches  Label matches used for scoring 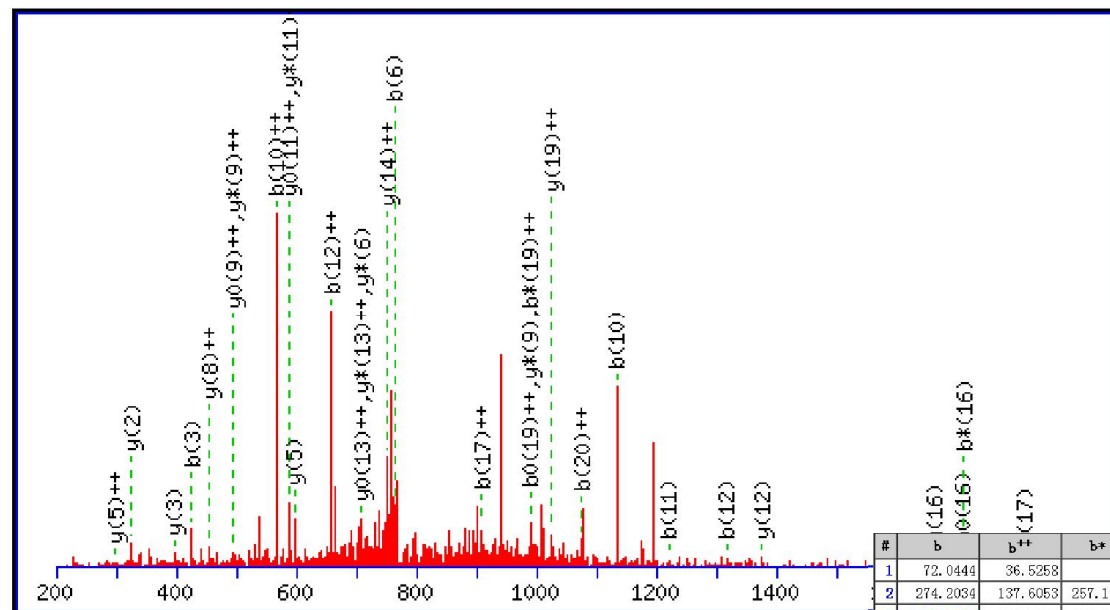Monoisotopic mass of neutral peptide  $M_r(\text{calc})$ : 2324.211

Fixed modifications: Carbamidomethyl (C) (apply to specific)

Variable modifications:

**K2** : Propionyl-(13C3)Methyl (K)  
**M3** : Label:13C(1)2H(3)+Oxidation (M)  
**M5** : Label:13C(1)2H(3)+Oxidation (M)  
**K10** : Propionyl (K)  
**M20** : Label:13C(1)2H(3)+Oxidation (M)

Ions Score: 21 Expect: 6.3

Matches : 31/224 fragment ions using 76 most intense peaks

| #  | b                | b <sup>++</sup>  | b*               | b <sup>+++</sup> | b <sup>0</sup>   | b <sup>0++</sup> | Seq. | y                | y <sup>++</sup>  | y*              | y <sup>+++</sup> | y <sup>0</sup> | y <sup>0++</sup> | #  |
|----|------------------|------------------|------------------|------------------|------------------|------------------|------|------------------|------------------|-----------------|------------------|----------------|------------------|----|
| 1  | 72.0444          | 36.5258          |                  |                  |                  |                  | A    |                  |                  |                 |                  |                |                  | 21 |
| 2  | 274.2034         | 137.6053         | 257.1769         | 129.0921         |                  |                  | K    | 2254.1814        | 1127.5944        | 2237.1549       | 1119.0811        | 2236.1709      | 1118.5891        | 20 |
| 3  | <b>425.2610</b>  | 213.1341         | 408.2344         | 204.6209         |                  |                  | N    | 2052.0224        | <b>1026.5148</b> | 2034.9959       | 1018.0016        | 2034.0119      | 1017.5096        | 19 |
| 4  | 512.2930         | 256.6501         | 495.2665         | 248.1369         | 494.2825         | 247.6449         | S    | 1900.9648        | 950.9861         | 1883.9383       | 942.4728         | 1882.9543      | 941.9808         | 18 |
| 5  | 663.3506         | 332.1789         | 646.3241         | 323.6657         | 645.3400         | 323.1737         | N    | <b>1813.9328</b> | 907.4700         | 1796.9063       | 898.9568         | 1795.9222      | 898.4648         | 17 |
| 6  | <b>764.3983</b>  | 382.7028         | 747.3717         | 374.1895         | 746.3877         | 373.6975         | T    | <b>1662.8752</b> | 831.9412         | 1645.8487       | 823.4280         | 1644.8647      | 822.9360         | 16 |
| 7  | 821.4197         | 411.2135         | 804.3932         | 402.7002         | 803.4092         | 402.2082         | G    | 1561.8275        | 781.4174         | 1544.8010       | 772.9041         | 1543.8170      | 772.4121         | 15 |
| 8  | 892.4569         | 446.7321         | 875.4303         | 438.2188         | 874.4463         | 437.7268         | A    | 1504.8061        | <b>752.9067</b>  | 1487.7795       | 744.3934         | 1486.7955      | 743.9014         | 14 |
| 9  | 949.4783         | 475.2428         | 932.4518         | 466.7295         | 931.4678         | 466.2375         | G    | 1433.7690        | 717.3881         | 1416.7424       | <b>708.8748</b>  | 1415.7584      | <b>708.3828</b>  | 13 |
| 10 | <b>1133.5995</b> | <b>567.3034</b>  | 1116.5730        | 558.7901         | 1115.5889        | 558.2981         | K    | <b>1376.7475</b> | 688.8774         | 1359.7209       | 680.3641         | 1358.7369      | 679.8721         | 12 |
| 11 | <b>1220.6315</b> | 610.8194         | 1203.6050        | 602.3061         | 1202.6210        | 601.8141         | S    | 1192.6263        | 596.8168         | 1175.5998       | <b>588.3035</b>  | 1174.6158      | <b>587.8115</b>  | 11 |
| 12 | <b>1317.6843</b> | <b>659.3458</b>  | 1300.6577        | 650.8325         | 1299.6737        | 650.3405         | P    | 1105.5943        | 553.3008         | 1088.5677       | 544.7875         | 1087.5837      | 544.2955         | 10 |
| 13 | 1414.7371        | 707.3722         | 1397.7105        | 699.3589         | 1396.7265        | 698.8669         | P    | 1008.5415        | 504.7744         | <b>991.5150</b> | <b>496.2611</b>  | 990.5310       | <b>495.7691</b>  | 9  |
| 14 | 1501.7691        | 751.3882         | 1484.7425        | 742.8749         | 1483.7585        | 742.3829         | S    | 911.4888         | <b>456.2480</b>  | 894.4622        | 447.7347         | 893.4782       | 447.2427         | 8  |
| 15 | 1600.8375        | 800.9224         | 1583.8109        | 792.4091         | 1582.8269        | 791.9171         | V    | 824.4567         | 412.7320         | 807.4302        | 404.2187         | 806.4462       | 403.7267         | 7  |
| 16 | 1728.8961        | 864.9517         | <b>1711.8695</b> | 856.4384         | <b>1710.8855</b> | 855.9464         | Q    | 725.3883         | 363.1978         | <b>708.3618</b> | 354.6845         | 707.3778       | 354.1925         | 6  |
| 17 | 1815.9281        | <b>908.4677</b>  | 1798.9016        | 899.9544         | 1797.9175        | 899.4624         | S    | <b>597.3297</b>  | <b>299.1685</b>  | 580.3032        | 290.6552         | 579.3192       | 290.1632         | 5  |
| 18 | 1929.0122        | 965.0097         | 1911.9856        | 956.4964         | 1911.0018        | 956.0044         | L    | 510.2977         | 255.6525         | 493.2712        | 247.1392         |                |                  | 4  |
| 19 | 2000.0493        | 1000.5283        | 1983.0227        | <b>992.0150</b>  | 1982.0387        | <b>991.5230</b>  | A    | <b>397.2137</b>  | 199.1105         | 380.1871        | 190.5972         |                |                  | 3  |
| 20 | 2151.1069        | <b>1076.0571</b> | 2134.0803        | 1067.5438        | 2133.0963        | 1067.0518        | N    | <b>326.1765</b>  | 163.5919         | 309.1500        | 155.0786         |                |                  | 2  |
| 21 |                  |                  |                  |                  |                  |                  | R    | 175.1190         | 88.0631          | 168.0924        | 79.5498          |                |                  | 1  |

Match to Query 10119: 1414.804668 from(708.409610,2+) intensity(40852.3359)

Title: File2098 Spectrum5940 scans: 6907

Data file I:\2013-12-05-SIMM7721-FR3-ZW.mgf

Click mouse within plot area to zoom in by factor of two about that point

Or,  200  1400 Da Label all possible matches  Label matches used for scoring 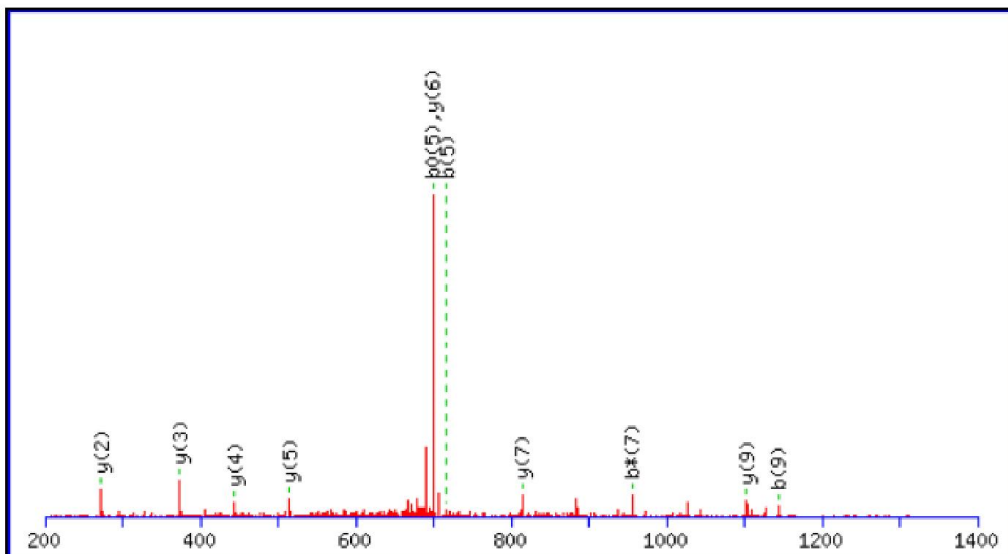

Monoisotopic mass of neutral peptide Mr(calc): 1414.8052

Fixed modifications: Carbamidomethyl (C) (apply to specified)

Variable modifications:

K2 : Propionyl (K)

K4 : Propionyl-(13CD3)Methyl (K)

K6 : Propionyl (K)

Ions Score: 62 Expect: 0.00029

Matches : 11/112 fragment ions using 12 most intense peaks

| #  | b                | b <sup>++</sup> | b*              | b <sup>***</sup> | b <sup>0</sup>  | b <sup>0++</sup> | Seq. | y                | y <sup>++</sup> | y*        | y <sup>***</sup> | y <sup>0</sup> | y <sup>0++</sup> | #  |
|----|------------------|-----------------|-----------------|------------------|-----------------|------------------|------|------------------|-----------------|-----------|------------------|----------------|------------------|----|
| 1  | 129.0659         | 65.0366         | 112.0393        | 56.5233          |                 |                  | Q    |                  |                 |           |                  |                |                  | 11 |
| 2  | 313.1870         | 157.0972        | 296.1605        | 148.5839         |                 |                  | K    | 1287.7540        | 644.3806        | 1270.7274 | 635.8673         | 1269.7434      | 635.3753         | 10 |
| 3  | 400.2191         | 200.6132        | 383.1925        | 192.0999         | 382.2085        | 191.6079         | S    | <b>1103.6328</b> | 552.3200        | 1086.6062 | 543.8068         | 1085.6222      | 543.3147         | 9  |
| 4  | 602.3781         | 301.6927        | 585.3515        | 293.1794         | 584.3675        | 292.6874         | K    | 1016.6008        | 508.8040        | 999.5742  | 500.2907         | 998.5902       | 499.7987         | 8  |
| 5  | <b>717.4050</b>  | 359.2061        | 700.3785        | 350.6929         | <b>699.3945</b> | 350.2009         | D    | <b>814.4417</b>  | 407.7245        | 797.4152  | 399.2112         | 796.4312       | 398.7192         | 7  |
| 6  | 901.5262         | 451.2667        | 884.4996        | 442.7535         | 883.5156        | 442.2615         | K    | <b>699.4148</b>  | 350.2110        | 682.3883  | 341.6978         | 681.4042       | 341.2058         | 6  |
| 7  | 972.5633         | 486.7853        | <b>955.5368</b> | 478.2720         | 954.5527        | 477.7800         | A    | <b>515.2936</b>  | 258.1504        | 498.2671  | 249.6372         | 497.2831       | 249.1452         | 5  |
| 8  | 1043.6004        | 522.3038        | 1026.5739       | 513.7906         | 1025.5899       | 513.2986         | A    | <b>444.2565</b>  | 222.6319        | 427.2300  | 214.1186         | 426.2459       | 213.6266         | 4  |
| 9  | <b>1144.6481</b> | 572.8277        | 1127.6216       | 564.3144         | 1126.6375       | 563.8224         | T    | <b>373.2194</b>  | 187.1133        | 356.1928  | 178.6001         | 355.2088       | 178.1081         | 3  |
| 10 | 1241.7009        | 621.3541        | 1224.6743       | 612.8408         | 1223.6903       | 612.3488         | P    | <b>272.1717</b>  | 136.5895        | 255.1452  | 128.0762         |                |                  | 2  |
| 11 |                  |                 |                 |                  |                 |                  | R    | 175.1190         | 88.0631         | 158.0924  | 79.5498          |                |                  | 1  |

Match to Query 3734: 1030.605328 from(516.309940,2+) intensity(1718561.0000)

Title: File2098 Spectrum1118 scans: 1738

Data file I:\2013-12-05-SIMM7721-FR3-ZW.mgf

Click mouse within plot area to zoom in by factor of two about that point

Or,  150  950  Label all possible matches  Label matches used for scoring 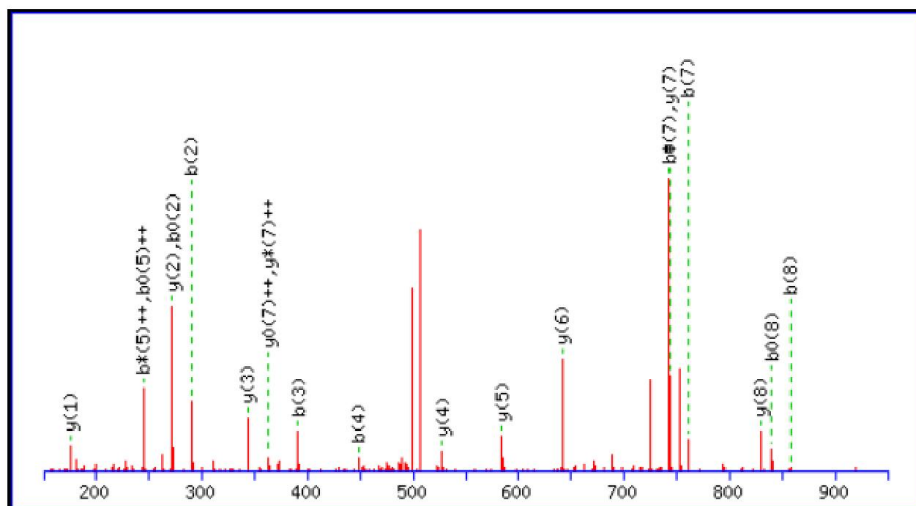Monoisotopic mass of neutral peptide  $M_r(\text{calc})$ : 1030.6044

Fixed modifications: Carbamidomethyl (C) (apply to specified residues or termini only)

Variable modifications:

K1 : Propionyl-(13CD3)Methyl (K)

K6 : Propionyl (K)

Ions Score: 78 Expect: 5.4e-006

Matches : 21/82 fragment ions using 24 most intense peaks ([help](#))

| # | b               | b <sup>++</sup> | b*              | b <sup>*++</sup> | b <sup>0</sup>  | b <sup>0++</sup> | Seq. | y               | y <sup>++</sup> | y*       | y <sup>*++</sup> | y <sup>0</sup> | y <sup>0++</sup> | # |
|---|-----------------|-----------------|-----------------|------------------|-----------------|------------------|------|-----------------|-----------------|----------|------------------|----------------|------------------|---|
| 1 | 203.1663        | 102.0868        | 186.1397        | 93.5735          |                 |                  | K    |                 |                 |          |                  |                |                  | 9 |
| 2 | <b>290.1983</b> | 145.6028        | 273.1718        | 137.0895         | <b>272.1878</b> | 136.5975         | S    | <b>829.4526</b> | 415.2300        | 812.4261 | 406.7167         | 811.4421       | 406.2247         | 8 |
| 3 | <b>391.2460</b> | 196.1266        | 374.2194        | 187.6134         | 373.2354        | 187.1214         | T    | <b>742.4206</b> | 371.7139        | 725.3941 | <b>363.2007</b>  | 724.4100       | <b>362.7087</b>  | 7 |
| 4 | <b>448.2675</b> | 224.6374        | 431.2409        | 216.1241         | 430.2569        | 215.6321         | G    | <b>641.3729</b> | 321.1901        | 624.3464 | 312.6768         |                |                  | 6 |
| 5 | 505.2889        | 253.1481        | 488.2624        | <b>244.6348</b>  | 487.2784        | <b>244.1428</b>  | G    | <b>584.3515</b> | 292.6794        | 567.3249 | 284.1661         |                |                  | 5 |
| 6 | 689.4101        | 345.2087        | 672.3836        | 336.6954         | 671.3995        | 336.2034         | K    | <b>527.3300</b> | 264.1686        | 510.3035 | 255.6554         |                |                  | 4 |
| 7 | <b>760.4472</b> | 380.7272        | <b>743.4207</b> | 372.2140         | <b>742.4367</b> | 371.7220         | A    | <b>343.2088</b> | 172.1081        | 326.1823 | 163.5948         |                |                  | 3 |
| 8 | <b>857.5000</b> | 429.2536        | 840.4734        | 420.7404         | <b>839.4894</b> | 420.2483         | P    | <b>272.1717</b> | 136.5895        | 255.1452 | 128.0762         |                |                  | 2 |
| 9 |                 |                 |                 |                  |                 |                  | R    | <b>175.1190</b> | 88.0631         | 158.0924 | 79.5498          |                |                  | 1 |

Match to Query 18785: 2606.383092 from(869.801640,3+) intensity(51321.1563)  
 Title: File2098 Spectrum9005 scans: 10134  
 Data file I:\2013-12-05-SIMM7721-FR3-ZW.mgf

Click mouse within plot area to zoom in by factor of two about that point

Or,   to  Da

Label all possible matches  Label matches used for scoring

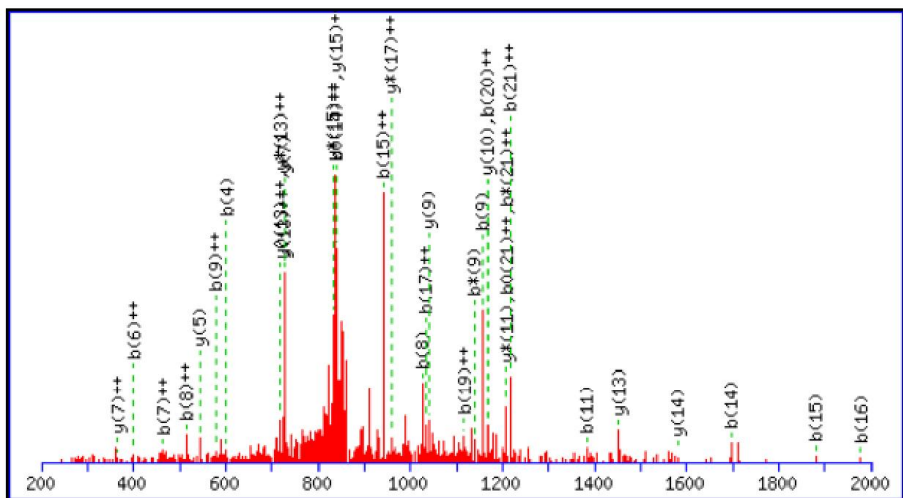

Monoisotopic mass of neutral peptide Mr(calc): 2606.3824  
 Fixed modifications: Carbamidomethyl (C) (apply to specified residues or termini only)  
 Variable modifications:  
 K1 : Propionyl (K)  
 K3 : Propionyl-(13CD3)Methyl (K)  
 K15 : Propionyl (K)  
 Ions Score: 31 Expect: 0.61  
 Matches : 35/242 fragment ions using 79 most intense peaks ([help](#))

| #  | b                | b <sup>++</sup>  | b <sup>*</sup> | b <sup>++</sup>  | b <sup>0</sup> | b <sup>0++</sup> | Seq. | y                | y <sup>++</sup> | y <sup>*</sup>   | y <sup>++</sup> | y <sup>0</sup> | y <sup>0++</sup> | #  |
|----|------------------|------------------|----------------|------------------|----------------|------------------|------|------------------|-----------------|------------------|-----------------|----------------|------------------|----|
| 1  | 185.1285         | 93.0679          | 168.1019       | 84.5546          |                |                  | K    |                  |                 |                  |                 |                |                  | 22 |
| 2  | 284.1969         | 142.6021         | 267.1703       | 134.0888         |                |                  | V    | 2423.2685        | 1212.1379       | 2406.2420        | 1203.6246       | 2405.2580      | 1203.1326        | 21 |
| 3  | 486.3559         | 243.6816         | 469.3293       | 235.1683         |                |                  | K    | 2324.2001        | 1162.6037       | 2307.1736        | 1154.0904       | 2306.1896      | 1153.5984        | 20 |
| 4  | <b>601.3828</b>  | 301.1951         | 584.3563       | 292.6818         | 583.3723       | 292.1898         | D    | 2122.0411        | 1061.5242       | 2105.0146        | 1053.0109       | 2104.0305      | 1052.5189        | 19 |
| 5  | 672.4199         | 336.7136         | 655.3934       | 328.2003         | 654.4094       | 327.7083         | A    | 2007.0142        | 1004.0107       | 1989.9876        | 995.4974        | 1989.0036      | 995.0054         | 18 |
| 6  | 800.4785         | <b>400.7429</b>  | 783.4520       | 392.2296         | 782.4680       | 391.7376         | Q    | 1935.9770        | 968.4922        | 1918.9505        | <b>959.9789</b> | 1917.9665      | 959.4869         | 17 |
| 7  | 928.5371         | <b>464.7722</b>  | 911.5105       | 456.2589         | 910.5265       | 455.7669         | Q    | 1807.9185        | 904.4629        | 1790.8919        | 895.9496        | 1789.9079      | 895.4576         | 16 |
| 8  | <b>1027.6055</b> | <b>514.3064</b>  | 1010.5790      | 505.7931         | 1009.5949      | 505.3011         | V    | 1679.8599        | <b>840.4336</b> | 1662.8333        | <b>831.9203</b> | 1661.8493      | 831.4283         | 15 |
| 9  | <b>1156.6481</b> | <b>578.8277</b>  | 1139.6216      | 570.3144         | 1138.6375      | 569.8224         | E    | <b>1580.7915</b> | 790.8994        | 1563.7649        | 782.3861        | 1562.7809      | 781.8941         | 14 |
| 10 | 1253.7009        | 627.3541         | 1236.6743      | 618.8408         | 1235.6903      | 618.3488         | P    | <b>1451.7489</b> | <b>726.3781</b> | 1434.7223        | <b>717.8648</b> | 1433.7383      | <b>717.3728</b>  | 13 |
| 11 | <b>1382.7435</b> | 691.8754         | 1365.7169      | 683.3621         | 1364.7329      | 682.8701         | E    | 1354.6961        | 677.8517        | 1337.6696        | 669.3384        | 1336.6856      | 668.8464         | 12 |
| 12 | 1439.7649        | 720.3861         | 1422.7384      | 711.8728         | 1421.7544      | 711.3808         | G    | 1225.6535        | 613.3304        | <b>1208.6270</b> | 604.8171        | 1207.6430      | 604.3251         | 11 |
| 13 | 1567.8235        | 784.4154         | 1550.7970      | 775.9021         | 1549.8129      | 775.4101         | Q    | <b>1168.6321</b> | 584.8197        | 1151.6055        | 576.3064        | 1150.6215      | 575.8144         | 10 |
| 14 | <b>1696.8661</b> | 848.9367         | 1679.8395      | <b>840.4234</b>  | 1678.8555      | <b>839.9314</b>  | E    | <b>1040.5735</b> | 520.7904        | 1023.5469        | 512.2771        | 1022.5629      | 511.7851         | 9  |
| 15 | <b>1880.9873</b> | <b>940.9973</b>  | 1863.9607      | 932.4840         | 1862.9767      | 931.9920         | K    | 911.5309         | 456.2691        | 894.5043         | 447.7558        | 893.5203       | 447.2638         | 8  |
| 16 | <b>1978.0400</b> | 989.5237         | 1961.0135      | 981.0104         | 1960.0295      | 980.5184         | P    | <b>727.4097</b>  | <b>364.2085</b> | 710.3832         | 355.6952        | 709.3991       | 355.2032         | 7  |
| 17 | 2065.0721        | <b>1033.0397</b> | 2048.0455      | 1024.5264        | 2047.0615      | 1024.0344        | S    | 630.3570         | 315.6821        | 613.3304         | 307.1688        | 612.3464       | 306.6768         | 6  |
| 18 | 2162.1248        | 1081.5661        | 2145.0983      | 1073.0528        | 2144.1143      | 1072.5608        | P    | <b>543.3249</b>  | 272.1661        | 526.2984         | 263.6528        | 525.3144       | 263.1608         | 5  |
| 19 | 2233.1619        | <b>1117.0846</b> | 2216.1354      | 1108.5713        | 2215.1514      | 1108.0793        | A    | 446.2722         | 223.6397        | 429.2456         | 215.1264        | 428.2616       | 214.6344         | 4  |
| 20 | 2334.2096        | <b>1167.6084</b> | 2317.1831      | 1159.0952        | 2316.1991      | 1158.6032        | T    | 375.2350         | 188.1212        | 358.2085         | 179.6079        | 357.2245       | 179.1159         | 3  |
| 21 | 2433.2780        | <b>1217.1427</b> | 2416.2515      | <b>1208.6294</b> | 2415.2675      | <b>1208.1374</b> | V    | 274.1874         | 137.5973        | 257.1608         | 129.0840        |                |                  | 2  |
| 22 |                  |                  |                |                  |                |                  | R    | 175.1190         | 88.0631         | 158.0924         | 79.5498         |                |                  | 1  |

Found in **P10412**, Histone H1.4 OS=Homo sapiens GN=HIST1H1E PE=1 SV=2

Match to Query 1072: 917.558868 from(459.786710, 2+) intensity(306989.3438)  
 Title: File2082 Spectrum3083 scans: 3873  
 Data file I:\2013-12-05-SIMM7721-FR2-ZW.mgf

Click mouse within plot area to zoom in by factor of two about that point

Or,   to  Da Label all possible matches  Label matches used for scoring 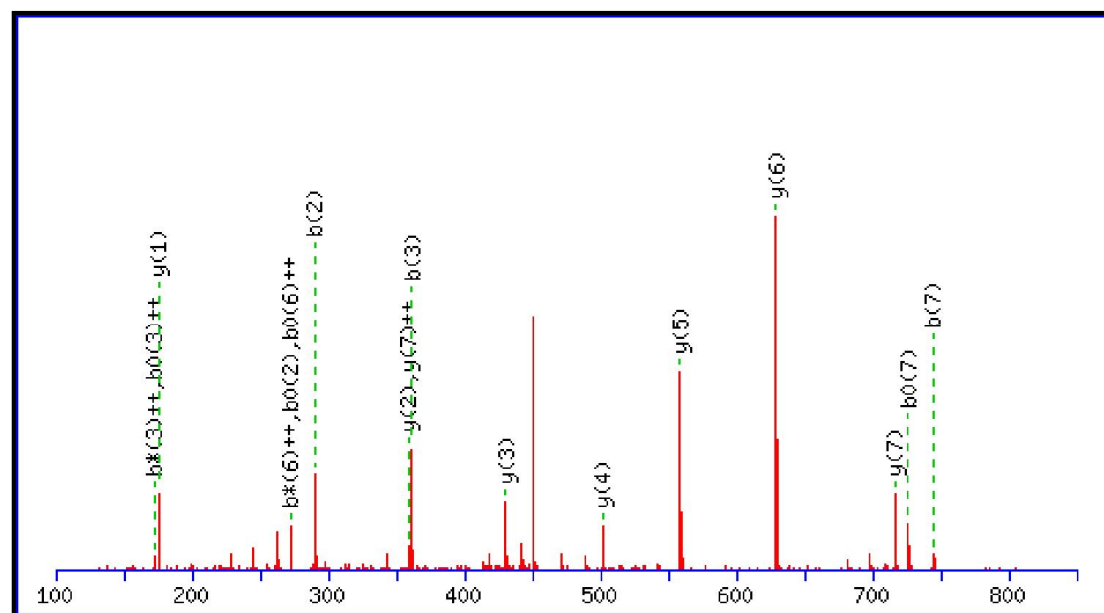Monoisotopic mass of neutral peptide  $M_r(\text{calc})$ : 917.5567

Fixed modifications: Carbamidomethyl (C) (apply to specified residues or termini only)

Variable modifications:

**K1** : Propionyl-(13CD3)Methyl (K)**K7** : Propionyl (K)Ions Score: 63 **Expect:** 0.00012**Matches** : 17/70 fragment ions using 21 most intense peaks

| # | b               | b <sup>++</sup> | b*       | b <sup>+++</sup> | b <sup>0</sup>  | b <sup>0++</sup> | Seq. | y               | y <sup>++</sup> | y*       | y <sup>+++</sup> | y <sup>0</sup> | y <sup>0++</sup> | # |
|---|-----------------|-----------------|----------|------------------|-----------------|------------------|------|-----------------|-----------------|----------|------------------|----------------|------------------|---|
| 1 | 203.1663        | 102.0868        | 186.1397 | 93.5735          |                 |                  | K    |                 |                 |          |                  |                |                  | 8 |
| 2 | <b>290.1983</b> | 145.6028        | 273.1718 | 137.0895         | <b>272.1878</b> | 136.5975         | S    | <b>716.4050</b> | <b>358.7061</b> | 699.3784 | 350.1923         | 698.3944       | 349.7008         | 7 |
| 3 | <b>361.2354</b> | 181.1214        | 344.2089 | <b>172.6081</b>  | 343.2249        | <b>172.1161</b>  | A    | <b>629.3729</b> |                 | 315.1901 | 612.3464         | 306.6763       |                  | 6 |
| 4 | 418.2569        | 209.6321        | 401.2303 | 201.1188         | 400.2463        | 200.6268         | G    | <b>558.3358</b> | 279.6715        | 541.3093 | 271.1583         |                |                  | 5 |
| 5 | 489.2940        | 245.1506        | 472.2675 | 236.6374         | 471.2834        | 236.1454         | A    | <b>501.3144</b> | 251.1608        | 484.2878 | 242.6475         |                |                  | 4 |
| 6 | 560.3311        | 280.6692        | 543.3046 | <b>272.1559</b>  | 542.3206        | <b>271.6639</b>  | A    | <b>430.2772</b> | 215.6423        | 413.2507 | 207.1290         |                |                  | 3 |
| 7 | <b>744.4523</b> | 372.7298        | 727.4258 | 364.2165         | <b>726.4417</b> | 363.7245         | K    | <b>359.2401</b> | 180.1237        | 342.2136 | 171.6104         |                |                  | 2 |
| 8 |                 |                 |          |                  |                 |                  | R    | <b>175.1190</b> | 88.0631         | 158.0924 | 79.5498          |                |                  | 1 |



Found in **Q7Z3U7**, Protein MON2 homolog OS=Homo sapiens GN=MON2 PE=1 SV=2

Match to Query 179392666.420096 from(667.612300, 4+) intensity(304631.7500)

Title: File2082 Spectrum19148 scans: 20680

Data file I:\2013-12-05-SIMM7721-FR2-ZW.mgf

Click mouse within plot area to zoom in by factor of two about that point

Or,   to  Da Label all possible matches  Label matches used for scoring 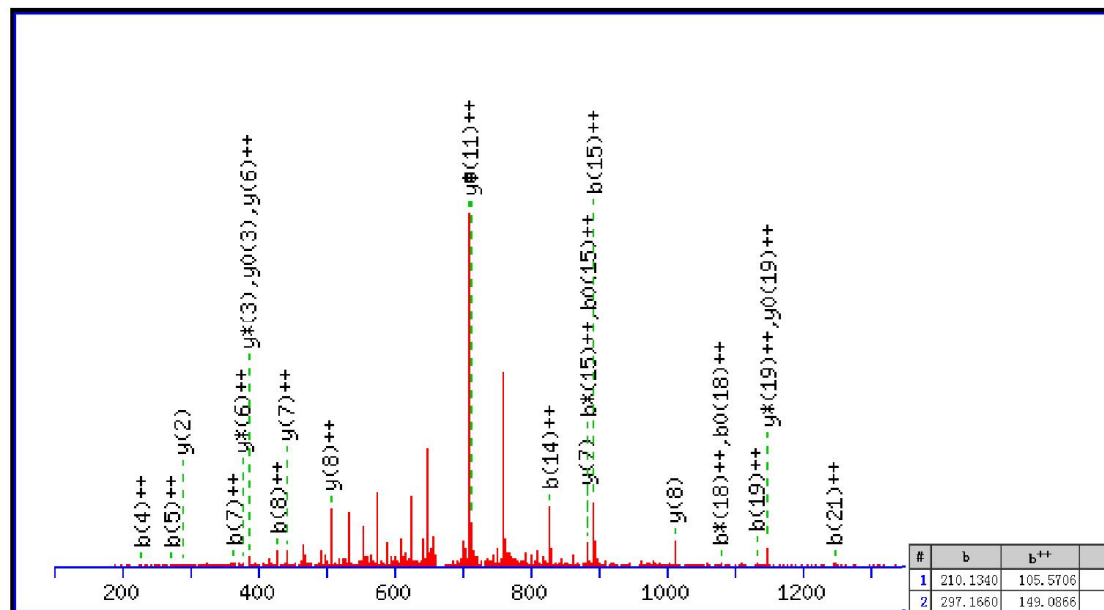**Monoisotopic mass of neutral peptide Mr(calc): 2666.4353****Fixed modifications:** Carbamidomethyl (C) (apply to specified)**Variable modifications:****N-term :** Propionyl-(13CD3)Methyl (Protein N-term)**M1 :** Label:13C(1)2H(3) (M)**K11 :** Propionyl-(13CD3)Methyl (K)**K12 :** Propionyl-(13CD3)Methyl (K)**M17 :** Label:13C(1)2H(3)+Oxidation (M)**Ions Score: 22 Expect: 4.5****Matches : 25/226 fragment ions using 53 most intense peaks**

| #  | b         | b <sup>++</sup>  | b*        | b <sup>+++</sup> | b <sup>0</sup> | b <sup>0++</sup> | Seq.     | y                | y <sup>++</sup> | y*              | y <sup>+++</sup> | y <sup>0</sup>  | y <sup>0++</sup> | #  |
|----|-----------|------------------|-----------|------------------|----------------|------------------|----------|------------------|-----------------|-----------------|------------------|-----------------|------------------|----|
| 1  | 210.1340  | 105.5706         |           |                  |                |                  | <b>I</b> |                  |                 |                 |                  |                 |                  | 22 |
| 2  | 297.1660  | 149.0866         |           |                  | 279.1555       | 140.0814         | S        | 2458.3159        | 1229.6616       | 2441.2894       | 1221.1483        | 2440.3054       | 1220.6563        | 21 |
| 3  | 354.1875  | 177.5974         |           |                  | 336.1769       | 168.5921         | G        | 2371.2839        | 1186.1456       | 2354.2574       | 1177.6323        | 2353.2733       | 1177.1403        | 20 |
| 4  | 455.2352  | <b>238.1212</b>  |           |                  | 437.2246       | 219.1159         | T        | 2314.2624        | 1157.6349       | 2297.2359       | 1149.1216        | 2296.2519       | 1148.6296        | 19 |
| 5  | 542.2632  | <b>271.6372</b>  |           |                  | 524.2566       | 262.6320         | S        | 2213.2148        | 1107.1110       | 2196.1882       | 1098.5977        | 2195.2042       | 1098.1057        | 18 |
| 6  | 629.2992  | 315.1532         |           |                  | 611.2887       | 306.1480         | S        | 2126.1827        | 1063.5950       | 2109.1562       | 1065.0817        | 2108.1722       | 1054.5897        | 17 |
| 7  | 726.3520  | <b>363.6796</b>  |           |                  | 708.3414       | 354.6743         | P        | 2039.1507        | 1020.0790       | 2022.1242       | 1011.5657        | 2021.1401       | 1011.0737        | 16 |
| 8  | 855.3946  | <b>428.2009</b>  |           |                  | 837.3840       | 419.1956         | E        | 1942.0979        | 971.5526        | 1925.0714       | 963.0393         | 1924.0874       | 962.5473         | 15 |
| 9  | 926.4317  | 463.7195         |           |                  | 908.4211       | 454.7142         | A        | 1813.0554        | 907.0313        | 1796.0288       | 898.5180         | 1795.0448       | 898.0260         | 14 |
| 10 | 1025.5001 | 513.2537         |           |                  | 1007.4895      | 504.2484         | V        | 1742.0182        | 871.5128        | 1724.9917       | 862.9996         | 1724.0077       | 862.5075         | 13 |
| 11 | 1227.6591 | 614.3332         | 1210.6326 | 605.8199         | 1209.6486      | 605.3279         | K        | 1642.9498        | 821.9786        | 1625.9233       | 813.4653         | 1624.9393       | 812.9733         | 12 |
| 12 | 1429.8181 | 715.4127         | 1412.7916 | 706.8994         | 1411.3076      | 706.4074         | K        | 1440.7908        | 720.8990        | 1423.7643       | 712.3859         | 1422.7802       | 711.8938         | 11 |
| 13 | 1542.9022 | 771.9547         | 1525.8756 | 763.4415         | 1524.8916      | 762.9495         | L        | 1238.6318        | 619.8195        | 1221.6052       | 611.3063         | 1220.6212       | 610.8143         | 10 |
| 14 | 1655.9863 | <b>828.4968</b>  | 1638.9597 | 819.9835         | 1637.9757      | 819.4915         | L        | 1125.5477        | 563.2775        | 1108.5212       | 554.7642         | 1107.5372       | 554.2722         | 9  |
| 15 | 1785.0289 | <b>893.0181</b>  | 1768.0023 | <b>884.5048</b>  | 1767.0183      | <b>884.0128</b>  | E        | <b>1012.4637</b> | <b>506.7355</b> | 995.4371        | 498.2222         | 994.4531        | 497.7302         | 8  |
| 16 | 1899.0718 | 950.0395         | 1882.0452 | 941.5263         | 1881.0612      | 941.0342         | N        | <b>883.4211</b>  | <b>442.2142</b> | 866.3945        | 433.7009         | 865.4105        | 433.2089         | 7  |
| 17 | 2050.1294 | 1025.5683        | 2033.1028 | 1017.0550        | 2032.1188      | 1016.5630        | I        | 769.3782         | <b>385.1927</b> | <b>752.3516</b> | <b>376.6794</b>  | 751.3676        | 376.1874         | 6  |
| 18 | 2178.1879 | 1089.5976        | 2161.1614 | <b>1081.0843</b> | 2160.1774      | <b>1080.5923</b> | Q        | 618.3206         | 309.6639        | 601.2940        | 301.1506         | 600.3100        | 300.6586         | 5  |
| 19 | 2265.2200 | <b>1133.1136</b> | 2248.1934 | 1124.6003        | 2247.2094      | 1124.1083        | S        | 490.2620         | 245.6346        | 473.2354        | 237.1214         | 472.2514        | 236.6293         | 4  |
| 20 | 2380.2469 | 1190.6271        | 2363.2204 | 1182.1138        | 2362.2364      | 1181.6218        | D        | 403.2300         | 202.1186        | <b>386.2034</b> | 193.6053         | <b>385.2194</b> | 193.1133         | 3  |
| 21 | 2493.3310 | <b>1247.1691</b> | 2476.3044 | 1238.6559        | 2475.3204      | 1238.1638        | L        | <b>288.2030</b>  | 144.6051        | 271.1765        | 136.0919         |                 |                  | 2  |
| 22 | 175.1190  | 88.0631          |           |                  | 175.1190       | 88.0631          | R        |                  |                 | 158.0924        | 79.5498          |                 |                  | 1  |

MS/MS Fragmentation of **MKDHR**

Found in **HOY3K4**, RNA-binding protein 33 (Fragment) OS=Homo sapiens GN=RBM33 PE=4 SV=1

Match to Query 331: 763.419588 from(382.717070, 2+) intensity(6006.1816)

Title: File2082 Spectrum521 scans: 1102

Data file I:\2013-12-05-SIMM7721-FR2-ZW.mgf

Click mouse within plot area to zoom in by factor of two about that point

Or,   to  Da

Label all possible matches  Label matches used for scoring

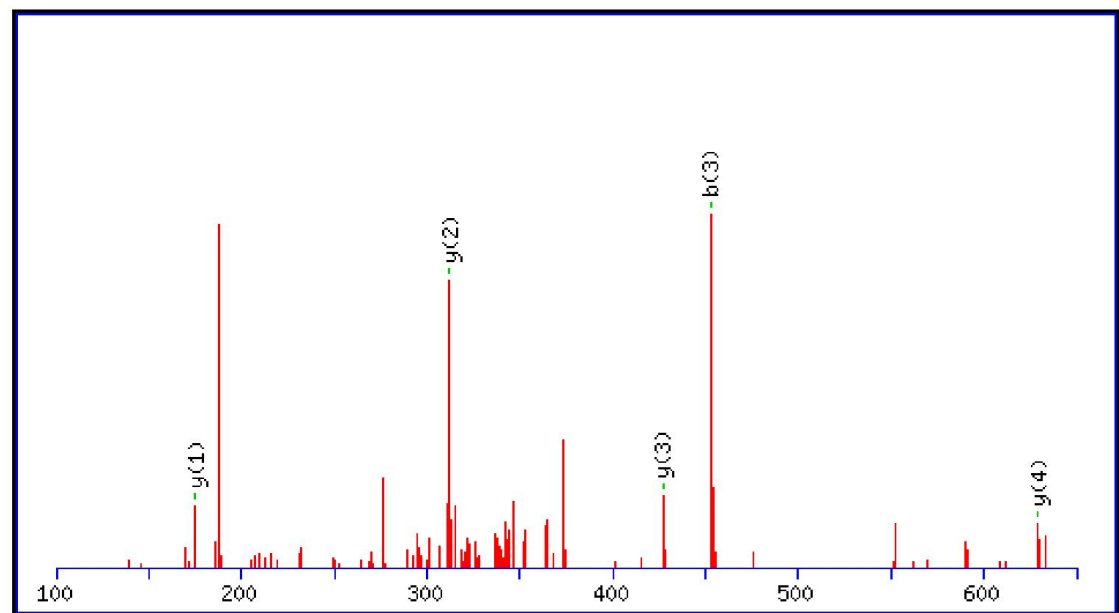

**Monoisotopic mass of neutral peptide Mr(calc):** 763.4192

**Fixed modifications:** Carbamidomethyl (C) (apply to spec)

**Variable modifications:**

**M1** : Label:13C(1)2H(3) (M)

**K2** : Propionyl-(13CD3)Methyl (K)

**Ions Score:** 25 **Expect:** 0.79

**Matches** : 5/38 fragment ions using 10 most intense peaks

| # | b        | b <sup>++</sup> | b <sup>+</sup> | b <sup>+++</sup> | b <sup>0</sup> | b <sup>0++</sup> | Seq. | y        | y <sup>++</sup> | y <sup>+</sup> | y <sup>+++</sup> | y <sup>0</sup> | y <sup>0++</sup> | # |
|---|----------|-----------------|----------------|------------------|----------------|------------------|------|----------|-----------------|----------------|------------------|----------------|------------------|---|
| 1 | 136.0699 | 68.5386         |                |                  |                |                  | I    |          |                 |                |                  |                |                  | 5 |
| 2 | 338.2290 | 169.6181        | 321.2024       | 161.1048         |                |                  | K    | 629.3638 | 315.1855        | 612.3373       | 306.6723         | 611.3533       | 306.1803         | 4 |
| 3 | 453.2559 | 227.1316        | 436.2294       | 218.6183         | 435.2453       | 218.1263         | D    | 427.2048 | 214.1060        | 410.1783       | 205.5928         | 409.1942       | 205.1008         | 3 |
| 4 | 590.3148 | 295.6610        | 573.2683       | 287.1478         | 572.3042       | 286.6558         | H    | 312.1779 | 156.5926        | 295.1513       | 148.0793         |                |                  | 2 |
| 5 |          |                 |                |                  |                |                  | R    | 175.1190 | 88.0631         | 158.0924       | 79.5498          |                |                  | 1 |

Found in **H3BS19**, Zinc finger protein 469 OS=Homo sapiens GN=ZNF469 PE=2 SV=1

Match to Query 2637: 982.584568 from(492.299560, 2+) intensity(290206.9688)

Title: File2082 Spectrum22 scans: 254

Data file I:\2013-12-05-SIMM7721-FR2-ZW.mgf

Click mouse within plot area to zoom in by factor of two about that point

Or,   to  Da Label all possible matches  Label matches used for scoring 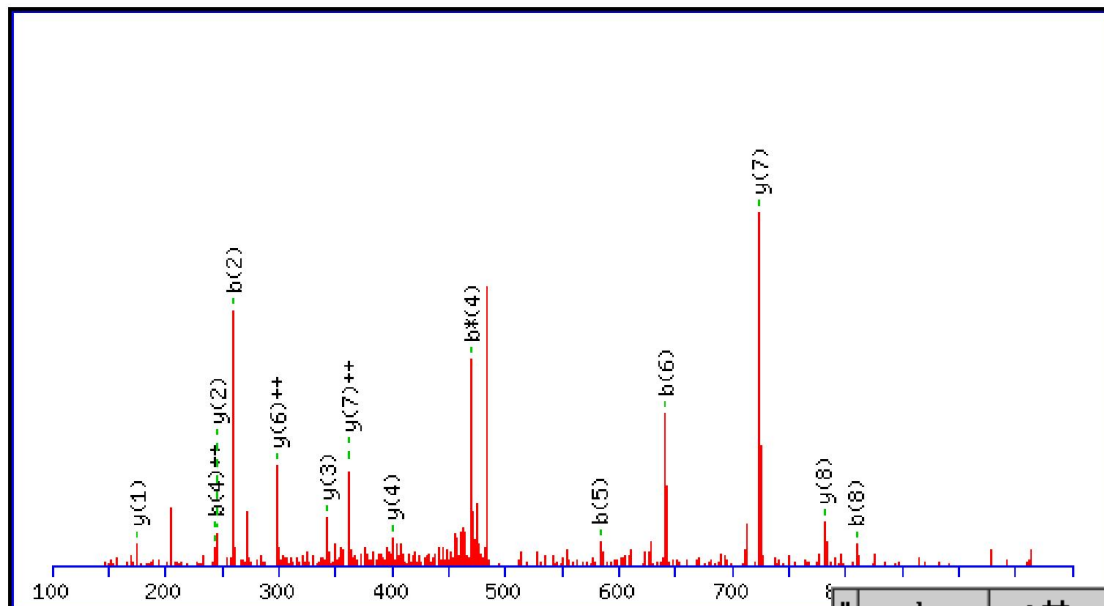**Monoisotopic mass of neutral peptide Mr(calc):** 982.5**Fixed modifications:** Carbamidomethyl (C) (apply to speci**Variable modifications:****K1** : Propionyl-(13CD3)Methyl (K)**Ions Score:** 28 **Expect:** 0.41**Matches** : 14/64 fragment ions using 36 most intense peaks

| # | b               | b <sup>++</sup> | b*              | b <sup>*++</sup> | Seq. | y               | y <sup>++</sup> | y*       | y <sup>*++</sup> | # |
|---|-----------------|-----------------|-----------------|------------------|------|-----------------|-----------------|----------|------------------|---|
| 1 | 203.1663        | 102.0868        | 186.1397        | 93.5735          | K    |                 |                 |          |                  | 9 |
| 2 | <b>260.1878</b> | 130.5975        | 243.1612        | 122.0842         | G    | <b>781.4315</b> | 391.2194        | 764.4050 | 382.7061         | 8 |
| 3 | 388.2463        | 194.6268        | 371.2198        | 186.1135         | Q    | <b>724.4101</b> | <b>362.7087</b> | 707.3835 | 354.1954         | 7 |
| 4 | 487.3147        | <b>244.1610</b> | <b>470.2882</b> | 235.6477         | V    | 596.3515        | <b>298.6794</b> | 579.3249 | 290.1661         | 6 |
| 5 | <b>584.3675</b> | 292.6874        | 567.3410        | 284.1741         | P    | 497.2831        | 249.1452        | 480.2565 | 240.6319         | 5 |
| 6 | <b>641.3890</b> | 321.1981        | 624.3624        | 312.6849         | G    | <b>400.2303</b> | 200.6188        | 383.2037 | 192.1055         | 4 |
| 7 | 738.4417        | 369.7245        | 721.4152        | 361.2112         | P    | <b>343.2088</b> | 172.1081        | 326.1823 | 163.5948         | 3 |
| 8 | <b>809.4789</b> | 405.2431        | 792.4523        | 396.7298         | A    | <b>246.1561</b> | 123.5817        | 229.1295 | 115.0684         | 2 |
| 9 |                 |                 |                 |                  | R    | <b>175.1190</b> | 88.0631         | 158.0924 | 79.5498          | 1 |

Match to Query 501: 785.505048 from(393.759800,2+) intensity(10186.5068)

Title: File2082 Spectrum2815 scans: 3592

Data file I:\2013-12-05-SIMM7721-FR2-ZW.mgf

Click mouse within plot area to zoom in by factor of two about that point

Or,   to  DaLabel all possible matches  Label matches used for scoring 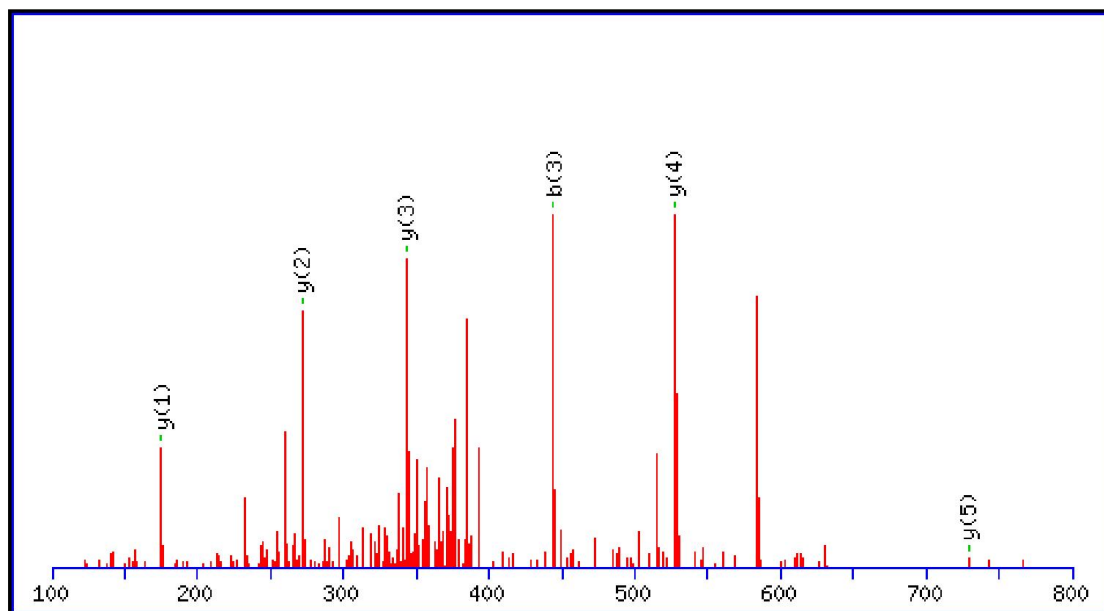Monoisotopic mass of neutral peptide **Mr(calc)**: 785.51

Fixed modifications: Carbamidomethyl (C) (apply to speci

Variable modifications:

**K2** : Propionyl-(13CD3)Methyl (K)**K3** : Propionyl (K)

Ions Score: 42 Expect: 0.012

Matches : 6/38 fragment ions using 7 most intense peaks

| # | b               | b <sup>++</sup> | b*       | b <sup>+++</sup> | Seq.     | y               | y <sup>++</sup> | y*       | y <sup>+++</sup> | #        |
|---|-----------------|-----------------|----------|------------------|----------|-----------------|-----------------|----------|------------------|----------|
| 1 | 58.0287         | 29.5180         |          |                  | <b>G</b> |                 |                 |          |                  | <b>6</b> |
| 2 | 260.1878        | 130.5975        | 243.1612 | 122.0842         | <b>K</b> | <b>729.4890</b> | 365.2481        | 712.4625 | 356.7349         | <b>5</b> |
| 3 | <b>444.3089</b> | 222.6581        | 427.2824 | 214.1448         | <b>K</b> | <b>527.3300</b> | 264.1686        | 510.3035 | 255.6554         | <b>4</b> |
| 4 | 515.3460        | 258.1767        | 498.3195 | 249.6634         | <b>A</b> | <b>343.2088</b> | 172.1081        | 326.1823 | 163.5948         | <b>3</b> |
| 5 | 612.3988        | 306.7030        | 595.3723 | 298.1898         | <b>P</b> | <b>272.1717</b> | 136.5895        | 255.1452 | 128.0762         | <b>2</b> |
| 6 |                 |                 |          |                  | <b>R</b> | <b>175.1190</b> | 88.0631         | 158.0924 | 79.5498          | <b>1</b> |

Match to Query 7439: 1284.803448 from(643.409000, 2+) intensity(195956.1094)

Title: File2082 Spectrum10107 scans: 11217

Data file I:\2013-12-05-SIMM7721-FR2-ZW.mgf

Click mouse within plot area to zoom in by factor of two about that point

Or,   to  Da Label all possible matches  Label matches used for scoring 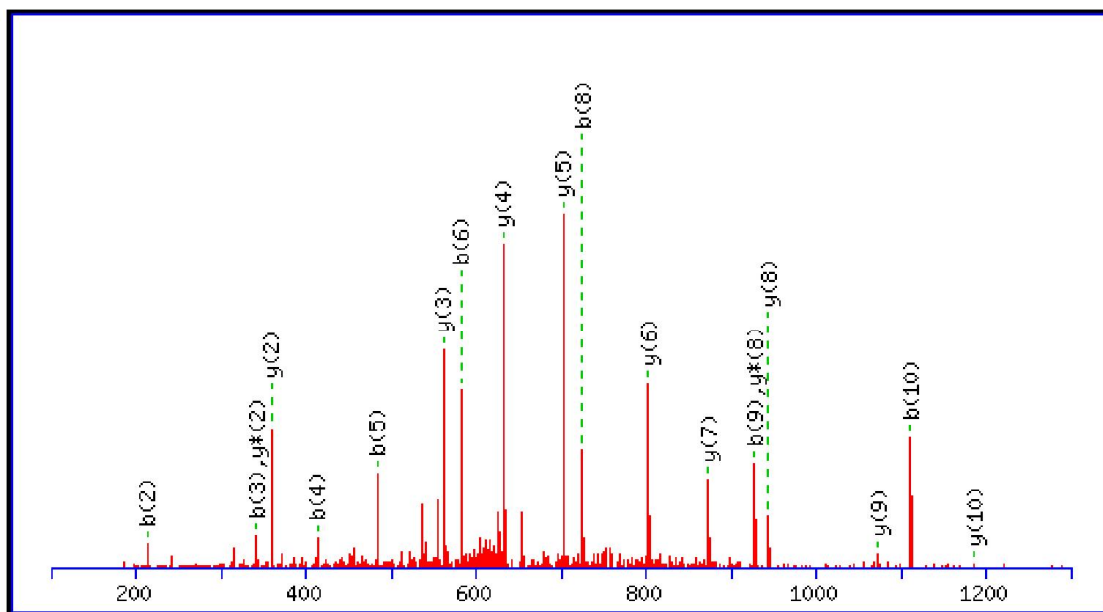Monoisotopic mass of neutral peptide **Mr(calc): 1284.803448**

Fixed modifications: Carbamidomethyl (C) (apply to spe

Variable modifications:

**K9** : Propionyl-(13CD3)Methyl (K)**K10** : Propionyl (K)

Ions Score: 84 Expect: 7.3e-007

Matches : 19/84 fragment ions using 22 most intense peak

| #  | b                | b <sup>++</sup> | b <sup>*</sup> | b <sup>++*</sup> | b <sup>0</sup> | b <sup>0++</sup> | Seq. | y                | y <sup>++</sup> | y <sup>*</sup>  | y <sup>++*</sup> | y <sup>0</sup> | y <sup>0++</sup> | #  |
|----|------------------|-----------------|----------------|------------------|----------------|------------------|------|------------------|-----------------|-----------------|------------------|----------------|------------------|----|
| 1  | 100.0757         | 50.5415         |                |                  |                |                  | V    |                  |                 |                 |                  |                |                  | 11 |
| 2  | <b>213.1598</b>  | 107.0835        |                |                  |                |                  | L    | <b>1186.7427</b> | 593.3750        | 1169.7161       | 585.3617         | 1168.7321      | 584.8697         | 10 |
| 3  | <b>342.2023</b>  | 171.6048        |                |                  | 324.1918       | 162.5995         | E    | <b>1073.6586</b> | 537.3329        | 1056.6321       | 528.8197         | 1055.6480      | 528.3277         | 9  |
| 4  | <b>413.2395</b>  | 207.1234        |                |                  | 395.2289       | 198.1181         | A    | <b>944.6160</b>  | 472.8116        | <b>927.5895</b> | 464.2984         |                |                  | 8  |
| 5  | <b>484.2766</b>  | 242.6419        |                |                  | 466.2660       | 233.6366         | A    | <b>873.5789</b>  | 437.2931        | 856.5523        | 428.7798         |                |                  | 7  |
| 6  | <b>583.3450</b>  | 292.1761        |                |                  | 565.3344       | 283.1708         | V    | <b>802.5418</b>  | 401.7745        | 785.5152        | 393.2613         |                |                  | 6  |
| 7  | 654.3821         | 327.6947        |                |                  | 636.3715       | 318.6894         | A    | <b>703.4734</b>  | 352.2403        | 686.4468        | 343.7270         |                |                  | 5  |
| 8  | <b>725.4192</b>  | 363.2132        |                |                  | 707.4087       | 354.2080         | A    | <b>632.4363</b>  | 316.7218        | 615.4097        | 308.2085         |                |                  | 4  |
| 9  | <b>927.5782</b>  | 464.2928        | 910.5517       | 455.7795         | 909.5677       | 455.2875         | K    | <b>561.3997</b>  | 281.2032        | 544.3726        | 272.6899         |                |                  | 3  |
| 10 | <b>1111.6994</b> | 556.3533        | 1094.6729      | 547.8401         | 1093.6888      | 547.3481         | K    | <b>359.2401</b>  | 180.1237        | <b>342.2136</b> | 171.6104         |                |                  | 2  |
| 11 |                  |                 |                |                  |                |                  | R    | 175.1190         | 88.0631         | 158.0924        | 79.5498          |                |                  | 1  |

Found in **Q6P1J9**, Parafibromin OS=Homo sapiens GN=CDC73 PE=1 SV=1

Match to Query 8100: 1366.784148 from(684.399350,2+) intensity(13853.9492)

Title: File2079 Spectrum3458 scans: 4218

Data file I:\2013-12-05-SIMM7721-FR4-ZW.mgf

Click mouse within plot area to zoom in by factor of two about that point

Or,   to  Da Label all possible matches  Label matches used for scoring 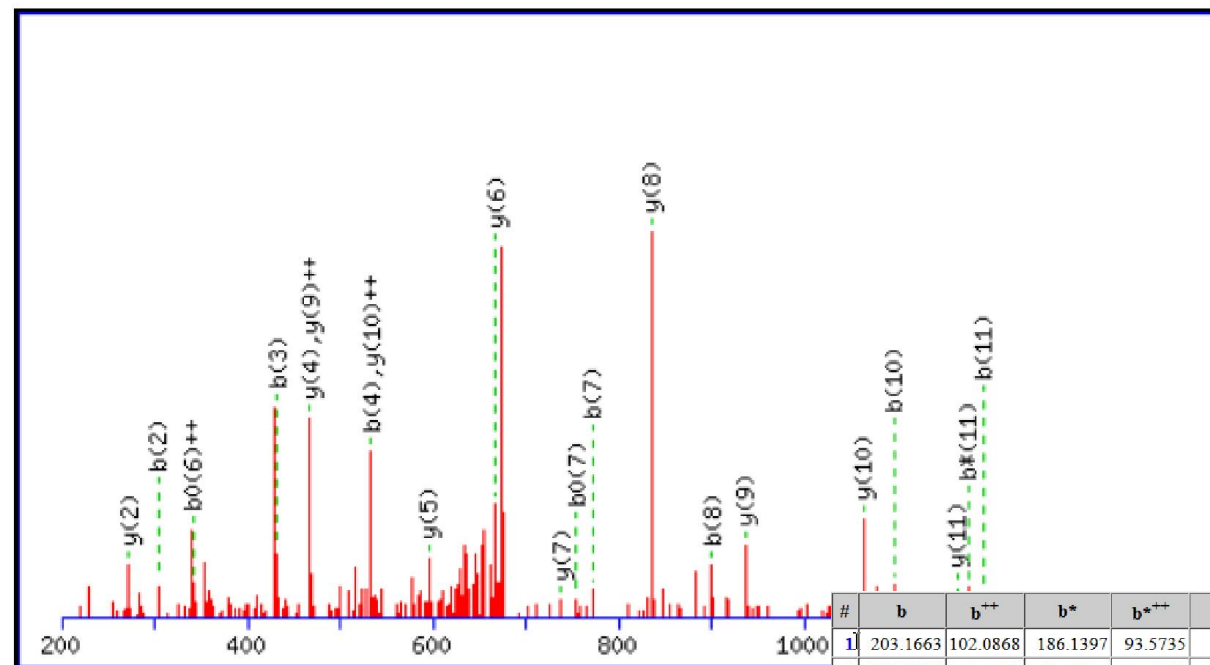

Monoisotopic mass of neutral peptide Mr(calc): 1366

Fixed modifications: Carbamidomethyl (C) (apply to

Variable modifications:

K1 : Propionyl-(13CD3)Methyl (K)

Ions Score: 68 Expect: 5.7e-005

Matches : 21/114 fragment ions using 31 most intens

| #  | b                | b <sup>++</sup> | b <sup>*</sup>   | b <sup>+++</sup> | b <sup>0</sup>  | b <sup>0++</sup> | Seq. | y                | y <sup>++</sup> | y <sup>*</sup> | y <sup>+++</sup> | y <sup>0</sup> | y <sup>0++</sup> | #  |
|----|------------------|-----------------|------------------|------------------|-----------------|------------------|------|------------------|-----------------|----------------|------------------|----------------|------------------|----|
| 1  | 203.1663         | 102.0868        | 186.1397         | 93.5735          |                 |                  | K    |                  |                 |                |                  |                |                  | 12 |
| 2  | <b>304.2140</b>  | 152.6106        | 287.1874         | 144.0973         | 286.2034        | 143.6053         | T    | <b>1165.6324</b> | 583.3198        | 1148.6059      | 574.8066         | 1147.6218      | 574.3146         | 11 |
| 3  | <b>432.2725</b>  | 216.6399        | 415.2460         | 208.1266         | 414.2620        | 207.6346         | Q    | <b>1064.5847</b> | <b>532.7960</b> | 1047.5582      | 524.2827         | 1046.5742      | 523.7907         | 10 |
| 4  | <b>533.3202</b>  | 267.1638        | 516.2937         | 258.6505         | 515.3097        | 258.1585         | T    | <b>936.5261</b>  | <b>468.7667</b> | 919.4996       | 460.2534         | 918.5156       | 459.7614         | 9  |
| 5  | 630.3730         | 315.6901        | 613.3464         | 307.1769         | 612.3624        | 306.6849         | P    | <b>835.4785</b>  | 418.2429        | 818.4519       | 409.7296         |                |                  | 8  |
| 6  | 701.4101         | 351.2087        | 684.3836         | 342.6954         | 683.3995        | <b>342.2034</b>  | A    | <b>738.4257</b>  | 369.7165        | 721.3992       | 361.2032         |                |                  | 7  |
| 7  | <b>772.4472</b>  | 386.7272        | 755.4207         | 378.2140         | <b>754.4367</b> | 377.7220         | A    | <b>667.3886</b>  | 334.1979        | 650.3620       | 325.6847         |                |                  | 6  |
| 8  | <b>900.5058</b>  | 450.7565        | 883.4792         | 442.2433         | 882.4952        | 441.7513         | Q    | <b>596.3515</b>  | 298.6794        | 579.3249       | 290.1661         |                |                  | 5  |
| 9  | 997.5586         | 499.2829        | 980.5320         | 490.7696         | 979.5480        | 490.2776         | P    | <b>468.2929</b>  | 234.6501        | 451.2663       | 226.1368         |                |                  | 4  |
| 10 | <b>1096.6270</b> | 548.8171        | 1079.6004        | 540.3039         | 1078.6164       | 539.8118         | V    | 371.2401         | 186.1237        | 354.2136       | 177.6104         |                |                  | 3  |
| 11 | <b>1193.6797</b> | 597.3435        | <b>1176.6532</b> | 588.8302         | 1175.6692       | 588.3382         | P    | <b>272.1717</b>  | 136.5895        | 255.1452       | 128.0762         |                |                  | 2  |
| 12 |                  |                 |                  |                  |                 |                  | R    | 175.1190         | 88.0631         | 158.0924       | 79.5498          |                |                  | 1  |

Found in **P98175**, RNA-binding protein 10 OS=Homo sapiens GN=RBM10 PE=1 SV=3

Match to Query 9778: 1697.994488 from(850.004520,2+) intensity(87675.4375)

Title: File2076 Spectrum9627 scans: 10873

Data file I:\2013-12-05-SIMM7721-FR14-ZW.mgf

Click mouse within plot area to zoom in by factor of two about that point

Or,   to  Da Label all possible matches  Label matches used for scoring 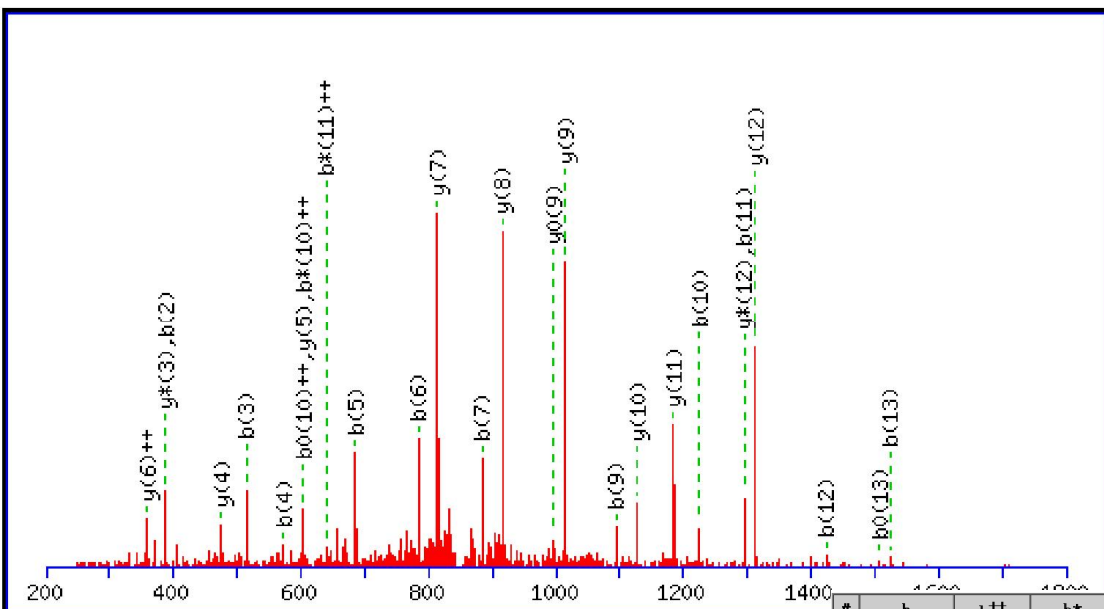

Monoisotopic mass of neutral peptide Mr(calc): 1697.9

Fixed modifications: Carbamidomethyl (C) (apply to specific)

Variable modifications:

K1 : Propionyl (K)

K2 : Propionyl-(13CD3)Methyl (K)

Ions Score: 72 Expect: 1.9e-005

Matches : 27/142 fragment ions using 40 most intense peaks

| #  | b                | b <sup>++</sup> | b*        | b <sup>++</sup> * | b <sup>0</sup>   | b <sup>0++</sup> | Seq. | y                | y <sup>++</sup> | y*               | y <sup>++</sup> * | y <sup>0</sup>  | y <sup>0++</sup> | #  |
|----|------------------|-----------------|-----------|-------------------|------------------|------------------|------|------------------|-----------------|------------------|-------------------|-----------------|------------------|----|
| 1  | 185.1285         | 93.0679         | 168.1019  | 84.5546           |                  |                  | K    |                  |                 |                  |                   |                 |                  | 14 |
| 2  | <b>387.2875</b>  | 194.1474        | 370.2609  | 185.6341          |                  |                  | K    | 1514.8810        | 757.9441        | 1497.8544        | 749.4308          | 1496.8704       | 748.9388         | 13 |
| 3  | <b>515.3460</b>  | 258.1767        | 498.3195  | 249.6634          |                  |                  | Q    | <b>1312.7219</b> | 656.8646        | <b>1295.6954</b> | 648.3513          | 1294.7114       | 647.8593         | 12 |
| 4  | <b>572.3675</b>  | 286.6874        | 555.3410  | 278.1741          |                  |                  | G    | <b>1184.6634</b> | 592.8353        | 1167.6368        | 584.3220          | 1166.6528       | 583.8300         | 11 |
| 5  | <b>685.4516</b>  | 343.2294        | 668.4250  | 334.7162          |                  |                  | I    | <b>1127.6419</b> | 564.3246        | 1110.6154        | 555.8113          | 1109.6313       | 555.3193         | 10 |
| 6  | <b>784.5200</b>  | 392.7636        | 767.4934  | 384.2504          |                  |                  | V    | <b>1014.5578</b> | 507.7826        | 997.5313         | 499.2693          | <b>996.5473</b> | 498.7773         | 9  |
| 7  | <b>885.5677</b>  | 443.2875        | 868.5411  | 434.7742          | 867.5571         | 434.2822         | T    | <b>915.4894</b>  | 458.2483        | 898.4629         | 449.7351          | 897.4789        | 449.2431         | 8  |
| 8  | 982.6204         | 491.8139        | 965.5939  | 483.3006          | 964.6099         | 482.8086         | P    | <b>814.4417</b>  | 407.7245        | 797.4152         | 399.2112          | 796.4312        | 398.7192         | 7  |
| 9  | <b>1095.7045</b> | 548.3559        | 1078.6779 | 539.8426          | 1077.6939        | 539.3506         | I    | 717.3890         | <b>359.1981</b> | 700.3624         | 350.6849          | 699.3784        | 350.1928         | 6  |
| 10 | <b>1224.7477</b> | 612.8772        | 1207.7205 | <b>604.3639</b>   | 1206.7365        | <b>603.8719</b>  | E    | <b>604.3049</b>  | 302.6561        | 587.2784         | 294.1428          | 586.2944        | 293.6508         | 5  |
| 11 | <b>1295.7842</b> | 648.3957        | 1278.7577 | <b>639.8825</b>   | 1277.7736        | 639.3905         | A    | <b>475.2623</b>  | 238.1348        | 458.2358         | 229.6215          | 457.2518        | 229.1295         | 4  |
| 12 | <b>1423.8428</b> | 712.4250        | 1406.8162 | 703.9118          | 1405.8322        | 703.4197         | Q    | 404.2252         | 202.6162        | <b>387.1987</b>  | 194.1030          | 386.2146        | 193.6110         | 3  |
| 13 | <b>1524.8905</b> | 762.9489        | 1507.8639 | 754.4356          | <b>1506.8799</b> | 753.9436         | T    | 276.1666         | 138.5870        | 259.1401         | 130.0737          | 258.1561        | 129.5817         | 2  |
| 14 |                  |                 |           |                   |                  |                  | R    | 175.1190         | 88.0631         | 158.0924         | 79.5498           |                 |                  | 1  |

Match to Query 20193: 2766.605862 from(923.209230,3+) intensity(212850.0469)  
 Title: File2044 Spectrum21338 scans: 22878  
 Data file I:\2013-12-03-SIMM7721-FR8-ZW.mgf

Click mouse within plot area to zoom in by factor of two about that point  
 Or,  to  Da   
 Label all possible matches  Label matches used for scoring

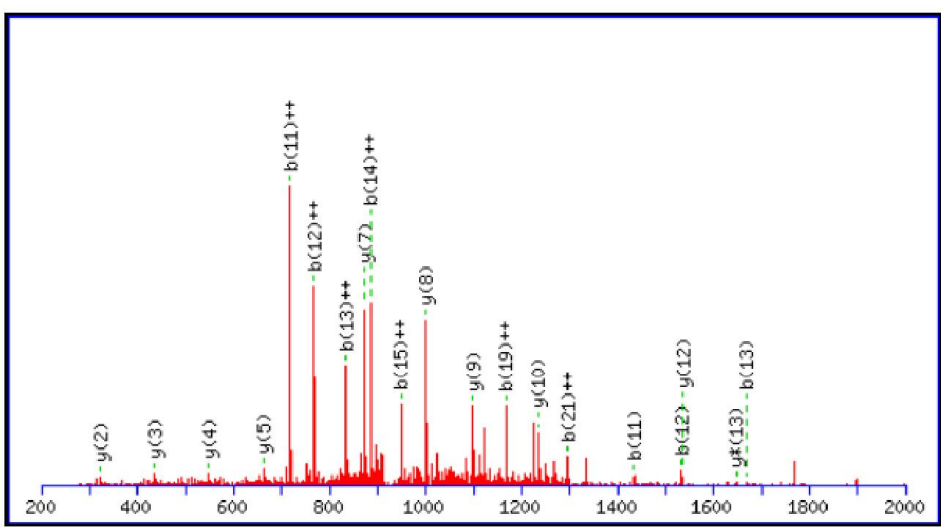

Monoisotopic mass of neutral peptide Mr(calc): 2766.6033  
 Fixed modifications: Carbamidomethyl (C) (apply to specified residues or termini only)  
 Variable modifications:  
 N-term : Acetyl (Protein N-term)  
 K8 : Propionyl-(13CD3)Methyl (K)  
 K11 : Propionyl-(13CD3)Methyl (K)  
 M13 : Label:13C(1)2H(3) (M)  
 Ions Score: 48 Expect: 0.002  
 Matches : 20/164 fragment ions using 35 most intense peaks ([help](#))

| #  | b         | b <sup>++</sup> | b*        | b <sup>+++</sup> | Seq. | y         | y <sup>++</sup> | y*        | y <sup>+++</sup> | #  |
|----|-----------|-----------------|-----------|------------------|------|-----------|-----------------|-----------|------------------|----|
| 1  | 114.0550  | 57.5311         |           |                  | A    |           |                 |           |                  | 22 |
| 2  | 277.1183  | 139.0628        |           |                  | Y    | 2654.5629 | 1327.7851       | 2637.5363 | 1319.2718        | 21 |
| 3  | 433.2194  | 217.1133        | 416.1928  | 208.6001         | R    | 2491.4995 | 1246.2534       | 2474.4730 | 1237.7401        | 20 |
| 4  | 490.2409  | 245.6241        | 473.2143  | 237.1108         | G    | 2335.3984 | 1168.2029       | 2318.3719 | 1159.6896        | 19 |
| 5  | 618.2994  | 309.6534        | 601.2729  | 301.1401         | Q    | 2278.3770 | 1139.6921       | 2261.3504 | 1131.1788        | 18 |
| 6  | 675.3209  | 338.1641        | 658.2944  | 329.6508         | G    | 2150.3184 | 1075.6628       | 2133.2918 | 1067.1496        | 17 |
| 7  | 803.3795  | 402.1934        | 786.3529  | 393.6801         | Q    | 2093.2969 | 1047.1521       | 2076.2704 | 1038.6388        | 16 |
| 8  | 1005.5385 | 503.2729        | 988.5119  | 494.7596         | K    | 1965.2383 | 983.1228        | 1948.2118 | 974.6095         | 15 |
| 9  | 1104.6069 | 552.8071        | 1087.5804 | 544.2938         | V    | 1763.0793 | 882.0433        | 1746.0528 | 873.5300         | 14 |
| 10 | 1232.6655 | 616.8364        | 1215.6389 | 608.3231         | Q    | 1664.0109 | 832.5091        | 1646.9844 | 823.9958         | 13 |
| 11 | 1434.8245 | 717.9159        | 1417.7979 | 709.4026         | K    | 1535.9523 | 768.4798        | 1518.9258 | 759.9665         | 12 |
| 12 | 1533.8929 | 767.4501        | 1516.8664 | 758.9368         | V    | 1333.7933 | 667.4003        | 1316.7668 | 658.8870         | 11 |
| 13 | 1668.9556 | 834.9814        | 1651.9290 | 826.4682         | M    | 1234.7249 | 617.8661        | 1217.6984 | 609.3528         | 10 |
| 14 | 1768.0240 | 884.5156        | 1750.9974 | 876.0024         | V    | 1099.6622 | 550.3348        | 1082.6357 | 541.8215         | 9  |
| 15 | 1896.0826 | 948.5449        | 1879.0560 | 940.0317         | Q    | 1000.5938 | 500.8006        | 983.5673  | 492.2873         | 8  |
| 16 | 1993.1353 | 997.0713        | 1976.1088 | 988.5580         | P    | 872.5352  | 436.7713        | 855.5087  | 428.2580         | 7  |
| 17 | 2106.2194 | 1053.6133       | 2089.1929 | 1045.1001        | I    | 775.4825  | 388.2449        | 758.4559  | 379.7316         | 6  |
| 18 | 2220.2623 | 1110.6348       | 2203.2358 | 1102.1215        | N    | 662.3984  | 331.7028        | 645.3719  | 323.1896         | 5  |
| 19 | 2333.3464 | 1167.1768       | 2316.3198 | 1158.6636        | L    | 548.3555  | 274.6814        | 531.3289  | 266.1681         | 4  |
| 20 | 2446.4305 | 1223.7189       | 2429.4039 | 1215.2056        | I    | 435.2714  | 218.1394        | 418.2449  | 209.6261         | 3  |
| 21 | 2593.4989 | 1297.2531       | 2576.4723 | 1288.7398        | F    | 322.1874  | 161.5973        | 305.1608  | 153.0840         | 2  |
| 22 |           |                 |           |                  | R    | 175.1190  | 88.0631         | 158.0924  | 79.5498          | 1  |



Match to Query 11964: 1698.937632 from(567.319820,3+) intensity(257532.1250)

Title: File2044 Spectrum9248 scans: 10276

Data file I:\2013-12-03-SIMM7721-FR8-ZW.mgf

Click mouse within plot area to zoom in by factor of two about that point

Or,   to  Da Label all possible matches  Label matches used for scoring 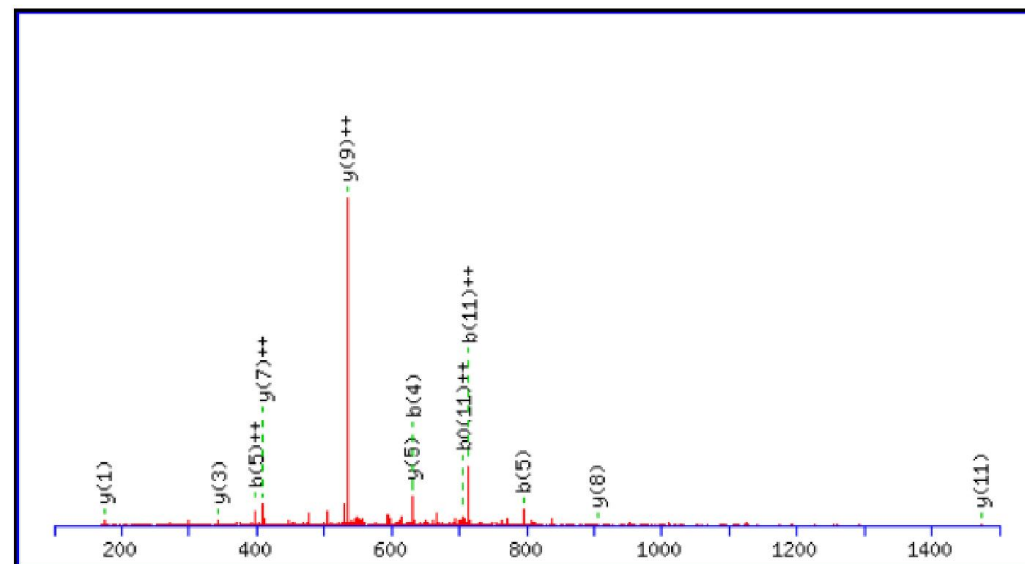

Monoisotopic mass of neutral peptide Mr(calc): 1698.9486

Fixed modifications: Carbamidomethyl (C) (apply to specified)

Variable modifications:

K3 : Propionyl-(13CD3)Methyl (K)

K4 : Propionyl-(13CD3)Methyl (K)

Ions Score: 21 Expect: 4.7

Matches : 12/128 fragment ions using 25 most intense peaks

| #  | b               | b <sup>++</sup> | b*        | b <sup>+++</sup> | b <sup>0</sup> | b <sup>0++</sup> | Seq. | y                | y <sup>++</sup> | y*        | y <sup>+++</sup> | y <sup>0</sup> | y <sup>0++</sup> | #  |
|----|-----------------|-----------------|-----------|------------------|----------------|------------------|------|------------------|-----------------|-----------|------------------|----------------|------------------|----|
| 1  | 115.0502        | 58.0287         | 98.0237   | 49.5155          |                |                  | N    |                  |                 |           |                  |                |                  | 13 |
| 2  | 228.1343        | 114.5708        | 211.1077  | 106.0575         |                |                  | I    | 1585.9130        | 793.4601        | 1568.8864 | 784.9469         | 1567.9024      | 784.4548         | 12 |
| 3  | 430.2933        | 215.6503        | 413.2667  | 207.1370         |                |                  | K    | <b>1472.8289</b> | 736.9181        | 1455.8024 | 728.4048         | 1454.8183      | 727.9128         | 11 |
| 4  | <b>632.4523</b> | 316.7298        | 615.4257  | 308.2165         |                |                  | K    | 1270.6699        | 635.8386        | 1253.6434 | 627.3253         | 1252.6593      | 626.8333         | 10 |
| 5  | <b>795.5156</b> | <b>398.2614</b> | 778.4891  | 389.7482         |                |                  | Y    | 1068.5109        | <b>534.7591</b> | 1051.4843 | 526.2458         | 1050.5003      | 525.7538         | 9  |
| 6  | 882.5477        | 441.7775        | 865.5211  | 433.2642         | 864.5371       | 432.7722         | S    | <b>905.4476</b>  | 453.2274        | 888.4210  | 444.7141         | 887.4370       | 444.2221         | 8  |
| 7  | 983.5953        | 492.3013        | 966.5688  | 483.7880         | 965.5848       | 483.2960         | T    | 818.4155         | <b>409.7114</b> | 801.3890  | 401.1981         | 800.4050       | 400.7061         | 7  |
| 8  | 1070.6274       | 535.8173        | 1053.6008 | 527.3040         | 1052.6168      | 526.8120         | S    | 717.3678         | 359.1876        | 700.3413  | 350.6743         | 699.3573       | 350.1823         | 6  |
| 9  | 1256.7067       | 628.8570        | 1239.6801 | 620.3437         | 1238.6961      | 619.8517         | W    | <b>630.3358</b>  | 315.6715        | 613.3093  | 307.1583         | 612.3253       | 306.6663         | 5  |
| 10 | 1357.7543       | 679.3808        | 1340.7278 | 670.8675         | 1339.7438      | 670.3755         | T    | 444.2565         | 222.6319        | 427.2300  | 214.1186         | 426.2459       | 213.6266         | 4  |
| 11 | 1428.7915       | <b>714.8994</b> | 1411.7649 | 706.3861         | 1410.7809      | <b>705.8941</b>  | A    | <b>343.2088</b>  | 172.1081        | 326.1823  | 163.5948         |                |                  | 3  |
| 12 | 1525.8442       | 763.4258        | 1508.8177 | 754.9125         | 1507.8337      | 754.4205         | P    | 272.1717         | 136.5895        | 255.1452  | 128.0762         |                |                  | 2  |
| 13 |                 |                 |           |                  |                |                  | R    | <b>175.1190</b>  | 88.0631         | 158.0924  | 79.5498          |                |                  | 1  |

Found in **O43361**, Zinc finger protein 749 OS=Homo sapiens GN=ZNF749 PE=1 SV=2

Match to Query 13490: 1823.930388 from(912.972470,2+) intensity(331487.7500)

Title: File2044 Spectrum15015 scans: 16283

Data file I:\2013-12-03-SIMM7721-FR8-ZW.mgf

Click mouse within plot area to zoom in by factor of two about that point

Or,   to  Da Label all possible matches  Label matches used for scoring 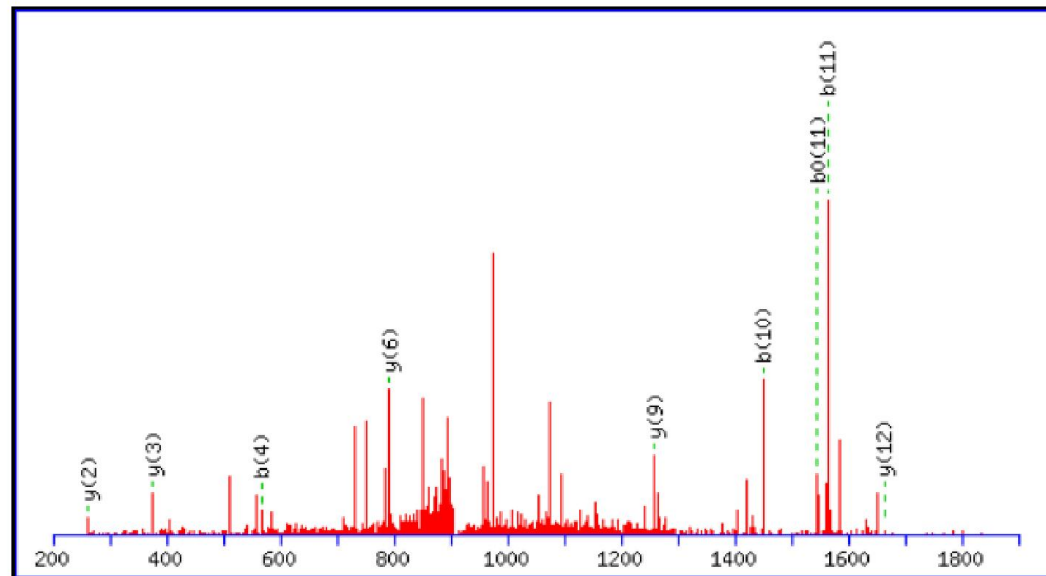

Monoisotopic mass of neutral peptide Mr(calcd): 1823.9196

Fixed modifications: Carbamidomethyl (C) (apply to specific)

Variable modifications:

K3 : Propionyl-(13CD3)Methyl (K)

Ions Score: 24 Expect: 2.4

Matches : 9/120 fragment ions using 16 most intense peaks

| #  | b         | b <sup>++</sup> | b <sup>*</sup> | b <sup>***</sup> | b <sup>0</sup> | b <sup>0++</sup> | Seq. | y         | y <sup>++</sup> | y <sup>*</sup> | y <sup>***</sup> | y <sup>0</sup> | y <sup>0++</sup> | #  |
|----|-----------|-----------------|----------------|------------------|----------------|------------------|------|-----------|-----------------|----------------|------------------|----------------|------------------|----|
| 1  | 161.0379  | 81.0226         |                |                  |                |                  | C    |           |                 |                |                  |                |                  | 13 |
| 2  | 218.0594  | 109.5333        |                |                  |                |                  | G    | 1664.8962 | 832.9518        | 1647.8697      | 824.4385         | 1646.8857      | 823.9465         | 12 |
| 3  | 420.2184  | 210.6128        | 403.1919       | 202.0996         |                |                  | K    | 1607.8748 | 804.4410        | 1590.8482      | 795.9277         | 1589.8642      | 795.4357         | 11 |
| 4  | 567.2868  | 284.1470        | 550.2603       | 275.6338         |                |                  | F    | 1405.7158 | 703.3615        | 1388.6892      | 694.8482         | 1387.7052      | 694.3562         | 10 |
| 5  | 714.3552  | 357.6813        | 697.3287       | 349.1680         |                |                  | F    | 1258.6473 | 629.8273        | 1241.6208      | 621.3140         | 1240.6368      | 620.8220         | 9  |
| 6  | 870.4563  | 435.7318        | 853.4298       | 427.2185         |                |                  | R    | 1111.5789 | 556.2931        | 1094.5524      | 547.7798         | 1093.5684      | 547.2878         | 8  |
| 7  | 1033.5197 | 517.2635        | 1016.4931      | 508.7502         |                |                  | Y    | 955.4778  | 478.2425        | 938.4513       | 469.7293         | 937.4672       | 469.2373         | 7  |
| 8  | 1189.6208 | 595.3140        | 1172.5942      | 586.8008         |                |                  | R    | 792.4145  | 396.7109        | 775.3879       | 388.1976         | 774.4039       | 387.7056         | 6  |
| 9  | 1349.6514 | 675.3294        | 1332.6249      | 666.8161         |                |                  | C    | 636.3134  | 318.6603        | 619.2868       | 310.1470         | 618.3028       | 309.6550         | 5  |
| 10 | 1450.6991 | 725.8532        | 1433.6726      | 717.3399         | 1432.6885      | 716.8479         | T    | 476.2827  | 238.6450        | 459.2562       | 230.1317         | 458.2722       | 229.6397         | 4  |
| 11 | 1563.7832 | 782.3952        | 1546.7566      | 773.8820         | 1545.7726      | 773.3899         | L    | 375.2350  | 188.1212        | 358.2085       | 179.6079         | 357.2245       | 179.1159         | 3  |
| 12 | 1650.8152 | 825.9112        | 1633.7887      | 817.3980         | 1632.8046      | 816.9060         | S    | 262.1510  | 131.5791        | 245.1244       | 123.0659         | 244.1404       | 122.5738         | 2  |
| 13 |           |                 |                |                  |                |                  | R    | 175.1190  | 88.0631         | 158.0924       | 79.5498          |                |                  | 1  |

Found in **H0Y470**, Girdin (Fragment) OS=Homo sapiens GN=CCDC88A PE=2 SV=1

Match to Query 9398: 1549.802468 from(775.908510,2+) intensity(32161.2949)

Title: File2044 Spectrum10218 scans: 11286

Data file I:\2013-12-03-SIMM7721-FR8-ZW.mgf

Click mouse within plot area to zoom in by factor of two about that point

Or,   to  Da Label all possible matches  Label matches used for scoring 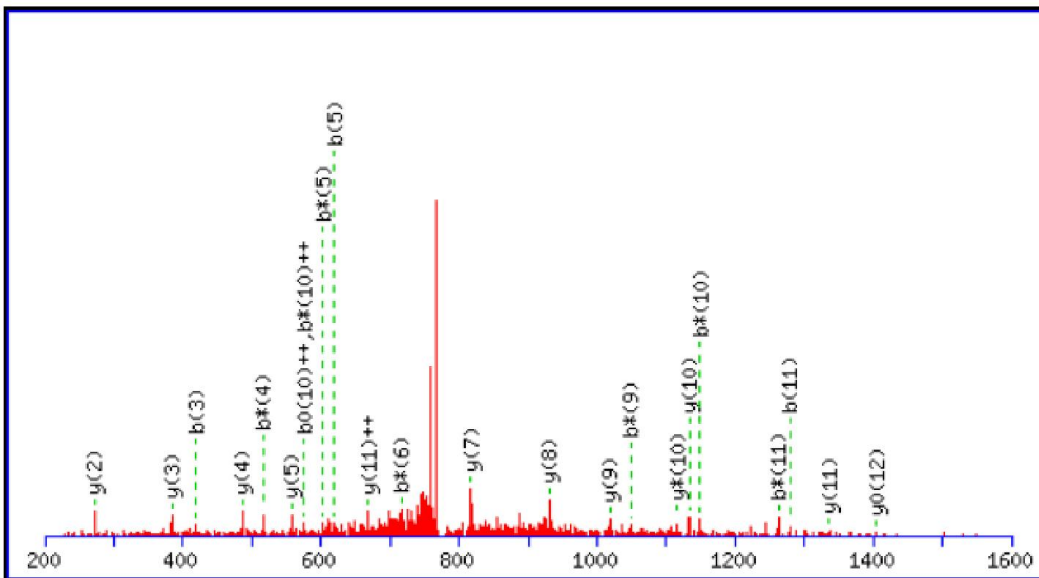

Monoisotopic mass of neutral peptide Mr(calc): 1549.8009

Fixed modifications: Carbamidomethyl (C) (apply to specified)

Variable modifications:

K3 : Propionyl-(13CD3)Methyl (K)

Ions Score: 38 Expect: 0.079

Matches : 23/136 fragment ions using 65 most intense peaks

| #  | b                | b <sup>++</sup> | b*               | b <sup>*++</sup> | b <sup>0</sup> | b <sup>0++</sup> | Seq. | y                | y <sup>++</sup> | y*               | y <sup>*++</sup> | y <sup>0</sup> | y <sup>0++</sup> | #  |
|----|------------------|-----------------|------------------|------------------|----------------|------------------|------|------------------|-----------------|------------------|------------------|----------------|------------------|----|
| 1  | 129.0659         | 65.0366         | 112.0393         | 56.5233          |                |                  | Q    |                  |                 |                  |                  |                |                  | 13 |
| 2  | 216.0979         | 108.5526        | 199.0713         | 100.0393         | 198.0873       | 99.5473          | S    | 1422.7496        | 711.8784        | 1405.7231        | 703.3652         | 1404.7390      | 702.8732         | 12 |
| 3  | <b>418.2569</b>  | 209.6321        | 401.2303         | 201.1188         | 400.2463       | 200.6268         | K    | <b>1335.7176</b> | <b>668.3624</b> | 1318.6910        | 659.8492         | 1317.7070      | 659.3571         | 11 |
| 4  | 533.2838         | 267.1456        | <b>516.2573</b>  | 258.6323         | 515.2733       | 258.1403         | D    | <b>1133.5586</b> | 567.2829        | <b>1116.5320</b> | 558.7696         | 1115.5480      | 558.2776         | 10 |
| 5  | <b>620.3159</b>  | 310.6616        | <b>603.2893</b>  | 302.1483         | 602.3053       | 301.6563         | S    | <b>1018.5316</b> | 509.7694        | 1001.5051        | 501.2562         | 1000.5211      | 500.7642         | 9  |
| 6  | 734.3588         | 367.6830        | <b>717.3322</b>  | 359.1698         | 716.3482       | 358.6778         | N    | <b>931.4996</b>  | 466.2534        | 914.4730         | 457.7402         | 913.4890       | 457.2482         | 8  |
| 7  | 831.4116         | 416.2094        | 814.3850         | 407.6961         | 813.4010       | 407.2041         | P    | <b>817.4567</b>  | 409.2320        | 800.4301         | 400.7187         | 799.4461       | 400.2267         | 7  |
| 8  | 994.4749         | 497.7411        | 977.4483         | 489.2278         | 976.4643       | 488.7358         | Y    | 720.4039         | 360.7056        | 703.3774         | 352.1923         | 702.3933       | 351.7003         | 6  |
| 9  | 1065.5120        | 533.2596        | <b>1048.4855</b> | 524.7464         | 1047.5014      | 524.2544         | A    | <b>557.3406</b>  | 279.1739        | 540.3140         | 270.6606         | 539.3300       | 270.1686         | 5  |
| 10 | 1166.5597        | 583.7835        | <b>1149.5331</b> | <b>575.2702</b>  | 1148.5491      | <b>574.7782</b>  | T    | <b>486.3035</b>  | 243.6554        | 469.2769         | 235.1421         | 468.2929       | 234.6501         | 4  |
| 11 | <b>1279.6437</b> | 640.3255        | <b>1262.6172</b> | 631.8122         | 1261.6332      | 631.3202         | L    | <b>385.2558</b>  | 193.1315        | 368.2292         | 184.6183         |                |                  | 3  |
| 12 | 1376.6965        | 688.8519        | 1359.6700        | 680.3386         | 1358.6859      | 679.8466         | P    | <b>272.1717</b>  | 136.5895        | 255.1452         | 128.0762         |                |                  | 2  |
| 13 |                  |                 |                  |                  |                |                  | R    | 175.1190         | 88.0631         | 158.0924         | 79.5498          |                |                  | 1  |

Match to Query 4382: 1117.636928 from(559.825740, 2+) intensity(100443.3750)

Title: File2041 Spectrum8170 scans: 9357

Data file I:\2013-12-03-SIMM7721-FR9-ZW.mgf

Click mouse within plot area to zoom in by factor of two about that point

Or,   to  Da Label all possible matches  Label matches used for scoring 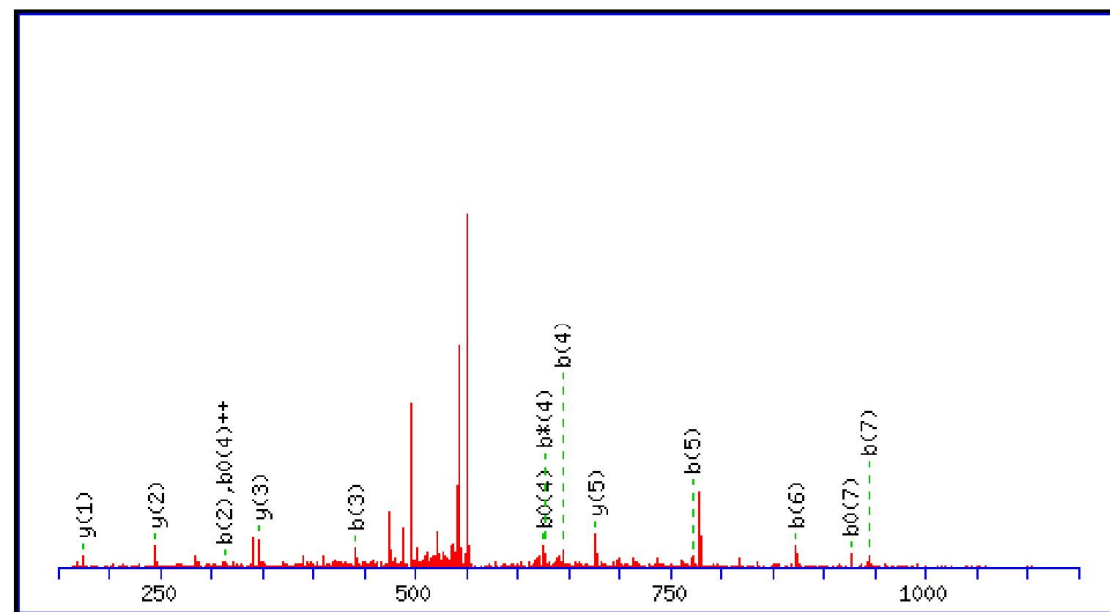Monoisotopic mass of neutral peptide  $M_r(\text{calc})$ : 1117.6364

Fixed modifications: Carbamidomethyl (C) (apply to spec:

Variable modifications:

K1 : Propionyl (K)

K4 : Propionyl-(13CD3)Methyl (K)

Ions Score: 24 Expect: 1.4

Matches : 14/76 fragment ions using 39 most intense peaks

| # | b               | b <sup>++</sup> | b <sup>+</sup>  | b <sup>+++</sup> | b <sup>0</sup>  | b <sup>0++</sup> | Seq. | y               | y <sup>++</sup> | y <sup>+</sup> | y <sup>+++</sup> | y <sup>0</sup> | y <sup>0++</sup> | # |
|---|-----------------|-----------------|-----------------|------------------|-----------------|------------------|------|-----------------|-----------------|----------------|------------------|----------------|------------------|---|
| 1 | 185.1285        | 93.0679         | 168.1019        | 84.5546          |                 |                  | K    |                 |                 |                |                  |                |                  | 8 |
| 2 | <b>313.1870</b> | 157.0972        | 296.1605        | 148.5839         |                 |                  | Q    | 934.5225        | 467.7649        | 917.4960       | 459.2516         | 916.5119       | 458.7596         | 7 |
| 3 | <b>442.2296</b> | 221.6185        | 425.2031        | 213.1052         | 424.2191        | 212.6132         | E    | 806.4639        | 403.7356        | 789.4374       | 395.2223         | 788.4534       | 394.7303         | 6 |
| 4 | <b>644.3886</b> | 322.6980        | <b>627.3621</b> | 314.1847         | <b>626.3781</b> | <b>313.6927</b>  | K    | <b>677.4213</b> | 339.2143        | 660.3948       | 330.7010         | 659.4108       | 330.2090         | 5 |
| 5 | <b>772.4472</b> | 386.7272        | 755.4207        | 378.2140         | 754.4367        | 377.7220         | Q    | 475.2623        | 238.1348        | 458.2358       | 229.6215         | 457.2518       | 229.1295         | 4 |
| 6 | <b>873.4949</b> | 437.2511        | 856.4683        | 428.7378         | 855.4843        | 428.2458         | T    | <b>347.2037</b> | 174.1055        | 330.1772       | 165.5922         | 329.1932       | 165.1002         | 3 |
| 7 | <b>944.5320</b> | 472.7696        | 927.5055        | 464.2564         | <b>926.5214</b> | 463.7644         | A    | <b>246.1561</b> | 123.5817        | 229.1295       | 115.0684         |                |                  | 2 |
| 8 |                 |                 |                 |                  |                 |                  | R    | <b>175.1190</b> | 88.0631         | 158.0924       | 79.5498          |                |                  | 1 |

Match to Query 3909: 1086.630468 from(544.322510,2+) intensity(1937397.2500)

Title: File2041 Spectrum7088 scans: 8230

Data file I:\2013-12-03-SIMM7721-FR9-ZW.mgf

Click mouse within plot area to zoom in by factor of two about that point

Or,   to  Da Label all possible matches  Label matches used for scoring 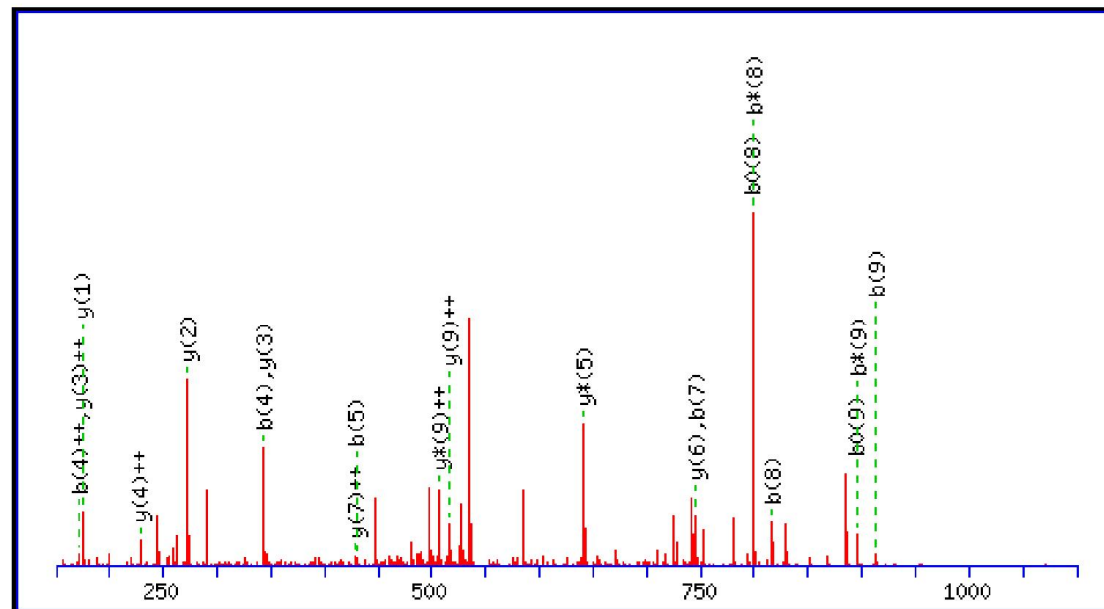**Monoisotopic mass of neutral peptide Mr(calc):** 1086.6306**Fixed modifications:** Carbamidomethyl (C) (apply to specified residues or termini only)**Variable modifications:****K6** : Propionyl-(13CD3)Methyl (K)**Ions Score:** 30 **Expect:** 0.32**Matches** : 20/84 fragment ions using 41 most intense peaks

| #  | b        | b <sup>++</sup> | b <sup>+</sup> | b <sup>+++</sup> | b <sup>0</sup> | b <sup>0++</sup> | Seq. | y         | y <sup>++</sup> | y <sup>+</sup> | y <sup>+++</sup> | y <sup>0</sup> | y <sup>0++</sup> | #  |
|----|----------|-----------------|----------------|------------------|----------------|------------------|------|-----------|-----------------|----------------|------------------|----------------|------------------|----|
| 1  | 58.0287  | 29.5180         |                |                  |                |                  | G    |           |                 |                |                  |                |                  | 10 |
| 2  | 115.0502 | 58.0287         |                |                  |                |                  | G    | 1030.6164 | 515.8118        | 1013.5899      | 507.2986         | 1012.6058      | 506.8066         | 9  |
| 3  | 230.0771 | 115.5422        |                |                  | 212.0666       | 106.5369         | D    | 973.5949  | 487.3011        | 956.5634       | 478.7878         | 955.5844       | 478.2958         | 8  |
| 4  | 343.1612 | 172.0842        |                |                  | 325.1506       | 163.0790         | I    | 858.5680  | 429.7876        | 841.5414       | 421.2744         | 840.5574       | 420.7824         | 7  |
| 5  | 430.1932 | 215.6003        |                |                  | 412.1827       | 206.5950         | S    | 745.4839  | 373.2456        | 728.4574       | 364.7323         | 727.4734       | 364.2403         | 6  |
| 6  | 632.3523 | 316.6798        | 615.3257       | 308.1665         | 614.3417       | 307.6745         | K    | 658.4519  | 329.7296        | 641.4254       | 321.2163         |                |                  | 5  |
| 7  | 745.4363 | 373.2218        | 728.4098       | 364.7085         | 727.4258       | 364.2165         | I    | 456.2929  | 228.6501        | 439.2663       | 220.1368         |                |                  | 4  |
| 8  | 816.4734 | 408.7404        | 799.4469       | 400.2271         | 798.4629       | 399.7351         | A    | 343.2088  | 172.1081        | 326.1823       | 163.5948         |                |                  | 3  |
| 9  | 913.5263 | 457.2667        | 896.4996       | 448.7535         | 895.5156       | 448.2615         | P    | 272.1717  | 136.5895        | 255.1452       | 128.0762         |                |                  | 2  |
| 10 |          |                 |                |                  |                |                  | R    | 175.1190  | 88.0631         | 158.0924       | 79.5498          |                |                  | 1  |

MS/MS Fragmentation of **KGPAPQLQGVVALPEELEDPMANTQKYEHHVR**

Found in **HOYEX5**, Splicing factor 3B subunit 2 (Fragment) OS=Homo sapiens GN=SF3B2 PE=4 SV=1

Match to Query 23420: 4058.043896 from(1015.518250,4+) intensity(0.0000)

Title: File2041 Spectrum17436 scans: 19010

Data file I:\2013-12-03-SIMM7721-FR9-ZW.mgf

Click mouse within plot area to zoom in by factor of two about that point

Or,   to  Da

Label all possible matches  Label matches used for scoring

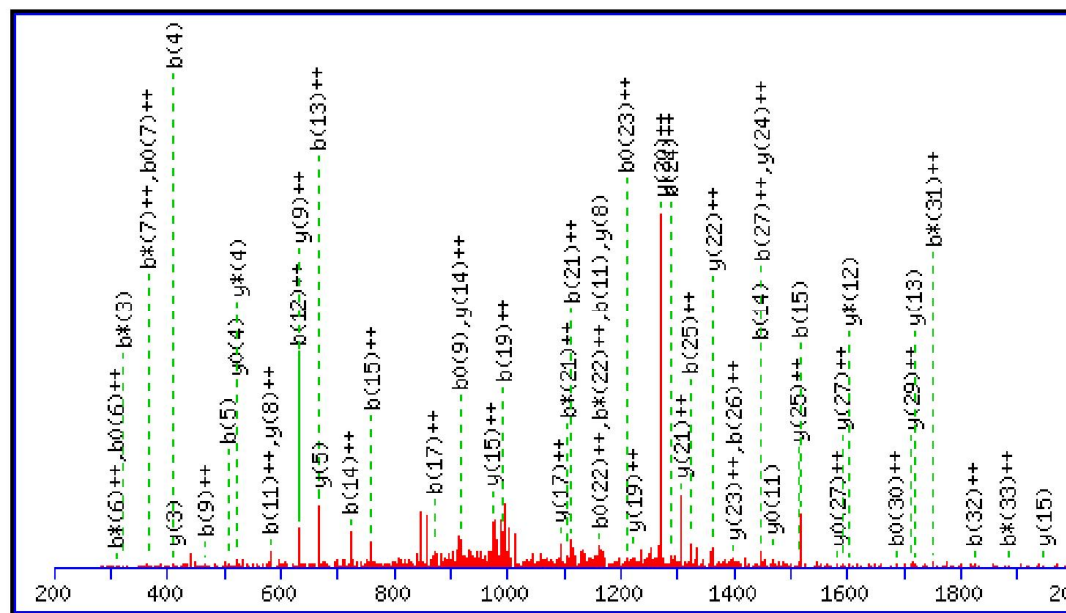

| #  | b                | b <sup>+</sup>   | b <sup>*</sup> | b <sup>+</sup> | b <sup>0</sup> | b <sup>0+</sup> | Seq.     | y                | y <sup>+</sup> | y <sup>*</sup> | y <sup>+</sup> | y <sup>0</sup> | y <sup>0+</sup> | #  |
|----|------------------|------------------|----------------|----------------|----------------|-----------------|----------|------------------|----------------|----------------|----------------|----------------|-----------------|----|
| 1  | 185.1285         | 93.0679          | 168.1019       | 84.5546        |                |                 | <b>K</b> |                  |                |                |                |                |                 | 35 |
| 2  | 242.1499         | 121.5796         | 225.1234       | 113.0653       |                |                 | <b>G</b> | 3874.9543        | 1937.9808      | 3857.9278      | 1929.4675      | 3856.9438      | 1928.9755       | 34 |
| 3  | 339.2027         | 170.1050         | 322.1761       | 161.5917       |                |                 | <b>P</b> | 3817.9329        | 1909.4701      | 3800.9063      | 1900.9568      | 3799.9223      | 1900.4648       | 33 |
| 4  | <b>410.2398</b>  | 205.6236         | 393.2132       | 197.1103       |                |                 | <b>A</b> | 3720.8801        | 1860.9437      | 3703.8536      | 1852.4304      | 3702.8695      | 1851.9384       | 32 |
| 5  | <b>507.2926</b>  | 254.1499         | 490.2660       | 245.6366       |                |                 | <b>P</b> | 3649.8430        | 1825.4251      | 3632.8164      | 1816.9119      | 3631.8324      | 1816.4198       | 31 |
| 6  | 636.3352         | 318.6712         | 619.3086       | 310.1579       | 618.3246       | 309.6659        | <b>B</b> | 3562.7902        | 1776.8987      | 3535.7637      | 1768.3855      | 3534.7797      | 1767.8935       | 30 |
| 7  | 749.4192         | 375.2132         | 732.3927       | 366.7000       | 731.4087       | 366.2080        | <b>L</b> | 3423.7476        | 1712.3775      | 3406.7211      | 1703.8642      | 3405.7371      | 1703.3722       | 29 |
| 8  | 877.4778         | 439.2425         | 860.4512       | 430.7293       | 859.4672       | 430.2373        | <b>Q</b> | 3310.6636        | 1655.8354      | 3293.6370      | 1647.3221      | 3292.6530      | 1646.8301       | 28 |
| 9  | 954.4993         | <b>467.7533</b>  | 917.4727       | 459.2400       | 916.4897       | 458.7480        | <b>G</b> | 3182.6050        | 1591.8061      | 3165.5794      | 1583.2929      | 3164.5944      | 1582.8008       | 27 |
| 10 | 1033.5677        | 517.2875         | 1016.5411      | 508.7742       | 1015.5571      | 508.2822        | <b>V</b> | 3125.5835        | 1563.2954      | 3108.5570      | 1554.7821      | 3107.5730      | 1554.2901       | 26 |
| 11 | <b>1162.6103</b> | <b>581.8088</b>  | 1145.5837      | 573.2955       | 1144.5997      | 572.8035        | <b>B</b> | 3026.5151        | 1513.7612      | 3009.4886      | 1505.2479      | 3008.5045      | 1504.7559       | 25 |
| 12 | 1261.6787        | <b>631.3430</b>  | 1244.6521      | 622.8297       | 1243.6681      | 622.3377        | <b>V</b> | 2897.4725        | 1449.2399      | 2880.4460      | 1440.7266      | 2879.4620      | 1440.2346       | 24 |
| 13 | 1332.7158        | <b>666.8615</b>  | 1315.6892      | 658.3483       | 1314.7052      | 657.8563        | <b>A</b> | 2798.4041        | 1399.7067      | 2781.3776      | 1391.1924      | 2780.3935      | 1390.7004       | 23 |
| 14 | <b>1445.7999</b> | <b>723.4036</b>  | 1428.7733      | 714.8903       | 1427.7893      | 714.3983        | <b>L</b> | 2727.3670        | 1364.1871      | 2710.3404      | 1355.6739      | 2709.3564      | 1355.1818       | 22 |
| 15 | <b>1516.8370</b> | <b>758.9221</b>  | 1499.8104      | 750.4083       | 1498.8264      | 749.9163        | <b>A</b> | 2614.2829        | 1307.6461      | 2597.2564      | 1299.1318      | 2596.2724      | 1298.6398       | 21 |
| 16 | 1613.8937        | 807.4485         | 1596.8632      | 798.3552       | 1595.8792      | 798.4432        | <b>P</b> | 2543.2458        | 1272.1265      | 2526.2193      | 1263.6193      | 2525.2352      | 1263.1213       | 20 |
| 17 | 1742.9323        | <b>871.9698</b>  | 1725.9058      | 863.4565       | 1724.9218      | 862.9645        | <b>B</b> | 2446.1930        | 1223.6002      | 2429.1665      | 1215.0869      | 2428.1825      | 1214.5949       | 19 |
| 18 | 1871.9749        | 936.4911         | 1854.9494      | 927.9778       | 1853.9644      | 927.4858        | <b>B</b> | 2317.1505        | 1159.0789      | 2300.1239      | 1150.5656      | 2299.1399      | 1150.0736       | 18 |
| 19 | 1985.0590        | <b>993.0331</b>  | 1968.0324      | 984.5199       | 1967.0484      | 984.0278        | <b>L</b> | 2188.1079        | 1094.5576      | 2171.0813      | 1086.0443      | 2170.0973      | 1085.5523       | 17 |
| 20 | 2114.1016        | 1057.5544        | 2097.0750      | 1049.0412      | 2096.0910      | 1048.5491       | <b>B</b> | 2075.0238        | 1038.0155      | 2057.9972      | 1029.5023      | 2057.0132      | 1029.0103       | 16 |
| 21 | 2227.1856        | <b>1114.0965</b> | 2210.1591      | 1105.5832      | 2209.1751      | 1105.0912       | <b>L</b> | <b>1945.9812</b> | 973.4942       | 1928.9547      | 964.9810       | 1927.9705      | 964.4890        | 15 |
| 22 | 2342.2126        | 1171.6099        | 2325.1860      | 1163.0967      | 2324.2020      | 1162.6046       | <b>B</b> | 1832.8971        | 916.9522       | 1815.8706      | 908.4389       | 1814.8866      | 907.9469        | 14 |
| 23 | 2459.2654        | 1220.1363        | 2442.2388      | 1211.6230      | 2441.2548      | 1211.1310       | <b>P</b> | <b>1717.8702</b> | 869.4387       | 1700.8436      | 860.9255       | 1699.8596      | 860.4335        | 13 |
| 24 | 2574.3280        | <b>1287.6676</b> | 2557.3015      | 1279.1544      | 2556.3175      | 1278.6624       | <b>B</b> | 1620.8174        | 810.9124       | 1603.7999      | 802.3991       | 1602.8069      | 801.9071        | 12 |
| 25 | 2645.9651        | <b>1323.1862</b> | 2628.3386      | 1314.6729      | 2627.3546      | 1314.1809       | <b>A</b> | 1485.7548        | 743.3810       | 1468.7282      | 734.8677       | 1467.7442      | 734.3757        | 11 |
| 26 | 2796.4227        | <b>1398.7150</b> | 2779.3962      | 1390.2017      | 2778.4122      | 1389.7097       | <b>B</b> | 1414.7176        | 707.8625       | 1397.6911      | 699.3492       | 1396.7071      | 698.8572        | 10 |
| 27 | 2897.4704        | <b>1449.2398</b> | 2880.4438      | 1440.7256      | 2879.4598      | 1440.2336       | <b>L</b> | 1263.6601        | 632.3397       | 1246.6395      | 623.8204       | 1245.6495      | 623.3284        | 9  |
| 28 | 3025.5290        | 1513.2681        | 3008.5024      | 1504.7549      | 3007.5184      | 1504.2628       | <b>Q</b> | <b>1162.6124</b> | 581.8088       | 1145.5858      | 573.2966       | 1144.6018      | 572.8045        | 8  |
| 29 | 3227.6880        | 1614.3476        | 3210.6614      | 1605.8344      | 3209.6774      | 1605.3423       | <b>K</b> | 1034.5538        | 517.7805       | 1017.5273      | 509.2673       | 1016.5432      | 508.7753        | 7  |
| 30 | 3390.7513        | 1695.8793        | 3373.7248      | 1687.3660      | 3372.7408      | 1686.8740       | <b>Y</b> | 832.3948         | 416.7010       | 815.3682       | 408.1873       | 814.3842       | 407.6958        | 6  |
| 31 | 3519.7939        | 1760.4006        | 3502.7674      | 1751.8873      | 3501.7833      | 1751.3953       | <b>B</b> | <b>669.3315</b>  | 325.1694       | 652.3049       | 326.6561       | 651.3209       | 326.1641        | 5  |
| 32 | 3648.8365        | <b>1824.9219</b> | 3631.8100      | 1816.4086      | 3630.8259      | 1815.9166       | <b>K</b> | 540.2889         | 270.6481       | 523.2623       | 262.1348       | 522.2783       | 261.6428        | 4  |
| 33 | 3785.8954        | 1893.4513        | 3768.8689      | 1884.9391      | 3767.8849      | 1884.4461       | <b>H</b> | <b>411.2463</b>  | 206.1268       | 394.2197       | 197.6135       |                |                 | 3  |
| 34 | 3884.9638        | 1942.9856        | 3867.9375      | 1934.4723      | 3866.9533      | 1933.9803       | <b>V</b> | 274.1874         | 137.5973       | 257.1608       | 129.0840       |                |                 | 2  |
| 35 |                  |                  |                |                |                |                 | <b>R</b> | 175.1190         | 88.0631        | 158.0924       | 79.5498        |                |                 | 1  |

**Monoisotopic mass of neutral peptide Mr(calc): 4058.0682**  
**Fixed modifications:** Carbamidomethyl (C) (apply to specified residues or  
**Variable modifications:**  
**K1** : Propionyl (K)  
**M24** : Label:13C(1)2H(3) (M)  
**M26** : Label:13C(1)2H(3)+Oxidation (M)  
**K29** : Propionyl-(13CD3)Methyl (K)  
**Ions Score:** 34 **Expect:** 0.35  
**Matches** : 56/392 fragment ions using 170 most intense peaks ([help](#))

MS/MS Fragmentation of **KALHPR**

Found in **Q9UIK4** Death-associated protein kinase 2 OS=Homo sapiens GN=DAPK2 PE=1 SV=1

Match to Query 6543: 794.502788 from(398.258670,2+) intensity(167018.5469)

Title: File1989 Spectrum7715 scans: 8549

Data file I:\2013-12-03-SIMM7721-FR13-ZW2.mgf

Click mouse within plot area to zoom in by factor of two about that point

Or,  to  Da

Label all possible matches  Label matches used for scoring

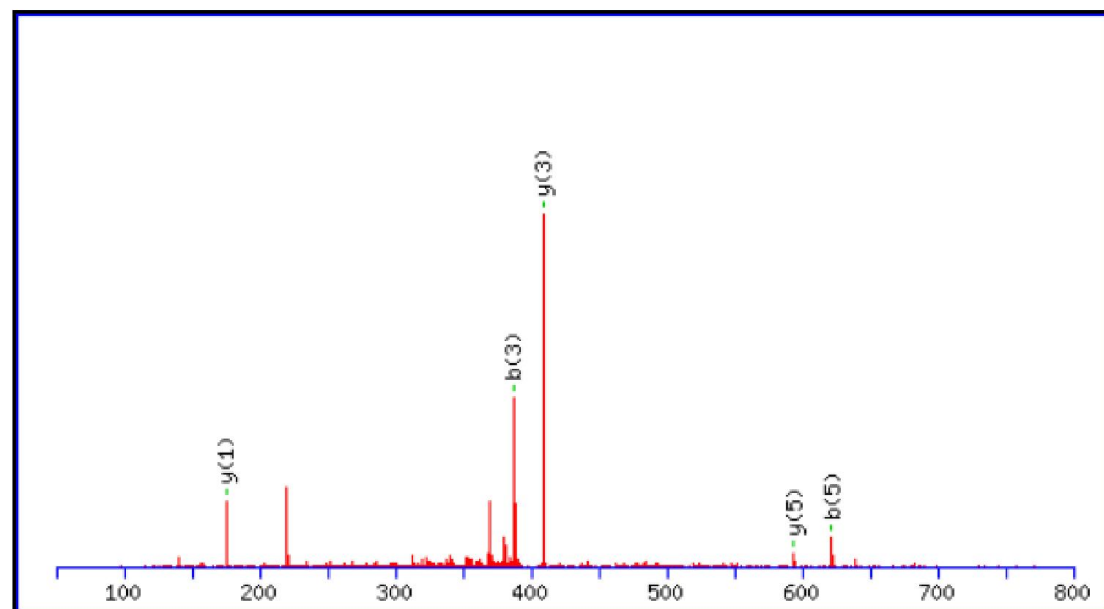

Monoisotopic mass of neutral peptide Mr(calc): 794.5035

Fixed modifications: Carbamidomethyl (C) (apply to speci

Variable modifications:

K1 : Propionyl-(13CD3)Methyl (K)

Ions Score: 21 Expect: 1

Matches : 5/40 fragment ions using 7 most intense peaks

| # | b               | b <sup>++</sup> | b <sup>*</sup> | b <sup>*++</sup> | Seq.     | y               | y <sup>++</sup> | y <sup>*</sup> | y <sup>*++</sup> | #        |
|---|-----------------|-----------------|----------------|------------------|----------|-----------------|-----------------|----------------|------------------|----------|
| 1 | 203.1665        | 102.0868        | 186.1397       | 93.5735          | <b>K</b> |                 |                 |                |                  | <b>6</b> |
| 2 | 274.2034        | 137.6053        | 257.1769       | 129.0921         | <b>A</b> | <b>593.3518</b> | 297.1795        | 576.3253       | 288.6663         | <b>5</b> |
| 3 | <b>387.2875</b> | 194.1474        | 370.2609       | 185.6341         | <b>L</b> | 522.3147        | 261.6610        | 505.2881       | 253.1477         | <b>4</b> |
| 4 | 524.3464        | 262.6768        | 507.3198       | 254.1636         | <b>H</b> | <b>409.2306</b> | 205.1190        | 392.2041       | 196.6057         | <b>3</b> |
| 5 | <b>621.3991</b> | 311.2032        | 604.3726       | 302.6899         | <b>P</b> | 272.1717        | 136.5895        | 255.1452       | 128.0762         | <b>2</b> |
| 6 |                 |                 |                |                  | <b>R</b> | <b>175.1190</b> | 88.0631         | 158.0924       | 79.5498          | <b>1</b> |

Found in **Q9UK61**, Protein FAM208A OS=Homo sapiens GN=FAM208A PE=1 SV=3

Match to Query 9354: 1054.603248 from(528.308900,2+) intensity(92075.4531)

Title: File1989 Spectrum9020 scans: 9941

Data file I:\2013-12-03-SIMM7721-FR13-ZW2.mgf

Click mouse within plot area to zoom in by factor of two about that point

Or,   to  Da Label all possible matches  Label matches used for scoring 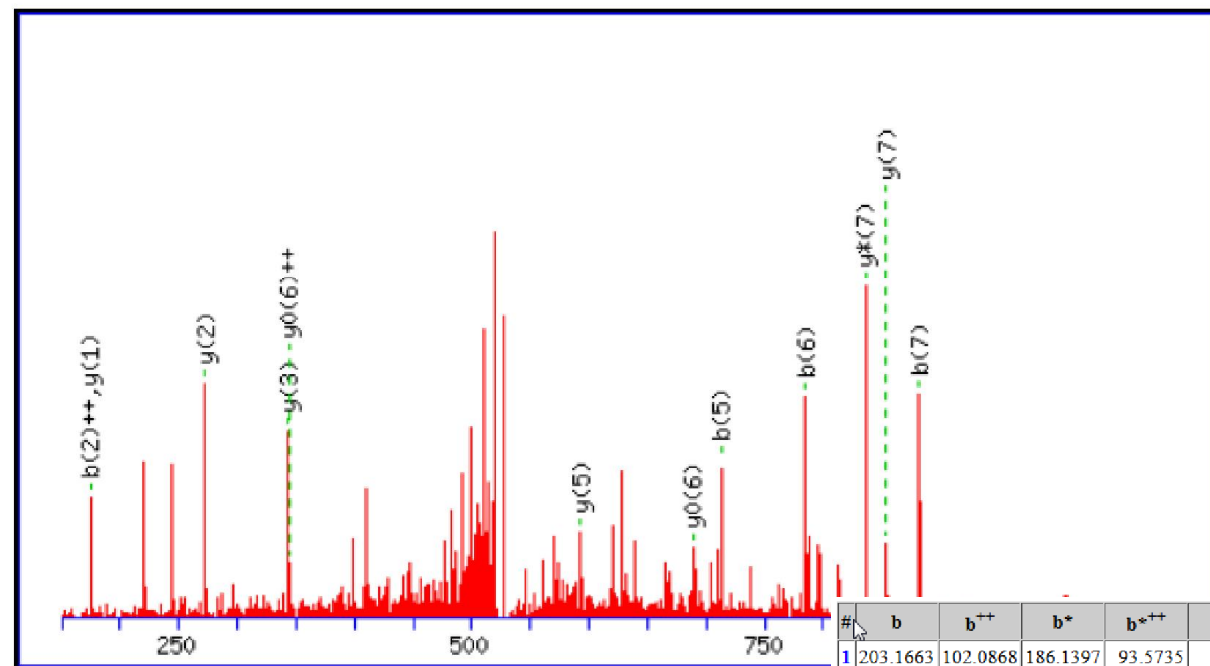

Monoisotopic mass of neutral peptide Mr(calc): 1054

Fixed modifications: Carbamidomethyl (C) (apply to

Variable modifications:

K1 : Propionyl-(13CD3)Methyl (K)

Ions Score: 23 Expect: 1.9

Matches : 12/70 fragment ions using 27 most intense

| # | b        | b <sup>++</sup> | b <sup>*</sup> | b <sup>***</sup> | b <sup>0</sup> | b <sup>0++</sup> | Seq. | y        | y <sup>++</sup> | y <sup>*</sup> | y <sup>***</sup> | y <sup>0</sup> | y <sup>0++</sup> | # |
|---|----------|-----------------|----------------|------------------|----------------|------------------|------|----------|-----------------|----------------|------------------|----------------|------------------|---|
| 1 | 203.1663 | 102.0868        | 186.1397       | 93.5735          |                |                  | K    |          |                 |                |                  |                |                  | 8 |
| 2 | 350.2347 | 175.6210        | 333.2082       | 167.1077         |                |                  | F    | 853.4567 | 427.2320        | 836.4301       | 418.7187         | 835.4461       | 418.2267         | 7 |
| 3 | 463.3188 | 232.1630        | 446.2922       | 223.6497         |                |                  | L    | 706.3883 | 353.6978        | 689.3617       | 345.1845         | 688.3777       | 344.6925         | 6 |
| 4 | 626.3821 | 313.6947        | 609.3555       | 305.1814         |                |                  | Y    | 593.3042 | 297.1557        | 576.2776       | 288.6425         | 575.2936       | 288.1504         | 5 |
| 5 | 713.4141 | 357.2107        | 696.3876       | 348.6974         | 695.4036       | 348.2054         | S    | 430.2409 | 215.6241        | 413.2143       | 207.1108         | 412.2303       | 206.6188         | 4 |
| 6 | 784.4512 | 392.7293        | 767.4247       | 384.2160         | 766.4407       | 383.7240         | A    | 343.2088 | 172.1081        | 326.1823       | 163.5948         |                |                  | 3 |
| 7 | 881.5040 | 441.2556        | 864.4775       | 432.7424         | 863.4934       | 432.2504         | P    | 272.1717 | 136.5895        | 255.1452       | 128.0762         |                |                  | 2 |
| 8 |          |                 |                |                  |                |                  | R    | 175.1190 | 88.0631         | 158.0924       | 79.5498          |                |                  | 1 |



MS/MS Fragmentation of **ARTKQTAR**

Found in **Q71DI3**, Histone H3.2 OS=Homo sapiens GN=HIST2H3A PE=1 SV=3

Match to Query 3684: 1060.625708 from(531.320130,2+) intensity(6067194.0000)

Title: File1986 Spectrum4699 scans: 5618

Data file 2013-12-03-SIMM7721-FR7-ZW.mgf

Click mouse within plot area to zoom in by factor of two about that point

Or,   to  Da

Label all possible matches  Label matches used for scoring

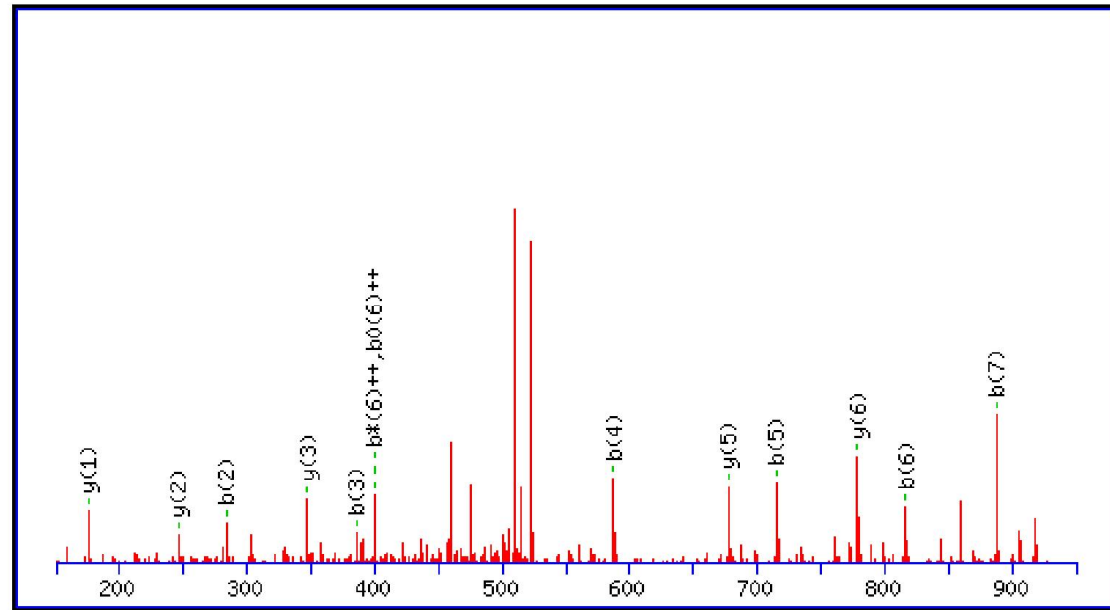

**Monoisotopic mass of neutral peptide Mr(calc):** 1060.

**Fixed modifications:** Carbamidomethyl (C) (apply to spec:

**Variable modifications:**

**N-term :** Propionyl (protein N-term) (Protein N-term)

**K4 :** Propionyl-(13CD3)Methyl (K)

**Ions Score:** 47 **Expect:** 0.0049

**Matches :** 13/74 fragment ions using 16 most intense peaks

| # | b               | b <sup>++</sup> | b*       | b <sup>+++</sup> | b <sup>0</sup> | b <sup>0++</sup> | Seq. | y               | y <sup>++</sup> | y*       | y <sup>+++</sup> | y <sup>0</sup> | y <sup>0++</sup> | # |
|---|-----------------|-----------------|----------|------------------|----------------|------------------|------|-----------------|-----------------|----------|------------------|----------------|------------------|---|
| 1 | 128.0706        | 64.5389         |          |                  |                |                  | A    |                 |                 |          |                  |                |                  | 8 |
| 2 | <b>284.1717</b> | 142.5895        | 267.1452 | 134.0762         |                |                  | R    | 934.5701        | 467.7887        | 917.5436 | 459.2754         | 916.5596       | 458.7834         | 7 |
| 3 | <b>385.2194</b> | 193.1133        | 368.1928 | 184.6001         | 367.2088       | 184.1081         | T    | <b>778.4690</b> | 389.7381        | 761.4425 | 381.2249         | 760.4584       | 380.7329         | 6 |
| 4 | <b>587.3784</b> | 294.1928        | 570.3519 | 285.6796         | 569.3678       | 285.1876         | K    | <b>677.4213</b> | 339.2143        | 660.3948 | 330.7010         | 659.4108       | 330.2090         | 5 |
| 5 | <b>715.4370</b> | 358.2221        | 698.4104 | 349.7089         | 697.4264       | 349.2168         | Q    | 475.2623        | 238.1348        | 458.2358 | 229.6215         | 457.2518       | 229.1295         | 4 |
| 6 | <b>816.4847</b> | 408.7460        | 799.4581 | <b>400.2327</b>  | 798.4741       | <b>399.7407</b>  | T    | <b>347.2037</b> | 174.1055        | 330.1772 | 165.5922         | 329.1932       | 165.1002         | 3 |
| 7 | <b>887.5218</b> | 444.2645        | 870.4952 | 435.7513         | 869.5112       | 435.2592         | A    | <b>246.1561</b> | 123.5817        | 229.1295 | 115.0684         |                |                  | 2 |
| 8 |                 |                 |          |                  |                |                  | R    | <b>175.1190</b> | 88.0631         | 158.0924 | 79.5498          |                |                  | 1 |

Match to Query 3142: 1026.608368 from(514.311460, 2+) intensity(61330.8828)

Title: File1986 Spectrum6542 scans: 7547

Data file 2013-12-03-SIMM7721-FR7-ZW.mgf

Click mouse within plot area to zoom in by factor of two about that point

Or,   to  Da Label all possible matches  Label matches used for scoring 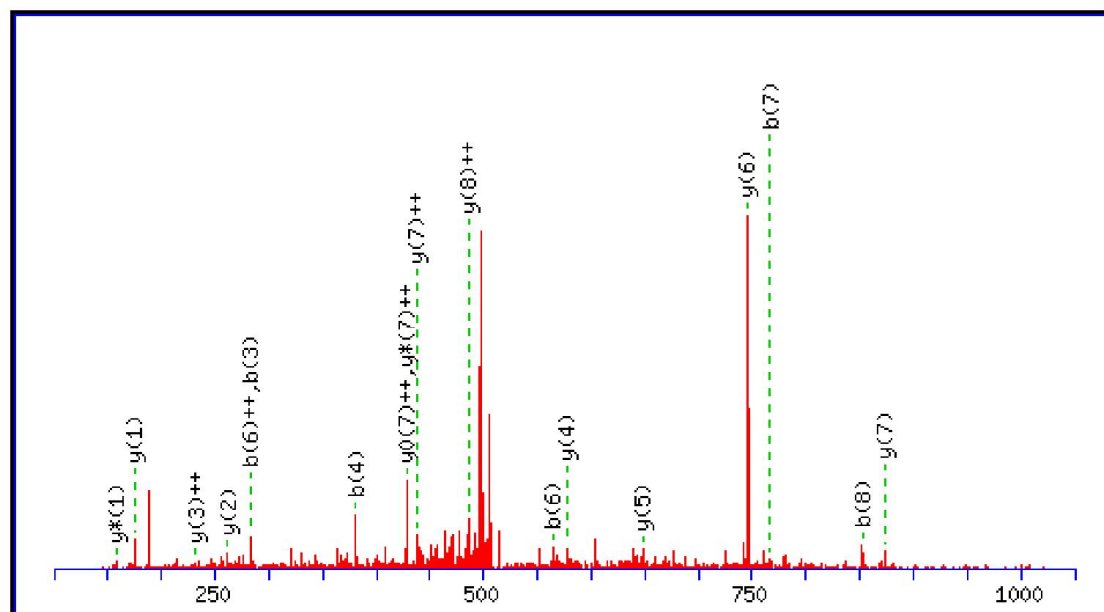**Monoisotopic mass of neutral peptide Mr(calc): 1026.****Fixed modifications:** Carbamidomethyl (C) (apply to speci**Variable modifications:****K7** : Propionyl-(13CD3)Methyl (K)**Ions Score: 23 Expect: 1.7****Matches** : 18/76 fragment ions using 54 most intense peaks

| # | b        | b <sup>++</sup> | b*       | b <sup>+++</sup> | b <sup>0</sup> | b <sup>0++</sup> | Seq. | y        | y <sup>++</sup> | y*       | y <sup>+++</sup> | y <sup>0</sup> | y <sup>0++</sup> | # |
|---|----------|-----------------|----------|------------------|----------------|------------------|------|----------|-----------------|----------|------------------|----------------|------------------|---|
| 1 | 58.0287  | 29.5180         |          |                  |                |                  | G    |          |                 |          |                  |                |                  | 9 |
| 2 | 155.0815 | 78.0444         |          |                  |                |                  | P    | 970.5953 | 485.8013        | 953.5687 | 477.2880         | 952.5847       | 476.7960         | 8 |
| 3 | 283.1401 | 142.0737        | 266.1135 | 133.5604         |                |                  | Q    | 873.5425 | 437.2749        | 856.5160 | 428.7616         | 855.5319       | 428.2696         | 7 |
| 4 | 380.1928 | 190.6001        | 363.1663 | 182.0868         |                |                  | P    | 745.4839 | 373.2456        | 728.4574 | 364.7323         | 727.4734       | 364.2403         | 6 |
| 5 | 451.2300 | 226.1186        | 434.2034 | 217.6053         |                |                  | A    | 648.4312 | 324.7192        | 631.4046 | 316.2059         | 630.4206       | 315.7139         | 5 |
| 6 | 564.3140 | 282.6607        | 547.2875 | 274.1474         |                |                  | L    | 577.3947 | 289.2007        | 560.3675 | 280.6874         | 559.3835       | 280.1954         | 4 |
| 7 | 766.4730 | 383.7402        | 749.4465 | 375.2269         |                |                  | K    | 464.3100 | 232.6586        | 447.2834 | 224.1454         | 446.2994       | 223.6534         | 3 |
| 8 | 853.5051 | 427.2562        | 836.4785 | 418.7429         | 835.4945       | 418.2509         | S    | 262.1510 | 131.5791        | 245.1244 | 123.0659         | 244.1404       | 122.5738         | 2 |
| 9 |          |                 |          |                  |                |                  | R    | 175.1190 | 88.0631         | 158.0924 | 79.5498          |                |                  | 1 |

MS/MS Fragmentation of **VEIKDVR**Found in **Q8TAV4**, Stomatin-like protein 3 OS=Homo sapiens GN=STOML3 PE=1 SV=1

Match to Query 1777: 931.559488 from(466.787020, 2+) intensity(51127.5508)

Title: File2467 Spectrum7349 scans: 8584

Data file \\192.168.1.105\public\File\_exchange\Wu Zhixiang\SIMM7721\_new\7721\2013-7-17-7721-Fr10,12-ZW.mgf

Click mouse within plot area to zoom in by factor of two about that point

Or,   to  Da Label all possible matches  Label matches used for scoring 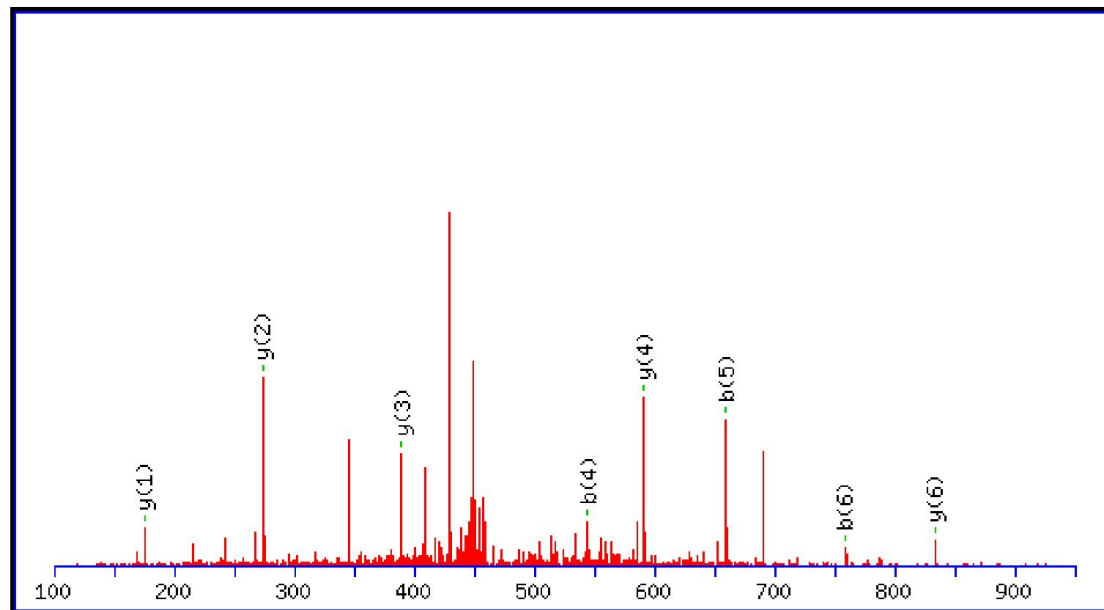**Monoisotopic mass of neutral peptide Mr(calc):** 931.5611**Fixed modifications:** Carbamidomethyl (C) (apply to specified residues or termini only)**Variable modifications:****K4** : Propionyl-(13CD3)Methyl (K)**Ions Score:** 29 **Expect:** 0.35**Matches** : 8/60 fragment ions using 17 most intense peaks

| # | b               | b <sup>++</sup> | b <sup>*</sup> | b <sup>+++</sup> | b <sup>0</sup> | b <sup>0++</sup> | Seq. | y               | y <sup>++</sup> | y <sup>*</sup> | y <sup>+++</sup> | y <sup>0</sup> | y <sup>0++</sup> | # |
|---|-----------------|-----------------|----------------|------------------|----------------|------------------|------|-----------------|-----------------|----------------|------------------|----------------|------------------|---|
| 1 | 100.0757        | 50.5415         |                |                  |                |                  | V    |                 |                 |                |                  |                |                  | 7 |
| 2 | 229.1183        | 115.0628        |                |                  | 211.1077       | 106.0575         | E    | <b>833.5000</b> | 417.2536        | 816.4734       | 408.7404         | 815.4894       | 408.2483         | 6 |
| 3 | 342.2023        | 171.6048        |                |                  | 324.1918       | 162.5995         | I    | 704.4574        | 352.7323        | 687.4308       | 344.2191         | 686.4468       | 343.7270         | 5 |
| 4 | <b>544.3614</b> | 272.6843        | 527.3348       | 264.1710         | 526.3508       | 263.6790         | K    | <b>591.3733</b> | 296.1903        | 574.3468       | 287.6770         | 573.3628       | 287.1850         | 4 |
| 5 | <b>659.3883</b> | 330.1978        | 642.3618       | 321.6845         | 641.3777       | 321.1925         | D    | <b>389.2143</b> | 195.1108        | 372.1878       | 186.5975         | 371.2037       | 186.1055         | 3 |
| 6 | <b>758.4567</b> | 379.7320        | 741.4302       | 371.2187         | 740.4462       | 370.7267         | V    | <b>274.1874</b> | 137.5973        | 257.1608       | 129.0840         |                |                  | 2 |
| 7 |                 |                 |                |                  |                |                  | R    | <b>175.1190</b> | 88.0631         | 158.0924       | 79.5493          |                |                  | 1 |

MS/MS Fragmentation of **KRPQSPSPR**

Found in **F8V1G7**, Protein SCAF11 OS=Homo sapiens GN=SCAF11 PE=2 SV=1

Match to Query 3393: 1125.649868 from(563.832210, 2+) intensity(163092.4844)

Title: File2468 Spectrum5434 scans: 6407

Data file \\192.168.1.105\public\File\_exchange\Wu Zhixiang\SIMM7721\_new\7721\2013-7-19-7721-Fr1, 2-ZW.mgf

Click mouse within plot area to zoom in by factor of two about that point

Or,   to  Da

Label all possible matches  Label matches used for scoring

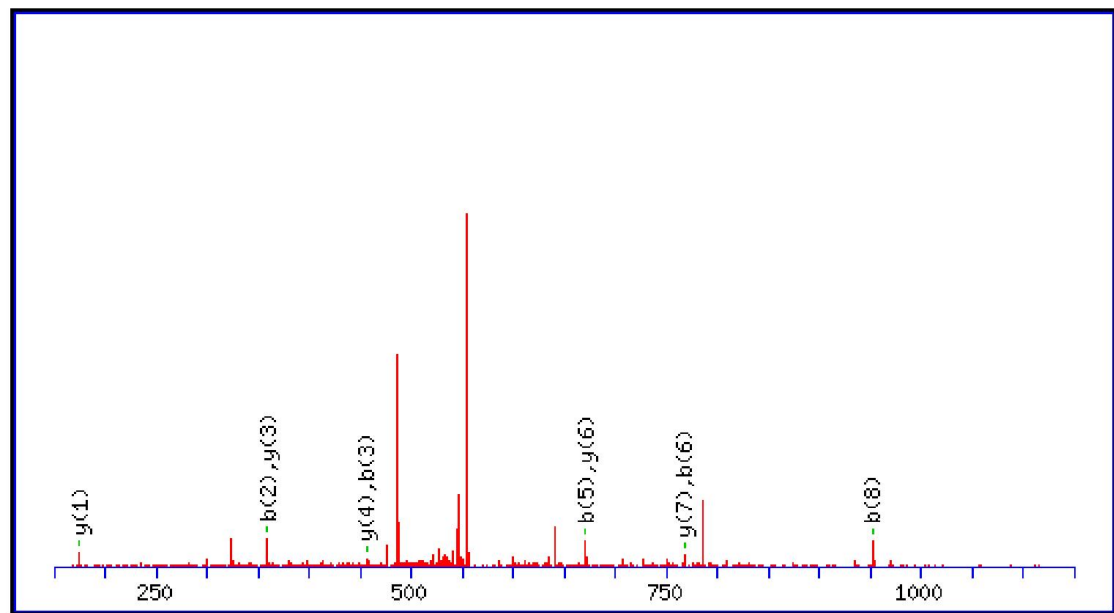

**Monoisotopic mass of neutral peptide Mr(calc): 1125.**  
**Fixed modifications:** Carbamidomethyl (C) (apply to speci  
**Variable modifications:**  
**K1** : Propionyl-(13CD3)Methyl (K)  
**Ions Score: 21 Expect: 2.9**  
**Matches : 10/84 fragment ions using 20 most intense peaks**

| # | b               | b <sup>++</sup> | b <sup>+</sup> | b <sup>+++</sup> | b <sup>0</sup> | b <sup>0++</sup> | Seq. | y               | y <sup>++</sup> | y <sup>+</sup> | y <sup>+++</sup> | y <sup>0</sup> | y <sup>0++</sup> | # |
|---|-----------------|-----------------|----------------|------------------|----------------|------------------|------|-----------------|-----------------|----------------|------------------|----------------|------------------|---|
| 1 | 203.1663        | 102.0868        | 186.1397       | 93.5735          |                |                  | K    |                 |                 |                |                  |                |                  | 9 |
| 2 | <b>359.2674</b> | 180.1373        | 342.2409       | 171.6241         |                |                  | R    | 924.5010        | 462.7541        | 907.4744       | 454.2409         | 906.4904       | 453.7489         | 8 |
| 3 | <b>456.3202</b> | 228.6637        | 439.2936       | 220.1504         |                |                  | P    | <b>768.3999</b> | 384.7036        | 751.3733       | 376.1903         | 750.3893       | 375.6983         | 7 |
| 4 | 584.3787        | 292.6930        | 567.3522       | 284.1797         |                |                  | Q    | <b>671.3471</b> | 336.1772        | 654.3206       | 327.6639         | 653.3365       | 327.1719         | 6 |
| 5 | <b>671.4108</b> | 336.2090        | 654.3842       | 327.6957         | 653.4002       | 327.2037         | S    | 543.2885        | 272.1479        | 526.2620       | 263.6346         | 525.2780       | 263.1426         | 5 |
| 6 | <b>768.4635</b> | 384.7354        | 751.4370       | 376.2221         | 750.4530       | 375.7301         | P    | <b>456.2565</b> | 228.6319        | 439.2300       | 220.1186         | 438.2459       | 219.6266         | 4 |
| 7 | 855.4956        | 428.2514        | 838.4690       | 419.7381         | 837.4850       | 419.2461         | S    | <b>359.2037</b> | 180.1055        | 342.1772       | 171.5922         | 341.1932       | 171.1002         | 3 |
| 8 | <b>952.5483</b> | 476.7778        | 935.5218       | 468.2645         | 934.5378       | 467.7725         | P    | 272.1717        | 136.5895        | 255.1452       | 128.0762         |                |                  | 2 |
| 9 |                 |                 |                |                  |                |                  | R    | <b>175.1190</b> | 88.0631         | 158.0924       | 79.5498          |                |                  | 1 |

Match to Query 9178: 1566.288402 from(523.303410, 3+) intensity(158448.1406)

Title: File2468 Spectrum11131 scans: 12484

Data file \\192.168.1.105\public\File\_exchange\Wu Zhixiang\SIMM7721\_new\7721\2013-7-19-7721-Fr1,2-ZW.mgf

Click mouse within plot area to zoom in by factor of two about that point

Or,   to  Da Label all possible matches  Label matches used for scoring 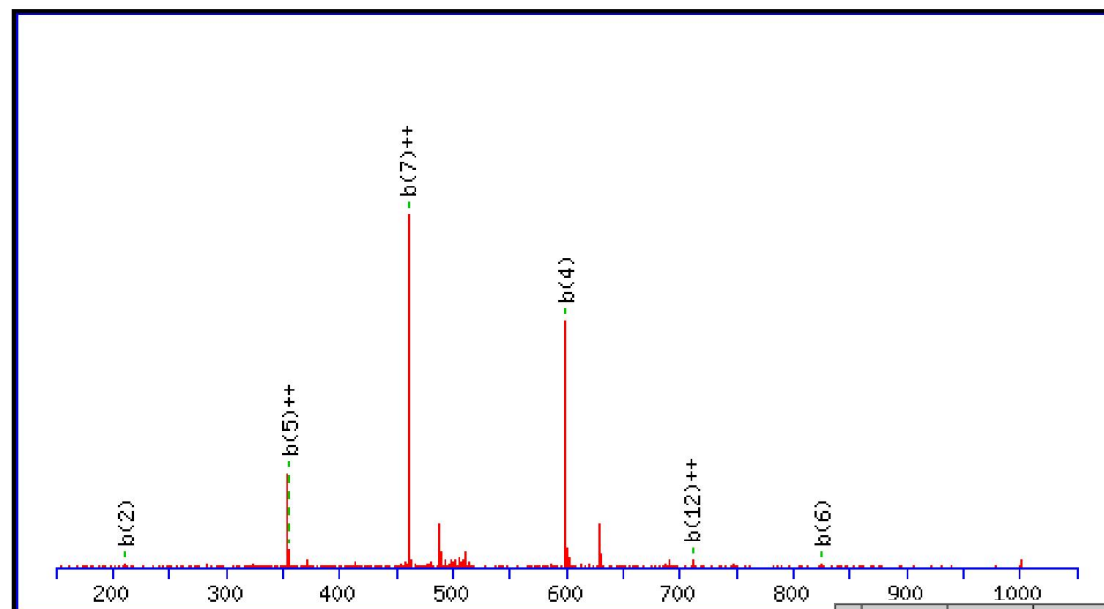Monoisotopic mass of neutral peptide **Mr(calc): 1566.288402**

Fixed modifications: Carbamidomethyl (C) (apply to spec)

Variable modifications:

**K4** : Propionyl-(13CD3)Methyl (K)

Ions Score: 26 Expect: 1.1

Matches : 6/118 fragment ions using 9 most intense peaks

| #  | b               | b <sup>++</sup> | b*        | b <sup>++</sup> | b <sup>0</sup> | b <sup>0++</sup> | Seq. | y         | y <sup>++</sup> | y*        | y <sup>++</sup> | y <sup>0</sup> | y <sup>0++</sup> | #  |
|----|-----------------|-----------------|-----------|-----------------|----------------|------------------|------|-----------|-----------------|-----------|-----------------|----------------|------------------|----|
| 1  | 98.0600         | 49.5337         |           |                 |                |                  | P    |           |                 |           |                 |                |                  | 13 |
| 2  | <b>211.1441</b> | 106.0757        |           |                 |                |                  | L    | 1470.8475 | 735.9274        | 1453.8210 | 727.4141        | 1452.8370      | 726.9221         | 12 |
| 3  | 397.2234        | 199.1153        |           |                 |                |                  | W    | 1357.7635 | 679.3854        | 1340.7369 | 670.8721        | 1339.7529      | 670.3801         | 11 |
| 4  | <b>599.3824</b> | 300.1949        | 582.3559  | 291.6816        |                |                  | K    | 1171.6842 | 586.3457        | 1154.6576 | 577.8324        | 1153.6736      | 577.3404         | 10 |
| 5  | 712.4665        | <b>356.7369</b> | 695.4399  | 348.2236        |                |                  | I    | 969.5251  | 485.2662        | 952.4986  | 476.7529        | 951.5146       | 476.2609         | 9  |
| 6  | <b>825.5506</b> | 413.2789        | 808.5240  | 404.7656        |                |                  | I    | 856.4411  | 428.7242        | 839.4145  | 420.2109        | 838.4305       | 419.7189         | 8  |
| 7  | 922.6033        | <b>461.8053</b> | 905.5768  | 453.2920        |                |                  | P    | 743.3570  | 372.1821        | 726.3305  | 363.6689        | 725.3464       | 363.1769         | 7  |
| 8  | 1023.6510       | 512.3291        | 1006.6245 | 503.8159        | 1005.6404      | 503.3239         | T    | 646.3042  | 323.6558        | 629.2777  | 315.1425        | 628.2937       | 314.6505         | 6  |
| 9  | 1124.6987       | 562.8530        | 1107.6721 | 554.3397        | 1106.6881      | 553.8477         | T    | 545.2566  | 273.1319        | 528.2300  | 264.6186        | 527.2460       | 264.1266         | 5  |
| 10 | 1252.7573       | 626.8823        | 1235.7307 | 618.3690        | 1234.7467      | 617.8770         | Q    | 444.2089  | 222.6081        | 427.1823  | 214.0948        | 426.1983       | 213.6028         | 4  |
| 11 | 1349.8100       | 675.4086        | 1332.7835 | 666.8954        | 1331.7995      | 666.4034         | P    | 316.1503  | 158.5788        |           |                 | 298.1397       | 149.5735         | 3  |
| 12 | 1420.8471       | <b>710.9272</b> | 1403.8206 | 702.4139        | 1402.8366      | 701.9219         | A    | 219.0975  | 110.0524        |           |                 | 201.0870       | 101.0471         | 2  |
| 13 |                 |                 |           |                 |                |                  | E    | 148.0604  | 74.5339         |           |                 | 130.0499       | 65.5286          | 1  |

Match to Query 15349: 2032.011688 from(1017.013120,2+) intensity(33112.8203)

Title: File2468 Spectrum9639 scans: 10892

Data file \\192.168.1.105\public\File\_exchange\Wu Zhixiang\SIMM7721\_new\7721\2013-7-19-7721-Fr1,2-ZW.mgf

Click mouse within plot area to zoom in by factor of two about that point

Or,   to  Da Label all possible matches  Label matches used for scoring 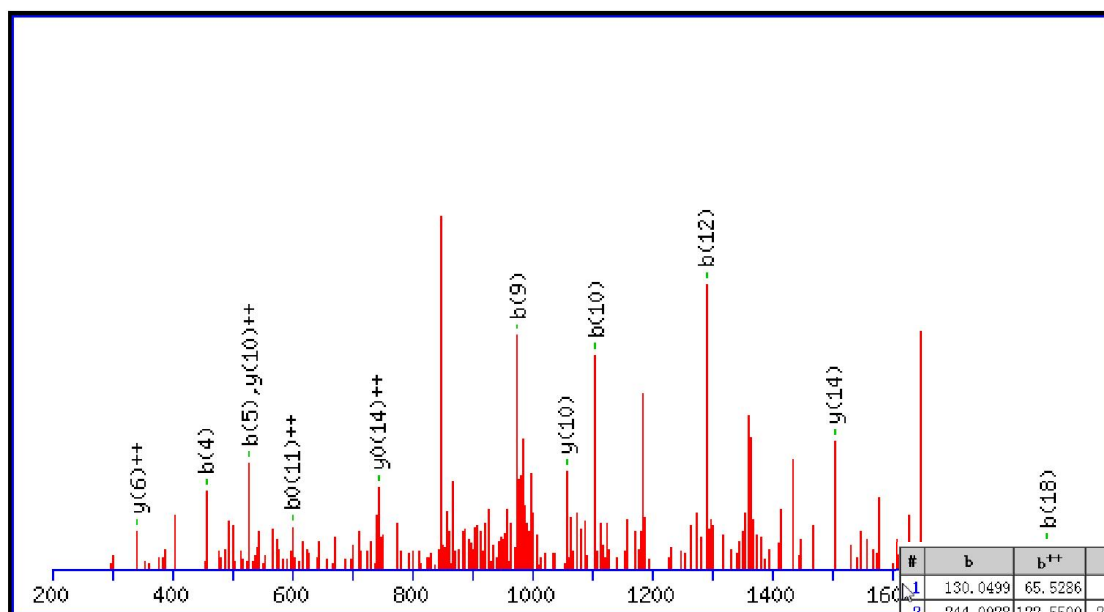**Monoisotopic mass of neutral peptide Mr(calc):** 2031.9981**Fixed modifications:** Carbamidomethyl (C) (apply to specified)**Variable modifications:****K6** : Propionyl-(13CD3)Methyl (K)**Ions Score:** 32 **Expect:** 0.28**Matches** : 12/212 fragment ions using 16 most intense peaks

| #  | b                | b <sup>++</sup> | b*        | b <sup>++</sup> * | b <sup>0</sup> | b <sup>0++</sup> | Seq.     | y                | y <sup>++</sup> | y*        | y <sup>++</sup> * | y <sup>0</sup> | y <sup>0++</sup> | #         |
|----|------------------|-----------------|-----------|-------------------|----------------|------------------|----------|------------------|-----------------|-----------|-------------------|----------------|------------------|-----------|
| 1  | 130.0499         | 65.5286         |           |                   | 112.0393       | 56.5233          | <b>E</b> |                  |                 |           |                   |                |                  | <b>19</b> |
| 2  | 244.0928         | 122.5500        | 227.0662  | 114.0368          | 226.0822       | 113.5448         | <b>N</b> | 1903.9628        | 952.4851        | 1836.9363 | 943.9718          | 1835.9523      | 943.4798         | <b>18</b> |
| 3  | 357.1769         | 179.0921        | 340.1503  | 170.5788          | 339.1663       | 170.0868         | <b>I</b> | 1789.9199        | 895.4636        | 1772.8934 | 886.9503          | 1771.9094      | 886.4583         | <b>17</b> |
| 4  | <b>458.2245</b>  | 229.6159        | 441.1980  | 221.1026          | 440.2140       | 220.6106         | <b>T</b> | 1676.8359        | 838.9216        | 1659.8093 | 830.4083          | 1658.8253      | 829.9163         | <b>16</b> |
| 5  | <b>529.2617</b>  | 265.1345        | 512.2351  | 256.6212          | 511.2511       | 256.1292         | <b>A</b> | 1575.7882        | 788.3977        | 1558.7616 | 779.8845          | 1557.7776      | 779.3924         | <b>15</b> |
| 6  | 731.4207         | 366.2140        | 714.3941  | 357.7007          | 713.4101       | 357.2087         | <b>K</b> | <b>1504.7511</b> | 752.8792        | 1487.7245 | 744.3659          | 1486.7405      | <b>743.8739</b>  | <b>14</b> |
| 7  | 802.4578         | 401.7325        | 785.4312  | 393.2193          | 784.4472       | 392.7272         | <b>A</b> | 1302.5920        | 651.7997        | 1285.5655 | 643.2864          | 1284.5815      | 642.7944         | <b>13</b> |
| 8  | 889.4898         | 445.2485        | 872.4633  | 436.7353          | 871.4792       | 436.2433         | <b>S</b> | 1231.6549        | 616.2811        | 1214.5284 | 607.7678          | 1213.5444      | 607.2758         | <b>12</b> |
| 9  | <b>976.5218</b>  | 488.7646        | 959.4953  | 480.2513          | 958.5113       | 479.7593         | <b>S</b> | 1144.5229        | 572.7651        | 1127.4964 | 564.2518          | 1126.5123      | 563.7598         | <b>11</b> |
| 10 | <b>1105.5644</b> | 553.2859        | 1088.5379 | 544.7726          | 1087.5539      | 544.2806         | <b>E</b> | <b>1057.4909</b> | <b>529.2491</b> | 1040.4643 | 520.7358          | 1039.4803      | 520.2438         | <b>10</b> |
| 11 | 1220.5914        | 610.7993        | 1203.5648 | 602.2860          | 1202.5808      | <b>601.7940</b>  | <b>D</b> | 928.4483         | 464.7278        | 911.4217  | 456.2145          | 910.4377       | 455.7225         | <b>9</b>  |
| 12 | <b>1291.6285</b> | 646.3179        | 1274.6019 | 637.8046          | 1273.6179      | 637.3126         | <b>A</b> | 813.4213         | 407.2143        | 796.3948  | 398.7010          | 795.4108       | 398.2090         | <b>8</b>  |
| 13 | 1348.6500        | 674.8286        | 1331.6234 | 666.3153          | 1330.6394      | 665.8233         | <b>G</b> | 742.3842         | 371.6958        | 725.3577  | 363.1825          | 724.3737       | 362.6905         | <b>7</b>  |
| 14 | 1445.7027        | 723.3550        | 1428.6762 | 714.8417          | 1427.6921      | 714.3497         | <b>P</b> | 685.3628         | <b>343.1850</b> | 668.3362  | 334.6717          | 667.3522       | 334.1797         | <b>6</b>  |
| 15 | 1532.7347        | 766.8710        | 1515.7082 | 758.3577          | 1514.7242      | 757.8657         | <b>S</b> | 588.3100         | 294.6586        | 571.2835  | 286.1454          | 570.2994       | 285.6534         | <b>5</b>  |
| 16 | 1629.7875        | 815.3974        | 1612.7610 | 806.8841          | 1611.7769      | 806.3921         | <b>P</b> | 501.2780         | 251.1426        | 484.2514  | 242.6293          | 483.2674       | 242.1373         | <b>4</b>  |
| 17 | 1757.8461        | 879.4267        | 1740.8195 | 870.9134          | 1739.8355      | 870.4214         | <b>Q</b> | 404.2252         | 202.6162        | 387.1987  | 194.1030          | 386.2146       | 193.6110         | <b>3</b>  |
| 18 | <b>1858.8938</b> | 929.9505        | 1841.8672 | 921.4372          | 1840.8832      | 920.9452         | <b>T</b> | 276.1666         | 138.5870        | 259.1401  | 130.0737          | 258.1561       | 129.5817         | <b>2</b>  |
| 19 |                  |                 |           |                   |                |                  | <b>R</b> | 175.1190         | 88.0631         | 158.0924  | 79.5498           |                |                  | <b>1</b>  |

MS/MS Fragmentation of **SKKEQVPSGAELER**

Found in **J3KP06**, LIM domain only protein 7 OS=Homo sapiens GN=LMO7 PE=4 SV=1

Match to Query 10535: 1686.906348 from(844.460450, 2+) intensity(147791.4844)

Title: File2468 Spectrum8789 scans: 9986

Data file \\192.168.1.105\public\File\_exchange\Wu Zhixiang\SIMM7721\_new\7721\2013-7-19-7721-Fr1, 2-ZW.mgf

Click mouse within plot area to zoom in by factor of two about that point

Or,   to  Da

Label all possible matches  Label matches used for scoring

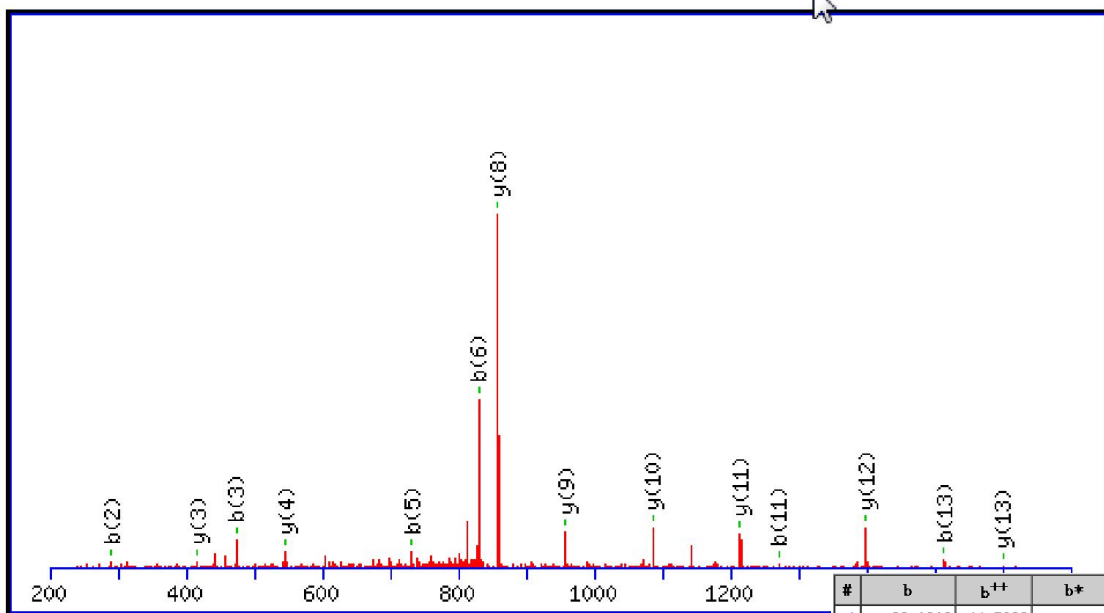

**Monoisotopic mass of neutral peptide Mr(calc): 1686.!**

**Fixed modifications:** Carbamidomethyl (C) (apply to speci

**Variable modifications:**

**K2** : Propionyl-(13CD3)Methyl (K)

**K3** : Propionyl (K)

**Ions Score: 83 Expect: 2.9e-006**

**Matches : 14/152 fragment ions using 14 most intense peaks**

| #  | b                | b <sup>++</sup> | b <sup>+</sup> | b <sup>++</sup> | b <sup>0</sup> | b <sup>0++</sup> | Seq. | y                | y <sup>++</sup> | y <sup>+</sup> | y <sup>++</sup> | y <sup>0</sup> | y <sup>0++</sup> | #  |
|----|------------------|-----------------|----------------|-----------------|----------------|------------------|------|------------------|-----------------|----------------|-----------------|----------------|------------------|----|
| 1  | 88.0393          | 44.5233         |                |                 | 70.0287        | 35.5180          | S    |                  |                 |                |                 |                |                  | 14 |
| 2  | <b>290.1983</b>  | 145.6028        | 273.1718       | 137.0895        | 272.1878       | 136.5975         | K    | <b>1600.8813</b> | 800.9443        | 1583.8548      | 792.4310        | 1582.8708      | 791.9390         | 13 |
| 3  | <b>474.3195</b>  | 237.6634        | 457.2929       | 229.1501        | 456.3089       | 228.6581         | K    | <b>1398.7223</b> | 699.8648        | 1381.6958      | 691.3515        | 1380.7118      | 690.8595         | 12 |
| 4  | 603.3621         | 302.1847        | 586.3355       | 293.6714        | 585.3515       | 293.1794         | E    | <b>1214.6012</b> | 607.8042        | 1197.5746      | 599.2909        | 1196.5906      | 598.7989         | 11 |
| 5  | <b>731.4207</b>  | 366.2140        | 714.3941       | 357.7007        | 713.4101       | 357.2087         | Q    | <b>1085.5586</b> | 543.2829        | 1068.5320      | 534.7696        | 1067.5480      | 534.2776         | 10 |
| 6  | <b>830.4891</b>  | 415.7482        | 813.4625       | 407.2349        | 812.4785       | 406.7429         | V    | <b>957.5000</b>  | 479.2536        | 940.4734       | 470.7404        | 939.4894       | 470.2483         | 9  |
| 7  | 927.5418         | 464.2746        | 910.5153       | 455.7613        | 909.5313       | 455.2693         | P    | <b>858.4316</b>  | 429.7194        | 841.4050       | 421.2061        | 840.4210       | 420.7141         | 8  |
| 8  | 1014.5739        | 507.7906        | 997.5473       | 499.2773        | 996.5633       | 498.7853         | S    | 761.3788         | 381.1930        | 744.3523       | 372.6798        | 743.3682       | 372.1878         | 7  |
| 9  | 1071.5953        | 536.3013        | 1054.5688      | 527.7880        | 1053.5848      | 527.2960         | G    | 674.3468         | 337.6770        | 657.3202       | 329.1638        | 656.3362       | 328.6717         | 6  |
| 10 | 1142.6325        | 571.8199        | 1125.6059      | 563.3066        | 1124.6219      | 562.8146         | A    | 617.3253         | 309.1663        | 600.2988       | 300.6530        | 599.3148       | 300.1610         | 5  |
| 11 | <b>1271.6750</b> | 636.3412        | 1254.6485      | 627.8279        | 1253.6645      | 627.3359         | E    | <b>546.2882</b>  | 273.6477        | 529.2617       | 265.1345        | 528.2776       | 264.6425         | 4  |
| 12 | 1384.7591        | 692.8832        | 1367.7326      | 684.3699        | 1366.7485      | 683.8779         | L    | <b>417.2456</b>  | 209.1264        | 400.2191       | 200.6132        | 399.2350       | 200.1212         | 3  |
| 13 | <b>1513.8017</b> | 757.4045        | 1496.7752      | 748.8912        | 1495.7911      | 748.3992         | E    | 304.1615         | 152.5844        | 287.1350       | 144.0711        | 286.1510       | 143.5791         | 2  |
| 14 |                  |                 |                |                 |                |                  | R    | 175.1190         | 88.0631         | 158.0924       | 79.5498         |                |                  | 1  |

Match to Query 5340: 1210.725188 from(606.369870,2+) intensity(59204.6523)

Title: File2474 Spectrum12217 scans: 13685

Data file \\192.168.1.105\public\File\_exchange\Wu Zhixiang\SIMM7721\_new\7721\2013-7-19-7721-Fr3,4-ZW.mgf

Click mouse within plot area to zoom in by factor of two about that point

Or, Plot from  to  Da Label all possible matches  Label matches used for scoring 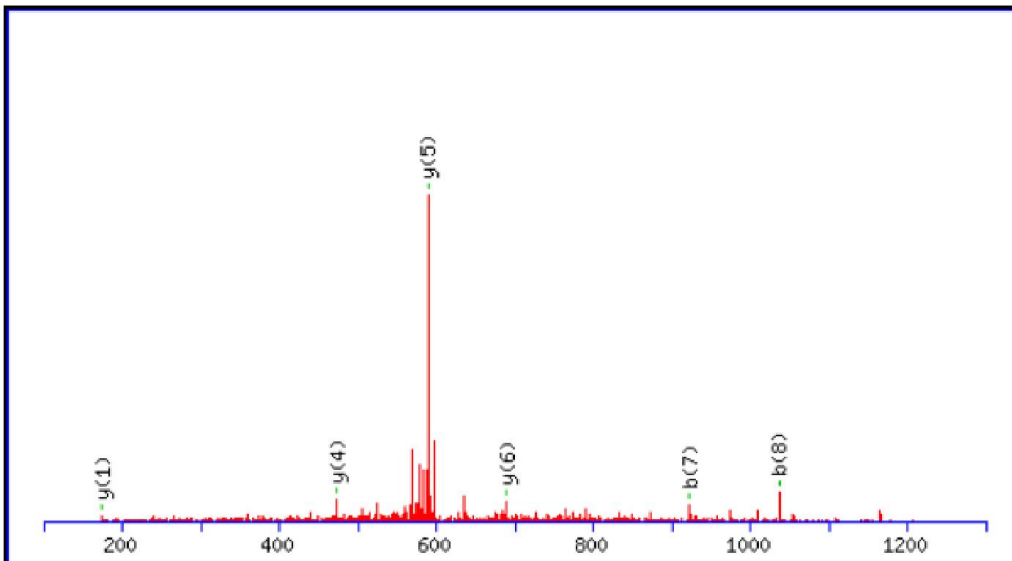

Monoisotopic mass of neutral peptide Mr(calc): 1209.7184

Fixed modifications: Carbamidomethyl (C) (apply to specified residues or termini only)

Variable modifications:

N-term : Propionyl-(13CD3)Methyl (Protein N-term)

K2 : Propionyl-(13CD3)Methyl (K)

Ions Score: 20 Expect: 2.7

Matches : 6/82 fragment ions using 11 most intense peaks

| # | b                | b <sup>++</sup> | b*        | b <sup>+++</sup> | b <sup>0</sup> | b <sup>0++</sup> | Seq. | y               | y <sup>++</sup> | y*       | y <sup>+++</sup> | y <sup>0</sup> | y <sup>0++</sup> | # |
|---|------------------|-----------------|-----------|------------------|----------------|------------------|------|-----------------|-----------------|----------|------------------|----------------|------------------|---|
| 1 | 206.1118         | 103.5595        |           |                  |                |                  | M    |                 |                 |          |                  |                |                  | 9 |
| 2 | 408.2708         | 204.6390        | 391.2443  | 196.1258         |                |                  | K    | 1005.6212       | 503.3142        | 988.5946 | 494.8009         | 987.6106       | 494.3089         | 8 |
| 3 | 521.3549         | 261.1811        | 504.3283  | 252.6678         |                |                  | L    | 803.4621        | 402.2347        | 786.4356 | 393.7214         | 785.4516       | 393.2294         | 7 |
| 4 | 622.4026         | 311.7049        | 605.3760  | 303.1916         | 604.3920       | 302.6996         | T    | <b>690.3781</b> | 345.6927        | 673.3515 | 337.1794         | 672.3675       | 336.6874         | 6 |
| 5 | 737.4295         | 369.2184        | 720.4030  | 360.7051         | 719.4189       | 360.2131         | D    | <b>589.3304</b> | 295.1688        | 572.3039 | 286.6556         | 571.3198       | 286.1636         | 5 |
| 6 | 824.4615         | 412.7344        | 807.4350  | 404.2211         | 806.4510       | 403.7291         | S    | <b>474.3035</b> | 237.6554        | 457.2769 | 229.1421         | 456.2929       | 228.6501         | 4 |
| 7 | <b>923.5300</b>  | 462.2686        | 906.5034  | 453.7553         | 905.5194       | 453.2633         | V    | 387.2714        | 194.1394        | 370.2449 | 185.6261         |                |                  | 3 |
| 8 | <b>1036.6140</b> | 518.8106        | 1019.5875 | 510.2974         | 1018.6035      | 509.8054         | L    | 288.2030        | 144.6051        | 271.1765 | 136.0919         |                |                  | 2 |
| 9 |                  |                 |           |                  |                |                  | R    | <b>175.1190</b> | 88.0631         | 158.0924 | 79.5498          |                |                  | 1 |



Found in **H7BZ93**, Histone-lysine N-methyltransferase SETD2 (Fragment) OS=Homo sapiens GN=SETD2 PE=4 SV=1

Match to Query 3595: 1082.644868 from(542.329710,2+) intensity(422100.2500)

Title: File2474 Spectrum3905 scans: 4809

Data file \\192.168.1.105\public\File\_exchange\Wu Zhixiang\SIMM7721\_new\7721\2013-7-19-7721-Fr3,4-ZW.mgf

Click mouse within plot area to zoom in by factor of two about that point

Or,  150 to 1100 Da Label all possible matches  Label matches used for scoring 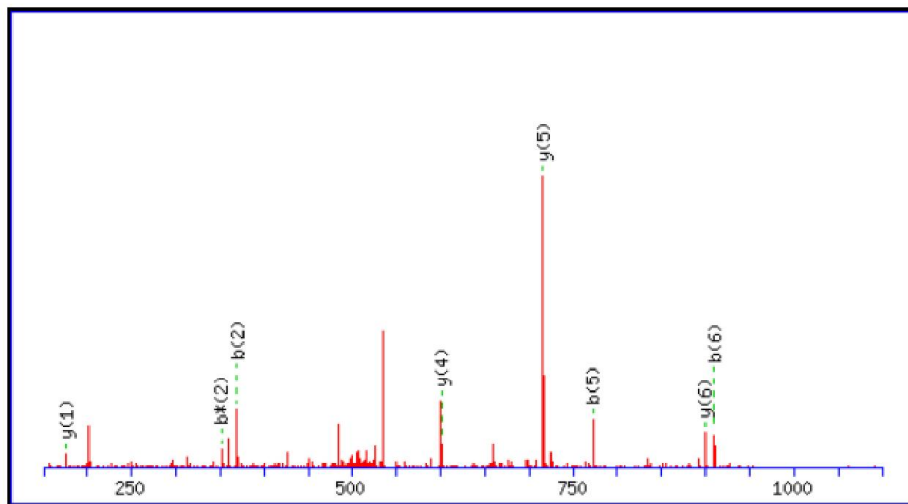

Monoisotopic mass of neutral peptide Mr(calc): 1082.6469

Fixed modifications: Carbamidomethyl (C) (apply to specified residues or termini only)

Variable modifications:

K1 : Propionyl (K)

K2 : Propionyl (K)

K4 : Propionyl-(13CD3)Methyl (K)

Ions Score: 22 Expect: 1.9

Matches : 8/60 fragment ions using 17 most intense peaks ([help](#))

| # | b               | b <sup>++</sup> | b*              | b <sup>*++</sup> | b <sup>0</sup> | b <sup>0++</sup> | Seq. | y               | y <sup>++</sup> | y*       | y <sup>*++</sup> | y <sup>0</sup> | y <sup>0++</sup> | # |
|---|-----------------|-----------------|-----------------|------------------|----------------|------------------|------|-----------------|-----------------|----------|------------------|----------------|------------------|---|
| 1 | 185.1285        | 93.0679         | 168.1019        | 84.5546          |                |                  | K    |                 |                 |          |                  |                |                  | 7 |
| 2 | <b>369.2496</b> | 185.1285        | <b>352.2231</b> | 176.6152         |                |                  | K    | <b>899.5330</b> | 450.2701        | 882.5065 | 441.7569         | 881.5224       | 441.2649         | 6 |
| 3 | 483.2926        | 242.1499        | 466.2660        | 233.6366         |                |                  | N    | <b>715.4118</b> | 358.2096        | 698.3853 | 349.6963         | 697.4013       | 349.2043         | 5 |
| 4 | 685.4516        | 343.2294        | 668.4250        | 334.7161         |                |                  | K    | <b>601.3689</b> | 301.1881        | 584.3424 | 292.6748         | 583.3583       | 292.1828         | 4 |
| 5 | <b>772.4836</b> | 386.7454        | 755.4571        | 378.2322         | 754.4730       | 377.7402         | S    | 399.2099        | 200.1086        | 382.1833 | 191.5953         | 381.1993       | 191.1033         | 3 |
| 6 | <b>909.5425</b> | 455.2749        | 892.5160        | 446.7616         | 891.5319       | 446.2696         | H    | 312.1779        | 156.5926        | 295.1513 | 148.0793         |                |                  | 2 |
| 7 |                 |                 |                 |                  |                |                  | R    | <b>175.1190</b> | 88.0631         | 158.0924 | 79.5498          |                |                  | 1 |

Found in **B4DKY1**, Cysteine--tRNA ligase, cytoplasmic OS=Homo sapiens GN=CARS PE=2 SV=1

Match to Query 5410: 1214.723128 from(608.368840,2+) intensity(91779.4063)

Title: File2474 Spectrum4830 scans: 5797

Data file \\192.168.1.105\public\File\_exchange\Wu Zhixiang\SIMM7721\_new\7721\2013-7-19-7721-Fr3,4-ZW.mgf

Click mouse within plot area to zoom in by factor of two about that point

Or,  100 to 1300 Da Label all possible matches  Label matches used for scoring 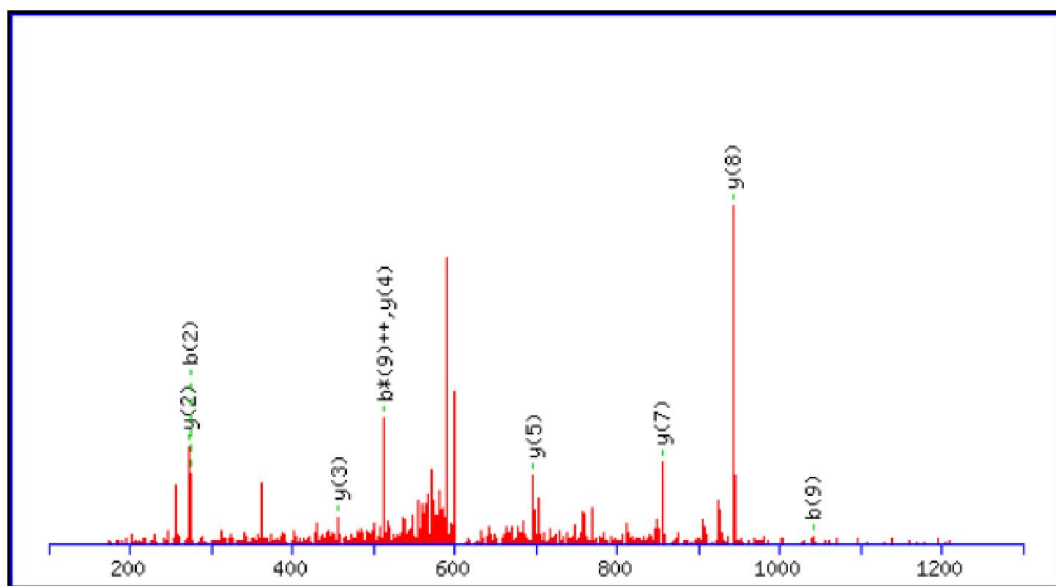

Monoisotopic mass of neutral peptide Mr(calc): 1214.7255

Fixed modifications: Carbamidomethyl (C) (apply to specified residues or termini only)

Variable modifications:

K2 : Propionyl-(13CD3)Methyl (K)

K6 : Propionyl (K)

K8 : Propionyl (K)

Ions Score: 50 Expect: 0.0024

Matches : 9/90 fragment ions using 11 most intense peaks

| #  | b                | b <sup>++</sup> | b <sup>*</sup> | b <sup>*++</sup> | b <sup>0</sup> | b <sup>0++</sup> | Seq. | y               | y <sup>++</sup> | y <sup>*</sup> | y <sup>*++</sup> | y <sup>0</sup> | y <sup>0++</sup> | #  |
|----|------------------|-----------------|----------------|------------------|----------------|------------------|------|-----------------|-----------------|----------------|------------------|----------------|------------------|----|
| 1  | 72.0444          | 36.5258         |                |                  |                |                  | A    |                 |                 |                |                  |                |                  | 10 |
| 2  | <b>274.2034</b>  | 137.6053        | 257.1769       | 129.0921         |                |                  | K    | 1144.6957       | 572.8515        | 1127.6692      | 564.3382         | 1126.6852      | 563.8462         | 9  |
| 3  | 361.2354         | 181.1214        | 344.2089       | 172.6081         | 343.2249       | 172.1161         | S    | <b>942.5367</b> | 471.7720        | 925.5102       | 463.2587         | 924.5261       | 462.7667         | 8  |
| 4  | 448.2675         | 224.6374        | 431.2409       | 216.1241         | 430.2569       | 215.6321         | S    | <b>855.5047</b> | 428.2560        | 838.4781       | 419.7427         | 837.4941       | 419.2507         | 7  |
| 5  | 519.3046         | 260.1559        | 502.2780       | 251.6427         | 501.2940       | 251.1506         | A    | 768.4727        | 384.7400        | 751.4461       | 376.2267         |                |                  | 6  |
| 6  | 703.4258         | 352.2165        | 686.3992       | 343.7032         | 685.4152       | 343.2112         | K    | <b>697.4355</b> | 349.2214        | 680.4090       | 340.7081         |                |                  | 5  |
| 7  | 760.4472         | 380.7272        | 743.4207       | 372.2140         | 742.4366       | 371.7220         | G    | <b>513.3144</b> | 257.1608        | 496.2878       | 248.6475         |                |                  | 4  |
| 8  | 944.5684         | 472.7878        | 927.5418       | 464.2746         | 926.5578       | 463.7826         | K    | <b>456.2929</b> | 228.6501        | 439.2663       | 220.1368         |                |                  | 3  |
| 9  | <b>1041.6212</b> | 521.3142        | 1024.5946      | <b>512.8009</b>  | 1023.6106      | 512.3089         | P    | <b>272.1717</b> | 136.5895        | 255.1452       | 128.0762         |                |                  | 2  |
| 10 |                  |                 |                |                  |                |                  | R    | 175.1190        | 88.0631         | 158.0924       | 79.5498          |                |                  | 1  |

Found in **Q9H0H5**, Rac GTPase-activating protein 1 OS=Homo sapiens GN=RACGAP1 PE=1 SV=1

Match to Query 8290: 1481.813088 from(741.913820,2+) intensity(55957.7969)

Title: File2470 Spectrum8755 scans: 9996

Data file \\192.168.1.105\public\File\_exchange\Wu Zhixiang\SIMM7721\_new\7721\2013-7-19-7721-Fr13,14-ZW.mgf

Click mouse within plot area to zoom in by factor of two about that point

Or,  200 to 1500 Da Label all possible matches  Label matches used for scoring 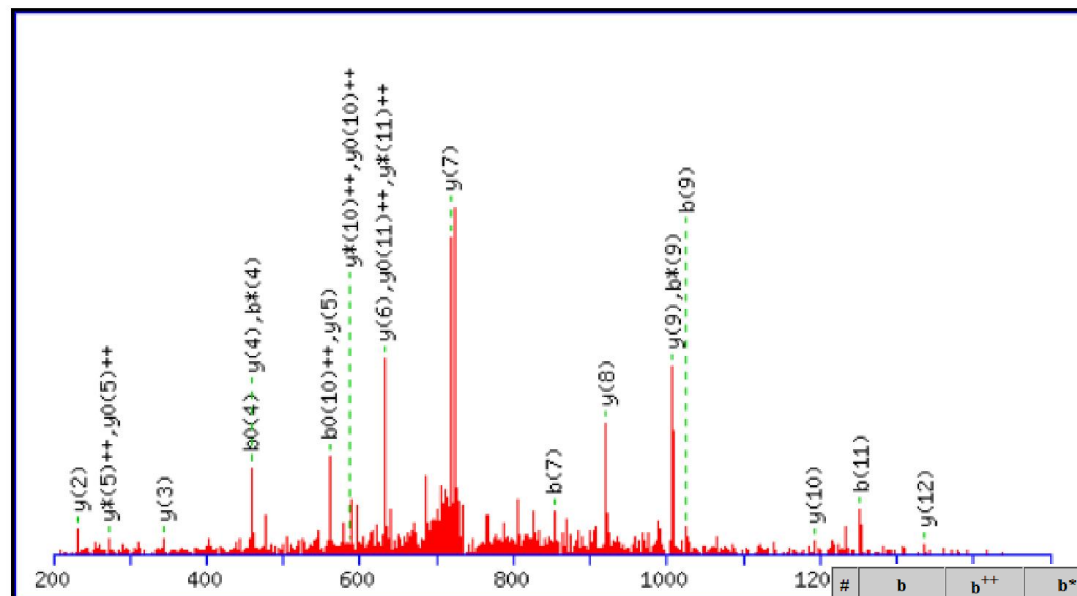

Monoisotopic mass of neutral peptide Mr(calc): 1481.8111  
 Fixed modifications: Carbamidomethyl (C) (apply to specific  
 Variable modifications:  
 K4 : Propionyl (K)  
 K6 : Propionyl-(13CD3)Methyl (K)  
 Ions Score: 78 Expect: 7.6e-006  
 Matches : 23/126 fragment ions using 26 most intense peak

| #  | b         | b <sup>++</sup> | b <sup>*</sup> | b <sup>*++</sup> | b <sup>0</sup> | b <sup>0++</sup> | Seq | y         | y <sup>++</sup> | y <sup>*</sup> | y <sup>*++</sup> | y <sup>0</sup> | y <sup>0++</sup> | #  |
|----|-----------|-----------------|----------------|------------------|----------------|------------------|-----|-----------|-----------------|----------------|------------------|----------------|------------------|----|
| 1  | 148.0757  | 74.5415         |                |                  |                |                  | F   |           |                 |                |                  |                |                  | 13 |
| 2  | 205.0972  | 103.0522        |                |                  |                |                  | G   | 1335.7499 | 668.3786        | 1318.7234      | 659.8653         | 1317.7394      | 659.3733         | 12 |
| 3  | 292.1292  | 146.5682        |                |                  | 274.1186       | 137.5629         | S   | 1278.7285 | 639.8679        | 1261.7019      | 631.3546         | 1260.7179      | 630.8626         | 11 |
| 4  | 476.2504  | 238.6288        | 459.2238       | 230.1155         | 458.2398       | 229.6235         | K   | 1191.6964 | 596.3519        | 1174.6699      | 587.8386         | 1173.6859      | 587.3466         | 10 |
| 5  | 563.2824  | 282.1448        | 546.2558       | 273.6316         | 545.2718       | 273.1395         | S   | 1007.5753 | 504.2913        | 990.5487       | 495.7780         | 989.5647       | 495.2860         | 9  |
| 6  | 765.4414  | 383.2243        | 748.4149       | 374.7111         | 747.4308       | 374.2191         | K   | 920.5432  | 460.7753        | 903.5167       | 452.2620         | 902.5327       | 451.7700         | 8  |
| 7  | 852.4734  | 426.7404        | 835.4469       | 418.2271         | 834.4629       | 417.7351         | S   | 718.3842  | 359.6958        | 701.3577       | 351.1825         | 700.3737       | 350.6905         | 7  |
| 8  | 923.5105  | 462.2589        | 906.4840       | 453.7456         | 905.5000       | 453.2536         | A   | 631.3522  | 316.1797        | 614.3257       | 307.6665         | 613.3416       | 307.1745         | 6  |
| 9  | 1024.5582 | 512.7827        | 1007.5317      | 504.2695         | 1006.5477      | 503.7775         | T   | 560.3151  | 280.6612        | 543.2885       | 272.1479         | 542.3045       | 271.6559         | 5  |
| 10 | 1138.6011 | 569.8042        | 1121.5746      | 561.2909         | 1120.5906      | 560.7989         | N   | 459.2674  | 230.1373        | 442.2409       | 221.6241         |                |                  | 4  |
| 11 | 1251.6852 | 626.3462        | 1234.6587      | 617.8330         | 1233.6746      | 617.3410         | L   | 345.2245  | 173.1159        | 328.1979       | 164.6026         |                |                  | 3  |
| 12 | 1308.7067 | 654.8570        | 1291.6801      | 646.3437         | 1290.6961      | 645.8517         | G   | 232.1404  | 116.5738        | 215.1139       | 108.0606         |                |                  | 2  |
| 13 |           |                 |                |                  |                |                  | R   | 175.1190  | 88.0631         | 158.0924       | 79.5498          |                |                  | 1  |

Match to Query 20874: 3205.751176 from(802.445070,4+) intensity(46632.4727)

Title: File2473 Spectrum15088 scans: 16639

Data file \\192.168.1.105\public\File\_exchange\Wu Zhixiang\SIMM7721\_new\7721\2013-7-19-7721-Fr19,20ZW.mgf

Click mouse within plot area to zoom in by factor of two about that point

Or,  200  1700  Label all possible matches  Label matches used for scoring 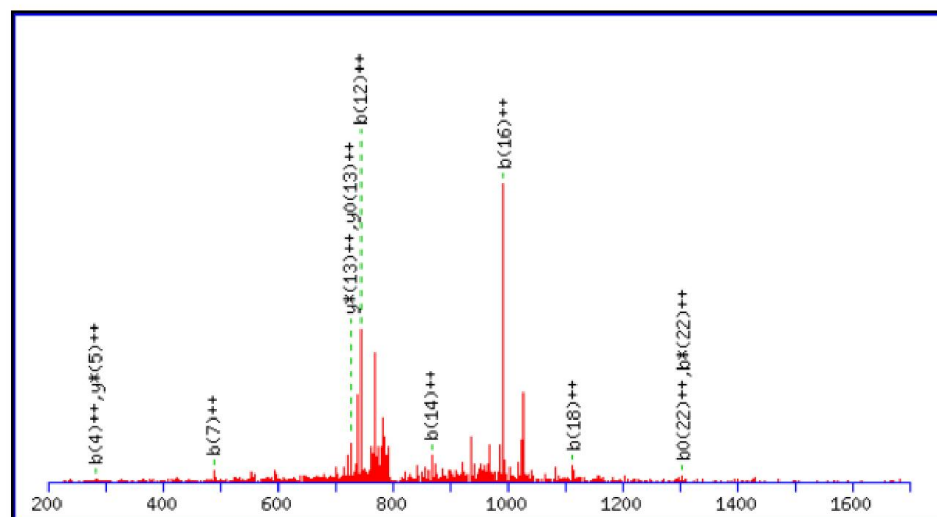

Monoisotopic mass of neutral peptide Mr(calc): 3205.7296

Fixed modifications: Carbamidomethyl (C) (apply to specified residues or termini or

Variable modifications:

K1 : Propionyl-(13CD3)Methyl (K)

K7 : Propionyl (K)

K19 : Propionyl (K)

Ions Score: 21 Expect: 4.2

Matches : 11/302 fragment ions using 15 most intense peaks ([help](#))

| #  | b         | b <sup>++</sup>  | b <sup>*</sup> | b <sup>++</sup>  | b <sup>0</sup> | b <sup>0++</sup> | Seq. | y         | y <sup>++</sup> | y <sup>*</sup> | y <sup>++</sup> | y <sup>0</sup> | y <sup>0++</sup> | #  |
|----|-----------|------------------|----------------|------------------|----------------|------------------|------|-----------|-----------------|----------------|-----------------|----------------|------------------|----|
| 1  | 203.1663  | 102.0868         | 186.1397       | 93.5735          |                |                  | K    |           |                 |                |                 |                |                  | 27 |
| 2  | 302.2347  | 151.6210         | 285.2082       | 143.1077         |                |                  | V    | 3004.5779 | 1502.7926       | 2987.5513      | 1494.2793       | 2986.5673      | 1493.7873        | 26 |
| 3  | 417.2616  | 209.1335         | 400.2351       | 200.6212         | 399.2511       | 200.1292         | D    | 2905.5094 | 1453.2584       | 2888.4829      | 1444.7451       | 2887.4989      | 1444.2531        | 25 |
| 4  | 564.3301  | <b>282.6687</b>  | 547.3035       | 274.1554         | 546.3195       | 273.6634         | F    | 2790.4825 | 1395.7449       | 2773.4559      | 1387.2316       | 2772.4719      | 1386.7396        | 24 |
| 5  | 679.3570  | 340.1821         | 662.3305       | 331.6689         | 661.3464       | 331.1769         | D    | 2643.4141 | 1322.2107       | 2626.3875      | 1313.6974       | 2625.4035      | 1313.2054        | 23 |
| 6  | 792.4411  | 396.7242         | 775.4145       | 388.2109         | 774.4305       | 387.7189         | I    | 2528.3871 | 1264.6972       | 2511.3606      | 1256.1839       | 2510.3766      | 1255.6919        | 22 |
| 7  | 976.5622  | <b>488.7848</b>  | 959.5357       | 480.2715         | 958.5517       | 479.7795         | K    | 2415.3031 | 1208.1552       | 2398.2765      | 1199.6419       | 2397.2925      | 1199.1499        | 21 |
| 8  | 1033.5837 | 517.2955         | 1016.5572      | 508.7822         | 1015.5731      | 508.2902         | G    | 2231.1819 | 1116.0946       | 2214.1553      | 1107.5813       | 2213.1713      | 1107.0893        | 20 |
| 9  | 1148.6107 | 574.8090         | 1131.5841      | 566.2957         | 1130.6001      | 565.8037         | D    | 2174.1604 | 1087.5839       | 2157.1339      | 1079.0706       | 2156.1499      | 1078.5786        | 19 |
| 10 | 1263.6376 | 632.3224         | 1246.6110      | 623.8092         | 1245.6270      | 623.3172         | D    | 2059.1335 | 1030.0704       | 2042.1069      | 1021.5571       | 2041.1229      | 1021.0651        | 18 |
| 11 | 1376.7217 | 688.8645         | 1359.6951      | 680.3512         | 1358.7111      | 679.8592         | L    | 1944.1065 | 972.5569        | 1927.0800      | 964.0436        | 1926.0960      | 963.5516         | 17 |
| 12 | 1489.8057 | <b>745.4065</b>  | 1472.7792      | 736.8932         | 1471.7952      | 736.4012         | I    | 1831.0225 | 916.0149        | 1813.9959      | 907.5016        | 1813.0119      | 907.0096         | 16 |
| 13 | 1588.8741 | 794.9407         | 1571.8476      | 786.4274         | 1570.8636      | 785.9354         | V    | 1717.9384 | 859.4728        | 1700.9119      | 850.9596        | 1699.9279      | 850.4676         | 15 |
| 14 | 1735.9426 | <b>868.4749</b>  | 1718.9160      | 859.9616         | 1717.9920      | 859.4696         | F    | 1618.8700 | 809.9386        | 1601.8435      | 801.4254        | 1600.8594      | 800.9334         | 14 |
| 15 | 1849.0266 | 925.0169         | 1832.0001      | 916.5037         | 1831.0161      | 916.0117         | L    | 1471.8016 | 736.4044        | 1454.7750      | <b>727.8912</b> | 1453.7910      | <b>727.3992</b>  | 13 |
| 16 | 1986.0855 | <b>993.5464</b>  | 1969.0590      | 985.0331         | 1968.0750      | 984.5411         | H    | 1358.7175 | 679.8624        | 1341.6910      | 671.3491        | 1340.7070      | 670.8571         | 12 |
| 17 | 2099.1696 | 1050.0884        | 2082.1430      | 1041.5752        | 2081.1590      | 1041.0832        | I    | 1221.6586 | 611.3329        | 1204.6321      | 602.8197        | 1203.6480      | 602.3277         | 11 |
| 18 | 2227.2282 | <b>1114.1177</b> | 2210.2016      | 1105.6044        | 2209.2176      | 1105.1124        | Q    | 1108.5746 | 554.7909        | 1091.5480      | 546.2776        | 1090.5640      | 545.7856         | 10 |
| 19 | 2411.3493 | 1206.1783        | 2394.3228      | 1197.6650        | 2393.3388      | 1197.1730        | K    | 980.5160  | 490.7616        | 963.4894       | 482.2483        | 962.5054       | 481.7563         | 9  |
| 20 | 2512.3970 | 1256.7022        | 2495.3705      | 1248.1889        | 2494.3865      | 1247.6969        | T    | 796.3948  | 398.7010        | 779.3682       | 390.1878        | 778.3842       | 389.6958         | 8  |
| 21 | 2569.4185 | 1285.2129        | 2552.3919      | 1276.6996        | 2551.4079      | 1276.2076        | G    | 695.3471  | 348.1772        | 678.3206       | 339.6639        | 677.3366       | 339.1719         | 7  |
| 22 | 2626.4400 | 1313.7236        | 2609.4134      | <b>1305.2108</b> | 2608.4294      | <b>1304.7183</b> | G    | 638.3257  | 319.6665        | 621.2991       | 311.1532        | 620.3151       | 310.6612         | 6  |
| 23 | 2727.4876 | 1364.2475        | 2710.4611      | 1355.7342        | 2709.4771      | 1355.2422        | T    | 581.3042  | 291.1557        | 564.2776       | <b>282.6425</b> | 563.2936       | 282.1504         | 5  |
| 24 | 2828.5353 | 1414.7713        | 2811.5088      | 1406.2580        | 2810.5247      | 1405.7660        | T    | 480.2565  | 240.6319        | 463.2300       | 232.1186        | 462.2459       | 231.6266         | 4  |
| 25 | 2975.6037 | 1488.3055        | 2958.5772      | 1479.7922        | 2957.5932      | 1479.3002        | F    | 379.2088  | 190.1081        | 362.1823       | 181.5948        |                |                  | 3  |
| 26 | 3032.6252 | 1516.8162        | 3015.5986      | 1508.3030        | 3014.6146      | 1507.8110        | G    | 232.1404  | 116.5738        | 215.1139       | 108.0606        |                |                  | 2  |
| 27 |           |                  |                |                  |                |                  | R    | 175.1190  | 88.0631         | 158.0924       | 79.5498         |                |                  | 1  |

Found in **Q27J81**, Inverted formin-2 OS=Homo sapiens GN=INF2 PE=1 SV=2

Match to Query 1872: 989.541848 from(495.778200,2+) intensity(19062.1289)

Title: File2472 Spectrum4569 scans: 5487

Data file \\192.168.1.105\public\File\_exchange\Wu Zhixiang\SIMM7721\_new\7721\2013-7-19-7721-Fr17,18-ZW.mgf

Click mouse within plot area to zoom in by factor of two about that point

Or,   to  Da Label all possible matches  Label matches used for scoring 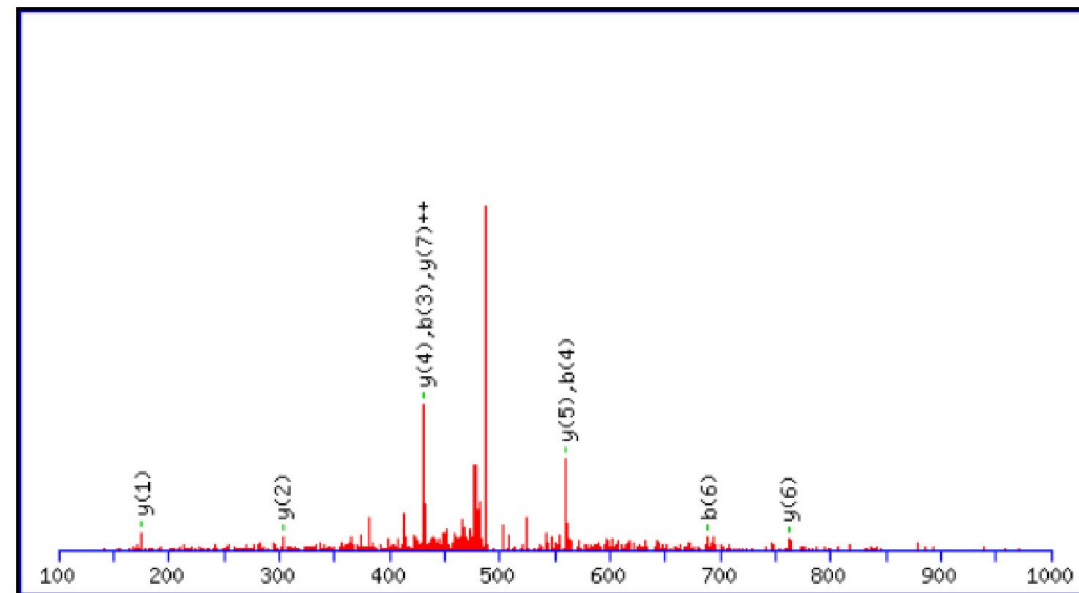

Monoisotopic mass of neutral peptide Mr(calc): 989.5414

Fixed modifications: Carbamidomethyl (C) (apply to specific)

Variable modifications:

N-term : Acetyl (Protein N-term)

K3 : Propionyl-(13CD3)Methyl (K)

Ions Score: 38 Expect: 0.048

Matches : 9/72 fragment ions using 9 most intense peaks

| # | b        | b <sup>++</sup> | b <sup>*</sup> | b <sup>*++</sup> | b <sup>0</sup> | b <sup>0++</sup> | Seq. | y        | y <sup>++</sup> | y <sup>*</sup> | y <sup>*++</sup> | y <sup>0</sup> | y <sup>0++</sup> | # |
|---|----------|-----------------|----------------|------------------|----------------|------------------|------|----------|-----------------|----------------|------------------|----------------|------------------|---|
| 1 | 130.0499 | 65.5286         |                |                  | 112.0393       | 56.5233          | S    |          |                 |                |                  |                |                  | 8 |
| 2 | 229.1183 | 115.0628        |                |                  | 211.1077       | 106.0575         | V    | 861.5061 | 431.2567        | 844.4796       | 422.7434         | 843.4956       | 422.2514         | 7 |
| 3 | 431.2773 | 216.1423        | 414.2507       | 207.6290         | 413.2667       | 207.1370         | K    | 762.4377 | 381.7225        | 745.4112       | 373.2092         | 744.4271       | 372.7172         | 6 |
| 4 | 560.3199 | 280.6636        | 543.2933       | 272.1503         | 542.3093       | 271.6583         | E    | 560.2787 | 280.6430        | 543.2522       | 272.1297         | 542.2681       | 271.6377         | 5 |
| 5 | 617.3414 | 309.1743        | 600.3148       | 300.6610         | 599.3308       | 300.1690         | G    | 431.2361 | 216.1217        | 414.2096       | 207.6084         |                |                  | 4 |
| 6 | 688.3785 | 344.6929        | 671.3519       | 336.1796         | 670.3679       | 335.6876         | A    | 374.2146 | 187.6110        | 357.1881       | 179.0977         |                |                  | 3 |
| 7 | 816.4370 | 408.7222        | 799.4105       | 400.2089         | 798.4265       | 399.7169         | Q    | 303.1775 | 152.0924        | 286.1510       | 143.5791         |                |                  | 2 |
| 8 |          |                 |                |                  |                |                  | R    | 175.1190 | 88.0631         | 158.0924       | 79.5498          |                |                  | 1 |

Found in **K7EK29**, Protein Hook homolog 2 OS=Homo sapiens GN=HOOK2 PE=4 SV=1

Match to Query 5846: 1183.728988 from(592.871770,2+) intensity(394601.5938)

Title: File2471 Spectrum11151 scans: 12358

Data file \\192.168.1.105\public\File\_exchange\Wu Zhixiang\SIMM7721\_new\7721\2013-7-19-7721-Fr15,16-ZW.mgf

Click mouse within plot area to zoom in by factor of two about that point

Or,  100 to  Da Label all possible matches  Label matches used for scoring 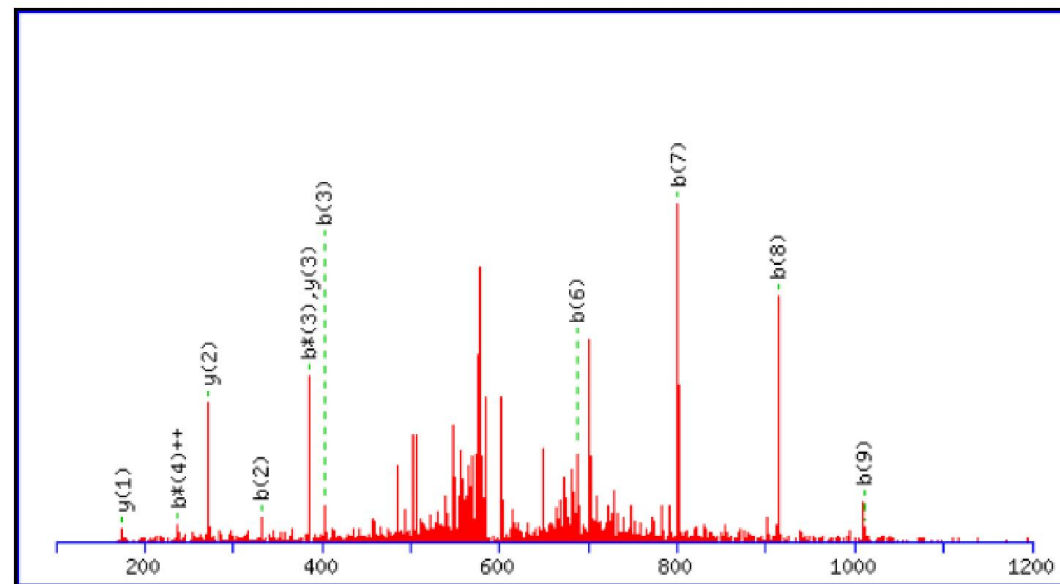

Monoisotopic mass of neutral peptide Mr(calc): 1183.7197

Fixed modifications: Carbamidomethyl (C) (apply to specific)

Variable modifications:

K1 : Propionyl-(13CD3)Methyl (K)

Ions Score: 33 Expect: 0.13

Matches : 11/94 fragment ions using 21 most intense peaks

| #  | b                | b <sup>++</sup> | b*              | b <sup>*++</sup> | b <sup>0</sup> | b <sup>0++</sup> | Seq. | y               | y <sup>++</sup> | y*       | y <sup>*++</sup> | y <sup>0</sup> | y <sup>0++</sup> | #  |
|----|------------------|-----------------|-----------------|------------------|----------------|------------------|------|-----------------|-----------------|----------|------------------|----------------|------------------|----|
| 1  | 203.1663         | 102.0868        | 186.1397        | 93.5735          |                |                  | K    |                 |                 |          |                  |                |                  | 10 |
| 2  | <b>331.2249</b>  | 166.1161        | 314.1983        | 157.6028         |                |                  | Q    | 982.5680        | 491.7876        | 965.5415 | 483.2744         | 964.5574       | 482.7824         | 9  |
| 3  | <b>402.2620</b>  | 201.6346        | <b>385.2354</b> | 193.1214         |                |                  | A    | 854.5094        | 427.7584        | 837.4829 | 419.2451         | 836.4989       | 418.7531         | 8  |
| 4  | 489.2940         | 245.1506        | 472.2675        | <b>236.6374</b>  | 471.2834       | 236.1454         | S    | 783.4723        | 392.2398        | 766.4458 | 383.7265         | 765.4618       | 383.2345         | 7  |
| 5  | 586.3468         | 293.6770        | 569.3202        | 285.1638         | 568.3362       | 284.6717         | P    | 696.4403        | 348.7238        | 679.4137 | 340.2105         | 678.4297       | 339.7185         | 6  |
| 6  | <b>687.3945</b>  | 344.2009        | 670.3679        | 335.6876         | 669.3839       | 335.1956         | T    | 599.3875        | 300.1974        | 582.3610 | 291.6841         | 581.3770       | 291.1921         | 5  |
| 7  | <b>800.4785</b>  | 400.7429        | 783.4520        | 392.2296         | 782.4680       | 391.7376         | L    | 498.3398        | 249.6736        | 481.3133 | 241.1603         |                |                  | 4  |
| 8  | <b>913.5626</b>  | 457.2849        | 896.5360        | 448.7717         | 895.5520       | 448.2796         | I    | <b>385.2558</b> | 193.1315        | 368.2292 | 184.6183         |                |                  | 3  |
| 9  | <b>1010.6153</b> | 505.8113        | 993.5888        | 497.2980         | 992.6048       | 496.8060         | P    | <b>272.1717</b> | 136.5895        | 255.1452 | 128.0762         |                |                  | 2  |
| 10 |                  |                 |                 |                  |                |                  | R    | <b>175.1190</b> | 88.0631         | 158.0924 | 79.5498          |                |                  | 1  |

Found in **P35579**, Myosin-9 OS=Homo sapiens GN=MYH9 PE=1 SV=4

Match to Query 7849: 1302.779768 from(652.397160,2+) intensity(1046549.3750)

Title: File2471 Spectrum13819 scans: 15204

Data file \\192.168.1.105\public\File\_exchange\Wu\_Zhixiang\SIMM7721\_new\7721\2013-7-19-7721-Fr15,16-ZW.mgf

Click mouse within plot area to zoom in by factor of two about that point

Or,   to  Da Label all possible matches  Label matches used for scoring 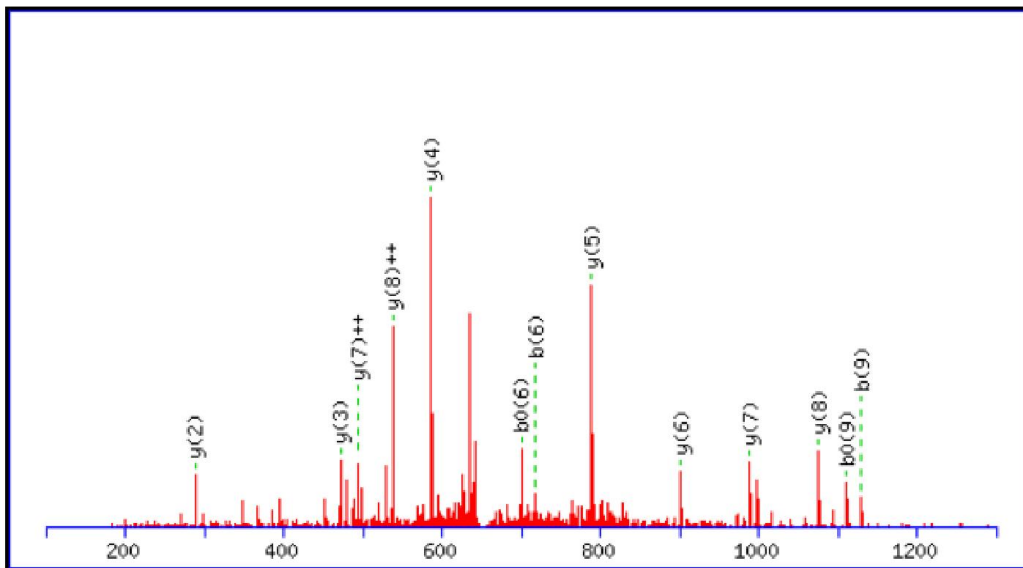

Monoisotopic mass of neutral peptide Mr(calc): 1302.7780

Fixed modifications: Carbamidomethyl (C) (apply to specified)

Variable modifications:

K6 : Propionyl-(13CD3)Methyl (K)

K8 : Propionyl (K)

Ions Score: 47 Expect: 0.0061

Matches : 13/86 fragment ions using 23 most intense peaks

| #  | b                | b <sup>++</sup> | b <sup>*</sup> | b <sup>+++</sup> | b <sup>0</sup>   | b <sup>0++</sup> | Seq. | y                | y <sup>++</sup> | y <sup>*</sup> | y <sup>+++</sup> | y <sup>0</sup> | y <sup>0++</sup> | #  |
|----|------------------|-----------------|----------------|------------------|------------------|------------------|------|------------------|-----------------|----------------|------------------|----------------|------------------|----|
| 1  | 130.0499         | 65.5286         |                |                  | 112.0393         | 56.5233          | E    |                  |                 |                |                  |                |                  | 10 |
| 2  | 229.1183         | 115.0628        |                |                  | 211.1077         | 106.0575         | V    | 1174.7427        | 587.8750        | 1157.7161      | 579.3617         | 1156.7321      | 578.8697         | 9  |
| 3  | 316.1503         | 158.5788        |                |                  | 298.1397         | 149.5735         | S    | <b>1075.6743</b> | <b>538.3408</b> | 1058.6477      | 529.8275         | 1057.6637      | 529.3355         | 8  |
| 4  | 403.1823         | 202.0948        |                |                  | 385.1718         | 193.0895         | S    | <b>988.6422</b>  | <b>494.8248</b> | 971.6157       | 486.3115         | 970.6317       | 485.8195         | 7  |
| 5  | 516.2664         | 258.6368        |                |                  | 498.2558         | 249.6316         | L    | <b>901.6102</b>  | 451.3087        | 884.5836       | 442.7955         |                |                  | 6  |
| 6  | <b>718.4254</b>  | 359.7163        | 701.3989       | 351.2031         | <b>700.4149</b>  | 350.7111         | K    | <b>788.5261</b>  | 394.7667        | 771.4996       | 386.2534         |                |                  | 5  |
| 7  | 832.4683         | 416.7378        | 815.4418       | 408.2245         | 814.4578         | 407.7325         | N    | <b>586.3671</b>  | 293.6872        | 569.3406       | 285.1739         |                |                  | 4  |
| 8  | 1016.5895        | 508.7984        | 999.5630       | 500.2851         | 998.5790         | 499.7931         | K    | <b>472.3242</b>  | 236.6657        | 455.2976       | 228.1525         |                |                  | 3  |
| 9  | <b>1129.6736</b> | 565.3404        | 1112.6470      | 556.8272         | <b>1111.6630</b> | 556.3351         | L    | <b>288.2030</b>  | 144.6051        | 271.1765       | 136.0919         |                |                  | 2  |
| 10 |                  |                 |                |                  |                  |                  | R    | 175.1190         | 88.0631         | 158.0924       | 79.5498          |                |                  | 1  |

Match to Query 178397: 3089.709732 from(1030.910520, 3+) intensity(268016.9688)

Title: File2475 Spectrum192127 scans: 20487

Data file \\192.168.1.105\public\File\_exchange\Wu Zhixiang\SIMM7721\_new\7721\2013-7-19-7721-Fr5, 6ZW.mgf

Click mouse within plot area to zoom in by factor of two about that point

Or,   to  Da Label all possible matches  Label matches used for scoring 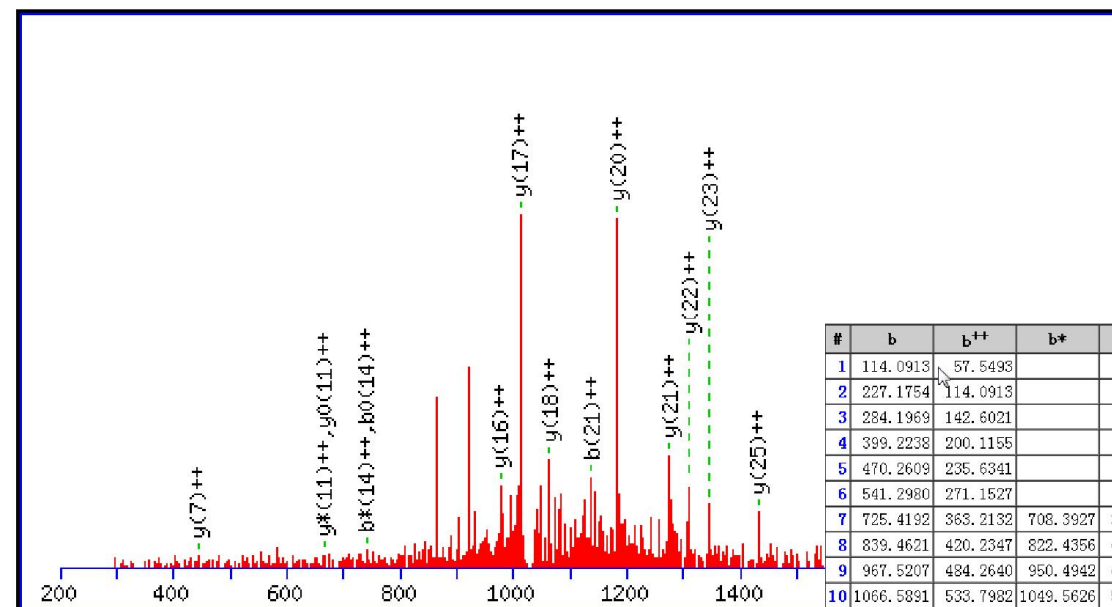**Monoisotopic mass of neutral peptide Mr(calc): 3089****Fixed modifications:** Carbamidomethyl (C) (apply to spec)**Variable modifications:****K7** : Propionyl (K)**M12** : Label:13C(1)2H(3)+Oxidation (M)**K22** : Propionyl-(13C3)Methyl (K)**Ions Score: 23 Expect: 1.8****Matches : 15/280 fragment ions using 34 most intense peak**

| #  | b         | b <sup>++</sup> | b*        | b <sup>+++</sup> | b <sup>0</sup> | b <sup>0++</sup> | Seq. | y         | y <sup>++</sup> | y*        | y <sup>+++</sup> | y <sup>0</sup> | y <sup>0++</sup> | #  |
|----|-----------|-----------------|-----------|------------------|----------------|------------------|------|-----------|-----------------|-----------|------------------|----------------|------------------|----|
| 1  | 114.0913  | 57.5493         |           |                  |                |                  | L    |           |                 |           |                  |                |                  | 27 |
| 2  | 227.1754  | 114.0913        |           |                  |                |                  | I    | 2977.6069 | 1489.3071       | 2960.5804 | 1480.7938        | 2959.5964      | 1480.3018        | 26 |
| 3  | 284.1969  | 142.6021        |           |                  |                |                  | G    | 2864.5229 | 1432.7651       | 2847.4963 | 1424.2518        | 2846.5123      | 1423.7598        | 25 |
| 4  | 399.2238  | 200.1155        |           |                  | 381.2132       | 191.1103         | D    | 2807.5014 | 1404.2543       | 2790.4748 | 1395.7411        | 2789.4908      | 1395.2491        | 24 |
| 5  | 470.2609  | 235.6341        |           |                  | 452.2504       | 225.6288         | A    | 2692.4745 | 1346.7409       | 2675.4479 | 1338.2276        | 2674.4639      | 1337.7356        | 23 |
| 6  | 541.2980  | 271.1527        |           |                  | 523.2875       | 262.1474         | A    | 2621.4373 | 1311.2223       | 2604.4108 | 1302.7090        | 2603.4268      | 1302.2170        | 22 |
| 7  | 725.4192  | 363.2132        | 708.3927  | 354.7000         | 707.4087       | 354.2080         | K    | 2550.4002 | 1275.7037       | 2533.3737 | 1267.1905        | 2532.3897      | 1266.6985        | 21 |
| 8  | 839.4621  | 420.2347        | 822.4356  | 411.7214         | 821.4516       | 411.2294         | N    | 2366.2790 | 1183.6432       | 2349.2525 | 1175.1299        | 2348.2685      | 1174.6379        | 20 |
| 9  | 967.5207  | 484.2640        | 950.4942  | 475.7507         | 949.5102       | 475.2587         | Q    | 2252.2361 | 1126.6217       | 2235.2096 | 1118.1084        | 2234.2256      | 1117.6164        | 19 |
| 10 | 1066.5891 | 533.7982        | 1049.5626 | 525.2849         | 1048.5786      | 524.7929         | V    | 2124.1775 | 1062.5924       | 2107.1510 | 1054.0791        | 2106.1670      | 1053.5871        | 18 |
| 11 | 1137.6263 | 569.3168        | 1120.5997 | 560.8035         | 1119.6157      | 560.3115         | A    | 2025.1091 | 1013.0582       | 2008.0826 | 1004.5449        | 2007.0986      | 1004.0529        | 17 |
| 12 | 1288.6838 | 644.8456        | 1271.6573 | 636.3323         | 1270.6733      | 635.8403         | N    | 1954.0720 | 977.5396        | 1937.0455 | 969.0264         | 1936.0614      | 968.5344         | 16 |
| 13 | 1402.7268 | 701.8670        | 1385.7002 | 693.3537         | 1384.7162      | 692.8617         | N    | 1803.0144 | 902.0109        | 1785.9879 | 893.4976         | 1785.0039      | 893.0056         | 15 |
| 14 | 1499.7795 | 750.3934        | 1482.7530 | 741.8801         | 1481.7690      | 741.3881         | P    | 1682.9715 | 844.9894        | 1671.9450 | 836.4761         | 1670.9609      | 835.9841         | 14 |
| 15 | 1627.8381 | 814.4227        | 1610.8116 | 805.9094         | 1609.8275      | 805.4174         | Q    | 1591.9187 | 796.4630        | 1574.8922 | 787.9497         | 1573.9082      | 787.4577         | 13 |
| 16 | 1741.8810 | 871.4442        | 1724.8545 | 862.9309         | 1723.8705      | 862.4389         | N    | 1463.8602 | 732.4337        | 1446.8336 | 723.9204         | 1445.8496      | 723.4284         | 12 |
| 17 | 1842.9287 | 921.9630        | 1825.9022 | 913.4547         | 1824.9181      | 912.9627         | T    | 1349.8172 | 675.4123        | 1332.7907 | 666.8990         | 1331.8067      | 666.4070         | 11 |
| 18 | 1941.9971 | 971.5022        | 1924.9706 | 962.9839         | 1923.9866      | 962.4969         | V    | 1248.7696 | 624.8884        | 1231.7430 | 616.3751         | 1230.7590      | 615.8831         | 10 |
| 19 | 2089.0655 | 1045.0364       | 2072.0390 | 1036.5231        | 2071.0550      | 1036.0311        | F    | 1149.7011 | 575.3542        | 1132.6746 | 566.8409         | 1131.6906      | 566.3489         | 9  |
| 20 | 2204.0925 | 1102.5499       | 2187.0659 | 1094.0366        | 2186.0819      | 1093.5446        | D    | 1002.8327 | 501.8200        | 985.8062  | 493.3067         | 984.8222       | 492.8147         | 8  |
| 21 | 2275.1296 | 1138.0684       | 2258.1030 | 1129.5552        | 2257.1190      | 1129.0632        | A    | 887.6058  | 444.3065        | 870.5792  | 435.7933         |                |                  | 7  |
| 22 | 2477.2886 | 1239.1479       | 2460.2621 | 1230.6347        | 2459.2780      | 1230.1427        | K    | 816.5687  | 408.7880        | 799.5421  | 400.2747         |                |                  | 6  |
| 23 | 2633.3897 | 1317.1985       | 2616.3632 | 1308.6852        | 2615.3792      | 1308.1932        | R    | 614.4097  | 307.7085        | 597.3831  | 299.1952         |                |                  | 5  |
| 24 | 2746.4738 | 1373.7405       | 2729.4472 | 1365.2273        | 2728.4632      | 1364.7352        | L    | 458.3085  | 229.6579        | 441.2820  | 221.1446         |                |                  | 4  |
| 25 | 2859.5578 | 1430.2826       | 2842.5313 | 1421.7693        | 2841.5473      | 1421.2773        | I    | 345.2245  | 173.1159        | 328.1979  | 164.6026         |                |                  | 3  |
| 26 | 2916.5793 | 1458.7933       | 2899.5528 | 1450.2800        | 2898.5687      | 1449.7880        | G    | 232.1404  | 116.5738        | 215.1139  | 108.0606         |                |                  | 2  |
| 27 |           |                 |           |                  |                |                  | R    | 175.1190  | 88.0631         | 158.0924  | 79.5498          |                |                  | 1  |



MS/MS Fragmentation of **KAKKAHPR**Found in **E9PL73**, Protein FAM9B OS=Homo sapiens GN=FAM9B PE=2 SV=1

Match to Query 34632: 1120.697488 from(561.356020, 2+) intensity(202018.6406)

Title: File2475 Spectrum181455 scans: 8846

Data file \\192.168.1.105\public\File\_exchange\Wu Zhixiang\SIMM7721\_new\7721\2013-7-19-7721-Fr5, 6ZW.mgf

Click mouse within plot area to zoom in by factor of two about that point

Or,   to  Da Label all possible matches  Label matches used for scoring 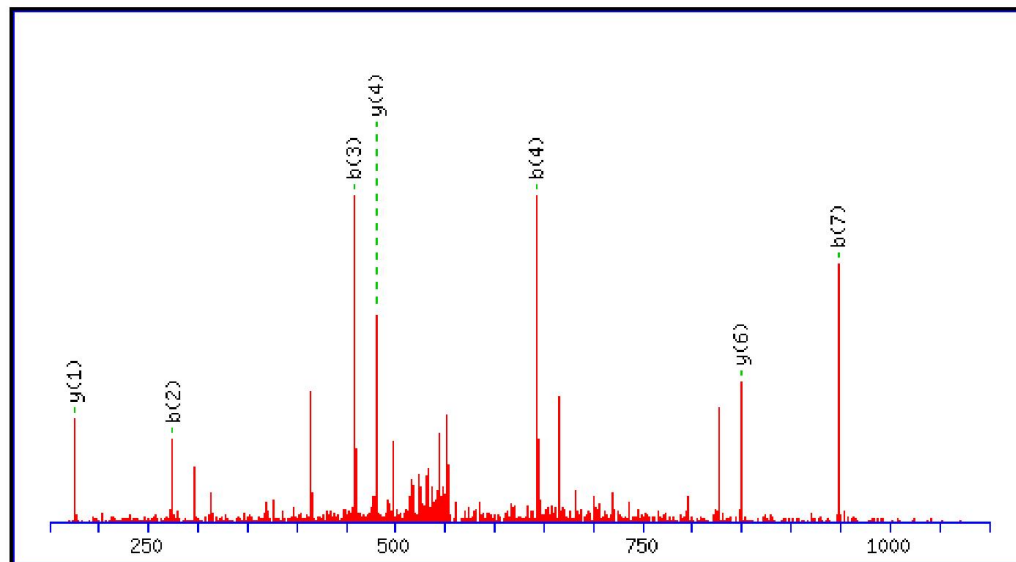**Monoisotopic mass of neutral peptide Mr(calc):** 1120.6989**Fixed modifications:** Carbamidomethyl (C) (apply to specified)**Variable modifications:****K1** : Propionyl-(13CD3)Methyl (K)**K3** : Propionyl (K)**K4** : Propionyl (K)**Ions Score:** 26 **Expect:** 0.47**Matches** : 7/56 fragment ions using 10 most intense peaks (help)

| # | b               | b <sup>++</sup> | b*       | b* <sup>++</sup> | Seq.     | y               | y <sup>++</sup> | y*       | y* <sup>++</sup> | #        |
|---|-----------------|-----------------|----------|------------------|----------|-----------------|-----------------|----------|------------------|----------|
| 1 | 203.1663        | 102.0868        | 186.1397 | 93.5735          | <b>K</b> |                 |                 |          |                  | <b>8</b> |
| 2 | <b>274.2034</b> | 137.6053        | 257.1769 | 129.0921         | <b>A</b> | 919.5472        | 460.2772        | 902.5207 | 451.7640         | <b>7</b> |
| 3 | <b>458.3246</b> | 229.6659        | 441.2980 | 221.1527         | <b>K</b> | <b>848.5101</b> | 424.7587        | 831.4835 | 416.2454         | <b>6</b> |
| 4 | <b>642.4458</b> | 321.7265        | 625.4192 | 313.2132         | <b>K</b> | 664.3889        | 332.6981        | 647.3624 | 324.1848         | <b>5</b> |
| 5 | 713.4829        | 357.2451        | 696.4563 | 348.7318         | <b>A</b> | <b>480.2677</b> | 240.6375        | 463.2412 | 232.1242         | <b>4</b> |
| 6 | 850.5418        | 425.7745        | 833.5152 | 417.2613         | <b>H</b> | 409.2306        | 205.1190        | 392.2041 | 196.6057         | <b>3</b> |
| 7 | <b>947.5945</b> | 474.3009        | 930.5680 | 465.7876         | <b>P</b> | 272.1717        | 136.5895        | 255.1452 | 128.0762         | <b>2</b> |
| 8 |                 |                 |          |                  | <b>R</b> | <b>175.1190</b> | 88.0631         | 158.0924 | 79.5498          | <b>1</b> |

MS/MS Fragmentation of **FVPAEMGTHTVSVVKYKGGQHVPGSPFQFTVGPLGEGGAHKVVR**

Found in **Q5HY54**, Filamin-A OS=Homo sapiens GN=FLNA PE=2 SV=1

Match to Query 191879: 4523.332696 from(1131.840450,4+) intensity(0.0000)

Title: File2475 Spectrum188372 scans: 16226

Data file \\192.168.1.105\public\File\_exchange\Wu Zhixiang\SIMM7721\_new\7721\2013-7-19-7721-Fr5, 6ZW.mgf

Click mouse within plot area to zoom in by factor of two about that point

Or,  to  Da

Label all possible matches  Label matches used for scoring

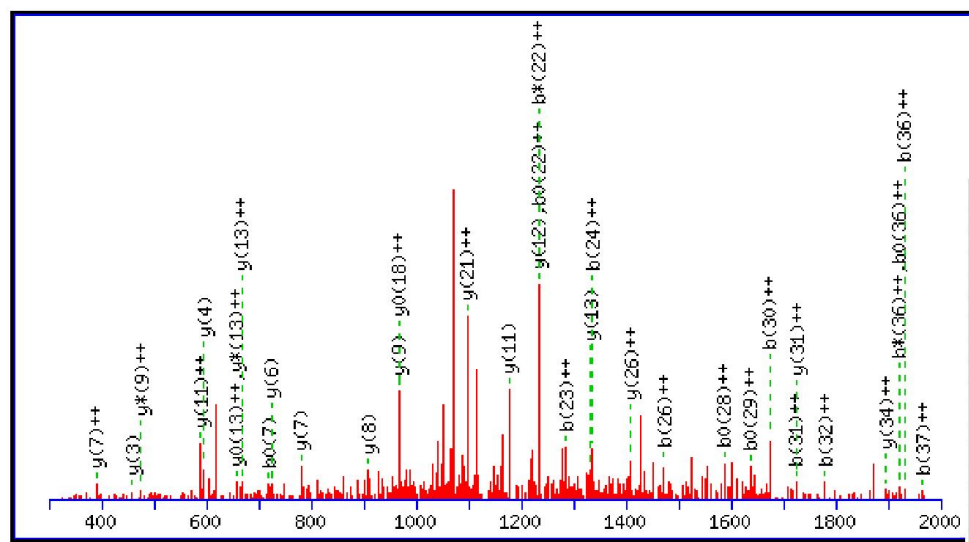

**Monoisotopic mass of neutral peptide Mr(calc): 4523.3606**  
**Fixed modifications:** Carbamidomethyl (C) (apply to specified residues or to all)  
**Variable modifications:**  
**M6** : Label:13C(1)2H(3) (M)  
**K14** : Propionyl (K)  
**K16** : Propionyl-(13CD3)Methyl (K)  
**K39** : Propionyl (K)  
**Ions Score: 43 Expect: 0.034**  
**Matches : 35/432 fragment ions using 51 most intense peaks** ([help](#))

| #  | b         | b <sup>++</sup> | b <sup>*</sup> | b <sup>++</sup> | b <sup>0</sup> | b <sup>0++</sup> | Seq | y         | y <sup>++</sup> | y <sup>*</sup> | y <sup>++</sup> | y <sup>0</sup> | y <sup>0++</sup> | #  |
|----|-----------|-----------------|----------------|-----------------|----------------|------------------|-----|-----------|-----------------|----------------|-----------------|----------------|------------------|----|
| 1  | 148.0757  | 74.5415         |                |                 |                |                  | F   |           |                 |                |                 |                |                  | 1  |
| 2  | 247.1441  | 124.0757        |                |                 |                |                  | V   | 4377.2994 | 2109.1533       | 4360.2729      | 2180.6401       | 4359.2888      | 2180.1461        | 40 |
| 3  | 344.1069  | 172.6021        |                |                 |                |                  | F   |           |                 |                |                 |                |                  | 39 |
| 4  | 415.2840  | 208.1208        |                |                 |                |                  | A   | 4181.1782 | 2091.0927       | 4184.1517      | 2082.5795       | 4183.1677      | 2082.0875        | 38 |
| 5  | 544.2766  | 272.6419        |                |                 | 526.2660       | 263.6396         | E   | 4110.1411 | 2055.5742       | 4093.1146      | 2047.0609       | 4092.1305      | 2046.5689        | 37 |
| 6  | 679.3362  | 340.1733        |                |                 | 661.3287       | 331.1690         | H   | 3981.0985 | 1991.0529       | 3964.0720      | 1982.5395       | 3953.0879      | 1982.0476        | 36 |
| 7  | 736.3807  | 368.6840        |                |                 | 718.3501       | 359.6787         | G   | 3845.0358 | 1923.5216       | 3829.0093      | 1915.0083       | 3828.0253      | 1914.5163        | 35 |
| 8  | 837.4084  | 419.2078        |                |                 | 819.3978       | 410.2025         | T   | 3789.0144 | 1895.0108       | 3771.9678      | 1888.4976       | 3771.0038      | 1886.0055        | 34 |
| 9  | 974.4873  | 487.7373        |                |                 | 956.4567       | 478.7320         | H   | 3687.9657 | 1844.4870       | 3670.9402      | 1835.9737       | 3659.9561      | 1835.4817        | 33 |
| 10 | 1075.5150 | 538.2611        |                |                 | 1057.5044      | 529.2558         | T   | 3550.9078 | 1775.9575       | 3533.8612      | 1767.4443       | 3532.8972      | 1766.9522        | 32 |
| 11 | 1174.5834 | 587.7953        |                |                 | 1156.5729      | 578.7901         | V   | 3449.8501 | 1725.4337       | 3432.8336      | 1716.9204       | 3431.8495      | 1716.4284        | 31 |
| 12 | 1261.6154 | 631.3113        |                |                 | 1243.6049      | 622.3051         | S   | 3350.7917 | 1675.9955       | 3333.7851      | 1667.3862       | 3332.7811      | 1666.8942        | 30 |
| 13 | 1360.6838 | 680.8458        |                |                 | 1342.6733      | 671.8403         | V   | 3263.7597 | 1632.3835       | 3246.7331      | 1623.8702       | 3245.7491      | 1623.3782        | 29 |
| 14 | 1544.8050 | 772.9061        | 1527.7785      | 764.3929        | 1526.7944      | 763.9009         | K   | 3164.6913 | 1582.8493       | 3147.6647      | 1574.3350       | 3148.6807      | 1573.8440        | 28 |
| 15 | 1707.8863 | 854.4378        | 1690.8418      | 845.9245        | 1689.8578      | 845.4325         | Y   | 2980.5701 | 1490.7887       | 2963.5435      | 1482.2754       | 2962.5595      | 1481.7834        | 27 |
| 16 | 1910.0274 | 955.5173        | 1893.0008      | 947.0040        | 1892.0168      | 946.5120         | K   | 2817.5087 | 1409.2570       | 2800.4802      | 1400.7437       | 2799.4982      | 1400.2517        | 26 |
| 17 | 1987.0466 | 984.0290        | 1950.0223      | 975.5148        | 1949.0383      | 975.0228         | G   | 2615.3477 | 1308.1775       | 2598.3212      | 1299.6642       | 2597.3372      | 1298.1722        | 25 |
| 18 | 2095.1074 | 1049.0573       | 2078.0606      | 1039.5441       | 2077.0969      | 1039.0521        | Q   | 2558.3263 | 1279.6668       | 2541.2997      | 1271.1535       | 2540.3157      | 1270.6615        | 24 |
| 19 | 2232.1863 | 1118.5868       | 2215.1398      | 1108.0735       | 2214.1557      | 1107.5815        | H   | 2430.2877 | 1215.6375       | 2413.2411      | 1207.1242       | 2412.2571      | 1206.6322        | 23 |
| 20 | 2331.2347 | 1168.1210       | 2314.2082      | 1157.6077       | 2313.2242      | 1157.1157        | V   | 2293.2088 | 1147.1080       | 2276.1822      | 1138.5948       | 2275.1982      | 1138.1027        | 22 |
| 21 | 2428.2875 | 1214.6474       | 2411.2609      | 1206.1341       | 2410.2769      | 1205.8421        | F   | 2194.1404 | 1097.5738       | 2177.1138      | 1089.0605       | 2178.1298      | 1088.5685        | 21 |
| 22 | 2495.3090 | 1243.1581       | 2498.2824      | 1234.6448       | 2467.2984      | 1234.1528        | G   | 2097.0976 | 1049.0474       | 2080.0611      | 1040.5342       | 2079.0770      | 1040.0422        | 20 |
| 23 | 2572.3410 | 1286.6744       | 2555.3144      | 1276.1609       | 2554.3304      | 1277.6696        | S   | 2040.0661 | 1020.5367       | 2023.0396      | 1012.0234       | 2022.0596      | 1011.5314        | 19 |
| 24 | 2659.3937 | 1335.2005       | 2652.3672      | 1326.6872       | 2651.3632      | 1326.1952        | F   | 1953.0341 | 977.0207        | 1936.0076      | 969.5074        | 1935.0235      | 968.0154         | 18 |
| 25 | 2816.4522 | 1408.7347       | 2799.4356      | 1400.2214       | 2798.4515      | 1399.7234        | F   | 1855.9813 | 928.4943        | 1838.9548      | 919.9810        | 1837.9708      | 919.4990         | 17 |
| 26 | 2944.5207 | 1472.7840       | 2927.4942      | 1464.2507       | 2926.5102      | 1463.7587        | Q   | 1708.9128 | 854.9801        | 1691.8664      | 846.4468        | 1690.9024      | 845.9548         | 16 |
| 27 | 3091.5941 | 1548.2982       | 3074.5628      | 1537.7849       | 3073.5785      | 1537.2929        | F   | 1580.8954 | 790.9308        | 1563.8278      | 782.4175        | 1562.8438      | 781.9255         | 15 |
| 28 | 3182.6368 | 1596.8221       | 3175.6103      | 1586.3089       | 3174.6263      | 1587.6166        | T   | 1433.7944 | 717.3966        | 1416.7594      | 708.8833        | 1415.7754      | 708.3913         | 14 |
| 29 | 3291.7052 | 1646.3563       | 3274.6787      | 1637.8430       | 3273.6947      | 1637.3510        | V   | 1332.7383 | 666.8728        | 1315.7117      | 659.3595        | 1314.7277      | 657.8675         | 13 |
| 30 | 3348.7267 | 1674.8670       | 3331.7002      | 1666.3537       | 3330.7161      | 1665.8617        | G   | 1233.6698 | 617.3386        | 1216.6433      | 608.8253        | 1215.6593      | 608.3333         | 12 |
| 31 | 3445.7795 | 1723.3934       | 3428.7529      | 1714.8801       | 3427.7689      | 1714.3881        | F   | 1178.6484 | 588.8278        | 1159.8218      | 580.3146        | 1158.8378      | 579.8225         | 11 |
| 32 | 3558.8835 | 1779.9354       | 3541.8370      | 1771.4221       | 3540.8530      | 1770.9301        | L   | 1079.5958 | 540.3014        | 1062.5891      | 531.7882        | 1061.5851      | 531.2982         | 10 |
| 33 | 3645.8850 | 1808.4461       | 3588.8584      | 1799.9329       | 3597.8744      | 1799.4406        | G   | 986.5116  | 483.7594        | 949.4850       | 475.2481        | 948.5010       | 474.7541         | 9  |
| 34 | 3744.9276 | 1872.9674       | 3727.9010      | 1864.4542       | 3726.9170      | 1863.9622        | G   | 909.4901  | 455.2497        | 892.4635       | 446.7354        | 891.4795       | 446.2434         | 8  |
| 35 | 3801.9491 | 1901.4792       | 3794.9225      | 1892.9649       | 3793.9385      | 1892.4729        | G   | 780.4475  | 390.7274        | 763.4209       | 382.2141        |                |                  | 7  |
| 36 | 3858.9705 | 1929.9889       | 3841.9440      | 1921.4758       | 3840.9600      | 1920.9836        | G   | 723.4260  | 362.2187        | 706.3095       | 353.7034        |                |                  | 6  |
| 37 | 3930.0076 | 1965.5075       | 3912.9811      | 1956.9942       | 3911.9971      | 1956.5022        | A   | 668.4048  | 333.7059        | 649.3780       | 325.1928        |                |                  | 5  |
| 38 | 4087.0685 | 2034.0369       | 4050.0400      | 2025.5238       | 4049.0560      | 2025.0316        | H   | 585.3875  | 298.1874        | 578.3408       | 289.8741        |                |                  | 4  |
| 39 | 4251.1977 | 2128.0975       | 4234.1612      | 2117.5842       | 4233.1772      | 2117.0922        | K   | 458.3085  | 229.6579        | 441.2620       | 221.1446        |                |                  | 3  |
| 40 | 4350.2561 | 2175.6317       | 4333.2296      | 2167.1184       | 4332.2455      | 2166.6294        | V   | 274.1974  | 137.5973        | 257.1609       | 129.0840        |                |                  | 2  |
| 41 |           |                 |                |                 |                |                  | R   | 175.1190  | 88.0631         | 158.0924       | 79.5498         |                |                  | 1  |

Match to Query 12347: 1777.001068 from(889.507810, 2+) intensity(600015.4375)

Title: File2140 Spectrum12734 scans: 13935

Data file I:\2013-12-03-SIMM7721-FR1-12-ZW.mgf

Click mouse within plot area to zoom in by factor of two about that point

Or,   to  Da Label all possible matches  Label matches used for scoring 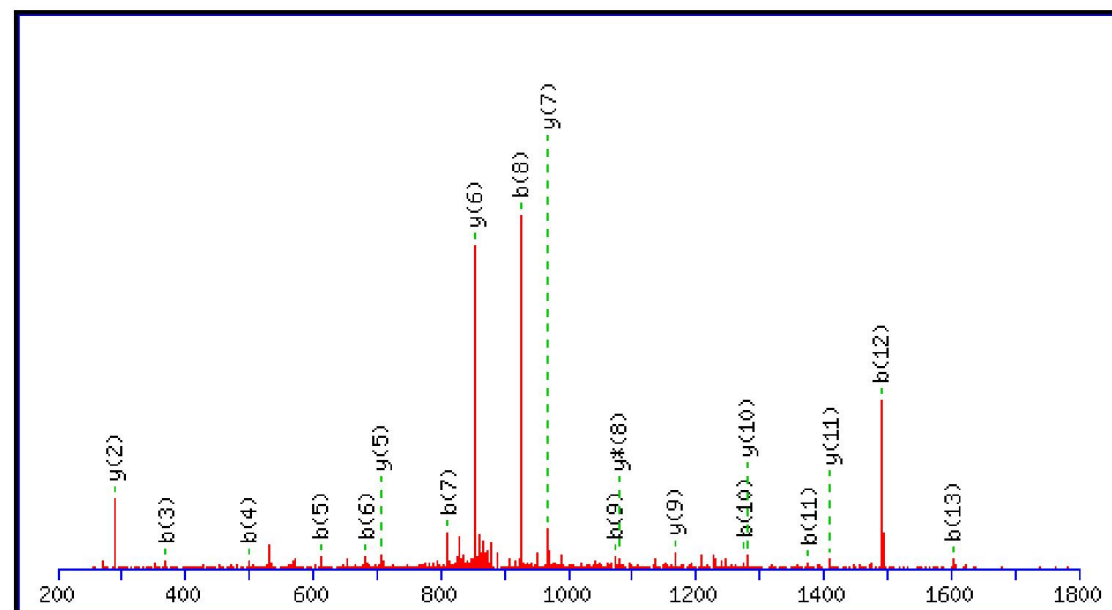Monoisotopic mass of neutral peptide  $M_r(\text{calc})$ : 1777.

Fixed modifications: Carbamidomethyl (C) (apply to spec:

Variable modifications:

**K10** : Propionyl-(13CD3)Methyl (K)

Ions Score: 79 Expect: 6.5e-006

Matches : 19/142 fragment ions using 31 most intense peak

| #  | b                    | b <sup>++</sup> | b <sup>+</sup> | b <sup>+</sup> + | b <sup>0</sup> | b <sup>0</sup> + | Seq. | y                | y <sup>++</sup> | y <sup>+</sup>   | y <sup>+</sup> + | y <sup>0</sup> | y <sup>0</sup> + | #  |
|----|----------------------|-----------------|----------------|------------------|----------------|------------------|------|------------------|-----------------|------------------|------------------|----------------|------------------|----|
| 1  | 114.0913             | 57.5493         |                |                  |                |                  | L    |                  |                 |                  |                  |                |                  | 14 |
| 2  | 213.1598             | 107.0835        |                |                  |                |                  | V    | 1664.9239        | 832.9656        | 1647.8973        | 824.4523         | 1646.9133      | 823.9603         | 13 |
| 3  | <del>369.2649</del>  | 185.1341        | 352.2343       | 176.6208         |                |                  | R    | 1565.8555        | 783.4314        | 1548.8289        | 774.9181         | 1547.8449      | 774.4261         | 12 |
| 4  | <del>498.3035</del>  | 249.6554        | 481.2769       | 241.1421         | 480.2929       | 240.6501         | B    | <b>1409.7544</b> | 705.3808        | 1392.7278        | 696.8675         | 1391.7438      | 696.3755         | 11 |
| 5  | <del>611.3875</del>  | 306.1974        | 594.3610       | 297.6941         | 593.3770       | 297.1921         | I    | <b>1280.7118</b> | 640.8595        | 1263.6852        | 632.3462         | 1262.7012      | 631.8542         | 10 |
| 6  | <del>682.4246</del>  | 341.7160        | 665.3981       | 333.2027         | 664.4141       | 332.7107         | A    | <b>1167.6277</b> | 584.3175        | 1150.6012        | 575.8042         | 1149.6171      | 575.3122         | 9  |
| 7  | <del>810.4832</del>  | 405.7452        | 793.4567       | 397.2320         | 792.4726       | 396.7400         | Q    | 1096.5906        | 548.7989        | <b>1079.5640</b> | 540.2857         | 1078.5800      | 539.7936         | 8  |
| 8  | <del>925.5102</del>  | 463.2587        | 908.4836       | 454.7454         | 907.4996       | 454.2534         | D    | <b>968.5320</b>  | 484.7696        | 951.5055         | 476.2564         | 950.5214       | 475.7644         | 7  |
| 9  | <del>1072.5786</del> | 536.7929        | 1055.5520      | 528.2796         | 1054.5680      | 527.7876         | F    | <b>853.5051</b>  | 427.2562        | 836.4785         | 418.7429         | 835.4945       | 418.2509         | 6  |
| 10 | <del>1274.7376</del> | 637.8724        | 1257.7110      | 629.3592         | 1256.7270      | 628.8671         | K    | <b>706.4367</b>  | 353.7220        | 689.4101         | 345.2087         | 688.4261       | 344.7167         | 5  |
| 11 | <del>1375.7853</del> | 688.3963        | 1358.7587      | 679.8830         | 1357.7747      | 679.3910         | T    | 504.2776         | 252.6425        | 487.2511         | 244.1292         | 486.2671       | 243.6372         | 4  |
| 12 | <del>1490.8122</del> | 745.9097        | 1473.7857      | 737.3965         | 1472.8016      | 736.9045         | D    | 403.2300         | 202.1186        | 386.2034         | 193.6053         | 385.2194       | 193.1133         | 3  |
| 13 | <del>1603.8963</del> | 802.4518        | 1586.8697      | 793.9385         | 1585.8857      | 793.4465         | L    | <b>288.2030</b>  | 144.6051        | 271.1765         | 136.0919         |                |                  | 2  |
| 14 |                      |                 |                |                  |                |                  | R    | 175.1190         | 88.0631         | 158.0924         | 79.5498          |                |                  | 1  |

Match to Query 1118: 833.487948 from(417.751250, 2+) intensity(336946.6563)

Title: File2140 Spectrum2369 scans: 3105

Data file I:\2013-12-03-SIMM7721-FR1-12-ZW.mgf

Click mouse within plot area to zoom in by factor of two about that point

Or,   to  DaLabel all possible matches  Label matches used for scoring 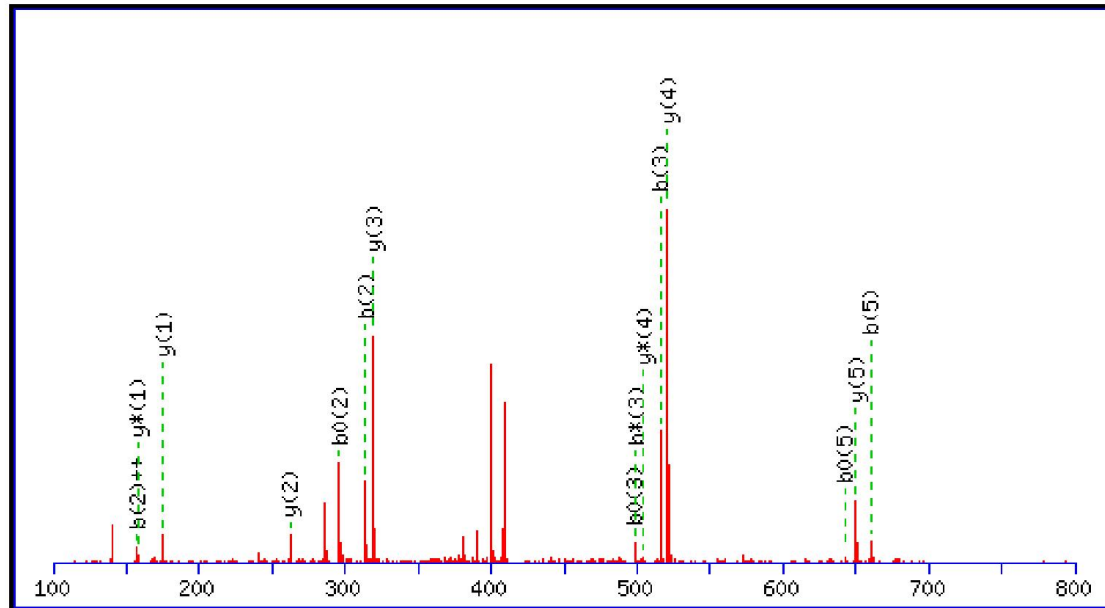**Monoisotopic mass of neutral peptide Mr(calc):** 833.4879**Fixed modifications:** Carbamidomethyl (C) (apply to specified residues or termini only)**Variable modifications:****K1** : Propionyl (K)**K3** : Propionyl-(13CD3)Methyl (K)**Ions Score:** 35 **Expect:** 0.098**Matches** : 15/56 fragment ions using 26 most intense peak

| # | b               | b <sup>++</sup> | b <sup>*</sup>  | b <sup>+++</sup> | b <sup>0</sup>  | b <sup>0++</sup> | Seq. | y               | y <sup>++</sup> | y <sup>*</sup>  | y <sup>+++</sup> | y <sup>0</sup> | y <sup>0++</sup> | # |
|---|-----------------|-----------------|-----------------|------------------|-----------------|------------------|------|-----------------|-----------------|-----------------|------------------|----------------|------------------|---|
| 1 | 185.1285        | 93.0679         | 168.1019        | 84.5546          |                 |                  | K    |                 |                 |                 |                  |                |                  | 6 |
| 2 | <b>314.1710</b> | <b>157.5892</b> | 297.1445        | 149.0759         | <b>296.1605</b> | 148.5839         | K    | <b>650.3741</b> | 325.6907        | 633.3475        | 317.1774         | 632.3635       | 316.6854         | 5 |
| 3 | <b>516.3301</b> | 258.6687        | <b>499.3035</b> | 250.1554         | <b>498.3195</b> | 249.6634         | K    | <b>521.3315</b> | 261.1694        | <b>504.3049</b> | 252.6561         | 503.3209       | 252.1641         | 4 |
| 4 | 573.3515        | 287.1794        | 556.3250        | 278.6661         | 555.3410        | 278.1741         | G    | <b>319.1724</b> | 160.0899        | 302.1459        | 151.5766         | 301.1619       | 151.0846         | 3 |
| 5 | <b>660.3836</b> | 330.6954        | 643.3570        | 322.1821         | <b>642.3730</b> | 321.6901         | S    | <b>262.1510</b> | 131.5791        | 245.1244        | 123.0659         | 244.1404       | 122.5738         | 2 |
| 6 |                 |                 |                 |                  |                 |                  | R    | <b>175.1190</b> | 88.0631         | <b>158.0924</b> | 79.5498          |                |                  | 1 |

MS/MS Fragmentation of **LLKCKR**Found in **P17568|NDUB7\_HUMAN** in **Uniprot\_Human**, NADH dehydrogenase [ubiquinone] 1 beta subcomplex subunit 7 OS=Homo sapiens GN=NDUFB7 PE=1 SV=4

Match to Query 2324: 942.567908 from(472.291230,2+) intensity(57368.6758) rtinseconds(1352) scans(8425) index(7488)

Title: File1029 Spectrum7615 scans: 8425

Data file 2013-7-21-liver-Ca-Fr7,8-ZW.mgf

Click mouse within plot area to zoom in by factor of two about that point

Or, Plot from  to  Da Label all possible matches  Label matches used for scoring Show Y-axis 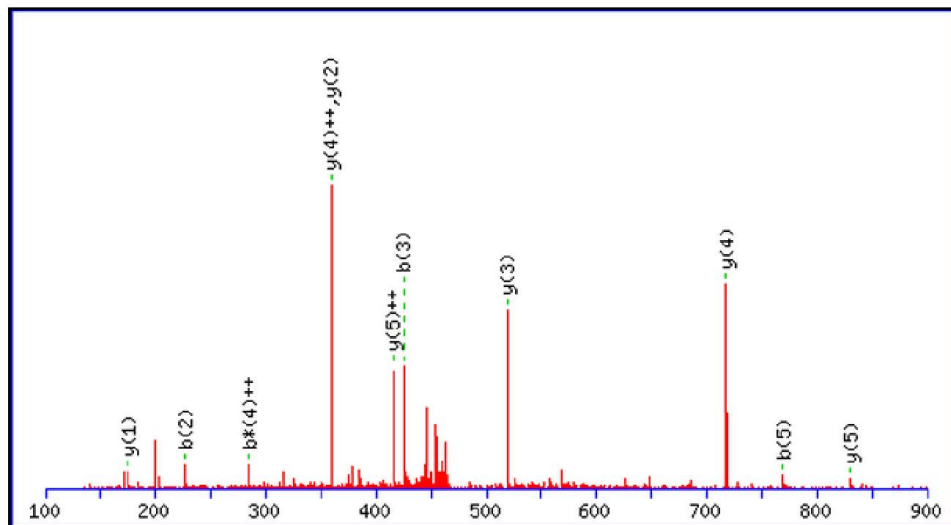

Monoisotopic mass of neutral peptide Mr(calc) : 942.5684

Fixed modifications: Carbamidom

Variable modifications:

K3 : Propionyl-Methylation

K5 : Propionyl (K)

Ions Score: 26 Expect: 0.94

Matches : 11/36 fragment ions u

| # | b               | b <sup>++</sup> | b <sup>*</sup> | b <sup>*++</sup> | Seq. | y               | y <sup>++</sup> | y <sup>*</sup> | y <sup>*++</sup> | # |
|---|-----------------|-----------------|----------------|------------------|------|-----------------|-----------------|----------------|------------------|---|
| 1 | 114.0913        | 57.5493         |                |                  | L    |                 |                 |                |                  | 6 |
| 2 | <b>227.1754</b> | 114.0913        |                |                  | L    | <b>830.4917</b> | <b>415.7495</b> | 813.4651       | 407.2362         | 5 |
| 3 | <b>425.3122</b> | 213.1598        | 408.2857       | 204.6465         | K    | <b>717.4076</b> | <b>359.2074</b> | 700.3811       | 350.6942         | 4 |
| 4 | 585.3429        | 293.1751        | 568.3163       | <b>284.6618</b>  | C    | <b>519.2708</b> | 260.1390        | 502.2442       | 251.6258         | 3 |
| 5 | <b>769.4641</b> | 385.2357        | 752.4375       | 376.7224         | K    | <b>359.2401</b> | 180.1237        | 342.2136       | 171.6104         | 2 |
| 6 |                 |                 |                |                  | R    | <b>175.1190</b> | 88.0631         | 158.0924       | 79.5498          | 1 |

MS/MS Fragmentation of **NRYVKVPR**

Found in **C9JQE1|C9JQE1\_HUMAN** in **Uniprot\_Human**, Mitochondrial inner membrane protease subunit 2 OS=Homo sapiens GN=IMMP2L PE=2 SV=1

Match to Query 4410: 1100.635708 from(551.325130,2+) intensity(18755.7891) rtinseconds(1395) scans(8723) index(7755)

406

Title: File1029 Spectrum7895 scans: 8723

Data file 2013-7-21-liver-Ca-Fr7,8-ZW.mgf

Click mouse within plot area to zoom in by factor of two about that point

Or, Plot from  to  Da

Label all possible matches  Label matches used for scoring

Show Y-axis

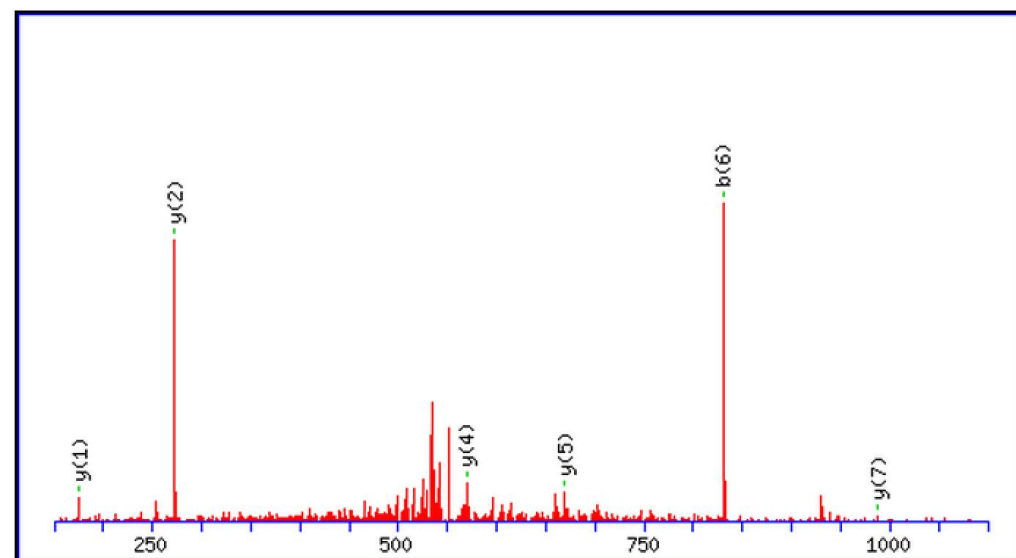

Monoisotopic mass of neutral peptide Mr(calc): 11

Fixed modifications: Carbamidomethyl (C) (apply t

Variable modifications:

K5 : Propionyl-Methylation (K)

Ions Score: 31 Expect: 0.39

Matches : 6/56 fragment ions using 10 most intens

| # | b        | b <sup>++</sup> | b*       | b <sup>*++</sup> | Seq. | y        | y <sup>++</sup> | y*       | y <sup>*++</sup> | # |
|---|----------|-----------------|----------|------------------|------|----------|-----------------|----------|------------------|---|
| 1 | 115.0502 | 58.0287         | 98.0237  | 49.5155          | N    |          |                 |          |                  | 8 |
| 2 | 271.1513 | 136.0793        | 254.1248 | 127.5660         | R    | 987.6098 | 494.3085        | 970.5833 | 485.7953         | 7 |
| 3 | 434.2146 | 217.6110        | 417.1881 | 209.0977         | Y    | 831.5087 | 416.2580        | 814.4822 | 407.7447         | 6 |
| 4 | 533.2831 | 267.1452        | 516.2565 | 258.6319         | V    | 668.4454 | 334.7263        | 651.4188 | 326.2130         | 5 |
| 5 | 731.4199 | 366.2136        | 714.3933 | 357.7003         | K    | 569.3770 | 285.1921        | 552.3504 | 276.6788         | 4 |
| 6 | 830.4883 | 415.7478        | 813.4618 | 407.2345         | V    | 371.2401 | 186.1237        | 354.2136 | 177.6104         | 3 |
| 7 | 927.5411 | 464.2742        | 910.5145 | 455.7609         | P    | 272.1717 | 136.5895        | 255.1452 | 128.0762         | 2 |
| 8 |          |                 |          |                  | R    | 175.1190 | 88.0631         | 158.0924 | 79.5498          | 1 |

Match to Query 5947: 1251.672088 from(626.843320,2+) intensity(31733.7090) rtinseconds(1386) scans(6589) index(5577)

Title: File969 Spectrum5592 scans: 6589

Data file 2013-7-18-liver-Ca-Fr9,10-ZW.mgf

Click mouse within plot area to zoom in by factor of two about that point

Or, Plot from  to  Da Label all possible matches  Label matches used for scoring Show Y-axis 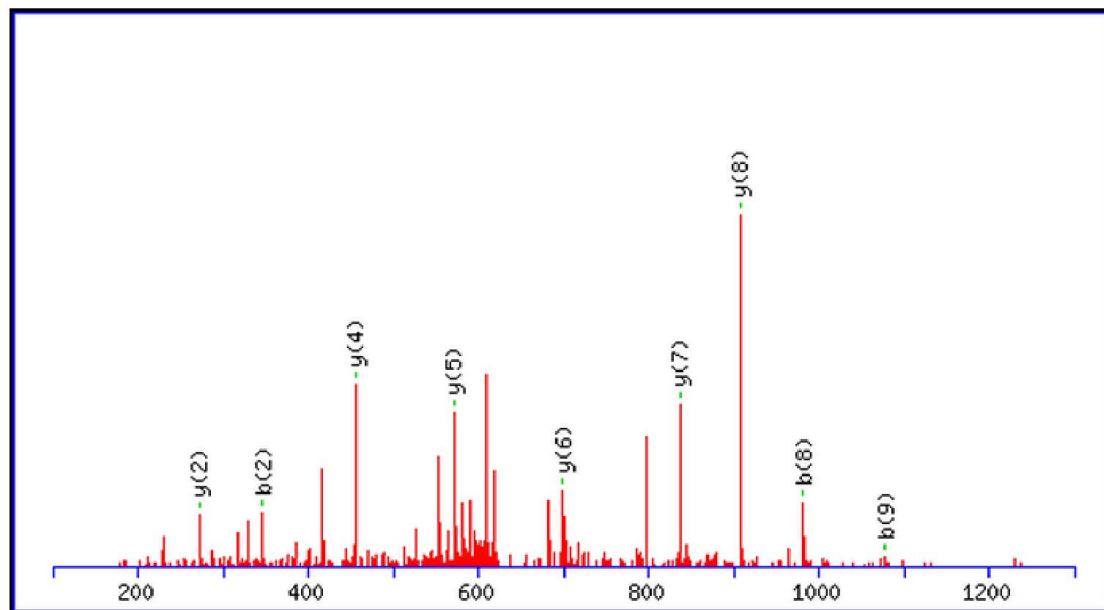

Monoisotopic mass of neutral peptide Mr(calc):

Fixed modifications: Carbamidomethyl (C) (applied)

Variable modifications:

K2 : Propionyl-Methylation (K)

Ions Score: 54 Expect: 0.0013

Matches : 9/88 fragment ions using 11 most intense

| #  | b                | b <sup>++</sup> | b*        | b <sup>+++</sup> | b <sup>0</sup> | b <sup>0++</sup> | Seq. | y               | y <sup>++</sup> | y*        | y <sup>+++</sup> | y <sup>0</sup> | y <sup>0++</sup> | #  |
|----|------------------|-----------------|-----------|------------------|----------------|------------------|------|-----------------|-----------------|-----------|------------------|----------------|------------------|----|
| 1  | 148.0757         | 74.5415         |           |                  |                |                  | F    |                 |                 |           |                  |                |                  | 10 |
| 2  | <b>346.2125</b>  | 173.6099        | 329.1860  | 165.0966         |                |                  | K    | 1105.6113       | 553.3093        | 1088.5847 | 544.7960         | 1087.6007      | 544.3040         | 9  |
| 3  | 417.2496         | 209.1285        | 400.2231  | 200.6152         |                |                  | A    | <b>907.4744</b> | 454.2409        | 890.4479  | 445.7276         | 889.4639       | 445.2356         | 8  |
| 4  | 554.3085         | 277.6579        | 537.2820  | 269.1446         |                |                  | H    | <b>836.4373</b> | 418.7223        | 819.4108  | 410.2090         | 818.4268       | 409.7170         | 7  |
| 5  | 682.3671         | 341.6872        | 665.3406  | 333.1739         |                |                  | Q    | <b>699.3784</b> | 350.1928        | 682.3519  | 341.6796         | 681.3678       | 341.1876         | 6  |
| 6  | 797.3941         | 399.2007        | 780.3675  | 390.6874         | 779.3835       | 390.1954         | D    | <b>571.3198</b> | 286.1636        | 554.2933  | 277.6503         | 553.3093       | 277.1583         | 5  |
| 7  | 868.4312         | 434.7192        | 851.4046  | 426.2060         | 850.4206       | 425.7139         | A    | <b>456.2929</b> | 228.6501        | 439.2663  | 220.1368         |                |                  | 4  |
| 8  | <b>981.5152</b>  | 491.2613        | 964.4887  | 482.7480         | 963.5047       | 482.2560         | L    | 385.2558        | 193.1315        | 368.2292  | 184.6183         |                |                  | 3  |
| 9  | <b>1078.5680</b> | 539.7876        | 1061.5415 | 531.2744         | 1060.5574      | 530.7824         | P    | <b>272.1717</b> | 136.5895        | 255.1452  | 128.0762         |                |                  | 2  |
| 10 |                  |                 |           |                  |                |                  | R    | 175.1190        | 88.0631         | 158.0924  | 79.5498          |                |                  | 1  |

Match to Query 2492: 1023.609468 from(512.812010,2+) intensity(40682.7891) rtinseconds(1510) scans(7416) index(6342)

408

Title: File969 Spectrum6358 scans: 7416

Data file 2013-7-18-liver-Ca-Fr9,10-ZW.mgf

Click mouse within plot area to zoom in by factor of two about that point

Or,  100  1000 Da Label all possible matches  Label matches used for scoring Show Y-axis 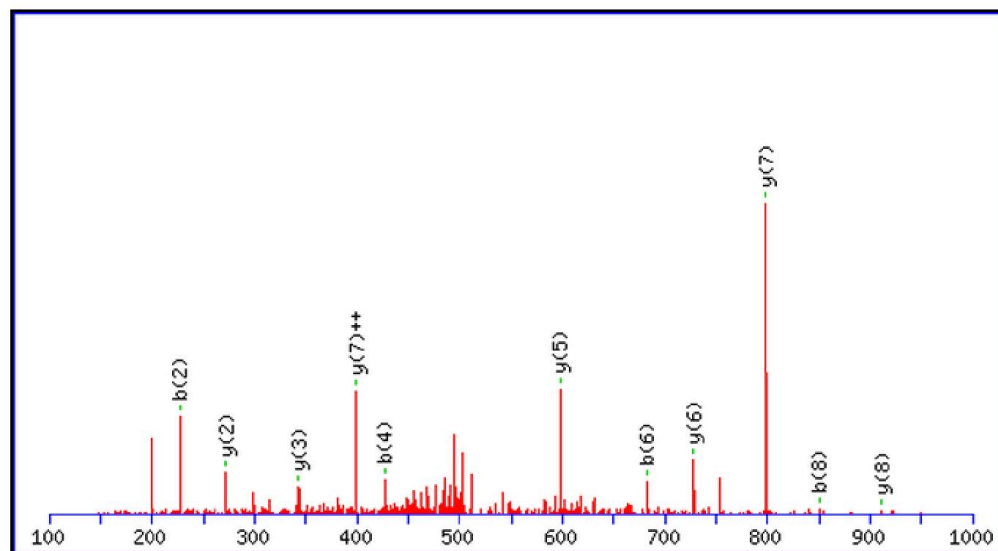

Monoisotopic mass of neutral peptide Mr(calc): 1023.6077

Fixed modifications: Carbamidomethyl (C) (apply to specified residues or termini only)

Variable modifications:

K6 : Propionyl-Methylation (K)

Ions Score: 46 Expect: 0.0035

Matches : 11/70 fragment ions using 1

| # | b               | b <sup>++</sup> | b <sup>*</sup> | b <sup>*++</sup> | b <sup>0</sup> | b <sup>0++</sup> | Seq. | y               | y <sup>++</sup> | y <sup>*</sup> | y <sup>*++</sup> | y <sup>0</sup> | y <sup>0++</sup> | # |
|---|-----------------|-----------------|----------------|------------------|----------------|------------------|------|-----------------|-----------------|----------------|------------------|----------------|------------------|---|
| 1 | 114.0913        | 57.5493         |                |                  |                |                  | L    |                 |                 |                |                  |                |                  | 9 |
| 2 | <b>227.1754</b> | 114.0913        |                |                  |                |                  | I    | <b>911.5309</b> | 456.2691        | 894.5043       | 447.7558         | 893.5203       | 447.2638         | 8 |
| 3 | 298.2125        | 149.6099        |                |                  |                |                  | A    | <b>798.4468</b> | <b>399.7271</b> | 781.4203       | 391.2138         | 780.4363       | 390.7218         | 7 |
| 4 | <b>427.2551</b> | 214.1312        |                |                  | 409.2445       | 205.1259         | E    | <b>727.4097</b> | 364.2085        | 710.3832       | 355.6952         | 709.3992       | 355.2032         | 6 |
| 5 | 484.2766        | 242.6419        |                |                  | 466.2660       | 233.6366         | G    | <b>598.3671</b> | 299.6872        | 581.3406       | 291.1739         |                |                  | 5 |
| 6 | <b>682.4134</b> | 341.7103        | 665.3869       | 333.1971         | 664.4028       | 332.7051         | K    | 541.3457        | 271.1765        | 524.3191       | 262.6632         |                |                  | 4 |
| 7 | 753.4505        | 377.2289        | 736.4240       | 368.7156         | 735.4400       | 368.2236         | A    | <b>343.2088</b> | 172.1081        | 326.1823       | 163.5948         |                |                  | 3 |
| 8 | <b>850.5033</b> | 425.7553        | 833.4767       | 417.2420         | 832.4927       | 416.7500         | P    | <b>272.1717</b> | 136.5895        | 255.1452       | 128.0762         |                |                  | 2 |
| 9 |                 |                 |                |                  |                |                  | R    | 175.1190        | 88.0631         | 158.0924       | 79.5498          |                |                  | 1 |



Match to Query 3765: 1092.555888 from(547.285220,2+) intensity(179640.7813) rtinseconds(2030) scans(11483) index(10208)

Title: File973 Spectrum10235 scans: 11483

Data file 2013-7-21-liver-Ca-Fr19,20-ZW.mgf

Click mouse within plot area to zoom in by factor of two about that point

Or,  150 to  Da Label all possible matches  Label matches used for scoring Show Y-axis 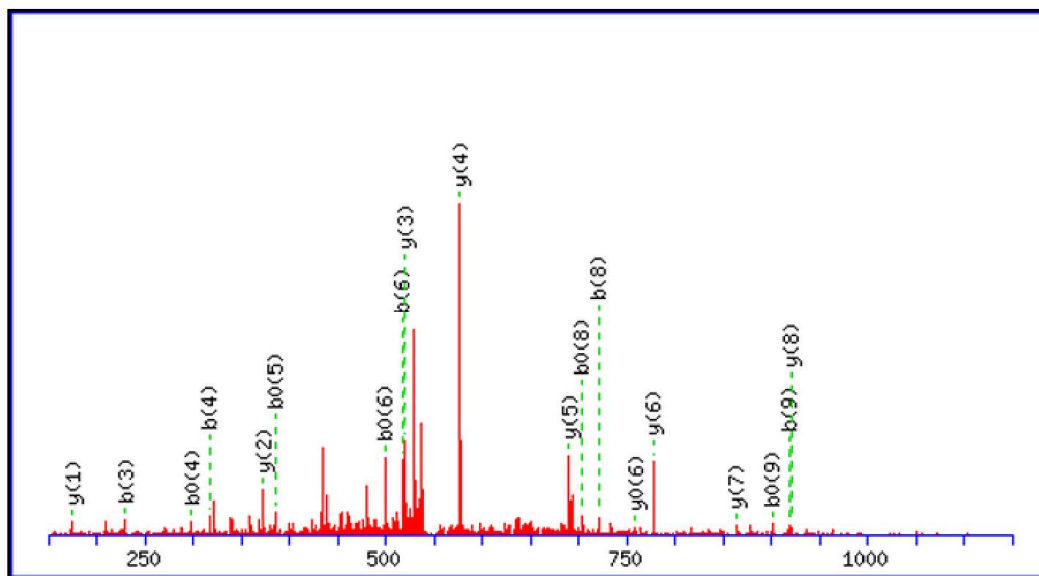

Monoisotopic mass of neutral pept:

Fixed modifications: Carbamidomethyl

Variable modifications:

K9 : Propionyl-Methylation (K)

Ions Score: 39 Expect: 0.033

Matches : 19/82 fragment ions used

| #  | b               | b <sup>++</sup> | b <sup>*</sup> | b <sup>*++</sup> | b <sup>0</sup>  | b <sup>0++</sup> | Seq. | y               | y <sup>++</sup> | y <sup>*</sup> | y <sup>*++</sup> | y <sup>0</sup>  | y <sup>0++</sup> | #  |
|----|-----------------|-----------------|----------------|------------------|-----------------|------------------|------|-----------------|-----------------|----------------|------------------|-----------------|------------------|----|
| 1  | 116.0342        | 58.5207         |                |                  | 98.0237         | 49.5155          | D    |                 |                 |                |                  |                 |                  | 10 |
| 2  | 173.0557        | 87.0315         |                |                  | 155.0451        | 78.0262          | G    | 978.5367        | 489.7720        | 961.5102       | 481.2587         | 960.5261        | 480.7667         | 9  |
| 3  | <b>230.0771</b> | 115.5422        |                |                  | 212.0666        | 106.5369         | G    | <b>921.5152</b> | 461.2613        | 904.4887       | 452.7480         | 903.5047        | 452.2560         | 8  |
| 4  | <b>317.1092</b> | 159.0582        |                |                  | <b>299.0986</b> | 150.0529         | S    | <b>864.4938</b> | 432.7505        | 847.4672       | 424.2373         | 846.4832        | 423.7452         | 7  |
| 5  | 404.1412        | 202.5742        |                |                  | <b>386.1306</b> | 193.5690         | S    | <b>777.4618</b> | 389.2345        | 760.4352       | 380.7212         | <b>759.4512</b> | 380.2292         | 6  |
| 6  | <b>517.2253</b> | 259.1163        |                |                  | <b>499.2147</b> | 250.1110         | L    | <b>690.4297</b> | 345.7185        | 673.4032       | 337.2052         |                 |                  | 5  |
| 7  | 574.2467        | 287.6270        |                |                  | 556.2362        | 278.6217         | G    | <b>577.3457</b> | 289.1765        | 560.3191       | 280.6632         |                 |                  | 4  |
| 8  | <b>721.3151</b> | 361.1612        |                |                  | <b>703.3046</b> | 352.1559         | F    | <b>520.3242</b> | 260.6657        | 503.2976       | 252.1525         |                 |                  | 3  |
| 9  | <b>919.4520</b> | 460.2296        | 902.4254       | 451.7164         | <b>901.4414</b> | 451.2243         | K    | <b>373.2558</b> | 187.1315        | 356.2292       | 178.6183         |                 |                  | 2  |
| 10 |                 |                 |                |                  |                 |                  | R    | <b>175.1190</b> | 88.0631         | 158.0924       | 79.5498          |                 |                  | 1  |

Match to Query 13326: 1776.954328 from(889.484440,2+) intensity(133526.0625) rtinseconds(3649) scans(23129) index(20952)

Title: File973 Spectrum21095 scans: 23129

Data file 2013-7-21-liver-Ca-Fr19,20-ZW.mgf

Click mouse within plot area to zoom in by factor of two about that point

Or,   to  Da Label all possible matches  Label matches used for scoring Show Y-axis 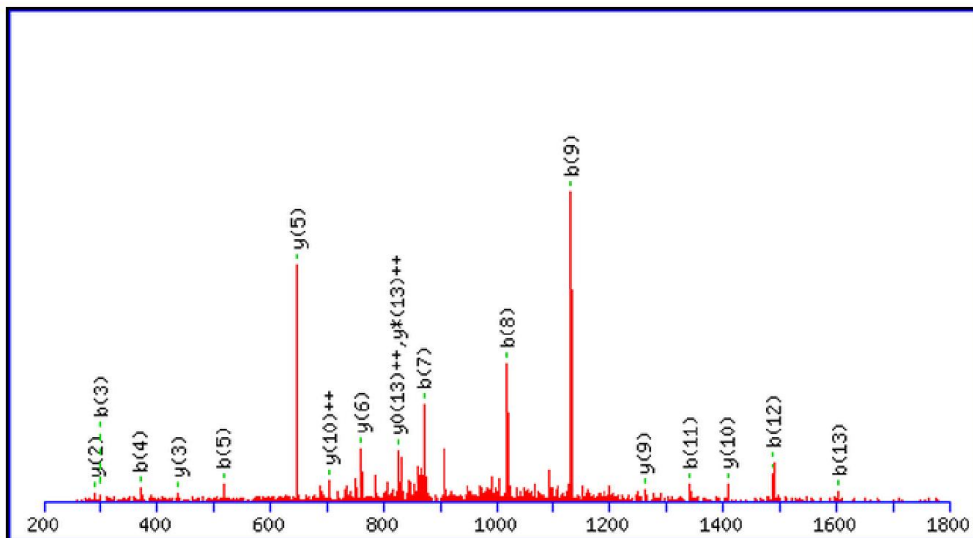

Monoisotopic mass of neutral peptide Mr(calc): 1

Fixed modifications: Carbamidomethyl (C) (apply

Variable modifications:

N-term : Acetyl (Protein N-term)

K7 : Propionyl-Methylation (K)

Ions Score: 51 Expect: 0.004

Matches : 18/126 fragment ions using 32 most int

| #  | b         | b <sup>++</sup> | b <sup>*</sup> | b <sup>*++</sup> | b <sup>0</sup> | b <sup>0++</sup> | Seq. | y         | y <sup>++</sup> | y <sup>*</sup> | y <sup>*++</sup> | y <sup>0</sup> | y <sup>0++</sup> | #  |
|----|-----------|-----------------|----------------|------------------|----------------|------------------|------|-----------|-----------------|----------------|------------------|----------------|------------------|----|
| 1  | 114.0550  | 57.5311         |                |                  |                |                  | A    |           |                 |                |                  |                |                  | 14 |
| 2  | 171.0764  | 86.0418         |                |                  |                |                  | G    | 1664.9271 | 832.9672        | 1647.9006      | 824.4539         | 1646.9166      | 823.9619         | 13 |
| 3  | 299.1350  | 150.0711        | 282.1084       | 141.5579         |                |                  | Q    | 1607.9057 | 804.4565        | 1590.8791      | 795.9432         | 1589.8951      | 795.4512         | 12 |
| 4  | 370.1721  | 185.5897        | 353.1456       | 177.0764         |                |                  | A    | 1479.8471 | 740.4272        | 1462.8205      | 731.9139         | 1461.8365      | 731.4219         | 11 |
| 5  | 517.2405  | 259.1239        | 500.2140       | 250.6106         |                |                  | F    | 1408.8100 | 704.9086        | 1391.7834      | 696.3953         | 1390.7994      | 695.9033         | 10 |
| 6  | 673.3416  | 337.1745        | 656.3151       | 328.6612         |                |                  | R    | 1261.7416 | 631.3744        | 1244.7150      | 622.8611         | 1243.7310      | 622.3691         | 9  |
| 7  | 871.4785  | 436.2429        | 854.4519       | 427.7296         |                |                  | K    | 1105.6404 | 553.3239        | 1088.6139      | 544.8106         | 1087.6299      | 544.3186         | 8  |
| 8  | 1018.5469 | 509.7771        | 1001.5203      | 501.2638         |                |                  | F    | 907.5036  | 454.2554        | 890.4771       | 445.7422         | 889.4930       | 445.2502         | 7  |
| 9  | 1131.6309 | 566.3191        | 1114.6044      | 557.8058         |                |                  | L    | 760.4352  | 380.7212        | 743.4087       | 372.2080         | 742.4246       | 371.7160         | 6  |
| 10 | 1228.6837 | 614.8455        | 1211.6572      | 606.3322         |                |                  | P    | 647.3511  | 324.1792        | 630.3246       | 315.6659         | 629.3406       | 315.1739         | 5  |
| 11 | 1341.7678 | 671.3875        | 1324.7412      | 662.8742         |                |                  | L    | 550.2984  | 275.6528        | 533.2718       | 267.1396         | 532.2878       | 266.6475         | 4  |
| 12 | 1488.8362 | 744.9217        | 1471.8096      | 736.4085         |                |                  | F    | 437.2143  | 219.1108        | 420.1878       | 210.5975         | 419.2037       | 210.1055         | 3  |
| 13 | 1603.8631 | 802.4352        | 1586.8366      | 793.9219         | 1585.8526      | 793.4299         | D    | 290.1459  | 145.5766        | 273.1193       | 137.0633         | 272.1353       | 136.5713         | 2  |
| 14 |           |                 |                |                  |                |                  | R    | 175.1190  | 88.0631         | 158.0924       | 79.5498          |                |                  | 1  |

Match to Query 12908: 1581.849588 from(791.932070,2+) intensity(69950.4141) rtinseconds(1271) scans(7048) index(6197)

Title: File1025 Spectrum6211 scans: 7048

Data file 2013-7-21-liver-Ca-Fr17,18-ZW.mgf

Click mouse within plot area to zoom in by factor of two about that point

Or,  200  1600  Label all possible matches  Label matches used for scoring Show Y-axis 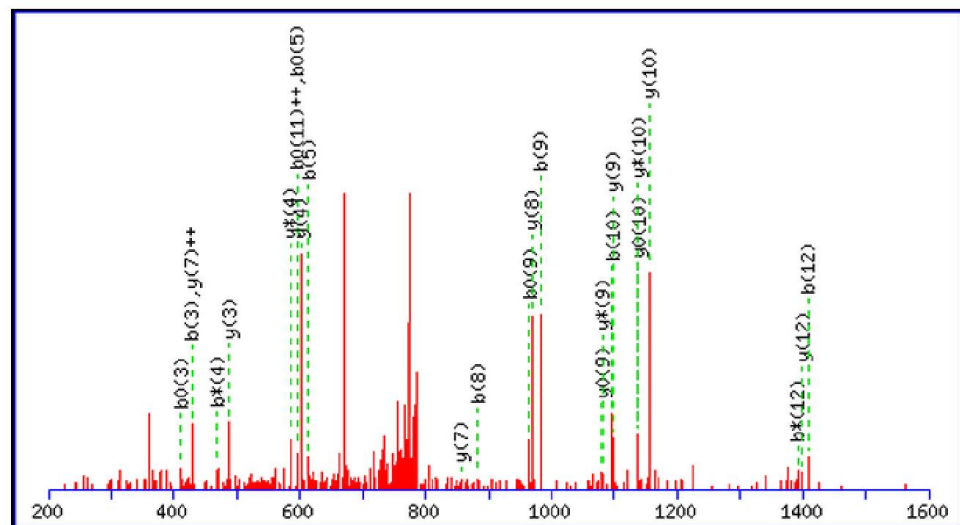

Monoisotopic mass of neutral peptide Mr(calc): 1581.8587

Fixed modifications: Carbamidomethyl (C) (applied)

Variable modifications:

N-term : Propionyl-Methylation (Protein N-term)

K12 : Propionyl-Methylation (K)

Ions Score: 26 Expect: 0.89

Matches : 25/126 fragment ions using 61 most i

| #  | b                | b <sup>++</sup> | b <sup>*</sup>   | b <sup>*++</sup> | b <sup>0</sup>  | b <sup>0++</sup> | Seq. | y                | y <sup>++</sup> | y <sup>*</sup>   | y <sup>*++</sup> | y <sup>0</sup>   | y <sup>0++</sup> | #  |
|----|------------------|-----------------|------------------|------------------|-----------------|------------------|------|------------------|-----------------|------------------|------------------|------------------|------------------|----|
| 1  | 185.0921         | 93.0497         | 168.0655         | 84.5364          |                 |                  | N    |                  |                 |                  |                  |                  |                  | 13 |
| 2  | 272.1241         | 136.5657        | 255.0975         | 128.0524         | 254.1135        | 127.5604         | S    | <b>1398.7812</b> | 699.8942        | 1381.7546        | 691.3810         | 1380.7706        | 690.8889         | 12 |
| 3  | <b>428.2252</b>  | 214.6162        | 411.1987         | 206.1030         | <b>410.2146</b> | 205.6110         | R    | 1311.7492        | 656.3782        | 1294.7226        | 647.8649         | 1293.7386        | 647.3729         | 11 |
| 4  | 485.2467         | 243.1270        | <b>468.2201</b>  | 234.6137         | 467.2361        | 234.1217         | G    | <b>1155.6480</b> | 578.3277        | <b>1138.6215</b> | 569.8144         | <b>1137.6375</b> | 569.3224         | 10 |
| 5  | <b>614.2893</b>  | 307.6483        | 597.2627         | 299.1350         | <b>596.2787</b> | 298.6430         | E    | <b>1098.6266</b> | 549.8169        | <b>1081.6000</b> | 541.3037         | <b>1080.6160</b> | 540.8116         | 9  |
| 6  | 727.3733         | 364.1903        | 710.3468         | 355.6770         | 709.3628        | 355.1850         | L    | <b>969.5840</b>  | 485.2956        | 952.5574         | 476.7824         |                  |                  | 8  |
| 7  | 826.4417         | 413.7245        | 809.4152         | 405.2112         | 808.4312        | 404.7192         | V    | <b>856.4999</b>  | <b>428.7536</b> | 839.4734         | 420.2403         |                  |                  | 7  |
| 8  | <b>883.4632</b>  | 442.2352        | 866.4367         | 433.7220         | 865.4526        | 433.2300         | G    | 757.4315         | 379.2194        | 740.4050         | 370.7061         |                  |                  | 6  |
| 9  | <b>982.5316</b>  | 491.7694        | 965.5051         | 483.2562         | <b>964.5211</b> | 482.7642         | V    | 700.4100         | 350.7087        | 683.3835         | 342.1954         |                  |                  | 5  |
| 10 | <b>1096.5745</b> | 548.7909        | 1079.5480        | 540.2776         | 1078.5640       | 539.7856         | N    | <b>601.3416</b>  | 301.1745        | <b>584.3151</b>  | 292.6612         |                  |                  | 4  |
| 11 | 1210.6175        | 605.8124        | 1193.5909        | 597.2991         | 1192.6069       | <b>596.8071</b>  | N    | <b>487.2987</b>  | 244.1530        | 470.2722         | 235.6397         |                  |                  | 3  |
| 12 | <b>1408.7543</b> | 704.8808        | <b>1391.7278</b> | 696.3675         | 1390.7437       | 695.8755         | K    | 373.2558         | 187.1315        | 356.2292         | 178.6183         |                  |                  | 2  |
| 13 |                  |                 |                  |                  |                 |                  | R    | 175.1190         | 88.0631         | 158.0924         | 79.5498          |                  |                  | 1  |

Match to Query 6904: 1186.636448 from(594.325500,2+) intensity(50878.4375) rtinseconds(1488) scans(8592) index(7632)

Title: File1025 Spectrum7655 scans: 8592

Data file 2013-7-21-liver-Ca-Fr17,18-ZW.mgf

Click mouse within plot area to zoom in by factor of two about that point

Or, Plot from  to  Da Label all possible matches  Label matches used for scoring Show Y-axis 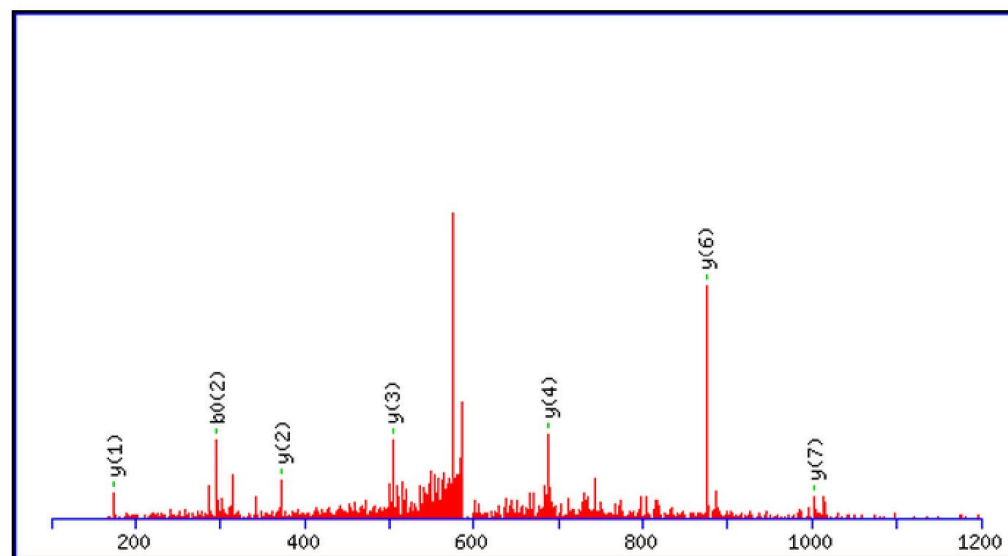

Monoisotopic mass of neutral peptide Mr(calc): 1186.6380

Fixed modifications: Carbamidomethyl (C) (apply to specified residues or termini only)

Variable modifications:

K1 : Propionyl (K)

K5 : Propionyl (K)

K7 : Propionyl-Methyl (K)

Ions Score: 39 Expect: 1

Matches : 7/74 fragment :

| # | b         | b <sup>++</sup> | b <sup>*</sup> | b <sup>*++</sup> | b <sup>0</sup> | b <sup>0++</sup> | Seq.     | y                | y <sup>++</sup> | y <sup>*</sup> | y <sup>*++</sup> | y <sup>0</sup> | y <sup>0++</sup> | #        |
|---|-----------|-----------------|----------------|------------------|----------------|------------------|----------|------------------|-----------------|----------------|------------------|----------------|------------------|----------|
| 1 | 185.1285  | 93.0679         | 168.1019       | 84.5546          |                |                  | <b>K</b> |                  |                 |                |                  |                |                  | <b>8</b> |
| 2 | 314.1710  | 157.5892        | 297.1445       | 149.0759         | 296.1605       | 148.5839         | <b>E</b> | <b>1003.5241</b> | 502.2657        | 986.4975       | 493.7524         | 985.5135       | 493.2604         | <b>7</b> |
| 3 | 371.1925  | 186.0999        | 354.1660       | 177.5866         | 353.1819       | 177.0946         | <b>G</b> | <b>874.4815</b>  | 437.7444        | 857.4550       | 429.2311         | 856.4709       | 428.7391         | <b>6</b> |
| 4 | 500.2351  | 250.6212        | 483.2086       | 242.1079         | 482.2245       | 241.6159         | <b>E</b> | 817.4600         | 409.2337        | 800.4335       | 400.7204         | 799.4495       | 400.2284         | <b>5</b> |
| 5 | 684.3563  | 342.6818        | 667.3297       | 334.1685         | 666.3457       | 333.6765         | <b>K</b> | <b>688.4174</b>  | 344.7124        | 671.3909       | 336.1991         |                |                  | <b>4</b> |
| 6 | 815.3968  | 408.2020        | 798.3702       | 399.6887         | 797.3862       | 399.1967         | <b>M</b> | <b>504.2963</b>  | 252.6518        | 487.2697       | 244.1385         |                |                  | <b>3</b> |
| 7 | 1013.5336 | 507.2704        | 996.5070       | 498.7572         | 995.5230       | 498.2652         | <b>K</b> | <b>373.2558</b>  | 187.1315        | 356.2292       | 178.6183         |                |                  | <b>2</b> |
| 8 |           |                 |                |                  |                |                  | <b>R</b> | <b>175.1190</b>  | 88.0631         | 158.0924       | 79.5498          |                |                  | <b>1</b> |

Match to Query 4814: 1083.608368 from(542.811460,2+) intensity(212965.7344) rtinseconds(2398) scans(15090) index(13709)

Title: File1025 Spectrum13732 scans: 15090

Data file 2013-7-21-liver-Ca-Fr17,18-ZW.mgf

Click mouse within plot area to zoom in by factor of two about that point

Or,  150  1050  Label all possible matches  Label matches used for scoring Show Y-axis 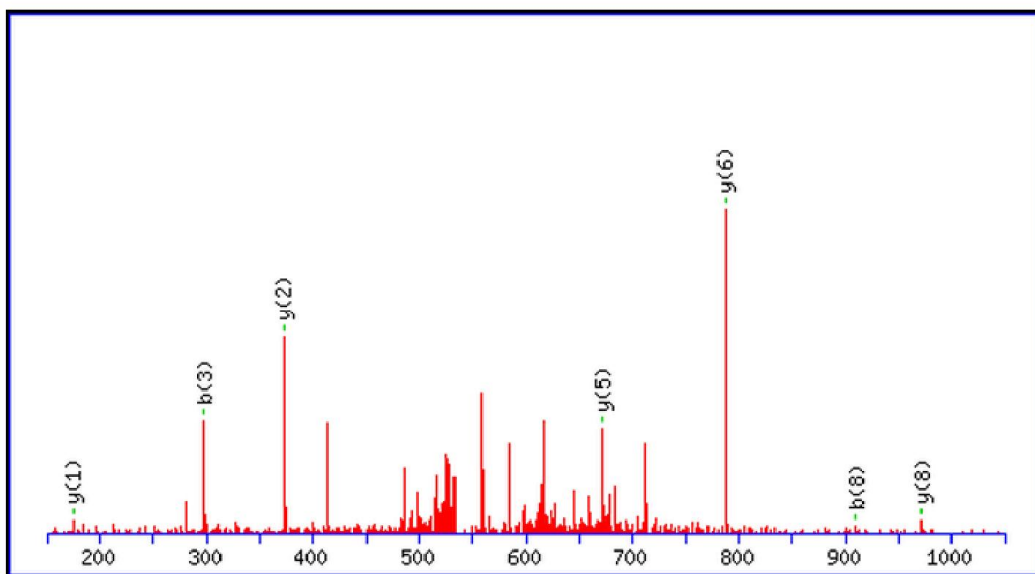

Monoisotopic mass of neutral peptide Mr(calc): 1083.6036

Fixed modifications: Carbamidomethyl (C)

Variable modifications:

K8 : Propionyl-Methylation (K)

Ions Score: 43 Expect: 0.017

Matches : 7/76 fragment ions using 9 mo:

| # | b               | b <sup>++</sup> | b*       | b <sup>*++</sup> | b <sup>0</sup> | b <sup>0++</sup> | Seq. | y               | y <sup>++</sup> | y*       | y <sup>*++</sup> | y <sup>0</sup> | y <sup>0++</sup> | # |
|---|-----------------|-----------------|----------|------------------|----------------|------------------|------|-----------------|-----------------|----------|------------------|----------------|------------------|---|
| 1 | 114.0913        | 57.5493         |          |                  |                |                  | L    |                 |                 |          |                  |                |                  | 9 |
| 2 | 201.1234        | 101.0653        |          |                  | 183.1128       | 92.0600          | S    | <b>971.5269</b> | 486.2671        | 954.5003 | 477.7538         | 953.5163       | 477.2618         | 8 |
| 3 | <b>298.1761</b> | 149.5917        |          |                  | 280.1656       | 140.5864         | P    | 884.4948        | 442.7511        | 867.4683 | 434.2378         | 866.4843       | 433.7458         | 7 |
| 4 | 413.2031        | 207.1052        |          |                  | 395.1925       | 198.0999         | D    | <b>787.4421</b> | 394.2247        | 770.4155 | 385.7114         | 769.4315       | 385.2194         | 6 |
| 5 | 527.2460        | 264.1266        | 510.2195 | 255.6134         | 509.2354       | 255.1214         | N    | <b>672.4151</b> | 336.7112        | 655.3886 | 328.1979         |                |                  | 5 |
| 6 | 584.2675        | 292.6374        | 567.2409 | 284.1241         | 566.2569       | 283.6321         | G    | 558.3722        | 279.6897        | 541.3457 | 271.1765         |                |                  | 4 |
| 7 | 712.3624        | 356.6849        | 695.3359 | 348.1716         | 694.3519       | 347.6796         | K    | 501.3507        | 251.1790        | 484.3242 | 242.6657         |                |                  | 3 |
| 8 | <b>910.4993</b> | 455.7533        | 893.4727 | 447.2400         | 892.4887       | 446.7480         | K    | <b>373.2558</b> | 187.1315        | 356.2292 | 178.6183         |                |                  | 2 |
| 9 |                 |                 |          |                  |                |                  | R    | <b>175.1190</b> | 88.0631         | 158.0924 | 79.5498          |                |                  | 1 |

Match to Query 2990: 1015.586708 from(508.800630,2+) intensity(289366.1875) rtinseconds(1549) scans(8352) index(7232)

Title: File1027 Spectrum7290 scans: 8352

Data file 2013-7-21-liver-Ca-Fr6-ZW.mgf

Click mouse within plot area to zoom in by factor of two about that point

Or, Plot from  to  Da Label all possible matches  Label matches used for scoring Show Y-axis 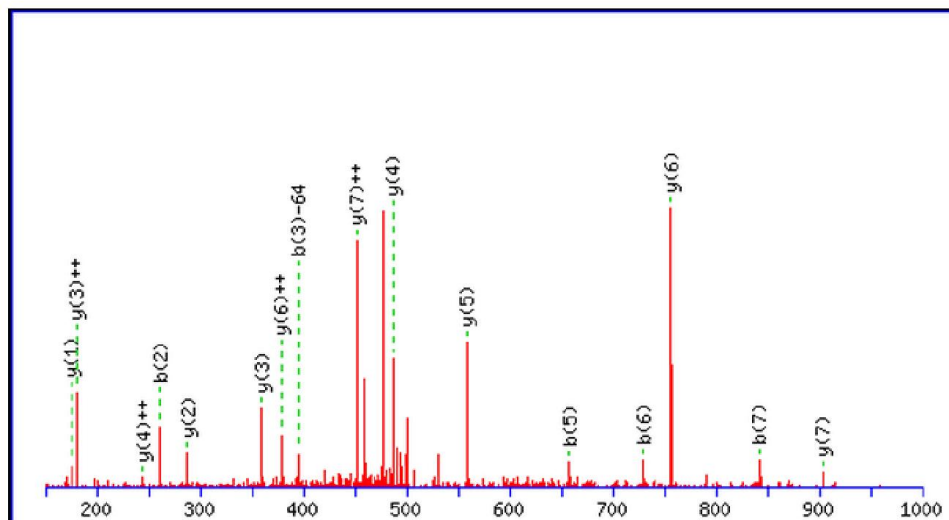Monoisotopic mass of neutral peptide  $M_r(\text{calc})$ : 1015.5848

Fixed modifications: Carbamidomethyl (C) (app)

Variable modifications:

M2 : Oxidation (M), with neutral losses 0

K3 : Propionyl-Methylation (K)

Ions Score: 55 Expect: 0.0025

Matches : 16/78 fragment ions using 25 most i

| # | b               | b <sup>++</sup> | b <sup>*</sup> | b <sup>*++</sup> | Seq. | y               | y <sup>++</sup> | y <sup>*</sup> | y <sup>*++</sup> | # |
|---|-----------------|-----------------|----------------|------------------|------|-----------------|-----------------|----------------|------------------|---|
| 1 | 114.0913        | 57.5493         |                |                  | I    |                 |                 |                |                  | 8 |
| 2 | <b>261.1267</b> | 131.0670        |                |                  | M    | <b>903.5081</b> | <b>452.2577</b> | 886.4815       | 443.7444         | 7 |
| 3 | 459.2636        | 230.1354        | 442.2370       | 221.6221         | K    | <b>756.4727</b> | <b>378.7400</b> | 739.4461       | 370.2267         | 6 |
| 4 | 530.3007        | 265.6540        | 513.2741       | 257.1407         | A    | <b>558.3358</b> | 279.6715        | 541.3093       | 271.1583         | 5 |
| 5 | <b>658.3593</b> | 329.6833        | 641.3327       | 321.1700         | Q    | <b>487.2987</b> | <b>244.1530</b> | 470.2722       | 235.6397         | 4 |
| 6 | <b>729.3964</b> | 365.2018        | 712.3698       | 356.6886         | A    | <b>359.2401</b> | <b>180.1237</b> | 342.2136       | 171.6104         | 3 |
| 7 | <b>842.4804</b> | 421.7439        | 825.4539       | 413.2306         | L    | <b>288.2030</b> | 144.6051        | 271.1765       | 136.0919         | 2 |
| 8 |                 |                 |                |                  | R    | <b>175.1190</b> | 88.0631         | 158.0924       | 79.5498          | 1 |

Match to Query 10700: 1470.804908 from(736.409730,2+) intensity(58645.5586) rtinseconds(1749) scans(10412) index(9337)

Title: File971 Spectrum9371 scans: 10412

Data file 2013-7-21-liver-Ca-Fr1,2-ZW.mgf

Click mouse within plot area to zoom in by factor of two about that point

Or, Plot from  to  Da Label all possible matches  Label matches used for scoring Show Y-axis 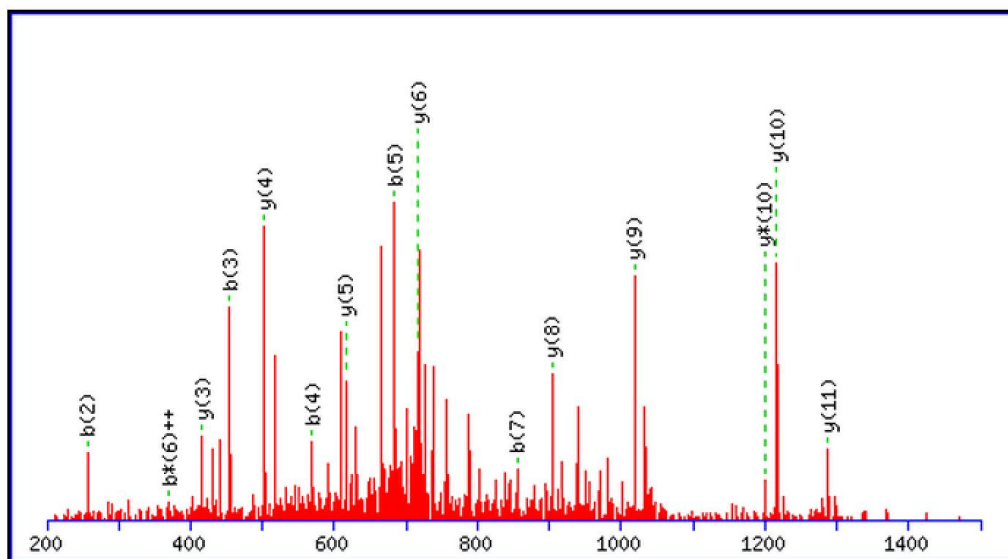

Monoisotopic mass of neutral peptide Mr(calc) = 1470.8049

Fixed modifications: Carbamidomethyl (C) (app

Variable modifications:

K1 : Propionyl (K)

K3 : Propionyl-Methylation (K)

K11 : Propionyl (K)

Ions Score: 35 Expect: 0.14

Matches : 15/120 fragment ions using 39 most

| #  | b               | b <sup>++</sup> | b*        | b <sup>+++</sup> | b <sup>0</sup> | b <sup>0++</sup> | Seq. | y                | y <sup>++</sup> | y*               | y <sup>+++</sup> | y <sup>0</sup> | y <sup>0++</sup> | #  |
|----|-----------------|-----------------|-----------|------------------|----------------|------------------|------|------------------|-----------------|------------------|------------------|----------------|------------------|----|
| 1  | 185.1285        | 93.0679         | 168.1019  | 84.5546          |                |                  | K    |                  |                 |                  |                  |                |                  | 12 |
| 2  | <b>256.1656</b> | 128.5864        | 239.1390  | 120.0731         |                |                  | A    | <b>1287.6903</b> | 644.3488        | 1270.6638        | 635.8355         | 1269.6797      | 635.3435         | 11 |
| 3  | <b>454.3024</b> | 227.6548        | 437.2758  | 219.1416         |                |                  | K    | <b>1216.6532</b> | 608.8302        | <b>1199.6266</b> | 600.3170         | 1198.6426      | 599.8250         | 10 |
| 4  | <b>569.3293</b> | 285.1683        | 552.3028  | 276.6550         | 551.3188       | 276.1630         | D    | <b>1018.5164</b> | 509.7618        | 1001.4898        | 501.2485         | 1000.5058      | 500.7565         | 9  |
| 5  | <b>684.3563</b> | 342.6818        | 667.3297  | 334.1685         | 666.3457       | 333.6765         | D    | <b>903.4894</b>  | 452.2483        | 886.4629         | 443.7351         | 885.4789       | 443.2431         | 8  |
| 6  | 755.3934        | 378.2003        | 738.3668  | <b>369.6871</b>  | 737.3828       | 369.1951         | A    | 788.4625         | 394.7349        | 771.4359         | 386.2216         | 770.4519       | 385.7296         | 7  |
| 7  | <b>856.4411</b> | 428.7242        | 839.4145  | 420.2109         | 838.4305       | 419.7189         | T    | <b>717.4254</b>  | 359.2163        | 700.3988         | 350.7030         | 699.4148       | 350.2110         | 6  |
| 8  | 969.5251        | 485.2662        | 952.4986  | 476.7529         | 951.5146       | 476.2609         | L    | <b>616.3777</b>  | 308.6925        | 599.3511         | 300.1792         | 598.3671       | 299.6872         | 5  |
| 9  | 1056.5572       | 528.7822        | 1039.5306 | 520.2689         | 1038.5466      | 519.7769         | S    | <b>503.2936</b>  | 252.1504        | 486.2671         | 243.6372         | 485.2831       | 243.1452         | 4  |
| 10 | 1113.5786       | 557.2930        | 1096.5521 | 548.7797         | 1095.5681      | 548.2877         | G    | <b>416.2616</b>  | 208.6344        | 399.2350         | 200.1212         |                |                  | 3  |
| 11 | 1297.6998       | 649.3535        | 1280.6733 | 640.8403         | 1279.6892      | 640.3483         | K    | 359.2401         | 180.1237        | 342.2136         | 171.6104         |                |                  | 2  |
| 12 |                 |                 |           |                  |                |                  | R    | 175.1190         | 88.0631         | 158.0924         | 79.5498          |                |                  | 1  |

Match to Query 2215: 933.539888 from(467.777220,2+) intensity(9739.5449) rtinseconds(905) scans(4506) index(3828)

Title: File971 Spectrum3837 scans: 4506

Data file 2013-7-21-liver-Ca-Fr1,2-ZW.mgf

Click mouse within plot area to zoom in by factor of two about that point

Or, Plot from  to  Da Label all possible matches  Label matches used for scoring Show Y-axis 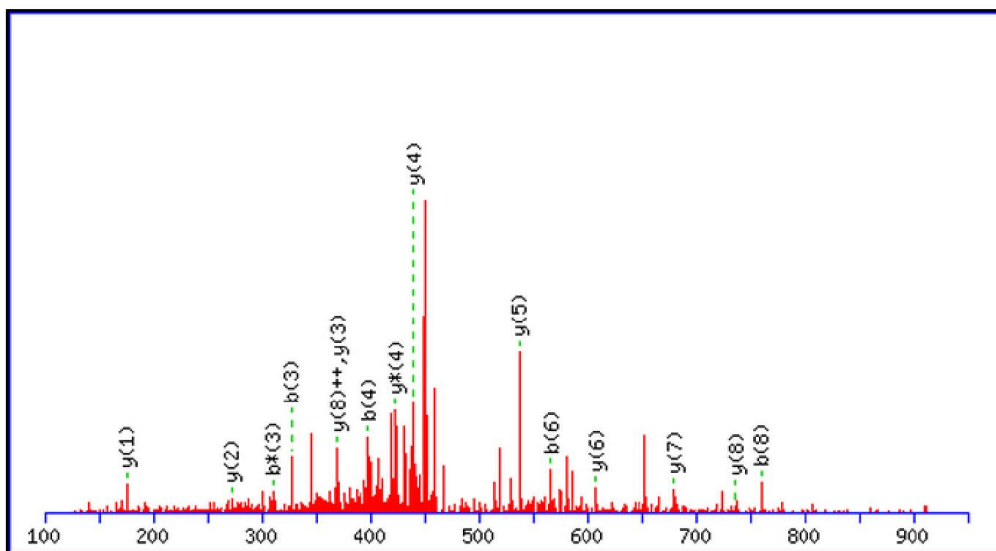

Monoisotopic mass of neutral peptide Mr(calc): 933.5396

Fixed modifications: Carbamidomethyl (C) (apply to speci

Variable modifications:

K1 : Propionyl-Methylation (K)

Ions Score: 35 Expect: 0.061

Matches : 15/64 fragment ions using 56 most intense peak

| # | b        | b <sup>++</sup> | b <sup>*</sup> | b <sup>*++</sup> | Seq. | y        | y <sup>++</sup> | y <sup>*</sup> | y <sup>*++</sup> | # |
|---|----------|-----------------|----------------|------------------|------|----------|-----------------|----------------|------------------|---|
| 1 | 199.1441 | 100.0757        | 182.1176       | 91.5624          | K    |          |                 |                |                  | 9 |
| 2 | 256.1656 | 128.5864        | 239.1390       | 120.0731         | G    | 736.4101 | 368.7087        | 719.3835       | 360.1954         | 8 |
| 3 | 327.2027 | 164.1050        | 310.1761       | 155.5917         | A    | 679.3886 | 340.1979        | 662.3620       | 331.6847         | 7 |
| 4 | 398.2398 | 199.6235        | 381.2132       | 191.1103         | A    | 608.3515 | 304.6794        | 591.3249       | 296.1661         | 6 |
| 5 | 495.2926 | 248.1499        | 478.2660       | 239.6366         | P    | 537.3144 | 269.1608        | 520.2878       | 260.6475         | 5 |
| 6 | 566.3297 | 283.6685        | 549.3031       | 275.1552         | A    | 440.2616 | 220.6344        | 423.2350       | 212.1212         | 4 |
| 7 | 663.3824 | 332.1949        | 646.3559       | 323.6816         | P    | 369.2245 | 185.1159        | 352.1979       | 176.6026         | 3 |
| 8 | 760.4352 | 380.7212        | 743.4087       | 372.2080         | P    | 272.1717 | 136.5895        | 255.1452       | 128.0762         | 2 |
| 9 |          |                 |                |                  | R    | 175.1190 | 88.0631         | 158.0924       | 79.5498          | 1 |



Match to Query 13350: 1552.856048 from(777.435300,2+) intensity(227217.9063) rtinseconds(1951) scans(10753) index(9516)

Title: File994 Spectrum9545 scans: 10753

Data file 2013-7-18-liver-Ca-Fr3,4-ZW.mgf

Click mouse within plot area to zoom in by factor of two about that point

Or,   to  Da Label all possible matches  Label matches used for scoring Show Y-axis 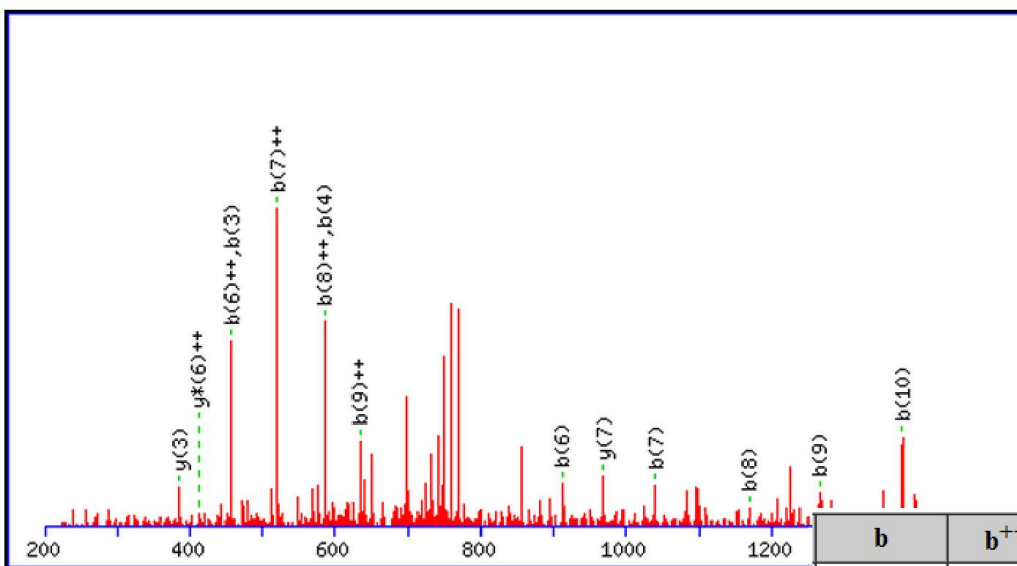

Monoisotopic mass of neutral peptide Mr(calc): 1552.846

Fixed modifications: Carbamidomethyl (C) (apply to spec)

Variable modifications:

K3 : Propionyl-Methylation (K)

K6 : Propionyl-Methylation (K)

Ions Score: 37 Expect: 0.073

Matches : 14/120 fragment ions using 25 most intense pe

| b                | b <sup>++</sup> | b <sup>*</sup> | b <sup>*++</sup> | Seq.     | y               | y <sup>++</sup> | y <sup>*</sup> | y <sup>*++</sup> | #         |
|------------------|-----------------|----------------|------------------|----------|-----------------|-----------------|----------------|------------------|-----------|
| 129.1022         | 65.0548         | 112.0757       | 56.5415          | <b>K</b> |                 |                 |                |                  | <b>11</b> |
| 258.1448         | 129.5761        | 241.1183       | 121.0628         | <b>E</b> | 1425.7584       | 713.3828        | 1408.7318      | 704.8696         | <b>10</b> |
| <b>456.2817</b>  | 228.6445        | 439.2551       | 220.1312         | <b>K</b> | 1296.7158       | 648.8615        | 1279.6892      | 640.3483         | <b>9</b>  |
| <b>585.3243</b>  | 293.1658        | 568.2977       | 284.6525         | <b>E</b> | 1098.5790       | 549.7931        | 1081.5524      | 541.2798         | <b>8</b>  |
| 713.3828         | 357.1951        | 696.3563       | 348.6818         | <b>Q</b> | <b>969.5364</b> | 485.2718        | 952.5098       | 476.7585         | <b>7</b>  |
| <b>911.5197</b>  | <b>456.2635</b> | 894.4931       | 447.7502         | <b>K</b> | 841.4778        | 421.2425        | 824.4512       | <b>412.7293</b>  | <b>6</b>  |
| <b>1040.5623</b> | <b>520.7848</b> | 1023.5357      | 512.2715         | <b>E</b> | 643.3410        | 322.1741        | 626.3144       | 313.6608         | <b>5</b>  |
| <b>1169.6048</b> | <b>585.3061</b> | 1152.5783      | 576.7928         | <b>E</b> | 514.2984        | 257.6528        | 497.2718       | 249.1395         | <b>4</b>  |
| <b>1266.6576</b> | <b>633.8324</b> | 1249.6311      | 625.3192         | <b>P</b> | <b>385.2558</b> | 193.1315        | 368.2292       | 184.6183         | <b>3</b>  |
| <b>1379.7417</b> | 690.3745        | 1362.7151      | 681.8612         | <b>L</b> | 288.2030        | 144.6051        | 271.1765       | 136.0919         | <b>2</b>  |
|                  |                 |                |                  | <b>R</b> | 175.1190        | 88.0631         | 158.0924       | 79.5498          | <b>1</b>  |

Match to Query 9695: 1545.856668 from(773.935610,2+) intensity(142534.7344) rtinseconds(2385) scans(13179) index(11610)

Title: File1038 Spectrum11670 scans: 13179

Data file 2013-7-19-Liver Ca-Fr13,14-ZW.mgf

Click mouse within plot area to zoom in by factor of two about that point

Or,  200 to  Da Label all possible matches  Label matches used for scoring Show Y-axis 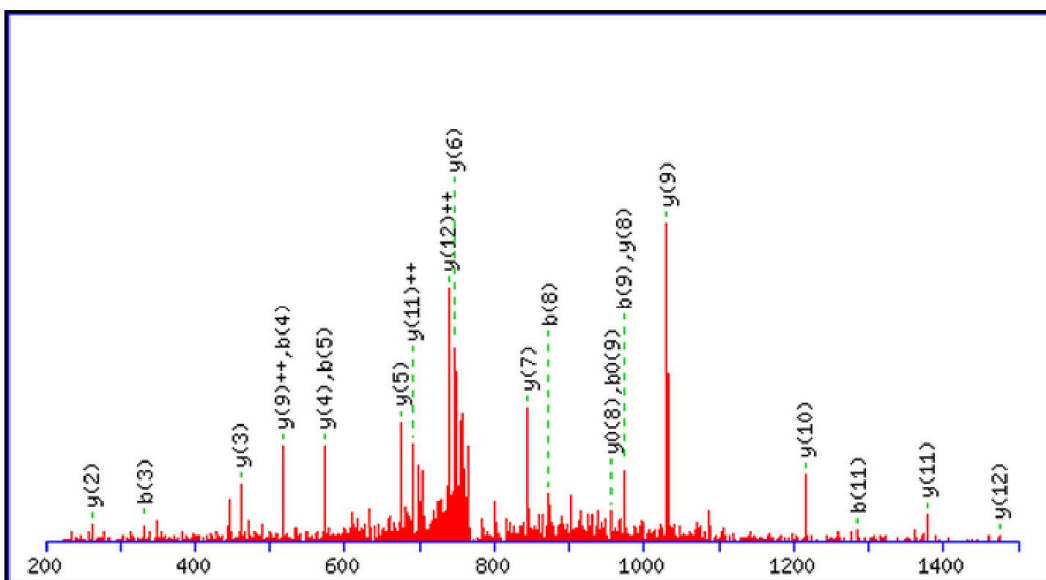

Monoisotopic mass of neutral peptide Mr(calc): 1545.856668

Fixed modifications: Carbamidomethyl (C) (apply to all)

Variable modifications:

K4 : Propionyl (K)

K11 : Propionyl-Methylation (K)

Ions Score: 93 Expect: 2e-007

Matches : 22/126 fragment ions using 26 most interesting

| #  | b         | b <sup>++</sup> | b <sup>*</sup> | b <sup>***</sup> | b <sup>0</sup> | b <sup>0++</sup> | Seq. | y         | y <sup>++</sup> | y <sup>*</sup> | y <sup>***</sup> | y <sup>0</sup> | y <sup>0++</sup> | #  |
|----|-----------|-----------------|----------------|------------------|----------------|------------------|------|-----------|-----------------|----------------|------------------|----------------|------------------|----|
| 1  | 72.0444   | 36.5258         |                |                  |                |                  | A    |           |                 |                |                  |                |                  | 13 |
| 2  | 169.0972  | 85.0522         |                |                  |                |                  | P    | 1474.8264 | 737.9168        | 1457.7999      | 729.4036         | 1456.8158      | 728.9116         | 12 |
| 3  | 332.1605  | 166.5839        |                |                  |                |                  | Y    | 1377.7736 | 689.3905        | 1360.7471      | 680.8772         | 1359.7631      | 680.3852         | 11 |
| 4  | 516.2817  | 258.6445        | 499.2551       | 250.1312         |                |                  | K    | 1214.7103 | 607.8588        | 1197.6838      | 599.3455         | 1196.6997      | 598.8535         | 10 |
| 5  | 573.3031  | 287.1552        | 556.2766       | 278.6419         |                |                  | G    | 1030.5891 | 515.7982        | 1013.5626      | 507.2849         | 1012.5786      | 506.7929         | 9  |
| 6  | 702.3457  | 351.6765        | 685.3192       | 343.1632         | 684.3352       | 342.6712         | E    | 973.5677  | 487.2875        | 956.5411       | 478.7742         | 955.5571       | 478.2822         | 8  |
| 7  | 801.4141  | 401.2107        | 784.3876       | 392.6974         | 783.4036       | 392.2054         | V    | 844.5251  | 422.7662        | 827.4985       | 414.2529         | 826.5145       | 413.7609         | 7  |
| 8  | 872.4512  | 436.7293        | 855.4247       | 428.2160         | 854.4407       | 427.7240         | A    | 745.4567  | 373.2320        | 728.4301       | 364.7187         | 727.4461       | 364.2267         | 6  |
| 9  | 973.4989  | 487.2531        | 956.4724       | 478.7398         | 955.4884       | 478.2478         | T    | 674.4196  | 337.7134        | 657.3930       | 329.2001         | 656.4090       | 328.7081         | 5  |
| 10 | 1086.5830 | 543.7951        | 1069.5564      | 535.2819         | 1068.5724      | 534.7899         | L    | 573.3719  | 287.1896        | 556.3453       | 278.6763         | 555.3613       | 278.1843         | 4  |
| 11 | 1284.7198 | 642.8635        | 1267.6933      | 634.3503         | 1266.7093      | 633.8583         | K    | 460.2878  | 230.6475        | 443.2613       | 222.1343         | 442.2772       | 221.6423         | 3  |
| 12 | 1371.7518 | 686.3796        | 1354.7253      | 677.8663         | 1353.7413      | 677.3743         | S    | 262.1510  | 131.5791        | 245.1244       | 123.0659         | 244.1404       | 122.5738         | 2  |
| 13 |           |                 |                |                  |                |                  | R    | 175.1190  | 88.0631         | 158.0924       | 79.5498          |                |                  | 1  |

Found in **Q5VTE0**, Putative elongation factor 1-alpha-like 3 OS=Homo sapiens GN=EEF1A1P5 PE=5 SV=1

Match to Query 15877: 3782.031882 from(1261.684570,3+) intensity(129542.4141)

Title: File1271 Spectrum13903 scans: 16460

Data file I:\2013-9-5-Hela-Prometh-Fr20-ZW.mgf

Click mouse within plot area to zoom in by factor of two about that point

Or,   to  Da Label all possible matches  Label matches used for scoring 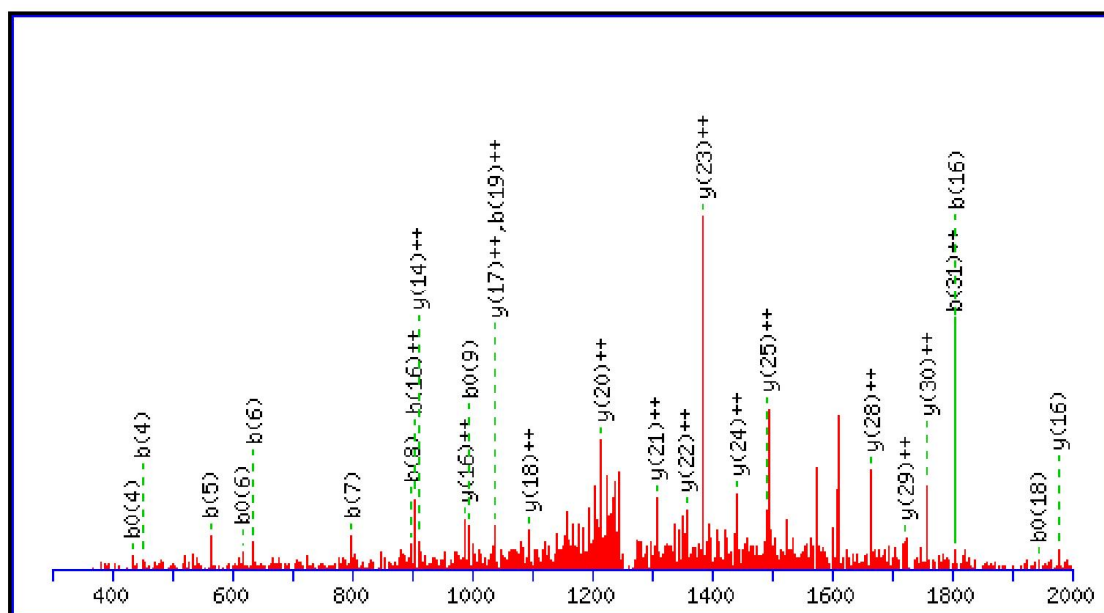

Monoisotopic mass of neutral peptide Mr(calc): 3781.0124

Fixed modifications: Carbamidomethyl (C) (apply to specified residues or termini only)

Variable modifications:

K12 : Propionyl (K)

K20 : Propionyl-Methylation (K)

K31 : Propionyl-Methylation (K)

Ions Score: 55 Expect: 0.0034

Matches : 27/344 fragment ions using 51 most intense peaks ([help](#))

Match to Query 14176: 2057.146152 from(686.722660,3+) intensity(30272.7520)

Title: File1264 Spectrum11284 scans: 13069

Data file I:\2013-9-5-Hela-Prometh-Fr13-ZW.mgf

Click mouse within plot area to zoom in by factor of two about that point

Or,  100 to  Da Label all possible matches  Label matches used for scoring 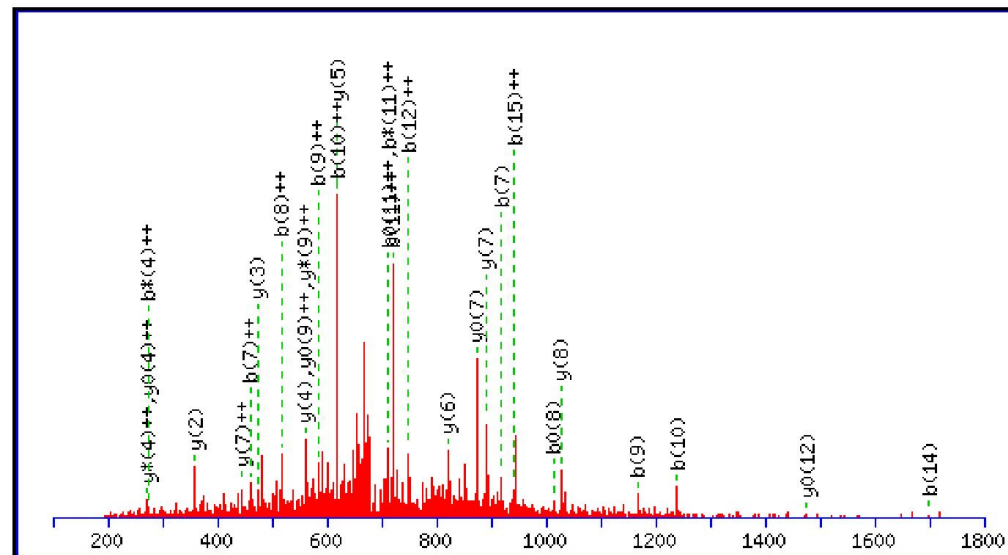

Monoisotopic mass of neutral peptide Mr(calc): 2057.1484

Fixed modifications: Carbamidomethyl (C) (apply to specified residue)

Variable modifications:

K4 : Propionyl (K)

M9 : Label:13C(1)2H(3) (M)

K11 : Propionyl-(13CD3)Methyl (K)

K15 : Propionyl (K)

Ions Score: 23 Expect: 4.6

Matches : 29/170 fragment ions using 61 most intense peaks [\(help\)](#)

| #  | b         | b <sup>++</sup> | b <sup>+</sup> | b <sup>+++</sup> | b <sup>0</sup> | b <sup>0++</sup> | Seq. | y         | y <sup>++</sup> | y <sup>+</sup> | y <sup>+++</sup> | y <sup>0</sup> | y <sup>0++</sup> | #  |
|----|-----------|-----------------|----------------|------------------|----------------|------------------|------|-----------|-----------------|----------------|------------------|----------------|------------------|----|
| 1  | 130.0499  | 65.5286         |                |                  | 112.0393       | 56.5233          | E    |           |                 |                |                  |                |                  | 16 |
| 2  | 267.1088  | 134.0580        |                |                  | 249.0982       | 125.0527         | H    | 1929.1131 | 965.0602        | 1912.0866      | 956.5469         | 1911.1026      | 956.0549         | 15 |
| 3  | 380.1928  | 190.6001        |                |                  | 362.1823       | 181.5948         | I    | 1792.0542 | 896.5308        | 1775.0277      | 888.0175         | 1774.0437      | 887.5255         | 14 |
| 4  | 564.3140  | 282.6606        | 547.2875       | 274.1474         | 546.3035       | 273.6554         | K    | 1678.9702 | 839.9887        | 1661.9436      | 831.4755         | 1660.9596      | 830.9834         | 13 |
| 5  | 663.3824  | 332.1949        | 646.3559       | 323.6816         | 645.3719       | 323.1896         | V    | 1494.8490 | 747.9281        | 1477.8224      | 739.4149         | 1476.8384      | 738.9229         | 12 |
| 6  | 791.4410  | 396.2241        | 774.4145       | 387.7109         | 773.4304       | 387.2189         | Q    | 1395.7806 | 698.3939        | 1378.7540      | 689.8807         | 1377.7700      | 689.3886         | 11 |
| 7  | 919.4996  | 460.2534        | 902.4730       | 451.7402         | 901.4890       | 451.2482         | Q    | 1267.7220 | 634.3646        | 1250.6955      | 625.8514         | 1249.7114      | 625.3594         | 10 |
| 8  | 1032.5837 | 516.7955        | 1015.5571      | 508.2822         | 1014.5731      | 507.7902         | L    | 1139.6634 | 570.3354        | 1122.6369      | 561.8221         | 1121.6529      | 561.3301         | 9  |
| 9  | 1167.6463 | 584.3268        | 1150.6198      | 575.8135         | 1149.6358      | 575.3215         | M    | 1026.5794 | 513.7933        | 1009.5528      | 505.2800         | 1008.5688      | 504.7880         | 8  |
| 10 | 1238.6834 | 619.8454        | 1221.6569      | 611.3321         | 1220.6729      | 610.8401         | A    | 891.5167  | 446.2620        | 874.4901       | 437.7487         | 873.5061       | 437.2567         | 7  |
| 11 | 1440.8425 | 720.9249        | 1423.8159      | 712.4116         | 1422.8319      | 711.9196         | K    | 820.4796  | 410.7434        | 803.4530       | 402.2302         | 802.4690       | 401.7381         | 6  |
| 12 | 1497.8639 | 749.4356        | 1480.8374      | 740.9223         | 1479.8534      | 740.4303         | G    | 618.3206  | 309.6639        | 601.2940       | 301.1506         | 600.3100       | 300.6586         | 5  |
| 13 | 1584.8959 | 792.9516        | 1567.8694      | 784.4383         | 1566.8854      | 783.9463         | S    | 561.2991  | 281.1532        | 544.2726       | 272.6399         | 543.2885       | 272.1479         | 4  |
| 14 | 1699.9229 | 850.4651        | 1682.8963      | 841.9518         | 1681.9123      | 841.4598         | D    | 474.2671  | 237.6372        | 457.2405       | 229.1239         | 456.2565       | 228.6319         | 3  |
| 15 | 1884.0441 | 942.5257        | 1867.0175      | 934.0124         | 1866.0335      | 933.5204         | K    | 359.2401  | 180.1237        | 342.2136       | 171.6104         |                |                  | 2  |
| 16 |           |                 |                |                  |                |                  | R    | 175.1190  | 88.0631         | 158.0924       | 79.5498          |                |                  | 1  |

Match to Query 4633: 1374.713848 from(688.364200,2+) intensity(349942.2500)

Title: File1332 Spectrum10994 scans: 12239

Data file I:\2013-9-14-Hela-Prometh-Fr10-ZW.mgf

Click mouse within plot area to zoom in by factor of two about that point

Or,   to  Da Label all possible matches  Label matches used for scoring 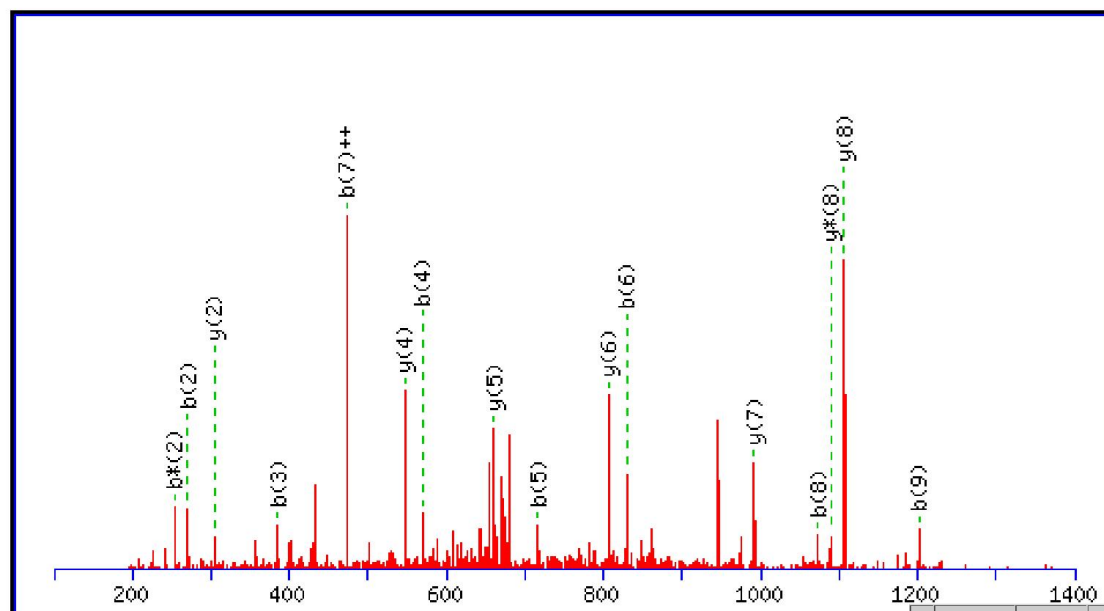

Monoisotopic mass of neutral peptide Mr(calc) : 1374.7143

Fixed modifications: Carbamidomethyl (C) (apply to speci

Variable modifications:

K2 : Propionyl-Methylation (K)

K4 : Propionyl (K)

Ions Score: 47 Expect: 0.012

Matches : 16/100 fragment ions using 24 most intense pea

| #  | b         | b <sup>++</sup> | b <sup>+</sup> | b <sup>+++</sup> | b <sup>0</sup> | b <sup>0++</sup> | Seq. | y         | y <sup>++</sup> | y <sup>+</sup> | y <sup>+++</sup> | y <sup>0</sup> | y <sup>0++</sup> | #  |
|----|-----------|-----------------|----------------|------------------|----------------|------------------|------|-----------|-----------------|----------------|------------------|----------------|------------------|----|
| 1  | 720.144   | 36.5258         |                |                  |                |                  | A    |           |                 |                |                  |                |                  | 10 |
| 2  | 270.1812  | 135.5942        | 253.1547       | 127.0810         |                |                  | K    | 1304.6845 | 652.8459        | 1287.6579      | 644.3326         | 1286.6739      | 643.8406         | 9  |
| 3  | 385.2082  | 193.1077        | 368.1816       | 184.5944         | 367.1976       | 184.1024         | D    | 1106.5477 | 553.7775        | 1089.5211      | 545.2642         | 1088.5371      | 544.7722         | 8  |
| 4  | 569.3293  | 285.1683        | 552.3028       | 276.6550         | 551.3188       | 276.1630         | K    | 991.5207  | 496.2640        | 974.4942       | 487.7507         | 973.5102       | 487.2587         | 7  |
| 5  | 716.3978  | 358.7025        | 699.3712       | 350.1892         | 698.3872       | 349.6972         | F    | 807.3995  | 404.2034        | 790.3730       | 395.6901         | 789.3890       | 395.1981         | 6  |
| 6  | 829.4818  | 415.2445        | 812.4553       | 406.7313         | 811.4713       | 406.2393         | L    | 660.3311  | 330.6692        | 643.3046       | 322.1559         | 642.3206       | 321.6639         | 5  |
| 7  | 944.5088  | 472.7580        | 927.4822       | 464.2447         | 926.4982       | 463.7527         | D    | 547.2471  | 274.1272        | 530.2205       | 265.6139         | 529.2365       | 265.1219         | 4  |
| 8  | 1072.5673 | 536.7873        | 1055.5408      | 528.2740         | 1054.5568      | 527.7820         | Q    | 432.2201  | 216.6137        | 415.1936       | 208.1004         | 414.2096       | 207.6084         | 3  |
| 9  | 1201.6099 | 601.3086        | 1184.5834      | 592.7953         | 1183.5994      | 592.3033         | E    | 304.1615  | 152.5844        | 287.1350       | 144.0711         | 286.1510       | 143.5791         | 2  |
| 10 |           |                 |                |                  |                |                  | R    | 175.1190  | 88.0631         | 158.0924       | 79.5498          |                |                  | 1  |

Found in **A6PW79**, Cyclic GMP-AMP synthase OS=Homo sapiens GN=MB21D1 PE=2 SV=1

Match to Query 1841: 923.556128 from(462.785340,2+) intensity(1239225.8750)

Title: File1335 Spectrum3633 scans: 4254

Data file I:\2013-9-14-Hela-Prometh-Fr8-ZW.mgf

Click mouse within plot area to zoom in by factor of two about that point

Or, Plot from  to  Da Label all possible matches  Label matches used for scoring 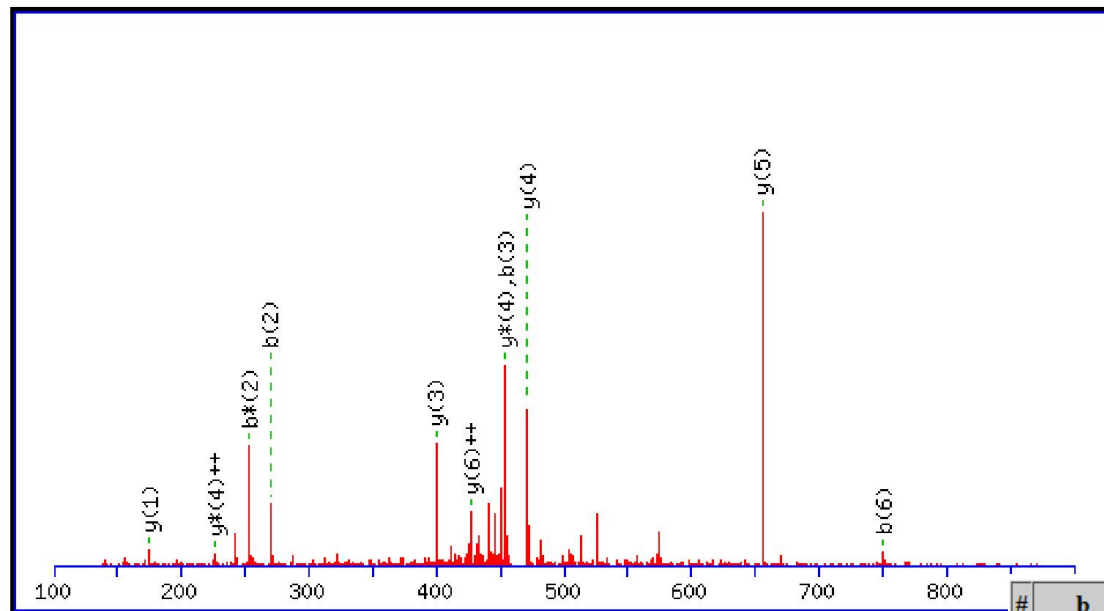

Monoisotopic mass of neutral peptide Mr(calc): 923.5552

Fixed modifications: Carbamidomethyl (C) (apply to specified residues)

Variable modifications:

K2 : Propionyl-Methylation (K)

K3 : Propionyl (K)

Ions Score: 23 Expect: 1.4

Matches : 11/46 fragment ions using 16 most intense peaks (highlighted in table)

| # | b               | b <sup>++</sup> | b <sup>*</sup>  | b <sup>+++</sup> | Seq. | y               | y <sup>++</sup> | y <sup>*</sup>  | y <sup>+++</sup> | # |
|---|-----------------|-----------------|-----------------|------------------|------|-----------------|-----------------|-----------------|------------------|---|
| 1 | 72.0444         | 36.5258         |                 |                  | A    |                 |                 |                 |                  | 7 |
| 2 | <b>70.1812</b>  | 135.5942        | <b>253.1547</b> | 127.0810         | K    | 853.5254        | <b>427.2663</b> | 836.4989        | 418.7531         | 6 |
| 3 | <b>454.3024</b> | 227.6548        | 437.2758        | 219.1416         | K    | <b>655.3886</b> | 328.1979        | 638.3620        | 319.6847         | 5 |
| 4 | 525.3395        | 263.1734        | 508.3130        | 254.6601         | A    | <b>471.2674</b> | 236.1373        | <b>454.2409</b> | <b>227.6241</b>  | 4 |
| 5 | 622.3923        | 311.6998        | 605.3657        | 303.1865         | P    | <b>400.2303</b> | 200.6188        | 383.2037        | 192.1055         | 3 |
| 6 | <b>750.4509</b> | 375.7291        | 733.4243        | 367.2158         | Q    | 303.1775        | 152.0924        | 286.1510        | 143.5791         | 2 |
| 7 |                 |                 |                 |                  | R    | <b>175.1190</b> | 88.0631         | 158.0924        | 79.5498          | 1 |

Found in **HOYG16**, Kinesin light chain 1 (Fragment) OS=Homo sapiens GN=KLC1 PE=4 SV=1

Match to Query 8214: 1405.740568 from(703.877560, 2+) intensity(40945.4180)

Title: File2136 Spectrum6068 scans: 7077

Data file I:\2013-12-03-SIMM7721-PR1-10-ZW.mgf

Click mouse within plot area to zoom in by factor of two about that point

Or,   to  Da

Label all possible matches  Label matches used for scoring

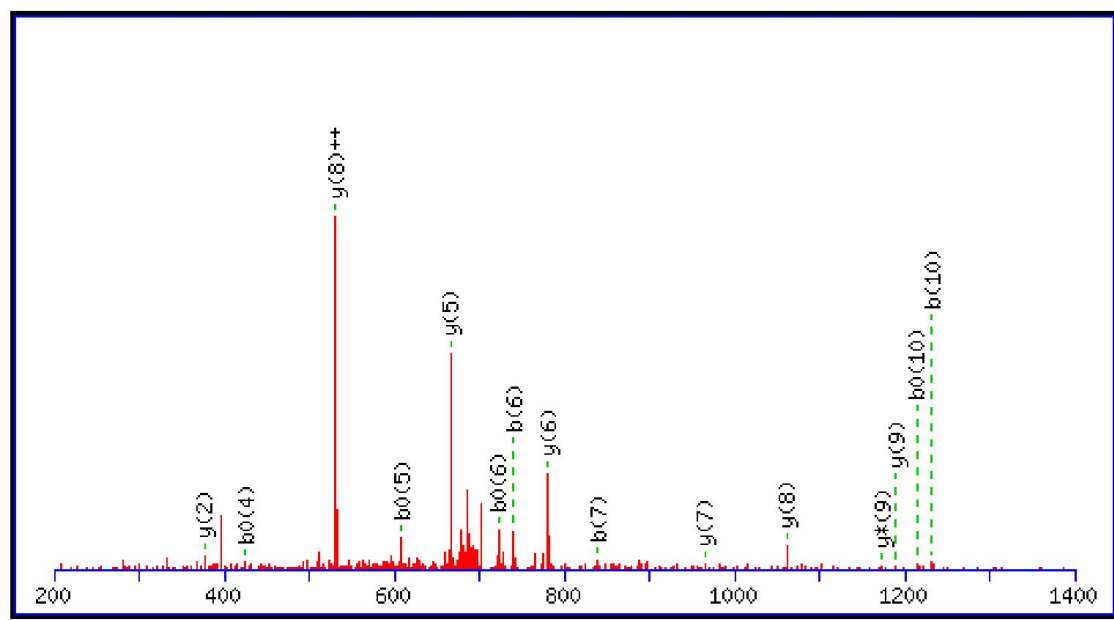

**Monoisotopic mass of neutral peptide Mr(calc): 1405.7416**

**Fixed modifications:** Carbamidomethyl (C) (apply to specific...)

**Variable modifications:**

- K5** : Propionyl (K)
- M9** : Label:13C(1)2H(3) (M)
- K10** : Propionyl-(13CD3)Methyl (K)

**Ions Score: 26 Expect: 1.1**

**Matches : 15/96 fragment ions using 36 most intense peaks**

| #  | b                | b <sup>++</sup> | b*        | b* <sup>++</sup> | b <sup>0</sup>   | b <sup>0++</sup> | Seq. | y                | y <sup>++</sup> | y*               | y* <sup>++</sup> | y <sup>0</sup> | y <sup>0++</sup> | #  |
|----|------------------|-----------------|-----------|------------------|------------------|------------------|------|------------------|-----------------|------------------|------------------|----------------|------------------|----|
| 1  | 130.0499         | 65.5286         |           |                  | 112.0393         | 56.5233          | E    |                  |                 |                  |                  |                |                  | 11 |
| 2  | 217.0819         | 109.0446        |           |                  | 199.0713         | 100.0393         | S    | 1277.7064        | 639.3568        | 1260.6798        | 630.3435         | 1259.6958      | 630.3515         | 10 |
| 3  | 346.1245         | 173.5659        |           |                  | 328.1139         | 164.5606         | E    | <b>1190.6743</b> | 595.8408        | <b>1173.6478</b> | 587.3275         | 1172.6638      | 586.8355         | 9  |
| 4  | 443.1773         | 222.0923        |           |                  | <b>425.1667</b>  | 213.0870         | P    | <b>1061.6317</b> | <b>531.3195</b> | 1044.6052        | 522.8062         |                |                  | 8  |
| 5  | 627.2984         | 314.1529        | 610.2719  | 305.6396         | <b>609.2879</b>  | 305.1476         | K    | <b>964.5790</b>  | 482.7931        | 947.5524         | 474.2798         |                |                  | 7  |
| 6  | <b>741.3414</b>  | 371.1743        | 724.3148  | 362.6610         | <b>723.3308</b>  | 362.1690         | N    | <b>780.4578</b>  | 390.7325        | 763.4312         | 382.2193         |                |                  | 6  |
| 7  | <b>838.3941</b>  | 419.7007        | 821.3676  | 411.1874         | 820.3836         | 410.6954         | P    | <b>666.4149</b>  | 333.7111        | 649.3883         | 325.1978         |                |                  | 5  |
| 8  | 895.4156         | 448.2114        | 878.3890  | 439.6982         | 877.4050         | 439.2061         | G    | 569.3621         | 285.1847        | 552.3356         | 276.6714         |                |                  | 4  |
| 9  | 1030.4783        | 515.7428        | 1013.4517 | 507.2295         | 1012.4677        | 506.7375         | N    | 512.3406         | 256.6740        | 495.3141         | 248.1607         |                |                  | 3  |
| 10 | <b>1232.6373</b> | 616.8223        | 1215.6107 | 608.3090         | <b>1214.6267</b> | 607.8170         | K    | <b>377.2780</b>  | 189.1426        | 360.2514         | 180.6293         |                |                  | 2  |
| 11 |                  |                 |           |                  |                  |                  | R    | 175.1190         | 88.0631         | 158.0924         | 79.5498          |                |                  | 1  |

Match to Query 2116: 958.607888 from(480.311220,2+) intensity(122317.9688)

Title: File2044 Spectrum8587 scans: 9583

Data file I:\2013-12-03-SIMM7721-FR8-ZW.mgf

Click mouse within plot area to zoom in by factor of two about that point

Or,   to  Da Label all possible matches  Label matches used for scoring 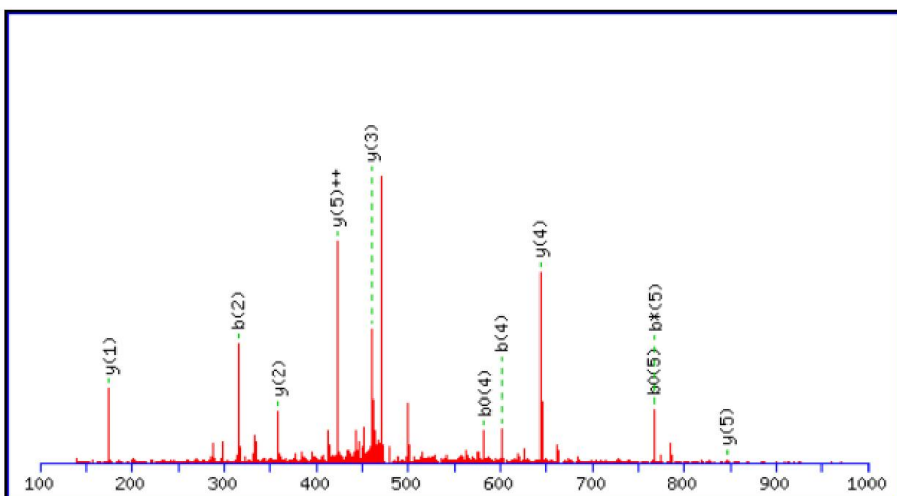Monoisotopic mass of neutral peptide  $M_r(\text{calc})$ : 958.6084

Fixed modifications: Carbamidomethyl (C) (apply to specified residues or termini only)

Variable modifications:

N-term : Propionyl (protein N-term) (Protein N-term)

K2 : Propionyl-(13CD3)Methyl (K)

K3 : Propionyl (K)

K5 : Propionyl (K)

Ions Score: 37 Expect: 0.033

Matches : 11/48 fragment ions using 16 most intense peaks ([help](#))

| # | b               | b <sup>++</sup> | b*              | b <sup>+++</sup> | b <sup>0</sup>  | b <sup>0++</sup> | Seq. | y               | y <sup>++</sup> | y*       | y <sup>+++</sup> | y <sup>0</sup> | y <sup>0++</sup> | # |
|---|-----------------|-----------------|-----------------|------------------|-----------------|------------------|------|-----------------|-----------------|----------|------------------|----------------|------------------|---|
| 1 | 114.0550        | 57.5311         |                 |                  |                 |                  | G    |                 |                 |          |                  |                |                  | 6 |
| 2 | <b>316.2140</b> | 158.6106        | 299.1874        | 150.0973         |                 |                  | K    | <b>846.5680</b> | <b>423.7876</b> | 829.5415 | 415.2744         | 828.5574       | 414.7824         | 5 |
| 3 | 500.3351        | 250.6712        | 483.3086        | 242.1579         |                 |                  | K    | <b>644.4090</b> | 322.7081        | 627.3824 | 314.1949         | 626.3984       | 313.7028         | 4 |
| 4 | <b>601.3828</b> | 301.1951        | 584.3563        | 292.6818         | <b>583.3723</b> | 292.1898         | T    | <b>460.2878</b> | 230.6475        | 443.2613 | 222.1343         | 442.2772       | 221.6423         | 3 |
| 5 | 785.5040        | 393.2556        | <b>768.4775</b> | 384.7424         | <b>767.4934</b> | 384.2504         | K    | <b>359.2407</b> | 180.1237        | 342.2136 | 171.6104         |                |                  | 2 |
| 6 |                 |                 |                 |                  |                 |                  | R    | <b>175.1190</b> | 88.0631         | 158.0924 | 79.5498          |                |                  | 1 |



Match to Query 4149: 1185.678568 from(593.846560,2+) intensity(237169.2656)

Title: File1319 Spectrum12309 scans: 13093

Data file I:\2013-9-13-Hela-Prometh-Fr2-ZW.mgf

Click mouse within plot area to zoom in by factor of two about that point

Or,   to  Da Label all possible matches  Label matches used for scoring 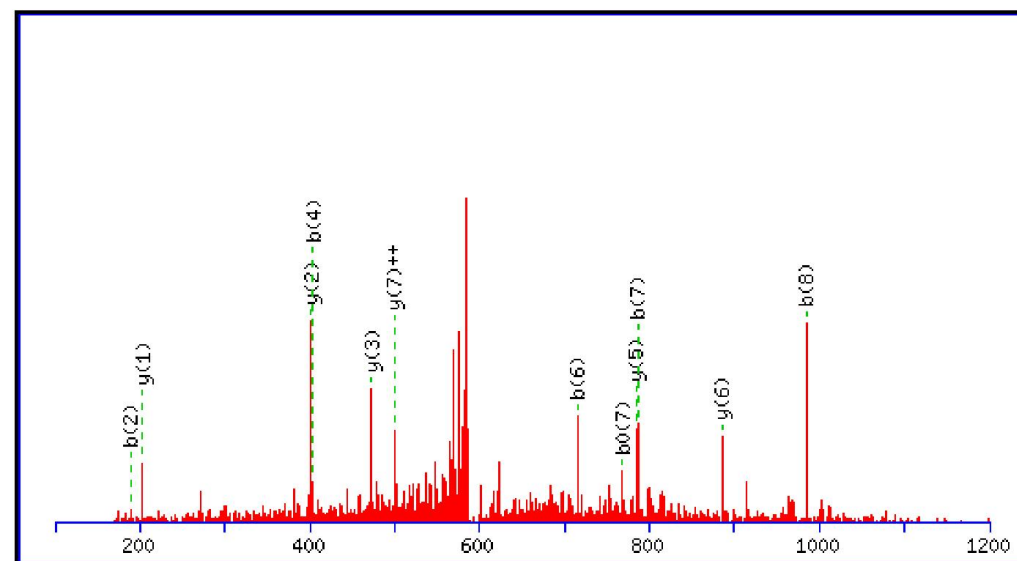

Monoisotopic mass of neutral peptide Mr(calc): 1185.6791

Fixed modifications: Carbamidomethyl (C) (apply to specified residues)

Variable modifications:

K5 : Propionyl (K)

K8 : Propionyl-Methylation (K)

K9 : Propionyl (K)

Ions Score: 35 Expect: 0.23

Matches : 12/72 fragment ions using 20 most intense peaks [\(help\)](#)

| # | b               | b <sup>++</sup> | b <sup>+</sup> | b <sup>+++</sup> | b <sup>0</sup>  | b <sup>0++</sup> | Seq. | y               | y <sup>++</sup> | y <sup>+</sup> | y <sup>+++</sup> | y <sup>0</sup> | y <sup>0++</sup> | # |
|---|-----------------|-----------------|----------------|------------------|-----------------|------------------|------|-----------------|-----------------|----------------|------------------|----------------|------------------|---|
| 1 | 58.0287         | 29.5180         |                |                  |                 |                  | G    |                 |                 |                |                  |                |                  | 9 |
| 2 | <b>189.0692</b> | 95.0383         |                |                  |                 |                  | M    | 1129.6649       | 565.3361        | 1112.6384      | 556.8228         | 1111.6544      | 556.3308         | 8 |
| 3 | 302.1533        | 151.5803        |                |                  |                 |                  | I    | 998.6245        | <b>499.8159</b> | 981.5979       | 491.3026         | 980.6139       | 490.8106         | 7 |
| 4 | <b>403.2010</b> | 202.1041        |                |                  | 385.1904        | 193.0988         | T    | <b>885.5404</b> | 443.2738        | 868.5138       | 434.7606         | 867.5298       | 434.2686         | 6 |
| 5 | 587.3221        | 294.1647        | 570.2956       | 285.6514         | 569.3116        | 285.1594         | K    | <b>784.4927</b> | 392.7500        | 767.4662       | 384.2367         |                |                  | 5 |
| 6 | <b>715.3807</b> | 358.1940        | 698.3542       | 349.6807         | 697.3702        | 349.1887         | Q    | 600.3715        | 300.6894        | 583.3450       | 292.1761         |                |                  | 4 |
| 7 | <b>786.4178</b> | 393.7126        | 769.3913       | 385.1993         | <b>768.4073</b> | 384.7073         | A    | <b>472.3130</b> | 236.6601        | 455.2864       | 228.1468         |                |                  | 3 |
| 8 | <b>984.5547</b> | 492.7810        | 967.5281       | 484.2677         | 966.5441        | 483.7757         | K    | <b>401.2758</b> | 201.1416        | 384.2493       | 192.6283         |                |                  | 2 |
| 9 |                 |                 |                |                  |                 |                  | K    | <b>203.1390</b> | 102.0731        | 186.1125       | 93.5599          |                |                  | 1 |

Found in **H0YIQ2**, YLP motif-containing protein 1 (Fragment) OS=Homo sapiens GN=YLPM1 PE=2 SV=1

Match to Query 4068: 1314.692968 from(658.353760,2+) intensity(82092.8750)

Title: File1332 Spectrum10706 scans: 11939

Data file I:\2013-9-14-Hela-Prometh-Fr10-ZW.mgf

Click mouse within plot area to zoom in by factor of two about that point

Or,   to  Da Label all possible matches  Label matches used for scoring 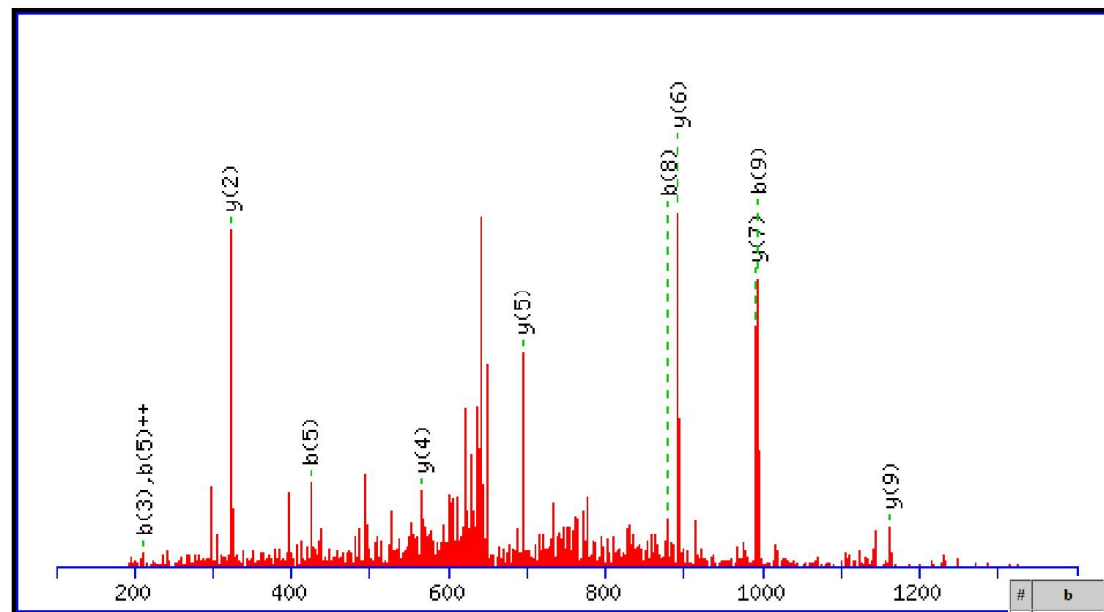Monoisotopic mass of neutral peptide  $M_r(\text{calc})$ : 1314.6932

Fixed modifications: Carbamidomethyl (C) (apply to specified r

Variable modifications:

K6 : Propionyl-Methylation (K)

Ions Score: 36 Expect: 0.15

Matches : 11/92 fragment ions using 22 most intense peaks

| #  | b               | b <sup>++</sup> | b <sup>+</sup> | b <sup>+++</sup> | b <sup>0</sup> | b <sup>0++</sup> | Seq. | y                | y <sup>++</sup> | y <sup>+</sup> | y <sup>+++</sup> | y <sup>0</sup> | y <sup>0++</sup> | #  |
|----|-----------------|-----------------|----------------|------------------|----------------|------------------|------|------------------|-----------------|----------------|------------------|----------------|------------------|----|
| 1  | 58.0287         | 29.5180         |                |                  |                |                  | G    |                  |                 |                |                  |                |                  | 11 |
| 2  | 155.0815        | 78.0444         |                |                  |                |                  | P    | 1258.6790        | 629.8431        | 1241.6525      | 621.3299         | 1240.6684      | 620.8379         | 10 |
| 3  | <b>212.1030</b> | 106.5551        |                |                  |                |                  | G    | <b>1161.6263</b> | 581.3168        | 1144.5997      | 572.8035         | 1143.6157      | 572.3115         | 9  |
| 4  | 325.1870        | 163.0972        |                |                  |                |                  | L    | 1104.6048        | 552.8060        | 1087.5782      | 544.2928         | 1086.5942      | 543.8007         | 8  |
| 5  | <b>424.2554</b> | <b>212.6314</b> |                |                  |                |                  | V    | <b>991.5207</b>  | 496.2640        | 974.4942       | 487.7507         | 973.5102       | 487.2587         | 7  |
| 6  | 622.3923        | 311.6998        | 605.3657       | 303.1865         |                |                  | K    | <b>892.4523</b>  | 446.7298        | 875.4258       | 438.2165         | 874.4417       | 437.7245         | 6  |
| 7  | 750.4509        | 375.7291        | 733.4243       | 367.2158         |                |                  | Q    | <b>694.3155</b>  | 347.6614        | 677.2889       | 339.1481         | 676.3049       | 338.6561         | 5  |
| 8  | <b>879.4934</b> | 440.2504        | 862.4669       | 431.7371         | 861.4829       | 431.2451         | E    | <b>566.2569</b>  | 283.6321        | 549.2304       | 275.1188         | 548.2463       | 274.6268         | 4  |
| 9  | <b>994.5204</b> | 497.7638        | 977.4938       | 489.2506         | 976.5098       | 488.7585         | D    | 437.2143         | 219.1108        | 420.1878       | 210.5975         | 419.2037       | 210.1055         | 3  |
| 10 | 1141.5888       | 571.2980        | 1124.5623      | 562.7848         | 1123.5782      | 562.2928         | F    | <b>322.1874</b>  | 161.5973        | 305.1608       | 153.0840         |                |                  | 2  |
| 11 |                 |                 |                |                  |                |                  | R    | 175.1190         | 88.0631         | 158.0924       | 79.5498          |                |                  | 1  |

Found in **BLAKZ3**, Astrocytic phosphoprotein PEA-15 OS=Homo sapiens GN=PEA15 PE=2 SV=1

Match to Query 6766: 1616.978728 from(809.496640,2+) intensity(103500.7734)

Title: File1296 Spectrum11928 scans: 13586

Data file I:\2013-9-12-Hela-Prometh-Fr14-ZW.mgf

Click mouse within plot area to zoom in by factor of two about that point

Or,  200  1700  Label all possible matches  Label matches used for scoring 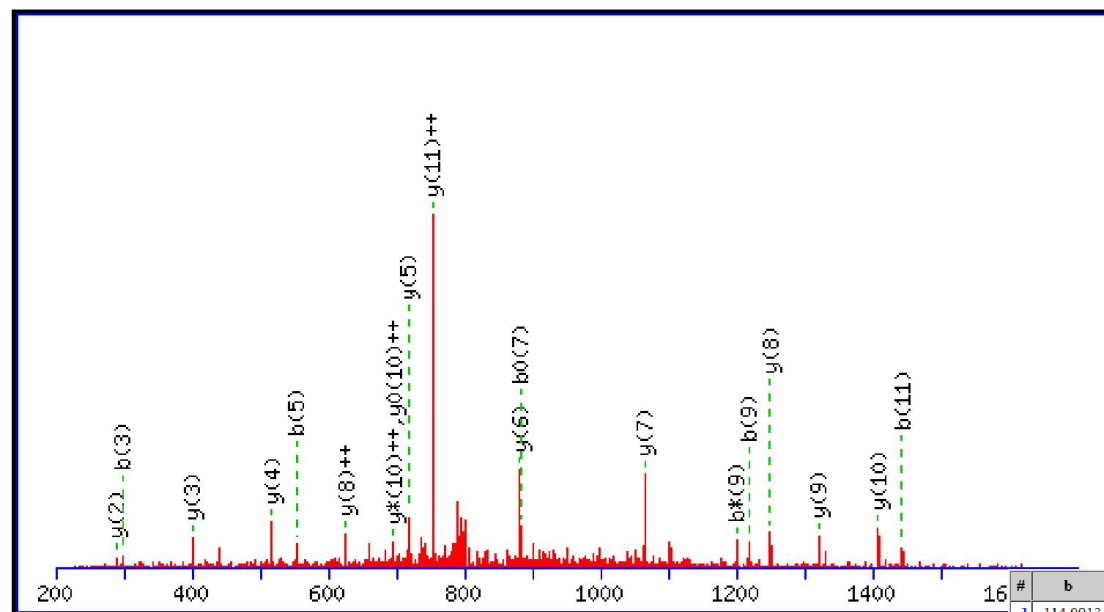

Monoisotopic mass of neutral peptide Mr(calc): 1616.9774

Fixed modifications: Carbamidomethyl (C) (apply to specified r

Variable modifications:

K5 : Propionyl (K)

K6 : Propionyl (K)

K8 : Propionyl-(13CD3)Methyl (K)

Ions Score: 65 Expect: 9.8e-005

Matches : 19/114 fragment ions using 28 most intense peaks

| #  | b                | b <sup>++</sup> | b <sup>+</sup>   | b <sup>+++</sup> | b <sup>0</sup>  | b <sup>0++</sup> | Seq. | y                | y <sup>++</sup> | y <sup>+</sup> | y <sup>+++</sup> | y <sup>0</sup> | y <sup>0++</sup> | #  |
|----|------------------|-----------------|------------------|------------------|-----------------|------------------|------|------------------|-----------------|----------------|------------------|----------------|------------------|----|
| 1  | 114.0913         | 57.5493         |                  |                  |                 |                  | I    |                  |                 |                |                  |                |                  | 12 |
| 2  | 211.1441         | 106.0757        |                  |                  |                 |                  | P    | 1504.9006        | 752.9540        | 1487.8741      | 744.4407         | 1486.8901      | 743.9487         | 11 |
| 3  | <b>298.1761</b>  | 149.5917        |                  |                  | 280.1656        | 140.5864         | S    | <b>1407.8479</b> | 704.4276        | 1390.8213      | <b>695.9143</b>  | 1389.8373      | <b>695.4223</b>  | 10 |
| 4  | 369.2132         | 185.1103        |                  |                  | 351.2027        | 176.1050         | A    | <b>1320.8158</b> | 660.9116        | 1303.7893      | 652.3983         | 1302.8053      | 651.9063         | 9  |
| 5  | <b>553.3344</b>  | 277.1709        | 536.3079         | 268.6576         | 535.3239        | 268.1656         | K    | <b>1249.7787</b> | <b>625.3930</b> | 1232.7522      | 616.8797         | 1231.7682      | 616.3877         | 8  |
| 6  | 737.4556         | 369.2314        | 720.4291         | 360.7182         | 719.4450        | 360.2262         | K    | <b>1065.6575</b> | 533.3324        | 1048.6310      | 524.8191         | 1047.6470      | 524.3271         | 7  |
| 7  | 900.5189         | 450.7631        | 883.4924         | 442.2498         | <b>882.5084</b> | 441.7578         | Y    | <b>881.5364</b>  | 441.2718        | 864.5098       | 432.7585         | 863.5258       | 432.2665         | 6  |
| 8  | 1102.6779        | 551.8426        | 1085.6514        | 543.3293         | 1084.6674       | 542.8373         | K    | <b>718.4730</b>  | 359.7402        | 701.4465       | 351.2269         | 700.4625       | 350.7349         | 5  |
| 9  | <b>1217.7049</b> | 609.3561        | <b>1200.6783</b> | 600.8428         | 1199.6943       | 600.3508         | D    | <b>516.3140</b>  | 258.6606        | 499.2875       | 250.1474         | 498.3035       | 249.6554         | 4  |
| 10 | 1330.7890        | 665.8981        | 1313.7624        | 657.3848         | 1312.7784       | 656.8928         | I    | <b>401.2871</b>  | 201.1472        | 384.2605       | 192.6339         |                |                  | 3  |
| 11 | <b>1443.8730</b> | 722.4401        | 1426.8465        | 713.9269         | 1425.8624       | 713.4349         | I    | <b>288.2030</b>  | 144.6051        | 271.1765       | 136.0919         |                |                  | 2  |
| 12 |                  |                 |                  |                  |                 |                  | R    | 175.1190         | 88.0631         | 158.0924       | 79.5498          |                |                  | 1  |

Match to Query Y1097: 1564.830428 from(783.422490,2+) intensity(154179.9531)

Title: File2112 Spectrum11368 scans: 12633

Data file I:\2013-12-03-SIMM7721-FR1-2-ZW.mgf

Click mouse within plot area to zoom in by factor of two about that point

Or,  200  1600  Label all possible matches  Label matches used for scoring 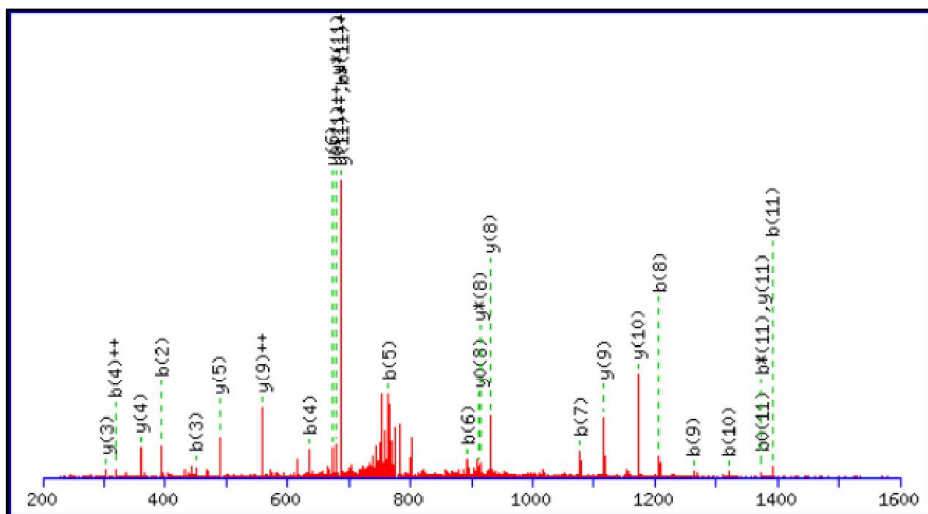Monoisotopic mass of neutral peptide  $M_r(\text{calc})$ : 1564.8312

Fixed modifications: Carbamidomethyl (C) (apply to specified residues or termini only)

Variable modifications:

N-term : Propionyl (protein N-term) (Protein N-term)

M1 : Label:13C(1)2H(3) (M)

K2 : Propionyl-(13CD3)Methyl (K)

K4 : Propionyl (K)

K7 : Propionyl (K)

Ions Score: 52 Expect: 0.0032

Matches : 28/114 fragment ions using 53 most intense peaks [\(help\)](#)

| #  | b                | b <sup>++</sup> | b <sup>*</sup>   | b <sup>+++</sup> | b <sup>0</sup>   | b <sup>0++</sup> | Seq. | y                | y <sup>++</sup> | y <sup>*</sup>  | y <sup>+++</sup> | y <sup>0</sup>  | y <sup>0++</sup> | #  |
|----|------------------|-----------------|------------------|------------------|------------------|------------------|------|------------------|-----------------|-----------------|------------------|-----------------|------------------|----|
| 1  | 192.0962         | 96.5517         |                  |                  |                  |                  | M    |                  |                 |                 |                  |                 |                  | 12 |
| 2  | <b>394.2552</b>  | 197.6312        | 377.2286         | 189.1180         |                  |                  | K    | <b>1374.7496</b> | <b>687.8784</b> | 1357.7231       | <b>679.3652</b>  | 1356.7390       | <b>678.8732</b>  | 11 |
| 3  | <b>451.2766</b>  | 226.1420        | 434.2501         | 217.6287         |                  |                  | G    | <b>1172.5906</b> | 586.7989        | 1155.5640       | 578.2857         | 1154.5800       | 577.7937         | 10 |
| 4  | <b>635.3978</b>  | <b>318.2025</b> | 618.3713         | 309.6893         |                  |                  | K    | <b>1115.5691</b> | <b>558.2882</b> | 1098.5426       | 549.7749         | 1097.5586       | 549.2829         | 9  |
| 5  | <b>764.4404</b>  | 382.7238        | 747.4139         | 374.2106         | 746.4298         | 373.7186         | E    | <b>931.4480</b>  | 466.2276        | <b>914.4214</b> | 457.7143         | <b>913.4374</b> | 457.2223         | 8  |
| 6  | <b>893.4830</b>  | 447.2451        | 876.4565         | 438.7319         | 875.4724         | 438.2399         | E    | 802.4054         | 401.7063        | 785.3788        | 393.1930         | 784.3948        | 392.7010         | 7  |
| 7  | <b>1077.6042</b> | 539.3057        | 1060.5776        | 530.7925         | 1059.5936        | 530.3004         | K    | <b>673.3628</b>  | 337.1850        | 656.3362        | 328.6717         | 655.3522        | 328.1797         | 6  |
| 8  | <b>1206.6468</b> | 603.8270        | 1189.6202        | 595.3138         | 1188.6362        | 594.8217         | E    | <b>489.2416</b>  | 245.1244        | 472.2150        | 236.6112         | 471.2310        | 236.1191         | 5  |
| 9  | <b>1263.6682</b> | 632.3378        | 1246.6417        | 623.8245         | 1245.6577        | 623.3325         | G    | <b>360.1990</b>  | 180.6031        | 343.1724        | 172.0899         |                 |                  | 4  |
| 10 | <b>1320.6897</b> | 660.8485        | 1303.6632        | 652.3352         | 1302.6791        | 651.8432         | G    | <b>303.1775</b>  | 152.0924        | 286.1510        | 143.5791         |                 |                  | 3  |
| 11 | <b>1391.7268</b> | 696.3670        | <b>1374.7003</b> | <b>687.8538</b>  | <b>1373.7162</b> | 687.3618         | A    | 246.1561         | 123.5817        | 229.1295        | 115.0684         |                 |                  | 2  |
| 12 |                  |                 |                  |                  |                  |                  | R    | 175.1190         | 88.0631         | 158.0924        | 79.5498          |                 |                  | 1  |

Match to Query 7434: 1558.883768 from(780.449160,2+) intensity(436528.8125)

Title: File1484 Spectrum14847 scans: 16385

Data file I:\2013-9-12-Hela-Prometh-Fr18-ZW.mgf

Click mouse within plot area to zoom in by factor of two about that point

Or,  200  1600  Label all possible matches  Label matches used for scoring 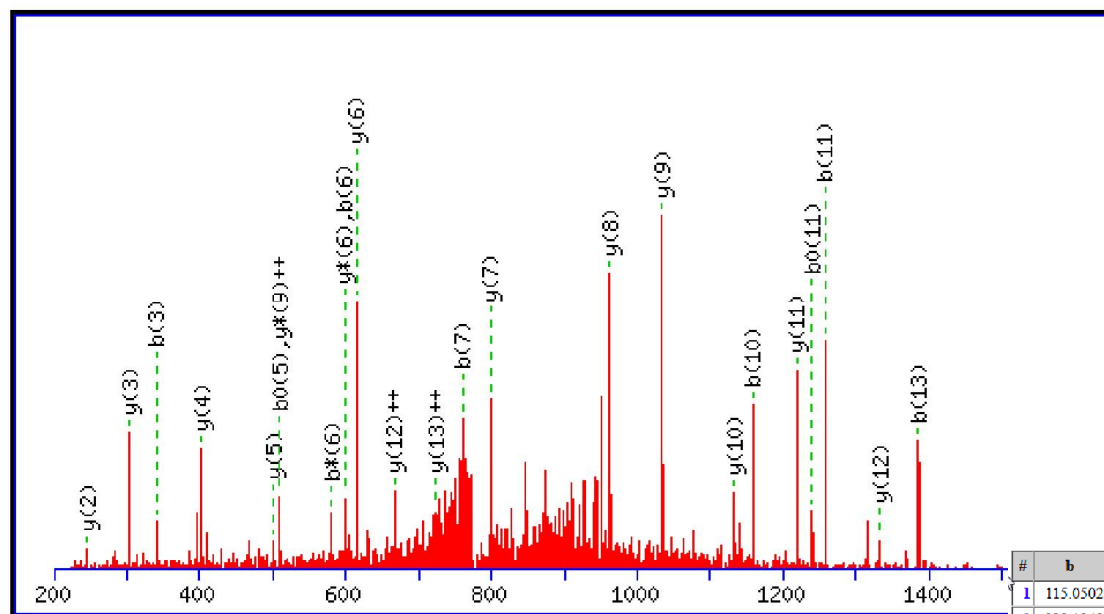

Monoisotopic mass of neutral peptide Mr(calc): 1558.8831

Fixed modifications: Carbamidomethyl (C) (apply to specified re

Variable modifications:

K8 : Propionyl (K)

Ions Score: 70 Expect: 7.6e-005

Matches : 24/130 fragment ions using 41 most intense peaks

| #  | b                | b <sup>++</sup> | b <sup>+</sup>  | b <sup>+++</sup> | b <sup>0</sup>   | b <sup>0++</sup> | Seq. | y                | y <sup>++</sup> | y <sup>+</sup>  | y <sup>+++</sup> | y <sup>0</sup> | y <sup>0++</sup> | #  |
|----|------------------|-----------------|-----------------|------------------|------------------|------------------|------|------------------|-----------------|-----------------|------------------|----------------|------------------|----|
| 1  | 115.0502         | 58.0287         | 98.0237         | 49.5155          |                  |                  | N    |                  |                 |                 |                  |                |                  | 14 |
| 2  | 228.1343         | 114.5708        | 211.1077        | 106.0575         |                  |                  | L    | 1445.8475        | 723.4274        | 1428.8209       | 714.9141         | 1427.8369      | 714.4221         | 13 |
| 3  | <b>341.2183</b>  | 171.1128        | 324.1918        | 162.5995         |                  |                  | L    | <b>1332.7634</b> | <b>666.8853</b> | 1315.7369       | 658.3721         | 1314.7528      | 657.8801         | 12 |
| 4  | 428.2504         | 214.6288        | 411.2238        | 206.1155         | 410.2398         | 205.6235         | S    | <b>1219.6793</b> | 610.3433        | 1202.6528       | 601.8300         | 1201.6688      | 601.3380         | 11 |
| 5  | 527.3188         | 264.1630        | 510.2922        | 255.6497         | <b>509.3082</b>  | 255.1577         | V    | <b>1132.6473</b> | 566.8273        | 1115.6208       | 558.3140         |                |                  | 10 |
| 6  | <b>598.3559</b>  | 299.6816        | <b>581.3293</b> | 291.1683         | 580.3453         | 290.6763         | A    | <b>1033.5789</b> | 517.2931        | 1016.5524       | <b>508.7798</b>  |                |                  | 9  |
| 7  | <b>761.4192</b>  | 381.2132        | 744.3927        | 372.7000         | 743.4087         | 372.2080         | Y    | <b>962.5418</b>  | 481.7745        | 945.5152        | 473.2613         |                |                  | 8  |
| 8  | 945.5404         | 473.2738        | 928.5138        | 464.7606         | 927.5298         | 464.2686         | K    | <b>799.4785</b>  | 400.2429        | 782.4519        | 391.7296         |                |                  | 7  |
| 9  | 1059.5833        | 530.2953        | 1042.5568       | 521.7820         | 1041.5728        | 521.2900         | N    | <b>615.3573</b>  | 308.1823        | <b>598.3307</b> | 299.6690         |                |                  | 6  |
| 10 | <b>1158.6517</b> | 579.8295        | 1141.6252       | 571.3162         | 1140.6412        | 570.8242         | V    | <b>501.3144</b>  | 251.1608        | 484.2878        | 242.6475         |                |                  | 5  |
| 11 | <b>1257.7201</b> | 629.3637        | 1240.6936       | 620.8504         | <b>1239.7096</b> | 620.3584         | V    | <b>402.2459</b>  | 201.6266        | 385.2194        | 193.1133         |                |                  | 4  |
| 12 | 1314.7416        | 657.8744        | 1297.7151       | 649.3612         | 1296.7310        | 648.8692         | G    | <b>303.1775</b>  | 152.0924        | 286.1510        | 143.5791         |                |                  | 3  |
| 13 | <b>1385.7787</b> | 693.3930        | 1368.7522       | 684.8797         | 1367.7682        | 684.3877         | A    | <b>246.1561</b>  | 123.5817        | 229.1295        | 115.0684         |                |                  | 2  |
| 14 |                  |                 |                 |                  |                  |                  | R    | 175.1190         | 88.0631         | 158.0924        | 79.5498          |                |                  | 1  |

Match to Query 7071: 1254.719448 from(628.367000,2+) intensity(35620.6836)

Title: File320 Spectrum6206 scans: 7243

Data file \\192.168.1.104\public\raw data\Elite\_01\methylation\_ZW\k562\2013-5-23-562-Kpropio-methyl-IP-Fr5-ZW.mgf

Click mouse within plot area to zoom in by factor of two about that point

Or,   to  Da Label all possible matches  Label matches used for scoring 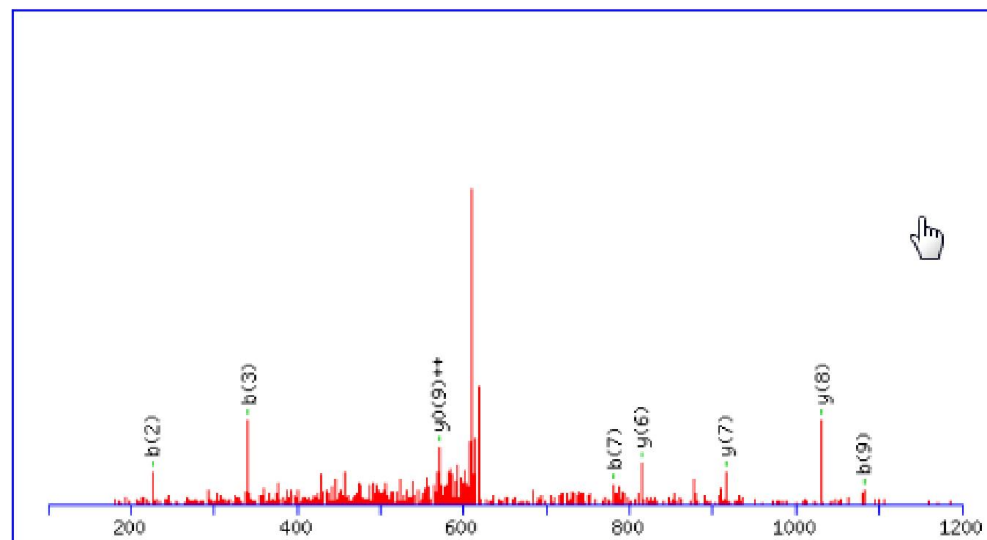

Monoisotopic mass of neutral peptide Mr(calc): 1254.7205

Fixed modifications: Carbamidomethyl (C) (apply to specified residues or termini only)

Variable modifications:

K5 : Propionyl (K)

K9 : Propionyl-(13CD3)Methyl (K)

Ions Score: 29 Expect: 0.47

Matches : 8/90 fragment ions using 11 most intense peaks ([help](#))

| #  | b                | b <sup>++</sup> | b <sup>+</sup> | b <sup>+++</sup> | b <sup>0</sup> | b <sup>0++</sup> | Seq. | y                | y <sup>++</sup> | y <sup>+</sup> | y <sup>+++</sup> | y <sup>0</sup> | y <sup>0++</sup> | #  |
|----|------------------|-----------------|----------------|------------------|----------------|------------------|------|------------------|-----------------|----------------|------------------|----------------|------------------|----|
| 1  | 98.0600          | 49.5337         |                |                  |                |                  | P    |                  |                 |                |                  |                |                  | 10 |
| 2  | <b>226.1186</b>  | 113.5629        | 209.0921       | 105.0497         |                |                  | Q    | 1158.6750        | 579.8411        | 1141.6484      | 571.3279         | 1140.6644      | <b>570.8358</b>  | 9  |
| 3  | <b>341.1456</b>  | 171.0764        | 324.1190       | 162.5631         | 323.1350       | 162.0711         | D    | <b>1030.6164</b> | 515.8118        | 1013.5899      | 507.2986         | 1012.0058      | 506.8066         | 8  |
| 4  | 442.1932         | 221.6003        | 425.1667       | 213.0870         | 424.1827       | 212.5950         | T    | <b>915.5895</b>  | 458.2984        | 898.5629       | 449.7851         | 897.5789       | 449.2931         | 7  |
| 5  | 626.3144         | 313.6608        | 609.2879       | 305.1476         | 608.3039       | 304.6556         | K    | <b>814.5418</b>  | 407.7745        | 797.5152       | 399.2613         |                |                  | 6  |
| 6  | 723.3672         | 362.1872        | 706.3406       | 353.6740         | 705.3566       | 353.1819         | P    | 630.4206         | 315.7139        | 613.3941       | 307.2007         |                |                  | 5  |
| 7  | <b>780.3886</b>  | 390.6980        | 763.3621       | 382.1847         | 762.3781       | 381.6927         | G    | 533.3678         | 267.1876        | 516.3413       | 258.6743         |                |                  | 4  |
| 8  | 879.4571         | 440.2322        | 862.4305       | 431.7189         | 861.4465       | 431.2269         | V    | 476.3464         | 238.6768        | 459.3198       | 230.1636         |                |                  | 3  |
| 9  | <b>1081.6161</b> | 541.3117        | 1064.5895      | 532.7984         | 1063.6055      | 532.3064         | K    | 377.2780         | 189.1426        | 360.2514       | 180.6293         |                |                  | 2  |
| 10 |                  |                 |                |                  |                |                  | R    | 175.1190         | 88.0631         | 158.0924       | 79.5498          |                |                  | 1  |

MS/MS Fragmentation of **SSALIKHKR**Found in **Q5TEG9**, Zinc finger protein 436 OS=Homo sapiens GN=ZNF436 PE=2 SV=1

Match to Query 2760: 1164.686628 from(583.350590, 2+) intensity(358703.2813)

Title: File1332 Spectrum11041 scans: 12288

Data file I:\2013-9-14-Hela-Prometh-Fr10-ZW.mgf

Click mouse within plot area to zoom in by factor of two about that point

Or,   to  Da Label all possible matches  Label matches used for scoring 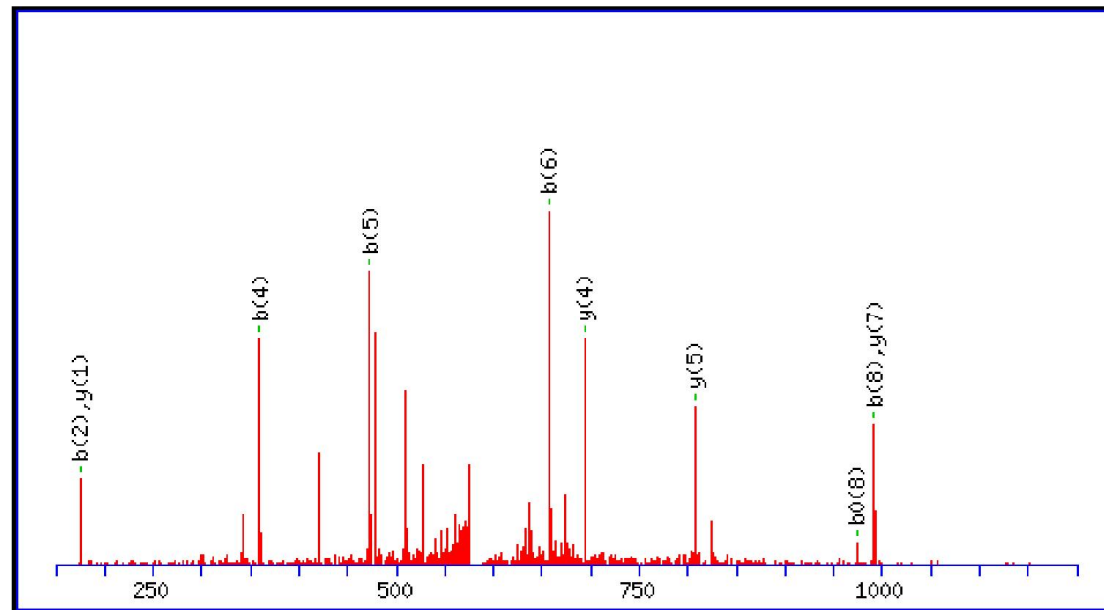**Monoisotopic mass of neutral peptide Mr(calc):** 1164.6979**Fixed modifications:** Carbamidomethyl (C) (apply to specified residues or termini only)**Variable modifications:****K6** : Propionyl (K)**K8** : Propionyl-Methylation (K)**Ions Score:** 39 **Expect:** 0.056**Matches** : 10/72 fragment ions using 10 most intense peaks ([help](#))

| # | b               | b <sup>++</sup> | b*       | b <sup>+++</sup> | b <sup>0</sup>  | b <sup>0++</sup> | Seq. | y               | y <sup>++</sup> | y*        | y <sup>+++</sup> | y <sup>0</sup> | y <sup>0++</sup> | # |
|---|-----------------|-----------------|----------|------------------|-----------------|------------------|------|-----------------|-----------------|-----------|------------------|----------------|------------------|---|
| 1 | 88.0393         | 44.5233         |          |                  | 70.0287         | 35.5180          | S    |                 |                 |           |                  |                |                  | 9 |
| 2 | <b>175.0713</b> | 88.0393         |          |                  | 157.0608        | 79.0340          | S    | 1078.6731       | 539.8402        | 1061.6466 | 531.3269         | 1060.6626      | 530.8349         | 8 |
| 3 | 246.1084        | 123.5579        |          |                  | 228.0979        | 114.5526         | A    | <b>991.6411</b> | 496.3242        | 974.6146  | 487.8109         |                |                  | 7 |
| 4 | <b>359.1925</b> | 180.0999        |          |                  | 341.1819        | 171.0946         | L    | 920.6040        | 460.8056        | 903.5774  | 452.2924         |                |                  | 6 |
| 5 | <b>472.2766</b> | 236.6419        |          |                  | 454.2660        | 227.6366         | I    | <b>807.5199</b> | 404.2636        | 790.4934  | 395.7503         |                |                  | 5 |
| 6 | <b>656.3978</b> | 328.7025        | 639.3712 | 320.1892         | 638.3872        | 319.6972         | K    | <b>694.4359</b> | 347.7216        | 677.4093  | 339.2083         |                |                  | 4 |
| 7 | 793.4567        | 397.2320        | 776.4301 | 388.7187         | 775.4461        | 388.2267         | H    | 510.3147        | 255.6610        | 493.2881  | 247.1477         |                |                  | 3 |
| 8 | <b>991.5935</b> | 496.3004        | 974.5669 | 487.7871         | <b>973.5829</b> | 487.2951         | K    | 373.2558        | 187.1315        | 356.2292  | 178.6183         |                |                  | 2 |
| 9 |                 |                 |          |                  |                 |                  | R    | <b>175.1190</b> | 88.0631         | 158.0924  | 79.5498          |                |                  | 1 |

Found in **F5H0L8**, SEC23-interacting protein OS=Homo sapiens GN=SEC23IP PE=2 SV=1

Match to Query 12640: 1802.979348 from(902.496950, 2+) intensity(32097.1836)

Title: File394 Spectrum10127 scans: 11437

Data file \\192.168.1.104\public\raw data\Elite\_01\methylation\_ZW\SW620\2013-5-16-620-Kpropio-methyl-IP-Fr8-ZW.mgf

Click mouse within plot area to zoom in by factor of two about that point

Or,   to  Da Label all possible matches  Label matches used for scoring 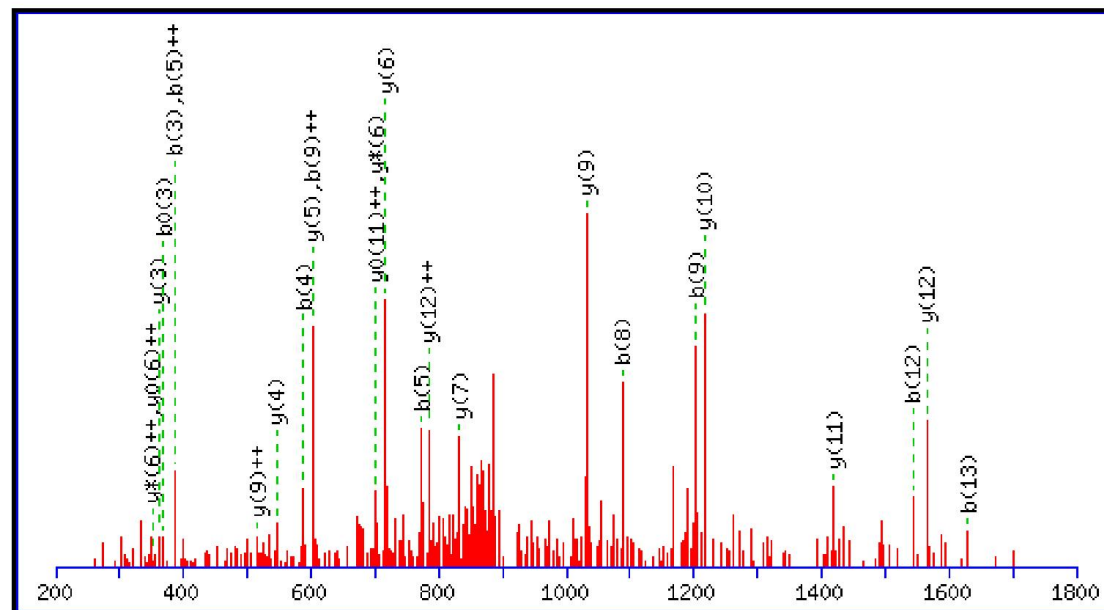Monoisotopic mass of neutral peptide  $M_r(\text{calc})$ : 1802.9799

Fixed modifications: Carbamidomethyl (C) (apply to specified residues only)

Variable modifications:

**K4** : Propionyl-(13CD3)Methyl (K)**K5** : Propionyl (K)**K11** : Propionyl (K)

Ions Score: 45 Expect: 0.017

Matches : 25/148 fragment ions using 44 most intense peaks ([help](#))

| #  | b                | b <sup>++</sup> | b <sup>+</sup> | b <sup>+++</sup> | b <sup>0</sup>  | b <sup>0++</sup> | Seq.     | y                | y <sup>++</sup>  | y <sup>+</sup>  | y <sup>+++</sup> | y <sup>0</sup> | y <sup>0++</sup> | #               |    |
|----|------------------|-----------------|----------------|------------------|-----------------|------------------|----------|------------------|------------------|-----------------|------------------|----------------|------------------|-----------------|----|
| 1  | 102.0560         | 51.5311         |                |                  | 84.0444         | 42.5258          | T        |                  |                  |                 |                  |                |                  | 14              |    |
| 2  | 239.1139         | 120.0606        |                |                  | 221.1033        | 111.0553         | H        | 1702.9395        | 851.9734         | 1685.9130       | 843.4601         | 1684.9290      | 842.9621         | 13              |    |
| 3  | <b>386.1823</b>  | 193.5948        |                |                  | <b>368.1717</b> | 184.5895         | F        | <b>1565.8806</b> | <b>783.4439</b>  | 1548.8541       | 774.9307         | 1547.8701      | 774.4387         | 12              |    |
| 4  | <b>588.3413</b>  | 294.6743        |                | 571.3147         | 286.1610        | 570.3307         | 285.6690 | K                | <b>1418.8122</b> | 709.9097        | 1401.7857        | 701.9965       | 1400.8016        | <b>700.9045</b> | 11 |
| 5  | <b>772.4625</b>  | <b>386.7349</b> | 755.4359       | 378.2216         | 754.4519        | 377.7296         | K        | <b>1216.6532</b> | 608.8302         | 1199.6266       | 600.3170         | 1198.6426      | 599.8250         | 10              |    |
| 6  | 859.4945         | 430.2509        | 842.4680       | 421.7376         | 841.4839        | 421.2456         | S        | <b>1032.5320</b> | <b>516.7696</b>  | 1015.5055       | 508.2564         | 1014.5214      | 507.7644         | 9               |    |
| 7  | 972.5786         | 486.7929        | 955.5520       | 478.2796         | 954.5680        | 477.7876         | L        | 945.5000         | 473.2536         | 928.4734        | 464.7404         | 927.4894       | 464.2483         | 8               |    |
| 8  | <b>1087.6055</b> | 544.3064        | 1070.5790      | 535.7931         | 1069.5949       | 535.3011         | D        | <b>832.4159</b>  | 416.7116         | 815.3894        | 408.1983         | 814.4054       | 407.7063         | 7               |    |
| 9  | <b>1202.6325</b> | <b>601.8199</b> | 1185.6059      | 593.3066         | 1184.6219       | 592.8146         | D        | <b>717.3890</b>  | 359.1981         | <b>700.3624</b> | <b>350.6849</b>  | 699.3784       | <b>350.1928</b>  | 6               |    |
| 10 | 1259.6539        | 630.3306        | 1242.6274      | 621.8173         | 1241.6433       | 621.3253         | G        | <b>602.3620</b>  | 301.6847         | 585.3385        | 293.1714         | 584.3515       | 292.6794         | 5               |    |
| 11 | 1443.7761        | 722.3912        | 1426.7485      | 713.8779         | 1425.7645       | 713.3859         | K        | <b>545.3406</b>  | 273.1739         | 528.3140        | 264.6606         | 527.3300       | 264.1686         | 4               |    |
| 12 | <b>1542.8435</b> | 771.9254        | 1525.8170      | 763.4121         | 1524.8329       | 762.9201         | V        | <b>361.2194</b>  | 181.1133         | 344.1928        | 172.6001         | 343.2088       | 172.1081         | 3               |    |
| 13 | <b>1629.8755</b> | 815.4414        | 1612.8490      | 806.9281         | 1611.8660       | 806.4361         | S        | 262.1510         | 131.5791         | 245.1294        | 123.0659         | 244.1404       | 122.5738         | 2               |    |
| 14 |                  |                 |                |                  |                 |                  | R        | 175.1190         | 88.0631          | 158.0924        | 79.5498          |                |                  | 1               |    |



Found in **P13639**, Elongation factor 2 OS=Homo sapiens GN=EEF2 PE=1 SV=4

Match to Query 14960: 2328.340908 from(1165.177730,2+) intensity(69909.9141)

Title: File1308 Spectrum18902 scans: 20356

Data file I:\2013-9-12-Hela-Prometh-Fr4-ZW.mgf

Click mouse within plot area to zoom in by factor of two about that point

Or,   to  Da

Label all possible matches  Label matches used for scoring

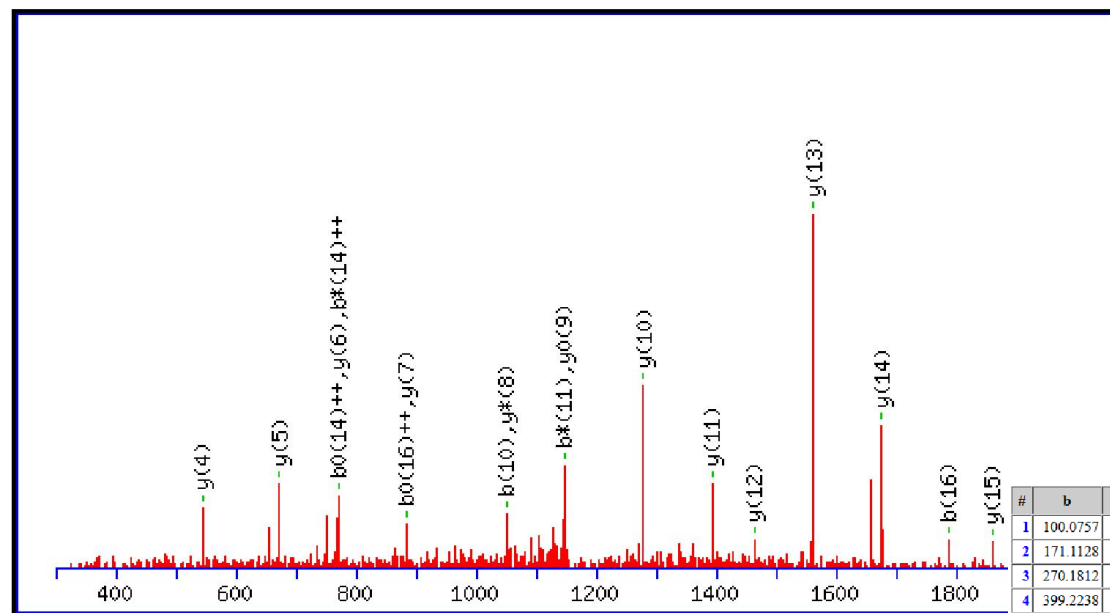

Monoisotopic mass of neutral peptide Mr(calc): 2328.3416

Fixed modifications: Carbamidomethyl (C) (apply to specified residues)

Variable modifications:

K6 : Propionyl (K)

K13 : Propionyl (K)

K19 : Propionyl-Methylation (K)

Ions Score: 78 Expect: 7.5e-006

Matches : 18/204 fragment ions using 17 most intense peaks

| #  | b                | b <sup>++</sup> | b <sup>*</sup>   | b <sup>++</sup> * | b <sup>0</sup> | b <sup>0++</sup> | Seq. | y                | y <sup>++</sup> | y <sup>*</sup>   | y <sup>++</sup> * | y <sup>0</sup>   | y <sup>0++</sup> | #  |
|----|------------------|-----------------|------------------|-------------------|----------------|------------------|------|------------------|-----------------|------------------|-------------------|------------------|------------------|----|
| 1  | 100.0757         | 50.5415         |                  |                   |                |                  | V    |                  |                 |                  |                   |                  |                  | 20 |
| 2  | 171.1128         | 86.0600         |                  |                   |                |                  | A    | 2230.2805        | 1115.6439       | 2213.2540        | 1107.1306         | 2212.2700        | 1106.6386        | 19 |
| 3  | 270.1812         | 135.5942        |                  |                   |                |                  | V    | 2159.2434        | 1080.1254       | 2142.2169        | 1071.6121         | 2141.2329        | 1071.1201        | 18 |
| 4  | 399.2238         | 200.1155        |                  |                   | 381.2132       | 191.1103         | E    | 2060.1750        | 1030.5911       | 2043.1485        | 1022.0779         | 2042.1645        | 1021.5859        | 17 |
| 5  | 470.2609         | 235.6341        |                  |                   | 452.2504       | 226.6288         | A    | 1931.1324        | 966.0699        | 1914.1059        | 957.5566          | 1913.1219        | 957.0646         | 16 |
| 6  | 654.3821         | 327.6947        | 637.3556         | 319.1814          | 636.3715       | 318.6894         | K    | <b>1860.0953</b> | 930.5513        | 1843.0688        | 922.0380          | 1842.0847        | 921.5460         | 15 |
| 7  | 768.4250         | 384.7162        | 751.3985         | 376.2029          | 750.4145       | 375.7109         | N    | <b>1675.9741</b> | 838.4907        | 1658.9476        | 829.9774          | 1657.9636        | 829.4854         | 14 |
| 8  | 865.4778         | 433.2425        | 848.4512         | 424.7293          | 847.4672       | 424.2373         | P    | <b>1561.9312</b> | 781.4692        | 1544.9047        | 772.9560          | 1543.9206        | 772.4640         | 13 |
| 9  | 936.5149         | 468.7611        | 919.4884         | 460.2478          | 918.5043       | 459.7558         | A    | <b>1464.8784</b> | 732.9429        | 1447.8519        | 724.4296          | 1446.8679        | 723.9376         | 12 |
| 10 | <b>1051.5419</b> | 526.2746        | 1034.5153        | 517.7613          | 1033.5313      | 517.2693         | D    | <b>1393.8413</b> | 697.4243        | 1376.8148        | 688.9110          | 1375.8308        | 688.4190         | 11 |
| 11 | 1164.6259        | 582.8166        | <b>1147.5994</b> | 574.3033          | 1146.6153      | 573.8113         | L    | <b>1278.8144</b> | 639.9108        | 1261.7878        | 631.3976          | 1260.8038        | 630.9055         | 10 |
| 12 | 1261.6787        | 631.3430        | 1244.6521        | 622.8297          | 1243.6681      | 622.3377         | P    | 1165.7303        | 583.3688        | 1148.7038        | 574.8555          | <b>1147.7198</b> | 574.3635         | 9  |
| 13 | 1445.7999        | 723.4036        | 1428.7733        | 714.8903          | 1427.7893      | 714.3983         | K    | 1068.6776        | 534.8424        | <b>1051.6510</b> | 526.3291          | 1050.6670        | 525.8371         | 8  |
| 14 | 1558.8839        | 779.9456        | 1541.8574        | <b>771.4323</b>   | 1540.8734      | <b>770.9403</b>  | L    | <b>884.5564</b>  | 442.7818        | 867.5298         | 434.2686          | 866.5458         | 433.7765         | 7  |
| 15 | 1657.9523        | 829.4798        | 1640.9258        | 820.9665          | 1639.9418      | 820.4745         | V    | <b>771.4723</b>  | 386.2398        | 754.4458         | 377.7265          | 753.4617         | 377.2345         | 6  |
| 16 | <b>1786.9949</b> | 894.0011        | 1769.9684        | 885.4878          | 1768.9844      | <b>884.9958</b>  | E    | <b>672.4039</b>  | 336.7056        | 655.3774         | 328.1923          | 654.3933         | 327.7003         | 5  |
| 17 | 1844.0164        | 922.5118        | 1826.9898        | 913.9986          | 1826.0058      | 913.5066         | G    | <b>543.3613</b>  | 272.1843        | 526.3348         | 263.6710          |                  |                  | 4  |
| 18 | 1957.1005        | 979.0539        | 1940.0739        | 970.5406          | 1939.0899      | 970.0486         | L    | 486.3398         | 243.6736        | 469.3133         | 235.1603          |                  |                  | 3  |
| 19 | 2155.2373        | 1078.1223       | 2138.2107        | 1069.6090         | 2137.2267      | 1069.1170        | K    | 373.2558         | 187.1315        | 356.2292         | 178.6183          |                  |                  | 2  |
| 20 |                  |                 |                  |                   |                |                  | R    | 175.1190         | 88.0631         | 158.0924         | 79.5498           |                  |                  | 1  |

MS/MS Fragmentation of **KKPHR**Found in **Q9NYL2**, Mitogen-activated protein kinase kinase kinase MLT OS=Homo sapiens GN=MLTK PE=1 SV=3

Match to Query 6542: 794.502788 from(398.258670,2+) intensity(291034.0000)

Title: File1989 Spectrum7658 scans: 8488

Data file I:\2013-12-03-SIMM7721-FR13-ZW2.mgf

Click mouse within plot area to zoom in by factor of two about that point

Or,  100  800  Label all possible matches  Label matches used for scoring 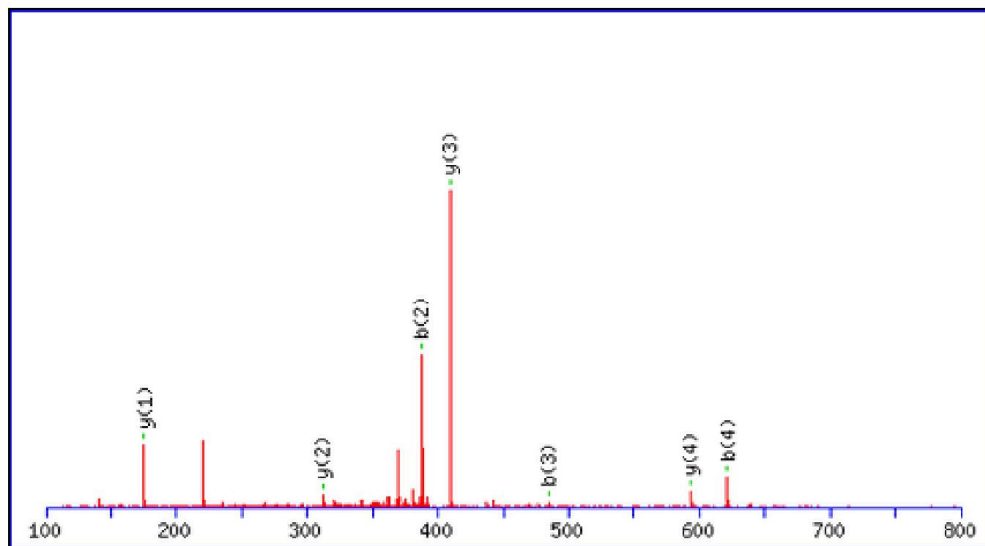

Monoisotopic mass of neutral peptide Mr(calc): 794.5035

Fixed modifications: Carbamidomethyl (C) (apply to specified residues or termini only)

Variable modifications:

K1 : Propionyl-(13CD3)Methyl (K)

K2 : Propionyl (K)

Ions Score: 25 Expect: 0.13

Matches : 7/32 fragment ions using 14 most intense peaks ([help](#))

| # | b               | b <sup>++</sup> | b <sup>*</sup> | b <sup>*++</sup> | Seq. | y               | y <sup>++</sup> | y <sup>*</sup> | y <sup>*++</sup> | # |
|---|-----------------|-----------------|----------------|------------------|------|-----------------|-----------------|----------------|------------------|---|
| 1 | 203.1663        | 102.0868        | 186.1397       | 93.5735          | K    |                 |                 |                |                  | 5 |
| 2 | <b>387.2875</b> | 194.1474        | 370.2609       | 185.6341         | K    | <b>593.3518</b> | 297.1795        | 576.3253       | 288.6663         | 4 |
| 3 | <b>484.3402</b> | 242.6738        | 467.3137       | 234.1605         | P    | <b>409.2306</b> | 205.1190        | 392.2041       | 196.6057         | 3 |
| 4 | <b>621.3991</b> | 311.2032        | 604.3726       | 302.6899         | H    | <b>312.1779</b> | 156.5926        | 295.1513       | 148.0793         | 2 |
| 5 |                 |                 |                |                  | R    | <b>175.1190</b> | 88.0631         | 158.0924       | 79.5498          | 1 |
