# Supplementary material
Source: PubMed Central journal article supplement (PMC4350029)

# Supplementary Figures

## Labeling efficiency

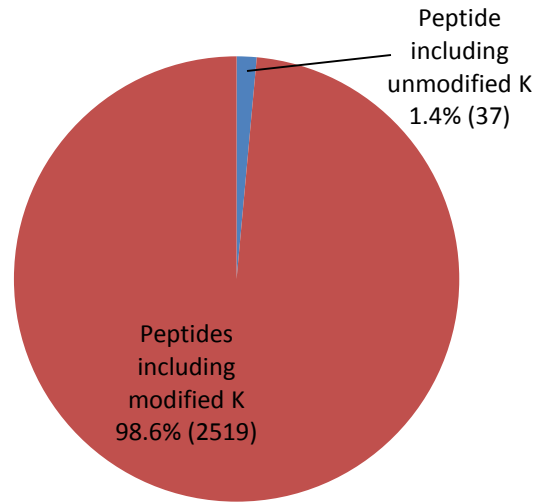

Supplement: supp_M114.044255_mcp.M114.044255-9.pdf [file supp_M114.044255_mcp.M114.044255-9.pdf]
